# Supplementary material for: Cabergoline as a Novel Strategy for Post-Pregnancy Breast Cancer Prevention in Mice and Human
Source: Research Square preprint supplement (doi:10.21203/rs.3.rs-3854490/v1), 2024-02-05
Supplement: Supplementary file 1 [file 1227bb40cb462c24148afc43.xlsx]

## Sheet: Supplementary_Table_S4
	GO BP DOWN GENES
	ID	Description	Gene Ratio	Bg Ratio	P value	P Adj	q value	Gene ID	Count
	GO:0003012	muscle system process	22/207	432/28943	7.84767e-13	1.73512e-09	1.50593e-09	Edn2/Trpv1/Nppc/Edn3/Actc1/Myog/Mstn/Prkag3/Clcn1/Cacna1s/Atp1a2/Myom2/Scn4a/Mylpf/Hrc/Pgam2/Ryr1/Mybpc2/Ttn/Casq1/Tnni2/Tnnt3	22
	GO:0006936	muscle contraction	17/207	317/28943	1.58172e-10	1.74859e-07	1.51762e-07	Edn2/Trpv1/Edn3/Actc1/Clcn1/Cacna1s/Atp1a2/Myom2/Scn4a/Mylpf/Pgam2/Ryr1/Mybpc2/Ttn/Casq1/Tnni2/Tnnt3	17
	GO:0071621	granulocyte chemotaxis	11/207	129/28943	2.44385e-09	1.35593e-06	1.17683e-06	Edn2/Edn3/Trem1/Cxcr1/Ppbp/Cxcl3/Thbs1/Cxcl2/S100a14/Mstn/S100a9	11
	GO:0097530	granulocyte migration	12/207	163/28943	2.45307e-09	1.35593e-06	1.17683e-06	Edn2/Umodl1/Edn3/Trem1/Cxcr1/Ppbp/Cxcl3/Thbs1/Cxcl2/S100a14/Mstn/S100a9	12
	GO:0090257	regulation of muscle system process	14/207	258/28943	5.92067e-09	2.61812e-06	2.27229e-06	Edn2/Nppc/Myog/Mstn/Prkag3/Cacna1s/Atp1a2/Scn4a/Hrc/Ryr1/Ttn/Casq1/Tnni2/Tnnt3	14
	GO:0007517	muscle organ development	15/207	371/28943	8.4318e-08	3.10712e-05	2.6967e-05	Pax7/Pitx2/Actc1/Lbx1/Myog/Mstn/Crhr2/Jph1/Rbfox1/Cntfr/Cacna1s/Ky/Mylpf/Ryr1/Ttn	15
	GO:0097529	myeloid leukocyte migration	12/207	243/28943	2.06313e-07	6.51653e-05	5.65576e-05	Edn2/Umodl1/Edn3/Trem1/Cxcr1/Ppbp/Cxcl3/Thbs1/Cxcl2/S100a14/Mstn/S100a9	12
	GO:0019932	second-messenger-mediated signaling	13/207	309/28943	4.00935e-07	0.000110809	9.61717e-05	Ghrhr/Edn2/Crhr1/Drd4/Nppc/Rln1/Edn3/Cxcr1/Thbs1/Crhr2/Mafa/Defb1/Casq1	13
	GO:1990266	neutrophil migration	9/207	133/28943	5.20668e-07	0.000127911	0.000111015	Edn2/Umodl1/Edn3/Trem1/Cxcr1/Ppbp/Cxcl3/Cxcl2/S100a9	9
	GO:0030593	neutrophil chemotaxis	8/207	103/28943	7.94495e-07	0.000169405	0.000147028	Edn2/Edn3/Trem1/Cxcr1/Ppbp/Cxcl3/Cxcl2/S100a9	8
	GO:0030595	leukocyte chemotaxis	11/207	228/28943	8.42813e-07	0.000169405	0.000147028	Edn2/Edn3/Trem1/Cxcr1/Ppbp/Cxcl3/Thbs1/Cxcl2/S100a14/Mstn/S100a9	11
	GO:0060047	heart contraction	11/207	242/28943	1.50984e-06	0.000278189	0.000241443	Kcnh6/Edn2/Trpv1/Sgcz/Edn3/Actc1/Crhr2/Atp1a2/Hrc/Ttn/Tnni2	11
	GO:0003015	heart process	11/207	254/28943	2.41324e-06	0.000410437	0.000356222	Kcnh6/Edn2/Trpv1/Sgcz/Edn3/Actc1/Crhr2/Atp1a2/Hrc/Ttn/Tnni2	11
	GO:0060326	cell chemotaxis	12/207	314/28943	3.06142e-06	0.000483485	0.000419621	Edn2/Edn3/Trem1/Cxcr1/Defb48/Ppbp/Cxcl3/Thbs1/Cxcl2/S100a14/Mstn/S100a9	12
	GO:0060538	skeletal muscle organ development	10/207	219/28943	4.37526e-06	0.00064013	0.000555575	Pax7/Pitx2/Myog/Mstn/Crhr2/Rbfox1/Cntfr/Cacna1s/Mylpf/Ryr1	10
	GO:0006941	striated muscle contraction	9/207	173/28943	4.63233e-06	0.00064013	0.000555575	Actc1/Cacna1s/Atp1a2/Scn4a/Pgam2/Ttn/Casq1/Tnni2/Tnnt3	9
	GO:0055001	muscle cell development	10/207	229/28943	6.48805e-06	0.000843829	0.000732367	Pitx2/Actc1/Myog/Cacna1s/Sypl2/Myom2/Ryr1/Ttn/Casq1/Tnnt3	10
	GO:0006874	cellular calcium ion homeostasis	11/207	292/28943	9.09662e-06	0.00111737	0.000969774	Pkhd1/Edn2/Edn3/Atp2b3/Atp2b2/Sypl2/Dhrs7c/Hrc/Pygm/Ryr1/Casq1	11
	GO:0006813	potassium ion transport	10/207	244/28943	1.12939e-05	0.00131426	0.00114066	Kcnh6/Atp1a4/Edn3/Kcnmb3/Kcng4/Slc9a4/Kcnj11/Kcnj12/Atp1a2/Scn4a	10
	GO:0006875	cellular metal ion homeostasis	13/207	425/28943	1.31593e-05	0.00140091	0.00121586	Pkhd1/Edn2/Atp1a4/Edn3/Atp2b3/Atp2b2/Sypl2/Dhrs7c/Atp1a2/Hrc/Pygm/Ryr1/Casq1	13
	GO:0098739	import across plasma membrane	9/207	198/28943	1.37566e-05	0.00140091	0.00121586	Trpv1/Atp1a4/Slc2a5/Slc9a4/Thbs1/Kcnj11/Kcnj12/Cacna1s/Atp1a2	9
	GO:0098657	import into cell	10/207	250/28943	1.39394e-05	0.00140091	0.00121586	Trpv1/Atp1a4/Slc2a5/Slc9a4/Slc22a1/Thbs1/Kcnj11/Kcnj12/Cacna1s/Atp1a2	10
	GO:0030003	cellular cation homeostasis	14/207	498/28943	1.56962e-05	0.00150888	0.00130957	Pkhd1/Edn2/Atp1a4/Edn3/Atp2b3/Slc9a4/Atp2b2/Sypl2/Dhrs7c/Atp1a2/Hrc/Pygm/Ryr1/Casq1	14
	GO:0007519	skeletal muscle tissue development	9/207	207/28943	1.95804e-05	0.00180385	0.00156558	Pax7/Pitx2/Myog/Mstn/Crhr2/Rbfox1/Cacna1s/Mylpf/Ryr1	9
	GO:0072503	cellular divalent inorganic cation homeostasis	11/207	320/28943	2.12966e-05	0.00187196	0.00162469	Pkhd1/Edn2/Edn3/Atp2b3/Atp2b2/Sypl2/Dhrs7c/Hrc/Pygm/Ryr1/Casq1	11
	GO:0006816	calcium ion transport	13/207	449/28943	2.33775e-05	0.00187196	0.00162469	Drd4/Trpv1/Atp2b3/Plpp4/Atp2b2/Cacng6/Crhr2/Cacna1s/Dhrs7c/Atp1a2/Hrc/Ryr1/Casq1	13
	GO:0050900	leukocyte migration	12/207	385/28943	2.36494e-05	0.00187196	0.00162469	Edn2/Umodl1/Edn3/Trem1/Cxcr1/Ppbp/Cxcl3/Thbs1/Cxcl2/S100a14/Mstn/S100a9	12
	GO:0055074	calcium ion homeostasis	11/207	324/28943	2.38694e-05	0.00187196	0.00162469	Pkhd1/Edn2/Edn3/Atp2b3/Atp2b2/Sypl2/Dhrs7c/Hrc/Pygm/Ryr1/Casq1	11
	GO:0070588	calcium ion transmembrane transport	11/207	325/28943	2.4553e-05	0.00187196	0.00162469	Drd4/Trpv1/Atp2b3/Atp2b2/Cacng6/Cacna1s/Dhrs7c/Atp1a2/Hrc/Ryr1/Casq1	11
	GO:0014808	release of sequestered calcium ion into cytosol by sarcoplasmic reticulum	4/207	25/28943	2.85766e-05	0.00193673	0.0016809	Dhrs7c/Hrc/Ryr1/Casq1	4
	GO:0006937	regulation of muscle contraction	8/207	167/28943	2.86356e-05	0.00193673	0.0016809	Edn2/Cacna1s/Atp1a2/Scn4a/Ryr1/Casq1/Tnni2/Tnnt3	8
	GO:0098659	inorganic cation import across plasma membrane	7/207	122/28943	2.89064e-05	0.00193673	0.0016809	Trpv1/Atp1a4/Slc9a4/Kcnj11/Kcnj12/Cacna1s/Atp1a2	7
	GO:0099587	inorganic ion import across plasma membrane	7/207	122/28943	2.89064e-05	0.00193673	0.0016809	Trpv1/Atp1a4/Slc9a4/Kcnj11/Kcnj12/Cacna1s/Atp1a2	7
	GO:1903514	release of sequestered calcium ion into cytosol by endoplasmic reticulum	4/207	26/28943	3.35836e-05	0.00218392	0.00189545	Dhrs7c/Hrc/Ryr1/Casq1	4
	GO:0046683	response to organophosphorus	6/207	91/28943	5.0044e-05	0.00316135	0.00274376	Trpv1/Duox2/Duox1/Kcnj11/Pygm/Ryr1	6
	GO:0072507	divalent inorganic cation homeostasis	11/207	359/28943	6.04155e-05	0.00366956	0.00318485	Pkhd1/Edn2/Edn3/Atp2b3/Atp2b2/Sypl2/Dhrs7c/Hrc/Pygm/Ryr1/Casq1	11
	GO:0006959	humoral immune response	12/207	425/28943	6.14083e-05	0.00366956	0.00318485	Wfdc15a/Acod1/Ppbp/Cxcl3/Ighv9-4/Ighv1-62-3/Ighv1-39/Ighv2-4/Cxcl2/Cfd/S100a9/Defb1	12
	GO:0010460	positive regulation of heart rate	4/207	31/28943	6.87315e-05	0.00399909	0.00347085	Edn2/Edn3/Crhr2/Hrc	4
	GO:0048241	epinephrine transport	3/207	12/28943	7.56374e-05	0.00422389	0.00366595	Crhr1/Slc22a1/Crhr2	3
	GO:0070296	sarcoplasmic reticulum calcium ion transport	4/207	32/28943	7.8112e-05	0.00422389	0.00366595	Dhrs7c/Hrc/Ryr1/Casq1	4
	GO:0002690	positive regulation of leukocyte chemotaxis	6/207	99/28943	8.02367e-05	0.00422389	0.00366595	Edn2/Edn3/Trem1/Thbs1/S100a14/Mstn	6
	GO:0019935	cyclic-nucleotide-mediated signaling	6/207	99/28943	8.02367e-05	0.00422389	0.00366595	Ghrhr/Crhr1/Nppc/Thbs1/Crhr2/Defb1	6
	GO:0090303	positive regulation of wound healing	5/207	62/28943	8.28469e-05	0.00425987	0.00369718	Duox2/Cldn1/Thbs1/Duox1/S100a9	5
	GO:0042692	muscle cell differentiation	12/207	449/28943	0.000103159	0.00518375	0.00449902	Pitx2/Actc1/Myog/Cfd/Fbxo40/Cacna1s/Sypl2/Myom2/Ryr1/Ttn/Casq1/Tnnt3	12
	GO:0071805	potassium ion transmembrane transport	8/207	207/28943	0.000129392	0.00635745	0.00551769	Kcnh6/Atp1a4/Edn3/Kcng4/Slc9a4/Kcnj11/Kcnj12/Atp1a2	8
	GO:0014074	response to purine-containing compound	6/207	110/28943	0.000143714	0.00690764	0.0059952	Trpv1/Duox2/Duox1/Kcnj11/Pygm/Ryr1	6
	GO:0030239	myofibril assembly	5/207	71/28943	0.000158238	0.00744392	0.00646065	Actc1/Myom2/Ttn/Casq1/Tnnt3	5
	GO:0002027	regulation of heart rate	6/207	113/28943	0.000166549	0.00762872	0.00662104	Kcnh6/Edn2/Trpv1/Edn3/Crhr2/Hrc	6
	GO:0055002	striated muscle cell development	5/207	72/28943	0.000169067	0.00762872	0.00662104	Actc1/Myom2/Ttn/Casq1/Tnnt3	5
	GO:0003009	skeletal muscle contraction	4/207	42/28943	0.000229918	0.010167	0.008824	Scn4a/Casq1/Tnni2/Tnnt3	4
	GO:0060537	muscle tissue development	12/207	494/28943	0.000248896	0.0107186	0.00930276	Sgcz/Pax7/Pitx2/Actc1/Myog/Mstn/Crhr2/Rbfox1/Cacna1s/Mylpf/Ryr1/Ttn	12
	GO:0045823	positive regulation of heart contraction	4/207	43/28943	0.000252088	0.0107186	0.00930276	Edn2/Edn3/Crhr2/Hrc	4
	GO:1903036	positive regulation of response to wounding	5/207	79/28943	0.000261544	0.0109108	0.00946961	Duox2/Cldn1/Thbs1/Duox1/S100a9	5
	GO:1901077	regulation of relaxation of muscle	3/207	18/28943	0.000271796	0.0111286	0.00965858	Nppc/Hrc/Ttn	3
	GO:0019730	antimicrobial humoral response	7/207	177/28943	0.000297084	0.0116635	0.0101229	Wfdc15a/Acod1/Ppbp/Cxcl3/Cxcl2/S100a9/Defb1	7
	GO:0051924	regulation of calcium ion transport	9/207	296/28943	0.000299574	0.0116635	0.0101229	Drd4/Plpp4/Atp2b2/Cacng6/Crhr2/Dhrs7c/Atp1a2/Hrc/Casq1	9
	GO:0002688	regulation of leukocyte chemotaxis	6/207	126/28943	0.000300687	0.0116635	0.0101229	Edn2/Edn3/Trem1/Thbs1/S100a14/Mstn	6
	GO:0018958	phenol-containing compound metabolic process	6/207	127/28943	0.000313742	0.0119601	0.0103802	Drd4/Duox2/Dio2/Pnmt/Atp2b2/Crhr2	6
	GO:0002790	peptide secretion	9/207	299/28943	0.000322484	0.0120795	0.0104839	Ghrhr/Crhr1/Trpv1/Edn3/Dio2/Kcnj11/Crhr2/S100a9/Mafa	9
	GO:0034142	toll-like receptor 4 signaling pathway	4/207	46/28943	0.000327803	0.0120795	0.0104839	Nepn/Acod1/Rab7b/S100a14	4
	GO:0048246	macrophage chemotaxis	4/207	47/28943	0.000356303	0.0127062	0.0110279	Edn2/Trem1/Thbs1/Mstn	4
	GO:1903524	positive regulation of blood circulation	4/207	47/28943	0.000356303	0.0127062	0.0110279	Edn2/Edn3/Crhr2/Hrc	4
	GO:1990573	potassium ion import across plasma membrane	4/207	48/28943	0.000386533	0.0135655	0.0117736	Atp1a4/Kcnj11/Kcnj12/Atp1a2	4
	GO:0045214	sarcomere organization	4/207	49/28943	0.000418552	0.0144597	0.0125497	Myom2/Ttn/Casq1/Tnnt3	4
	GO:0010959	regulation of metal ion transport	11/207	458/28943	0.000493997	0.0168035	0.0145839	Drd4/Edn3/Plpp4/Atp2b2/Cacng6/Crhr2/Nkain1/Dhrs7c/Atp1a2/Hrc/Casq1	11
	GO:0050905	neuromuscular process	7/207	194/28943	0.000515383	0.0172653	0.0149847	Igdcc3/Atp2b2/Rbfox1/Scn4a/Casq1/Tnni2/Tnnt3	7
	GO:0015833	peptide transport	9/207	320/28943	0.000526853	0.0173862	0.0150896	Ghrhr/Crhr1/Trpv1/Edn3/Dio2/Kcnj11/Crhr2/S100a9/Mafa	9
	GO:0010880	regulation of release of sequestered calcium ion into cytosol by sarcoplasmic reticulum	3/207	23/28943	0.000574548	0.0186813	0.0162136	Dhrs7c/Hrc/Casq1	3
	GO:0008016	regulation of heart contraction	7/207	199/28943	0.000599403	0.0192069	0.0166699	Kcnh6/Edn2/Trpv1/Edn3/Crhr2/Atp1a2/Hrc	7
	GO:0051480	regulation of cytosolic calcium ion concentration	4/207	55/28943	0.000651594	0.0203405	0.0176537	Atp2b3/Atp2b2/Hrc/Ryr1	4
	GO:0003417	growth plate cartilage development	3/207	24/28943	0.000653178	0.0203405	0.0176537	Nppc/Thbs1/Col9a1	3
	GO:0051146	striated muscle cell differentiation	9/207	334/28943	0.000714655	0.0219459	0.019047	Pitx2/Actc1/Myog/Cacna1s/Myom2/Ryr1/Ttn/Casq1/Tnnt3	9
	GO:0007263	nitric oxide mediated signal transduction	3/207	25/28943	0.000738351	0.0220607	0.0191467	Rln1/Thbs1/Mafa	3
	GO:0010759	positive regulation of macrophage chemotaxis	3/207	25/28943	0.000738351	0.0220607	0.0191467	Trem1/Thbs1/Mstn	3
	GO:0050921	positive regulation of chemotaxis	6/207	151/28943	0.000784545	0.0231284	0.0200733	Edn2/Edn3/Trem1/Thbs1/S100a14/Mstn	6
	GO:0046031	ADP metabolic process	5/207	101/28943	0.000809777	0.0235027	0.0203982	Myog/Prkag3/Ak1/Pgam2/Eno3	5
	GO:0048266	behavioral response to pain	3/207	26/28943	0.000830277	0.0235027	0.0203982	Crhr1/Trpv1/Thbs1	3
	GO:0050879	multicellular organismal movement	4/207	59/28943	0.000850391	0.0235027	0.0203982	Scn4a/Casq1/Tnni2/Tnnt3	4
	GO:0050881	musculoskeletal movement	4/207	59/28943	0.000850391	0.0235027	0.0203982	Scn4a/Casq1/Tnni2/Tnnt3	4
	GO:0071622	regulation of granulocyte chemotaxis	4/207	59/28943	0.000850391	0.0235027	0.0203982	Trem1/Thbs1/S100a14/Mstn	4
	GO:0016052	carbohydrate catabolic process	6/207	154/28943	0.000869126	0.0237239	0.0205902	Myog/Prkag3/Ppp1r3c/Pygm/Pgam2/Eno3	6
	GO:0051047	positive regulation of secretion	10/207	420/28943	0.000945599	0.025393	0.0220389	Ghrhr/Edn2/Pcsk1/Crhr1/Trpv1/Nppc/Edn3/Crhr2/S100a9/Ttn	10
	GO:0009135	purine nucleoside diphosphate metabolic process	5/207	105/28943	0.000964729	0.025393	0.0220389	Myog/Prkag3/Ak1/Pgam2/Eno3	5
	GO:0009179	purine ribonucleoside diphosphate metabolic process	5/207	105/28943	0.000964729	0.025393	0.0220389	Myog/Prkag3/Ak1/Pgam2/Eno3	5
	GO:0042886	amide transport	9/207	353/28943	0.00105362	0.0272323	0.0236351	Ghrhr/Crhr1/Trpv1/Edn3/Dio2/Kcnj11/Crhr2/S100a9/Mafa	9
	GO:0002687	positive regulation of leukocyte migration	6/207	160/28943	0.00105924	0.0272323	0.0236351	Edn2/Edn3/Trem1/Thbs1/S100a14/Mstn	6
	GO:0006165	nucleoside diphosphate phosphorylation	5/207	109/28943	0.0011407	0.0285342	0.0247651	Myog/Prkag3/Ak1/Pgam2/Eno3	5
	GO:0033555	multicellular organismal response to stress	5/207	109/28943	0.0011407	0.0285342	0.0247651	Crhr1/Drd4/Trpv1/Thbs1/Atp1a2	5
	GO:0033198	response to ATP	3/207	29/28943	0.0011486	0.0285342	0.0247651	Trpv1/Kcnj11/Ryr1	3
	GO:0035637	multicellular organismal signaling	6/207	163/28943	0.00116551	0.0286327	0.0248506	Kcnh6/Gria1/Kcnmb3/Clcn1/Scn4a/Hrc	6
	GO:0008217	regulation of blood pressure	7/207	226/28943	0.00125926	0.0305958	0.0265544	Edn2/Trpv1/Gpr37l1/Edn3/Slc2a5/Crhr2/Atp1a2	7
	GO:0046939	nucleotide phosphorylation	5/207	113/28943	0.00133939	0.032189	0.0279372	Myog/Prkag3/Ak1/Pgam2/Eno3	5
	GO:1905517	macrophage migration	4/207	67/28943	0.00136988	0.0325678	0.0282659	Edn2/Trem1/Thbs1/Mstn	4
	GO:1905523	positive regulation of macrophage migration	3/207	31/28943	0.00139819	0.0328871	0.028543	Trem1/Thbs1/Mstn	3
	GO:0019933	cAMP-mediated signaling	4/207	68/28943	0.00144744	0.0336873	0.0292375	Ghrhr/Crhr1/Crhr2/Defb1	4
	GO:0003416	endochondral bone growth	3/207	32/28943	0.00153474	0.0353471	0.0306781	Nppc/Thbs1/Col9a1	3
	GO:0009185	ribonucleoside diphosphate metabolic process	5/207	117/28943	0.00156252	0.0356158	0.0309113	Myog/Prkag3/Ak1/Pgam2/Eno3	5
	GO:1903531	negative regulation of secretion by cell	6/207	177/28943	0.00177336	0.0400091	0.0347243	Edn2/Crhr1/Drd4/Edn3/Kcnj11/Crhr2	6
	GO:0010758	regulation of macrophage chemotaxis	3/207	34/28943	0.00183226	0.0409205	0.0355153	Trem1/Thbs1/Mstn	3
	GO:0010927	cellular component assembly involved in morphogenesis	5/207	126/28943	0.00216304	0.0474662	0.0411963	Actc1/Myom2/Ttn/Casq1/Tnnt3	5
	GO:0051926	negative regulation of calcium ion transport	4/207	76/28943	0.00218135	0.0474662	0.0411963	Drd4/Crhr2/Atp1a2/Hrc	4
	GO:0071318	cellular response to ATP	2/207	10/28943	0.0022058	0.0474662	0.0411963	Trpv1/Ryr1	2
	GO:0097553	calcium ion transmembrane import into cytosol	6/207	185/28943	0.00221442	0.0474662	0.0411963	Trpv1/Cacna1s/Dhrs7c/Hrc/Ryr1/Casq1	6
	GO:0006814	sodium ion transport	7/207	250/28943	0.00223269	0.0474662	0.0411963	Drd4/Atp1a4/Slc9a4/Nkain1/Slc34a2/Atp1a2/Scn4a	7
	GO:0055075	potassium ion homeostasis	3/207	37/28943	0.00234199	0.0488503	0.0423976	Atp1a4/Slc9a4/Atp1a2	3
	GO:0090075	relaxation of muscle	3/207	37/28943	0.00234199	0.0488503	0.0423976	Nppc/Hrc/Ttn	3
	GO:0003073	regulation of systemic arterial blood pressure	5/207	129/28943	0.00239619	0.0495138	0.0429735	Edn2/Trpv1/Gpr37l1/Edn3/Slc2a5	5
	GO BP UP GENES
	ID	Description	Gene Ratio	Bg Ratio	P value	P Adj	q-value	Gene ID	Count
	GO:0006956	complement activation	19/113	193/28943	1.79478e-21	1.56325e-18	1.44527e-18	Ighg2b/Ighg2c/Ighg1/Ighv5-9/Ighv1-67/Ighv1-69/Ighv1-81/Ighv8-5/Ighv1-50/Ighv15-2/Ighg3/Ighv8-4/Ighv1-23/Ighv1-15/C6/Ighv1-75/Ighv8-2/Cd5l/Ighv2-5	19
	GO:0006911	phagocytosis, engulfment	18/113	201/28943	1.23397e-19	4.31697e-17	3.99116e-17	Ighg2b/Ighg2c/Ighg1/Ighv5-9/Ighv1-67/Ighv1-69/Ighv1-81/Ighv8-5/Ighv1-50/Ighv15-2/Ighg3/Ighv8-4/Ighv1-23/Ighv1-15/Ighv1-75/Ighv8-2/Alox15/Ighv2-5	18
	GO:0006958	complement activation, classical pathway	17/113	167/28943	1.4869e-19	4.31697e-17	3.99116e-17	Ighg2b/Ighg2c/Ighg1/Ighv5-9/Ighv1-67/Ighv1-69/Ighv1-81/Ighv8-5/Ighv1-50/Ighv15-2/Ighg3/Ighv8-4/Ighv1-23/Ighv1-15/Ighv1-75/Ighv8-2/Ighv2-5	17
	GO:0006910	phagocytosis, recognition	17/113	170/28943	2.02447e-19	4.40828e-17	4.07557e-17	Ighg2b/Ighg2c/Ighg1/Ighv5-9/Ighv1-67/Ighv1-69/Ighv1-81/Ighv8-5/Ighv1-50/Ighv15-2/Ighg3/Ighv8-4/Ighv1-23/Ighv1-15/Ighv1-75/Ighv8-2/Ighv2-5	17
	GO:0099024	plasma membrane invagination	18/113	210/28943	2.73221e-19	4.75952e-17	4.4003e-17	Ighg2b/Ighg2c/Ighg1/Ighv5-9/Ighv1-67/Ighv1-69/Ighv1-81/Ighv8-5/Ighv1-50/Ighv15-2/Ighg3/Ighv8-4/Ighv1-23/Ighv1-15/Ighv1-75/Ighv8-2/Alox15/Ighv2-5	18
	GO:0010324	membrane invagination	18/113	218/28943	5.3727e-19	7.79937e-17	7.21073e-17	Ighg2b/Ighg2c/Ighg1/Ighv5-9/Ighv1-67/Ighv1-69/Ighv1-81/Ighv8-5/Ighv1-50/Ighv15-2/Ighg3/Ighv8-4/Ighv1-23/Ighv1-15/Ighv1-75/Ighv8-2/Alox15/Ighv2-5	18
	GO:0050853	B cell receptor signaling pathway	17/113	182/28943	6.57541e-19	7.8673e-17	7.27353e-17	Ighg2b/Ighg2c/Ighg1/Ighv5-9/Ighv1-67/Ighv1-69/Ighv1-81/Ighv8-5/Ighv1-50/Ighv15-2/Ighg3/Ighv8-4/Ighv1-23/Ighv1-15/Ighv1-75/Ighv8-2/Ighv2-5	17
	GO:0002455	humoral immune response mediated by circulating immunoglobulin	17/113	183/28943	7.22599e-19	7.8673e-17	7.27353e-17	Ighg2b/Ighg2c/Ighg1/Ighv5-9/Ighv1-67/Ighv1-69/Ighv1-81/Ighv8-5/Ighv1-50/Ighv15-2/Ighg3/Ighv8-4/Ighv1-23/Ighv1-15/Ighv1-75/Ighv8-2/Ighv2-5	17
	GO:0050871	positive regulation of B cell activation	17/113	222/28943	1.95816e-17	1.89506e-15	1.75203e-15	Ighg2b/Ighg2c/Ighg1/Ighv5-9/Ighv1-67/Ighv1-69/Ighv1-81/Ighv8-5/Ighv1-50/Ighv15-2/Ighg3/Ighv8-4/Ighv1-23/Ighv1-15/Ighv1-75/Ighv8-2/Ighv2-5	17
	GO:0008037	cell recognition	18/113	302/28943	1.7892e-16	1.55839e-14	1.44077e-14	Ighg2b/Ighg2c/Ighg1/Ighv5-9/Ighv1-67/Ighv1-69/Ighv1-81/Ighv8-5/Ighv1-50/Ighv15-2/Ighg3/Ighv8-4/Ighv1-23/Ighv1-15/Ighv1-75/Ighv8-2/Tnp2/Ighv2-5	18
	GO:0050851	antigen receptor-mediated signaling pathway	18/113	307/28943	2.38747e-16	1.89044e-14	1.74776e-14	Ighg2b/Ighg2c/Ighg1/Ighv5-9/Ighv1-67/Ighv1-69/Ighv1-81/Ighv8-5/Ighv1-50/Ighv15-2/Ighg3/Ighv8-4/Ighv1-23/Ighv1-15/Ighv1-75/Ighv8-2/Ighv2-5/Themis3	18
	GO:0006959	humoral immune response	20/113	425/28943	3.15827e-16	2.29238e-14	2.11937e-14	Ighg2b/Ighg2c/Ighg1/Ighv5-9/Ighv1-67/Ighv1-69/Ighv1-81/Ighv8-5/Ighv1-50/Ighv15-2/Ighg3/Ighv8-4/Ighv1-23/Ighv1-15/C6/Ighv1-75/Ighv8-2/Cd5l/Ighv2-5/Gm13272	20
	GO:0050864	regulation of B cell activation	17/113	278/28943	8.54993e-16	5.37566e-14	4.96994e-14	Ighg2b/Ighg2c/Ighg1/Ighv5-9/Ighv1-67/Ighv1-69/Ighv1-81/Ighv8-5/Ighv1-50/Ighv15-2/Ighg3/Ighv8-4/Ighv1-23/Ighv1-15/Ighv1-75/Ighv8-2/Ighv2-5	17
	GO:0002253	activation immune response	20/113	448/28943	8.64056e-16	5.37566e-14	4.96994e-14	Ighg2b/Ighg2c/Ighg1/Ighv5-9/Ighv1-67/Ighv1-69/Ighv1-81/Ighv8-5/Ighv1-50/Ighv15-2/Ighg3/Ighv8-4/Ighv1-23/Ighv1-15/C6/Ighv1-75/Ighv8-2/Cd5l/Ighv2-5/Themis3	20
	GO:0016064	immunoglobulin mediated immune response	17/113	286/28943	1.36974e-15	7.9536e-14	7.35332e-14	Ighg2b/Ighg2c/Ighg1/Ighv5-9/Ighv1-67/Ighv1-69/Ighv1-81/Ighv8-5/Ighv1-50/Ighv15-2/Ighg3/Ighv8-4/Ighv1-23/Ighv1-15/Ighv1-75/Ighv8-2/Ighv2-5	17
	GO:0019724	B cell mediated immunity	17/113	289/28943	1.62851e-15	8.86523e-14	8.19614e-14	Ighg2b/Ighg2c/Ighg1/Ighv5-9/Ighv1-67/Ighv1-69/Ighv1-81/Ighv8-5/Ighv1-50/Ighv15-2/Ighg3/Ighv8-4/Ighv1-23/Ighv1-15/Ighv1-75/Ighv8-2/Ighv2-5	17
	GO:0002429	immune response-activating cell surface receptor signaling pathway	18/113	349/28943	2.23902e-15	1.13859e-13	1.05266e-13	Ighg2b/Ighg2c/Ighg1/Ighv5-9/Ighv1-67/Ighv1-69/Ighv1-81/Ighv8-5/Ighv1-50/Ighv15-2/Ighg3/Ighv8-4/Ighv1-23/Ighv1-15/Ighv1-75/Ighv8-2/Ighv2-5/Themis3	18
	GO:0002757	immune response-activating signal transduction	18/113	350/28943	2.35301e-15	1.13859e-13	1.05266e-13	Ighg2b/Ighg2c/Ighg1/Ighv5-9/Ighv1-67/Ighv1-69/Ighv1-81/Ighv8-5/Ighv1-50/Ighv15-2/Ighg3/Ighv8-4/Ighv1-23/Ighv1-15/Ighv1-75/Ighv8-2/Ighv2-5/Themis3	18
	GO:0002768	immune response-regulating cell surface receptor signaling pathway	18/113	360/28943	3.83402e-15	1.7576e-13	1.62495e-13	Ighg2b/Ighg2c/Ighg1/Ighv5-9/Ighv1-67/Ighv1-69/Ighv1-81/Ighv8-5/Ighv1-50/Ighv15-2/Ighg3/Ighv8-4/Ighv1-23/Ighv1-15/Ighv1-75/Ighv8-2/Ighv2-5/Themis3	18
	GO:0006909	phagocytosis	18/113	390/28943	1.52434e-14	6.6385e-13	6.13748e-13	Ighg2b/Ighg2c/Ighg1/Ighv5-9/Ighv1-67/Ighv1-69/Ighv1-81/Ighv8-5/Ighv1-50/Ighv15-2/Ighg3/Ighv8-4/Ighv1-23/Ighv1-15/Ighv1-75/Ighv8-2/Alox15/Ighv2-5	18
	GO:0042113	B cell activation	18/113	440/28943	1.19587e-13	4.96001e-12	4.58567e-12	Ighg2b/Ighg2c/Ighg1/Ighv5-9/Ighv1-67/Ighv1-69/Ighv1-81/Ighv8-5/Ighv1-50/Ighv15-2/Ighg3/Ighv8-4/Ighv1-23/Ighv1-15/Ighv1-75/Ighv8-2/Ighv2-5/Gm13272	18
	GO:0051251	positive regulation of lymphocyte activation	18/113	465/28943	3.04677e-13	1.20624e-11	1.11521e-11	Ighg2b/Ighg2c/Ighg1/Ighv5-9/Ighv1-67/Ighv1-69/Ighv1-81/Ighv8-5/Ighv1-50/Ighv15-2/Ighg3/Ighv8-4/Ighv1-23/Ighv1-15/Ighv1-75/Ighv8-2/Ighv2-5/Vnn1	18
	GO:0002449	lymphocyte mediated immunity	17/113	483/28943	6.63148e-12	2.51131e-10	2.32178e-10	Ighg2b/Ighg2c/Ighg1/Ighv5-9/Ighv1-67/Ighv1-69/Ighv1-81/Ighv8-5/Ighv1-50/Ighv15-2/Ighg3/Ighv8-4/Ighv1-23/Ighv1-15/Ighv1-75/Ighv8-2/Ighv2-5	17
	GO:0002460	adaptive immune response based on somatic recombination of immune receptors built from immunoglobulin superfamily domains	17/113	486/28943	7.31081e-12	2.65321e-10	2.45297e-10	Ighg2b/Ighg2c/Ighg1/Ighv5-9/Ighv1-67/Ighv1-69/Ighv1-81/Ighv8-5/Ighv1-50/Ighv15-2/Ighg3/Ighv8-4/Ighv1-23/Ighv1-15/Ighv1-75/Ighv8-2/Ighv2-5	17
	GO:0002377	immunoglobulin production	8/113	280/28943	1.47742e-05	0.000514733	0.000475885	Igkv14-126/Igkv1-110/Ighg1/Igkv5-48/Igkv1-88/Igkv8-24/Igkv4-80/Trav6d-4	8
	GO:0002440	production of molecular mediator of immune response	8/113	422/28943	0.000257811	0.00863667	0.00798484	Igkv14-126/Igkv1-110/Ighg1/Igkv5-48/Igkv1-88/Igkv8-24/Igkv4-80/Trav6d-4	8
	GO:0051121	hepoxilin metabolic process	2/113	10/28943	0.000666118	0.020721	0.0191571	Alox15/Alox12e	2
	GO:0051122	hepoxilin biosynthetic process	2/113	10/28943	0.000666118	0.020721	0.0191571	Alox15/Alox12e	2
	GO:0019372	lipoxygenase pathway	2/113	11/28943	0.000812067	0.02439	0.0225492	Alox15/Alox12e	2
	GO:0002885	positive regulation of hypersensitivity	2/113	12/28943	0.000971996	0.0273099	0.0252488	Ighg2b/Ighg1	2
	GO:0009068	aspartate family amino acid catabolic process	2/113	12/28943	0.000971996	0.0273099	0.0252488	Gcat/Mat1a	2
	GO:0002866	positive regulation of acute inflammatory response to antigenic stimulus	2/113	14/28943	0.00133335	0.0362922	0.0335531	Ighg2b/Ighg1	2
	GO:0002883	regulation of hypersensitivity	2/113	16/28943	0.00174932	0.0461714	0.0426868	Ighg2b/Ighg1	2
	GO CC DOWN GENES
	ID	Description	Gene Ratio	Bg Ratio	P value	P Adj	q-value	Gene ID	Count
	GO:0030017	sarcomere	14/206	198/28804	1.8902e-10	3.10786e-08	2.48222e-08	Actc1/Jph1/Myoz3/Cacna1s/Ky/Myom2/Hrc/Pygm/Ak1/Ryr1/Ttn/Casq1/Tnni2/Tnnt3	14
	GO:0042383	sarcolemma	13/206	166/28804	2.41857e-10	3.10786e-08	2.48222e-08	Ghrhr/Sgcz/Slc2a5/Kcnj11/Aqp4/Cacng6/Kcnj12/Clcn1/Sgca/Cacna1s/Atp1a2/Ryr1/Casq1	13
	GO:0030016	myofibril	14/206	223/28804	9.01627e-10	7.72394e-08	6.16902e-08	Actc1/Jph1/Myoz3/Cacna1s/Ky/Myom2/Hrc/Pygm/Ak1/Ryr1/Ttn/Casq1/Tnni2/Tnnt3	14
	GO:0043292	contractile fiber	14/206	236/28804	1.88115e-09	1.20864e-07	9.65326e-08	Actc1/Jph1/Myoz3/Cacna1s/Ky/Myom2/Hrc/Pygm/Ak1/Ryr1/Ttn/Casq1/Tnni2/Tnnt3	14
	GO:0016529	sarcoplasmic reticulum	9/206	76/28804	3.86811e-09	1.98821e-07	1.58796e-07	Thbs1/Jph1/Fsd2/Cacna1s/Dhrs7c/Hrc/Pygm/Ryr1/Casq1	9
	GO:0016528	sarcoplasm	9/206	98/28804	3.73113e-08	1.41567e-06	1.13068e-06	Thbs1/Jph1/Fsd2/Cacna1s/Dhrs7c/Hrc/Pygm/Ryr1/Casq1	9
	GO:0030315	T-tubule	8/206	70/28804	3.85592e-08	1.41567e-06	1.13068e-06	Kcnj11/Aqp4/Cacng6/Kcnj12/Cacna1s/Atp1a2/Ryr1/Casq1	8
	GO:0031674	I band	10/206	144/28804	9.39328e-08	3.01759e-06	2.41012e-06	Actc1/Jph1/Myoz3/Cacna1s/Ky/Hrc/Pygm/Ryr1/Ttn/Casq1	10
	GO:1902495	transmembrane transporter complex	13/206	373/28804	3.24423e-06	9.26407e-05	7.39912e-05	Gria1/Ano2/Atp1a4/Kcnmb3/Kcng4/Best3/Kcnj11/Cacng6/Clcn1/Cacna1s/Atp1a2/Scn4a/Ryr1	13
	GO:0030018	Z disc	8/206	131/28804	4.86937e-06	0.000125143	9.99501e-05	Jph1/Myoz3/Ky/Hrc/Pygm/Ryr1/Ttn/Casq1	8
	GO:1990351	transporter complex	13/206	395/28804	6.02964e-06	0.000140874	0.000112515	Gria1/Ano2/Atp1a4/Kcnmb3/Kcng4/Best3/Kcnj11/Cacng6/Clcn1/Cacna1s/Atp1a2/Scn4a/Ryr1	13
	GO:0034702	ion channel complex	11/206	295/28804	9.99973e-06	0.000214161	0.000171048	Gria1/Ano2/Kcnmb3/Kcng4/Best3/Kcnj11/Cacng6/Clcn1/Cacna1s/Scn4a/Ryr1	11
	GO:0033017	sarcoplasmic reticulum membrane	4/206	23/28804	2.02242e-05	0.000399817	0.000319329	Jph1/Dhrs7c/Hrc/Ryr1	4
	GO:0034703	cation channel complex	8/206	224/28804	0.000221651	0.00381174	0.0030444	Gria1/Kcnmb3/Kcng4/Kcnj11/Cacng6/Cacna1s/Scn4a/Ryr1	8
	GO:0045177	apical part of cell	12/206	488/28804	0.000222475	0.00381174	0.0030444	Pkhd1/Crhr1/Cyp4f40/Umodl1/Duox2/Slc2a5/Slc22a1/Cldn1/Pip/Atp2b2/Cntfr/Slc34a2	12
	GO:0016324	apical plasma membrane	10/206	370/28804	0.000356165	0.00572091	0.00456923	Pkhd1/Cyp4f40/Umodl1/Slc2a5/Slc22a1/Cldn1/Pip/Atp2b2/Cntfr/Slc34a2	10
	GO:0005865	striated muscle thin filament	3/206	23/28804	0.000574465	0.00868455	0.00693626	Ttn/Tnni2/Tnnt3	3
	GO:0036379	myofilament	3/206	27/28804	0.000929028	0.0130404	0.0104153	Ttn/Tnni2/Tnnt3	3
	GO:0001533	cornified envelope	4/206	61/28804	0.00096408	0.0130404	0.0104153	Klk6/Serpinb2/Stfa3/S100a9	4
	GO:0099061	integral component of postsynaptic density membrane	4/206	74/28804	0.00197771	0.0254136	0.0202976	Gria1/Lrfn2/Ptprt/Atp2b2	4
	GO:0070852	cell body fiber	2/206	10/28804	0.00220562	0.0269926	0.0215587	Kcnj11/Crhr2	2
	GO:0099146	intrinsic component of postsynaptic density membrane	4/206	80/28804	0.0026296	0.0299806	0.0239452	Gria1/Lrfn2/Ptprt/Atp2b2	4
	GO:0005890	sodium:potassium-exchanging ATPase complex	2/206	11/28804	0.00268309	0.0299806	0.0239452	Atp1a4/Atp1a2	2
	GO:0043020	NADPH oxidase complex	2/206	12/28804	0.00320458	0.0343158	0.0274076	Duox2/Duox1	2
	GO:0032591	dendritic spine membrane	2/206	13/28804	0.00376946	0.03875	0.0309492	Gria1/Atp2b2	2
	GO:0090533	cation-transporting ATPase complex	2/206	14/28804	0.00437706	0.0432656	0.0345558	Atp1a4/Atp1a2	2
	GO:0030141	secretory granule	9/206	440/28804	0.00460473	0.0438302	0.0350067	Ghrhr/Pcsk1/Bpifa2/Nppc/Klk6/Ppbp/Thbs1/Prss37/Kcnj11	9
	GO:0034707	chloride channel complex	3/206	48/28804	0.00492108	0.0445476	0.0355797	Ano2/Best3/Clcn1	3
	GO:0043196	varicosity	2/206	15/28804	0.00502677	0.0445476	0.0355797	Pnmt/Crhr2	2
	GO:0098839	postsynaptic density membrane	4/206	99/28804	0.00563548	0.0474037	0.0378608	Gria1/Lrfn2/Ptprt/Atp2b2	4
	GO:0098533	ATPase dependent transmembrane transport complex	2/206	16/28804	0.00571796	0.0474037	0.0378608	Atp1a4/Atp1a2	2
	GO CC UP GENES
	ID	Description	Gene Ratio	Bg Ratio	P value	P Adj	q-value	Gene ID	Count
	GO:0019814	immunoglobulin complex	18/115	150/28804	8.58183e-22	9.35419e-20	9.12384e-20	Ighg2b/Ighg2c/Ighg1/Igkv5-48/Ighv5-9/Ighv1-67/Ighv1-69/Ighv1-81/Ighv8-5/Ighv1-50/Ighv15-2/Ighg3/Ighv8-4/Ighv1-23/Ighv1-15/Ighv1-75/Ighv8-2/Ighv2-5	18
	GO:0042571	immunoglobulin complex, circulating	17/115	139/28804	8.90503e-21	4.85324e-19	4.73373e-19	Ighg2b/Ighg2c/Ighg1/Ighv5-9/Ighv1-67/Ighv1-69/Ighv1-81/Ighv8-5/Ighv1-50/Ighv15-2/Ighg3/Ighv8-4/Ighv1-23/Ighv1-15/Ighv1-75/Ighv8-2/Ighv2-5	17
	GO:0043020	NADPH oxidase complex	2/115	12/28804	0.00101601	0.036915	0.0360059	Nox1/Nox3	2
	GO:0031983	vesicle lumen	2/115	15/28804	0.00160377	0.0437027	0.0426265	Apob/Prss57	2
	GO MF DOWN GENES
	ID	Description	Gene Ratio	Bg Ratio	P value	P Adj	q-value	Gene ID	Count
	GO:0046873	metal ion transmembrane transporter activity	17/199	422/28404	8.63296e-09	1.31606e-06	1.01542e-06	Kcnh6/Trpv1/Atp1a4/Kcnmb3/Kcng4/Atp2b3/Slc9a4/Slc22a1/Kcnj11/Atp2b2/Cacng6/Kcnj12/Cacna1s/Slc34a2/Atp1a2/Scn4a/Ryr1	17
	GO:0015267	channel activity	18/199	483/28404	1.03355e-08	1.31606e-06	1.01542e-06	Kcnh6/Gria1/Ano2/Apol10a/Clca4b/Trpv1/Gjb4/Kcnmb3/Kcng4/Best3/Kcnj11/Aqp4/Cacng6/Kcnj12/Clcn1/Cacna1s/Scn4a/Ryr1	18
	GO:0022803	passive transmembrane transporter activity	18/199	483/28404	1.03355e-08	1.31606e-06	1.01542e-06	Kcnh6/Gria1/Ano2/Apol10a/Clca4b/Trpv1/Gjb4/Kcnmb3/Kcng4/Best3/Kcnj11/Aqp4/Cacng6/Kcnj12/Clcn1/Cacna1s/Scn4a/Ryr1	18
	GO:0022836	gated channel activity	14/199	328/28404	9.16376e-08	7.27663e-06	5.61437e-06	Kcnh6/Gria1/Ano2/Clca4b/Trpv1/Kcnmb3/Kcng4/Kcnj11/Cacng6/Kcnj12/Clcn1/Cacna1s/Scn4a/Ryr1	14
	GO:0005216	ion channel activity	16/199	439/28404	9.52438e-08	7.27663e-06	5.61437e-06	Kcnh6/Gria1/Ano2/Apol10a/Clca4b/Trpv1/Kcnmb3/Kcng4/Best3/Kcnj11/Cacng6/Kcnj12/Clcn1/Cacna1s/Scn4a/Ryr1	16
	GO:0005244	voltage-gated ion channel activity	9/199	197/28404	1.11781e-05	0.000594469	0.00045867	Kcnh6/Kcng4/Kcnj11/Cacng6/Kcnj12/Clcn1/Cacna1s/Scn4a/Ryr1	9
	GO:0022832	voltage-gated channel activity	9/199	198/28404	1.16403e-05	0.000594469	0.00045867	Kcnh6/Kcng4/Kcnj11/Cacng6/Kcnj12/Clcn1/Cacna1s/Scn4a/Ryr1	9
	GO:0022853	active ion transmembrane transporter activity	10/199	252/28404	1.24496e-05	0.000594469	0.00045867	Atp1a4/Atp2b3/Slc9a4/Slc22a1/Kcnj11/Atp2b2/Slc34a2/Atp1a2/Cox8b/Cox6a2	10
	GO:0015079	potassium ion transmembrane transporter activity	8/199	157/28404	1.57981e-05	0.000656845	0.000506797	Kcnh6/Atp1a4/Kcnmb3/Kcng4/Slc9a4/Kcnj11/Kcnj12/Atp1a2	8
	GO:0042379	chemokine receptor binding	6/199	77/28404	1.71949e-05	0.000656845	0.000506797	Defb48/Ppbp/Cxcl3/Cxcl2/S100a14/Defb1	6
	GO:0005261	cation channel activity	11/199	334/28404	2.59814e-05	0.000902262	0.000696151	Kcnh6/Gria1/Trpv1/Kcnmb3/Kcng4/Kcnj11/Cacng6/Kcnj12/Cacna1s/Scn4a/Ryr1	11
	GO:0019829	ATPase-coupled cation transmembrane transporter activity	5/199	52/28404	3.19277e-05	0.00101636	0.000784188	Atp1a4/Atp2b3/Kcnj11/Atp2b2/Atp1a2	5
	GO:0015662	P-type ion transporter activity	4/199	30/28404	5.55401e-05	0.00151545	0.00116927	Atp1a4/Atp2b3/Atp2b2/Atp1a2	4
	GO:0140358	P-type transmembrane transporter activity	4/199	30/28404	5.55401e-05	0.00151545	0.00116927	Atp1a4/Atp2b3/Atp2b2/Atp1a2	4
	GO:0008528	G protein-coupled peptide receptor activity	7/199	146/28404	7.95099e-05	0.00202485	0.0015623	Ghrhr/Npy4r/Crhr1/Gpr37l1/Cxcr1/Mrgprh/Crhr2	7
	GO:0099094	ligand-gated cation channel activity	6/199	104/28404	9.41089e-05	0.00224685	0.00173359	Kcnh6/Gria1/Trpv1/Kcnj11/Kcnj12/Ryr1	6
	GO:0001653	peptide receptor activity	7/199	153/28404	0.00010663	0.00235681	0.00181842	Ghrhr/Npy4r/Crhr1/Gpr37l1/Cxcr1/Mrgprh/Crhr2	7
	GO:0015399	primary active transmembrane transporter activity	7/199	154/28404	0.000111054	0.00235681	0.00181842	Atp1a4/Atp2b3/Kcnj11/Atp2b2/Atp1a2/Cox8b/Cox6a2	7
	GO:0045236	CXCR chemokine receptor binding	3/199	15/28404	0.000144846	0.00291217	0.00224692	Ppbp/Cxcl3/Cxcl2	3
	GO:0015108	chloride transmembrane transporter activity	6/199	114/28404	0.000156111	0.00298171	0.00230058	Ano2/Apol10a/Clca4b/Best3/Slc22a1/Clcn1	6
	GO:0005254	chloride channel activity	5/199	83/28404	0.000299288	0.0054442	0.00420054	Ano2/Apol10a/Clca4b/Best3/Clcn1	5
	GO:0015085	calcium ion transmembrane transporter activity	6/199	134/28404	0.000374351	0.00620758	0.00478954	Trpv1/Atp2b3/Atp2b2/Cacng6/Cacna1s/Ryr1	6
	GO:0019842	vitamin binding	6/199	136/28404	0.000405144	0.00620758	0.00478954	Alb/Opn5/Lrat/Acaca/Gldc/Pygm	6
	GO:0008307	structural constituent of muscle	3/199	21/28404	0.000410476	0.00620758	0.00478954	Jph1/Mylpf/Ttn	3
	GO:0015276	ligand-gated ion channel activity	6/199	137/28404	0.000421265	0.00620758	0.00478954	Kcnh6/Gria1/Trpv1/Kcnj11/Kcnj12/Ryr1	6
	GO:0004252	serine-type endopeptidase activity	7/199	193/28404	0.000441354	0.00620758	0.00478954	Pcsk1/Klk6/Try5/Prss27/Prss37/Cfd/Prss1	7
	GO:0001664	G protein-coupled receptor binding	9/199	320/28404	0.000453068	0.00620758	0.00478954	Gria1/Edn2/Edn3/Defb48/Ppbp/Cxcl3/Cxcl2/S100a14/Defb1	9
	GO:0022834	ligand-gated channel activity	6/199	139/28404	0.000455006	0.00620758	0.00478954	Kcnh6/Gria1/Trpv1/Kcnj11/Kcnj12/Ryr1	6
	GO:0031420	alkali metal ion binding	3/199	22/28404	0.000472843	0.00622848	0.00480566	Kcnj11/Slc34a2/Atp1a2	3
	GO:0005253	anion channel activity	5/199	94/28404	0.000531776	0.00666617	0.00514336	Ano2/Apol10a/Clca4b/Best3/Clcn1	5
	GO:0005242	inward rectifier potassium channel activity	3/199	23/28404	0.000540972	0.00666617	0.00514336	Kcnh6/Kcnj11/Kcnj12	3
	GO:0022804	active transmembrane transporter activity	10/199	403/28404	0.000587931	0.00682947	0.00526937	Atp1a4/Atp2b3/Slc9a4/Slc22a1/Kcnj11/Atp2b2/Slc34a2/Atp1a2/Cox8b/Cox6a2	10
	GO:0015081	sodium ion transmembrane transporter activity	6/199	146/28404	0.000589981	0.00682947	0.00526937	Atp1a4/Slc9a4/Slc22a1/Slc34a2/Atp1a2/Scn4a	6
	GO:0015103	inorganic anion transmembrane transporter activity	6/199	149/28404	0.000656535	0.00737636	0.00569133	Ano2/Apol10a/Clca4b/Best3/Slc22a1/Clcn1	6
	GO:0022843	voltage-gated cation channel activity	6/199	150/28404	0.000679965	0.00742133	0.00572602	Kcnh6/Kcng4/Kcnj11/Kcnj12/Cacna1s/Ryr1	6
	GO:0008236	serine-type peptidase activity	7/199	211/28404	0.000748642	0.00794392	0.00612923	Pcsk1/Klk6/Try5/Prss27/Prss37/Cfd/Prss1	7
	GO:0017171	serine hydrolase activity	7/199	216/28404	0.000858639	0.008839	0.00681984	Pcsk1/Klk6/Try5/Prss27/Prss37/Cfd/Prss1	7
	GO:0042626	ATPase-coupled transmembrane transporter activity	5/199	105/28404	0.000879272	0.008839	0.00681984	Atp1a4/Atp2b3/Kcnj11/Atp2b2/Atp1a2	5
	GO:0072341	modified amino acid binding	5/199	108/28404	0.000998042	0.00977569	0.00754256	Alb/Gap43/Gsdmc2/Thbs1/Gsdmc	5
	GO:0001786	phosphatidylserine binding	4/199	67/28404	0.00126935	0.0121223	0.00935309	Gap43/Gsdmc2/Thbs1/Gsdmc	4
	GO:0005200	structural constituent of cytoskeleton	4/199	69/28404	0.0014162	0.0131949	0.0101807	Tuba8/Myom2/Mybpc2/Ttn	4
	GO:0005267	potassium channel activity	5/199	121/28404	0.00165453	0.0150483	0.0116107	Kcnh6/Kcnmb3/Kcng4/Kcnj11/Kcnj12	5
	GO:0005391	P-type sodium:potassium-exchanging transporter activity	2/199	10/28404	0.00211795	0.017979	0.0138719	Atp1a4/Atp1a2	2
	GO:0008554	P-type sodium transporter activity	2/199	10/28404	0.00211795	0.017979	0.0138719	Atp1a4/Atp1a2	2
	GO:0016174	NAD(P)H oxidase H2O2-forming activity	2/199	10/28404	0.00211795	0.017979	0.0138719	Duox2/Duox1	2
	GO:0005516	calmodulin binding	6/199	191/28404	0.00234114	0.0194416	0.0150004	Gap43/Trpv1/Atp2b2/Cacna1s/Ryr1/Ttn	6
	GO:0005179	hormone activity	5/199	132/28404	0.00242044	0.0196725	0.0151785	Edn2/Nppc/Rln1/Edn3/Crhr2	5
	GO:0005388	P-type calcium transporter activity	2/199	11/28404	0.00257669	0.0200876	0.0154989	Atp2b3/Atp2b2	2
	GO:0008556	P-type potassium transmembrane transporter activity	2/199	11/28404	0.00257669	0.0200876	0.0154989	Atp1a4/Atp1a2	2
	GO:0008009	chemokine activity	3/199	41/28404	0.00296841	0.0221834	0.0171159	Ppbp/Cxcl3/Cxcl2	3
	GO:0022839	ion gated channel activity	3/199	41/28404	0.00296841	0.0221834	0.0171159	Ano2/Clca4b/Kcnmb3	3
	GO:0030955	potassium ion binding	2/199	12/28404	0.0030778	0.0221834	0.0171159	Kcnj11/Atp1a2	2
	GO:0031402	sodium ion binding	2/199	12/28404	0.0030778	0.0221834	0.0171159	Slc34a2/Atp1a2	2
	GO:0034987	immunoglobulin receptor binding	5/199	141/28404	0.00321652	0.0227539	0.017556	Clec4d/Ighv9-4/Ighv1-62-3/Ighv1-39/Ighv2-4	5
	GO:0042562	hormone binding	4/199	87/28404	0.00330734	0.022971	0.0177236	Ghrhr/Crhr1/Crhr2/Atp1a2	4
	GO:0033293	monocarboxylic acid binding	4/199	93/28404	0.0041998	0.0272237	0.0210048	Alb/Cyp4f40/Lrat/Acaca	4
	GO:0005229	intracellular calcium activated chloride channel activity	2/199	14/28404	0.00420471	0.0272237	0.0210048	Ano2/Clca4b	2
	GO:0008195	phosphatidate phosphatase activity	2/199	14/28404	0.00420471	0.0272237	0.0210048	Plppr5/Plpp4	2
	GO:0061778	intracellular chloride channel activity	2/199	14/28404	0.00420471	0.0272237	0.0210048	Ano2/Clca4b	2
	GO:0005249	voltage-gated potassium channel activity	4/199	95/28404	0.00453006	0.0288414	0.0222529	Kcnh6/Kcng4/Kcnj11/Kcnj12	4
	GO:0015278	calcium-release channel activity	2/199	15/28404	0.0048293	0.0289712	0.0223531	Trpv1/Ryr1	2
	GO:0042577	lipid phosphatase activity	2/199	15/28404	0.0048293	0.0289712	0.0223531	Plppr5/Plpp4	2
	GO:0050664	oxidoreductase activity, acting on NAD(P)H, oxygen as acceptor	2/199	15/28404	0.0048293	0.0289712	0.0223531	Duox2/Duox1	2
	GO:0004175	endopeptidase activity	9/199	453/28404	0.00485381	0.0289712	0.0223531	Pcsk1/Klk6/Try5/Prss27/Adamts4/Prss37/Pip/Cfd/Prss1	9
	GO:0030170	pyridoxal phosphate binding	3/199	52/28404	0.00581727	0.0341876	0.0263779	Alb/Gldc/Pygm	3
	GO:0017046	peptide hormone binding	3/199	53/28404	0.0061349	0.0349781	0.0269878	Ghrhr/Crhr1/Crhr2	3
	GO:0070279	vitamin B6 binding	3/199	53/28404	0.0061349	0.0349781	0.0269878	Alb/Gldc/Pygm	3
	GO:0004129	cytochrome-c oxidase activity	2/199	18/28404	0.00694057	0.0389897	0.0300829	Cox8b/Cox6a2	2
	GO:0016208	AMP binding	2/199	19/28404	0.00772155	0.0421376	0.0325118	Prkag3/Pygm	2
	GO:0016675	oxidoreductase activity, acting on a heme group of donors	2/199	19/28404	0.00772155	0.0421376	0.0325118	Cox8b/Cox6a2	2
	GO:0005262	calcium channel activity	4/199	116/28404	0.00909888	0.0489545	0.0377715	Trpv1/Cacng6/Cacna1s/Ryr1	4
	GO:0031731	CCR6 chemokine receptor binding	2/199	21/28404	0.00939597	0.0498508	0.038463	Defb48/Defb1	2
	GO:0031406	carboxylic acid binding	5/199	183/28404	0.00952979	0.0498682	0.0384765	Alb/Cyp4f40/Lrat/Acaca/Gldc	5
	GO MF UP GENES
	ID	Description	Gene Ratio	Bg Ratio	P value	P Adj	q-value	Gene ID	Count
	GO:0034987	immunoglobulin receptor binding	17/107	141/28404	3.97218e-21	6.9116e-19	6.27187e-19	Ighg2b/Ighg2c/Ighg1/Ighv5-9/Ighv1-67/Ighv1-69/Ighv1-81/Ighv8-5/Ighv1-50/Ighv15-2/Ighg3/Ighv8-4/Ighv1-23/Ighv1-15/Ighv1-75/Ighv8-2/Ighv2-5	17
	GO:0003823	antigen binding	19/107	233/28404	3.16982e-20	2.75774e-18	2.50249e-18	Ighg2b/Ighg2c/Ighg1/Ighv5-9/Ighv1-67/Ighv1-69/Ighv1-81/Ighv8-5/Ighv1-50/Ighv15-2/Ighg3/Ighv8-4/Ighv1-23/Trav7-5/Ighv1-15/Ighv1-75/Ighv8-2/Trav14-3/Ighv2-5	19
	REACTOME DOWN GENES
	ID	Description	Gene Ratio	Bg Ratio	P value	P Adj	q-value	gene ID	Count
	R-MMU-397014	Muscle contraction	15/101	153/8501	2.65661e-10	7.01345e-08	6.59958e-08	Nppc/Atp1a4/Atp2b3/Actc1/Kcnj11/Atp2b2/Cacng6/Kcnj12/Atp1a2/Mylpf/Ryr1/Mybpc2/Casq1/Tnni2/Tnnt3	15
	R-MMU-5576891	Cardiac conduction	10/101	98/8501	2.10239e-07	2.77516e-05	2.61139e-05	Nppc/Atp1a4/Atp2b3/Kcnj11/Atp2b2/Cacng6/Kcnj12/Atp1a2/Ryr1/Casq1	10
	R-MMU-5578775	Ion homeostasis	7/101	52/8501	2.33995e-06	0.000205915	0.000193764	Atp1a4/Atp2b3/Kcnj11/Atp2b2/Atp1a2/Ryr1/Casq1	7
	R-MMU-983712	Ion channel transport	11/101	169/8501	4.68191e-06	0.000309006	0.000290771	Ano2/Clca4b/Trpv1/Atp1a4/Atp2b3/Best3/Atp2b2/Clcn1/Atp1a2/Ryr1/Casq1	11
	R-MMU-209776	Metabolism of amine-derived hormones	4/101	16/8501	3.06156e-05	0.00161651	0.00152111	Duox2/Dio2/Pnmt/Duox1	4
	R-MMU-2672351	Stimuli-sensing channels	7/101	95/8501	0.00012741	0.00560602	0.00527521	Ano2/Clca4b/Trpv1/Best3/Clcn1/Ryr1/Casq1	7
	R-MMU-500792	GPCR ligand binding	14/101	392/8501	0.000204257	0.00770342	0.00724883	Ghrhr/Npy4r/Opn5/Edn2/Crhr1/Drd4/Plppr5/Gpr37l1/Edn3/Cxcr1/Ppbp/Cxcl3/Cxcl2/Crhr2	14
	R-MMU-390522	Striated Muscle Contraction	4/101	32/8501	0.000522768	0.0172513	0.0162333	Actc1/Mybpc2/Tnni2/Tnnt3	4
	R-MMU-6803157	Antimicrobial peptides	6/101	90/8501	0.000673994	0.0197705	0.0186038	Bpifa2/Try5/Defb48/Prss1/S100a9/Defb1	6
	R-MMU-373076	Class A/1 (Rhodopsin-like receptors)	11/101	307/8501	0.000998322	0.0263557	0.0248004	Npy4r/Opn5/Edn2/Drd4/Plppr5/Gpr37l1/Edn3/Cxcr1/Ppbp/Cxcl3/Cxcl2	11
	R-MMU-375276	Peptide ligand-binding receptors	8/101	186/8501	0.00161112	0.0386668	0.036385	Npy4r/Edn2/Gpr37l1/Edn3/Cxcr1/Ppbp/Cxcl3/Cxcl2	8
	R-MMU-1461973	Defensins	4/101	52/8501	0.00328277	0.0710184	0.0668275	Try5/Defb48/Prss1/Defb1	4
	R-MMU-380108	Chemokine receptors bind chemokines	4/101	54/8501	0.00376613	0.0710184	0.0668275	Cxcr1/Ppbp/Cxcl3/Cxcl2	4
	R-MMU-936837	Ion transport by P-type ATPases	4/101	54/8501	0.00376613	0.0710184	0.0668275	Atp1a4/Atp2b3/Atp2b2/Atp1a2	4
	R-MMU-1296071	Potassium Channels	5/101	96/8501	0.00558024	0.0982123	0.0924166	Kcnh6/Kcnmb3/Kcng4/Kcnj11/Kcnj12	5
	REACTOME UP GENES
	Not found
	WikiPathways DOWN GENES
	ID	Description	GeneRatio	BgRatio	pvalue	P Adj	qvalue	geneID	Count
	WP553	Calcium regulation in cardiac cells	7/57	144/4560	0.00190673	0.0771102	0.0722908	Nuf2 (14621), Znf783 (27222), Atp2b3 (320707), Gjb4 (11941), Cacna1s (12292), Ryr1 (20190), Tshb2 (12372)	7
	WP456	GPCRs, class B secretin-like	3/57	22/4560	0.00240969	0.0771102	0.0722908	Ghrhr (14602), Crhr1 (12921), Crhr2 (12922)	3
	WikiPathways UP GENES
	ID	Description	GeneRatio	BgRatio	pvalue	P Adj	qvalue	geneID	Count
	WP435	One-carbon metabolism	2/11	29/4560	0.00207319	0.023876	0.0146607	Mat1a (11720), Folh1 (53320)	2
	WP1251	Metapathway biotransformation	3/11	141/4560	0.00397933	0.023876	0.0146607	Nat8 (68396), Hs3st2 (195646), Chst9 (71367)	3
	WP1770	One-carbon metabolism and related pathways	2/11	52/4560	0.00656901	0.026276	0.0161344	Agxt2 (268782), Mat1a (11720)	2
