# Supplementary material for: Cabergoline as a Novel Strategy for Post-Pregnancy Breast Cancer Prevention in Mice and Human
Source: Research Square preprint supplement (doi:10.21203/rs.3.rs-3854490/v1), 2024-02-05
Supplement: Supplementary file 2 [file 29660e501a32dc97de8d6bde.xlsx]

## Sheet: Supplementary_Table_S5
	GO BP DOWN GENES
	ID	Description	Gene Ratio	Bg Ratio	P value	P Adj	q value	Gene ID	Count
	GO:0006874	cellular calcium ion homeostasis	11/207	292/28943	9.09662e-06	0.00111737	0.000969774	Pkhd1/Edn2/Edn3/Atp2b3/Atp2b2/Sypl2/Dhrs7c/Hrc/Pygm/Ryr1/Casq1	11
	GO:0006813	potassium ion transport	10/207	244/28943	1.12939e-05	0.00131426	0.00114066	Kcnh6/Atp1a4/Edn3/Kcnmb3/Kcng4/Slc9a4/Kcnj11/Kcnj12/Atp1a2/Scn4a	10
	GO:0006875	cellular metal ion homeostasis	13/207	425/28943	1.31593e-05	0.00140091	0.00121586	Pkhd1/Edn2/Atp1a4/Edn3/Atp2b3/Atp2b2/Sypl2/Dhrs7c/Atp1a2/Hrc/Pygm/Ryr1/Casq1	13
	GO:0098739	import across plasma membrane	9/207	198/28943	1.37566e-05	0.00140091	0.00121586	Trpv1/Atp1a4/Slc2a5/Slc9a4/Thbs1/Kcnj11/Kcnj12/Cacna1s/Atp1a2	9
	GO:0098657	import into cell	10/207	250/28943	1.39394e-05	0.00140091	0.00121586	Trpv1/Atp1a4/Slc2a5/Slc9a4/Slc22a1/Thbs1/Kcnj11/Kcnj12/Cacna1s/Atp1a2	10
	GO:0030003	cellular cation homeostasis	14/207	498/28943	1.56962e-05	0.00150888	0.00130957	Pkhd1/Edn2/Atp1a4/Edn3/Atp2b3/Slc9a4/Atp2b2/Sypl2/Dhrs7c/Atp1a2/Hrc/Pygm/Ryr1/Casq1	14
	GO:0072503	cellular divalent inorganic cation homeostasis	11/207	320/28943	2.12966e-05	0.00187196	0.00162469	Pkhd1/Edn2/Edn3/Atp2b3/Atp2b2/Sypl2/Dhrs7c/Hrc/Pygm/Ryr1/Casq1	11
	GO:0006816	calcium ion transport	13/207	449/28943	2.33775e-05	0.00187196	0.00162469	Drd4/Trpv1/Atp2b3/Plpp4/Atp2b2/Cacng6/Crhr2/Cacna1s/Dhrs7c/Atp1a2/Hrc/Ryr1/Casq1	13
	GO:0055074	calcium ion homeostasis	11/207	324/28943	2.38694e-05	0.00187196	0.00162469	Pkhd1/Edn2/Edn3/Atp2b3/Atp2b2/Sypl2/Dhrs7c/Hrc/Pygm/Ryr1/Casq1	11
	GO:0070588	calcium ion transmembrane transport	11/207	325/28943	2.4553e-05	0.00187196	0.00162469	Drd4/Trpv1/Atp2b3/Atp2b2/Cacng6/Cacna1s/Dhrs7c/Atp1a2/Hrc/Ryr1/Casq1	11
	GO:0014808	release of sequestered calcium ion into cytosol by sarcoplasmic reticulum	4/207	25/28943	2.85766e-05	0.00193673	0.0016809	Dhrs7c/Hrc/Ryr1/Casq1	4
	GO:0098659	inorganic cation import across plasma membrane	7/207	122/28943	2.89064e-05	0.00193673	0.0016809	Trpv1/Atp1a4/Slc9a4/Kcnj11/Kcnj12/Cacna1s/Atp1a2	7
	GO:0099587	inorganic ion import across plasma membrane	7/207	122/28943	2.89064e-05	0.00193673	0.0016809	Trpv1/Atp1a4/Slc9a4/Kcnj11/Kcnj12/Cacna1s/Atp1a2	7
	GO:1903514	release of sequestered calcium ion into cytosol by endoplasmic reticulum	4/207	26/28943	3.35836e-05	0.00218392	0.00189545	Dhrs7c/Hrc/Ryr1/Casq1	4
	GO:0072507	divalent inorganic cation homeostasis	11/207	359/28943	6.04155e-05	0.00366956	0.00318485	Pkhd1/Edn2/Edn3/Atp2b3/Atp2b2/Sypl2/Dhrs7c/Hrc/Pygm/Ryr1/Casq1	11
	GO:0070296	sarcoplasmic reticulum calcium ion transport	4/207	32/28943	7.8112e-05	0.00422389	0.00366595	Dhrs7c/Hrc/Ryr1/Casq1	4
	GO:0071805	potassium ion transmembrane transport	8/207	207/28943	0.000129392	0.00635745	0.00551769	Kcnh6/Atp1a4/Edn3/Kcng4/Slc9a4/Kcnj11/Kcnj12/Atp1a2	8
	GO:0051924	regulation of calcium ion transport	9/207	296/28943	0.000299574	0.0116635	0.0101229	Drd4/Plpp4/Atp2b2/Cacng6/Crhr2/Dhrs7c/Atp1a2/Hrc/Casq1	9
	GO:1990573	potassium ion import across plasma membrane	4/207	48/28943	0.000386533	0.0135655	0.0117736	Atp1a4/Kcnj11/Kcnj12/Atp1a2	4
	GO:0010959	regulation of metal ion transport	11/207	458/28943	0.000493997	0.0168035	0.0145839	Drd4/Edn3/Plpp4/Atp2b2/Cacng6/Crhr2/Nkain1/Dhrs7c/Atp1a2/Hrc/Casq1	11
	GO:0010880	regulation of release of sequestered calcium ion into cytosol by sarcoplasmic reticulum	3/207	23/28943	0.000574548	0.0186813	0.0162136	Dhrs7c/Hrc/Casq1	3
	GO:0051480	regulation of cytosolic calcium ion concentration	4/207	55/28943	0.000651594	0.0203405	0.0176537	Atp2b3/Atp2b2/Hrc/Ryr1	4
	GO:0051926	negative regulation of calcium ion transport	4/207	76/28943	0.00218135	0.0474662	0.0411963	Drd4/Crhr2/Atp1a2/Hrc	4
	GO:0097553	calcium ion transmembrane import into cytosol	6/207	185/28943	0.00221442	0.0474662	0.0411963	Trpv1/Cacna1s/Dhrs7c/Hrc/Ryr1/Casq1	6
	GO:0006814	sodium ion transport	7/207	250/28943	0.00223269	0.0474662	0.0411963	Drd4/Atp1a4/Slc9a4/Nkain1/Slc34a2/Atp1a2/Scn4a	7
	GO:0055075	potassium ion homeostasis	3/207	37/28943	0.00234199	0.0488503	0.0423976	Atp1a4/Slc9a4/Atp1a2	3
	GO CC DOWN GENES
	ID	Description	Gene Ratio	Bg Ratio	P value	P Adj	q value	Gene ID	Count
	GO:1902495	transmembrane transporter complex	13/206	373/28804	3.24423e-06	9.26407e-05	7.39912e-05	Gria1/Ano2/Atp1a4/Kcnmb3/Kcng4/Best3/Kcnj11/Cacng6/Clcn1/Cacna1s/Atp1a2/Scn4a/Ryr1	13
	GO:1990351	transporter complex	13/206	395/28804	6.02964e-06	0.000140874	0.000112515	Gria1/Ano2/Atp1a4/Kcnmb3/Kcng4/Best3/Kcnj11/Cacng6/Clcn1/Cacna1s/Atp1a2/Scn4a/Ryr1	13
	GO:0034702	ion channel complex	11/206	295/28804	9.99973e-06	0.000214161	0.000171048	Gria1/Ano2/Kcnmb3/Kcng4/Best3/Kcnj11/Cacng6/Clcn1/Cacna1s/Scn4a/Ryr1	11
	GO:0034703	cation channel complex	8/206	224/28804	0.000221651	0.00381174	0.0030444	Gria1/Kcnmb3/Kcng4/Kcnj11/Cacng6/Cacna1s/Scn4a/Ryr1	8
	GO:0005890	sodium:potassium-exchanging ATPase complex	2/206	11/28804	0.00268309	0.0299806	0.0239452	Atp1a4/Atp1a2	2
	GO:0090533	cation-transporting ATPase complex	2/206	14/28804	0.00437706	0.0432656	0.0345558	Atp1a4/Atp1a2	2
	GO:0034707	chloride channel complex	3/206	48/28804	0.00492108	0.0445476	0.0355797	Ano2/Best3/Clcn1	3
	GO:0098533	ATPase dependent transmembrane transport complex	2/206	16/28804	0.00571796	0.0474037	0.0378608	Atp1a4/Atp1a2	2
	GO MF DOWN GENES
	ID	Description	Gene Ratio	Bg Ratio	P value	P Adj	q value	Gene ID	Count
	GO:0046873	metal ion transmembrane transporter activity	17/199	422/28404	8.63296e-09	1.31606e-06	1.01542e-06	Kcnh6/Trpv1/Atp1a4/Kcnmb3/Kcng4/Atp2b3/Slc9a4/Slc22a1/Kcnj11/Atp2b2/Cacng6/Kcnj12/Cacna1s/Slc34a2/Atp1a2/Scn4a/Ryr1	17
	GO:0015267	channel activity	18/199	483/28404	1.03355e-08	1.31606e-06	1.01542e-06	Kcnh6/Gria1/Ano2/Apol10a/Clca4b/Trpv1/Gjb4/Kcnmb3/Kcng4/Best3/Kcnj11/Aqp4/Cacng6/Kcnj12/Clcn1/Cacna1s/Scn4a/Ryr1	18
	GO:0022803	passive transmembrane transporter activity	18/199	483/28404	1.03355e-08	1.31606e-06	1.01542e-06	Kcnh6/Gria1/Ano2/Apol10a/Clca4b/Trpv1/Gjb4/Kcnmb3/Kcng4/Best3/Kcnj11/Aqp4/Cacng6/Kcnj12/Clcn1/Cacna1s/Scn4a/Ryr1	18
	GO:0022836	gated channel activity	14/199	328/28404	9.16376e-08	7.27663e-06	5.61437e-06	Kcnh6/Gria1/Ano2/Clca4b/Trpv1/Kcnmb3/Kcng4/Kcnj11/Cacng6/Kcnj12/Clcn1/Cacna1s/Scn4a/Ryr1	14
	GO:0005216	ion channel activity	16/199	439/28404	9.52438e-08	7.27663e-06	5.61437e-06	Kcnh6/Gria1/Ano2/Apol10a/Clca4b/Trpv1/Kcnmb3/Kcng4/Best3/Kcnj11/Cacng6/Kcnj12/Clcn1/Cacna1s/Scn4a/Ryr1	16
	GO:0005244	voltage-gated ion channel activity	9/199	197/28404	1.11781e-05	0.000594469	0.00045867	Kcnh6/Kcng4/Kcnj11/Cacng6/Kcnj12/Clcn1/Cacna1s/Scn4a/Ryr1	9
	GO:0022832	voltage-gated channel activity	9/199	198/28404	1.16403e-05	0.000594469	0.00045867	Kcnh6/Kcng4/Kcnj11/Cacng6/Kcnj12/Clcn1/Cacna1s/Scn4a/Ryr1	9
	GO:0022853	active ion transmembrane transporter activity	10/199	252/28404	1.24496e-05	0.000594469	0.00045867	Atp1a4/Atp2b3/Slc9a4/Slc22a1/Kcnj11/Atp2b2/Slc34a2/Atp1a2/Cox8b/Cox6a2	10
	GO:0015079	potassium ion transmembrane transporter activity	8/199	157/28404	1.57981e-05	0.000656845	0.000506797	Kcnh6/Atp1a4/Kcnmb3/Kcng4/Slc9a4/Kcnj11/Kcnj12/Atp1a2	8
	GO:0005261	cation channel activity	11/199	334/28404	2.59814e-05	0.000902262	0.000696151	Kcnh6/Gria1/Trpv1/Kcnmb3/Kcng4/Kcnj11/Cacng6/Kcnj12/Cacna1s/Scn4a/Ryr1	11
	GO:0019829	ATPase-coupled cation transmembrane transporter activity	5/199	52/28404	3.19277e-05	0.00101636	0.000784188	Atp1a4/Atp2b3/Kcnj11/Atp2b2/Atp1a2	5
	GO:0015662	P-type ion transporter activity	4/199	30/28404	5.55401e-05	0.00151545	0.00116927	Atp1a4/Atp2b3/Atp2b2/Atp1a2	4
	GO:0140358	P-type transmembrane transporter activity	4/199	30/28404	5.55401e-05	0.00151545	0.00116927	Atp1a4/Atp2b3/Atp2b2/Atp1a2	4
	GO:0008528	G protein-coupled peptide receptor activity	7/199	146/28404	7.95099e-05	0.00202485	0.0015623	Ghrhr/Npy4r/Crhr1/Gpr37l1/Cxcr1/Mrgprh/Crhr2	7
	GO:0099094	ligand-gated cation channel activity	6/199	104/28404	9.41089e-05	0.00224685	0.00173359	Kcnh6/Gria1/Trpv1/Kcnj11/Kcnj12/Ryr1	6
	GO:0015399	primary active transmembrane transporter activity	7/199	154/28404	0.000111054	0.00235681	0.00181842	Atp1a4/Atp2b3/Kcnj11/Atp2b2/Atp1a2/Cox8b/Cox6a2	7
	GO:0015108	chloride transmembrane transporter activity	6/199	114/28404	0.000156111	0.00298171	0.00230058	Ano2/Apol10a/Clca4b/Best3/Slc22a1/Clcn1	6
	GO:0005254	chloride channel activity	5/199	83/28404	0.000299288	0.0054442	0.00420054	Ano2/Apol10a/Clca4b/Best3/Clcn1	5
	GO:0015085	calcium ion transmembrane transporter activity	6/199	134/28404	0.000374351	0.00620758	0.00478954	Trpv1/Atp2b3/Atp2b2/Cacng6/Cacna1s/Ryr1	6
	GO:0015276	ligand-gated ion channel activity	6/199	137/28404	0.000421265	0.00620758	0.00478954	Kcnh6/Gria1/Trpv1/Kcnj11/Kcnj12/Ryr1	6
	GO:0022834	ligand-gated channel activity	6/199	139/28404	0.000455006	0.00620758	0.00478954	Kcnh6/Gria1/Trpv1/Kcnj11/Kcnj12/Ryr1	6
	GO:0005242	inward rectifier potassium channel activity	3/199	23/28404	0.000540972	0.00666617	0.00514336	Kcnh6/Kcnj11/Kcnj12	3
	GO:0022804	active transmembrane transporter activity	10/199	403/28404	0.000587931	0.00682947	0.00526937	Atp1a4/Atp2b3/Slc9a4/Slc22a1/Kcnj11/Atp2b2/Slc34a2/Atp1a2/Cox8b/Cox6a2	10
	GO:0015081	sodium ion transmembrane transporter activity	6/199	146/28404	0.000589981	0.00682947	0.00526937	Atp1a4/Slc9a4/Slc22a1/Slc34a2/Atp1a2/Scn4a	6
	GO:0015103	inorganic anion transmembrane transporter activity	6/199	149/28404	0.000656535	0.00737636	0.00569133	Ano2/Apol10a/Clca4b/Best3/Slc22a1/Clcn1	6
	GO:0022843	voltage-gated cation channel activity	6/199	150/28404	0.000679965	0.00742133	0.00572602	Kcnh6/Kcng4/Kcnj11/Kcnj12/Cacna1s/Ryr1	6
	GO:0005267	potassium channel activity	5/199	121/28404	0.00165453	0.0150483	0.0116107	Kcnh6/Kcnmb3/Kcng4/Kcnj11/Kcnj12	5
	GO:0005391	P-type sodium:potassium-exchanging transporter activity	2/199	10/28404	0.00211795	0.017979	0.0138719	Atp1a4/Atp1a2	2
	GO:0008554	P-type sodium transporter activity	2/199	10/28404	0.00211795	0.017979	0.0138719	Atp1a4/Atp1a2	2
	GO:0005388	P-type calcium transporter activity	2/199	11/28404	0.00257669	0.0200876	0.0154989	Atp2b3/Atp2b2	2
	GO:0008556	P-type potassium transmembrane transporter activity	2/199	11/28404	0.00257669	0.0200876	0.0154989	Atp1a4/Atp1a2	2
	GO:0022839	ion gated channel activity	3/199	41/28404	0.00296841	0.0221834	0.0171159	Ano2/Clca4b/Kcnmb3	3
	GO:0030955	potassium ion binding	2/199	12/28404	0.0030778	0.0221834	0.0171159	Kcnj11/Atp1a2	2
	GO:0031402	sodium ion binding	2/199	12/28404	0.0030778	0.0221834	0.0171159	Slc34a2/Atp1a2	2
	GO:0005229	intracellular calcium activated chloride channel activity	2/199	14/28404	0.00420471	0.0272237	0.0210048	Ano2/Clca4b	2
	GO:0005249	voltage-gated potassium channel activity	4/199	95/28404	0.00453006	0.0288414	0.0222529	Kcnh6/Kcng4/Kcnj11/Kcnj12	4
	GO:0015278	calcium-release channel activity	2/199	15/28404	0.0048293	0.0289712	0.0223531	Trpv1/Ryr1	2
	GO:0005262	calcium channel activity	4/199	116/28404	0.00909888	0.0489545	0.0377715	Trpv1/Cacng6/Cacna1s/Ryr1	4
	REACTOME DOWN GENES
	ID	Description	Gene Ratio	Bg Ratio	P value	P Adj	q value	Gene ID	Count
	R-MMU-5578775	Ion homeostasis	7/101	52/8501	2.33995e-06	0.000205915	0.000193764	Atp1a4/Atp2b3/Kcnj11/Atp2b2/Atp1a2/Ryr1/Casq1	7
	R-MMU-983712	Ion channel transport	11/101	169/8501	4.68191e-06	0.000309006	0.000290771	Ano2/Clca4b/Trpv1/Atp1a4/Atp2b3/Best3/Atp2b2/Clcn1/Atp1a2/Ryr1/Casq1	11
	R-MMU-2672351	Stimuli-sensing channels	7/101	95/8501	0.00012741	0.00560602	0.00527521	Ano2/Clca4b/Trpv1/Best3/Clcn1/Ryr1/Casq1	7
	R-MMU-936837	Ion transport by P-type ATPases	4/101	54/8501	0.00376613	0.0710184	0.0668275	Atp1a4/Atp2b3/Atp2b2/Atp1a2	4
	R-MMU-1296071	Potassium Channels	5/101	96/8501	0.00558024	0.0982123	0.0924166	Kcnh6/Kcnmb3/Kcng4/Kcnj11/Kcnj12	5
