# Supplementary material for: Cabergoline as a Novel Strategy for Post-Pregnancy Breast Cancer Prevention in Mice and Human
Source: Research Square preprint supplement (doi:10.21203/rs.3.rs-3854490/v1), 2024-02-05
Supplement: Supplementary file 3 [file 436ac9590f68e2925f6f17b9.xlsx]

## Sheet: Supplementary Table S12
	Cluster name	ID	Description	Gene Ratio	Bg Ratio	P value	P Adj	q value	Gene ID	Count
	Sensitivity to TFNα-related and others	GO:0034694	response to prostaglandin	2/78	22/28943	0.00159931	0.0328491	0.024034	Ccl21b/Ccl19	2
		GO:0032869	cellular response to insulin stimulus	4/78	212/28943	0.00261407	0.0425058	0.0310994	Ahsg/Lep/Adipoq/Otop1	4
		GO:0032868	response to insulin	5/78	250/28943	0.000583666	0.0171906	0.0125775	Ahsg/Lep/Adipoq/Otop1/Rbp4	5
		GO:0034695	response to prostaglandin E	2/78	20/28943	0.00132005	0.0286195	0.0209395	Ccl21b/Ccl19	2
		GO:0071356	cellular response to tumor necrosis factor	4/78	183/28943	0.00153211	0.0323481	0.0236675	Ccl21b/Adipoq/Gpd1/Ccl19	4
		GO:0032680	regulation of tumor necrosis factor production	4/78	186/28943	0.00162605	0.0329644	0.0241184	Lep/Adipoq/Ccl19/Cidea	4
		GO:1903555	regulation of tumor necrosis factor superfamily cytokine production	4/78	189/28943	0.00172391	0.0336978	0.024655	Lep/Adipoq/Ccl19/Cidea	4
		GO:0032640	tumor necrosis factor production	4/78	193/28943	0.00186067	0.0349703	0.025586	Lep/Adipoq/Ccl19/Cidea	4
		GO:0071706	tumor necrosis factor superfamily cytokine production	4/78	196/28943	0.00196805	0.0353119	0.0258359	Lep/Adipoq/Ccl19/Cidea	4
		GO:0034612	response to tumor necrosis factor	4/78	202/28943	0.00219556	0.038475	0.0281503	Ccl21b/Adipoq/Gpd1/Ccl19	4
		GO:0043552	positive regulation of phosphatidylinositol 3-kinase activity	2/78	31/28943	0.00316926	0.0475694	0.0348041	Ccl21b/Ccl19	2
	Inflammatory response-related	GO:0001906	cell killing	6/78	273/28943	9.69554e-05	0.00432421	0.00316381	Ccl21b/Clec12b/H2-M11/Lep/Kng2/Ccl19	6
		GO:0097048	dendritic cell apoptotic process	2/78	13/28943	0.000548587	0.0164681	0.0120489	Ccl21b/Ccl19	2
		GO:2000668	regulation of dendritic cell apoptotic process	2/78	13/28943	0.000548587	0.0164681	0.0120489	Ccl21b/Ccl19	2
		GO:0001767	establishment of lymphocyte polarity	2/78	14/28943	0.0006389	0.0181331	0.0132671	Ccl21b/Ccl19	2
		GO:0001768	establishment of T cell polarity	2/78	14/28943	0.0006389	0.0181331	0.0132671	Ccl21b/Ccl19	2
		GO:0002377	immunoglobulin production	5/78	280/28943	0.000970439	0.0247324	0.0180955	Ighe/Igkv9-123/Igkv4-72/Igkv12-98/Rbp4	5
		GO:0002407	dendritic cell chemotaxis	2/78	20/28943	0.00132005	0.0286195	0.0209395	Ccl21b/Ccl19	2
		GO:0031640	killing of cells of another organism	3/78	94/28943	0.00211608	0.0375363	0.0274635	Ccl21b/Kng2/Ccl19	3
		GO:0036336	dendritic cell migration	2/78	27/28943	0.00240902	0.0408748	0.029906	Ccl21b/Ccl19	2
		GO:0090023	positive regulation of neutrophil chemotaxis	2/78	29/28943	0.0027768	0.0437837	0.0320343	Ccl21b/Ccl19	2
		GO:0071624	positive regulation of granulocyte chemotaxis	2/78	31/28943	0.00316926	0.0475694	0.0348041	Ccl21b/Ccl19	2
		GO:0043434	response to peptide hormone	5/78	369/28943	0.00323359	0.0476193	0.0348406	Ahsg/Lep/Adipoq/Otop1/Rbp4	5
		GO:0071346	cellular response to interferon-gamma	3/78	112/28943	0.00347551	0.0480112	0.0351274	Ccl21b/Otop1/Ccl19	3
	Response to insulin and IGF1 -related	R-MMU-190322	FGFR4 ligand binding and activation	2/32	14/8501	0.00121451	0.0293593	0.0206031	Fgf17/Klb	2
		R-MMU-5654228	Phospholipase C-mediated cascade; FGFR4	2/32	15/8501	0.00139806	0.0293593	0.0206031	Fgf17/Klb	2
		R-MMU-5654719	SHC-mediated cascade:FGFR4	2/32	19/8501	0.00225556	0.0385981	0.0270864	Fgf17/Klb	2
		R-MMU-5654720	PI-3K cascade:FGFR4	2/32	20/8501	0.0025003	0.0385981	0.0270864	Fgf17/Klb	2
		R-MMU-5654712	FRS-mediated FGFR4 signaling	2/32	21/8501	0.00275701	0.0385981	0.0270864	Fgf17/Klb	2
		R-MMU-5654716	Downstream signaling of activated FGFR4	2/32	26/8501	0.00421705	0.0531348	0.0372876	Fgf17/Klb	2
		R-MMU-5654733	Negative regulation of FGFR4 signaling	2/32	31/8501	0.00596335	0.0683074	0.047935	Fgf17/Klb	2
		R-MMU-5654743	Signaling by FGFR4	2/32	40/8501	0.00979461	0.0903951	0.0634352	Fgf17/Klb	2
		R-MMU-109704	PI3K Cascade	2/32	41/8501	0.0102729	0.0903951	0.0634352	Fgf17/Klb	2
		R-MMU-112399	IRS-mediated signalling	2/32	42/8501	0.0107613	0.0903951	0.0634352	Fgf17/Klb	2
		R-MMU-2428928	IRS-related events triggered by IGF1R	2/32	46/8501	0.0128158	0.0921945	0.0646979	Fgf17/Klb	2
		R-MMU-2428924	IGF1R signaling cascade	2/32	47/8501	0.0133542	0.0921945	0.0646979	Fgf17/Klb	2
		R-MMU-2404192	Signaling by Type 1 Insulin-like Growth Factor 1 Receptor (IGF1R)	2/32	48/8501	0.0139023	0.0921945	0.0646979	Fgf17/Klb	2
		R-MMU-74751	Insulin receptor signalling cascade	2/32	48/8501	0.0139023	0.0921945	0.0646979	Fgf17/Klb	2
