# Supplementary material for: Cabergoline as a Novel Strategy for Post-Pregnancy Breast Cancer Prevention in Mice and Human
Source: Research Square preprint supplement (doi:10.21203/rs.3.rs-3854490/v1), 2024-02-05
Supplement: Supplementary file 4 [file 4f76a78f483ed2ddd0a07971.xlsx]

## Sheet: Supplementary_Table_S2
	GO BP DOWN GENES
	ID	Description	Gene Ratio	Bg Ratio	P value	P Adj	q value	Gene ID	Count
	GO:1902093	positive regulation of flagellated sperm motility	1/5	15/28943	0.00258879	0.0447817	0.0151802	Defb1	1
	GO:2000155	positive regulation of cilium-dependent cell motility	1/5	15/28943	0.00258879	0.0447817	0.0151802	Defb1	1
	GO:0003353	positive regulation of cilium movement	1/5	16/28943	0.00276119	0.0447817	0.0151802	Defb1	1
	GO:0035584	calcium-mediated signaling using intracellular calcium source	1/5	21/28943	0.00362281	0.0447817	0.0151802	Defb1	1
	GO:1901317	regulation of flagellated sperm motility	1/5	22/28943	0.00379506	0.0447817	0.0151802	Defb1	1
	GO:0060295	regulation of cilium movement involved in cell motility	1/5	31/28943	0.00534426	0.0450445	0.0152693	Defb1	1
	GO:1902019	regulation of cilium-dependent cell motility	1/5	31/28943	0.00534426	0.0450445	0.0152693	Defb1	1
	GO:0048240	sperm capacitation	1/5	36/28943	0.0062041	0.0457552	0.0155102	Defb1	1
	GO:0003352	regulation of cilium movement	1/5	42/28943	0.00723511	0.0474302	0.016078	Defb1	1
	GO BP UP GENES
	ID	Description	Gene Ratio	Bg Ratio	P value	P Adj	q value	Gene ID	Count
	GO:0006958	complement activation, classical pathway	4/8	167/28943	7.3506e-08	1.89286e-06	5.11583e-07	Ighg2b/Ighg2c/Ighv5-9/Ighv1-81	4
	GO:0006910	phagocytosis, recognition	4/8	170/28943	7.89563e-08	1.89286e-06	5.11583e-07	Ighg2b/Ighg2c/Ighv5-9/Ighv1-81	4
	GO:0050853	B cell receptor signaling pathway	4/8	182/28943	1.0383e-07	1.89286e-06	5.11583e-07	Ighg2b/Ighg2c/Ighv5-9/Ighv1-81	4
	GO:0002455	humoral immune response mediated by circulating immunoglobulin	4/8	183/28943	1.06138e-07	1.89286e-06	5.11583e-07	Ighg2b/Ighg2c/Ighv5-9/Ighv1-81	4
	GO:0006956	complement activation	4/8	193/28943	1.3139e-07	1.89286e-06	5.11583e-07	Ighg2b/Ighg2c/Ighv5-9/Ighv1-81	4
	GO:0006911	phagocytosis, engulfment	4/8	201/28943	1.54623e-07	1.89286e-06	5.11583e-07	Ighg2b/Ighg2c/Ighv5-9/Ighv1-81	4
	GO:0099024	plasma membrane invagination	4/8	210/28943	1.84287e-07	1.89286e-06	5.11583e-07	Ighg2b/Ighg2c/Ighv5-9/Ighv1-81	4
	GO:0010324	membrane invagination	4/8	218/28943	2.14051e-07	1.89286e-06	5.11583e-07	Ighg2b/Ighg2c/Ighv5-9/Ighv1-81	4
	GO:0050871	positive regulation of B cell activation	4/8	222/28943	2.30212e-07	1.89286e-06	5.11583e-07	Ighg2b/Ighg2c/Ighv5-9/Ighv1-81	4
	GO:0050864	regulation of B cell activation	4/8	278/28943	5.65689e-07	4.07257e-06	1.10069e-06	Ighg2b/Ighg2c/Ighv5-9/Ighv1-81	4
	GO:0016064	immunoglobulin mediated immune response	4/8	286/28943	6.3349e-07	4.07257e-06	1.10069e-06	Ighg2b/Ighg2c/Ighv5-9/Ighv1-81	4
	GO:0019724	B cell mediated immunity	4/8	289/28943	6.60416e-07	4.07257e-06	1.10069e-06	Ighg2b/Ighg2c/Ighv5-9/Ighv1-81	4
	GO:0008037	cell recognition	4/8	302/28943	7.87076e-07	4.44166e-06	1.20045e-06	Ighg2b/Ighg2c/Ighv5-9/Ighv1-81	4
	GO:0050851	antigen receptor-mediated signaling pathway	4/8	307/28943	8.40315e-07	4.44166e-06	1.20045e-06	Ighg2b/Ighg2c/Ighv5-9/Ighv1-81	4
	GO:0002429	immune response-activating cell surface receptor signaling pathway	4/8	349/28943	1.40019e-06	6.55e-06	1.77027e-06	Ighg2b/Ighg2c/Ighv5-9/Ighv1-81	4
	GO:0002757	immune response-activating signal transduction	4/8	350/28943	1.41622e-06	6.55e-06	1.77027e-06	Ighg2b/Ighg2c/Ighv5-9/Ighv1-81	4
	GO:0002768	immune response-regulating cell surface receptor signaling pathway	4/8	360/28943	1.58413e-06	6.89563e-06	1.86368e-06	Ighg2b/Ighg2c/Ighv5-9/Ighv1-81	4
	GO:0006909	phagocytosis	4/8	390/28943	2.17744e-06	8.9517e-06	2.41938e-06	Ighg2b/Ighg2c/Ighv5-9/Ighv1-81	4
	GO:0006959	humoral immune response	4/8	425/28943	3.06266e-06	1.19283e-05	3.22386e-06	Ighg2b/Ighg2c/Ighv5-9/Ighv1-81	4
	GO:0042113	B cell activation	4/8	440/28943	3.51428e-06	1.30028e-05	3.51428e-06	Ighg2b/Ighg2c/Ighv5-9/Ighv1-81	4
	GO:0002253	activation of immune response	4/8	448/28943	3.77447e-06	1.33005e-05	3.59473e-06	Ighg2b/Ighg2c/Ighv5-9/Ighv1-81	4
	GO:0051251	positive regulation of lymphocyte activation	4/8	465/28943	4.37466e-06	1.47148e-05	3.97696e-06	Ighg2b/Ighg2c/Ighv5-9/Ighv1-81	4
	GO:0002449	lymphocyte mediated immunity	4/8	483/28943	5.08459e-06	1.60665e-05	4.34229e-06	Ighg2b/Ighg2c/Ighv5-9/Ighv1-81	4
	GO:0002460	adaptive immune response based on somatic recombination of immune receptors built from immunoglobulin superfamily domains	4/8	486/28943	5.21075e-06	1.60665e-05	4.34229e-06	Ighg2b/Ighg2c/Ighv5-9/Ighv1-81	4
	GO:0002885	positive regulation of hypersensitivity	1/8	12/28943	0.00331245	0.00942776	0.00254804	Ighg2b	1
	GO:0009068	aspartate family amino acid catabolic process	1/8	12/28943	0.00331245	0.00942776	0.00254804	Gcat	1
	GO:0002866	positive regulation of acute inflammatory response to antigenic stimulus	1/8	14/28943	0.0038636	0.0105891	0.00286192	Ighg2b	1
	GO:0002883	regulation of hypersensitivity	1/8	16/28943	0.00441447	0.0116668	0.00315319	Ighg2b	1
	GO:0002524	hypersensitivity	1/8	18/28943	0.00496508	0.0126695	0.00342419	Ighg2b	1
	GO:0002863	positive regulation of inflammatory response to antigenic stimulus	1/8	20/28943	0.00551542	0.0136047	0.00367695	Ighg2b	1
	GO:0002864	regulation of acute inflammatory response to antigenic stimulus	1/8	23/28943	0.00634043	0.0151352	0.0040906	Ighg2b	1
	GO:0002888	positive regulation of myeloid leukocyte mediated immunity	1/8	29/28943	0.00798866	0.0184738	0.00499291	Ighg2b	1
	GO:0002438	acute inflammatory response to antigenic stimulus	1/8	33/28943	0.00908615	0.0197757	0.0053448	Ighg2b	1
	GO:0002675	positive regulation of acute inflammatory response	1/8	33/28943	0.00908615	0.0197757	0.0053448	Ighg2b	1
	GO:0009066	aspartate family amino acid metabolic process	1/8	37/28943	0.0101826	0.0215289	0.00581862	Gcat	1
	GO:0002861	regulation of inflammatory response to antigenic stimulus	1/8	40/28943	0.0110042	0.0226198	0.00611345	Ighg2b	1
	GO:0002673	regulation of acute inflammatory response	1/8	54/28943	0.0148306	0.02814	0.00760542	Ighg2b	1
	GO:0002714	positive regulation of B cell mediated immunity	1/8	54/28943	0.0148306	0.02814	0.00760542	Ighg2b	1
	GO:0002891	positive regulation of immunoglobulin mediated immune response	1/8	54/28943	0.0148306	0.02814	0.00760542	Ighg2b	1
	GO:0002886	regulation of myeloid leukocyte mediated immunity	1/8	75/28943	0.0205458	0.036292	0.00980866	Ighg2b	1
	GO:0002437	inflammatory response to antigenic stimulus	1/8	77/28943	0.0210886	0.036292	0.00980866	Ighg2b	1
	GO:0002712	regulation of B cell mediated immunity	1/8	77/28943	0.0210886	0.036292	0.00980866	Ighg2b	1
	GO:0002889	regulation of immunoglobulin mediated immune response	1/8	77/28943	0.0210886	0.036292	0.00980866	Ighg2b	1
	GO:1901606	alpha-amino acid catabolic process	1/8	79/28943	0.0216311	0.0363796	0.00983234	Gcat	1
	GO:0050766	positive regulation of phagocytosis	1/8	91/28943	0.0248808	0.0409151	0.0110581	Ighg2b	1
	GO:0009063	cellular amino acid catabolic process	1/8	96/28943	0.026232	0.0421994	0.0114052	Gcat	1
	GO:0019731	antibacterial humoral response	1/8	105/28943	0.0286601	0.0451245	0.0121958	Ighg2c	1
	GO:0002526	acute inflammatory response	1/8	112/28943	0.030545	0.0470902	0.0127271	Ighg2b	1
	GO CC DOWN GENES
	No CCs were found
	GO CC UP GENES
	ID	Description	Gene Ratio	Bg Ratio	P value	P Adj	q value	Gene ID	Count
	GO:0042571	immunoglobulin complex, circulating	4/8	139/28804	3.58101e-08	2.18972e-07	1.02443e-07	Ighg2b/Ighg2c/Ighv5-9/Ighv1-81	4
	GO:0019814	immunoglobulin complex	4/8	150/28804	4.86604e-08	2.18972e-07	1.02443e-07	Ighg2b/Ighg2c/Ighv5-9/Ighv1-81	4
	GO:0043034	costamere	1/8	19/28804	0.00526552	0.0157965	0.0073902	Ahnak2	1
	GO MF DOWN GENES
	ID	Description	Gene Ratio	Bg Ratio	P value	P Adj	q value	Gene ID	Count
	GO:0031731	CCR6 chemokine receptor binding	1/4	21/28404	0.00295421	0.0443131	0.00621938	Defb1	1
	GO:0048020	CCR chemokine receptor binding	1/4	56/28404	0.00786334	0.0484125	0.00679474	Defb1	1
	GO:0042379	chemokine receptor binding	1/4	77/28404	0.0108001	0.0484125	0.00679474	Defb1	1
	GO:0004867	serine-type endopeptidase inhibitor activity	1/4	130/28404	0.0181829	0.0484125	0.00679474	Serpinb2	1
	GO:0004252	serine-type endopeptidase activity	1/4	193/28404	0.0269049	0.0484125	0.00679474	Prss1	1
	GO:0008236	serine-type peptidase activity	1/4	211/28404	0.0293862	0.0484125	0.00679474	Prss1	1
	GO:0004866	endopeptidase inhibitor activity	1/4	216/28404	0.0300746	0.0484125	0.00679474	Serpinb2	1
	GO:0017171	serine hydrolase activity	1/4	216/28404	0.0300746	0.0484125	0.00679474	Prss1	1
	GO:0030414	peptidase inhibitor activity	1/4	224/28404	0.0311753	0.0484125	0.00679474	Serpinb2	1
	GO:0061135	endopeptidase regulator activity	1/4	232/28404	0.032275	0.0484125	0.00679474	Serpinb2	1
	GO MF UP GENES
	ID	Description	Gene Ratio	Bg Ratio	P value	P Adj	q value	Gene ID	Count
	GO:0034987	immunoglobulin receptor binding	4/7	141/28404	2.01301e-08	1.81171e-07	4.23791e-08	Ighg2b/Ighg2c/Ighv5-9/Ighv1-81	4
	GO:0003823	antigen binding	4/7	233/28404	1.51494e-07	6.81724e-07	1.59468e-07	Ighg2b/Ighg2c/Ighv5-9/Ighv1-81	4
	GO:0016408	C-acyltransferase activity	1/7	22/28404	0.00540976	0.0162293	0.00379632	Gcat	1
	GO:0030170	pyridoxal phosphate binding	1/7	52/28404	0.0127463	0.023382	0.00546948	Gcat	1
	GO:0070279	vitamin B6 binding	1/7	53/28404	0.01299	0.023382	0.00546948	Gcat	1
	GO:0016407	acetyltransferase activity	1/7	98/28404	0.0239055	0.0358582	0.00838789	Gcat	1
	GO:0019842	vitamin binding	1/7	136/28404	0.0330422	0.0424829	0.00993751	Gcat	1
	REACTOME DOWN GENES
	ID	Description	Gene Ratio	Bg Ratio	P value	P Adj	q value	Gene ID	Count
	R-MMU-1461973	Defensins	2/3	52/8501	0.000109673	0.00109673	0.00023089	Prss1/Defb1	2
	R-MMU-6803157	Antimicrobial peptides	2/3	90/8501	0.00033026	0.0016513	0.000347643	Prss1/Defb1	2
	R-MMU-75205	Dissolution of Fibrin Clot	1/3	12/8501	0.00422932	0.0140977	0.00296794	Serpinb2	1
	R-MMU-1461957	Beta defensins	1/3	17/8501	0.00598801	0.01497	0.00315158	Defb1	1
	R-MMU-1592389	Activation of Matrix Metalloproteinases	1/3	33/8501	0.0116019	0.0205036	0.00431654	Prss1	1
	R-MMU-1462054	Alpha-defensins	1/3	35/8501	0.0123021	0.0205036	0.00431654	Prss1	1
	R-MMU-1442490	Collagen degradation	1/3	55/8501	0.0192864	0.027552	0.00580043	Prss1	1
	R-MMU-1474228	Degradation of the extracellular matrix	1/3	107/8501	0.0372913	0.0466141	0.0098135	Prss1	1
	R-MMU-1474244	Extracellular matrix organization	1/3	231/8501	0.0793338	0.0881487	0.0185576	Prss1	1
	REACTOME UP GENES
	Not found
	WikiPathways DOWN GENES
	ID	Description	GeneRatio	BgRatio	P value	P Adj	q value	Gene ID	Count
	WP460	Blood clotting cascade	1/1	20/4560	0.00438596	0.00438596		Serpinb2 (18788)	1
	WikiPathways UP GENES
	Not found
