# Supplementary material for: Cabergoline as a Novel Strategy for Post-Pregnancy Breast Cancer Prevention in Mice and Human
Source: Research Square preprint supplement (doi:10.21203/rs.3.rs-3854490/v1), 2024-02-05
Supplement: Supplementary file 5 [file 6b38a57c2dc51e8badd489a8.xlsx]

## Sheet: Supplementary Table S18
		Variable	Category	HR	2.5%	97.5%	P value
		Exposition group	Without exposition	(ref.)
			Exposition	0.247	0.061	0.998	0.05
		Age		1.108	1.052	1.167	<0.001
		Level of socioeconomic deprivation MEDEA	Lowest deprivation quintile	1.859	0.937	3.688	0.076
			Q2	1.945	1.039	3.641	0.038
			Q3	(ref.)
			Q4	1.655	0.863	3.171	0.129
			Highest deprivation quintile	0.904	0.406	2.013	0.805
			Rural	0.774	0.383	1.565	0.475
			Unknown	1.92	1.007	3.661	0.048
		Family history of breast cancer		2.247	0.556	9.082	0.256
		Family history of other malignancies (no breast cancer)		1.531	0.214	10.951	0.672
		Obesity		0.612	0.27	1.388	0.24
		Type 2 Diabetes Mellitus		3.477	0.486	24.87	0.214
		Smoking status	Never smoker	(ref.)
			Current smoker	0.968	0.55	1.704	0.91
			Former smoker	0.952	0.578	1.57	0.849
		BMI	<=25	(ref.)
			(25, 30]	1.678	1.099	2.563	0.017
			>30	0.897	0.521	1.544	0.695
			Unknown	1.958	0.814	4.714	0.134
		Alcohol intake	Low risk	(ref.)
			Risk	0.703	0.334	1.481	0.354
			Unknown	0.79	0.551	1.132	0.199
		Physical activity	0	(ref.)
			1-2	0.281	0.063	1.258	0.097
			3-4	0.556	0.153	2.02	0.372
			Unknown	0.311	0.099	0.979	0.046
		Polycystic ovarian disease		0.924	0.229	3.735	0.912
		Hormone replacement therapy		1.066	0.656	1.732	0.798
		Drugs of breast cancer prevention		0	0	Inf	0.994
		Previous mammography		2.297	1.269	4.158	0.006
