# Supplementary material for: Cabergoline as a Novel Strategy for Post-Pregnancy Breast Cancer Prevention in Mice and Human
Source: Research Square preprint supplement (doi:10.21203/rs.3.rs-3854490/v1), 2024-02-05
Supplement: Supplementary file 6 [file 6f5311755250d2386b3dd304.xlsx]

## Sheet: Supplementary Table S14
	Row.names	Symbol	A1_Nullip	A2_Nullip	A3_Nullip	A4_Nullip	A5_Nullip	F1_Mult_AD	F2_Mult_AD	F3_Mult_AD	F4_Mult_AD	F5_Mult_AD	Exp_Mean	Mean_Nullip	Mean_Mult_AD	Log2FC	Stat	P value	P Adj
	ENSMUSG00000058625.5	Gm17383	0	0	0	0	0	0	0	0	108.697	0	10.8697	0	21.7394	4.50712	104.616	1.48276e-24	9.54493e-21
	ENSMUSG00000031258.4	Xkrx	349.84	363.606	237.018	4707.76	607.29	517.181	297.645	1492.91	88189.8	358.347	9712.14	1253.1	18171.2	3.857	38.3118	6.02964e-10	1.87057e-07
	ENSMUSG00000027694.9	Gm8325	0	0	0	0	0	1.95366	0	0	62.079	0	6.40327	0	12.8065	3.78728	61.2619	4.99661e-15	5.84807e-12
	ENSMUSG00000029920.9	Smarcad1	118.526	115.999	97.0242	418.627	162.146	110.882	104.624	206.53	9138.3	118.448	1059.11	182.464	1935.76	3.40007	18.4465	1.74745e-05	0.000937399
	ENSMUSG00000085300.1	Gm16345	0	0	0	0	0	6.97532	13.0368	24.1028	0	0.18211	4.4297	0	8.85941	3.3015	10.7545	0.00104024	0.0231105
	ENSMUSG00000090036.1	Gm15900	0	0	0	0	0	0	0	0	41.3138	0	4.13138	0	8.26276	3.21144	39.4838	3.3079e-10	1.16029e-07
	ENSMUSG00000068397.4	Gm10240	0.000643	0.01441	0.014891	0.003502	0.008194	0.024221	36.9007	0.007097	1.8e-05	0.020946	3.69946	0.008328	7.3906	3.05681	45.7198	1.36437e-11	7.73537e-09
	ENSMUSG00000091228.1	Gm20390	0	0.507507	0	0	0	0	0	0	36.7621	0	3.72696	0.101501	7.35242	2.92272	58.6425	1.8909e-14	1.94755e-11
	ENSMUSG00000098799.1	Trgj4	0	0	26.9505	63.0857	0	0	0	8.78098	664.951	28.241	79.2009	18.0072	140.395	2.89511	14.4004	0.000147768	0.00517672
	ENSMUSG00000044330.8	Gm9790	0	0	0	13.8508	0	0	0	0	125.41	0	13.9261	2.77016	25.082	2.79036	25.213	5.13358e-07	4.9994e-05
	ENSMUSG00000069083.4	Gm10259	0	0	0	0	0	0	0	0	27.7444	0	2.77444	0	5.54888	2.71125	83.9505	5.0733e-20	1.30632e-16
	ENSMUSG00000042082.7	Arsb	17.5233	23.2081	26.2731	48.1975	32.7137	18.7458	14.5038	27.6383	895.818	24.2402	112.886	29.5831	196.189	2.68877	22.3214	2.3062e-06	0.00016918
	ENSMUSG00000076493.1	Trbj2-2	12.1542	111.382	58.6291	0	3.98025	73.207	147.307	0	799.365	80.4404	128.646	37.2291	220.064	2.53172	10.7382	0.00104945	0.023235
	ENSMUSG00000113339.1	Gm17915	0	0	0	0	0	0.259822	0	0	23.4303	0	2.36901	0	4.73802	2.52055	47.8452	4.61233e-12	2.82769e-09
	ENSMUSG00000105094.1	Obox4-ps10	1.37973	0	0	0	0	0	0	0	31.4232	0	3.28029	0.275946	6.28464	2.51329	31.0028	2.57656e-08	4.28025e-06
	ENSMUSG00000083911.1	Gm4342	0	2.32858	0	0.612076	0.782903	1.28052	0	0	42.1797	0.840814	4.80246	0.744712	8.86021	2.49863	25.1771	5.22992e-07	5.04364e-05
	ENSMUSG00000103476.1	Gm34302	0	0	0	0	0	0	0	21.5529	0	0	2.15529	0	4.31058	2.40887	11.1116	0.000857879	0.0200632
	ENSMUSG00000090550.2	Prlh	0	1.7146	1.79845	0	8.66461	0	0	0	85.2964	0	9.74741	2.43553	17.0593	2.39413	22.3701	2.2485e-06	0.000165893
	ENSMUSG00000076904.2	Traj25	9.21451	203.777	114.867	0	19.4293	221.106	225.838	30.6803	1037.17	308.245	217.033	69.4576	364.608	2.37547	10.8965	0.000963486	0.0218652
	ENSMUSG00000111564.1	Stmn1-rs1	3.32044	6.6576	2.18398	0.708257	5.34278	5.77764	2.33784	1.05871	99.5147	5.39884	13.2301	3.64261	22.8175	2.35902	20.8059	5.08249e-06	0.00033385
	ENSMUSG00000080718.1	Gm8019	0	0	0	0	0	0	0	0	19.567	0	1.9567	0	3.9134	2.29672	46.2749	1.02773e-11	6.01429e-09
	ENSMUSG00000095029.1	Gm21370	0	0.377598	0.714124	0	0.433012	2.07735	2.46832	1.49667	17.498	2.6655	2.77306	0.304947	5.24117	2.25783	30.3757	3.55959e-08	5.5549e-06
	ENSMUSG00000099545.1	Gm13276	0	0	0.668512	0	0	0.776932	0	0	20.4808	0	2.19262	0.133702	4.25155	2.2117	34.3897	4.5111e-09	1.00135e-06
	ENSMUSG00000099634.1	Gm29462	0	0	0	0	0	0	0	0	17.7099	0	1.77099	0	3.54198	2.18332	19.488	1.01232e-05	0.000603384
	ENSMUSG00000076900.1	Traj29	27.4827	220.132	61.9891	0	11.2848	257.254	376.257	8.89711	617.843	166.567	174.771	64.1777	285.364	2.1354	9.9184	0.00163635	0.0328149
	ENSMUSG00000083017.1	Gm12163	0	5.01792	1.95177	0	0	1.61241	0	0.53689	41.0999	4.07463	5.42935	1.39394	9.46477	2.12808	19.6069	9.51238e-06	0.000570942
	ENSMUSG00000090197.1	Dnaja1-ps	0.708981	0	0.481094	0.786699	0.237703	0	0	0.189839	26.1975	0	2.86018	0.442895	5.27747	2.12122	26.1078	3.22882e-07	3.35237e-05
	ENSMUSG00000107145.1	Gm43442	0	4.70702	4.93549	0	0	7.84772	0	0	49.9155	0	6.74057	1.9285	11.5526	2.09976	19.3856	1.06807e-05	0.00062504
	ENSMUSG00000078887.10	Gm6710	0	0.417891	0.340474	0.9009	0	0.828805	0	1.14051	19.4344	1.18936	2.42523	0.331853	4.51861	2.05087	24.7469	6.53729e-07	5.99034e-05
	ENSMUSG00000116408.1	AL645849.1	1.01161	6.65946	8.24832	2.33166	6.01309	5.2146	4.4337	11.0042	90.4561	4.17525	13.9548	4.85283	23.0568	2.03924	16.8683	4.00653e-05	0.00182915
	ENSMUSG00000057072.11	Spata45	1.16372	0.966787	4.04265	0.816973	1.49537	1.58017	0.452697	2.46842	44.6474	1.04603	5.86802	1.6971	10.0389	2.03312	18.8631	1.40445e-05	0.000784453
	ENSMUSG00000089936.1	Gm16199	0	17.1587	11.7338	0	0	11.0597	61.4259	20.4532	0	40.2739	16.2105	5.7785	26.6425	2.02785	10.9392	0.00094149	0.021568
	ENSMUSG00000096086.1	Gm4761	0	1.06772	1.69762	0	0	0.467733	0	0.897735	24.391	0.864299	2.93861	0.553068	5.32415	2.02575	24.4963	7.44516e-07	6.75019e-05
	ENSMUSG00000078097.3	Gm10913	0	0	0	0	0	0	0	0	15.1749	0	1.51749	0	3.03498	2.01256	33.4905	7.16138e-09	1.47519e-06
	ENSMUSG00000082357.1	Gm13542	0	1.14589	0.73156	0.199134	0.481408	0	1.50113	2.88463	20.5187	0.494467	2.79569	0.511598	5.07979	2.00795	24.8041	6.34615e-07	5.85688e-05
	ENSMUSG00000083274.1	Zcchc9-ps	0.12906	0.165744	0	0.290144	0	0	0	0.692915	16.3582	0	1.76361	0.11699	3.41022	1.98124	35.4716	2.58803e-09	6.11368e-07
	ENSMUSG00000099544.1	Gm18699	0	21.1123	12.5533	0	0	24.8159	88.3963	0	0	32.2083	17.9086	6.73312	29.0841	1.95988	9.56149	0.00198702	0.0376759
	ENSMUSG00000104564.1	Gm17977	0.43038	1.3671	0.289745	0	0	0	0	0.460048	21.6922	0.295125	2.45346	0.417445	4.48947	1.95338	23.8324	1.05101e-06	8.87292e-05
	ENSMUSG00000096397.7	Trav17	3.66554	8.21118	0.940125	0	0	6.19472	4.27346	2.41649	35.7924	12.8303	7.43242	2.56337	12.3015	1.90027	12.8251	0.000341993	0.00989436
	ENSMUSG00000074506.4	Gm10705	0	0	0	0	0	0	0	0	12.9797	0	1.29797	0	2.59594	1.84637	30.6628	3.06994e-08	5.00303e-06
	ENSMUSG00000115651.1	AC122769.4	0	0	0	0	0	0	0	0	12.9306	0	1.29306	0	2.58612	1.84242	50.5963	1.13456e-12	8.19864e-10
	ENSMUSG00000098153.1	Gm27024	0	0	0	0	0	0	0	0	12.7509	0	1.27509	0	2.55018	1.82789	45.2928	1.69676e-11	9.2957e-09
	ENSMUSG00000087198.4	Gm13097	0	4.64846	2.93415	0.79674	1.43758	5.12049	4.53806	3.89936	30.2274	3.21946	5.68217	1.96339	9.40095	1.8114	14.4429	0.000144476	0.00508907
	ENSMUSG00000106545.1	Gm33952	0	0.554777	0	2.32719	3.41595	0	0	0	34.5649	0	4.08628	1.25958	6.91298	1.80816	16.1221	5.93867e-05	0.00248642
	ENSMUSG00000083866.1	Gm13472	4.62735	0	0	0	0	0	0	3.01691	25.6399	0	3.32842	0.92547	5.73136	1.80569	11.9322	0.000551732	0.014164
	ENSMUSG00000092609.1	Gm20481	0	0	0	0	0	0	0	0	12.4591	0	1.24591	0	2.49182	1.80398	36.2579	1.72857e-09	4.36363e-07
	ENSMUSG00000089987.2	Gpx2-ps1	0	2.48361	1.46192	2.38523	0.577672	1.20839	3.09937	2.55412	28.2214	1.48936	4.34811	1.38169	7.31453	1.80365	16.1783	5.76496e-05	0.00241762
	ENSMUSG00000114515.2	Aldoa	2.77127	1.54805	6.32257	2.83428	8.67674	3.92543	4.198	30.9041	47.805	1.0467	11.0032	4.43058	17.5758	1.77425	11.7556	0.000606604	0.0152982
	ENSMUSG00000084190.1	Gm11869	0	8.13472	5.24011	3.32569	3.07582	4.31222	3.81062	2.6212	63.6354	3.29846	9.74542	3.95527	15.5356	1.73854	13.3378	0.000260115	0.0080988
	ENSMUSG00000093492.1	Gm20651	0	0	0	0	0	0	0.952656	9.61106	0	1.09949	1.16632	0	2.33264	1.73667	12.7509	0.00035583	0.0102143
	ENSMUSG00000076481.7	Trbv30	3.08444	17.3299	7.93407	0	0	7.34863	15.3307	0.850202	69.8679	12.4922	13.4238	5.66968	21.1779	1.73343	12.2811	0.00045757	0.0123269
	ENSMUSG00000081692.1	Gm15971	9.41758	33.9534	40.52	5.39795	3.3038	38.9771	52.7134	7.79827	147.087	68.9333	40.8102	18.5185	63.1018	1.71552	15.3702	8.83728e-05	0.00344253
	ENSMUSG00000030470.15	Csrp3	32.2695	9.09937	101.46	15.6785	5.84573	24.3043	79.904	413.081	30.0995	2.35736	71.4099	32.8706	109.949	1.71179	9.02677	0.00266054	0.0474749
	ENSMUSG00000005553.14	Atp4a	0.085678	0.363947	0.970197	0.173555	0.736987	0.481117	1.02146	0.152294	16.3849	0.696915	2.1067	0.466073	3.74734	1.69516	16.956	3.82555e-05	0.00176803
	ENSMUSG00000114905.1	Gm48113	12.874	11.2901	9.9922	2.88695	11.4477	11.1275	7.66747	14.4629	123.673	10.7393	21.6161	9.69819	33.534	1.69065	10.2428	0.00137215	0.0284567
	ENSMUSG00000070522.4	Gm6505	1.01671	0.519006	0.937257	0.230269	1.33085	1.832	2.39645	0	18.4043	1.2768	2.79436	0.806818	4.78191	1.67809	16.4836	4.9073e-05	0.00215997
	ENSMUSG00000085812.1	Gm15843	0	0.318568	1.01102	0	0	0.277933	0	0	14.2516	0.691733	1.65509	0.265918	3.04425	1.67569	21.8196	2.99517e-06	0.000213636
	ENSMUSG00000078886.12	Gm2026	0	0.839264	0.289325	0	0	0	0.93723	0.588219	9.59172	3.18923	1.5435	0.225718	2.86128	1.65545	15.065	0.000103873	0.00391026
	ENSMUSG00000085487.1	Gm15654	0	13.4878	14.3192	2.20061	4.14901	6.8799	12.6316	12.6418	78.614	7.25539	15.2179	6.83132	23.6045	1.6516	12.1703	0.000485553	0.0127446
	ENSMUSG00000029541.12	Cyp2w1	0	0.202179	0	1.58598	3.34932	0.883546	0.37831	0.058684	24.5997	0.543463	3.16012	1.0275	5.29274	1.63399	10.3481	0.00129607	0.027132
	ENSMUSG00000075014.1	Gm10800	6.98959	0	1.151	2.82456	4.09488	0	0	7.00566	50.0361	0	7.21018	3.01201	11.4084	1.62892	10.3806	0.00127343	0.0268108
	ENSMUSG00000082432.1	Gm11231	1.22213	4.71366	3.27299	3.35952	4.18203	1.84546	3.59039	2.29028	50.9795	3.45721	7.89132	3.35007	12.4326	1.62663	12.2701	0.000460271	0.0123453
	ENSMUSG00000113097.1	Gm47959	1.35336	1.28227	5.01458	0.882288	0.952971	1.70942	2.15133	3.58686	29.2685	2.94641	4.9148	1.89709	7.9325	1.62446	13.1856	0.000282109	0.00867864
	ENSMUSG00000087286.1	Gm9013	0	0.144815	0	0	0.155041	0.26449	0.142748	0.244132	10.6275	0	1.15787	0.0599712	2.25577	1.61898	36.0705	1.90302e-09	4.71162e-07
	ENSMUSG00000113512.1	Gm9063	0	0.800629	1.13175	0	0	0.935467	0.249771	0.237639	13.9851	0.864122	1.82045	0.386476	3.25442	1.61754	19.9401	7.99081e-06	0.000491063
	ENSMUSG00000082078.1	Gm12098	1.35787	0	0	3.2342	2.4986	3.58597	1.60418	11.5786	13.942	1.11067	3.89121	1.41813	6.36428	1.60665	11.4229	0.000725429	0.0177447
	ENSMUSG00000097989.1	Gm4335	0	0	0	0	0	0.10453	0	0	10.0959	0	1.02004	0	2.04009	1.60411	48.5758	3.17773e-12	2.04558e-09
	ENSMUSG00000084230.1	Gm14388	0	0.597662	1.17426	0	0	3.5416	5.23848	0.766327	0	5.80628	1.71246	0.354384	3.07054	1.58758	13.9922	0.000183574	0.00621955
	ENSMUSG00000116244.1	AL844841.3	0.486694	2.45396	12.5857	5.76567	8.4364	7.11275	9.91696	4.01199	67.8297	9.65991	12.826	5.94568	19.7063	1.57588	10.9078	0.000957621	0.021786
	ENSMUSG00000094685.2	Gm5900	0	6.84546	0	0	3.45419	10.2754	7.39224	7.63209	10.8234	4.47675	5.08995	2.05993	8.11998	1.57553	10.1369	0.00145332	0.0298656
	ENSMUSG00000076535.1	Igkv1-88	1.23677	5.3564	11.0596	0	1.55293	1.95531	2.14958	6.57115	50.6606	5.79791	8.63402	3.84114	13.4269	1.57534	11.2924	0.000778254	0.0185549
	ENSMUSG00000083237.1	Gm11698	1.03091	3.0106	1.80433	0	0.445139	2.23751	3.22199	4.38051	16.413	2.32552	3.48695	1.2582	5.71571	1.57237	11.9863	0.000535923	0.0138271
	ENSMUSG00000114942.1	Lats2	0	0	0	0	0	0	0	0	9.75506	0	0.975506	0	1.95101	1.56121	78.2908	8.89361e-19	1.76155e-15
	ENSMUSG00000081223.1	Gm12247	0.3305	3.16908	3.37244	0.551863	0.444385	1.11494	1.59002	6.55276	20.2362	2.96228	4.03245	1.57365	6.49124	1.54139	12.6316	0.000379276	0.0106849
	ENSMUSG00000082154.1	Gm16464	0	0	0	0	0	0	0	0	9.47428	0	0.947428	0	1.89486	1.53349	49.3519	2.13926e-12	1.48875e-09
	ENSMUSG00000053310.11	Nrgn	0.7164	0.518134	1.83288	0.523788	2.91027	4.26244	1.59188	3.4479	17.2526	1.59408	3.46504	1.30029	5.62978	1.52714	14.1348	0.000170169	0.00583447
	ENSMUSG00000076749.2	Tcrg-C1	1.63812	3.42998	4.32416	0.811398	1.53533	4.89929	3.01662	2.31186	25.1448	7.8602	5.49718	2.3478	8.64655	1.5268	11.0507	0.000886514	0.0205647
	ENSMUSG00000107066.2	Gm4482	0	3.17368	1.9493	0	0.773836	2.87741	2.23516	0.158109	17.0023	3.72703	3.18968	1.17936	5.2	1.50836	13.9071	0.000192076	0.0063952
	ENSMUSG00000047676.6	Rpsa-ps10	0	0	1.41538	0	0	0.260416	0	0	12.641	0.299082	1.46159	0.283076	2.6401	1.50437	23.6621	1.14823e-06	9.41589e-05
	ENSMUSG00000109558.1	Gm45100	7.00163	3.09392	7.06269	0	0	3.18282	2.31765	2.64762	40.9508	8.70942	7.49665	3.43165	11.5617	1.50311	9.00069	0.00269878	0.047991
	ENSMUSG00000095753.2	Igkv4-53	1.18995	1.47161	6.84278	0	2.99043	0	0.689038	0	39.8872	3.98242	5.70534	2.49895	8.91173	1.50221	11.2315	0.000804194	0.0190311
	ENSMUSG00000083585.1	Gm15885	4.59476	1.89463	3.27467	4.73499	4.51526	0	0	3.24382	54.6772	4.78635	8.17217	3.80286	12.5415	1.49542	9.73724	0.00180572	0.0351175
	ENSMUSG00000106568.1	Gm42814	0	0	0	0	0	0	0	0	9.00768	0	0.900768	0	1.80154	1.48622	24.8191	6.29699e-07	5.85348e-05
	ENSMUSG00000044701.5	Il27	0.625848	1.96158	3.21368	1.52375	2.20024	4.80078	5.71947	1.44322	18.9321	4.59945	4.50201	1.90502	7.099	1.4792	11.5348	0.000683042	0.0169112
	ENSMUSG00000090369.3	4933411K16Rik	0	0.472756	0.169231	0.975207	0.334793	0.279684	0.515741	1.31118	11.6245	0.59394	1.6277	0.390397	2.86501	1.47497	21.1877	4.16422e-06	0.00027996
	ENSMUSG00000071195.4	Gm10318	0	0	0	0	0	0	0	0	8.89039	0	0.889039	0	1.77808	1.47409	43.7675	3.69798e-11	1.83114e-08
	ENSMUSG00000091685.6	Gm17359	0.393118	0.336489	0.718278	0.441656	1.24267	1.33568	0.472155	1.96972	11.8245	1.63236	2.03666	0.626442	3.44688	1.45107	15.5141	8.18918e-05	0.0032341
	ENSMUSG00000081929.1	Rps11-ps2	0	7.34165	10.838	0	2.67297	5.23765	5.64529	7.28507	39.791	6.51549	8.53271	4.17052	12.8949	1.42617	9.70406	0.00183861	0.0355424
	ENSMUSG00000032087.10	Dscaml1	0.350682	8.87131	4.57334	0.386901	1.21888	20.0588	8.50498	1.41017	8.80493	10.6212	6.48012	3.08022	9.88002	1.41496	9.4328	0.00213139	0.0393696
	ENSMUSG00000063586.1	Gm5513	0	0	0	0	0	0	0.085988	0	8.14441	0	0.82304	0	1.64608	1.40386	49.133	2.3918e-12	1.57914e-09
	ENSMUSG00000107568.1	Gm18840	0	0	0	0	0	0	0	0	8.11494	0	0.811494	0	1.62299	1.39121	25.9165	3.56511e-07	3.64278e-05
	ENSMUSG00000109894.1	Gm5904	0	0	0	0	0	0	0	0	8.06813	0	0.806813	0	1.61363	1.38605	39.9825	2.56247e-10	9.56249e-08
	ENSMUSG00000091002.2	Tcerg1l	0.059208	0.772491	0.71905	0	0.042402	1.70269	0.531761	0.165196	8.9471	0.800726	1.37406	0.31863	2.42949	1.37896	23.4263	1.2979e-06	0.000105093
	ENSMUSG00000000247.11	Lhx2	0.138566	2.34027	1.98905	0.030577	0.256726	4.0299	6.60385	0.441719	6.25417	3.03758	2.51224	0.951038	4.07344	1.37872	14.5347	0.000137602	0.00488706
	ENSMUSG00000047394.8	Odf3b	0	0.919076	0	1.30854	0.832237	0.924096	0.429999	2.2935	9.88352	2.12283	1.87138	0.611971	3.13079	1.35759	11.6021	0.000658775	0.0164209
	ENSMUSG00000074903.5	Gm2058	0	0	0	0	0	0	0	0	7.80505	0	0.780505	0	1.56101	1.35671	28.0348	1.19156e-07	1.42704e-05
	ENSMUSG00000055109.5	Gm15155	0	1.7714	0	0	0	0	1.65874	0.941456	8.4883	1.19367	1.40536	0.35428	2.45643	1.35176	30.1383	4.02304e-08	5.98782e-06
	ENSMUSG00000097530.1	Kansl2-ps	1.36154	0	0.530609	0	0	0	0	0.217941	10.7315	1.59872	1.44403	0.37843	2.50963	1.34829	15.9818	6.39538e-05	0.0026217
	ENSMUSG00000070637.2	Srarp	0	0	0.145195	0	1.14856	0	0.253906	0	10.5102	0	1.20579	0.258751	2.15282	1.32465	21.7203	3.15431e-06	0.000223133
	ENSMUSG00000114340.1	Gm18132	1.63745	0.847846	2.45734	0.374517	0.720183	1.12812	1.3478	1.69366	16.3273	2.05638	2.85906	1.20747	4.51065	1.31983	10.5608	0.0011551	0.0249939
	ENSMUSG00000066363.12	Serpina3f	0.076552	3.02323	4.11936	0.776442	1.93061	5.81035	3.7637	1.38615	14.0224	7.0869	4.19957	1.98524	6.4139	1.31239	10.0732	0.00150438	0.0306701
	ENSMUSG00000105928.1	Gm9256	0.130202	0	0	0	0.219512	0	0.157629	0.406275	7.53411	0.184645	0.863237	0.0699428	1.65653	1.31201	33.665	6.54678e-09	1.37051e-06
	ENSMUSG00000113174.1	Gm9292	3.01362	0	0	0.680831	0	0.169956	0.180558	0	15.9687	0	2.00137	0.73889	3.26384	1.29399	9.774	0.00176997	0.0345526
	ENSMUSG00000074812.11	Spdye4c	0	0	0.123762	0	0.407383	0	0	0	8.51407	0	0.904521	0.106229	1.70281	1.28881	36.4628	1.55611e-09	4.11436e-07
	ENSMUSG00000079460.11	4933403O08Rik	0	0.702861	0.453147	0	0.746998	0.105113	0.328554	0.594321	9.94788	0.454	1.33329	0.380601	2.28597	1.25102	16.725	4.32081e-05	0.00194165
	ENSMUSG00000072789.4	Gm10420	0	0.912137	1.49914	0.713049	1.55045	2.17368	0.856767	1.40602	11.0556	2.33816	2.2505	0.934955	3.56605	1.23865	11.6123	0.000655159	0.0163682
	ENSMUSG00000113736.1	Gm40879	0	3.18374	5.46055	0	0	1.28953	2.75015	4.52518	15.5995	2.90676	3.57154	1.72886	5.41422	1.23298	8.96677	0.00274934	0.0487218
	ENSMUSG00000076655.2	Ighv4-1	0	3.21057	3.09513	0	0	0.92176	0	0	19.3437	1.15826	2.77294	1.26114	4.28474	1.22478	9.57459	0.00197289	0.0375184
	ENSMUSG00000103760.1	Gm8009	0	0.473216	0	2.80214	0	0	0	0	14.2483	0	1.75237	0.655071	2.84966	1.21784	9.88103	0.00166991	0.0333276
	ENSMUSG00000047904.6	Sstr2	0.218752	0.236836	0.662712	0.792432	0.302612	0.589719	0.619998	0.375089	9.5714	0.60585	1.39754	0.442669	2.35241	1.21646	9.58351	0.00196333	0.0373759
	ENSMUSG00000092544.8	Gm20422	0	5.99307	1.19042	0	0.805933	0.234619	2.63101	0.952971	20.2128	0.327395	3.23482	1.59788	4.87176	1.17646	10.2207	0.00138873	0.0287215
	ENSMUSG00000050650.7	Mrgpra1	0	0	0	0	0.337689	0	0	0	6.75627	0.228763	0.732272	0.0675378	1.39701	1.16695	29.3234	6.1253e-08	8.38938e-06
	ENSMUSG00000040715.12	Rsc1a1	0	0	0	0	5.69811	0	0.231088	0	18.726	0	2.46552	1.13962	3.79142	1.1631	12.2781	0.000458309	0.0123303
	ENSMUSG00000082174.1	Gm14877	0	0	0	0	0	0	0	0	6.1329	0	0.61329	0	1.22658	1.15483	20.468	6.06357e-06	0.000385508
	ENSMUSG00000111969.1	Gm9129	0	0	0.066548	0.054827	0	0.05499	0	0	6.24062	0	0.641698	0.024275	1.25912	1.14116	40.7994	1.68685e-10	7.00561e-08
	ENSMUSG00000078611.3	Gm5901	0	0	0	0	0	0	0	0	6.01209	0	0.601209	0	1.20242	1.13909	41.1892	1.38182e-10	5.93006e-08
	ENSMUSG00000063442.5	Gm7117	0	0	0	0	0	1.08974	0	4.90735	0	0	0.599709	0	1.19942	1.13712	11.2326	0.000803727	0.0190311
	ENSMUSG00000032191.5	Bcl2l10	0	0.091763	0.196913	0	0	0	0.085811	0.305637	6.1928	0	0.687292	0.0577352	1.31685	1.13119	30.619	3.14011e-08	5.08521e-06
	ENSMUSG00000093880.2	Tmem181c-ps	0	1.01098	0.103683	0	1.53269	0.606467	1.06454	0.634103	7.54254	1.60865	1.41037	0.529471	2.29126	1.10561	13.5894	0.000227471	0.00733061
	ENSMUSG00000091825.1	Gm5778	0	0.434461	0.464997	0	0.114859	0.09628	0.101445	0	6.82001	0.819752	0.88518	0.202863	1.5675	1.09389	19.3032	1.11521e-05	0.000649673
	ENSMUSG00000091736.3	Yy2	0	1.80659	0	0.321632	1.9e-05	1.74664	1.73138	0.838905	5.83505	0.005202	1.22854	0.425648	2.03144	1.08838	15.2414	9.46081e-05	0.00362583
	ENSMUSG00000092622.8	Khdc3	0	2.69697	1.54913	0	2.37358	1.64692	3.35308	2.33322	8.72153	3.36488	2.60393	1.32394	3.88393	1.07147	9.06152	0.00261046	0.0467431
	ENSMUSG00000050468.12	Astl	0.837947	0.966838	0.270627	0.85547	0.803268	0.596309	0.509177	0.534888	10.6676	0.856792	1.68989	0.74683	2.63295	1.0564	9.95532	0.00160385	0.0323635
	ENSMUSG00000079186.3	Gzmc	0	1.10437	0.590567	0	3.79569	0.732085	0.516463	0.115239	14.2161	1.19011	2.22606	1.09813	3.354	1.05324	9.7513	0.00179196	0.0349025
	ENSMUSG00000111805.1	Gm47274	0	0	0	0	0	0	2.78427	0	0	2.5752	0.535947	0	1.07189	1.05095	9.8311	0.00171585	0.0338786
	ENSMUSG00000043165.7	Lor	0.314222	0.640836	0.626516	0	0.185942	0.362388	0.490234	0.290485	7.54414	0.313601	1.07684	0.353503	1.80017	1.04882	15.103	0.0001018	0.00384913
	ENSMUSG00000109368.1	Gm45015	0.516494	0.243305	0.693993	0.14857	0.360977	0.142484	0.988325	0.758071	6.9638	0.536076	1.13521	0.392668	1.87775	1.04709	13.0385	0.000305149	0.00913638
	ENSMUSG00000094076.7	Gm4767	0	0	0	0	2e-06	0	0.420228	0	4.85073	0	0.527096	4e-07	1.05419	1.03857	72.6073	1.58192e-17	2.90949e-14
	ENSMUSG00000093973.1	Mrgpra2a	0.000377	0.000601	0.771869	0	0	0.398648	0	0	6.39615	0	0.756764	0.154569	1.35896	1.0308	21.5751	3.40237e-06	0.000237419
	ENSMUSG00000063875.6	Rps6-ps1	0.417958	0.716702	0	0	1.31914	0.157895	0.502133	0.59808	8.84159	0	1.25535	0.49076	2.01994	1.01847	10.9827	0.000919641	0.0211616
	ENSMUSG00000111620.1	AC118733.1	0	0	0.296278	0	0.781447	0	0.172153	0.153294	6.65519	0	0.805836	0.215545	1.39613	0.979101	18.2226	1.96528e-05	0.00102094
	ENSMUSG00000082318.3	Gm14162	0	0	1.07194	0	0.794313	0	0	0	7.5892	0.817509	1.0273	0.373251	1.68134	0.96536	11.1023	0.000862211	0.0201462
	ENSMUSG00000042269.15	Fam92b	0.293815	0	0.101894	0	0	0.252604	0.236994	0.158219	4.86092	0	0.590445	0.0791418	1.10175	0.961705	21.2198	4.09515e-06	0.000276037
	ENSMUSG00000076439.12	Mog	0.18886	0.061259	0.329326	0.325595	0.195476	0.108851	0.057277	0.407337	6.02852	0.263814	0.796632	0.220103	1.37316	0.959806	16.9764	3.78471e-05	0.001754
	ENSMUSG00000044296.10	Zfp879	0	0.123861	0.585917	1.02657	1.35993	0.200226	1.19663	1.15296	7.44437	0.577808	1.36683	0.619256	2.1144	0.943623	9.97525	0.00158659	0.0320919
	ENSMUSG00000081633.1	Gm8522	0	0.160238	0.654152	0	0.288404	0.146536	0.201343	0.271909	5.03925	0.994738	0.775657	0.220559	1.33076	0.933256	18.0619	2.13836e-05	0.00109902
	ENSMUSG00000033834.7	Tpbpa	0	0.456237	1.73429	0	0.289101	1.84549	0.280516	0.648705	5.07367	1.36359	1.16916	0.495926	1.84239	0.926068	9.98154	0.00158118	0.0320077
	ENSMUSG00000051452.8	Gm11437	0	0	0.193161	0.4768	1.91054	0	0.33666	0.599491	8.46426	0	1.19809	0.5161	1.88008	0.925745	11.5075	0.000693174	0.0171291
	ENSMUSG00000079263.8	Gm6614	0	0	0	0	0	0	0.078816	0.086916	4.27238	0.045371	0.448348	0	0.896697	0.923489	52.302	4.75887e-13	3.604e-10
	ENSMUSG00000061815.11	Rufy4	0.266763	0.615894	1.5898	0.099258	0.64434	0.149287	0.209399	0.107954	9.15314	0.839715	1.36756	0.643211	2.0919	0.911975	11.0443	0.000889622	0.020618
	ENSMUSG00000099342.1	Gm18180	0	0	0	0	0.08588	0	0	0.350483	3.80273	0.178134	0.441723	0.017176	0.866269	0.875588	33.5569	6.92105e-09	1.43718e-06
	ENSMUSG00000053166.14	Cdh22	0	0.868011	0.77931	0	0.250843	0.850891	0.579369	0.325731	4.86759	1.02824	0.954998	0.379633	1.53036	0.875061	10.3319	0.00130752	0.0273495
	ENSMUSG00000101877.1	Gm8176	0.17356	0	0	0.092416	0	0.425498	0.222676	0.477722	3.43287	0	0.482474	0.0531952	0.911753	0.860123	20.89	4.86418e-06	0.000321974
	ENSMUSG00000070524.1	Fcrlb	0	0.172188	0.46205	0.456293	1.73668	0.229089	0	0	8.72846	0	1.17848	0.565442	1.79151	0.834475	9.90942	0.00164435	0.0328985
	ENSMUSG00000109112.1	Gm44544	0	0	0.300549	0	0.178401	0	0	0.046436	4.69166	0	0.521705	0.09579	0.947619	0.82974	23.7036	1.1237e-06	9.34171e-05
	ENSMUSG00000081965.1	Gm11620	0	0.670202	0.120145	0	0.534868	0.397105	0.628667	0.324847	4.45093	0.362306	0.748907	0.265043	1.23277	0.819649	14.132	0.000170424	0.00583543
	ENSMUSG00000056293.12	Gsdmc2	0.862096	0	0	0	0	0.173293	0	0	4.9637	0.20604	0.620513	0.172419	1.06861	0.819171	13.108	0.000294035	0.008932
	ENSMUSG00000020191.11	Spata48	0.688184	1.00749	0.188348	0	3.84951	0.334891	0.943895	0.376639	6.80429	5.44744	1.96407	1.14671	2.78143	0.816807	10.6628	0.0010931	0.0239951
	ENSMUSG00000075359.2	Gm20775	0	0	0	0	0	0	0	0	3.79905	0	0.379905	0	0.75981	0.81542	43.4557	4.33663e-11	2.10687e-08
	ENSMUSG00000095603.4	Olfr106-ps	0	0.11561	0	0	0	0.344283	2.10113	0.438718	0	1.09912	0.409886	0.023122	0.79665	0.812331	24.2523	8.45083e-07	7.47767e-05
	ENSMUSG00000091043.1	Glyatl3	0	0.570728	0.457655	0	0.150839	0.378221	0.133455	0.476562	4.24158	0.615077	0.702412	0.235844	1.16898	0.811519	11.8184	0.000586479	0.0148488
	ENSMUSG00000115954.1	LT629151.3	0	0	0	0	0	0	0	0	3.68291	0	0.368291	0	0.736582	0.796251	32.0821	1.47794e-08	2.68028e-06
	ENSMUSG00000115991.1	LT629154.5	0	0	0	0	1e-06	0	0	0	3.68289	0	0.368289	2e-07	0.736578	0.796247	32.0819	1.47812e-08	2.68028e-06
	ENSMUSG00000107523.1	Gm44451	0	0	0	0	0	0	0.709835	2.88753	0	0	0.359737	0	0.719473	0.781966	11.1763	0.00082847	0.0194638
	ENSMUSG00000106350.2	Gm4869	0	0.329487	0.638919	0.614936	0.913146	0.615911	0.523652	0.109362	6.11091	0.390081	1.02464	0.499298	1.54998	0.766201	9.65908	0.00188418	0.0362598
	ENSMUSG00000112583.1	Gm4930	0	0	0.113951	0	0	0.188332	0	0.177197	3.19061	0.114518	0.378461	0.0227902	0.734131	0.761703	24.4513	7.62104e-07	6.86646e-05
	ENSMUSG00000009670.11	Tex11	0.182634	0.178265	0.384175	0.079245	0.436686	0.529055	0.426016	0.221843	3.86269	0.54359	0.68442	0.252201	1.11664	0.757309	10.843	0.000991697	0.0223405
	ENSMUSG00000081613.1	Gm12109	0	0	0	0	0	0	0	0	3.37448	0	0.337448	0	0.674896	0.744072	20.7726	5.17178e-06	0.00033799
	ENSMUSG00000028417.3	Tal2	0.259741	0.28334	0.523726	0.073143	0.263088	0.203738	0.262737	1.543	3.24487	0.454726	0.711211	0.280608	1.14181	0.742005	11.4768	0.000704693	0.0173971
	ENSMUSG00000091930.1	Vmn2r52	0.178086	0	0	0	0	0.103025	0.144329	0.032036	3.30233	0.041541	0.380135	0.0356172	0.724652	0.735815	27.92	1.26435e-07	1.49338e-05
	ENSMUSG00000109384.1	Gm17931	0	0.230959	0	0	0.970163	0	0.216114	0	5.10005	0	0.651729	0.240224	1.06323	0.734305	9.68955	0.00185319	0.0357705
	ENSMUSG00000039830.8	Olig2	0	0.325966	0.219358	0	0.173626	0	0	0.067652	3.45948	0.921011	0.516709	0.14379	0.889629	0.724281	17.662	2.63844e-05	0.00130648
	ENSMUSG00000089775.1	Gm16270	0	0.447452	0.514285	0	0.095413	0.053117	0	0	3.54525	1.38048	0.6036	0.21143	0.995769	0.720234	14.604	0.000132632	0.00473668
	ENSMUSG00000103260.1	Gm8146	0	0	0	0	0	0	0	0	3.18987	0	0.318987	0	0.637974	0.711912	39.9956	2.54538e-10	9.56249e-08
	ENSMUSG00000108892.1	Gm9449	0	0	0	0	0	0.138237	0.251273	0	2.78075	0	0.317026	0	0.634052	0.708454	26.862	2.18518e-07	2.34442e-05
	ENSMUSG00000023443.13	Esx1	0.238049	0.131942	0.141818	0.233634	0.070146	0.058594	0	0.219397	4.08258	0	0.517616	0.163118	0.872114	0.686671	12.7142	0.000362889	0.0103476
	ENSMUSG00000033007.15	Asic4	0	0.201246	0.119132	0	0.385913	0.10743	0.075259	0.244823	3.46696	0.158743	0.475951	0.141258	0.810643	0.665877	17.0355	3.66873e-05	0.00171756
	ENSMUSG00000082475.2	Gm7206	0	0	0	0	0	2.22414	0	0	0	0.604894	0.282903	0	0.565807	0.646906	10.0057	0.00156055	0.0316648
	ENSMUSG00000095413.1	H2al1e	0	0	0	0	0	0	1.79914	0.961303	0	0	0.276044	0	0.552089	0.634211	9.13354	0.00250965	0.0452211
	ENSMUSG00000071568.5	Gm5874	0	0	0	0	0	0.667215	0	2.02625	0	0	0.269346	0	0.538693	0.621705	9.77015	0.00177368	0.0345727
	ENSMUSG00000098103.1	Gm27005	0	0	0.567101	0	0	0	0.371802	2.98572	0	0	0.392462	0.11342	0.671504	0.586149	9.50421	0.00205001	0.0386143
	ENSMUSG00000046637.3	Ttc34	0.030532	0.120857	0	0.510356	1.1596	0.462883	0.112985	1.25594	3.01677	0.238037	0.690796	0.364269	1.01732	0.564314	11.4053	0.000732337	0.0178401
	ENSMUSG00000116347.1	Ints5	0	0	0	0	0	0.205583	0	0	2.14002	0	0.23456	0	0.469121	0.554953	13.2888	0.000266995	0.00829293
	ENSMUSG00000020651.8	Slc26a4	0.290961	0.865593	0.135968	0.280442	0.100901	0.224694	0.605532	0.026178	3.40018	0.373517	0.630397	0.334773	0.92602	0.529028	10.509	0.00118797	0.0255461
	ENSMUSG00000078795.2	Ceacam15	0	0.234103	0.502833	0	0	0.138503	0.291872	0	2.64277	0.084031	0.389411	0.147387	0.631435	0.507789	10.5951	0.00113389	0.0246592
	ENSMUSG00000075015.3	Gm10801	0	0	0	0	0	0.606764	0	0.37065	1.11439	0	0.20918	0	0.418361	0.504225	9.19057	0.00243265	0.0439566
	ENSMUSG00000056812.13	St8sia3	0.125303	0.195437	0.08439	0.104154	0.03348	0.159612	0.129474	0.079442	2.26454	0.168248	0.334408	0.108553	0.560263	0.493112	14.687	0.000126917	0.00457062
	ENSMUSG00000091873.2	Olfr732	0.03803	0.123896	0.079807	0	0.315877	0.088067	0.092361	0.14336	2.3013	0.160501	0.33432	0.111522	0.557118	0.486342	15.0794	0.00010308	0.00388609
	ENSMUSG00000038193.4	Hand2	0.065258	0	0	0	0	0	0.079304	0.24649	1.68315	0.045652	0.211985	0.0130516	0.410919	0.477928	25.7159	3.95561e-07	4.00996e-05
	ENSMUSG00000025588.4	Nat1	0	0	0.099679	0	0	0.164742	0.173768	1.70213	0	0	0.214032	0.0199358	0.408128	0.4653	15.2382	9.47681e-05	0.00362583
	ENSMUSG00000032818.15	Loxhd1	0	0.223724	0.407526	0	0.412543	0.275158	0.023382	0.033373	2.50144	0.3125	0.418965	0.208759	0.629171	0.430612	10.4835	0.00120447	0.0257805
	ENSMUSG00000044117.12	2900011O08Rik	0.389855	0.041562	0.044748	0	0.132821	0.07395	0.077714	0.034505	2.36048	0	0.315563	0.121797	0.50933	0.428096	14.0894	0.000174319	0.00595297
	ENSMUSG00000068141.5	Gm10232	0	0	0	0	0	0	0	0	1.69859	0	0.169859	0	0.339718	0.421929	13.4338	0.000247135	0.00778177
	ENSMUSG00000081414.2	Gm3943	0	0	0	0	0	0	0	1.42957	0	0.204562	0.163413	0	0.326826	0.40798	10.3538	0.00129209	0.0270983
	ENSMUSG00000020481.15	Ankrd36	0	0.02447	0	0	0.131034	0	0	0.153598	1.68137	0	0.199047	0.0311008	0.366994	0.406821	30.4062	3.50415e-08	5.50173e-06
	ENSMUSG00000060827.2	Olfr1193	0	0.107579	0.188733	0	0	0.098032	0	0.180994	1.69139	0.039911	0.230664	0.0592624	0.402065	0.404494	16.7289	4.31196e-05	0.00194106
	ENSMUSG00000116252.1	MF597757.1	0	0	0	0	0	0.972106	1e-06	0	0	0.606364	0.157847	0	0.315694	0.395824	28.6179	8.8164e-08	1.14077e-05
	ENSMUSG00000114473.1	AC116797.1	0	0	0	0	0	0	0	0	1.56391	0	0.156391	0	0.312782	0.392627	42.3156	7.76701e-11	3.70357e-08
	ENSMUSG00000089748.2	Matr3-ps2	0.078577	0.051026	0.219605	0	0	0.226824	0.715896	0	0	1.04366	0.233559	0.0698416	0.397276	0.38522	9.47092	0.00208755	0.0388665
	ENSMUSG00000054746.18	Abca15	0.094194	0.1052	0.037818	0.04683	0.01871	0	0	0.029072	1.67042	0.07581	0.207805	0.0605504	0.35506	0.353544	15.0536	0.000104499	0.00392641
	ENSMUSG00000027577.14	Chrna4	0	0	0.022276	0	0.835785	0.055218	0	0.051395	2.34736	0	0.331203	0.171612	0.490795	0.347586	28.6062	8.86967e-08	1.14193e-05
	ENSMUSG00000100920.1	Gm18348	0	0	0	0	0	0.412888	0.145825	0.768277	0	0	0.132699	0	0.265398	0.339591	10.4048	0.00125686	0.0265486
	ENSMUSG00000070375.7	Olfr406	0	0.034384	0.037038	0	0	0	0	0	1.38854	0	0.145996	0.0142844	0.277708	0.333096	23.3869	1.32475e-06	0.000106931
	ENSMUSG00000089951.8	Gm14435	0	0.240947	0	0	0	0.483266	0	0.784754	0	0.252712	0.176168	0.0481894	0.304146	0.315206	9.54933	0.00200022	0.0378983
	ENSMUSG00000096775.1	Gm5796	0	0	0	0	0	0.756244	0	0.423831	0.040459	0	0.122053	0	0.244107	0.31511	21.1288	4.2942e-06	0.000286454
	ENSMUSG00000031142.17	Cacna1f	0.023684	0.192044	0.682706	0	0.493939	0.192558	1.02002	0.121119	1.36667	0.23853	0.433127	0.278475	0.587779	0.312587	9.81918	0.00172702	0.0339717
	ENSMUSG00000026247.13	Ecel1	0	0.03645	4.20358	0	0.038842	0.117923	3.53024	0.139649	2.2067	0.295174	1.05686	0.855774	1.25794	0.282984	25.5264	4.36379e-07	4.33835e-05
	ENSMUSG00000068218.6	Ssxb9	0	0	0	0	0	0.124886	0	0.589996	0	0.33771	0.105259	0	0.210518	0.275625	8.9397	0.00279039	0.0493473
	ENSMUSG00000108896.1	Gm20136	0	0	0	0	0	0	0	1.04202	0	0	0.104202	0	0.208404	0.273103	9.45486	0.0021059	0.0390388
	ENSMUSG00000030617.13	Ccdc83	0	0	0	0	0	0.34549	0	0.457123	0	0	0.0802613	0	0.160523	0.214775	12.943	0.000321115	0.0094835
	ENSMUSG00000095143.5	Hsd3b4	0	0	0	0	0	0.059692	0.062847	0.370859	0	0.21711	0.0710508	0	0.142102	0.191691	11.8789	0.000567742	0.0144741
	ENSMUSG00000067591.12	Klra3	0	0	0	0	0	0	0	0	0.586655	0	0.0586655	0	0.117331	0.160057	10.3486	0.00129576	0.027132
	ENSMUSG00000055198.3	Gm12830	0	0	0	0	0	0	0.081038	0.287878	0	0	0.0368916	0	0.0737832	0.102703	10.3612	0.00128689	0.02705
	ENSMUSG00000068117.10	Mei1	0	0	0	0	0	0.061067	0.032071	0.085404	0	0.147688	0.032623	0	0.065246	0.0911866	10.6651	0.00109175	0.0239859
	ENSMUSG00000069825.12	Spata22	0	0	0	0	0	0	0	0.273581	0	0	0.0273581	0	0.0547162	0.0768549	11.0426	0.000890412	0.020618
	ENSMUSG00000019893.13	Ros1	0	0	0	0	0	0.01298	0	0.082398	0.008959	0	0.0104337	0	0.0208674	0.0297955	10.2945	0.0013343	0.0278193
	ENSMUSG00000054667.7	Irs4	0.033956	0	0	0	0.078732	0	0	0	0	0	0.0112688	0.0225376	0	-0.0321539	9.61392	0.00193108	0.0369417
	ENSMUSG00000041991.18	Hrnr	0	0.025709	0	0.129838	0	0.007641	0	0	0	0	0.0163188	0.0311094	0.0015282	-0.0419944	13.3599	0.000257067	0.00803304
	ENSMUSG00000094295.3	Olfr819	0	0	0	0.167958	0	0	0	0	0	0	0.0167958	0.0335916	0	-0.0476663	9.27349	0.00232494	0.0423372
	ENSMUSG00000083027.1	Gm13140	0.101734	0.033389	0.068713	0	0	0	0	0	0	0	0.0203836	0.0407672	0	-0.0576474	9.21703	0.00239775	0.0434865
	ENSMUSG00000029286.12	Enam	0.069831	0.034075	0.098041	0	0.024253	0	0	0	0	0	0.02262	0.04524	0	-0.0638342	13.4483	0.000245225	0.00774761
	ENSMUSG00000066071.6	Cyp4a12a	0.227583	0	0	0	0	0	0	0	0	0	0.0227583	0.0455166	0	-0.064216	9.03695	0.00264577	0.0472768
	ENSMUSG00000038048.8	Cntnap5c	0.148784	0	0	0.086177	0	0	0	0	0	0	0.0234961	0.0469922	0	-0.0662507	13.5248	0.000235435	0.00751126
	ENSMUSG00000026572.11	Tbx19	0	0	0	0.262791	0	0	0	0	0	0	0.0262791	0.0525582	0	-0.0739	9.47517	0.00208271	0.0388631
	ENSMUSG00000024650.4	Slc22a6	0	0	0	0.273053	0	0	0	0	0	0	0.0273053	0.0546106	0	-0.0767104	13.9071	0.000192071	0.0063952
	ENSMUSG00000095779.1	Gm2163	0	0.063007	0.152987	0	0.081945	0	0	0	0	0	0.0297939	0.0595878	0	-0.0835031	9.40348	0.00216574	0.0398327
	ENSMUSG00000027350.8	Chgb	0.35773	0	0	0	0	0	0	0	0	0.038523	0.0396253	0.071546	0.0077046	-0.088621	9.41017	0.00215786	0.0397624
	ENSMUSG00000064310.10	Zpld1	0	0	0.04103	0	0.284174	0	0	0	0	0	0.0325204	0.0650408	0	-0.0909087	9.48671	0.00206965	0.0388631
	ENSMUSG00000021721.5	Htr1a	0.113156	0.042111	0.045404	0.056216	0.089856	0	0.019683	0	0	0	0.0366426	0.0693486	0.0039366	-0.0910641	12.5809	0.000389718	0.0109193
	ENSMUSG00000115589.1	AC137842.3	0	0	0	0.331649	0	0	0	0	0	0	0.0331649	0.0663298	0	-0.0926537	10.4298	0.00124	0.0262507
	ENSMUSG00000092518.9	Fam71e2	0.333435	0	0	0	0	0	0	0	0	0	0.0333435	0.066687	0	-0.0931369	13.7508	0.000208731	0.00685537
	ENSMUSG00000023945.6	Slc5a7	0.041674	0	0	0	0.328335	0	0	0.015005	0	0	0.0385014	0.0740018	0.003001	-0.0986734	13.5945	0.000226852	0.00732901
	ENSMUSG00000018634.10	Crhr1	0	0	0	0.358052	0	0	0	0	0	0	0.0358052	0.0716104	0	-0.0997805	11.3476	0.000755456	0.0181642
	ENSMUSG00000079644.2	Gm1110	0	0	0	0.362031	0	0	0	0	0	0	0.0362031	0.0724062	0	-0.100851	9.47517	0.00208271	0.0388631
	ENSMUSG00000101372.1	Gm19028	0.381573	0	0	0	0	0	0	0	0	0	0.0381573	0.0763146	0	-0.1061	10.9196	0.000951535	0.0217142
	ENSMUSG00000028004.12	Npy2r	0.111356	0	0.310808	0	0	0	0	0	0	0.031196	0.045336	0.0844328	0.0062392	-0.107967	10.6233	0.00111674	0.0243273
	ENSMUSG00000081179.1	Gm13136	0.215785	0.111146	0.076501	0	0	0	0	0	0	0	0.0403432	0.0806864	0	-0.111948	15.2974	9.18432e-05	0.00355086
	ENSMUSG00000093485.1	Gm20708	0	0	0	0.412976	0	0	0	0.001105	0	0	0.0414081	0.0825952	0.000221	-0.114175	9.21	0.00240697	0.0435845
	ENSMUSG00000105246.1	Gm21043	0.433765	0	0	0	0	0	0	0	0	0	0.0433765	0.086753	0	-0.120024	9.87133	0.00167874	0.0333276
	ENSMUSG00000031139.15	Mcf2	0.155342	0.15634	0.062249	0	0.123188	0.025717	0	0.023962	0	0	0.0546798	0.0994238	0.0099358	-0.122484	10.2619	0.00135808	0.0282693
	ENSMUSG00000016982.6	Pom121l2	0	0.052621	0.226446	0	0.168022	0	0	0	0	0	0.0447089	0.0894178	0	-0.123557	9.56865	0.00197929	0.0375845
	ENSMUSG00000079387.10	Luzp4	0	0	0	0	0.449935	0	0	0	0	0	0.0449935	0.089987	0	-0.124311	9.86187	0.00168739	0.0334478
	ENSMUSG00000025418.7	Bsnd	0.191391	0	0	0	0.303202	0	0	0	0	0.038277	0.053287	0.0989186	0.0076554	-0.125082	10.4841	0.00120409	0.0257805
	ENSMUSG00000030092.14	Cntn6	0.127717	0	0	0	0.360485	0	0	0	0	0	0.0488202	0.0976404	0	-0.134405	17.9697	2.24446e-05	0.00114668
	ENSMUSG00000067231.4	Cyp2c65	0.163548	0.053091	0.11423	0	0.169516	0	0	0	0	0	0.0500385	0.100077	0	-0.137605	11.6117	0.000655391	0.0163682
	ENSMUSG00000050625.4	Ccdc121	0	0.056774	0	0.452874	0	0	0	0	0	0	0.0509648	0.10193	0	-0.140032	11.359	0.000750836	0.0181642
	ENSMUSG00000031727.8	Pmfbp1	0.195908	0	0	0.352714	0.030211	0	0	0.023504	0	0.030492	0.0632829	0.115767	0.0107992	-0.142539	12.9397	0.000321693	0.00948829
	ENSMUSG00000074059.3	Fbxw18	0	0	0	0.372606	0.149186	0	0	0	0	0	0.0521792	0.104358	0	-0.143208	9.47228	0.00208599	0.0388656
	ENSMUSG00000032852.3	Rspo4	0.129281	0.084025	0.135695	0	0.179007	0	0	0	0	0	0.0528008	0.105602	0	-0.144832	14.2211	0.00016254	0.00561026
	ENSMUSG00000057723.3	Krt33b	0	0	0	0.533112	0	0	0	0	0	0	0.0533112	0.106622	0	-0.146163	10.4298	0.00124	0.0262507
	ENSMUSG00000074704.9	Rad21l	0.539491	0	0	0	0	0	0	0	0	0	0.0539491	0.107898	0	-0.147825	12.8317	0.000340796	0.00989193
	ENSMUSG00000029368.10	Alb	0.384485	0	0	0	0.159493	0	0	0	0	0	0.0543978	0.108796	0	-0.148993	14.4623	0.000142992	0.00505062
	ENSMUSG00000035805.13	Mlc1	0.081148	0.175921	0.113693	0.250092	0	0.031315	0	0	0	0.037869	0.0690038	0.124171	0.0138368	-0.149036	9.96009	0.0015997	0.0323064
	ENSMUSG00000026354.8	Lct	0	0.015051	0.097406	0.174251	0.321297	0.040241	0	0	0	0.016196	0.0664442	0.121601	0.0112874	-0.149366	14.5554	0.000136098	0.00484701
	ENSMUSG00000090968.2	Gm3978	0.505175	0	0.057109	0	0	0	0	0	0	0	0.0562284	0.112457	0	-0.153749	18.6559	1.5656e-05	0.00086508
	ENSMUSG00000089675.1	Ugt1a8	0.367065	0	0.343031	0	0	0	0	0	0	0.108308	0.0818404	0.142019	0.0216616	-0.160669	9.04551	0.00263341	0.0470886
	ENSMUSG00000047565.5	Acot10	0	0	0	0	0.609118	0	0	0	0	0	0.0609118	0.121824	0	-0.165846	9.73515	0.00180777	0.0351308
	ENSMUSG00000005892.4	Trh	0	0	0	0.208244	0.417027	0	0	0	0	0	0.0625271	0.125054	0	-0.169995	9.46795	0.00209093	0.0388731
	ENSMUSG00000091401.1	Gm9252	0	0	0.142763	0	0.495274	0	0	0	0	0	0.0638037	0.127607	0	-0.173265	10.5463	0.00116424	0.0251704
	ENSMUSG00000093748.1	Gm19031	0	0.159701	0	0.494092	0	0	0	0	0	0	0.0653793	0.130759	0	-0.177291	10.4519	0.00122521	0.0261159
	ENSMUSG00000015787.15	Abo	0	0	0	0.619502	0.061981	0	0	0	0	0	0.0681483	0.136297	0	-0.184339	13.9055	0.000192236	0.0063952
	ENSMUSG00000078721.1	Fam205a1	0.313262	0	0.035093	0.293539	0.130592	0.036148	0	0.04272	0	0	0.0851354	0.154497	0.0157736	-0.184686	15.153	9.91401e-05	0.00377627
	ENSMUSG00000060816.3	Vmn1r52	0.544001	0.043318	0.136257	0	0.075411	0	0	0.058724	0	0.038079	0.089579	0.159797	0.0193606	-0.186208	12.6614	0.000373273	0.010562
	ENSMUSG00000052955.5	Cpvl	0.721469	0.07193	0	0	0	0	0.067258	0	0	0	0.0860657	0.15868	0.0134516	-0.193205	10.1823	0.00141793	0.0292784
	ENSMUSG00000051617.3	Krt9	0	0	0.041188	0.40765	0.285267	0	0	0	0	0	0.0734105	0.146821	0	-0.19764	19.0103	1.30012e-05	0.000737375
	ENSMUSG00000067144.6	Slc22a7	0	0.050706	0.054559	0	0.701704	0	0	0	0	0.054586	0.0861555	0.161394	0.0109172	-0.200192	10.1496	0.00144329	0.0296831
	ENSMUSG00000023279.7	Bmp15	0.438777	0.063437	0.034173	0	0.37194	0	0.029653	0.078953	0	0.034137	0.105107	0.181665	0.0285486	-0.200212	10.9553	0.000933338	0.0214385
	ENSMUSG00000022061.8	Nkx3-1	0.303201	0.051955	0.269083	0	0.315438	0	0	0.052607	0	0.097255	0.108954	0.187935	0.0299724	-0.205851	10.8755	0.000974428	0.0220286
	ENSMUSG00000047298.3	Kcnv2	0.112687	0.018352	0.257279	0.522808	0.137086	0.049057	0	0.076077	0	0.118492	0.129184	0.209642	0.0487252	-0.205944	9.06307	0.00260824	0.046736
	ENSMUSG00000079244.3	Gm5622	0.412802	0	0	0	0.355704	0	0	0	0	0	0.0768506	0.153701	0	-0.20627	14.3453	0.000152161	0.00530895
	ENSMUSG00000040693.7	Slco4c1	0	0	0.144473	0.187411	0.490152	0	0	0	0	0.041193	0.0863229	0.164407	0.0082386	-0.207759	20.3279	6.52413e-06	0.000410733
	ENSMUSG00000106780.1	Gm7939	0.775247	0	0	0	0	0	0	0	0	0	0.0775247	0.155049	0	-0.207955	10.8942	0.000964652	0.0218652
	ENSMUSG00000036422.10	Pcdh8	0	0.025808	0.2881	0.160687	0.302766	0	0	0	0	0	0.0777361	0.155472	0	-0.208483	22.2141	2.43879e-06	0.000176891
	ENSMUSG00000114176.1	Gm48329	0.46156	0	0	0	0.31639	0	0	0	0	0	0.077795	0.15559	0	-0.20863	10.732	0.00105298	0.0232931
	ENSMUSG00000051879.4	Krt71	0.035419	0	0.049536	0.122522	0.637116	0	0	0	0	0.049541	0.0894134	0.168919	0.0099082	-0.21095	12.1466	0.000491766	0.0128684
	ENSMUSG00000068289.6	Cma2	0.791781	0	0	0	0	0	0	0	0	0	0.0791781	0.158356	0	-0.212079	9.87133	0.00167874	0.0333276
	ENSMUSG00000052562.15	Slc22a30	0.568738	0.08345	0	0.245257	0.086725	0	0	0.064562	0	0.085467	0.11342	0.196834	0.0300058	-0.216571	11.3724	0.000745442	0.0181062
	ENSMUSG00000087512.2	Gm11985	0.819676	0	0	0	0	0	0	0	0	0	0.0819676	0.163935	0	-0.219011	10.8942	0.000964652	0.0218652
	ENSMUSG00000091821.1	Srsx	0.826985	0	0	0	0	0	0	0	0	0	0.0826985	0.165397	0	-0.220822	11.8802	0.000567332	0.0144741
	ENSMUSG00000025496.5	Drd4	0.188154	0.034964	0.112983	0	0.558946	0	0	0.058032	0	0	0.0953079	0.179009	0.0116064	-0.220927	14.0481	0.00017819	0.00606106
	ENSMUSG00000084074.1	Gm8310	0	0	0	0.832932	0	0	0	0	0	0	0.0832932	0.166586	0	-0.222293	11.3476	0.000755456	0.0181642
	ENSMUSG00000105020.1	Gm7205	0.320426	0	0.356306	0	0.176218	0	0	0	0	0	0.085295	0.17059	0	-0.227236	12.5947	0.000386843	0.0108506
	ENSMUSG00000094443.2	Sgo2b	0.608327	0.076647	0.357994	0	0.136244	0.022754	0.047769	0.148339	0.03134	0.027495	0.145691	0.235842	0.0555394	-0.227514	9.18456	0.00244066	0.0440396
	ENSMUSG00000093642.1	Vmn2r-ps124	0.860287	0	0	0	0	0	0	0	0	0	0.0860287	0.172057	0	-0.229043	9.87133	0.00167874	0.0333276
	ENSMUSG00000039070.5	Cpa4	0.533901	0.109718	0.116497	0.031811	0.305266	0.033178	0.034218	0.030835	0.02212	0.077995	0.129554	0.219439	0.0396692	-0.230093	10.2534	0.0013643	0.0283554
	ENSMUSG00000081350.1	Gm5388	0.397257	0.32841	0	0	0.155884	0	0	0	0	0	0.0881551	0.17631	0	-0.234269	11.3102	0.000770833	0.0184291
	ENSMUSG00000116120.1	AC116487.2	0.160352	0.731488	0	0	0	0	0	0	0	0	0.089184	0.178368	0	-0.23679	10.6678	0.00109019	0.023972
	ENSMUSG00000112190.1	Gm47209	0.455068	0.147427	0.079188	0	0.313331	0	0	0	0	0.079374	0.107439	0.199003	0.0158748	-0.239112	10.5883	0.00113808	0.0247087
	ENSMUSG00000084006.1	Gm14245	0.215389	0	0	0.594804	0.238016	0	0	0	0	0.120404	0.116861	0.209642	0.0240808	-0.24025	11.0275	0.000897711	0.020694
	ENSMUSG00000116330.1	LT629152.8	0	0	0	0	0.910064	0	0	1e-06	0	0	0.0910065	0.182013	2e-07	-0.241245	11.0857	0.000869971	0.0202723
	ENSMUSG00000030000.10	Add2	0.095496	0.063278	0.082584	0.72042	0.902989	0.365367	0.069444	0.30663	0	0.063613	0.266982	0.372953	0.161011	-0.241901	10.8476	0.000989226	0.0223044
	ENSMUSG00000045330.8	4933402E13Rik	0.816275	0	0.057014	0	0.11281	0	0	0.044028	0	0	0.103013	0.19722	0.0088056	-0.24704	16.3013	5.40273e-05	0.00231472
	ENSMUSG00000110793.1	Gm7395	0	0.223824	0.719457	0	0	0	0	0	0	0	0.0943281	0.188656	0	-0.249331	9.62788	0.00191646	0.0367165
	ENSMUSG00000021415.13	4933417A18Rik	0	0	0.359729	0.591379	0	0	0	0	0	0	0.0951108	0.190222	0	-0.25123	10.4975	0.00119533	0.0256488
	ENSMUSG00000045871.5	Slitrk6	0.274485	0.022343	0.120436	0.258453	0.548199	0	0.020887	0.129697	0	0.072132	0.144663	0.244783	0.0445432	-0.253022	11.3597	0.000750533	0.0181642
	ENSMUSG00000027867.10	Spag17	0.044926	0.011714	0	0	0.929942	0	0	0	0	0	0.0986582	0.197316	0	-0.259804	11.6158	0.000653951	0.016364
	ENSMUSG00000027416.2	Otor	0.986868	0	0	0	0	0	0	0	0	0	0.0986868	0.197374	0	-0.259873	11.8802	0.000567332	0.0144741
	ENSMUSG00000044041.4	Krt13	0	0.464401	0	0	0.539718	0	0	0	0	0	0.100412	0.200824	0	-0.264024	12.2538	0.00046431	0.0124407
	ENSMUSG00000083478.1	Gm15375	0	0	0	1.04103	0	0	0	0	0	0	0.104103	0.208206	0	-0.272866	9.47517	0.00208271	0.0388631
	ENSMUSG00000101337.6	Dnah7c	0.059519	0.168398	0	0.021363	1.13847	0.007303	0	0.274527	0	0	0.166958	0.27755	0.056366	-0.27427	16.0352	6.21765e-05	0.00257393
	ENSMUSG00000074435.10	Smcp	0	0	0	0.893373	0.153757	0	0	0	0	0	0.104713	0.209426	0	-0.274322	9.47373	0.00208435	0.0388631
	ENSMUSG00000094992.1	Fbxw25	0.443261	0	0	0	0.610602	0	0	0	0	0	0.105386	0.210773	0	-0.275928	16.6622	4.46616e-05	0.00199651
	ENSMUSG00000022868.5	Ahsg	0.168408	0	0	0.836698	0.154632	0	0	0	0	0.078337	0.123808	0.231948	0.0156674	-0.278513	12.2449	0.000466519	0.0124739
	ENSMUSG00000082871.2	Gm13263	0.587603	0	0	0	0.479043	0	0	0	0	0	0.106665	0.213329	0	-0.278971	9.71584	0.00182687	0.0354196
	ENSMUSG00000085683.2	Tmem238l	0	0	0.371662	0	0.697149	0	0	0	0	0	0.106881	0.213762	0	-0.279486	9.53311	0.00201798	0.0381505
	ENSMUSG00000054362.9	Lexm	0	0	0.368314	0.48538	0.21644	0	0	0	0	0	0.107013	0.214027	0	-0.2798	16.3404	5.2924e-05	0.00227883
	ENSMUSG00000084065.1	Gm15159	1.07723	0	0	0	0	0	0	0	0	0	0.107723	0.215446	0	-0.281486	9.87133	0.00167874	0.0333276
	ENSMUSG00000020010.7	Vnn3	0	0.057065	0.552365	0	0.546453	0	0.053355	0	0	0	0.120924	0.231177	0.010671	-0.284724	12.978	0.000315166	0.00934932
	ENSMUSG00000057697.2	Vmn1r53	0.394857	0	0.109419	0.719846	0	0	0.095437	0	0	0	0.131956	0.244824	0.0190874	-0.288664	9.77639	0.00176767	0.0345339
	ENSMUSG00000112588.1	Gm6859	0	0.240706	0	0	0.892122	0	0	0	0	0	0.113283	0.226566	0	-0.294624	10.4414	0.00123221	0.0262216
	ENSMUSG00000101004.1	Gm8596	0	0	0	1.14802	0	0	0	0	0	0	0.114802	0.229604	0	-0.298194	9.47517	0.00208271	0.0388631
	ENSMUSG00000054727.2	1700013H16Rik	0.918373	0	0.098055	0.242026	0	0	0.085459	0	0	0	0.134391	0.251691	0.0170918	-0.299428	12.2215	0.000472423	0.012502
	ENSMUSG00000089837.9	Npcd	0	0	0.027924	0	1.12934	0	0	0	0	0	0.115726	0.231453	0	-0.300361	12.3733	0.000435507	0.011917
	ENSMUSG00000050138.7	Kcnk12	0	0.052839	0.113691	0.374821	0.618625	0	0	0	0	0	0.115998	0.231995	0	-0.300997	20.3183	6.55705e-06	0.000411799
	ENSMUSG00000107574.1	Gm17834	0.430821	0	0	0	0.733311	0	0	0	0	0	0.116413	0.232826	0	-0.30197	10.6255	0.0011154	0.0243187
	ENSMUSG00000110502.1	Gm8804	1.17301	0	0	0	0	0	0	0	0	0	0.117301	0.234602	0	-0.304046	11.1887	0.000822978	0.019368
	ENSMUSG00000071361.1	Mcpt9	0.431182	0.203636	0	0.677267	0	0	0.047598	0.042289	0	0	0.140197	0.262417	0.0179774	-0.310483	16.05	6.16906e-05	0.00255793
	ENSMUSG00000031241.17	Tbx22	0.643318	0.096163	0.069012	0.796466	0.102346	0.029008	0.090019	0.212434	0	0.068932	0.21077	0.341461	0.0800786	-0.312669	10.2285	0.00138286	0.0286461
	ENSMUSG00000103707.5	Pcdha6	0	0.057236	0	0.664641	0.835073	0	0.088388	0.190654	0	0	0.183599	0.31139	0.0558084	-0.312749	11.2399	0.000800588	0.0189819
	ENSMUSG00000040706.4	Agmat	0	0	0.247964	0.816591	0.327039	0.068301	0	0.064025	0	0	0.152392	0.278319	0.0264652	-0.316563	9.87598	0.0016745	0.0333276
	ENSMUSG00000073052.3	D130052B06Rik	0	0.235116	0.203908	0.852078	0.199411	0	0.129505	0	0	0.053928	0.167395	0.298103	0.0366866	-0.324425	12.7103	0.000363657	0.0103476
	ENSMUSG00000066272.5	Olfr559	0.262159	0.27193	0.146121	0.443916	0.433643	0	0.127132	0.09609	0	0	0.178099	0.311554	0.0446444	-0.328265	9.24887	0.00235641	0.0428497
	ENSMUSG00000091903.8	Gm6460	0	0	1.27839	0	0	0	0	0	0	0	0.127839	0.255678	0	-0.328467	9.33719	0.0022455	0.0410066
	ENSMUSG00000036805.13	Noxa1	0.155505	0	0.630291	0	0.571687	0	0.062847	0	0	0	0.142033	0.271497	0.0125694	-0.328507	13.7364	0.000210342	0.00689949
	ENSMUSG00000097244.1	Gm7928	0.936463	0	0	0.343328	0	0	0	0	0	0	0.127979	0.255958	0	-0.328788	9.86522	0.00168432	0.0334126
	ENSMUSG00000081975.1	Gm12482	1.30121	0	0	0	0	0	0	0	0	0	0.130121	0.260242	0	-0.333701	8.93088	0.00280388	0.0494825
	ENSMUSG00000040340.13	Tex45	0.303395	0.065578	0.352445	0.406457	0.370933	0	0	0	0	0.150294	0.16491	0.299762	0.0300588	-0.33552	12.763	0.000353546	0.0101601
	ENSMUSG00000096719.1	Mrgpra2b	0.279305	0.361235	0	0	0.672056	0	0	0	0	0	0.13126	0.262519	0	-0.336305	15.727	7.31733e-05	0.0029532
	ENSMUSG00000044576.6	Garem2	0	0.073977	0.132902	0.4826	0.920544	0.08785	0	0.040904	0	0.10615	0.184493	0.322005	0.0469808	-0.336492	12.928	0.000323703	0.00952574
	ENSMUSG00000026602.9	Nphs2	0	0.155495	0.4691	0.745998	0.298386	0.187444	0.029074	0.025803	0	0.03347	0.194477	0.333796	0.0551582	-0.338078	11.033	0.000895034	0.0206878
	ENSMUSG00000111187.1	AC132392.1	0	0	0.356864	0.693315	0.477991	0	0.099672	0	0	0.061163	0.168901	0.305634	0.032167	-0.339074	14.7528	0.000122563	0.0044457
	ENSMUSG00000015401.12	Tmem27	0.271895	0	0.283209	0.776823	0	0	0	0	0	0	0.133193	0.266385	0	-0.340717	17.2475	3.28135e-05	0.00157339
	ENSMUSG00000090175.1	Ugt1a9	0.229356	0	1.53847	0	0	0	0	0.319059	0	0	0.208688	0.353565	0.0638118	-0.347521	8.97282	0.00274025	0.0485942
	ENSMUSG00000043747.12	1520401A03Rik	0	0	0.027645	0.59128	1.29921	0.042619	0.391459	0	0	0	0.235221	0.383627	0.0868156	-0.348348	12.9428	0.000321163	0.0094835
	ENSMUSG00000031936.9	Hephl1	0.204828	0.035584	0.134312	0.427684	0.873392	0.079269	0.099794	0.059002	0	0	0.191386	0.33516	0.047613	-0.349907	14.8851	0.000114259	0.00420295
	ENSMUSG00000082938.1	Gm2810	1.17645	0	0.259123	0	0.182324	0	0	0	0	0.18322	0.180112	0.323579	0.036644	-0.352524	10.2096	0.0013971	0.0288716
	ENSMUSG00000110515.1	Gm9644	1.48073	0	0	0	0	0	0	0	0.061791	0	0.154252	0.296146	0.0123582	-0.356508	14.4734	0.000142155	0.00502796
	ENSMUSG00000106445.1	Gm21190	0.707751	0	0.607384	0	0.331459	0	0.181524	0	0	0	0.182812	0.329319	0.0363048	-0.359239	10.0873	0.00149295	0.0304853
	ENSMUSG00000021797.2	9230112D13Rik	0	0.168245	0.538708	0	0.710099	0	0	0	0	0	0.141705	0.28341	0	-0.359983	9.54531	0.00200461	0.0379535
	ENSMUSG00000006218.4	Fam131c	0	0	0.08085	0.399414	0.959712	0	0	0	0	0	0.143998	0.287995	0	-0.365127	18.3372	1.85056e-05	0.000982962
	ENSMUSG00000113903.1	Gm5655	0	0	0.29215	0	1.15552	0	0	0	0	0	0.144767	0.289534	0	-0.36685	11.3817	0.000741718	0.0180345
	ENSMUSG00000094024.1	Esp18	0.068314	0	0.189736	0.078063	1.12601	0	0	0	0	0	0.146212	0.292425	0	-0.37008	16.307	5.38647e-05	0.0023116
	ENSMUSG00000100648.1	Gm28659	0	1.08542	0.379079	0	0	0	0	0	0	0	0.14645	0.2929	0	-0.37061	9.83603	0.00171126	0.0338428
	ENSMUSG00000049598.9	Vsig8	0.270674	0.140351	0.185303	0.869413	0.366638	0.153117	0.053699	0	0	0.075561	0.211476	0.366476	0.0564754	-0.371201	9.3717	0.00220361	0.0403274
	ENSMUSG00000081434.3	Gm14165	0	0	0	0	1.47642	0	0	0	0	0	0.147642	0.295284	0	-0.373268	12.2242	0.000471737	0.0125011
	ENSMUSG00000083553.1	Gm11989	0	0	0	1.28176	0.221288	0	0	0	0	0	0.150305	0.30061	0	-0.379188	9.47428	0.00208372	0.0388631
	ENSMUSG00000058447.8	Gm26920	0.591253	0	0	0.919374	0	0	0	0	0	0	0.151063	0.302125	0	-0.380868	31.629	1.86618e-08	3.24677e-06
	ENSMUSG00000018589.8	Glra2	0.261962	0.065381	0.277893	1.20265	0.068367	0.058856	0.08927	0.052238	0	0.069659	0.214628	0.375251	0.0540046	-0.383813	14.7565	0.000122325	0.0044457
	ENSMUSG00000050870.4	Mrgprb8	0.631041	0	0	0.719033	0.432379	0	0	0.084931	0	0.109801	0.197718	0.356491	0.0389464	-0.384758	10.7574	0.00103865	0.0230953
	ENSMUSG00000074637.7	Sox2	1.32851	0.09861	0.212224	0.568575	0.157473	0.04384	0.230488	0.204762	0	0.159228	0.300371	0.473078	0.127664	-0.385497	9.07319	0.00259385	0.0465105
	ENSMUSG00000040809.10	Chil3	0.479613	0.138177	2.07882	0	0.146887	0.658642	0.1938	0	0	0.14878	0.384472	0.568699	0.200244	-0.386241	9.72852	0.00181431	0.0352312
	ENSMUSG00000018698.15	Lhx1	0.038205	0.149234	0.769504	0.92927	0.133325	0.022152	0.023252	0.082516	0	0.240902	0.238836	0.403908	0.0737644	-0.386771	10.2639	0.00135656	0.0282606
	ENSMUSG00000107755.1	Mageb16-ps2	0	0	0.300209	0.519743	0.856315	0	0.098715	0	0	0	0.177498	0.335253	0.019743	-0.388908	10.8336	0.000996736	0.0224344
	ENSMUSG00000008489.18	Elavl2	0	0	0.112336	0	1.68558	0.069615	0.024359	0	0	0.092899	0.198479	0.359583	0.0373746	-0.390227	9.83329	0.00171382	0.0338673
	ENSMUSG00000019936.10	Epyc	1.02527	0.06047	0	0.428573	0.321615	0	0.113078	0.050259	0	0	0.199927	0.367186	0.0326674	-0.404833	16.4275	5.05465e-05	0.00219671
	ENSMUSG00000040650.8	Cyp2b23	0.571227	0.507921	0.516278	0.226205	0.37582	0	0.098863	0.296659	0.028089	0	0.262106	0.43949	0.0847222	-0.408232	10.0957	0.00148619	0.0303714
	ENSMUSG00000112657.1	BC106175	0	0	0.131371	1.60383	0.419933	0.175578	0	0	0	0.215105	0.254582	0.431027	0.0781366	-0.408511	9.17382	0.00245502	0.0442677
	ENSMUSG00000057465.5	Saa2	0	0.121903	0	1.16359	0.865765	0	0.113969	0	0	0.268689	0.253392	0.430252	0.0765316	-0.409878	15.5172	8.17563e-05	0.00323371
	ENSMUSG00000091676.1	Gm8374	1.64455	0	0	0	0	0	0	0	0	0	0.164455	0.32891	0	-0.410243	11.8802	0.000567332	0.0144741
	ENSMUSG00000110306.1	Gm18192	0	1.65287	0	0	0	0	0	0	0	0	0.165287	0.330574	0	-0.412049	13.935	0.000189246	0.00636468
	ENSMUSG00000111032.1	Olfr1543-ps1	0.740448	0.14128	0	0.94944	0.142924	0.121126	0	0.113773	0	0	0.220899	0.394818	0.0469798	-0.413844	9.02744	0.00265957	0.0474749
	ENSMUSG00000099381.1	Gm18303	0.148665	0.096114	0.412376	0	1.01965	0	0	0	0	0	0.167681	0.335361	0	-0.41723	17.1543	3.44637e-05	0.00162528
	ENSMUSG00000029909.6	Prss37	0.776226	0	0	0	1.06198	0	0	0	0	0.119958	0.195816	0.367641	0.0239916	-0.417486	12.5514	0.000395912	0.0110448
	ENSMUSG00000027719.15	Adad1	0	0.392372	0	0	1.62296	0	0	0	0	0.228954	0.224429	0.403066	0.0457908	-0.423989	10.1256	0.00146224	0.030001
	ENSMUSG00000106917.1	Gm7832	0.989506	0.141397	0	0	0.746548	0.124691	0	0	0	0	0.200214	0.37549	0.0249382	-0.424409	10.6348	0.00110979	0.0242581
	ENSMUSG00000037924.6	Olfr16	1.20594	0	0.039338	0.681388	0	0	0	0.121256	0	0.039312	0.208723	0.385333	0.0321136	-0.424631	13.1071	0.000294172	0.008932
	ENSMUSG00000090256.1	Alms1-ps1	0	0.173007	0.07704	1.30882	0.718191	0.123815	0	0.083729	0	0.206066	0.269067	0.455412	0.082722	-0.426764	10.5266	0.0011767	0.0253336
	ENSMUSG00000026450.14	Chit1	0.143229	0	0.66594	0.829903	0.181688	0	0	0	0	0.072098	0.189286	0.364152	0.0144196	-0.42735	19.0833	1.25133e-05	0.000714422
	ENSMUSG00000022101.6	Fgf17	0.506507	0.245937	0.088018	0.438613	0.52667	0.05499	0	0	0	0	0.186074	0.361149	0.010998	-0.429045	18.1851	2.00438e-05	0.00103845
	ENSMUSG00000043460.7	Elfn2	0	2.3416	2.89638	0	0.196079	0.418055	0.171578	0.091405	1.73989	0.315998	0.817098	1.08681	0.547385	-0.431468	9.85683	0.00169202	0.0335137
	ENSMUSG00000031323.8	Dmrtc1a	0	0	0	0	1.89534	0	0	0	0	0.106628	0.200197	0.379068	0.0213256	-0.433251	13.2894	0.000266917	0.00829293
	ENSMUSG00000029019.8	Nppb	0	0	0	1.75687	0	0	0	0	0	0	0.175687	0.351374	0	-0.434427	13.0839	0.000297846	0.00898036
	ENSMUSG00000020469.8	Myl7	1.22924	0	0.276442	0	0.273116	0	0	0	0	0	0.17788	0.35576	0	-0.439101	9.79136	0.00175334	0.0343484
	ENSMUSG00000035129.6	Gm6781	0.700093	0.091186	0	1.15177	0	0.082967	0	0	0	0	0.202602	0.38861	0.0165934	-0.449898	16.8782	3.98563e-05	0.00182284
	ENSMUSG00000031250.8	Tnmd	1.12197	0.161436	0.173343	0.998816	0	0.143241	0.150957	0.067168	0	0.086924	0.290386	0.491113	0.089658	-0.452514	10.7054	0.00106826	0.0235703
	ENSMUSG00000030158.12	Clec12b	0.823837	0.164109	0.61669	0.5076	0.348568	0	0	0.068286	0	0.353459	0.288255	0.492161	0.084349	-0.460574	11.3164	0.000768235	0.0183841
	ENSMUSG00000104725.1	Gm2860	0	0	1.0348	0.847359	0	0	0	0	0	0	0.188216	0.376432	0	-0.460933	11.4642	0.000709505	0.0174823
	ENSMUSG00000027270.14	Lamp5	0.545558	0.252249	0.056215	0.834017	0.603947	0	0.251324	0.043407	0	0	0.258672	0.458397	0.0589462	-0.461754	16.24	5.58024e-05	0.00236714
	ENSMUSG00000059201.12	Lep	3.50516	0.059244	0.159595	0.316035	0.726408	0.079122	0.967803	0.933864	0	0.095641	0.684287	0.953288	0.415286	-0.464811	10.534	0.00117197	0.025295
	ENSMUSG00000082962.3	Gm10601	0	0.52023	0.426449	0.341949	1.17082	0	0	0.247931	0	0.135677	0.284306	0.49189	0.0767216	-0.470496	9.37949	0.00219426	0.0402422
	ENSMUSG00000090872.8	Gm3239	1.58477	0.352876	0	0	0	0	0	0	0	0	0.193765	0.387529	0	-0.472518	8.9447	0.00278275	0.0492461
	ENSMUSG00000048544.8	5930422O12Rik	1.75677	0.301266	0.482892	0	0	0	0.140896	0.125837	0	0.162351	0.297001	0.508186	0.0858168	-0.474033	8.98257	0.00272567	0.0483689
	ENSMUSG00000026691.10	Fmo3	0	0.265194	0.758943	0.390317	1.12601	0	0	0.367963	0	0.053401	0.296183	0.508093	0.0842728	-0.475997	9.77093	0.00177292	0.0345727
	ENSMUSG00000079705.4	Ssxb1	1.20284	0	0.456211	0	0.601453	0	0.205446	0	0	0	0.246595	0.452101	0.0410892	-0.480048	10.9606	0.000930712	0.0213972
	ENSMUSG00000085867.1	Gm5834	0.088826	0.114645	0.368445	0.706572	0.850196	0	0.107221	0	0	0	0.22359	0.425737	0.0214442	-0.481097	12.8944	0.000329573	0.00966838
	ENSMUSG00000082913.1	Gm14739	0.626371	0	0	0	1.35944	0	0	0	0	0	0.198581	0.397162	0	-0.4825	14.1714	0.00016689	0.00573731
	ENSMUSG00000091786.1	Gm8425	0	0	0	0	2.00553	0	0	0	0	0.000277	0.200581	0.401106	5.54e-05	-0.486486	12.2807	0.000457669	0.0123269
	ENSMUSG00000098006.1	Gm8565	0.451167	0.23297	0	1.02513	0.616714	0	0	0.097112	0	0.125447	0.254854	0.465196	0.0445118	-0.488265	11.7143	0.00062022	0.0155957
	ENSMUSG00000092519.2	Actl9	0.367289	0.317132	0.085139	1.47183	0.084216	0	0	0.131937	0	0.085377	0.254292	0.465121	0.0434628	-0.489641	14.5734	0.000134802	0.00480752
	ENSMUSG00000072944.11	Nup62cl	0.550039	0.90036	0.991534	0.181015	0.108631	0.338467	0.047707	0	0	0.109859	0.322761	0.546316	0.0992066	-0.492372	9.41363	0.00215378	0.0397261
	ENSMUSG00000113701.1	B230303A05Rik	0.86258	0.036287	0.407284	0.709207	0.724076	0	0.033924	0.150581	0	0.297203	0.322114	0.547887	0.0963416	-0.497603	12.4699	0.000413562	0.0114258
	ENSMUSG00000094401.1	Gm14365	2.06733	0	0	0	0	0	0	0	0	0	0.206733	0.413466	0	-0.499237	11.8802	0.000567332	0.0144741
	ENSMUSG00000078487.8	Ankrd65	1.37633	0	0	0	0.865329	0	0	0	0	0.107705	0.234936	0.448332	0.021541	-0.503645	13.3926	0.00025262	0.00792292
	ENSMUSG00000090817.7	Gm4450	0.096429	0.336489	1.10922	0	1.19741	0	0	0.332613	0.099365	0	0.317153	0.54791	0.0863956	-0.510772	13.6281	0.000222825	0.00722609
	ENSMUSG00000114041.1	Gm9269	0.212514	0	0.2863	1.63536	0	0	0	0	0	0	0.213417	0.426835	0	-0.512818	10.5028	0.00119192	0.0255969
	ENSMUSG00000098218.1	Gm27043	0	0.125606	0.268904	0	2.12731	0	0	0	0	0.270674	0.279249	0.504364	0.0541348	-0.513094	9.72325	0.00181952	0.0353058
	ENSMUSG00000022157.8	Mcpt8	0	0	0	0	2.1666	0	0	0	0	0	0.21666	0.43332	0	-0.519361	16.1942	5.7169e-05	0.00240138
	ENSMUSG00000102051.1	I830127L07Rik	0.43296	0.184993	1.18329	0	0.389892	0	0	0	0	0	0.219113	0.438227	0	-0.524291	13.4037	0.000251131	0.00788581
	ENSMUSG00000038651.15	Sycp2l	0	0.298177	0.361271	2.60387	0.278016	0.132672	0.174228	0.586232	0	0.040117	0.447458	0.708267	0.18665	-0.525639	9.82951	0.00171734	0.0338786
	ENSMUSG00000045083.14	Lingo2	0.230906	0.070424	0	2.73277	0.713443	0	0.678216	0	0	0.395475	0.482123	0.749509	0.214738	-0.526304	10.4423	0.00123164	0.0262216
	ENSMUSG00000115702.1	AC107711.5	0	0	0	2.22683	0	0	0	0	0	0	0.222683	0.445366	0	-0.531435	13.9071	0.000192071	0.0063952
	ENSMUSG00000102167.1	Gm2345	0	0	0	2.26315	0	0	0	0	0	0	0.226315	0.45263	0	-0.538667	11.3476	0.000755456	0.0181642
	ENSMUSG00000115726.1	AC164099.2	0.333727	0.639875	0.508517	1.59255	1.22137	0.187574	0.798257	0.178816	0	0.230052	0.569074	0.859208	0.27894	-0.53974	11.3509	0.000754117	0.0181642
	ENSMUSG00000027359.16	Slc27a2	0.727376	0.262082	0.389536	2.14809	0.154132	0.064377	0.531835	0.296829	0	0.078082	0.465234	0.736243	0.194225	-0.539895	10.822	0.00100299	0.0225357
	ENSMUSG00000058925.11	1700011I03Rik	0	0	0	1.07623	1.297	0	0	0	0	0	0.237323	0.474646	0	-0.560369	16.2073	5.67741e-05	0.00238876
	ENSMUSG00000002588.12	Pon1	0.593087	0.720863	0.606097	0	0.453237	0	0	0	0	0	0.237328	0.474657	0	-0.560379	22.9124	1.69552e-06	0.0001315
	ENSMUSG00000101026.1	D730001G18Rik	0.472248	0	0.076912	0.696704	1.35908	0	0	0	0	0.146508	0.275145	0.520989	0.0293016	-0.563344	19.4718	1.02097e-05	0.000605735
	ENSMUSG00000097565.1	Gm26965	0	0.30922	0.961972	1.29025	0.295546	0	0	0.309192	0	0	0.316618	0.571398	0.0618384	-0.565484	13.691	0.00021549	0.0070325
	ENSMUSG00000091366.1	Gm17040	0	0	0.446346	1.95425	0	0	0	0	0	0	0.24006	0.480119	0	-0.565713	18.4068	1.78421e-05	0.000955126
	ENSMUSG00000032680.11	6820408C15Rik	2.06504	0.448369	0.279265	1.3754	0.396371	0.487798	0.299121	0.061111	0	0.601392	0.601387	0.912889	0.289884	-0.568511	8.99692	0.00270435	0.0480569
	ENSMUSG00000029757.16	Dync1i1	1.01822	0.039292	0.04231	0.31405	1.70368	0	0	0.466042	0	0	0.358359	0.62351	0.0932084	-0.570548	9.10683	0.00254657	0.0458223
	ENSMUSG00000047641.8	Krt87	0.236651	0.131812	0.283785	1.27622	1.68463	0.234489	0.164312	0.182412	0	0.189179	0.438349	0.72262	0.154078	-0.577863	9.84044	0.00170716	0.0337877
	ENSMUSG00000027446.2	9230104L09Rik	3.20957	0	0.229652	0	0.46917	0	0	0.95275	0	0	0.486114	0.781678	0.19055	-0.581609	9.79773	0.00174728	0.0343178
	ENSMUSG00000047509.1	Gm6776	0.72993	0	0.31906	0.814806	0.625146	0	0	0	0	0	0.248894	0.497788	0	-0.582834	19.5388	9.85758e-06	0.000588916
	ENSMUSG00000082926.3	Gm8172	1.2353	0	0	1.31867	0.24178	0.197605	0	0	0	0	0.299335	0.55915	0.039521	-0.584841	12.0883	0.000507403	0.0131838
	ENSMUSG00000100018.1	Gm7776	2.50633	0	0	0	0	0	0	0	0	0	0.250633	0.501266	0	-0.58618	17.9247	2.29824e-05	0.00116951
	ENSMUSG00000094530.2	Gm21399	0	0	0	2.50686	0	0	0	0	0	0	0.250686	0.501372	0	-0.586281	12.5152	0.000403658	0.0112002
	ENSMUSG00000022598.6	Psca	0	0.437135	0.155759	1.66179	0.462017	0	0.13629	0	0	0	0.285299	0.54334	0.027258	-0.587258	13.4332	0.000247213	0.00778177
	ENSMUSG00000098456.1	Gm12117	0.377833	0.428194	0.449112	1.07172	0.90299	0	0	0	0	0.46287	0.369272	0.64597	0.092574	-0.591207	16.4243	5.06312e-05	0.00219671
	ENSMUSG00000083076.1	Gm11408	0	0	0	2.54321	0	0	0	0	0	0	0.254321	0.508642	0	-0.59325	10.4308	0.00123931	0.0262507
	ENSMUSG00000031576.16	Kcnu1	0.95953	0.39721	0.211521	0	1.00018	0	0	0	0	0	0.256844	0.513688	0	-0.598068	27.1557	1.87712e-07	2.07803e-05
	ENSMUSG00000022603.9	Mroh4	0.533085	0	0.115295	0.222084	3.25232	0.027802	0	0.574056	0	0.424157	0.51488	0.824557	0.205203	-0.59827	11.9351	0.000550867	0.014156
	ENSMUSG00000029755.10	Dlx5	0.704277	0	0.088994	0	1.79479	0	0	0	0	0	0.258806	0.517612	0	-0.601803	26.8786	2.16645e-07	2.33405e-05
	ENSMUSG00000091155.1	Serpine3	0.835308	0.386452	0.083011	1.57185	0	0	0	0	0	0.166459	0.304308	0.575324	0.0332918	-0.608401	21.2798	3.96898e-06	0.00026965
	ENSMUSG00000110776.1	Gm2829	2.25295	0	0.374102	0	0	0	0	0	0	0	0.262705	0.52541	0	-0.609197	10.865	0.000979993	0.0221349
	ENSMUSG00000026579.8	F5	1.19079	0.173863	0.964632	0.741234	1.27277	0.254606	0.069654	0.329362	0	0.454335	0.545125	0.868658	0.221591	-0.613241	10.6891	0.00107766	0.0237168
	ENSMUSG00000091779.8	Gm21293	2.79556	0	0	0.127014	0	0	0	0	0.172048	0	0.309462	0.584515	0.0344096	-0.615234	15.128	0.000100465	0.00381543
	ENSMUSG00000052131.7	Akr1b7	0.066713	0	0.092677	1.06775	1.46669	0	0	0	0	0	0.269383	0.538766	0	-0.621774	25.8727	3.64695e-07	3.71167e-05
	ENSMUSG00000058618.6	AY761184	0	0	0	2.69595	0	0	0	0	0	0	0.269595	0.53919	0	-0.622171	10.4298	0.00124	0.0262507
	ENSMUSG00000045551.7	Fpr1	0.768302	0.580254	0.978936	0.219746	0.968302	0.14708	0	0	0	0.357076	0.40197	0.703108	0.100831	-0.629577	12.9664	0.000317128	0.0093967
	ENSMUSG00000073906.3	Olfr692	0.943295	0.101587	0	0	1.72365	0	0	0	0	0	0.276853	0.553706	0	-0.635714	24.9194	5.97788e-07	5.59726e-05
	ENSMUSG00000079722.1	Ttll2	0.300085	0.324338	0.488097	0.91902	1.51753	0.057618	0.060652	0.377497	0	0	0.404484	0.709814	0.0991534	-0.637447	12.8219	0.000342587	0.00990041
	ENSMUSG00000092390.1	Gm20541	0.297286	0.385117	0	0	2.94588	0.410155	0.072022	0.06408	0	0	0.417454	0.725657	0.109251	-0.637559	10.5929	0.00113522	0.0246673
	ENSMUSG00000101357.1	Gm2495	0	0	0	2.78358	0	0	0	0	0	0	0.278358	0.556716	0	-0.638506	9.47517	0.00208271	0.0388631
	ENSMUSG00000073293.4	Nudt10	0.994409	0.340575	0.37689	0	2.01514	0.155714	0	0.414573	0	0	0.42973	0.745403	0.114057	-0.647736	12.9857	0.000313883	0.00932199
	ENSMUSG00000037827.5	Gm5884	1.25337	1.70133	0	0	0	0	0.060133	0	0	1e-06	0.301483	0.59094	0.0120268	-0.652632	27.2897	1.75138e-07	1.98662e-05
	ENSMUSG00000099242.1	Obox4-ps3	0	0	0	2.53392	0.341604	0	0	0	0	0	0.287552	0.575105	0	-0.655448	11.3461	0.000756084	0.0181642
	ENSMUSG00000043029.2	Trpv3	0.711434	0.255553	0.448499	1.84805	1.51642	0.113836	0.210154	0.477663	0.098166	0.240631	0.592041	0.955991	0.22809	-0.671484	10.8078	0.00101071	0.02265
	ENSMUSG00000091221.1	Gm3084	0	0	0	3.31	0	0	0	0.214031	0	0	0.352403	0.662	0.0428062	-0.672449	10.2533	0.00136441	0.0283554
	ENSMUSG00000025529.14	Zfp711	0.689947	0.542327	1.06472	1.63818	1.05257	0.20967	0.30804	0.502744	0	0.233927	0.624212	0.997549	0.250876	-0.675292	10.3891	0.00126764	0.0267107
	ENSMUSG00000031443.7	F7	0	0.166094	0.833731	1.37418	2.23879	0.196834	0.155294	0.368017	0	0.298018	0.563096	0.922559	0.203633	-0.675633	9.07779	0.00258733	0.0464258
	ENSMUSG00000018211.13	Wfdc15b	0	0	0.754058	0	2.23358	0	0	0	0	0	0.298764	0.597528	0	-0.675841	9.50987	0.00204369	0.0385517
	ENSMUSG00000037537.6	H2-M11	1.36795	0.11767	1.26029	0.310699	0.623165	0.10415	0	0.196265	0	0.126773	0.410696	0.735955	0.0854376	-0.677453	13.356	0.000257599	0.00803991
	ENSMUSG00000073830.11	Mup14	0	0	3.03042	0	0	0	0	0	0	0	0.303042	0.606084	0	-0.683547	18.175	2.0151e-05	0.0010419
	ENSMUSG00000038357.10	Camp	0	1.22388	0.746097	1.98737	0.184391	0	0.654238	0	0	0	0.479598	0.828348	0.130848	-0.693136	8.932	0.00280218	0.0494825
	ENSMUSG00000027344.14	Fsip1	0.248325	0.239976	0.630078	1.69746	1.4556	0.055605	0.107359	0	0	0.560706	0.499511	0.854288	0.144734	-0.695853	10.7479	0.00104399	0.023154
	ENSMUSG00000071613.11	Gm10340	0.995397	0.311803	0.097033	2.36027	0.602927	0	0.176973	0.364973	0	0.236168	0.514554	0.873486	0.155623	-0.697055	13.5361	0.000234023	0.00747624
	ENSMUSG00000112298.1	Gm48088	0	1.92295	1.20867	0	0	0	0	0	0	0	0.313162	0.626324	0	-0.701615	9.66301	0.00188015	0.0362095
	ENSMUSG00000107272.1	Gm34583	1.75309	0	1.379	0	0	0	0	0	0	0	0.313209	0.626418	0	-0.701698	9.78769	0.00175684	0.0343484
	ENSMUSG00000064147.6	Rab44	0.886935	0.330322	1.29497	1.73485	1.13353	0.12346	0.194358	0.552594	0	0.497197	0.674822	1.07612	0.273522	-0.705067	9.28452	0.00231099	0.0421184
	ENSMUSG00000034645.14	Zyg11a	0.03372	0.043823	0.990701	0.505749	2.56743	0.03898	0.119091	0.254718	0	0.188689	0.47429	0.828285	0.120296	-0.706611	13.8662	0.0001963	0.00652197
	ENSMUSG00000048478.7	Spata33	0.738258	0.381915	0.722419	3.86268	2.01137	0.041529	1.58253	0.879568	0.020276	0.213925	1.04545	1.54333	0.547566	-0.716717	9.40933	0.00215884	0.0397624
	ENSMUSG00000105111.1	Gm43310	0	0.155896	0.16653	2.73214	1.31717	0	0.437475	0.26055	0	0	0.506976	0.874347	0.139605	-0.717854	9.42767	0.00213735	0.0394514
	ENSMUSG00000053025.13	Sv2b	1.57998	0.724205	0.284584	1.63344	1.31216	0.075322	0.322235	0.510419	0	0.488615	0.693096	1.10687	0.279318	-0.719729	11.6515	0.000641497	0.016068
	ENSMUSG00000054191.8	Klf1	0	1.11317	0.299049	0.738868	1.77495	0.061778	0.065054	0.173569	0	0.074913	0.430135	0.785207	0.0750628	-0.731671	16.3986	5.13243e-05	0.00222109
	ENSMUSG00000028539.14	Artn	1.63693	0.231188	0.21786	0.299068	4.36713	0.411214	0	1.65789	0	0	0.882128	1.35044	0.413821	-0.733329	11.5597	0.000673978	0.0167189
	ENSMUSG00000081265.1	Gm11282	0.298064	0	0.497636	2.25333	1.31266	0.068536	0	0.128495	0	0.415787	0.497451	0.872338	0.122564	-0.738044	14.3341	0.000153066	0.00533327
	ENSMUSG00000081494.1	Gm14130	0	0	0	3.29131	0.639014	0	0	0.201295	0	0.130051	0.426167	0.786065	0.0662692	-0.744213	15.4536	8.45544e-05	0.0033088
	ENSMUSG00000111920.1	Gm7370	0.401587	1.20279	0.183348	1.35249	0.543706	0.151516	0	0	0	0	0.383544	0.736784	0.0303032	-0.75335	15.322	9.06523e-05	0.00351009
	ENSMUSG00000110139.1	Gm45783	2.90764	0	0	1.33072	0	0	0	0	0	0.471397	0.470976	0.847672	0.0942794	-0.755728	13.197	0.000280403	0.00866759
	ENSMUSG00000084018.1	Gm11895	0	0	0	3.46435	0	0	0	0	0	0	0.346435	0.69287	0	-0.759471	11.3476	0.000755456	0.0181642
	ENSMUSG00000000411.7	Tssk3	0.400669	0.432139	0.371064	2.36656	0.825807	0	0.323279	0.215832	0	0	0.493535	0.879248	0.107822	-0.762429	14.8672	0.000115352	0.00423106
	ENSMUSG00000030030.5	1700003E16Rik	0.037685	0.591148	0.790182	1.53216	2.72991	0.478813	0.091537	0.325274	0	0.31767	0.689438	1.13622	0.242659	-0.781628	9.74267	0.00180039	0.0350402
	ENSMUSG00000053830.4	Gm9923	0	0	0	2.45805	1.15311	0	0	0	0	0	0.361116	0.722232	0	-0.784279	39.4409	3.38133e-10	1.16088e-07
	ENSMUSG00000101618.1	Gm18443	0.684345	0.289378	0	1.49848	1.21032	0	0	0	0	0	0.368252	0.736505	0	-0.796186	14.8762	0.000114801	0.00421684
	ENSMUSG00000098678.1	Mroh6	0.139508	0.271928	0.975658	2.77527	1.30314	0.282163	0.16949	0.564522	0	0	0.648168	1.0931	0.203235	-0.798723	12.0966	0.000505151	0.0131518
	ENSMUSG00000060268.11	Gm1661	0.345931	0.168394	0.660142	0.791796	2.40303	0.269729	0	0.093282	0	0	0.47323	0.873859	0.0726022	-0.804897	20.4813	6.02164e-06	0.000383953
	ENSMUSG00000058873.1	Gm5582	0	0	0	3.73998	0	0	0	0	0	0	0.373998	0.747996	0	-0.805702	14.2108	0.000163432	0.00563348
	ENSMUSG00000024973.16	Hrasls5	0.088711	0.801487	1.70526	2.01622	0.538517	0.101363	0.214166	0.215908	0	0.246701	0.592833	1.03004	0.155628	-0.812831	12.8504	0.000337413	0.00987279
	ENSMUSG00000019359.14	Gdpd2	0.157431	0.152077	0.161768	2.82425	1.94016	0.036416	0.038269	0.541502	0	0.16376	0.601563	1.04714	0.155989	-0.82448	13.5026	0.000238232	0.00753592
	ENSMUSG00000096094.2	A630095N17Rik	2.26889	0	0	0	2.90252	0	0.258281	0.186957	0	0.297873	0.591452	1.03428	0.148622	-0.824615	9.30083	0.0022905	0.0417989
	ENSMUSG00000103125.1	Gm37388	0	1.4455	0	0	2.41504	0	0	0	0	0	0.386054	0.772108	0	-0.825467	9.21669	0.00239819	0.0434865
	ENSMUSG00000028801.14	Stpg1	0	0.08367	0.749773	0.998989	2.69106	0	0	0.058918	0	0.312413	0.489482	0.904698	0.0742662	-0.826211	16.2226	5.63187e-05	0.00238512
	ENSMUSG00000021278.7	Amn	0.267172	0.961978	1.05601	0.163131	3.16594	0.101752	0.401768	0.102045	0	0.371485	0.659128	1.12285	0.19541	-0.828494	11.804	0.000591031	0.0149347
	ENSMUSG00000046240.8	Hepacam	1.13213	0.345371	0.930435	2.37995	1.47303	0.076879	0.107625	0.978929	0	0.154873	0.757922	1.25218	0.263661	-0.833714	12.5786	0.000390179	0.0109203
	ENSMUSG00000029123.8	Stk32b	3.23339	0.794876	0.801397	1.83331	1.19927	0.547211	0.389412	0.880131	0	0.396155	1.00752	1.57245	0.442582	-0.834489	10.0519	0.00152189	0.0309535
	ENSMUSG00000041372.10	B4galnt3	0.784206	0.29621	0.343113	1.70272	3.31705	0.094501	0.124006	0.98317	0	0.212536	0.785751	1.28866	0.282843	-0.835159	10.7405	0.00104816	0.0232263
	ENSMUSG00000048373.8	Fgfbp1	0.906786	0	0.195315	0.60326	2.69434	0	0	0.162751	0	0.105225	0.466768	0.87994	0.0535952	-0.835366	21.6222	3.31983e-06	0.000232922
	ENSMUSG00000050762.5	Prss27	0.068588	0.266249	0.476216	1.56742	2.82615	0.236113	0.082992	0.369435	0	0	0.589316	1.04092	0.137708	-0.843093	13.1245	0.000291462	0.00890255
	ENSMUSG00000006216.10	Clcnkb	0.336578	0.37829	1.22655	9.01695	7.07229	1.40182	0.407057	5.83315	0	0.090486	2.57632	3.60613	1.5465	-0.855038	9.93642	0.0016204	0.0325713
	ENSMUSG00000035964.8	Tmem59l	0	0.508204	0	0.477897	3.07565	0	0	0	0	0	0.406175	0.81235	0	-0.857862	27.2699	1.76949e-07	1.99836e-05
	ENSMUSG00000059187.12	Fam19a1	3.07258	1.5707	0.11075	1.33173	2.28778	0	0.193913	1.30685	0	0.870809	1.07451	1.67471	0.474314	-0.859337	10.6462	0.00110297	0.0241773
	ENSMUSG00000084343.1	Gm16198	0	0	0	3.86304	0.888769	0	0	0.354203	0	0	0.510601	0.950362	0.0708406	-0.864998	13.1411	0.000288892	0.00884504
	ENSMUSG00000026611.17	Spata17	2.02337	0.111912	0.274082	1.76099	1.35043	0	0	0.493937	0	0.278835	0.629356	1.10416	0.154554	-0.865906	16.1013	6.00421e-05	0.00249761
	ENSMUSG00000109611.1	Gm45473	1.52049	0.360991	0	2.52212	1.77927	0	0.226687	0.813703	0	0	0.722326	1.23657	0.208078	-0.888577	9.28428	0.00231128	0.0421184
	ENSMUSG00000026840.14	Lamc3	0.529986	0.396549	6.07202	6.07596	3.94715	4.00967	0.303029	1.05796	0	1.49836	2.38907	3.40433	1.3738	-0.891723	9.59541	0.00195064	0.0372328
	ENSMUSG00000037025.11	Foxa2	2.85136	0	0.733633	0	0.815359	0	0	0.040659	0	0	0.444101	0.88007	0.0081318	-0.899102	25.2898	4.93303e-07	4.84812e-05
	ENSMUSG00000104733.1	Gm29784	0	0	0	0.941759	3.45672	0	0	0	0	0	0.439848	0.879696	0	-0.910499	9.46651	0.00209257	0.0388757
	ENSMUSG00000052854.15	Nrk	1.09427	0.505723	1.00421	0.925672	4.55245	0.344132	0.541946	0.453991	0	0.6043	1.00267	1.61647	0.388874	-0.913703	10.0355	0.00153549	0.0312055
	ENSMUSG00000049036.7	Tmem121	0.414996	0.941706	0.433757	0.774084	5.07753	0.597373	0.377367	0.559289	0	0.14485	0.932095	1.52841	0.335776	-0.920555	9.22317	0.00238972	0.0434248
	ENSMUSG00000084390.1	Gm15425	4.87249	0	0.624051	1.19035	0.887589	0.193366	0.101693	0.931703	0	0.390187	0.919143	1.5149	0.32339	-0.926261	15.239	9.47244e-05	0.00362583
	ENSMUSG00000023999.14	Kif6	0.288879	0.027193	0.205143	1.47905	4.9285	0.221953	0.058401	0.508931	0	0.450258	0.816831	1.38575	0.247909	-0.934932	10.571	0.00114879	0.0248781
	ENSMUSG00000092300.7	Cdk3-ps	1.03781	3.18646	2.28851	1.56896	2.40447	0.94567	0.66673	0.111584	0	1.36369	1.35739	2.09724	0.617535	-0.937187	9.08475	0.0025775	0.0462817
	ENSMUSG00000062542.11	Syt9	0.689552	0.447564	0.996677	2.82328	3.56175	0.472253	0.210262	0.994916	0	0.304261	1.05005	1.70376	0.396338	-0.953321	12.5426	0.000397788	0.0110851
	ENSMUSG00000084157.2	Gm15576	3.76675	0.798241	0	0.230244	1.68931	0.233182	0	0.223754	0.153255	0.287179	0.738192	1.29691	0.179474	-0.96155	11.0682	0.000878215	0.0204459
	ENSMUSG00000116478.1	AC138177.4	1.1213	0.640372	1.53868	2.52389	0.676103	0.141295	0	0.401444	0	0.345136	0.738822	1.30007	0.177575	-0.965858	13.1904	0.00028138	0.00867694
	ENSMUSG00000016526.8	Dyrk3	1.17679	0.581156	1.38576	1.49657	3.00008	0.354007	0.257354	0.609059	0	0.230435	0.909121	1.52807	0.290171	-0.970475	10.9274	0.00094754	0.0216873
	ENSMUSG00000050164.11	Mchr1	1.0963	0.183807	0.642972	3.01756	1.9084	0.040868	0.128886	0.648716	0	0.197858	0.786537	1.36981	0.203266	-0.977815	16.9531	3.83144e-05	0.00176803
	ENSMUSG00000096330.8	Gm21976	1.81856	1.90966	1.00877	0	2.9889	0	0.595984	0.300255	0	0.530035	0.915216	1.54518	0.285255	-0.985712	9.38697	0.00218533	0.0401355
	ENSMUSG00000082600.1	Gm9673	0.39087	2.34217	1.42857	0.292812	2.11846	0	0.469496	0	0	0.360701	0.740308	1.31458	0.166039	-0.989132	12.7943	0.000347673	0.0100137
	ENSMUSG00000103392.1	Gm38303	0	0	0	2.07613	2.84887	0	0	0	0	0	0.4925	0.985	0	-0.989139	16.6497	4.49584e-05	0.00200283
	ENSMUSG00000046487.6	Mospd4	0	0.543508	2.01608	0	2.84526	0.238063	0	0	0	0	0.564291	1.08097	0.0476126	-0.990151	12.888	0.000330693	0.00968717
	ENSMUSG00000049538.14	Adamts16	1.43035	0.284358	0.117467	0.0462	5.1155	0.237333	0.070465	0.544437	0	0.155158	0.800127	1.39878	0.201479	-0.997487	17.1497	3.4547e-05	0.00162624
	ENSMUSG00000022582.4	Ly6g	0	0.257374	0.688604	0.678679	3.85569	0	0	0.107369	0	0.138662	0.572638	1.09607	0.0492062	-0.998388	9.36423	0.0022126	0.0404633
	ENSMUSG00000079495.2	Nat8f6	2.21155	1.04862	2.06075	3.43484	1.45669	0.654221	0.412905	0.559888	0.044588	0.936316	1.28204	2.04249	0.521584	-0.999679	9.94427	0.00161351	0.032458
	ENSMUSG00000035984.14	Nme5	1.96656	0.420002	0.916527	1.18277	2.5856	0.395785	0	0.125197	0	0.482177	0.807462	1.41429	0.200632	-1.00781	12.8385	0.000339559	0.00989193
	ENSMUSG00000083661.1	Gm11473	5.06571	0	0	0	0	0	0	0	0	0	0.506571	1.01314	0	-1.00945	9.87133	0.00167874	0.0333276
	ENSMUSG00000079330.8	Lemd1	0.749169	0.319769	0.884994	0.498879	4.58006	0.275535	0.1571	0.372357	0	0.171154	0.800902	1.40657	0.195229	-1.00969	11.8418	0.000579147	0.0147149
	ENSMUSG00000095612.2	Ighv5-4	0	0	5.11452	0	0	0	0	0	0	0	0.511452	1.0229	0	-1.01643	11.3497	0.000754587	0.0181642
	ENSMUSG00000075296.4	Aldh3b2	0.398917	0.329819	0.991565	3.80437	2.2933	0.175161	0.352413	0.547821	0	0.253597	0.914696	1.56359	0.265798	-1.01812	14.4958	0.000140472	0.00498211
	ENSMUSG00000059434.8	Gckr	0.440803	1.31314	2.28583	2.50371	4.0909	0.359232	1.57943	0.358157	0	0.380583	1.33118	2.12688	0.53548	-1.02603	9.37325	0.00220174	0.0403274
	ENSMUSG00000043668.13	Tox3	0.507114	1.14559	0.618497	6.7123	0.981251	0.672783	1.1154	0.285685	0	0.24708	1.22857	1.99295	0.46419	-1.03147	13.2048	0.000279232	0.00864176
	ENSMUSG00000051839.7	Gypa	3.82188	0.167236	0.2998	1.68005	0.237275	0.049545	0.052121	0.324236	0	0	0.663214	1.24125	0.0851804	-1.04637	29.3437	6.06132e-08	8.34615e-06
	ENSMUSG00000079889.4	Gm11951	0	0	0	5.33758	0	0	0	0	0	0	0.533758	1.06752	0	-1.0479	13.9071	0.000192071	0.0063952
	ENSMUSG00000045284.9	Dcaf12l1	0.316518	0.357082	0.736916	1.75639	5.66818	0.391347	0.41086	0.569633	0	0.29561	1.05025	1.76702	0.33349	-1.05312	12.7349	0.000358894	0.0102679
	ENSMUSG00000030144.4	Clec4d	2.19036	1.17926	1.80209	1.11885	3.99074	0.22661	0	0.554475	0	1.52813	1.25905	2.05626	0.461843	-1.06398	10.0199	0.00154859	0.0314468
	ENSMUSG00000113473.1	Gm7045	1.76453	0.998802	3.18041	2.16465	1.30931	0.219063	0.701021	0.419554	0	0.538887	1.12962	1.88354	0.375705	-1.06767	9.40555	0.0021633	0.0398161
	ENSMUSG00000055298.6	Ctsj	0	0	0.280732	1.46311	4.25277	0	0	0.14516	0	0.093899	0.623567	1.19932	0.0478118	-1.06968	13.0213	0.000307969	0.00917797
	ENSMUSG00000081617.1	Rps13-ps7	0	0	0.763281	4.83004	0	0	0	0	0	0	0.559332	1.11866	0	-1.08315	10.4633	0.00121767	0.0259982
	ENSMUSG00000114779.1	Gm17940	3.59906	3.02582	1.35978	3.31302	0.503647	0.282121	0.742105	0.532456	0	1.36872	1.47267	2.36027	0.58508	-1.08402	10.1165	0.00146949	0.0301168
	ENSMUSG00000089972.3	Gm16318	2.18168	0	1.6079	1.53192	3.70679	0	0.236323	1.06093	0	0.272503	1.0598	1.80566	0.313951	-1.09443	10.1637	0.00143234	0.0295287
	ENSMUSG00000092210.1	A930009A15Rik	2.47885	0.118452	0.380579	2.29339	1.25453	0	0	0	0	0.382848	0.690865	1.30516	0.0765696	-1.09843	25.0638	5.54634e-07	5.26984e-05
	ENSMUSG00000109290.1	Phgdh-ps1	2.36575	1.95636	0.563941	2.15682	0	0.157352	0	0.442296	0	0	0.764252	1.40857	0.11993	-1.10477	17.5542	2.79239e-05	0.00136955
	ENSMUSG00000072675.12	Duxbl2	0.136236	1.78394	1.12443	3.75238	1.52715	0.038439	0.758172	0.171202	0.079134	0.085608	0.945669	1.66483	0.226511	-1.11948	13.5385	0.000233722	0.0074759
	ENSMUSG00000061718.12	Ppp1r1b	1.53202	0.677053	0.722319	6.61429	2.07649	0.298487	0.158281	1.11442	0	1.06033	1.42537	2.32443	0.526304	-1.12307	19.062	1.26538e-05	0.000720848
	ENSMUSG00000106403.1	Igkv20-101-2	5.96408	0	0	0	0	0	0	0	0	0	0.596408	1.19282	0	-1.13278	9.87133	0.00167874	0.0333276
	ENSMUSG00000108815.1	AC149222.1	0	0	0	2.2542	5.62666	0.293934	0	0.575148	0	0	0.874994	1.57617	0.173816	-1.13402	20.8425	4.98635e-06	0.000328372
	ENSMUSG00000092523.1	Gm18191	0	0	0	6.91944	0	0.410051	0	0	0	0	0.732949	1.38389	0.0820102	-1.1396	20.4805	6.02419e-06	0.000383953
	ENSMUSG00000041556.8	Fbxo2	0.397561	0.857629	1.19674	1.59095	6.10068	0.456425	0.561384	0.142776	0	0.646536	1.19507	2.02871	0.361424	-1.15359	12.3962	0.000430207	0.0118096
	ENSMUSG00000074766.10	Ism1	3.25608	1.11654	1.66277	2.56837	5.18072	0.412277	0.828926	1.41699	0	0.777576	1.72202	2.7569	0.687154	-1.15495	10.8511	0.000987365	0.0222819
	ENSMUSG00000092247.2	Gm20426	6.63617	1.17409	0.610087	0	0.478553	0	0	0.501833	0	0.635502	1.00362	1.77978	0.227467	-1.17929	9.97379	0.00158784	0.0320921
	ENSMUSG00000034687.8	Fras1	0.822732	0.348072	1.12106	4.54714	8.28618	0.127467	0.732347	1.85011	0.271463	0.889352	1.89959	3.02504	0.774148	-1.18188	10.6303	0.0011125	0.0242761
	ENSMUSG00000054986.13	Sec14l3	6.76835	0.699114	1.73441	4.55001	1.60644	0.78211	0.825681	1.31955	0	0.993315	1.9279	3.07166	0.784131	-1.1904	12.1258	0.000497301	0.012987
	ENSMUSG00000115232.1	AC174678.2	7.11986	3.12324	1.33695	4.95211	4.2387	0.27475	1.7221	1.76695	0	2.49458	2.70292	4.15417	1.25168	-1.19474	9.64168	0.00190211	0.0365165
	ENSMUSG00000020932.14	Gfap	1.86846	0	0.800488	3.07249	3.83987	0.683242	0.069488	0.185074	0	0.400001	1.09191	1.91626	0.267561	-1.20206	15.3514	8.9256e-05	0.00346644
	ENSMUSG00000016179.11	Camk1g	1.09892	0.695338	1.35532	1.83292	11.0152	0.992564	0.886466	1.32689	0	0.893185	2.00968	3.19954	0.819821	-1.20643	9.00081	0.0026986	0.047991
	ENSMUSG00000049832.6	Rbx1-ps	0	0	0	6.67553	0	0	0	0	0	0	0.667553	1.33511	0	-1.22349	9.36174	0.00221562	0.0404896
	ENSMUSG00000091105.1	Mrto4-ps2	0	2.69884	1.62364	1.43069	2.78511	0.776932	0	0	0	0	0.931521	1.70766	0.155386	-1.22867	12.4139	0.000426152	0.0117233
	ENSMUSG00000079092.4	Prl2c2	0	1.98416	3.6252	0	2.10789	0.421369	0	0	0	0	0.813862	1.54345	0.0842738	-1.23006	11.8904	0.000564233	0.0144561
	ENSMUSG00000023911.12	Flywch2	0	1.078	1.70326	3.66014	10.0036	0.351932	2.80209	0.334953	0	0.646764	2.05807	3.289	0.827148	-1.23105	11.7741	0.000600604	0.0151617
	ENSMUSG00000054046.7	Klk13	5.1505	0.571382	1.53631	3.85665	3.78624	0.374321	0.32054	2.49769	0.034748	0.246056	1.83744	2.98022	0.694671	-1.23184	18.8932	1.38243e-05	0.000773831
	ENSMUSG00000021613.9	Hapln1	1.43943	0.967859	1.11427	1.8267	10.5279	0.913562	0.822127	0.718617	0.050742	1.36287	1.97441	3.17523	0.773584	-1.23519	12.0924	0.000506281	0.0131679
	ENSMUSG00000022621.16	Rabl2	12.2625	5.33568	7.72307	21.1044	34.894	13.6084	2.57216	10.0562	0	5.32302	11.2879	16.2639	6.31196	-1.23943	9.56334	0.00198502	0.0376656
	ENSMUSG00000049699.4	Ucn2	1.55963	1.13042	2.09181	1.22177	5.91278	0.28289	0.215662	1.13835	0	0.481607	1.40349	2.38328	0.423702	-1.24878	12.9473	0.000320378	0.00948208
	ENSMUSG00000083382.1	Gm6433	2.54718	1.01077	1.25009	9.70865	2.65347	0.516526	0.408006	2.07302	0	1.25484	2.14226	3.43403	0.850478	-1.26072	10.111	0.00147388	0.0301543
	ENSMUSG00000109620.1	Gm48810	0	0.432161	0.453199	6.97623	2.68332	0.374669	0	1.10053	0	0	1.20201	2.10898	0.29504	-1.26345	9.82465	0.00172189	0.0338967
	ENSMUSG00000032854.12	Ugt8a	36.6069	3.31127	4.66401	11.0852	5.75321	0.831218	3.4145	15.3092	0	3.08162	8.40571	12.2841	4.52731	-1.26505	9.01468	0.0026782	0.0477569
	ENSMUSG00000090186.5	Gm7592	0	0	1.46261	7.23151	2.38659	0	0	0.988728	0	0.645962	1.27154	2.21614	0.326938	-1.27723	12.7956	0.000347436	0.0100137
	ENSMUSG00000106243.1	Gm5050	0.790783	1.35362	0.722932	0.592162	8.03638	0.149244	0.158281	1.13202	0	0.364813	1.33002	2.29918	0.360872	-1.27757	12.1655	0.000486803	0.0127645
	ENSMUSG00000063885.5	Gm6498	1.66572	0.133095	2.24561	9.32442	1.19415	0.664373	0.330154	1.22209	0	0.773882	1.75535	2.9126	0.5981	-1.29177	12.2978	0.000453494	0.0122681
	ENSMUSG00000039543.16	Cfap70	2.00718	0.10596	1.73285	0.282722	5.00459	0.024658	0	0.388718	0	0.310834	0.985751	1.82666	0.144842	-1.30395	11.936	0.000550586	0.014156
	ENSMUSG00000038067.2	Csf3	0	0.229682	0.986774	8.19192	3.82303	1.35901	0.286358	0.57324	0	0.082443	1.55325	2.64628	0.46021	-1.32025	13.3712	0.00025552	0.00799438
	ENSMUSG00000083615.1	Gm12878	1.58252	5.93574	0	0	0	0	0	0	0	0	0.751826	1.50365	0	-1.32403	9.63727	0.00190669	0.0365565
	ENSMUSG00000032105.5	Pdzd3	0.070583	0.504431	0.444222	4.06411	3.96706	0.040784	0.171494	0.342729	0	0	0.960541	1.81008	0.111001	-1.33875	9.78988	0.00175475	0.0343484
	ENSMUSG00000017453.4	Pipox	1.14581	0.209351	2.84442	0.316417	12.2001	1.13271	0.618505	1.51357	0	0.274332	2.02552	3.34322	0.707823	-1.34661	9.70983	0.00183285	0.0354843
	ENSMUSG00000102962.1	Gm37944	0	1.60529	4.46139	0	1.64951	0	0	0	0	0	0.771619	1.54324	0	-1.34667	14.9333	0.000111382	0.00411476
	ENSMUSG00000043687.15	1190005I06Rik	0.581603	0.3127	1.01175	0	9.75846	0.264289	0.419851	0.374956	0	0.483779	1.32074	2.3329	0.308575	-1.34878	12.1225	0.000498159	0.012987
	ENSMUSG00000066714.6	Gm8062	0.363513	0	0.475851	3.46393	9.86198	0	0	0	0	2.45567	1.66209	2.83305	0.491134	-1.36208	9.82703	0.00171965	0.0338786
	ENSMUSG00000021469.9	Msx2	1.31753	1.677	2.16676	11.3783	3.87618	0.890578	0.993253	1.35326	0.024953	1.61693	2.52947	4.08315	0.975795	-1.36329	10.8284	0.000999575	0.0224787
	ENSMUSG00000115882.1	AC112943.1	0	0	0	7.95052	0	0	0	0	0	0	0.795052	1.5901	0	-1.37301	12.2315	0.000469902	0.0124948
	ENSMUSG00000108398.1	Gm30191	3.67451	0.446879	0.237581	6.02254	2.34776	0.392728	0.418141	0.749726	0	0.241025	1.45309	2.54585	0.360324	-1.38218	15.0406	0.000105221	0.00394373
	ENSMUSG00000044641.7	Pard6b	2.26166	2.15125	3.47742	9.66527	9.68864	1.7895	1.56126	1.96102	0.069391	1.94965	3.45751	5.44885	1.46616	-1.38677	9.12949	0.00251522	0.0452897
	ENSMUSG00000025804.5	Ccr1	4.34999	0.82809	1.74684	1.07307	9.7084	0.644912	0.419342	1.37441	0	1.15122	2.12963	3.54128	0.717977	-1.40239	13.6729	0.000217567	0.00707683
	ENSMUSG00000025515.15	Muc2	4.17566	3.85554	4.04455	2.58561	2.63379	0.141965	1.50815	1.37922	0	0.146952	2.04714	3.45903	0.635257	-1.44721	13.0452	0.000304057	0.0091249
	ENSMUSG00000024972.16	Lgals12	4.30161	1.17665	5.48574	5.87412	6.16497	1.04071	1.71226	1.8193	0	0.653044	2.82284	4.60062	1.04506	-1.45344	12.048	0.000518475	0.0134308
	ENSMUSG00000029699.13	Ssc4d	0.146277	2.07428	1.47756	5.3231	13.28	0.366074	1.97612	1.96931	0	0.603166	2.72159	4.46024	0.982934	-1.46133	10.896	0.000963708	0.0218652
	ENSMUSG00000030077.11	Chl1	13.8717	3.29407	2.15642	4.87543	18.0098	1.24445	1.70211	5.87376	1.02364	2.07514	5.41265	8.44148	2.38382	-1.48036	10.4571	0.00122176	0.0260639
	ENSMUSG00000106372.1	Igkv14-126-1	0	0.873479	7.20237	0	0.88301	0	0	0	0	0	0.895886	1.79177	0	-1.48118	11.5448	0.000679389	0.0168369
	ENSMUSG00000104707.1	Gm43649	10.0023	1.85635	3.21032	0	3.79479	0	0	2.11809	0	1.33991	2.23218	3.77275	0.6916	-1.49643	10.3922	0.00126549	0.0266873
	ENSMUSG00000049721.14	Gal3st1	2.64527	0.800582	0.567271	3.61786	12.8914	0.175781	0.664688	2.81261	0	0.383849	2.45593	4.10448	0.807386	-1.49786	13.017	0.000308677	0.00917797
	ENSMUSG00000035283.4	Adrb1	1.65156	1.98824	2.48346	14.3016	5.59213	0.636842	1.30117	1.94758	0	2.05446	3.1957	5.2034	1.18801	-1.50344	12.0167	0.000527258	0.0136172
	ENSMUSG00000005148.8	Klf5	12.188	2.28425	2.99896	12.1096	12.6408	1.55426	1.4837	5.79379	0.105651	2.70284	5.38619	8.44432	2.32805	-1.50477	10.2498	0.00136697	0.0283855
	ENSMUSG00000101376.1	Gm18291	5.18346	0	4.14649	0	0	0	0	0	0	0	0.932995	1.86599	0	-1.51903	9.78769	0.00175684	0.0343484
	ENSMUSG00000022651.5	Retnlg	0	0.990489	9.98885	2.57656	5.97359	0.434537	0.463453	2.08006	0	0.534388	2.30419	3.9059	0.702488	-1.52687	11.1131	0.000857216	0.0200632
	ENSMUSG00000028444.17	Cntfr	7.3962	7.20178	19.1229	48.0126	27.342	1.91479	7.20387	17.7222	0.420677	6.73025	14.3067	21.8151	6.79836	-1.54875	12.1508	0.000490656	0.0128524
	ENSMUSG00000025201.7	Bloc1s2-ps	0	5.57063	3.49096	0	4.6967	0	0.046803	1.35663	0	0	1.51617	2.75166	0.280687	-1.55061	11.5845	0.000665048	0.016522
	ENSMUSG00000113996.1	Gm48455	2.07809	2.06685	2.15634	3.48108	6.37915	1.78224	0	0.440461	0	0	1.83842	3.2323	0.44454	-1.55083	10.5866	0.00113913	0.0247105
	ENSMUSG00000107154.1	Gm7041	6.63946	0	0	0	4.04134	0	0	0	0	0.348725	1.10295	2.13616	0.069745	-1.55173	23.5593	1.21121e-06	9.86947e-05
	ENSMUSG00000020098.7	Pcbd1	0	2.31436	3.99996	7.65498	16.1784	1.30883	0.462551	3.31222	0	1.7768	3.70081	6.02954	1.37208	-1.56728	12.3529	0.000440298	0.0119723
	ENSMUSG00000020669.15	Sh3yl1	2.66495	1.20224	5.47388	10.9788	8.57441	1.19908	0.752776	2.8931	0	1.53012	3.52694	5.77886	1.27502	-1.57517	11.7228	0.000617403	0.0155401
	ENSMUSG00000001420.13	Tmem79	1.53141	1.69984	3.09318	9.53716	10.546	0.455388	1.82825	2.69993	0	0.497696	3.18889	5.28152	1.09625	-1.5833	17.1599	3.4361e-05	0.00162341
	ENSMUSG00000036169.6	Sostdc1	27.9291	3.78182	5.63131	29.4913	20.6746	0.568727	1.68638	11.4591	9.76295	2.38026	11.3366	17.5016	5.17148	-1.58396	8.92969	0.00280572	0.0494825
	ENSMUSG00000052974.8	Cyp2f2	2.58956	2.12272	6.64461	6.0324	7.89551	0	0.177484	2.83991	0	2.0754	3.03776	5.05696	1.01856	-1.58527	18.49	1.70794e-05	0.000921964
	ENSMUSG00000020953.17	Coch	2.23712	1.81778	7.5546	0.825004	16.5146	1.74032	1.71733	0.603617	0	2.01384	3.50242	5.78982	1.21502	-1.61605	12.2702	0.000460243	0.0123453
	ENSMUSG00000109597.1	Gm45492	346.041	78.5673	90.3133	203.694	60.8713	43.5739	66.5748	51.0982	14.7848	74.7251	103.024	155.897	50.1514	-1.61698	8.94981	0.00277498	0.0491424
	ENSMUSG00000079297.4	Gm2223	0	0.586119	16.9601	3.67353	13.9624	0	0	0	0	7.96269	4.31448	7.03643	1.59254	-1.63219	11.4169	0.000727774	0.0177625
	ENSMUSG00000081029.1	Gm15077	5.56545	0	0	2.52486	11.647	0	0	1.31423	0	1.65654	2.27081	3.94746	0.594154	-1.6339	10.4758	0.00120947	0.025866
	ENSMUSG00000098428.6	Gm2260	6.73277	12.6291	43.5139	20.1551	16.9014	0	0	3.98486	0	24.8222	12.8739	19.9865	5.76141	-1.63406	8.98561	0.00272114	0.0483218
	ENSMUSG00000060962.12	Dmkn	6.87537	0	2.29107	2.99877	1.35848	0.18936	0	0.54169	0	0.232278	1.4487	2.70474	0.192666	-1.63518	28.9987	7.24267e-08	9.7131e-06
	ENSMUSG00000081008.2	Gm13314	13.1089	6.73941	2.97528	0	0	0.816514	0	0	0	3.12304	2.67631	4.56472	0.787911	-1.63803	10.3125	0.00132135	0.027616
	ENSMUSG00000091655.3	Gm8741	7.67544	0	0	0	3.02518	0	0	0	0	0	1.07006	2.14012	0	-1.65082	19.2873	1.1245e-05	0.000653605
	ENSMUSG00000044405.4	Adig	2.00161	4.15711	23.3014	4.83978	1.92914	0.20391	1.30344	4.38024	0	2.16392	4.42805	7.24581	1.6103	-1.65944	9.44539	0.0021168	0.0391844
	ENSMUSG00000030772.6	Dkk3	9.97829	5.36128	11.1222	23.861	31.5482	1.73588	2.89465	10.679	0.263538	6.8807	10.4325	16.3742	4.49075	-1.66187	9.39291	0.00217826	0.0400343
	ENSMUSG00000022878.5	Adipoq	29.4378	1.22524	56.4728	2.90201	14.715	6.15795	5.11298	16.5305	0	1.32302	13.3877	20.9506	5.82489	-1.68538	9.98575	0.00157757	0.0319597
	ENSMUSG00000107789.1	Gm44965	0	2.14201	0.483346	9.69884	0	0.339336	0	0	0	0	1.26635	2.46484	0.0678672	-1.69806	15.5772	7.92058e-05	0.00315707
	ENSMUSG00000101309.1	Gm29397	58.2236	2.29475	4.05696	15.3025	11.6976	0	13.0697	0	0	11.5891	11.6234	18.3151	4.93176	-1.7032	11.2265	0.000806358	0.0190311
	ENSMUSG00000079225.3	Gm9531	58.8014	8.90121	48.057	35.603	43.9716	0	17.9412	6.593	0	30.8632	25.0732	39.0668	11.0795	-1.72985	10.4881	0.00120148	0.0257593
	ENSMUSG00000108989.1	Gm44984	77.3526	19.5426	28.8503	17.0857	96.2585	7.15905	17.8324	18.7881	0.380113	23.8757	30.7125	47.8179	13.6071	-1.74074	9.60257	0.00194305	0.0371154
	ENSMUSG00000032062.2	2310030G06Rik	5.47173	1.90612	2.7871	14.5958	6.75912	1.12729	1.27463	2.10375	0	1.30543	3.7331	6.30397	1.16222	-1.75617	13.518	0.000236286	0.00751126
	ENSMUSG00000027408.7	Cpxm1	15.7448	16.532	16.2052	14.506	66.7349	5.1698	5.43776	10.9434	3.16273	10.1461	16.4583	25.9446	6.97196	-1.75699	9.0464	0.00263212	0.0470886
	ENSMUSG00000049336.16	Tenm2	6.99337	5.99851	4.37437	29.1142	18.4146	1.73719	1.89746	4.35967	0	7.64273	8.05321	12.979	3.12741	-1.75995	9.21158	0.00240489	0.0435775
	ENSMUSG00000076543.2	Igkv4-74	0	0.606526	13.7598	0	4.3425	0	0	0	0	1.96989	2.06787	3.74177	0.393978	-1.76622	13.0612	0.000301478	0.00905807
	ENSMUSG00000076540.3	Igkv4-80	0	1.71727	10.3001	0	0	0	0	0	0	0	1.20174	2.40347	0	-1.76701	14.7307	0.000124012	0.00447852
	ENSMUSG00000094447.2	9430069I07Rik	16.8912	1.65064	2.9969	9.98803	4.85286	0	1.5449	4.39785	0	1.18781	4.35102	7.27593	1.42611	-1.77027	14.0315	0.000179778	0.00609897
	ENSMUSG00000080834.1	Gm15216	3.8427	0	0	0	8.5761	0	0	0	0	0	1.24188	2.48376	0	-1.80065	9.61392	0.00193108	0.0369417
	ENSMUSG00000030278.11	Cidec	14.6727	0.996404	77.3712	0	10.5343	3.01039	3.16741	19.7346	0.037238	0.065236	12.9589	20.7149	5.20297	-1.80765	10.3645	0.00128464	0.0270246
	ENSMUSG00000028716.15	Pdzk1ip1	2.03993	1.38994	11.3067	6.62972	17.5803	1.08973	0.790703	2.65673	0	2.66	4.61438	7.78932	1.43943	-1.84921	12.4501	0.000417978	0.011523
	ENSMUSG00000069011.5	Gm10254	0	0.806004	0.552828	38.831	41.0641	10.7881	0	8.13672	0	0	10.0179	16.2508	3.78496	-1.85008	9.79607	0.00174885	0.0343226
	ENSMUSG00000112764.1	Gm48158	0	13.0902	0	0	0	0	0	0	0	0	1.30902	2.61804	0	-1.85521	11.4621	0.000710298	0.0174851
	ENSMUSG00000026621.13	Marc1	0.347827	0.099601	1.90447	1.192	15.2921	0.124979	0.33666	1.04911	0	0.05361	2.04004	3.7672	0.312872	-1.86042	23.7673	1.08715e-06	9.11823e-05
	ENSMUSG00000076545.2	Igkv4-72	0	2.30365	16.1694	0	1.18033	0	0	0.492118	0	1.24678	2.13923	3.93068	0.34778	-1.8712	14.6624	0.000128583	0.00461767
	ENSMUSG00000082529.1	Gm11199	4.08979	3.7843	8.34521	15.3456	9.67368	2.09969	2.5766	1.45301	0	1.48661	4.88545	8.24772	1.52318	-1.87385	13.0727	0.000299632	0.00902365
	ENSMUSG00000094561.1	Ighv1-22	0	0.83711	20.3683	0	0	2.13467	0	0	0	0	2.33401	4.24108	0.426934	-1.87695	10.7791	0.00102651	0.0228646
	ENSMUSG00000115330.1	AC165953.1	18.6565	5.57668	4.93097	26.8917	36.3312	2.0335	0.745933	10.9507	0	7.75897	11.3876	18.4774	4.29782	-1.87833	11.0998	0.000863355	0.0201546
	ENSMUSG00000020829.9	Slc46a1	1.75111	2.60785	4.57062	18.506	14.7381	1.18056	1.18859	3.41085	0	2.02803	4.99817	8.43474	1.56161	-1.88093	13.1386	0.000289273	0.0088462
	ENSMUSG00000031737.11	Irx5	1.7759	2.41347	3.3526	21.3521	26.5421	0.827417	1.17589	8.1679	0	0.854692	6.64621	11.0872	2.20518	-1.91501	13.0408	0.000304778	0.0091359
	ENSMUSG00000078889.11	Gm14288	0	0	0	13.8681	0	0	0	0	0	0	1.38681	2.77362	0	-1.91595	10.3566	0.00129009	0.0270951
	ENSMUSG00000093955.2	Ighv1-34	0	1.58755	26.8148	0	0	0	0	2.16255	0	1.64558	3.22105	5.68047	0.761626	-1.92304	12.7033	0.000365021	0.0103546
	ENSMUSG00000078234.6	Klhdc7a	4.08887	3.84848	5.00329	35.2867	23.4525	0.905894	1.46413	6.52835	2.91815	3.34429	8.68407	14.336	3.03216	-1.92729	12.783	0.000349792	0.0100634
	ENSMUSG00000005958.14	Ephb3	4.56931	5.0271	7.98262	27.0747	43.4905	3.37763	1.61967	10.2251	0.707546	3.5415	10.7616	17.6288	3.89429	-1.92837	13.6043	0.00022567	0.00729997
	ENSMUSG00000076549.2	Igkv4-68	0	1.81958	32.1852	0	0	0	0	2.59407	0	2.62652	3.92254	6.80096	1.04412	-1.93217	12.4921	0.00040867	0.0113027
	ENSMUSG00000094546.1	Ighv1-26	0	4.59259	27.6429	0	1.69457	2.84622	0	0	0	2.34904	3.91253	6.78601	1.03905	-1.93299	10.6457	0.00110328	0.0241773
	ENSMUSG00000115308.1	AC135114.1	12.2756	0	0	0	1.85025	0	0	0	0	0	1.41258	2.82517	0	-1.93552	11.8442	0.000578425	0.0147149
	ENSMUSG00000095737.5	Igkv11-125	0	0	38.2004	0	0	0	0.770989	3.628	0	1.82679	4.44262	7.64008	1.24516	-1.94423	11.2273	0.00080603	0.0190311
	ENSMUSG00000069917.7	Hba-a2	14695.1	571.372	1418.81	21751.2	1554.36	2638.03	401.101	3668.82	3097.38	544.276	5034.04	7998.17	2069.92	-1.94958	11.2474	0.000797344	0.0189574
	ENSMUSG00000094845.1	Tmem95	3.23523	3.77887	4.32602	7.5881	19.3906	0.825258	0.294784	1.59335	0	3.4008	4.4433	7.66376	1.22284	-1.96259	14.9194	0.000112204	0.00413916
	ENSMUSG00000076534.6	Igkv12-89	0	2.88832	15.679	0	0	0	0	0	0	1.04101	1.96083	3.71346	0.208202	-1.96393	13.118	0.000292465	0.0089209
	ENSMUSG00000044927.6	H1fx	0.142318	1.28866	6.91315	6.58141	21.0991	1.95865	0.688613	2.06947	0	0.793098	4.15345	7.20493	1.10197	-1.96475	15.6421	7.6533e-05	0.00306477
	ENSMUSG00000018166.8	Erbb3	23.1608	8.39653	17.746	108.057	55.8014	2.56321	5.53628	23.3801	10.0614	9.08502	26.3788	42.6323	10.1252	-1.97157	11.4558	0.000712729	0.0175282
	ENSMUSG00000081951.1	Gm15352	9.52983	0	1.91381	1.50552	1.84264	0	0	0	0	0	1.47918	2.95836	0	-1.9849	11.74	0.000611724	0.0154122
	ENSMUSG00000096422.2	Igkv12-44	4.21044	23.7627	75.3206	0	7.12531	2.98735	2.71355	3.96256	0	14.4298	13.4512	22.0838	4.81865	-1.98812	11.4223	0.000725668	0.0177447
	ENSMUSG00000044674.6	Fzd1	13.3538	6.25631	9.61792	20.3381	65.8213	3.01782	2.76595	10.208	2.86977	6.14935	14.0398	23.0775	5.00218	-2.00413	12.122	0.000498317	0.012987
	ENSMUSG00000113606.1	Gm47441	15.2577	0	0	0	0	0	0	0	0	0	1.52577	3.05154	0	-2.01847	9.51704	0.00203572	0.0384295
	ENSMUSG00000089932.1	Gm16114	0	4.04635	6.9831	0	13.5559	1.14665	0	1.14926	0	0	2.68813	4.91707	0.459182	-2.01972	9.37294	0.00220212	0.0403274
	ENSMUSG00000025479.9	Cyp2e1	17.0493	3.70582	116.239	0.513819	5.32665	6.31427	6.59063	10.7687	4.08852	3.67772	17.4274	28.5669	6.28797	-2.0204	13.6754	0.000217281	0.00707683
	ENSMUSG00000081952.1	Gm12178	15.3492	0	0	0	0	0	0	0	0	0	1.53492	3.06984	0	-2.02497	19.4741	1.01974e-05	0.000605735
	ENSMUSG00000015970.19	Chdh	46.3694	10.975	15.9055	60.2459	98.801	2.93338	8.24514	17.8317	5.6532	18.1318	28.5092	46.4594	10.559	-2.03767	9.25361	0.00235032	0.0427691
	ENSMUSG00000096844.1	Igkv6-14	0	3.46404	142.38	0	0	3.67838	4.05596	1.48899	0	22.4857	17.7553	29.1688	6.34181	-2.03885	11.3708	0.000746074	0.0181062
	ENSMUSG00000095571.2	Ighv5-17	0.911797	26.9235	14.1242	0	0	1.45773	0.529236	0.965462	0.416528	3.0586	4.83871	8.3919	1.28551	-2.0389	13.1797	0.000282992	0.0086877
	ENSMUSG00000096632.2	Igkv9-124	0	3.23369	105.305	10.1539	12.5045	5.59973	1.54198	1.41507	0	19.558	15.9312	26.2394	5.62296	-2.04015	11.327	0.000763899	0.0183144
	ENSMUSG00000075312.4	Gm13597	0	0	0	24.6027	0	0.234946	0.000873	0	0	1.78102	2.66195	4.92054	0.403368	-2.07684	18.2922	1.89481e-05	0.000996046
	ENSMUSG00000028434.12	Epb41l4b	86.6557	31.4299	43.4997	177.752	131.904	6.4297	11.9109	54.9733	20.1274	13.6515	57.8334	94.2483	21.4186	-2.087	11.092	0.000867	0.0202214
	ENSMUSG00000105009.1	Gm42774	0	1.59894	11.685	0	3.22515	0	0	0	0	0	1.65091	3.30182	0	-2.10495	11.5196	0.000688651	0.0170337
	ENSMUSG00000095285.2	Ighv5-9	0	0.710979	12.6081	0	3.22527	0	0	0	0	0	1.65443	3.30887	0	-2.10731	25.6031	4.19375e-07	4.21613e-05
	ENSMUSG00000028909.17	Ptpru	9.76167	4.20981	9.96244	15.5295	36.0509	1.81701	1.1697	6.35865	2.65382	1.57698	8.90905	15.1029	2.71523	-2.11579	9.47667	0.00208101	0.0388631
	ENSMUSG00000063704.13	Mapk15	0.92466	0.115835	1.01993	5.34289	17.1585	0.742904	0.054152	0.04813	0	0.749474	2.61565	4.91236	0.318932	-2.16436	24.7769	6.43626e-07	5.91883e-05
	ENSMUSG00000095007.1	Igkv12-41	0	6.92808	80.3378	0	7.00558	2.9427	1.62238	2.97798	0	9.36905	11.1184	18.8543	3.38242	-2.17965	12.7413	0.000357669	0.0102453
	ENSMUSG00000109711.1	Gm45445	0	0	0	17.7329	0	0	0	0	0	0	1.77329	3.54658	0	-2.18478	9.47517	0.00208271	0.0388631
	ENSMUSG00000115948.1	AC113593.1	0	0	0	17.9932	0	0	0	0	0	0	1.79932	3.59864	0	-2.20121	11.3476	0.000755456	0.0181642
	ENSMUSG00000106188.1	Gm9710	7.60371	3.54967	6.35974	0.304125	9.60397	0	0.664657	0.600065	0	0.767026	2.9453	5.48424	0.40635	-2.20498	23.3229	1.36957e-06	0.000109519
	ENSMUSG00000063765.12	Chadl	3.46692	4.84844	5.44129	16.2346	67.6151	2.38978	2.96099	5.28942	3.34166	2.83115	11.4419	19.5213	3.3626	-2.23386	12.8122	0.000344375	0.00994094
	ENSMUSG00000008540.11	Mgst1	261.726	81.777	150.745	365.528	368.319	23.0622	34.906	107.594	38.9195	51.6154	148.419	245.619	51.2194	-2.23963	12.9249	0.000324232	0.00953044
	ENSMUSG00000081201.1	Smt3h2-ps4	0	0	0	0	19.1927	0	0	0	0	0	1.91927	3.83854	0	-2.27457	13.5044	0.000238009	0.00753592
	ENSMUSG00000096715.2	Igkv3-4	0	10.5979	130.797	0	3.15421	15.2255	0	0	0	10.0991	16.9874	28.9098	5.06492	-2.30206	13.0193	0.000308298	0.00917797
	ENSMUSG00000095351.2	Igkv3-2	0	1.62915	92.599	1.68723	10.3578	4.371	5.0766	0.580967	0	7.33682	12.3639	21.2546	3.47308	-2.31477	14.4582	0.000143304	0.0050547
	ENSMUSG00000084372.1	Gm13988	4.65704	3.04164	5.74098	13.7011	7.65809	1.33788	1.42496	0	0	0	3.75617	6.95977	0.552568	-2.35807	13.4435	0.000245855	0.00775798
	ENSMUSG00000111946.1	Gm47495	13.3325	0	10.7731	0	7.0228	2.02393	0	0	0	0	3.31523	6.22568	0.404786	-2.36278	12.1251	0.000497473	0.012987
	ENSMUSG00000033006.10	Sox10	19.1395	10.9261	21.369	89.225	126.234	1.38621	4.38726	25.5852	12.1708	4.01132	31.4434	53.3787	9.50816	-2.37153	14.4845	0.000141319	0.00500524
	ENSMUSG00000083430.1	Gm13006	0	0	0	20.9378	0	0	0	0	0	0	2.09378	4.18756	0	-2.37506	9.47517	0.00208271	0.0388631
	ENSMUSG00000024990.12	Rbp4	21.5117	2.09219	19.589	4.7113	96.745	2.65955	4.03583	14.8728	0	1.97262	16.819	28.9298	4.70816	-2.39049	16.4502	4.99445e-05	0.00217969
	ENSMUSG00000076563.2	Igkv5-48	0	20.9939	141.229	5.12716	3.94277	5.95779	1.45615	2.00353	0	18.515	19.9225	34.2586	5.58649	-2.42039	15.5869	7.87995e-05	0.00315063
	ENSMUSG00000080744.1	Gm12710	15.6481	11.8314	6.4405	0	3.13938	0	2.79824	0	0	0	3.98576	7.41188	0.559648	-2.43121	9.94635	0.00161169	0.0324467
	ENSMUSG00000076514.3	Igkv17-121	0	13.7293	163.245	0	7.15258	8.00636	0.733937	8.75295	0	11.0285	21.2649	36.8254	5.70435	-2.49619	15.8763	6.76211e-05	0.00274201
	ENSMUSG00000112595.1	Gm47340	26.1354	1.45802	0.507984	2.87408	0.501058	0.419915	0.455147	0	0	0.525857	3.28775	6.29531	0.280184	-2.51062	30.4312	3.45925e-08	5.49829e-06
	ENSMUSG00000114277.1	Gm48583	0	0	0	1.5014	22.923	0	0	0	0	0	2.44244	4.88488	0	-2.55701	9.66491	0.00187821	0.0361991
	ENSMUSG00000040564.14	Apoc1	1.93953	5.80072	4.54798	31.6677	3.98766	0	0	0.822806	0	3.1381	5.19045	9.58872	0.792181	-2.56274	21.474	3.58657e-06	0.000247589
	ENSMUSG00000108312.1	Gm44521	0	4.88264	3.19143	17.0403	0	0	0	0	0	0	2.51144	5.02287	0	-2.59045	10.8047	0.00101245	0.0226692
	ENSMUSG00000107176.1	Gm9794	0	23.9667	13.7919	9.02133	41.1738	5.08329	2.8708	0	0	2.42258	9.83304	17.5907	2.07533	-2.59577	18.5082	1.69178e-05	0.000917089
	ENSMUSG00000096887.2	Gm20594	470.035	17.2707	64.9712	172.501	41.2135	19.9507	29.4442	33.4745	10.4997	27.2999	88.666	153.198	24.1338	-2.61709	21.4134	3.70169e-06	0.000253497
	ENSMUSG00000115115.1	AL607142.1	16.4339	9.13916	0	2.73589	0	0	0.304213	0	0	0	2.86132	5.66179	0.0608426	-2.6507	10.8774	0.000973453	0.0220259
	ENSMUSG00000110642.1	Gm45710	0	25.0298	19.7486	17.1898	17.5894	0	0.108429	8.10221	0	0	8.77682	15.9115	1.64213	-2.67823	11.2433	0.000799098	0.0189815
	ENSMUSG00000095127.2	Ighv1-82	0	11.5954	122.412	0	9.7319	2.74151	0	1.21759	0	13.9885	16.1687	28.7479	3.58952	-2.69637	14.9895	0.000108109	0.00402852
	ENSMUSG00000027513.11	Pck1	15.3093	0.935752	137.797	1.76129	11.3724	4.42725	1.43567	8.90953	4.95455	1.50616	18.8409	33.4351	4.24663	-2.71442	19.4598	1.02741e-05	0.000608157
	ENSMUSG00000031762.7	Mt2	13.419	21.1041	77.9248	199.342	181.118	12.2533	6.34365	28.2243	0	23.0552	56.2784	98.5816	13.9753	-2.73329	20.7144	5.33124e-06	0.000347529
	ENSMUSG00000076731.3	Ighv8-12	0	4.65091	40.9178	6.63902	1.602	0	0.24663	0	0	3.42069	5.7477	10.7619	0.733464	-2.7624	20.5541	5.79689e-06	0.00037223
	ENSMUSG00000111506.1	Gm48848	13.282	4.034	0	74.6147	9.64896	0	8.13471	2.52218	0	0	11.2237	20.3159	2.13138	-2.76706	16.5938	4.63013e-05	0.002052
	ENSMUSG00000067085.1	Gm10197	29.0608	0	0	0	0	0	0	0	0	0	2.90608	5.81216	0	-2.76811	12.8317	0.000340796	0.00989193
	ENSMUSG00000087642.3	Ighe	0	13.9372	34.613	0	0	0.778019	0.223601	0.428488	0	1.20169	5.1182	9.71004	0.52636	-2.8108	35.5616	2.47116e-09	5.89165e-07
	ENSMUSG00000108284.1	Gm44182	0	0	0	27.628	2.52418	0	0	0	0	0	3.01522	6.03044	0	-2.81361	15.472	8.37343e-05	0.0032867
	ENSMUSG00000081921.1	Gm12858	0	0	0	4.67122	25.9558	0	0	0	0	0	3.0627	6.1254	0	-2.83297	10.6952	0.00107415	0.02368
	ENSMUSG00000076526.6	Igkv12-98	0	6.06207	94.6201	0	0.898011	2.20703	0	3.05633	0	3.74762	11.0591	20.316	1.8022	-2.92731	22.0487	2.65823e-06	0.000191192
	ENSMUSG00000098121.1	Gm27038	12.7532	0	18.4573	10.2368	17.8926	0	0	0	0	3.30543	6.26453	11.868	0.661086	-2.95359	10.7647	0.00103452	0.0230233
	ENSMUSG00000104452.1	Ighv8-8	0	5.53161	50.1155	0	0.801002	1.34497	1.47978	0	0	0	5.92729	11.2896	0.56495	-2.97325	24.3332	8.10287e-07	7.24447e-05
	ENSMUSG00000081344.5	Gm14303	0	0	0	38.2998	0	0	0	0	0	0	3.82998	7.65996	0	-3.11436	11.8351	0.000581242	0.0147438
	ENSMUSG00000083300.1	Gm12309	0	0	0	0	50.0751	0	0	0	0	0	5.00751	10.015	0	-3.4614	12.2142	0.000474283	0.0125126
	ENSMUSG00000078686.11	Mup9	15.0364	0	63.6946	1.15419	10.0225	0	0	0	0	0.312038	9.02197	17.9815	0.0624076	-4.15919	41.9495	9.36633e-11	4.38498e-08
	ENSMUSG00000069622.4	Gm10273	41.3867	0	18.6656	2e-06	48.8509	0.486063	0.064055	1e-06	0	0	10.9453	21.7806	0.110024	-4.35915	82.1442	1.2651e-19	2.96136e-16
	ENSMUSG00000080859.1	Rpl10-ps1	0	185.407	0	0	0	0.064009	0	0	0	0	18.5471	37.0814	0.0128018	-5.23266	93.8578	3.39032e-22	1.74594e-18
