# Supplementary material for: Cabergoline as a Novel Strategy for Post-Pregnancy Breast Cancer Prevention in Mice and Human
Source: Research Square preprint supplement (doi:10.21203/rs.3.rs-3854490/v1), 2024-02-05
Supplement: Supplementary file 7 [file 7640d78437f3e8a5a63bcdbf.xlsx]

## Sheet: Supplementary Table S15
	GO_BP_DOWN DEGs
	ID	Description	Gene Ratio	Bg Ratio	P value	P Adj	q value	Gene ID	Count
	GO:0002377	immunoglobulin production	17/272	280/28943	1.59102e-09	4.19394e-06	3.78664e-06	Igkv20-101-2/Igkv4-74/Igkv4-80/Igkv4-72/Igkv4-68/Igkv11-125/Igkv12-89/Igkv12-44/Igkv6-14/Igkv9-124/Igkv3-4/Igkv3-2/Rbp4/Igkv5-48/Igkv17-121/Ighe/Igkv12-98	17
	GO:0002440	production of molecular mediator of immune response	17/272	422/28943	6.13357e-07	0.000808405	0.000729895	Igkv20-101-2/Igkv4-74/Igkv4-80/Igkv4-72/Igkv4-68/Igkv11-125/Igkv12-89/Igkv12-44/Igkv6-14/Igkv9-124/Igkv3-4/Igkv3-2/Rbp4/Igkv5-48/Igkv17-121/Ighe/Igkv12-98	17
	GO:0008037	cell recognition	14/272	302/28943	1.19868e-06	0.00105324	0.000950949	Cntn6/Smcp/Prss37/Ighv5-4/Ighv1-22/Ighv1-34/Ephb3/Ighv1-26/Ighv5-17/Ighv5-9/Ighv1-82/Ighv8-12/Ighe/Ighv8-8	14
	GO:0006958	complement activation, classical pathway	10/272	167/28943	4.41127e-06	0.00272469	0.00246008	Ighv5-4/Ighv1-22/Ighv1-34/Ighv1-26/Ighv5-17/Ighv5-9/Ighv1-82/Ighv8-12/Ighe/Ighv8-8	10
	GO:0006910	phagocytosis, recognition	10/272	170/28943	5.16823e-06	0.00272469	0.00246008	Ighv5-4/Ighv1-22/Ighv1-34/Ighv1-26/Ighv5-17/Ighv5-9/Ighv1-82/Ighv8-12/Ighe/Ighv8-8	10
	GO:0050853	B cell receptor signaling pathway	10/272	182/28943	9.43359e-06	0.00372707	0.00336511	Ighv5-4/Ighv1-22/Ighv1-34/Ighv1-26/Ighv5-17/Ighv5-9/Ighv1-82/Ighv8-12/Ighe/Ighv8-8	10
	GO:0002455	humoral immune response mediated by circulating immunoglobulin	10/272	183/28943	9.89739e-06	0.00372707	0.00336511	Ighv5-4/Ighv1-22/Ighv1-34/Ighv1-26/Ighv5-17/Ighv5-9/Ighv1-82/Ighv8-12/Ighe/Ighv8-8	10
	GO:0006956	complement activation	10/272	193/28943	1.57292e-05	0.00518276	0.00467943	Ighv5-4/Ighv1-22/Ighv1-34/Ighv1-26/Ighv5-17/Ighv5-9/Ighv1-82/Ighv8-12/Ighe/Ighv8-8	10
	GO:0006911	phagocytosis, engulfment	10/272	201/28943	2.23249e-05	0.00653871	0.00590369	Ighv5-4/Ighv1-22/Ighv1-34/Ighv1-26/Ighv5-17/Ighv5-9/Ighv1-82/Ighv8-12/Ighe/Ighv8-8	10
	GO:0099024	plasma membrane invagination	10/272	210/28943	3.24571e-05	0.00855569	0.00772479	Ighv5-4/Ighv1-22/Ighv1-34/Ighv1-26/Ighv5-17/Ighv5-9/Ighv1-82/Ighv8-12/Ighe/Ighv8-8	10
	GO:0060259	regulation of feeding behavior	5/272	41/28943	4.01488e-05	0.00899255	0.00811922	Htr1a/Crhr1/Npy2r/Trh/Mchr1	5
	GO:0002768	immune response-regulating cell surface receptor signaling pathway	13/272	360/28943	4.09372e-05	0.00899255	0.00811922	Clec12b/Fpr1/Ighv5-4/Clec4d/Ighv1-22/Ighv1-34/Ighv1-26/Ighv5-17/Ighv5-9/Ighv1-82/Ighv8-12/Ighe/Ighv8-8	13
	GO:0010324	membrane invagination	10/272	218/28943	4.45411e-05	0.00903156	0.00815444	Ighv5-4/Ighv1-22/Ighv1-34/Ighv1-26/Ighv5-17/Ighv5-9/Ighv1-82/Ighv8-12/Ighe/Ighv8-8	10
	GO:0050871	positive regulation of B cell activation	10/272	222/28943	5.19008e-05	0.00967673	0.00873696	Ighv5-4/Ighv1-22/Ighv1-34/Ighv1-26/Ighv5-17/Ighv5-9/Ighv1-82/Ighv8-12/Ighe/Ighv8-8	10
	GO:0050795	regulation of behavior	7/272	103/28943	5.50649e-05	0.00967673	0.00873696	Htr1a/Crhr1/Npy2r/Alb/Trh/Mchr1/Adrb1	7
	GO:0045109	intermediate filament organization	6/272	74/28943	7.07171e-05	0.0116506	0.0105192	Krt33b/Krt9/Krt71/Krt13/Krt87/Gfap	6
	GO:0006909	phagocytosis	13/272	390/28943	9.19374e-05	0.0142557	0.0128712	Ahsg/Lep/Ighv5-4/Adipoq/Ighv1-22/Ighv1-34/Ighv1-26/Ighv5-17/Ighv5-9/Ighv1-82/Ighv8-12/Ighe/Ighv8-8	13
	GO:0051048	negative regulation of secretion	9/272	206/28943	0.000154568	0.0226356	0.0204373	Htr1a/Crhr1/Npy2r/Trh/Drd4/Lep/Ucn2/Adipoq/Erbb3	9
	GO:0006959	humoral immune response	13/272	425/28943	0.000213908	0.0296769	0.0267948	Nppb/Wfdc15b/Camp/Ighv5-4/Ighv1-22/Ighv1-34/Ighv1-26/Ighv5-17/Ighv5-9/Ighv1-82/Ighv8-12/Ighe/Ighv8-8	13
	GO:0007631	feeding behavior	7/272	130/28943	0.000236872	0.0312197	0.0281877	Htr1a/Crhr1/Npy2r/Trh/Lep/Mchr1/Cntfr	7
	GO:0045104	intermediate filament cytoskeleton organization	6/272	93/28943	0.000250797	0.031481	0.0284236	Krt33b/Krt9/Krt71/Krt13/Krt87/Gfap	6
	GO:0045103	intermediate filament-based process	6/272	94/28943	0.000265813	0.0318492	0.0287561	Krt33b/Krt9/Krt71/Krt13/Krt87/Gfap	6
	GO:0042596	fear response	5/272	62/28943	0.00029525	0.0333639	0.0301237	Htr1a/Crhr1/Npy2r/Drd4/Adrb1	5
	GO:0006820	anion transport	14/272	500/28943	0.000303769	0.0333639	0.0301237	Slc22a6/Htr1a/Bsnd/Trh/Slc22a7/Slco4c1/Slc22a30/Drd4/Glra2/Lep/Clcnkb/Gfap/Slc46a1/Mgst1	14
	GO:0050864	regulation of B cell activation	10/272	278/28943	0.00032483	0.0342501	0.0309238	Ighv5-4/Ighv1-22/Ighv1-34/Ighv1-26/Ighv5-17/Ighv5-9/Ighv1-82/Ighv8-12/Ighe/Ighv8-8	10
	GO:0019373	epoxygenase P450 pathway	4/272	36/28943	0.000354683	0.0359594	0.0324671	Cyp2c65/Cyp2b23/Cyp2f2/Cyp2e1	4
	GO:0051953	negative regulation of amine transport	4/272	37/28943	0.000394756	0.037549	0.0339024	Htr1a/Crhr1/Trh/Lep	4
	GO:0016064	immunoglobulin mediated immune response	10/272	286/28943	0.000406035	0.037549	0.0339024	Ighv5-4/Ighv1-22/Ighv1-34/Ighv1-26/Ighv5-17/Ighv5-9/Ighv1-82/Ighv8-12/Ighe/Ighv8-8	10
	GO:2000252	negative regulation of feeding behavior	3/272	16/28943	0.000419868	0.037549	0.0339024	Crhr1/Npy2r/Trh	3
	GO:0019724	B cell mediated immunity	10/272	289/28943	0.000440547	0.037549	0.0339024	Ighv5-4/Ighv1-22/Ighv1-34/Ighv1-26/Ighv5-17/Ighv5-9/Ighv1-82/Ighv8-12/Ighe/Ighv8-8	10
	GO:0030534	adult behavior	8/272	189/28943	0.000441586	0.037549	0.0339024	Crhr1/Trh/Drd4/Slitrk6/Lep/Foxa2/Ppp1r1b/Chl1	8
	GO:0015850	organic hydroxy compound transport	10/272	294/28943	0.000503473	0.0390406	0.0352491	Htr1a/Crhr1/Npy2r/Lep/Pon1/Syt9/Adipoq/Mapk15/Rbp4/Apoc1	10
	GO:0002429	immune response-activating cell surface receptor signaling pathway	11/272	349/28943	0.000506205	0.0390406	0.0352491	Fpr1/Ighv5-4/Ighv1-22/Ighv1-34/Ighv1-26/Ighv5-17/Ighv5-9/Ighv1-82/Ighv8-12/Ighe/Ighv8-8	11
	GO:0006677	glycosylceramide metabolic process	3/272	17/28943	0.000506306	0.0390406	0.0352491	Lct/Ugt8a/Gal3st1	3
	GO:0002757	immune response-activating signal transduction	11/272	350/28943	0.000518368	0.0390406	0.0352491	Fpr1/Ighv5-4/Ighv1-22/Ighv1-34/Ighv1-26/Ighv5-17/Ighv5-9/Ighv1-82/Ighv8-12/Ighe/Ighv8-8	11
	GO:0015711	organic anion transport	11/272	356/28943	0.000596595	0.043684	0.0394416	Slc22a6/Htr1a/Trh/Slc22a7/Slco4c1/Slc22a30/Drd4/Lep/Gfap/Slc46a1/Mgst1	11
	GO:0050851	antigen receptor-mediated signaling pathway	10/272	307/28943	0.00070276	0.0463202	0.0418217	Ighv5-4/Ighv1-22/Ighv1-34/Ighv1-26/Ighv5-17/Ighv5-9/Ighv1-82/Ighv8-12/Ighe/Ighv8-8	10
	GO:0051956	negative regulation of amino acid transport	3/272	19/28943	0.000711527	0.0463202	0.0418217	Htr1a/Trh/Lep	3
	GO:0002449	lymphocyte mediated immunity	13/272	483/28943	0.000714765	0.0463202	0.0418217	Clec12b/Lep/H2-M11/Ighv5-4/Ighv1-22/Ighv1-34/Ighv1-26/Ighv5-17/Ighv5-9/Ighv1-82/Ighv8-12/Ighe/Ighv8-8	13
	GO:0048732	gland development	13/272	483/28943	0.000714765	0.0463202	0.0418217	Tbx19/Crhr1/Ugt1a8/Nkx3-1/Ugt1a9/Sox2/Klf1/Prl2c2/Msx2/Sostdc1/Ephb3/Sox10/Pck1	13
	GO:0046883	regulation of hormone secretion	10/272	308/28943	0.000720458	0.0463202	0.0418217	Htr1a/Crhr1/Trh/Nkx3-1/Lep/Foxa2/Syt9/Ucn2/Adipoq/Rbp4	10
	GO:0019932	second-messenger-mediated signaling	10/272	309/28943	0.000738521	0.046351	0.0418495	Crhr1/Npy2r/Drd4/Nppb/Tox3/Pdzd3/Ccr1/Tenm2/Erbb3/Mt2	10
	GO:0048148	behavioral response to cocaine	3/272	20/28943	0.000831296	0.049996	0.0451406	Crhr1/Drd4/Ppp1r1b	3
	GO:0019369	arachidonic acid metabolic process	5/272	78/28943	0.000852714	0.049996	0.0451406	Cyp4a12a/Cyp2c65/Cyp2b23/Cyp2f2/Cyp2e1	5
	GO:0051952	regulation of amine transport	6/272	117/28943	0.000853498	0.049996	0.0451406	Htr1a/Crhr1/Npy2r/Trh/Lep/Syt9	6
	GO_BP_UP DEGs
	ID	Description	Gene Ratio	Bg Ratio	P value	P Adj	q value	Gene ID	Count
	Nothing was found
	GO_CC_DOWN DEGs
	ID	Description	Gene Ratio	Bg Ratio	P value	P Adj	q value	Gene ID	Count
	GO:0019814	immunoglobulin complex	12/270	150/28804	1.97565e-08	4.5835e-06	4.18005e-06	Ighv5-4/Ighv1-22/Ighv1-34/Ighv1-26/Ighv5-17/Ighv5-9/Igkv12-41/Igkv5-48/Ighv1-82/Ighv8-12/Ighe/Ighv8-8	12
	GO:0042571	immunoglobulin complex, circulating	10/270	139/28804	8.17419e-07	9.48206e-05	8.64743e-05	Ighv5-4/Ighv1-22/Ighv1-34/Ighv1-26/Ighv5-17/Ighv5-9/Ighv1-82/Ighv8-12/Ighe/Ighv8-8	10
	GO:0045177	apical part of cell	14/270	488/28804	0.000231385	0.0178938	0.0163187	Cyp4a12a/Slc5a7/Crhr1/Mlc1/Lct/Amn/Pdzd3/Pard6b/Chl1/Cntfr/Slc46a1/Erbb3/Epb41l4b/Mgst1	14
	GO:0000800	lateral element	3/270	20/28804	0.000825113	0.0478565	0.0436441	Rad21l/1700013H16Rik/Sycp2l	3
	GO_CC_UP DEGs
	ID	Description	Gene Ratio	Bg Ratio	P value	P Adj	q value	Gene ID	Count
	Nothing was found
	GO_MF_DOWN DEGs
	ID	Description	Gene Ratio	Bg Ratio	P value	P Adj	q value	Gene ID	Count
	GO:0034987	immunoglobulin receptor binding	11/251	141/28404	5.51548e-08	2.39372e-05	2.09008e-05	Ighv5-4/Clec4d/Ighv1-22/Ighv1-34/Ighv1-26/Ighv5-17/Ighv5-9/Ighv1-82/Ighv8-12/Ighe/Ighv8-8	11
	GO:0003823	antigen binding	12/251	233/28404	1.2479e-06	0.000270794	0.000236444	Abo/H2-M11/Ighv5-4/Ighv1-22/Ighv1-34/Ighv1-26/Ighv5-17/Ighv5-9/Ighv1-82/Ighv8-12/Ighe/Ighv8-8	12
	GO:0008392	arachidonic acid epoxygenase activity	5/251	48/28404	6.50166e-05	0.00940574	0.00821263	Cyp4a12a/Cyp2c65/Cyp2b23/Cyp2f2/Cyp2e1	5
	GO:0008391	arachidonic acid monooxygenase activity	5/251	51/28404	8.72922e-05	0.00947121	0.00826979	Cyp4a12a/Cyp2c65/Cyp2b23/Cyp2f2/Cyp2e1	5
	GO:0005179	hormone activity	7/251	132/28404	0.000178578	0.0155005	0.0135343	Trh/Nppb/Lep/Prl2c2/Ucn2/Retnlg/Adipoq	7
	GO:0004497	monooxygenase activity	7/251	152/28404	0.000422125	0.0305337	0.0266606	Cyp4a12a/Cyp2c65/Cyp2b23/Fmo3/Pcbd1/Cyp2f2/Cyp2e1	7
	GO:0016712	oxidoreductase activity, acting on paired donors, with incorporation or reduction of molecular oxygen, reduced flavin or flavoprotein as one donor, and incorporation of one atom of oxygen	5/251	76/28404	0.000573934	0.0355839	0.0310701	Cyp4a12a/Cyp2c65/Cyp2b23/Cyp2f2/Cyp2e1	5
	GO_MF_UP DEGs
	ID	Description	Gene Ratio	Bg Ratio	P value	P Adj	q value	Gene ID	Count
	GO:0042923	neuropeptide binding	3/73	47/28404	0.000243475	0.0467473	0.0407501	Sstr2/Mrgpra1/Mrgpra2a	3
	Reactome_DOWN DEGs
	ID	Description	Gene Ratio	Bg Ratio	P value	P Adj	q value	Gene ID	Count
	R-MMU-9749641	Aspirin ADME	5/93	34/8501	3.04511e-05	0.00855676	0.00833399	Cyp2c65/Alb/Slc22a7/Ugt1a9/Cyp2e1	5
	R-MMU-9748784	Drug ADME	6/93	97/8501	0.000647476	0.0909704	0.088602	Cyp2c65/Alb/Slc22a7/Ugt1a9/Pon1/Cyp2e1	6
	Reactome_UP DEGs
	ID	Description	Gene Ratio	Bg Ratio	P value	P Adj	q value	Gene ID	Count
	Nothing was found
	Wiki Patways_DOWN DEGs
	ID	Description	Gene Ratio	Bg Ratio	P value	P Adj	q value	Gene ID	Count
	WP447	Adipogenesis genes	7/57	135/4526	0.00136851	0.0971639	0.0864319	Wtap (16846), Klf5 (12224), Fzd1 (12804), Suclg2 (11450), Pck1 (14362), Muc19 (18534)	7
	Wiki Patways_UP DEGs
	ID	Description	Gene Ratio	Bg Ratio	P value	P Adj	q value	Gene ID	Count
	Nothing was found
