# Supplementary material for: Cabergoline as a Novel Strategy for Post-Pregnancy Breast Cancer Prevention in Mice and Human
Source: Research Square preprint supplement (doi:10.21203/rs.3.rs-3854490/v1), 2024-02-05
Supplement: Supplementary file 8 [file 7afbc3b03da052606318c85b.xlsx]

## Sheet: Supplementary Table S16
	Cluster 1: Proliferation	Cluster 2: Development
	Kinase family	Hormone receptors
	Lats2	Crhr1
	Mapk15
		Kinases
	Transcription regulators/factors	Ephb3
	Smarcad1
	Sox10	Transcription factors
	Klf5	Klf1
	Msx2	Msx2
	Tox3	Nkx3-1
	Klf1	Sox10
	Dlx5	Sox2
	Lhx1	Tbx19
	Foxa2
	Prl2c2	Enzymes
		Pck1
	Cytokines and receptors	Ugt1a8
	Il27	Ugt1a9
	Sstr2
	Erbb3	Signaling molecules
	Ephb3	Prl2c2
		Sostdc1
	Apoptosis and cell survival
	Bcl2l10	Others
		Msx2
	Cadherins and related proteins	Sostdc1
	Cdh22
	Wnt signaling pathway
	Frzd1
	Dkk3
	Rspo4
	Growth factors
	Fgf17
	Lep
	Bmp15
	Extracellular matrix
	Lamc3
	Enzymes and related proteins
	Adamts16
	Dyrk3
	Hrasls5
	Akr1b7
	Others
	Fgfbp1
	Stk32b
	Tssk3
	Sostdc1
	Adipoq
	Klf5
