# Supplementary material for: Cabergoline as a Novel Strategy for Post-Pregnancy Breast Cancer Prevention in Mice and Human
Source: Research Square preprint supplement (doi:10.21203/rs.3.rs-3854490/v1), 2024-02-05
Supplement: Supplementary file 9 [file 832e739690ebd952508b26cb.xlsx]

## Sheet: Supplementary Table S3
	ENS	Symbol	Z1_Cab	Z2_Cab	Z4_Cab	Z5_Cab	X1_Mult	X2_Mult	X3_Mult	X4_Mult	X5_Mult	Exp_Mean	Mean_Mult	Mean_Cab	log2FC	Stat	P value	Sd_Cab	DER_Cab	Sd_Mult	DER_Mult
	ENSMUSG00000094345.2	Igkv14-126	0.770705	0.847464	0.554632	125.874	0.172859	1.95311	3.48342	0	0	14.8507	1.12188	32.0117	3.95956	42.9819	5.52475e-11	62.575	1.95475	1.55609	1.38704
	ENSMUSG00000076613.4	Ighg2b	0.909116	10.7154	7.98818	148.907	0.482976	4.9517	6.30517	0.296609	0.741015	20.1441	2.55549	42.1299	3.60057	28.7464	8.25049e-08	71.3046	1.69249	2.85009	1.11528
	ENSMUSG00000093861.2	Igkv1-110	48.5139	35.8038	53.1301	478.959	46.8218	16.1209	15.0659	10.0029	19.7126	80.459	21.5448	154.102	2.78235	9.66308	0.00188008	216.695	1.40618	14.5507	0.67537
	ENSMUSG00000076612.8	Ighg2c	0.186625	9.70214	7.05332	74.7262	0.207707	4.4543	7.6357	0.068692	0.395611	11.6034	2.5524	22.9171	2.75117	24.8696	6.13417e-07	34.7714	1.51727	3.38287	1.32537
	ENSMUSG00000078503.9	Zfp990	3.70986	0	22.0221	25.949	4.26287	0.107387	0.682379	2.13884	0	6.54138	1.4383	12.9202	2.51324	5.16418	0.0230574	12.9661	1.00355	1.79446	1.24763
	ENSMUSG00000076614.7	Ighg1	1.6105	144.377	41.9341	155.809	0.81776	19.9758	54.5006	1.03591	0.90223	46.7737	15.4465	85.9326	2.40212	15.9719	6.42888e-05	76.0363	0.884836	23.3395	1.511
	ENSMUSG00000039364.13	Sectm1b	16.6493	5.91533	27.5979	20.1305	3.68706	3.47125	0	5.51459	3.00284	9.55209	3.13515	17.5733	2.16722	6.28267	0.0121925	9.01469	0.512978	1.99537	0.636451
	ENSMUSG00000076563.2	Igkv5-48	13.836	28.07	18.8254	57.3307	7.14657	3.2041	7.28946	8.07988	7.23507	16.7797	6.59102	29.5155	2.00718	4.77567	0.0288646	19.4585	0.659263	1.92997	0.292819
	ENSMUSG00000095285.2	Ighv5-9	0	1.54371	1.81642	10.3495	0.314643	0.21391	0	0	0	1.58202	0.105711	3.42741	2.00149	21.9357	2.81946e-06	4.68352	1.36649	0.149067	1.41014
	ENSMUSG00000035896.5	Rnase1	4.23135	6.07673	29.7173	9.26834	8.34791	0.139366	0.19554	2.95921	0.172242	6.78978	2.36285	12.3234	1.98621	4.19331	0.0405839	11.7811	0.955992	3.55726	1.50549
	ENSMUSG00000025165.12	Sectm1a	24.1414	13.0267	37.0113	18.0976	8.30304	7.54767	0.602411	5.69	5.0658	13.2762	5.44178	23.0693	1.90166	5.07732	0.0242408	10.3457	0.448463	3.01015	0.553155
	ENSMUSG00000090790.1	Gm17377	3.9193	11.1489	2.91553	4.69965	0.045096	0	1.72225	2.32947	0	2.97558	0.819363	5.67084	1.87444	5.90568	0.0150922	3.72433	0.656751	1.12226	1.36967
	ENSMUSG00000095863.2	Ighv1-67	11.0316	6.28779	4.70514	12.2612	1.46328	3.09733	2.29991	0	1.22934	4.7084	1.61797	8.57143	1.87029	10.5468	0.00116388	3.64372	0.4251	1.16687	0.721193
	ENSMUSG00000094502.5	Ighv1-69	2.12577	0.736819	5.48818	11.5424	0.081316	0.857081	1.31889	0.251507	0.826267	2.58091	0.667012	4.97329	1.84126	11.4022	0.000733586	4.81229	0.967626	0.500529	0.750405
	ENSMUSG00000066443.5	Gm10163	8.52202	23.0469	35.8773	2.45511	5.01515	0.05488	6.26129	3.21561	7.06875	10.1686	4.32314	17.4753	1.79525	4.11179	0.0425853	15.0049	0.858635	2.79367	0.646214
	ENSMUSG00000094689.1	Ighv1-81	0.735185	0.344082	0.908427	7.84529	0	0	0	0	0	1.09255	0	2.45825	1.79004	24.2768	8.34384e-07	3.59911	1.4641	0	#NUM!
	ENSMUSG00000102364.1	Ighv8-5	0.406761	1.76051	0.554632	20.5254	1.07086	0.325518	2.61257	0.390995	0.648664	3.14399	1.00972	5.81183	1.76105	8.01262	0.00464526	9.82777	1.691	0.942627	0.933551
	ENSMUSG00000047730.17	Fcgbp	20.9904	19.9236	5.4728	6.07607	1.71148	3.86903	3.50585	2.06538	5.17166	7.64292	3.26468	13.1157	1.72679	7.33535	0.00676115	8.49174	0.647447	1.4063	0.430762
	ENSMUSG00000028972.11	Car6	13.8333	6.32599	18.0791	4.43371	6.12881	1.82046	0	2.39853	2.46406	6.16488	2.56237	10.668	1.71165	4.4147	0.0356305	6.39435	0.599394	2.22891	0.869862
	ENSMUSG00000094198.2	Ighv1-50	4.54798	0.688941	18.3138	0.779041	1.8192	2.05519	0.702613	0.811671	0.550619	3.36323	1.18786	6.08244	1.69473	6.95305	0.00836763	8.35018	1.37283	0.695326	0.585361
	ENSMUSG00000076535.1	Igkv1-88	0	4.9227	2.68459	17.4377	1.84283	0.946343	2.53405	0.378664	1.31187	3.56208	1.40275	6.26125	1.59553	4.68684	0.0303946	7.71796	1.23265	0.82747	0.589891
	ENSMUSG00000048905.5	4930539E08Rik	6.64031	6.4938	11.5318	6.2441	1.54133	2.02782	2.92468	1.55574	1.55225	4.50131	1.92036	7.7275	1.57942	4.9698	0.0257936	2.54147	0.328886	0.598398	0.311607
	ENSMUSG00000108316.1	Gm44589	0.602606	5.05959	2.80634	2.20121	0	1.17527	0	0	0	1.31611	0.235054	2.66744	1.5702	7.18647	0.00734553	1.84595	0.692031	0.525597	2.23607
	ENSMUSG00000076688.2	Ighv15-2	0.204289	2.33566	2.61507	17.0563	0	3.75711	2.71776	0	0	3.18735	1.29497	5.55283	1.51364	8.87628	0.002889	7.74419	1.39464	1.81089	1.3984
	ENSMUSG00000076615.4	Ighg3	0.024153	5.66365	4.97026	61.4287	0.033087	10.6604	17.6357	0.071141	0.025592	11.1681	5.68518	18.0217	1.50861	5.87662	0.0153432	29.0467	1.61177	8.1096	1.42644
	ENSMUSG00000106161.1	Pvrig-ps	0	5.14066	2.17789	4.91097	0.727038	0	1.55496	0	0	1.61239	0.4564	3.05738	1.47814	4.3109	0.037869	2.44247	0.798876	0.690105	1.51206
	ENSMUSG00000056412.6	Gm12396	5.73641	0	6.28025	5e-05	0.607601	1.78937	0	0	0	1.60152	0.479394	3.00418	1.4365	8.65606	0.00325976	3.47599	1.15705	0.778128	1.62315
	ENSMUSG00000099797.1	Gm3145	1.89629	5.38318	3.80103	4.26147	0	0.945568	2.6509	0.578408	0	2.16854	0.834975	3.83549	1.3979	4.61414	0.0317095	1.45356	0.378975	1.09202	1.30784
	ENSMUSG00000109522.1	Olfr1319-ps1	2.87278	0.592252	3.62619	2.64568	0	0	0	1.56008	0	1.25522	0.312016	2.43423	1.3882	4.71181	0.0299561	1.29752	0.533033	0.697689	2.23607
	ENSMUSG00000115893.1	AC242685.5	9.06959	18.006	19.2178	11.4546	0	9.57273	15.7235	0	0	9.22714	5.05925	14.437	1.34918	7.07485	0.00781734	4.94293	0.342379	7.26095	1.43518
	ENSMUSG00000096577.2	Ighv1-71	1.22581	22.415	3.84467	4.23527	0.685997	4.19836	7.34551	0.436377	0.575755	4.99586	2.6484	7.93019	1.29143	5.40252	0.0201076	9.74854	1.2293	3.06207	1.1562
	ENSMUSG00000081110.1	Gm12745	0	0	3.98542	4.4829	0	0	1.40352	0	0	1.09687	0.280704	2.11708	1.28326	4.49375	0.034019	2.45302	1.15868	0.627673	2.23607
	ENSMUSG00000083603.1	Gm14810	1.67247	1.93195	4.76045	1.16701	0.996107	0	0	0.707136	0.545914	1.309	0.449831	2.38297	1.22241	4.10416	0.0427779	1.6165	0.678354	0.441178	0.980762
	ENSMUSG00000076583.1	Igkv8-24	13.1053	2.66999	10.2224	3.75459	0.654868	4.00684	4.54154	0.73948	3.66086	4.81732	2.72072	7.43807	1.18133	4.38695	0.0362151	5.03894	0.677452	1.87393	0.688762
	ENSMUSG00000110458.1	Gm21769	0	2.67494	2.39098	0	0	0	0	0	0	0.56288	0	1.26648	1.18045	6.48013	0.0109087	1.46699	1.15832	0	#NUM!
	ENSMUSG00000092512.1	Gm4152	0	2.68107	0.692672	1.52469	0	0	0	0	0	0.54427	0	1.22461	1.15355	7.75262	0.00536347	1.15383	0.942201	0	#NUM!
	ENSMUSG00000102313.1	Ighv1-62-1	3.61302	0	0.944242	0.331957	0	0	0	0	0	0.543247	0	1.2223	1.15206	18.1714	2.0189e-05	1.6411	1.34262	0	#NUM!
	ENSMUSG00000061615.2	Hist1h2ab	0.904235	11.4733	11.5506	19.4303	0.731537	6.95649	13.3148	0.237185	0.675252	7.25263	4.38305	10.8396	1.13712	4.9858	0.0255562	7.60304	0.701413	5.71551	1.304
	ENSMUSG00000110812.1	Gm48407	1.31641	0.961984	1.03223	1.2271	0	0	0	0	0	0.504192	0	1.13443	1.09385	6.10247	0.0134993	0.165214	0.145636	0	#NUM!
	ENSMUSG00000096355.2	Ighv8-4	0.204289	0.498513	0.500198	4.36006	0.310361	0.344147	0	0	0	0.690841	0.130902	1.39077	1.08	4.3685	0.0366092	1.98441	1.42685	0.179642	1.37234
	ENSMUSG00000083430.1	Gm13006	0	0	0.996355	3.36218	0	0	0	0	0	0.484282	0	1.08963	1.06325	4.81295	0.0282466	1.58617	1.45569	0	#NUM!
	ENSMUSG00000079225.3	Gm9531	2.4685	7.67126	7.16485	7.65609	0.462186	0.102402	9.59065	1.39858	0.81396	4.14761	2.47356	6.24017	1.05961	4.86283	0.0274412	2.52543	0.404705	4.00721	1.62002
	ENSMUSG00000076540.3	Igkv4-80	3.08048	1.22852	4.04273	0.992357	0.192853	0.352533	0.995376	0.212338	1.26538	1.37362	0.603696	2.33602	1.05673	4.18264	0.04084	1.47185	0.630069	0.494033	0.818347
	ENSMUSG00000071497.3	Nutf2-ps1	7.89388	11.1583	6.2336	10.9359	1.81337	3.27097	12.1161	2.61609	0.008336	6.22739	3.96497	9.05542	1.01812	4.04281	0.04436	2.39932	0.264959	4.71769	1.18984
	ENSMUSG00000078377.5	Gm4294	0	0	1.3041	2.76138	0	0	0	0	0	0.45172	0	1.01637	1.01176	29.2043	6.51331e-08	1.31578	1.29459	0	#NUM!
	ENSMUSG00000115183.1	AC154738.4	0.642081	3.0146	2.23296	2.07949	0.236139	0.438407	0.891204	0.781418	0.1309	1.1608	0.495614	1.99228	1.00051	4.03087	0.0446749	0.98889	0.49636	0.332337	0.670557
	ENSMUSG00000001095.5	Slc13a2	1.76012	0.70924	2.70765	1.62624	0.488484	0.09474	0.111517	1.02599	0.176796	0.966753	0.379505	1.70081	0.969242	4.02114	0.0449332	0.817724	0.480784	0.394911	1.04059
	ENSMUSG00000079235.10	Ccdc13	1.18041	3.07166	1.92441	0.965773	0.786931	0.290167	0.020173	0.169696	1.00411	1.04593	0.454215	1.78556	0.937728	3.97236	0.0462528	0.950717	0.532447	0.421112	0.927119
	ENSMUSG00000115472.1	AC156574.2	0	1.10655	0.561309	1.83685	0	0	0	0	0	0.389412	0	0.876177	0.907796	6.83444	0.0089417	0.78375	0.894511	0	#NUM!
	ENSMUSG00000107806.1	Gm19726	0	0.772833	0	2.70452	0	0	0	0	0	0.386373	0	0.869338	0.902528	4.81418	0.0282265	1.27655	1.46841	0	#NUM!
	ENSMUSG00000081161.1	Gm12783	0.457701	2.31663	3.04691	1.38445	0.130915	0.489228	1.32044	0	0.58246	1.08097	0.504609	1.80142	0.896771	4.22997	0.0397162	1.12489	0.624445	0.516274	1.02312
	ENSMUSG00000038980.1	Rbbp8nl	1.20398	1.14696	1.80988	1.46371	0.125192	0.610634	0.163154	0.451589	0.379777	0.817208	0.346069	1.40613	0.837964	5.09996	0.0239264	0.302414	0.215068	0.202799	0.586007
	ENSMUSG00000095387.5	Trav6d-4	0	1.44819	2.37217	3.93534	0	0.559184	2.68878	0	0	1.22263	0.649593	1.93893	0.833179	5.20183	0.0225631	1.65062	0.851306	1.16537	1.794
	ENSMUSG00000089937.1	Gm7281	2.22091	1.24024	0	0.942637	0.067129	0.124691	0	0.640707	0.076409	0.590303	0.181787	1.10095	0.830069	7.01565	0.00808005	0.914853	0.830969	0.260368	1.43227
	ENSMUSG00000083008.1	Gm12053	0	0	2.20878	0.812779	0	0	0	0	0	0.335729	0	0.75539	0.811791	4.77652	0.0288503	1.04193	1.37933	0	#NUM!
	ENSMUSG00000072676.12	Tmem254a	1.74873	1.05422	1.7072	1.40771	0.182008	1.22479	0.419456	0.110238	0.181712	0.892896	0.423641	1.47947	0.800444	5.22919	0.0222109	0.321636	0.2174	0.46287	1.0926
	ENSMUSG00000106105.1	Gm4525	0	1.39317	0.72406	0.798433	0	0	0	0	0	0.323963	0	0.728916	0.789868	4.77895	0.0288096	0.570791	0.783069	0	#NUM!
	ENSMUSG00000089989.10	Gm45713	0.115374	1.43338	0.618447	0.853669	0.083843	0	0	0	0	0.344968	0.0167686	0.755217	0.787658	28.4709	9.51159e-08	0.547023	0.724325	0.0374957	2.23607
	ENSMUSG00000083588.1	Gm8051	0.965408	3.39267	0.140816	1.43221	0	0.660354	1.35529	0.097194	0.099476	0.904824	0.442463	1.48278	0.78342	6.31581	0.0119666	1.38067	0.931141	0.573008	1.29504
	ENSMUSG00000069303.6	Hist1h2br	0.079468	0.403927	3.69366	0.566096	0.207174	0.243419	0.402666	0.075654	0.430344	0.678045	0.271851	1.18579	0.781223	4.68961	0.0303455	1.68411	1.42025	0.146388	0.538484
	ENSMUSG00000111184.1	THSD8	1.22875	2.02622	0	0.619357	0	0	0.843276	0.020445	0.037297	0.530594	0.180204	0.968582	0.738121	6.1281	0.013305	0.865331	0.8934	0.370998	2.05877
	ENSMUSG00000113872.1	Gm47474	0	0.936203	1.29467	0.620218	0	0.217856	0	0	0	0.340994	0.0435712	0.712773	0.714805	9.03574	0.00264752	0.549283	0.770629	0.0974282	2.23607
	ENSMUSG00000030858.10	1700007K09Rik	0.379068	1.11281	0.545663	0.644482	0.045976	0	0	0.046852	0.049693	0.313838	0.0285042	0.670506	0.699737	8.35872	0.00383841	0.314554	0.469129	0.0260569	0.914143
	ENSMUSG00000083065.1	Gm13195	0.459034	1.31921	0.680247	0	0	0	0	0	0	0.273166	0	0.614623	0.691197	4.80918	0.0283085	0.548549	0.892497	0	#NUM!
	ENSMUSG00000111581.1	Gm47364	0	1.65112	0.570187	0	0	0	0	0	0	0.246812	0	0.555327	0.637218	4.83536	0.0278818	0.778408	1.40171	0	#NUM!
	ENSMUSG00000108484.1	Gm18537	0.417497	0.67264	0.738287	1.28469	0.424522	0.190443	0.243693	0	0	0.441308	0.171732	0.778278	0.601839	4.44055	0.0350949	0.364863	0.468808	0.179175	1.04334
	ENSMUSG00000090067.1	Gm2976	0.393363	1.03465	0.115206	0.786939	0.149374	0	0	0.078757	0	0.284254	0.0456262	0.582539	0.597874	7.56354	0.0059561	0.4084	0.701068	0.0672802	1.4746
	ENSMUSG00000071671.5	Gm10343	0.240022	0.702464	0.346139	0.75878	0	0	0	0	0	0.227489	0	0.511851	0.596316	6.89578	0.00863996	0.257332	0.502747	0	#NUM!
	ENSMUSG00000102566.1	Gm37037	0.362554	0.708975	0.526013	0.589281	0	0	0	0.122381	0	0.256578	0.0244762	0.546706	0.594312	7.82847	0.00514297	0.144319	0.26398	0.0547304	2.23607
	ENSMUSG00000101751.1	Gm2427	0.607253	1.10902	0.432244	0.630504	0.095681	0.087555	0.111034	0.179246	0.166866	0.379934	0.128076	0.694755	0.587212	6.16138	0.0130569	0.290007	0.417423	0.0421451	0.329062
	ENSMUSG00000103290.1	Ighv1-23	0	0.299418	0.882214	0.967989	0	0.185093	0	0	0	0.259413	0.0370186	0.537405	0.568056	4.95564	0.0260057	0.465381	0.865977	0.0827761	2.23607
	ENSMUSG00000106784.1	Gm43309	0.502049	1.32353	0.585314	0.165158	0.281694	0.171684	0	0.101199	0	0.347848	0.110915	0.644013	0.565473	4.00872	0.0452654	0.488073	0.757862	0.119955	1.0815
	ENSMUSG00000076745.4	Tcrg-V4	0.477746	1.57643	0.173331	0.971326	0	0.40802	0.554293	0.120917	0	0.475785	0.216646	0.799708	0.564854	4.3882	0.0361886	0.613394	0.767023	0.251826	1.16238
	ENSMUSG00000091478.2	Gm10039	0.827089	1.08021	0	0	0	0	0	0	0	0.211922	0	0.476825	0.562499	12.2697	0.000460384	0.560203	1.17486	0	#NUM!
	ENSMUSG00000081874.1	Gm14983	0.262555	0.383496	0.756281	0.412535	0	0	0	0	0	0.201652	0	0.453717	0.539746	5.86291	0.0154632	0.211908	0.467049	0	#NUM!
	ENSMUSG00000075036.1	Gm10805	0	0	0.81881	1.13906	0	0	0	0	0.14373	0.233511	0.028746	0.489467	0.53391	5.04785	0.0246565	0.580113	1.18519	0.064278	2.23607
	ENSMUSG00000099835.1	Gm29668	0	0	0.41006	1.35175	0	0	0	0	0	0.195757	0	0.440453	0.526522	4.85921	0.027499	0.637543	1.44747	0	#NUM!
	ENSMUSG00000059461.7	Gm7331	0.328884	0	0.934058	0.489843	0	0	0	0	0	0.194754	0	0.438196	0.524261	9.07181	0.0025958	0.388378	0.88631	0	#NUM!
	ENSMUSG00000112205.1	Gm47546	0.246305	0	0.708791	0.774089	0	0	0	0	0	0.192132	0	0.432296	0.51833	5.88213	0.0152953	0.371817	0.860098	0	#NUM!
	ENSMUSG00000078886.12	Gm2026	0.729486	0.857164	1.09196	1.03704	0	0	1.3292	0.181028	0.224278	0.605573	0.346901	0.928913	0.518144	5.55336	0.0184453	0.166528	0.179272	0.558601	1.61026
	ENSMUSG00000114700.1	Gm19010	0.699716	0.68071	0.515278	0.394147	0.056187	0.299421	0	0.115911	0.060967	0.313593	0.106497	0.572463	0.507026	6.00185	0.0142909	0.144888	0.253096	0.115384	1.08345
	ENSMUSG00000058869.9	Gm4832	0.673028	0.454671	0	0.536168	0	0	0	0	0	0.184874	0	0.415967	0.501787	8.91399	0.00282994	0.291579	0.700967	0	#NUM!
	ENSMUSG00000070933.10	Speer4d	0.820596	0.69424	0.30549	0.207564	0.052681	0	0	0.166943	0.105116	0.261403	0.064948	0.506973	0.50087	8.16439	0.00427209	0.296462	0.58477	0.0717694	1.10503
	ENSMUSG00000103886.1	Gm37007	0	1.1933	0	0.428283	0	0	0	0	0	0.180176	0	0.405396	0.490976	4.78017	0.0287893	0.562734	1.38811	0	#NUM!
	ENSMUSG00000095762.1	Gm16378	0.232594	0.66737	0.339983	0.37735	0	0	0	0	0	0.1797	0	0.404324	0.489876	6.13893	0.0132237	0.185788	0.459503	0	#NUM!
	ENSMUSG00000083018.1	Gm13555	0.272473	0.397768	0	0.856566	0	0	0	0	0	0.169645	0	0.381702	0.466446	4.84475	0.0277305	0.357483	0.936549	0	#NUM!
	ENSMUSG00000042045.6	Sln	2.58854	0	0	0	0	0	0.452264	0	0.517846	0.395406	0.194022	0.647135	0.464129	9.03119	0.00265411	1.29427	2	0.266685	1.37451
	ENSMUSG00000070343.3	Gm10288	0	0.9192	0.585833	0	0	0	0	0	0	0.167226	0	0.376258	0.460751	13.5355	0.000234094	0.455283	1.21003	0	#NUM!
	ENSMUSG00000089678.8	Agxt2	0.3719	0.856583	0.754543	0.116959	0.295533	0.035069	0	0.085059	0.143366	0.295446	0.111805	0.524996	0.455901	4.48234	0.0342468	0.342819	0.652993	0.116035	1.03783
	ENSMUSG00000106620.1	Trav7-5	0	0.6761	0.332437	0.438146	0	0	0	0	0	0.160743	0	0.361671	0.445378	4.99854	0.0253687	0.280698	0.776115	0	#NUM!
	ENSMUSG00000103254.1	Ighv1-15	0.408577	0.299418	0.588143	0.322663	0	0.185093	0	0	0	0.200433	0.0370186	0.4047	0.437821	4.20401	0.0403286	0.130997	0.323689	0.0827761	2.23607
	ENSMUSG00000109493.1	Gm45208	0.459389	0.986414	0.821513	0.296111	0.06338	0.325098	0.589142	0.068992	0.075703	0.409527	0.224463	0.640857	0.4223	4.3379	0.0372728	0.318238	0.496582	0.232038	1.03375
	ENSMUSG00000048559.5	4930555K19Rik	0.533531	0	0.778193	0	0	0	0	0	0	0.145747	0	0.327931	0.40918	7.65259	0.00566908	0.391614	1.1942	0	#NUM!
	ENSMUSG00000083760.1	Gm14524	0.09439	0.691873	0.211254	0.899403	0.045856	0.080844	0.357699	0	0.115461	0.27742	0.119972	0.47423	0.396499	4.48816	0.0341305	0.383656	0.809008	0.139599	1.1636
	ENSMUSG00000114951.1	Gm20784	0.001009	0.341465	0	0.997997	0	0	0	0	0.079493	0.157774	0.0158986	0.335118	0.394211	13.3709	0.000255554	0.470242	1.40321	0.0355504	2.23607
	ENSMUSG00000082689.1	Gm14156	0.178415	0	0.782104	0.295447	0	0	0	0	0	0.139552	0	0.313991	0.393956	10.4692	0.00121383	0.334885	1.06654	0	#NUM!
	ENSMUSG00000100351.1	Gm7867	0	0.585101	0.230085	0.510584	0	0	0	0.069507	0	0.155031	0.0139014	0.331442	0.393073	7.27619	0.00698747	0.268677	0.810629	0.0310845	2.23607
	ENSMUSG00000091014.2	Gm5244	0.082281	0.479471	0.608567	1.26583	0	0.422622	0.688194	0.040639	0	0.398623	0.230291	0.609037	0.387198	3.88309	0.0487747	0.491812	0.807523	0.31173	1.35363
	ENSMUSG00000022181.16	C6	0.106118	1.29012	0.628078	2.58659	0.068316	0.438609	2.67553	0	0.064673	0.873115	0.649426	1.15273	0.384201	4.03251	0.0446314	1.07168	0.929691	1.14574	1.76424
	ENSMUSG00000078877.11	Gm14295	0.203436	0.45607	0.635235	0.4832	0.131081	0.064491	0.190612	0.068973	0.093597	0.258522	0.109751	0.444485	0.38032	4.34423	0.0371345	0.179	0.402714	0.0523587	0.477069
	ENSMUSG00000096020.2	Ighv1-75	0.902863	0	0.287208	0	0	0	0	0	0	0.13223	0	0.297518	0.375754	7.52023	0.00610099	0.425669	1.43074	0	#NUM!
	ENSMUSG00000058883.16	Zfp708	0.305026	0.257825	0.472895	0.419832	0.104834	0.020577	0	0.07691	0.09472	0.194735	0.0594082	0.363895	0.364473	6.20045	0.0127718	0.0995429	0.273549	0.0465133	0.782944
	ENSMUSG00000108818.1	Gm44869	0	0	0.83885	0.307347	0	0	0	0	0	0.127355	0	0.286549	0.363507	4.77652	0.0288503	0.395681	1.38085	0	#NUM!
	ENSMUSG00000102301.1	Ighv8-2	0	0.560375	0.275055	0.302519	0	0	0	0	0	0.126439	0	0.284487	0.361193	4.77895	0.0288096	0.229101	0.80531	0	#NUM!
	ENSMUSG00000094212.3	Trav14-3	0	0	0.549039	0.518322	0	0	0	0	0	0.118596	0	0.26684	0.341235	5.29717	0.0213601	0.308376	1.15566	0	#NUM!
	ENSMUSG00000029757.16	Dync1i1	0.060282	0.1383	0.716102	0.228224	0.02636	0	0	0.043772	0.008602	0.135738	0.0157468	0.285727	0.340044	4.32631	0.0375276	0.295008	1.03248	0.0190067	1.20702
	ENSMUSG00000116378.1	Gcat	0.274324	0.484146	0.438586	0.137125	0	4e-06	0.270138	0	0	0.178258	0.0540284	0.333545	0.339353	16.9832	3.77124e-05	0.158957	0.476569	0.120809	2.23603
	ENSMUSG00000058246.7	Gm10037	0.206468	0.546881	0.582468	0	0	0.090507	0.162734	0	0.048335	0.181933	0.0603152	0.333954	0.331216	3.93957	0.0471627	0.279807	0.837859	0.068594	1.13726
	ENSMUSG00000018924.6	Alox15	0.064597	0.321614	0.401728	0.564609	0.018459	0.110685	0.067003	0.116694	0.029507	0.188322	0.0684696	0.338137	0.32468	4.89108	0.0269957	0.208511	0.616647	0.0450806	0.658403
	ENSMUSG00000083835.1	Gm11898	0	0.229202	0.225397	0.499643	0	0	0	0	0	0.106027	0	0.238561	0.308664	4.79591	0.0285274	0.204398	0.856799	0	#NUM!
	ENSMUSG00000081329.1	Gm12492	0.06542	0.477663	0.096172	0.330091	0.062708	0	0	0	0	0.114673	0.0125416	0.242337	0.295075	5.7819	0.016192	0.19642	0.810528	0.0280439	2.23607
	ENSMUSG00000094153.1	Gm8807	0.343016	0.125443	0.125635	0.622278	0	0.146694	0.201457	0	0	0.173836	0.0696302	0.304093	0.285935	4.24718	0.0393155	0.235598	0.774758	0.0972911	1.39725
	ENSMUSG00000097565.1	Gm26965	0	0	0.491421	0.370079	0	0	0	0	1.6e-05	0.095724	3.2e-06	0.215375	0.281397	24.778	6.43291e-07	0.253579	1.17739	7.15542e-06	2.23607
	ENSMUSG00000081625.1	Rps12-ps7	0.624574	0.229202	0	0	0	0	0	0	0	0.094864	0	0.213444	0.279108	6.00978	0.0142268	0.294614	1.38029	0	#NUM!
	ENSMUSG00000099624.1	Gm7889	0.107996	0.406587	0.779181	0.680234	0	0	1.11833	0	0.049281	0.349068	0.233522	0.493499	0.275913	4.01568	0.0450791	0.301469	0.61088	0.495083	2.12007
	ENSMUSG00000015854.7	Cd5l	0.011168	0.227087	0.166482	1.05227	0	0.095675	0.45914	0.032743	0.071364	0.235103	0.131784	0.364252	0.269511	4.12322	0.0422986	0.467605	1.28374	0.18661	1.41602
	ENSMUSG00000043050.8	Tnp2	0	0.197613	0.198783	0.568054	0	0	0.160034	0	0	0.124943	0.0320068	0.241113	0.266181	5.23182	0.0221773	0.237143	0.983535	0.0715694	2.23607
	ENSMUSG00000004821.1	Tmed11	0.474012	0.172608	0.175368	0.270386	0	0.135265	0	0.077994	0.083209	0.154316	0.0592936	0.273093	0.265236	4.40161	0.0359049	0.141449	0.51795	0.0585764	0.987904
	ENSMUSG00000074483.2	Bglap	0.612866	0.161698	0	0	0	0	0	0	0	0.0860627	0	0.193641	0.255369	4.9068	0.0267511	0.289692	1.49602	0	#NUM!
	ENSMUSG00000031257.14	Nox1	0.060604	0.501385	0.258364	0.254519	0.044343	0.023702	0.200525	0	0.047899	0.154593	0.0632938	0.268718	0.254831	3.85643	0.0495556	0.180512	0.671754	0.0790603	1.2491
	ENSMUSG00000030004.6	Nat8	0.345047	0.30105	0.273483	0.07962	0.136577	0	0.05537	0.045152	0.024384	0.140076	0.0522966	0.2498	0.248156	4.57389	0.0324627	0.117219	0.46925	0.0516665	0.987952
	ENSMUSG00000096498.3	Ighv2-5	0.204568	0	0.535222	0	0	0	0	0	0	0.0821989	0	0.184947	0.244823	5.85886	0.0154988	0.252645	1.36604	0	#NUM!
	ENSMUSG00000083199.1	Gm9432	0.24516	0.245417	0.122333	0.481549	0	0.212081	0.199198	0	0	0.167304	0.0822558	0.273615	0.234887	4.64283	0.0311836	0.150253	0.54914	0.112725	1.37043
	ENSMUSG00000107539.1	Gm44790	0.404616	0.74255	0	0	0	0	0.358696	0	0.129262	0.18168	0.0975916	0.286791	0.229437	4.38667	0.0362209	0.358746	1.2509	0.156326	1.60184
	ENSMUSG00000074516.6	Gm10709	0	0.231497	0.140516	0.316685	0	0	0	0	0	0.076522	0	0.172175	0.229187	5.76126	0.0163834	0.135461	0.786764	0	#NUM!
	ENSMUSG00000032999.10	Nlrp4f	0.018206	0.294292	0.403784	0.031881	0	0.079316	0	0.01184	0.006489	0.0939787	0.019529	0.187041	0.219467	5.03195	0.0248839	0.192406	1.02868	0.0337876	1.73013
	ENSMUSG00000107065.1	Gm43155	0	0.24873	0.124432	0.282335	0	0	0	0	0	0.072833	0	0.163874	0.218935	5.83062	0.0157496	0.128639	0.784986	0	#NUM!
	ENSMUSG00000072381.3	Gm10355	0	0	0.135929	0.512351	0	0	0	0	0	0.0720311	0	0.16207	0.216697	6.03338	0.0140378	0.242153	1.49412	0	#NUM!
	ENSMUSG00000095195.7	Gm3005	0.504007	0.333059	0.16786	0	0	0.421641	0	0	0	0.158507	0.0843282	0.251231	0.206547	6.90057	0.00861683	0.216533	0.861885	0.188564	2.23607
	ENSMUSG00000081049.1	Rps24-ps3	0.147336	0	0.217841	0.241018	0	0	0	0	0	0.067355	0	0.151549	0.203575	3.98659	0.0458638	0.108604	0.716624	0	#NUM!
	ENSMUSG00000051985.12	Igfn1	1.304	0	0	0	0	0.059937	0.169536	0	0.541819	0.230588	0.154258	0.326	0.200115	4.82608	0.0280324	0.652	2	0.227445	1.47444
	ENSMUSG00000030897.5	Cnga4	0.401254	0.207168	0.106402	0.141061	0.035681	0.061115	0.027933	0.06966	0.111981	0.129139	0.061274	0.213971	0.193937	4.10641	0.0427211	0.131666	0.615346	0.033197	0.54178
	ENSMUSG00000067147.7	Rpl7a-ps11	0	0	0.27095	0.304817	0	0.002781	0	0	0.00025	0.0643109	0.0006062	0.143942	0.193139	9.73307	0.00180982	0.166784	1.15869	0.00122056	2.01346
	ENSMUSG00000083761.1	Pgam1-ps1	0.040717	0.119081	0.180742	0.347945	0	0.140268	0	0	0	0.0920837	0.0280536	0.172121	0.189206	4.3731	0.0365105	0.130472	0.758022	0.0627298	2.23607
	ENSMUSG00000098004.1	Gm27027	0	0.233557	0.324432	0	0	0	0	0	0	0.0619988	0	0.139497	0.188397	6.28007	0.0122103	0.165295	1.18493	0	#NUM!
	ENSMUSG00000082624.1	Gm12535	0	0	0.259565	0.294205	0	0	0	0	0	0.06153	0	0.138442	0.187061	4.79469	0.0285477	0.160484	1.15921	0	#NUM!
	ENSMUSG00000110332.1	Gm19935	0.165692	0.321407	0.081983	0.142924	0.054461	0	0.066347	0.054294	0	0.0985676	0.0350204	0.178002	0.186682	4.11856	0.0424152	0.101926	0.572612	0.0323405	0.923475
	ENSMUSG00000081559.3	Gm12411	0	0.392569	0	0.152506	0	0	0	0	0	0.0605639	0	0.136269	0.184304	4.82265	0.0280881	0.185375	1.36036	0	#NUM!
	ENSMUSG00000082901.1	Gm14323	0.109444	0.160037	0.081393	0.279602	0	0.094997	0	0	0	0.0806081	0.0189994	0.157619	0.184007	4.53965	0.0331185	0.0875917	0.555718	0.0424839	2.23607
	ENSMUSG00000030069.15	Prok2	0.04569	0.266361	0.135052	0.155725	0	0.028566	0.041166	0	0	0.0747289	0.0139464	0.150707	0.182539	4.99298	0.0254503	0.0906912	0.601772	0.0196096	1.40607
	ENSMUSG00000040963.15	Asgr2	0.145018	0.316784	0.243369	0.447624	0.017713	0.41296	0.230085	0.035746	0	0.205478	0.139301	0.288199	0.177206	4.60615	0.0318575	0.127468	0.442291	0.178916	1.28438
	ENSMUSG00000024105.2	Themis3	0.077437	0.299976	0.057692	0.134955	0.038614	0	0	0.025242	0	0.0704351	0.0127712	0.142515	0.173905	8.15914	0.00428447	0.109972	0.771649	0.0181155	1.41846
	ENSMUSG00000079993.2	Gm11799	0.198833	0	0.144913	0.163579	0	0	0	0	0	0.0563694	0	0.126831	0.172271	4.87437	0.0272584	0.08746	0.689578	0	#NUM!
	ENSMUSG00000020159.8	Gabrp	0.151003	0.896306	0.107788	0.022985	0.01316	0.362347	0	0.051247	0.319304	0.213793	0.149212	0.294521	0.171773	3.86273	0.0493698	0.404699	1.37409	0.176585	1.18345
	ENSMUSG00000018907.10	Alox12e	0.073381	0.52375	0.136379	0	0.088037	0	0.106111	0.017916	0.048335	0.110434	0.0520798	0.183377	0.169666	8.40087	0.00375042	0.233658	1.27419	0.0450161	0.864367
	ENSMUSG00000070844.10	Vmn2r42	0.062802	0.331417	0.067204	0.030336	0	0	0	0.011263	0	0.0558913	0.0022526	0.12294	0.164034	5.39198	0.0202295	0.139954	1.13839	0.00503697	2.23607
	ENSMUSG00000081233.1	Gm12857	0.299466	0.174825	0	0	0	0	0	0	0	0.052699	0	0.118573	0.161659	8.0233	0.00461794	0.146066	1.23187	0	#NUM!
	ENSMUSG00000112165.1	Gm48851	0	0	0.266109	0.203389	0	0	0	0	0	0.0521664	0	0.117375	0.160113	5.8273	0.0157794	0.13793	1.17513	0	#NUM!
	ENSMUSG00000108396.1	Gm6905	0	0.347788	0.116106	0	0	0	0	0	0	0.0515438	0	0.115973	0.158303	4.76335	0.029072	0.163949	1.41368	0	#NUM!
	ENSMUSG00000082159.2	Gm7910	0.06909	0.050292	0.204746	0.237262	0	0.118309	0	0	0	0.0755221	0.0236618	0.140347	0.155734	4.41867	0.0355476	0.0943879	0.67253	0.0529094	2.23607
	ENSMUSG00000081364.1	Gm8595	0.214934	0.313495	0	0	0	0.091977	0	0	0	0.068934	0.0183954	0.132107	0.152713	4.57225	0.0324938	0.157762	1.1942	0.0411334	2.23607
	ENSMUSG00000116252.1	MF597757.1	0	0.180545	0.254305	0.00015	0	0	0	0	0	0.0483333	0	0.10875	0.148934	22.7066	1.88721e-06	0.129049	1.18666	0	#NUM!
	ENSMUSG00000099886.1	Gm2324	0.247242	0.072095	0.072994	0.084054	0	0	0	0	0.05188	0.0586961	0.010376	0.119096	0.147442	4.55151	0.0328898	0.0856034	0.718775	0.0232014	2.23607
	ENSMUSG00000060417.6	Gm8603	0.103779	0.171454	0.092652	0.115281	0	0	0	0	0.065055	0.0609134	0.013011	0.120791	0.145868	6.58431	0.0102881	0.0350158	0.289886	0.0290935	2.23607
	ENSMUSG00000063011.6	Msln	0.492094	0.077684	0	0	0.021374	0	0.051752	0	0.091162	0.0815629	0.0328576	0.142445	0.145483	7.85645	0.00506398	0.235959	1.6565	0.0388829	1.18338
	ENSMUSG00000106309.1	Gm40414	0	0.156708	0.263003	0	0	0	0	0	0	0.0466346	0	0.104928	0.143952	3.88583	0.0486951	0.128697	1.22653	0	#NUM!
	ENSMUSG00000024957.8	Kcnk4	0.040903	0.07923	0.12187	0.332491	0.01359	0.023359	0.098822	0.013336	0.029013	0.0836238	0.035624	0.143623	0.143112	4.30673	0.0379618	0.130182	0.906413	0.0359527	1.00923
	ENSMUSG00000029320.11	1700016H13Rik	0	0.143873	0.218454	0.095568	0.054951	0	0	0	0	0.0569829	0.0109902	0.114474	0.140594	4.99298	0.0254504	0.0915385	0.799646	0.0245748	2.23607
	ENSMUSG00000080748.1	Gm15661	0	0.2944	0.098781	0	0	0	0	0	0	0.0436868	0	0.0982953	0.135266	4.76263	0.0290841	0.138782	1.41189	0	#NUM!
	ENSMUSG00000087052.1	Gm8093	0.085079	0.26248	0.05691	0.275509	0.025792	0.1589	0.121575	0	0.025879	0.112458	0.0664292	0.169994	0.133714	3.91903	0.0477425	0.115015	0.676583	0.069463	1.04567
	ENSMUSG00000094076.7	Gm4767	0	0.072488	0.086124	0.424338	0	0.226781	0	0	0	0.0899701	0.0453562	0.145737	0.132282	4.35923	0.036809	0.189541	1.30056	0.10142	2.23607
	ENSMUSG00000039492.7	Ccdc27	0.140972	0.110247	0.177834	0.056782	0.032496	0.074321	0	0.03179	0	0.0693824	0.0277214	0.121459	0.125927	4.64384	0.0311651	0.0512111	0.421633	0.0306097	1.10419
	ENSMUSG00000089865.2	Gm44503	0.16925	0.331962	0	0	0	0.175	0	0	0	0.0751347	0.035	0.125303	0.120683	8.33761	0.00388326	0.159207	1.27058	0.0782624	2.23607
	ENSMUSG00000042750.7	Bex2	0	0.134843	0.13742	0.053164	0	0	0	0	0	0.0361586	0	0.0813568	0.112843	7.72778	0.00543777	0.066877	0.822022	0	#NUM!
	ENSMUSG00000115592.1	AC163646.3	0	0	0.114873	0.210486	0	0	0	0	0	0.036151	0	0.0813398	0.11282	5.84772	0.0155973	0.101711	1.25045	0	#NUM!
	ENSMUSG00000080914.1	Gm7129	0	0.156779	0.119987	0.046504	0	0	0	0	0	0.0359189	0	0.0808175	0.112123	8.6255	0.00331489	0.070742	0.87533	0	#NUM!
	ENSMUSG00000105634.1	Gm43367	0	0.079455	0.240909	0	0	0	0	0	0	0.035596	0	0.080091	0.111153	4.75967	0.0291341	0.113566	1.41797	0	#NUM!
	ENSMUSG00000035775.2	Krt20	0.035696	0.120983	0.141875	0.103757	0	0.040774	0.057535	0	0	0.0556244	0.0196618	0.100578	0.11017	7.26422	0.00703419	0.0459768	0.457127	0.0275675	1.40208
	ENSMUSG00000082789.3	Gm13284	0.069303	0.226294	0	0	0	0	0	0	0	0.0328441	0	0.0738992	0.102859	3.97983	0.0460481	0.10672	1.44413	0	#NUM!
	ENSMUSG00000021565.16	Slc6a19	0.041652	0.112292	0.071059	0.125044	0.005966	0.020393	0.01442	0.005805	0.019051	0.0461869	0.013127	0.0875117	0.102216	7.6963	0.00553342	0.038282	0.43745	0.0069723	0.531142
	ENSMUSG00000082322.2	Gm9164	0.05267	0.153247	0.039107	0.045472	0	0	0	0	0	0.0322773	0	0.072624	0.101144	8.75787	0.0030827	0.0540335	0.744017	0	#NUM!
	ENSMUSG00000083794.1	Gm16123	0.173629	0.068809	0.117509	0	0.04712	0	0.038103	0	0	0.0494633	0.0170446	0.0899868	0.0999277	5.5896	0.0180674	0.0737103	0.819124	0.023556	1.38202
	ENSMUSG00000025082.8	Vwa2	0.120344	0.075951	0.039061	0.128347	0.010499	0.008966	0.012684	0.045926	0.016757	0.0509483	0.0189664	0.0909257	0.0984464	4.74037	0.0294627	0.0415531	0.457	0.0153531	0.809491
	ENSMUSG00000092552.1	Gm4287	0.183556	0	0.090047	0	0	0	0	0	0	0.0304003	0	0.0684007	0.0954529	4.90554	0.0267707	0.0877242	1.2825	0	#NUM!
	ENSMUSG00000084131.1	Rpl3-ps2	0.067439	0	0.074997	0.130131	0	0	0	0	0	0.0302852	0	0.0681418	0.0951031	9.99879	0.00156643	0.0533337	0.782688	0	#NUM!
	ENSMUSG00000108947.1	Olfr1422-ps1	0	0.059934	0	0.210972	0	0	0	0	0	0.0301007	0	0.0677265	0.0945421	4.81418	0.0282265	0.0995887	1.47045	0	#NUM!
	ENSMUSG00000089785.2	Slc25a5-ps	0.103994	0.09442	0.038749	0.06796	0	0	0.031427	0.012713	0	0.038807	0.008828	0.0762807	0.0933742	8.53657	0.00348081	0.0292969	0.384067	0.0137805	1.561
	ENSMUSG00000110587.1	Gm7344	0.041264	0.029995	0.061362	0.214592	0	0	0.099419	0	0	0.0496258	0.0198838	0.0868032	0.091686	4.60716	0.0318387	0.0861747	0.992759	0.0444615	2.23607
	ENSMUSG00000112127.1	Gm48886	0.18068	0	0.06675	0	0	0	0	0	0	0.0274922	0	0.0618575	0.0865902	6.00836	0.0142383	0.0852358	1.37794	0	#NUM!
	ENSMUSG00000086926.2	Gm6226	0	0.066209	0.138638	0.041533	0	0	0	0	0	0.0273756	0	0.061595	0.0862335	7.97003	0.00475581	0.058176	0.944492	0	#NUM!
	ENSMUSG00000067996.5	Bpifb9b	0.065857	0.09565	0.065453	0.038309	0.010963	0	0	0.0001	0.011691	0.0320026	0.0045508	0.0663172	0.0860862	8.16339	0.00427443	0.0234224	0.353188	0.00619128	1.36048
	ENSMUSG00000096591.1	Gm13272	0	0.060311	0	0.185522	0	0	0	0	0	0.0273148	0	0.0614582	0.0860476	4.97194	0.0257617	0.0874593	1.42307	0	#NUM!
	ENSMUSG00000111473.1	LOC102637012	0.103373	0.075052	0.102802	0.13552	0.017239	0.029521	0.145979	0	0.009184	0.0687411	0.0403846	0.104187	0.0858672	4.40858	0.0357586	0.0247197	0.237263	0.0600173	1.48614
	ENSMUSG00000096157.2	Gm5472	0	0.060977	0.062856	0.172117	0.014137	0.048237	0	0	0	0.0398138	0.0124748	0.0739875	0.0850912	3.85634	0.0495584	0.0716397	0.968267	0.0209079	1.67601
	ENSMUSG00000054662.8	Ano9	0.038653	0.225962	0.100114	0.012167	0.007025	0.066183	0.077694	0	0.007666	0.059496	0.0317136	0.094224	0.0848656	5.25009	0.0219457	0.0952384	1.01077	0.0370672	1.16881
	ENSMUSG00000072754.9	Lrcol1	0.046008	0.057421	0	0.13589	0	0	0	0	0	0.026591	0	0.0598298	0.0838325	4.86015	0.0274839	0.0564553	0.943599	0	#NUM!
	ENSMUSG00000113356.1	Gm48012	0	0.055369	0.113335	0.092729	0	0	0	0	0.028207	0.0321822	0.0056414	0.0653583	0.0832227	3.94713	0.0469514	0.0497407	0.761047	0.0126146	2.23607
	ENSMUSG00000020609.14	Apob	0.017393	0.171667	0.061801	0.023904	0.006085	0.002591	0.007341	0.030968	0.008082	0.036648	0.0110134	0.0686912	0.080043	6.14908	0.0131481	0.0713883	1.03926	0.0113522	1.03076
	ENSMUSG00000029755.10	Dlx5	0.034124	0.074387	0.08325	0.088948	0	0	0.044973	0.018277	0	0.0382177	0.01265	0.0701772	0.0797141	4.36196	0.03675	0.0247709	0.352977	0.0197263	1.55939
	ENSMUSG00000070690.7	5830473C10Rik	0	0.068406	0.043323	0.169141	0	0.016592	0.046865	0	0	0.0382586	0.0126914	0.0702175	0.0797094	6.07093	0.0137425	0.0717471	1.02178	0.02041	1.60817
	ENSMUSG00000052415.5	Tchh	0.039197	0.093088	0.143709	0.031253	0.021478	0.036639	0.008644	0.010419	0.019032	0.0448288	0.0192424	0.0768117	0.0792689	3.93439	0.0473084	0.0523788	0.681912	0.0111564	0.579783
	ENSMUSG00000049436.4	Upk1b	0.341793	0	0	0	0	0	0.063534	0	0.083937	0.0543627	0.0294942	0.0854483	0.0763552	4.52235	0.0334548	0.170897	2	0.0410258	1.39098
	ENSMUSG00000080916.3	Gm12463	0	0	0.099956	0.115871	0	0	0	0	0	0.0239808	0	0.0539567	0.0758157	4.79469	0.0285477	0.0626418	1.16096	0	#NUM!
	ENSMUSG00000058447.8	Gm26920	0.156361	0	0.155024	0	0	0	0.12133	0	0	0.0480794	0.024266	0.0778463	0.073561	8.19719	0.00419553	0.0898908	1.15472	0.0542604	2.23607
	ENSMUSG00000022144.4	Gdnf	0.191642	0.00843	0.034677	0.061026	0	0.019903	0.070372	0.01133	0.012396	0.0455307	0.0228002	0.0739438	0.0703941	7.53138	0.00606336	0.0813504	1.10017	0.0275279	1.20735
	ENSMUSG00000111451.1	Gm47321	0	0	0.142944	0.055271	0	0	0	0	0	0.0220239	0	0.0495538	0.0697761	4.77652	0.0288503	0.0674922	1.362	0	#NUM!
	ENSMUSG00000045440.4	Insm2	0.074362	0.047988	0.061632	0.086677	0	0.014158	0.04001	0.008067	0.026429	0.0399248	0.0177328	0.0676647	0.0690999	4.24057	0.0394689	0.0166322	0.245803	0.0157524	0.888322
	ENSMUSG00000081494.1	Gm14130	0.028182	0.039736	0.08111	0.047126	0	0	0	0	0	0.0217949	0	0.0490385	0.0690676	5.89756	0.0151619	0.0227579	0.464083	0	#NUM!
	ENSMUSG00000050198.4	Olfr768	0.055389	0.046897	0.075818	0.056652	0.009266	0	0	0.013502	0.024643	0.0313519	0.0094822	0.058689	0.0686634	4.94043	0.0262355	0.0122133	0.208102	0.0103184	1.08819
	ENSMUSG00000082198.1	Gm14504	0	0.116541	0.047761	0.027893	0	0	0	0	0	0.021355	0	0.0480488	0.0677058	8.62662	0.00331286	0.0496864	1.03408	0	#NUM!
	ENSMUSG00000084159.1	Gm12696	0	0	0.137812	0.053457	0	0	0	0	0	0.0212521	0	0.0478172	0.0673871	4.8046	0.0283839	0.0650739	1.36089	0	#NUM!
	ENSMUSG00000037798.7	Mat1a	0.081625	0.107408	0.040152	0.023544	0.039833	0	0	0.006563	0.028703	0.0364253	0.0150198	0.0631822	0.0668811	4.98374	0.0255866	0.0382868	0.605974	0.0182046	1.21204
	ENSMUSG00000114809.1	Atp5c1-ps	0	0.044599	0.090994	0.052872	0	0	0	0	0	0.0209406	0	0.0471162	0.0664216	4.78191	0.0287602	0.0373482	0.792682	0	#NUM!
	ENSMUSG00000105532.1	Gm5279	0.122911	0.059685	0	0	0	0	0	0	0	0.0202884	0	0.045649	0.0643987	4.9068	0.0267511	0.0586915	1.28571	0	#NUM!
	ENSMUSG00000092560.2	Gm8750	0	0.15862	0.046377	0	0	0.02686	0	0	0	0.0257619	0.005372	0.0512493	0.0643754	5.05161	0.0246031	0.0748447	1.46041	0.0120122	2.23607
	ENSMUSG00000023930.13	Crisp2	0.121984	0	0	0.058551	0	0	0	0	0	0.0200594	0	0.0451338	0.0636876	4.89309	0.0269643	0.0581953	1.2894	0	#NUM!
	ENSMUSG00000115848.1	AC114008.2	0.113563	0.026535	0	0.038833	0	0	0	0	0	0.0198812	0	0.0447328	0.0631339	9.43864	0.00212461	0.0486641	1.08789	0	#NUM!
	ENSMUSG00000054031.13	Rdh18-ps	0.087093	0	0.091462	0	0	0	0	0	0	0.0198394	0	0.0446387	0.0630041	6.07695	0.0136957	0.0515752	1.15539	0	#NUM!
	ENSMUSG00000080773.1	Gm12955	0.085466	0	0.042465	0.049118	0	0	0	0	0	0.0196721	0	0.0442623	0.0624841	5.9774	0.0144904	0.0350414	0.791677	0	#NUM!
	ENSMUSG00000104103.1	Gm9517	0.045858	0.13012	0	0	0	0	0	0	0	0.0195531	0	0.0439945	0.0621141	5.02284	0.0250152	0.0613517	1.39453	0	#NUM!
	ENSMUSG00000096254.2	Olfr724	0.106472	0.064716	0	0	0	0	0	0	0	0.0190209	0	0.042797	0.0604583	7.00882	0.00811091	0.0522753	1.22147	0	#NUM!
	ENSMUSG00000051839.7	Gypa	0.049965	0.018145	0.074458	0.087103	0	0	0.060386	0	0.013296	0.0337059	0.0147364	0.0574177	0.0594404	4.11613	0.042476	0.0303835	0.529166	0.0261603	1.77522
	ENSMUSG00000116120.1	AC116487.2	0.023405	0.034004	0.069493	0.040495	0	0	0	0	0	0.0185997	0	0.0418492	0.0591465	5.86486	0.0154461	0.0197294	0.47144	0	#NUM!
	ENSMUSG00000082840.1	Gm16421	0	0.044658	0.045846	0.107347	0	0	0.037421	0	0	0.0261413	0.0074842	0.0494627	0.0588937	4.50538	0.0337885	0.0440958	0.891495	0.0167352	2.23607
	ENSMUSG00000061082.11	Plac1	0	0	0.113273	0.052842	0	0	0	0	0	0.0184572	0	0.0415288	0.0587027	4.77652	0.0288503	0.0539274	1.29856	0	#NUM!
	ENSMUSG00000058631.6	Vmn1r63	0.03624	0.017192	0.056731	0.109074	0	0.021053	0.030081	0	0.012982	0.0314837	0.0128232	0.0548092	0.0585998	3.97263	0.0462454	0.0396158	0.722794	0.0131763	1.02753
	ENSMUSG00000047509.1	Gm6776	0.062425	0.04722	0	0.055804	0	0	0	0	0	0.0183832	0	0.0413623	0.058472	4.98629	0.025549	0.0282687	0.683441	0	#NUM!
	ENSMUSG00000093789.3	Methig1	0.111917	0.069698	0	0.027804	0.015907	0	0.038592	0	0	0.0293242	0.0108998	0.0523547	0.0579811	4.64025	0.0312304	0.0489633	0.935221	0.0169436	1.55449
	ENSMUSG00000023978.5	Prph2	0.016491	0.035916	0.061504	0.090166	0.008253	0	0.039927	0	0	0.0280286	0.009636	0.0510193	0.0579538	4.52521	0.0333989	0.0319516	0.626265	0.0173062	1.79599
	ENSMUSG00000084202.1	Gm5398	0	0.039897	0.122422	0	0	0	0	0	0	0.0180354	0	0.0405797	0.0573875	4.76726	0.029006	0.0577121	1.42219	0	#NUM!
	ENSMUSG00000083898.2	Gm7340	0.023273	0.039123	0	0.10043	0	0	0	0	0.001042	0.0182076	0.0002084	0.0407065	0.0572626	12.2465	0.00046613	0.0429354	1.05476	0.000465997	2.23607
	ENSMUSG00000036949.16	Slc39a12	0.008304	0.072345	0.037164	0.08711	0	0.014229	0.04021	0	0	0.028818	0.0108878	0.0512307	0.0564565	5.56784	0.0182933	0.0354669	0.692298	0.0175113	1.60834
	ENSMUSG00000100044.1	Gm9553	0	0.117732	0.04005	0	0	0	0	0	0	0.0175313	0	0.0394455	0.0558141	4.76209	0.0290932	0.0555009	1.40703	0	#NUM!
	ENSMUSG00000046321.8	Hs3st2	0	0	0.125001	0.051492	0	0	0.02378	0	0	0.0222526	0.004756	0.0441233	0.0554468	5.18534	0.0227782	0.0591305	1.34012	0.0106347	2.23607
	ENSMUSG00000068218.6	Ssxb9	0.034063	0	0.119217	0	0	0	0	0	0	0.0170311	0	0.03832	0.0542511	4.34507	0.0371162	0.056271	1.46845	0	#NUM!
	ENSMUSG00000096879.2	Gm4858	0.102383	0.037182	0.01907	0.022305	0	0.021927	0	0.012515	0	0.0239313	0.0068884	0.045235	0.0539236	5.15253	0.0232125	0.0389065	0.860096	0.0100021	1.45202
	ENSMUSG00000072738.3	Gm16440	0	0.110579	0.036728	0	0	0	0	0	0	0.0163674	0	0.0368267	0.0521748	4.97987	0.0256439	0.0521275	1.41548	0	#NUM!
	ENSMUSG00000006056.13	Calcoco2	0.028045	0	0.021711	0.096737	0	0	0	0	0	0.016277	0	0.0366233	0.0518917	4.84351	0.0277504	0.0418365	1.14235	0	#NUM!
	ENSMUSG00000075512.4	Gm1587	0	0.026365	0.053983	0.062997	0	0	0	0	0	0.0159272	0	0.0358363	0.050796	5.82866	0.0157671	0.0285246	0.79597	0	#NUM!
	ENSMUSG00000073923.4	Olfr657	0	0.041271	0	0.097833	0	0	0	0	0	0.015456	0	0.034776	0.0493185	4.81418	0.0282265	0.0463217	1.332	0	#NUM!
	ENSMUSG00000016524.12	Il19	0.022687	0.065979	0.047495	0	0	0	0	0	0	0.015129	0	0.0340403	0.0482923	4.80918	0.0283085	0.0288025	0.84613	0	#NUM!
	ENSMUSG00000028520.12	4921539E11Rik	0	0.075214	0.020767	0.031676	0	0	0	0	0	0.0141841	0	0.0319142	0.0453231	8.65091	0.00326899	0.031716	0.993787	0	#NUM!
	ENSMUSG00000098209.2	Gm8245	0.081933	0.039732	0	0	0	0	0	0	0	0.0135183	0	0.0304162	0.0432273	4.9068	0.0267511	0.0391197	1.28615	0	#NUM!
	ENSMUSG00000046082.4	Tmem174	0.079648	0.014459	0.029693	0.034829	0	0	0.048178	0	0	0.0229786	0.0096356	0.0396572	0.0422733	6.04403	0.0139534	0.0280286	0.706772	0.0215459	2.23607
	ENSMUSG00000023443.13	Esx1	0.044417	0	0.02205	0.051538	0	0	0	0	0	0.0131117	0	0.0295012	0.0419456	6.99007	0.00819633	0.0233377	0.791074	0	#NUM!
	ENSMUSG00000082962.3	Gm10601	0.021877	0.053003	0.041895	0	0	0	0	0	0	0.012975	0	0.0291938	0.0415146	5.92506	0.0149271	0.0233382	0.799424	0	#NUM!
	ENSMUSG00000037737.6	Actrt3	0	0	0.034761	0.081358	0	0	0	0	0	0.0129021	0	0.0290297	0.0412847	6.85366	0.008846	0.0385424	1.32769	0	#NUM!
	ENSMUSG00000023802.4	Nox3	0	0.075239	0.038587	0	0	0	0	0	0	0.0126473	0	0.0284565	0.0404808	6.77135	0.00926329	0.0361053	1.26879	0	#NUM!
	ENSMUSG00000020904.11	Cfap52	0.105481	0.118836	0.077778	0.035718	0	0	0.256242	0	0.021795	0.0684278	0.0556074	0.0844532	0.0388945	4.59129	0.0321348	0.0367152	0.43474	0.112555	2.02409
	ENSMUSG00000071104.10	Ccdc110	0.053321	0.144206	0.012347	0.01447	0	0.091247	0.040076	0	0.008824	0.040499	0.0280294	0.056086	0.0388458	3.95652	0.04669	0.0616922	1.09996	0.0389927	1.39114
	ENSMUSG00000115554.1	AC107232.1	0	0.069586	0	0.02776	0	0	0	0	0	0.0108162	0	0.0243365	0.0346897	4.78017	0.0287893	0.0328825	1.35116	0	#NUM!
	ENSMUSG00000110970.2	Olfr156	0	0.068821	0	0.026574	0	0	0	0	0	0.0105994	0	0.0238487	0.0340026	4.78017	0.0287893	0.0324934	1.36248	0	#NUM!
	ENSMUSG00000062564.12	Tex28	0.034204	0	0	0.059436	0	0	0	0	0	0.0104044	0	0.02341	0.0333842	4.89309	0.0269643	0.0289277	1.2357	0	#NUM!
	ENSMUSG00000079606.1	Gm595	0.042607	0.03094	0.015881	0	0	0	0	0	0	0.00993644	0	0.022357	0.0318991	7.95794	0.00478768	0.0184888	0.826979	0	#NUM!
	ENSMUSG00000031179.14	3830417A13Rik	0.042848	0.041502	0	0	0	0	0	0	0	0.00937222	0	0.0210875	0.0301065	5.95465	0.0146786	0.0243559	1.15499	0	#NUM!
	ENSMUSG00000083679.1	Gm12892	0.047966	0	0.0358	0	0	0	0	0	0	0.00930733	0	0.0209415	0.0299002	4.00512	0.0453622	0.024686	1.17881	0	#NUM!
	ENSMUSG00000037440.8	Vnn1	0.073586	0.040071	0.064295	0	0	0.074449	0	0.042993	0	0.0328216	0.0234884	0.044488	0.0293012	5.69331	0.0170297	0.0328517	0.73844	0.0340313	1.44886
	ENSMUSG00000113942.1	Gm18632	0.010856	0.031534	0	0.037893	0	0	0	0	0	0.00892033	0	0.0200707	0.0286692	5.88489	0.0152714	0.0176709	0.880432	0	#NUM!
	ENSMUSG00000001773.14	Folh1	0.027683	0.051056	0.013112	0.015363	0	0	0.033531	0	0	0.0156383	0.0067062	0.0268035	0.0285174	4.03149	0.0446584	0.0173906	0.648818	0.0149955	2.23607
	ENSMUSG00000047161.12	Chst9	0.035547	0.021195	0	0.020665	0	0	0	0	0	0.00860078	0	0.0193518	0.027652	5.97429	0.0145159	0.0146276	0.755879	0	#NUM!
	ENSMUSG00000044117.12	2900011O08Rik	0.009293	0.02699	0	0.032473	0	0	0	0	0	0.00763956	0	0.017189	0.0245878	5.88489	0.0152714	0.0151379	0.880674	0	#NUM!
	ENSMUSG00000075024.2	Gm10803	0.026762	0.012954	0.026612	0	0	0	0	0	0	0.00736978	0	0.016582	0.0237266	6.94616	0.00839992	0.0128109	0.772579	0	#NUM!
	ENSMUSG00000092167.8	Gm3696	0	0.06034	0.408083	0.35608	0.062994	0.247449	0.322619	0.079267	0.220661	0.195277	0.186598	0.206126	0.0235491	8.11737	0.0043843	0.205762	0.998237	0.111985	0.600141
	ENSMUSG00000089991.2	Gm16332	0.044962	0.010683	0.010993	0	0.0074	0	0	0	0	0.00822644	0.00148	0.0166595	0.021703	4.7036	0.0300995	0.0195482	1.1734	0.00330938	2.23607
	ENSMUSG00000103458.1	Gm42416	0.040478	0	0	0.028725	0	0.013829	0	0	0	0.00922578	0.0027658	0.0173008	0.0207616	4.15211	0.0415826	0.0205453	1.18754	0.00618452	2.23607
	ENSMUSG00000043705.6	Capn13	0.04212	0	0	0.014727	0	0	0	0	0	0.00631633	0	0.0142118	0.0203589	7.09077	0.00774821	0.0198585	1.39733	0	#NUM!
	ENSMUSG00000031727.8	Pmfbp1	0	0.018357	0.037748	0	0	0	0	0	0	0.00623389	0	0.0140263	0.020095	6.76843	0.00927844	0.0180273	1.28525	0	#NUM!
	ENSMUSG00000020323.14	Prss57	0.007995	0	0.012931	0.029296	0	0	0	0	0	0.00558022	0	0.0125555	0.018001	5.01631	0.0251096	0.0123669	0.984982	0	#NUM!
	ENSMUSG00000115293.1	Ece2	0.021172	0	0	0.028629	0	0	0	0	0	0.00553344	0	0.0124502	0.017851	6.9627	0.00832265	0.0146951	1.18031	0	#NUM!
	ENSMUSG00000082629.3	Gm5639	0.018508	0	0.013802	0.016169	0	0	0	0	0	0.00538656	0	0.0121198	0.01738	4.87437	0.0272584	0.00830511	0.685254	0	#NUM!
	ENSMUSG00000092518.9	Fam71e2	0	0.035169	0.012046	0	0	0	0	0	0	0.00524611	0	0.0118038	0.0169295	4.76209	0.0290932	0.0165796	1.40461	0	#NUM!
	ENSMUSG00000041534.9	Rbp3	0	0.022857	0.011761	0	0	0	0	0	0	0.00384644	0	0.0086545	0.0124321	6.77135	0.00926329	0.0109721	1.26779	0	#NUM!
	ENSMUSG00000026560.13	Fmo9	0.021207	0.013078	0	0	0	0	0	0	0	0.00380944	0	0.00857125	0.012313	4.9068	0.0267511	0.0104388	1.21789	0	#NUM!
	ENSMUSG00000070841.4	Vmn2r34	0	0	0	0	0.011848	0.010124	0	0	0	0.00244133	0.0043944	0	-0.00632589	3.9085	0.0480424	0	#NUM!	0.00604807	1.37631
	ENSMUSG00000091455.4	Otogl	0	0	0	0	0.002344	0.011985	0.005657	0	0.004983	0.00277433	0.0049938	0	-0.0071866	8.13674	0.00433773	0	#NUM!	0.00450767	0.902653
	ENSMUSG00000029268.14	Ugt2a2	0	0	0	0	0.017412	0	0	0.008497	0	0.00287878	0.0051818	0	-0.00745645	3.95947	0.0466082	0	#NUM!	0.00776404	1.49833
	ENSMUSG00000116108.1	LT629148.9	0	0	0	0	0	0	0	0.012318	0.014056	0.00293044	0.0052748	0	-0.00758993	4.12308	0.0423019	0	#NUM!	0.00724891	1.37425
	ENSMUSG00000037974.16	Muc5ac	0	0	0	0.004352	0.004985	0	0.018047	0.007246	0.002649	0.00414211	0.0065854	0.001088	-0.00790078	5.55338	0.0184451	0.002176	2	0.00695034	1.05542
	ENSMUSG00000001901.15	Kcnh6	0	0	0	0	0.006394	0.013293	0	0	0.007836	0.00305811	0.0055046	0	-0.00791968	3.91932	0.0477343	0	#NUM!	0.0056455	1.0256
	ENSMUSG00000029286.12	Enam	0	0	0	0	0.010172	0.008687	0	0	0.012162	0.00344678	0.0062042	0	-0.00892312	7.339	0.00674745	0	#NUM!	0.00579628	0.934251
	ENSMUSG00000029368.10	Alb	0	0	0	0	0	0	0	0.021854	0.011907	0.00375122	0.0067522	0	-0.00970862	3.98726	0.0458454	0	#NUM!	0.00989208	1.46502
	ENSMUSG00000104240.1	Gm36858	0	0	0	0	0.018614	0.015946	0	0	0	0.00384	0.006912	0	-0.0099376	3.9085	0.0480424	0	#NUM!	0.00951153	1.37609
	ENSMUSG00000058659.6	Olfr58	0	0	0	0	0	0	0.021878	0.008827	0.009635	0.00448222	0.008068	0	-0.011593	3.90133	0.0482478	0	#NUM!	0.00899907	1.1154
	ENSMUSG00000020524.16	Gria1	0.003886	0	0.005804	0	0.007806	0	0	0.011365	0.037357	0.00735756	0.0113056	0.0024225	-0.0127283	7.06742	0.00784983	0.00290479	1.19909	0.0153831	1.36066
	ENSMUSG00000084989.3	Crocc2	0.002884	0.004186	0	0.010124	0.020294	0.004943	0.027995	0	0.01541	0.00953733	0.0137284	0.0042985	-0.013483	4.92053	0.0265393	0.00425938	0.9909	0.0113482	0.826619
	ENSMUSG00000051062.6	Fbll1	0	0	0	0	0.031763	0	0	0.015627	0	0.00526556	0.009478	0	-0.0136095	3.95948	0.0466082	0	#NUM!	0.0141768	1.49576
	ENSMUSG00000111015.1	Gm3126	0	0	0	0	0.032673	0	0	0.016083	0	0.00541733	0.0097512	0	-0.0139999	3.95948	0.0466082	0	#NUM!	0.0145839	1.4956
	ENSMUSG00000043760.16	Pkhd1	0	0	0	0.025101	0.001573	0.049403	0	0.029737	0.003343	0.0121286	0.0168112	0.00627525	-0.0150268	4.97771	0.025676	0.0125505	2	0.0219403	1.3051
	ENSMUSG00000078420.6	Olfr141	0	0	0	0	0.014848	0.025403	0.017953	0	0	0.00646711	0.0116408	0	-0.0166971	6.07616	0.0137019	0	#NUM!	0.0112976	0.970519
	ENSMUSG00000004654.6	Ghrhr	0	0	0	0	0	0	0.020827	0	0.039464	0.006699	0.0120582	0	-0.0172923	3.89594	0.048403	0	#NUM!	0.0177776	1.47432
	ENSMUSG00000094584.2	Ms4a18	0	0	0	0	0	0.028494	0	0.032573	0	0.00678522	0.0122134	0	-0.0175135	3.94115	0.0471185	0	#NUM!	0.016786	1.37439
	ENSMUSG00000073769.4	Olfr1331	0.013774	0.009692	0	0	0	0	0	0.020162	0.071226	0.0127616	0.0182776	0.0058665	-0.0176921	4.70756	0.0300302	0.00697602	1.18913	0.0308597	1.68839
	ENSMUSG00000109737.1	Gm39566	0	0	0	0	0	0.018626	0.026346	0.005301	0.011602	0.006875	0.012375	0	-0.0177438	8.11238	0.00439639	0	#NUM!	0.0104647	0.845636
	ENSMUSG00000022738.6	Gsc2	0	0	0	0	0.043117	0	0	0.021351	0	0.00716311	0.0128936	0	-0.0184826	3.95948	0.0466082	0	#NUM!	0.0192595	1.49373
	ENSMUSG00000081289.1	Gm14857	0	0.009841	0	0	0.006797	0	0.049306	0	0.021713	0.00973967	0.0155632	0.00246025	-0.018735	3.97985	0.0460476	0.0049205	2	0.0208427	1.33923
	ENSMUSG00000095134.2	Mid1-ps1	0	0	0	0	0	0	0	0.03143	0.03592	0.00748333	0.01347	0	-0.0193034	4.3303	0.0374397	0	#NUM!	0.0185127	1.37437
	ENSMUSG00000063684.9	Gm13910	0	0	0	0	0.034909	0	0	0.033507	0	0.00760178	0.0136832	0	-0.0196068	5.26491	0.0217595	0	#NUM!	0.018743	1.36979
	ENSMUSG00000114550.1	AC167192.1	0	0	0.000184	0	0	0.026007	0	0.04457	0.000113	0.00787489	0.014138	4.6e-05	-0.0201876	5.0535	0.0245763	9.2e-05	2	0.0203927	1.4424
	ENSMUSG00000078926.8	Cdc20b	0	0	0	0	0.031992	0	0.038809	0	0	0.00786678	0.0141602	0	-0.0202856	3.87457	0.0490228	0	#NUM!	0.0195389	1.37984
	ENSMUSG00000113275.1	Tubb2a-ps2	0	0	0	0	0	0.031507	0	0	0.039302	0.00786767	0.0141618	0	-0.0202878	3.94516	0.0470064	0	#NUM!	0.0195867	1.38307
	ENSMUSG00000109487.3	Olfr1298	0	0	0	0	0	0.026086	0	0.029805	0.01619	0.008009	0.0144162	0	-0.0206497	5.14178	0.0233566	0	#NUM!	0.0140695	0.975948
	ENSMUSG00000113941.1	Gm35755	0	0	0	0	0	0.037406	0.026401	0	0.011627	0.00838156	0.0150868	0	-0.0216031	4.97997	0.0256425	0	#NUM!	0.0165329	1.09585
	ENSMUSG00000109617.1	Gm7669	0	0	0.022191	0	0.044134	0	0	0.028912	0.031749	0.0141096	0.020959	0.00554775	-0.0219433	4.27433	0.0386922	0.0110955	2	0.0199707	0.952846
	ENSMUSG00000031085.16	Gm498	0	0	0	0	0	0	0.030732	0.049876	0	0.00895644	0.0161216	0	-0.0230731	5.10735	0.0238248	0	#NUM!	0.0230897	1.43222
	ENSMUSG00000032394.6	Igdcc3	0	0	0.010253	0	0.020652	0.023247	0.016644	0.006704	0.029318	0.0118687	0.019313	0.00256325	-0.0239039	7.20969	0.00725111	0.0051265	2	0.00841843	0.435894
	ENSMUSG00000048337.3	Npy4r	0.023554	0	0	0	0.029523	0.020181	0	0.051697	0.012569	0.0152804	0.022794	0.0058885	-0.0240452	5.6105	0.0178532	0.011777	2	0.0194397	0.852843
	ENSMUSG00000043972.7	Opn5	0	0.036848	0	0	0.025302	0	0	0.024804	0.080998	0.0186613	0.0262208	0.009212	-0.0241119	4.54192	0.0330744	0.018424	2	0.0330849	1.26178
	ENSMUSG00000115760.1	AC154532.1	0	0	0	0	0.055521	0	0	0	0.029796	0.00947967	0.0170634	0	-0.0244096	3.95394	0.0467618	0	#NUM!	0.0250728	1.46939
	ENSMUSG00000034871.2	Fam151a	0	0	0	0	0	0.048065	0	0	0.038721	0.00964289	0.0173572	0	-0.0248263	6.63279	0.0100118	0	#NUM!	0.0239958	1.38247
	ENSMUSG00000027606.12	Dnajc5b	0	0	0	0	0.029482	0	0	0.058938	0	0.00982444	0.017684	0	-0.0252897	3.97612	0.0461498	0	#NUM!	0.0263593	1.49058
	ENSMUSG00000052396.7	Mogat2	0.013051	0	0.019445	0	0.065069	0	0	0.038289	0.027777	0.0181812	0.026227	0.008124	-0.0256768	4.41123	0.0357032	0.0097372	1.19857	0.0275332	1.0498
	ENSMUSG00000028635.7	Edn2	0	0	0	0	0	0	0.039837	0	0.052631	0.0102742	0.0184936	0	-0.0264369	5.08731	0.0241015	0	#NUM!	0.0257242	1.39098
	ENSMUSG00000038115.16	Ano2	0	0.023581	0	0	0.016257	0.027828	0.058985	0	0.021726	0.0164863	0.0249592	0.00589525	-0.0270864	4.07906	0.0434179	0.0117905	2	0.0216514	0.867471
	ENSMUSG00000083890.1	Gm15703	0	0	0	0	0.062961	0	0	0	0.034238	0.0107999	0.0194398	0	-0.0277766	3.9685	0.046359	0	#NUM!	0.0284903	1.46557
	ENSMUSG00000109609.1	Gm4972	0	0	0	0	0	0.03535	0	0	0.064241	0.0110657	0.0199182	0	-0.0284534	5.20246	0.022555	0	#NUM!	0.0291241	1.46219
	ENSMUSG00000021587.5	Pcsk1	0	0.141416	0	0	0.016657	0.063963	0.123921	0.033535	0.044292	0.0470871	0.0564736	0.035354	-0.0291326	11.2692	0.00078802	0.070708	2	0.0414282	0.733585
	ENSMUSG00000050982.13	Apol10a	0	0	0	0	0.007163	0.036758	0.052132	0	0.007627	0.01152	0.020736	0	-0.0296098	8.88613	0.00287345	0	#NUM!	0.0225193	1.086
	ENSMUSG00000044757.7	Gm6430	0	0	0	0	0	0	0	0.070168	0.03712	0.0119209	0.0214576	0	-0.0306293	6.70873	0.00959421	0	#NUM!	0.03162	1.4736
	ENSMUSG00000074195.3	Clca4b	0	0.010518	0	0.025351	0	0.049656	0.035095	0.00707	0.06182	0.0210567	0.0307282	0.00896725	-0.0307846	5.46176	0.019437	0.0119952	1.33767	0.0266832	0.868361
	ENSMUSG00000053742.8	Gm5114	0.007115	0	0	0	0	0.036573	0.061678	0.020829	0	0.0140217	0.023816	0.00177875	-0.0313925	5.7007	0.0169581	0.0035575	2	0.0261706	1.09887
	ENSMUSG00000091844.1	Gm8251	0.010388	0.01005	0.02586	0.024297	0.080007	0.011867	0.025198	0.016874	0.06658	0.0301246	0.0401052	0.0176488	-0.0314898	7.15442	0.00747795	0.00860394	0.48751	0.0310338	0.773809
	ENSMUSG00000018634.10	Crhr1	0.036056	0.013089	0.268901	0.047256	0.036067	0.015445	0	0.325704	0.201774	0.104921	0.115798	0.0913255	-0.0319944	4.28038	0.0385546	0.119235	1.3056	0.142556	1.23108
	ENSMUSG00000072878.4	1700123L14Rik	0	0.01944	0	0	0.013313	0.045817	0.045997	0.032329	0	0.0174329	0.0274912	0.00486	-0.0321315	3.95487	0.0467359	0.00972	2	0.0203623	0.740684
	ENSMUSG00000115247.1	AC113125.1	0	0	0	0	0	0.022558	0.063765	0.012903	0.013964	0.0125767	0.022638	0	-0.0322955	6.09679	0.0135428	0	#NUM!	0.0243615	1.07613
	ENSMUSG00000068480.6	Gm7551	0	0	0	0	0	0	0	0.066513	0.04786	0.0127081	0.0228746	0	-0.0326293	5.93778	0.0148196	0	#NUM!	0.0320091	1.39933
	ENSMUSG00000090700.1	Cyp4f40	0	0.018182	0	0	0.024768	0	0.030005	0.085673	0	0.0176253	0.0280892	0.0045455	-0.0334225	6.6815	0.00974188	0.009091	2	0.0350307	1.24712
	ENSMUSG00000007946.11	Phox2a	0.014707	0.021368	0.20934	0	0.298817	0	0	0.057564	0.078205	0.0755557	0.0869172	0.0613537	-0.0343365	6.19939	0.0127794	0.0990606	1.61458	0.123438	1.42018
	ENSMUSG00000048933.8	Olfr722	0	0	0	0	0.029885	0.025711	0	0.070879	0	0.0140528	0.025295	0	-0.0360391	7.36487	0.00665103	0	#NUM!	0.0290638	1.14899
	ENSMUSG00000042459.8	Bpifa2	0	0	0	0	0	0	0.066439	0.072705	0	0.0154604	0.0278288	0	-0.0396	3.90674	0.0480927	0	#NUM!	0.0381705	1.37162
	ENSMUSG00000056856.12	Jakmip3	0	0.009394	0	0	0.026354	0.039535	0.047036	0.022573	0.017646	0.0180598	0.0306288	0.0023485	-0.0401406	6.22371	0.0126051	0.004697	2	0.0122499	0.399947
	ENSMUSG00000098006.1	Gm8565	0	0	0	0	0.051987	0.090212	0	0	0	0.0157999	0.0284398	0	-0.0404573	5.04731	0.0246642	0	#NUM!	0.0412212	1.44942
	ENSMUSG00000040490.4	Lrfn2	0.013479	0.019569	0	0.011796	0	0.034646	0.097965	0.032881	0.035951	0.0273652	0.0402886	0.011211	-0.0408998	4.5127	0.0336441	0.00818594	0.73017	0.0355502	0.882388
	ENSMUSG00000025916.10	Ppp1r42	0	0	0	0	0.074191	0	0	0.028681	0.044298	0.0163522	0.029434	0	-0.0418513	5.16376	0.0230629	0	#NUM!	0.031454	1.06863
	ENSMUSG00000054134.13	Umodl1	0.004503	0	0.040351	0	0.013562	0.028422	0	0.028295	0.137275	0.0280453	0.0415108	0.0112135	-0.0425902	12.1709	0.000485421	0.0195406	1.7426	0.0548202	1.32063
	ENSMUSG00000047109.12	Cldn14	0	0	0	0	0.045976	0.056797	0.047549	0	0	0.0167024	0.0300644	0	-0.0427345	4.96726	0.0258316	0	#NUM!	0.0277545	0.92317
	ENSMUSG00000115178.1	AC164879.1	0	0	0	0	0.051517	0.04469	0	0	0.055251	0.0168287	0.0302916	0	-0.0430527	6.24423	0.0124599	0	#NUM!	0.0279104	0.921391
	ENSMUSG00000025496.5	Drd4	0	0.046927	0.034958	0.013659	0.00782	0	0.037825	0.038118	0.192299	0.0412896	0.0552124	0.023886	-0.0434783	9.06539	0.00260493	0.0210445	0.881038	0.0785521	1.42273
	ENSMUSG00000042417.5	Ccno	0.026823	0	0	0	0.017888	0.042087	0.02969	0.034924	0.065375	0.0240874	0.0379928	0.00670575	-0.0441544	5.44913	0.0195781	0.0134115	2	0.0176713	0.465123
	ENSMUSG00000047641.8	Krt87	0.029483	0.07136	0.073277	0.017164	0.127718	0.097491	0.02378	0.0672	0.094249	0.066858	0.0820876	0.047821	-0.046425	3.91586	0.0478324	0.0287415	0.601023	0.0390151	0.475286
	ENSMUSG00000078897.10	Gm4724	0	0	0	0	0.100654	0	0	0.064744	0	0.0183776	0.0330796	0	-0.0469514	9.37125	0.00220416	0	#NUM!	0.0470418	1.42208
	ENSMUSG00000095779.1	Gm2163	0	0	0	0	0.008803	0.094725	0.038579	0	0.035933	0.0197822	0.035608	0	-0.050478	14.0121	0.000181642	0	#NUM!	0.0370479	1.04044
	ENSMUSG00000083917.1	Gm12093	0	0	0	0	0.034449	0	0.041809	0.016974	0.092061	0.0205881	0.0370586	0	-0.0524974	10.3176	0.00131767	0	#NUM!	0.034754	0.937813
	ENSMUSG00000047261.9	Gap43	0.017106	0	0	0	0.034009	0	0.041271	0.117705	0.018175	0.0253629	0.042232	0.0042765	-0.0535199	4.10843	0.0426701	0.008553	2	0.0450749	1.06732
	ENSMUSG00000009216.7	Fam163b	0.007347	0	0	0.025706	0.029434	0.062944	0.142352	0	0	0.0297537	0.046946	0.00826325	-0.0543147	5.65367	0.0174188	0.0121333	1.46835	0.0593143	1.26346
	ENSMUSG00000083710.1	Gm15078	0	0	0	0	0	0	0	0.112665	0.080218	0.0214314	0.0385766	0	-0.0546076	6.36247	0.0116559	0	#NUM!	0.0540545	1.40123
	ENSMUSG00000075119.2	Olfr1197	0	0	0.040813	0.079582	0	0.072335	0.184009	0.054433	0.044071	0.0528048	0.0709696	0.0300988	-0.0561349	3.90681	0.0480908	0.0381893	1.2688	0.0685811	0.966344
	ENSMUSG00000056293.12	Gsdmc2	0	0	0	0	0.015727	0	0.054643	0.042534	0.087214	0.0222353	0.0400236	0	-0.0566163	15.3693	8.84136e-05	0	#NUM!	0.0340557	0.850892
	ENSMUSG00000112862.1	Gm47094	0	0	0	0	0	0	0	0.132165	0.069099	0.0223627	0.0402528	0	-0.0569342	3.98726	0.0458454	0	#NUM!	0.0594576	1.4771
	ENSMUSG00000093714.1	Vmn2r-ps132	0	0	0	0	0.098523	0	0	0	0.106627	0.0227944	0.04103	0	-0.0580116	5.15695	0.0231535	0	#NUM!	0.0562557	1.37109
	ENSMUSG00000113117.1	Gm2544	0	0	0	0	0.117391	0	0.095771	0	0	0.0236847	0.0426324	0	-0.0602306	5.04797	0.0246548	0	#NUM!	0.0588751	1.38099
	ENSMUSG00000116423.1	AC166171.1	0	0	0	0	0.039104	0.138197	0	0.039525	0	0.0240918	0.0433652	0	-0.0612442	5.10915	0.0237999	0	#NUM!	0.0565399	1.30381
	ENSMUSG00000005952.15	Trpv1	0.02804	0.035886	0.042658	0.072021	0.066735	0.032674	0.237075	0.093128	0.027289	0.0706118	0.0913802	0.0446513	-0.0631324	3.99581	0.0456135	0.0191993	0.429984	0.0857198	0.938056
	ENSMUSG00000113354.1	Gm20789	0.035267	0.014626	0.007523	0.026486	0.015166	0.043168	0.207637	0	0.080681	0.0478393	0.0693304	0.0209755	-0.0667594	4.13497	0.0420058	0.0123275	0.587707	0.0831903	1.19991
	ENSMUSG00000113567.1	Gm32300	0	0	0	0	0	0	0	0.156163	0.080949	0.0263458	0.0474224	0	-0.0668434	3.98726	0.0458454	0	#NUM!	0.0701698	1.47968
	ENSMUSG00000039518.7	Cdsn	0.057406	0.059538	0.073409	0	0.270884	0.042157	0	0.08807	0.087443	0.0754341	0.0977108	0.0475882	-0.0674262	6.19427	0.0128165	0.0325092	0.683134	0.103466	1.0589
	ENSMUSG00000026241.5	Nppc	0	0.07386	0.03771	0	0	0.086977	0.061058	0	0.242007	0.0557347	0.0780084	0.0278925	-0.068679	4.07173	0.0436066	0.0354278	1.27015	0.0992899	1.27281
	ENSMUSG00000038295.14	Atg9b	0.201256	0.420253	0.433456	0.30697	0.554995	0.237062	0.334428	0.664156	0.240998	0.377064	0.406328	0.340484	-0.0691792	5.04502	0.0246969	0.108803	0.319555	0.193476	0.476157
	ENSMUSG00000046623.8	Gjb4	0	0	0.024925	0	0.049937	0	0	0.196714	0.035579	0.0341283	0.056446	0.00623125	-0.0702571	11.8669	0.000571401	0.0124625	2	0.0814328	1.44267
	ENSMUSG00000056008.1	Gm11541	0	0	0.020796	0	0.013912	0.095675	0.168626	0	0	0.0332232	0.0556426	0.005199	-0.0706403	5.85782	0.015508	0.010398	2	0.0746684	1.34193
	ENSMUSG00000094928.1	1700122O11Rik	0	0	0	0	0.038013	0.133144	0	0	0.081923	0.02812	0.050616	0	-0.0712355	6.19703	0.0127965	0	#NUM!	0.0571703	1.12949
	ENSMUSG00000066272.5	Olfr559	0	0	0	0	0.060771	0	0.125295	0.051204	0.016228	0.0281664	0.0506996	0	-0.0713503	10.152	0.00144141	0	#NUM!	0.048541	0.957423
	ENSMUSG00000040258.6	Nxph4	0	0	0	0	0.01397	0.02402	0.13547	0.054863	0.029829	0.0286836	0.0516304	0	-0.0726278	12.5464	0.000396967	0	#NUM!	0.0492328	0.953562
	ENSMUSG00000116209.1	LT629152.6	0	0	0	0	0	0.098671	0.096457	0	0.063699	0.0287586	0.0517654	0	-0.0728129	6.82382	0.00899501	0	#NUM!	0.0492423	0.951258
	ENSMUSG00000083631.2	Gm13366	0	0	0	0	0	0.095792	0.13436	0	0.029588	0.02886	0.051948	0	-0.0730634	6.00164	0.0142926	0	#NUM!	0.0604384	1.16344
	ENSMUSG00000094530.2	Gm21399	0	0	0	0	0.057053	0	0.144363	0.058941	0	0.0289286	0.0520714	0	-0.0732326	3.93631	0.0472543	0	#NUM!	0.0591874	1.13666
	ENSMUSG00000039539.13	Sgcz	0.018737	0.04065	0.013934	0.016309	0.009519	0.143647	0.15992	0.036402	0.030244	0.0521513	0.0759464	0.0224075	-0.0736359	4.29572	0.0382083	0.0123187	0.549759	0.0701784	0.924051
	ENSMUSG00000059195.10	Gm12715	0	0	0	0.17808	0.092486	0	0.215898	0.087985	0.10709	0.0757266	0.100692	0.04452	-0.0755704	4.21146	0.0401517	0.08904	2	0.0769432	0.764146
	ENSMUSG00000094083.1	Gm1604a	0	0.055536	0	0	0.037303	0.081514	0	0.075256	0.151843	0.0446058	0.0691832	0.013884	-0.0766165	5.07564	0.0242643	0.027768	2	0.0566221	0.818437
	ENSMUSG00000081539.1	Gm11990	0	0	0	0	0.183955	0	0	0.092062	0	0.0306686	0.0552034	0	-0.0775211	10.3949	0.00126366	0	#NUM!	0.0822766	1.49043
	ENSMUSG00000111177.1	Rps2-ps3	0	0	0	0	0	0	0.166395	0	0.109932	0.030703	0.0552654	0	-0.0776059	6.12173	0.013353	0	#NUM!	0.078264	1.41615
	ENSMUSG00000078869.2	Gm14409	0	0	0	0	0.049659	0	0.12089	0.074054	0.038144	0.0314163	0.0565494	0	-0.0793602	9.66055	0.00188267	0	#NUM!	0.0448057	0.792328
	ENSMUSG00000050063.18	Klk6	0.380415	0.420126	0.078128	0	0.350146	0	0	0.96479	0.130129	0.258193	0.289013	0.219667	-0.0797792	4.28818	0.0383782	0.21159	0.963228	0.403953	1.3977
	ENSMUSG00000111612.1	Gm47090	0	0	0	0	0.187351	0	0	0.047779	0.050642	0.0317524	0.0571544	0	-0.0801861	7.383	0.00658433	0	#NUM!	0.0768354	1.34435
	ENSMUSG00000031163.2	Glod5	0	0	0	0	0.093456	0.082392	0.114701	0	0	0.0322832	0.0581098	0	-0.0814893	5.00735	0.0252399	0	#NUM!	0.0543025	0.934481
	ENSMUSG00000110309.1	Gm7419	0	0	0	0	0	0.153422	0.143361	0	0	0.0329759	0.0593566	0	-0.0831883	5.94298	0.0147761	0	#NUM!	0.0813552	1.37062
	ENSMUSG00000039097.5	Rln1	0	0	0	0	0.039992	0.021758	0.195827	0	0.043127	0.0334116	0.0601408	0	-0.0842559	8.08607	0.00446069	0	#NUM!	0.0777759	1.29323
	ENSMUSG00000114397.1	Gm7621	0	0	0	0	0	0.112895	0	0	0.196444	0.034371	0.0618678	0	-0.0866042	9.47238	0.00208588	0	#NUM!	0.0897182	1.45016
	ENSMUSG00000051769.2	Wfdc15a	0	0	0	0	0.082326	0.149259	0	0.087596	0	0.0354646	0.0638362	0	-0.089276	3.92477	0.0475798	0	#NUM!	0.0639406	1.00163
	ENSMUSG00000083627.1	Gm12502	0	0	0	0	0	0	0	0.219502	0.110794	0.0366996	0.0660592	0	-0.0922876	4.00392	0.0453946	0	#NUM!	0.0982819	1.48779
	ENSMUSG00000033342.13	Plppr5	0	0.035667	0	0.017225	0	0.261255	0.141704	0	0	0.0506501	0.0805918	0.013223	-0.0928699	9.66541	0.0018777	0.0170239	1.28745	0.118173	1.46631
	ENSMUSG00000105666.1	Gm18711	0	0	0	0	0	0.138858	0.193856	0	0	0.0369682	0.0665428	0	-0.0929419	4.88917	0.0270257	0	#NUM!	0.0931692	1.40014
	ENSMUSG00000053173.12	Rpl18-ps2	0	0	0	0	0	0.112584	0.15501	0.065423	0	0.0370019	0.0666034	0	-0.0930238	3.90319	0.0481944	0	#NUM!	0.0685627	1.02942
	ENSMUSG00000036938.17	Try5	0	0	0	0	0.073238	0.064061	0	0	0.19719	0.0371654	0.0668978	0	-0.093422	9.39603	0.00217456	0	#NUM!	0.0805837	1.20458
	ENSMUSG00000026424.8	Gpr37l1	0.019743	0.028672	0.014721	0	0.039473	0.033829	0.310516	0.019287	0.021038	0.0541421	0.0848286	0.015784	-0.0948735	5.55234	0.018456	0.0120005	0.760298	0.126449	1.49065
	ENSMUSG00000038624.13	Nepn	0.08766	0.054573	0.059632	0.109151	0.162404	0.138035	0.181612	0.079633	0.199948	0.119183	0.152326	0.077754	-0.0965215	4.41064	0.0357154	0.0254929	0.327866	0.0466787	0.306439
	ENSMUSG00000068452.7	Duox2	0.123334	0.083938	0.057195	0.088767	0.116697	0.059514	0.314073	0.10971	0.223669	0.130766	0.164733	0.0883085	-0.0979112	4.71741	0.0298586	0.0271671	0.307638	0.102691	0.623381
	ENSMUSG00000098404.1	Mrip-ps	0	0.377001	0	0	0.567843	0	0	0.291842	0	0.13741	0.171937	0.0942502	-0.0989523	5.82945	0.0157601	0.1885	2	0.254856	1.48226
	ENSMUSG00000007107.6	Atp1a4	0.006177	0.035866	0.00922	0	0.006192	0	0.089802	0.319274	0.013182	0.0533014	0.08569	0.0128158	-0.10024	3.90813	0.048053	0.0158383	1.23585	0.135553	1.5819
	ENSMUSG00000035020.11	Epgn	0.079349	0.159242	0.09852	0.023043	0.357056	0.067974	0	0.077605	0.346149	0.134326	0.169757	0.0900385	-0.10183	5.55221	0.0184573	0.0561656	0.623795	0.168719	0.993886
	ENSMUSG00000022126.6	Acod1	0.033568	0.036556	0.075114	0.058684	0.008399	0.115036	0.081269	0.352316	0.089473	0.0944906	0.129299	0.0509805	-0.103691	8.49666	0.00355799	0.0196047	0.384553	0.130815	1.01172
	ENSMUSG00000085812.1	Gm15843	0	0	0	0	0.070596	0.12706	0.175371	0	0	0.0414474	0.0746054	0	-0.103807	3.85393	0.0496295	0	#NUM!	0.0775455	1.03941
	ENSMUSG00000050762.5	Prss27	0.019987	0.058111	0.029727	0.034663	0.039649	0.102715	0.289007	0.078379	0.063638	0.0795418	0.114678	0.035622	-0.106129	4.13801	0.0419303	0.0161852	0.454359	0.100107	0.872944
	ENSMUSG00000100025.1	Gm8141	0.027123	0	0.060608	0.094495	0.12166	0.116158	0.262139	0.053064	0.086574	0.0913134	0.127919	0.0455565	-0.109392	5.30286	0.0212905	0.0409744	0.89942	0.0798517	0.624237
	ENSMUSG00000029123.8	Stk32b	0.031394	0.044335	0.089631	0.026067	0.026699	0.148819	0.377642	0.0439	0.062074	0.0945068	0.131827	0.0478568	-0.111212	3.89858	0.048327	0.0288866	0.603605	0.145226	1.10164
	ENSMUSG00000027524.9	Edn3	0.01388	0	0.025094	0	0	0.13958	0.296653	0	0.017914	0.0547912	0.0908294	0.0097435	-0.111437	8.66644	0.00324124	0.0121466	1.24664	0.128993	1.42017
	ENSMUSG00000091091.2	Kcnmb3	0.027269	0.039615	0.060935	0.094997	0.095128	0.35039	0.098822	0.093355	0.072532	0.103671	0.142045	0.055704	-0.113415	5.33727	0.0208742	0.0296575	0.532413	0.116919	0.823107
	ENSMUSG00000042265.13	Trem1	0.109214	0.179722	0.217431	0.165944	0.109444	0.24906	0.299902	0.602251	0.069907	0.222542	0.266113	0.168078	-0.11627	3.8555	0.0495831	0.0448733	0.266979	0.210632	0.791514
	ENSMUSG00000111958.1	Gm47844	0.017845	0	0	0.030994	0	0	0.344342	0.017482	0.132688	0.0603723	0.0989024	0.0122098	-0.118555	7.31347	0.00684397	0.015086	1.23557	0.147965	1.49607
	ENSMUSG00000114353.1	Gm7896	0	0	0	0	0.182664	0	0.256065	0	0	0.0487477	0.0877458	0	-0.121341	4.01347	0.0451382	0	#NUM!	0.122922	1.40088
	ENSMUSG00000116461.1	AC137513.1	0.081961	0	0.204841	0	0.223996	0.171124	0.296759	0.105277	0.040498	0.12494	0.167531	0.0717005	-0.123559	4.81955	0.0281387	0.0968049	1.35013	0.0998925	0.596263
	ENSMUSG00000051067.8	Lingo3	0.081079	0.018108	0	0.01092	0	0.074812	0.45338	0.006085	0.086519	0.0812114	0.124159	0.0275267	-0.12967	4.00168	0.0454549	0.0364695	1.32487	0.188146	1.51536
	ENSMUSG00000084407.1	Gm14018	0.025562	0	0	0	0.227677	0	0	0	0.280778	0.0593352	0.101691	0.0063905	-0.130529	4.77603	0.0288585	0.012781	2	0.140506	1.3817
	ENSMUSG00000028736.13	Pax7	0.067706	0.019672	0	0	0	0.208798	0.340252	0	0.047743	0.076019	0.119359	0.0218445	-0.131497	9.68706	0.0018557	0.0319498	1.4626	0.150345	1.25961
	ENSMUSG00000115484.1	CT010453.2	0	0	0	0	0	0	0.209308	0.089613	0.184335	0.0536951	0.0966512	0	-0.133105	5.09398	0.0240091	0	#NUM!	0.0988843	1.02311
	ENSMUSG00000090051.1	Gm8194	0	0	0	0	0	0.170346	0.317958	0	0	0.054256	0.0976608	0	-0.134432	7.79747	0.00523193	0	#NUM!	0.14355	1.46989
	ENSMUSG00000028976.10	Slc2a5	0.161214	0.019866	0	0.011974	0.171951	0.023448	0	0.059233	0.505241	0.105881	0.151975	0.0482635	-0.136107	6.5396	0.0105499	0.0757419	1.56934	0.208214	1.37006
	ENSMUSG00000096366.1	Gm13240	0	0	0	4e-06	0.252416	0.230202	0	0.000289	0.034723	0.0575149	0.103526	1e-06	-0.142119	7.87752	0.00500532	2e-06	2	0.126811	1.22492
	ENSMUSG00000048480.5	Cxcr1	0	0	0	0	0	0.196554	0.276214	0.045046	0	0.0575349	0.103563	0	-0.142169	12.0802	0.00050961	0	#NUM!	0.125828	1.21499
	ENSMUSG00000000204.16	Slfn4	0.16766	0.342152	0.54941	0.60139	0.225	0.191422	0.413603	1.52165	0.457988	0.496697	0.561933	0.415153	-0.142374	6.91707	0.00853769	0.199408	0.480325	0.548786	0.976605
	ENSMUSG00000007682.6	Dio2	0.30689	0.626661	0.820853	0.281682	1.27617	0.250727	0.276995	0.573892	0.956798	0.596741	0.666916	0.509022	-0.143568	4.06943	0.043666	0.260524	0.511813	0.444164	0.665997
	ENSMUSG00000094628.7	Gm3252	0	0	0.123745	0.032205	0.083553	0.509394	0.051604	0.088419	0.023552	0.101386	0.151304	0.0389875	-0.148091	8.90821	0.00283892	0.0585089	1.50071	0.201887	1.33431
	ENSMUSG00000109516.1	Gm6882	0.058349	0	0	0	0.048338	0	0.341484	0	0.251891	0.0777847	0.128343	0.0145872	-0.153312	11.3356	0.00076036	0.0291745	2	0.158144	1.2322
	ENSMUSG00000049160.15	Tex50	0	0.083259	0	0	0.084575	0.147004	0.206141	0.196958	0.060528	0.0864961	0.139041	0.0208147	-0.158099	9.05803	0.00261543	0.0416295	2	0.0652898	0.469572
	ENSMUSG00000075574.2	Defb48	0.107389	0	0	0	0.2999	0	0	0	0.440904	0.0942437	0.148161	0.0268472	-0.161103	4.17548	0.0410129	0.0536945	2	0.208913	1.41004
	ENSMUSG00000083487.1	Gm13888	0	0	0	0	0	0.208861	0.283506	0	0.124895	0.0685847	0.123452	0	-0.167939	3.85161	0.0496983	0	#NUM!	0.125892	1.01976
	ENSMUSG00000081101.1	Gm12024	0	0.029055	0.059453	0.311964	0.13877	0.239669	0.674349	0.117569	0.063638	0.181607	0.246799	0.100118	-0.180571	4.36813	0.0366172	0.143301	1.43133	0.24737	1.00232
	ENSMUSG00000022347.8	A1bg	0.307197	0.11899	0	0.022149	0	0.253485	0.330793	0.116799	0.605218	0.194959	0.261259	0.112084	-0.181599	4.01358	0.0451353	0.139962	1.24872	0.230395	0.881866
	ENSMUSG00000053141.16	Ptprt	0.051707	0.076517	0.106571	0.263191	0.110274	0.099985	0.160064	0.225007	0.786426	0.20886	0.276351	0.124496	-0.182746	5.51482	0.018856	0.0951452	0.76424	0.289405	1.04724
	ENSMUSG00000002240.12	Prr27	0.018847	0.219155	0.028039	0	0.130967	0	0	0.369385	0.580323	0.149635	0.216135	0.0665103	-0.189406	12.1108	0.00050131	0.10243	1.54007	0.253378	1.17231
	ENSMUSG00000084133.1	Gm12856	0.26897	0.139633	0.203044	0.166682	0.057201	0.599776	0	0.207128	0.977391	0.291092	0.368299	0.194582	-0.195878	4.65415	0.0309786	0.0559851	0.287719	0.413212	1.12195
	ENSMUSG00000106964.5	FO907130.1	0	0.048364	0	0	0.140194	0	0.239764	0.149977	0.282915	0.0956904	0.16257	0.012091	-0.199979	9.08486	0.00257734	0.024182	2	0.109007	0.670523
	ENSMUSG00000029372.7	Ppbp	0.53071	0.175413	0.824306	0.125149	0.310058	0.165278	0.522362	2.01318	0.178923	0.538375	0.63796	0.413894	-0.212226	4.09087	0.0431154	0.327786	0.791955	0.782026	1.22582
	ENSMUSG00000038057.4	Dbil5	0.061949	0.271297	0.091152	0.104434	0.416733	0.424125	0.146867	0.184967	0.388072	0.232177	0.312153	0.132208	-0.212797	4.76433	0.0290554	0.0944088	0.714093	0.134846	0.431988
	ENSMUSG00000107653.1	Gm31520	0	0	0	0	0	0.406372	0.396109	0	0	0.0891646	0.160496	0	-0.214742	11.8702	0.0005704	0	#NUM!	0.219798	1.36949
	ENSMUSG00000029379.10	Cxcl3	0.045192	0.18397	0.048773	0.182387	0	0.066296	0.206522	1.15626	0.041536	0.214548	0.294123	0.115081	-0.214827	4.06665	0.043738	0.078649	0.683426	0.488152	1.65969
	ENSMUSG00000030144.4	Clec4d	0.391613	0.081408	0.696906	0.555412	0.185358	0.259195	1.04803	1.67599	0.138768	0.559187	0.661468	0.431335	-0.215098	5.89391	0.0151933	0.264544	0.613314	0.678308	1.02546
	ENSMUSG00000111194.1	Gm47180	0.036653	0	0.035243	0	0	0.680656	0.134939	0.056433	0.050272	0.110466	0.18446	0.017974	-0.218529	4.57473	0.0324468	0.0207626	1.15514	0.281552	1.52636
	ENSMUSG00000110404.1	Rnf223	0.164741	0.173952	0.223471	0.157193	0.434964	0.115482	0.072543	0.555463	0.686852	0.287185	0.373061	0.179839	-0.218805	8.47579	0.00359904	0.0298842	0.166172	0.270289	0.724518
	ENSMUSG00000091060.2	7420461P10Rik	0	0.101953	0	0	0.266724	0	0.659844	0.04899	0	0.119723	0.195112	0.0254883	-0.220834	5.42458	0.0198552	0.0509765	2	0.28222	1.44646
	ENSMUSG00000045246.11	Kcng4	0.027955	0.056813	0.025041	0.088143	0	0.172457	0.920391	0	0.02615	0.146328	0.2238	0.049488	-0.221682	5.35466	0.0206669	0.0294912	0.595926	0.395952	1.76923
	ENSMUSG00000099685.6	Gm29617	0	7.6e-05	0.187344	0	0	0.522996	0.512656	0.07783	0	0.144545	0.222696	0.046855	-0.224005	5.92204	0.0149526	0.0936593	1.99892	0.271307	1.21828
	ENSMUSG00000100602.1	Gm19498	0	0	0	0	0.434979	0.405434	0	0	0	0.0933792	0.168083	0	-0.224142	3.9085	0.0480424	0	#NUM!	0.230393	1.37072
	ENSMUSG00000105123.1	Ighv1-79	0	0	0	0	0.380549	0	0.463647	0	0	0.0937996	0.168839	0	-0.225076	3.95055	0.046856	0	#NUM!	0.233052	1.38032
	ENSMUSG00000110679.1	Rpl10-ps5	0	0	0.169643	0	0.246221	0.468394	0.288112	0	0.125415	0.144198	0.225628	0.0424107	-0.233598	6.52599	0.0106309	0.0848215	2	0.17622	0.78102
	ENSMUSG00000031376.15	Atp2b3	0.019766	0.02136	0.036891	0.034902	0.005114	0.125049	0.840884	0.004496	0.069882	0.128705	0.209085	0.0282298	-0.233753	10.3029	0.00132824	0.00891375	0.315757	0.356746	1.70622
	ENSMUSG00000111942.1	Gm5182	0.281613	0.254443	0.222532	0.021529	0.276741	0.140739	0.060052	0.680298	0.911806	0.316639	0.413927	0.195029	-0.242662	8.04519	0.00456246	0.11816	0.605859	0.366577	0.885609
	ENSMUSG00000080303.2	Gm12419	0.055371	0	0.078041	0.089673	0.204695	0.362175	0.631227	0.052463	0	0.163738	0.250112	0.0557713	-0.24376	4.4185	0.0355514	0.0398157	0.71391	0.255681	1.02227
	ENSMUSG00000115171.1	AC135637.1	0	0	0	0	0	0.32644	0.426547	0	0.172582	0.102841	0.185114	0	-0.245026	3.88873	0.0486112	0	#NUM!	0.191673	1.03543
	ENSMUSG00000025425.17	St8sia5	0.114718	0.018226	0.018697	0	0	0.107483	0.928562	0	0.134377	0.146896	0.234084	0.0379102	-0.249759	5.42924	0.0198023	0.0519398	1.37007	0.39302	1.67897
	ENSMUSG00000092253.1	H2-Q3	0.11427	0.083365	0	0	0.110205	0.491724	0.407097	0.056764	0.179298	0.160303	0.249018	0.0494088	-0.251217	4.59936	0.031984	0.0584308	1.1826	0.190386	0.764547
	ENSMUSG00000038994.6	Hils1	0.065767	0.095729	0	0	0.064591	0.112622	0.788388	0	0.243067	0.15224	0.241734	0.040374	-0.255253	6.18192	0.0129062	0.0481979	1.19378	0.318323	1.31683
	ENSMUSG00000095681.7	Gm8281	0.050444	0.084172	0.0858	0.102246	0.308948	0.354885	0.13574	0.327474	0.335715	0.19838	0.292552	0.0806655	-0.258303	5.64649	0.0174903	0.0217387	0.269492	0.0892004	0.304904
	ENSMUSG00000099458.1	Gm19123	0	0.148272	0	0	0	0.261096	0.847278	0	0.106627	0.151475	0.243	0.037068	-0.261316	4.91405	0.0266391	0.074136	2	0.354322	1.45811
	ENSMUSG00000028023.16	Pitx2	0.43118	0.114272	0	0	0	0.126253	1.40962	0	0.286697	0.263114	0.364514	0.136363	-0.263963	7.73124	0.00542734	0.203793	1.49449	0.595989	1.63502
	ENSMUSG00000031962.6	Cdh15	0.125952	0.019248	0.029681	0	0	0.159031	0.947571	0.006468	0.1556	0.160395	0.253734	0.0437203	-0.264496	6.27395	0.0122525	0.0561828	1.28505	0.395452	1.55853
	ENSMUSG00000081933.1	Gm14767	0.24399	0.535405	0.26988	0.103113	0.821239	0.418798	0.289325	0.667561	0.579514	0.436536	0.555287	0.288097	-0.27194	4.8421	0.027773	0.180423	0.626259	0.208139	0.374832
	ENSMUSG00000006403.13	Adamts4	1.15903	1.33627	2.38137	1.16102	4.73399	0.594483	0.980304	2.36411	1.51028	1.80232	2.03663	1.50942	-0.275117	4.32416	0.037575	0.587206	0.389027	1.6474	0.808882
	ENSMUSG00000059408.2	Mrgprh	0.128061	0.074412	0.057246	0.044639	0.05109	0.197468	1.08324	0.075136	0.109038	0.202259	0.303194	0.0760895	-0.276254	4.65733	0.0309213	0.0367336	0.482768	0.439577	1.44982
	ENSMUSG00000026065.8	Slc9a4	0.236213	0.342046	0.392724	0.699673	0.594144	0.119302	0.448212	0.323831	2.12693	0.587008	0.722484	0.417664	-0.280975	7.3439	0.00672906	0.198992	0.476441	0.804195	1.1131
	ENSMUSG00000113084.1	A030003K21Rik	0	0	0	0.216717	0.073222	0.452183	0.899836	0	0	0.18244	0.285048	0.0541792	-0.285702	6.11845	0.0133778	0.108358	2	0.391559	1.37366
	ENSMUSG00000066771.2	Gm5614	0	0	0	0	0.490661	0	0.605045	0	0	0.121745	0.219141	0	-0.285865	3.87774	0.0489305	0	#NUM!	0.302784	1.38169
	ENSMUSG00000094322.2	Ighv9-4	0	0.299418	1.24622	6.02275	7.87192	0.274166	1.47619	1.28623	1.76946	2.24959	2.53559	1.8921	-0.289836	4.28416	0.038469	2.80453	1.48223	3.03565	1.19721
	ENSMUSG00000083725.1	Gm11865	0	0.048266	0.098299	0.170964	0	0.624601	0.874385	0	0.105032	0.213505	0.320804	0.0793823	-0.29121	5.14705	0.0232859	0.0730635	0.920401	0.403464	1.25767
	ENSMUSG00000062345.10	Serpinb2	0	0	0.017289	0	0.150535	0	0	0.768966	0.228054	0.129427	0.229511	0.00432225	-0.291862	35.9377	2.03732e-09	0.0086445	2	0.317254	1.38231
	ENSMUSG00000094132.7	Gm3264	0	0	0	0	0.075316	0.214432	0.634669	0	0.200429	0.124983	0.224969	0	-0.292745	12.5845	0.000388963	0	#NUM!	0.245751	1.09238
	ENSMUSG00000095280.1	Gm21738	0	0	0.624621	0.453952	0.533041	0.620258	0	0	1.668	0.433319	0.56426	0.269643	-0.301057	7.49	0.00620426	0.319058	1.18326	0.68175	1.20822
	ENSMUSG00000020169.4	Best3	0.129026	0.070253	0.180466	0.028202	0.12916	0.26254	0.917728	0.118086	0.404149	0.248846	0.366333	0.101987	-0.310202	7.59668	0.00584758	0.0666867	0.653876	0.329438	0.899286
	ENSMUSG00000113846.1	Gm6217	0	0	0	0	0	0.682817	0.301825	0	0.222562	0.134134	0.241441	0	-0.312015	18.3249	1.86256e-05	0	#NUM!	0.280804	1.16303
	ENSMUSG00000114940.1	Gm21378	0.001009	0.34146	0	0	0	0.785001	0.880723	0	0.079492	0.231965	0.349043	0.0856173	-0.313421	5.77253	0.0162785	0.170562	1.99215	0.444146	1.27247
	ENSMUSG00000042662.16	Dusp15	0.254666	0.264669	0.254119	0.025388	0.054533	0.526382	1.80699	0.028323	0.116995	0.370229	0.506645	0.199711	-0.328653	4.48662	0.0341612	0.116316	0.582424	0.754372	1.48896
	ENSMUSG00000070366.5	Plpp4	0.577879	0.172809	0.261423	0.599791	0.456065	0.651272	0	1.19967	1.5085	0.603045	0.763101	0.402975	-0.329626	5.08935	0.0240732	0.217824	0.540538	0.599023	0.784984
	ENSMUSG00000079428.8	Tceal7	0.027927	0	0	0	0	0.191314	0.939213	0	0.29547	0.161547	0.285199	0.00698175	-0.351955	15.8251	6.94735e-05	0.0139635	2	0.387082	1.35723
	ENSMUSG00000052688.12	Rab7b	7.43871	10.785	9.11014	8.11477	12.8433	5.84315	7.8895	15.2667	16.5349	10.4251	11.6755	8.86215	-0.362069	3.92022	0.0477086	1.45414	0.164085	4.64285	0.397657
	ENSMUSG00000110612.1	Gm17827	0	0.120219	0.244071	0.070512	0.241536	0.424367	1.42258	0	0.043428	0.28519	0.426382	0.108701	-0.363491	5.09549	0.0239881	0.102846	0.946143	0.58203	1.36504
	ENSMUSG00000096767.2	Ighv1-62-3	0.447873	0	0	0.243907	1.48082	1.1042	0	0	0	0.364089	0.517004	0.172945	-0.37109	4.21215	0.0401354	0.216365	1.25106	0.720351	1.39332
	ENSMUSG00000068614.7	Actc1	0.081789	0.142624	0.073055	0.113758	0.01627	0.112094	1.73702	0.112111	0.156469	0.282799	0.426793	0.102806	-0.371596	5.57914	0.0181756	0.0317923	0.309244	0.734227	1.72034
	ENSMUSG00000107011.1	Gm42906	0	0.873578	0	0.215497	0.47882	0.384473	0.421192	0.537462	1.43542	0.482938	0.651473	0.272269	-0.37635	5.74477	0.0165378	0.413544	1.51888	0.442069	0.678567
	ENSMUSG00000111279.2	Gm10519	0	0	0	0	0.259995	0.949988	0	0	0.290612	0.166733	0.300119	0	-0.378644	5.06035	0.0244792	0	#NUM!	0.388643	1.29496
	ENSMUSG00000103265.1	Gm2053	0.053588	0.156322	0.079021	0.272519	0.362711	0.825557	1.27443	0	0	0.336016	0.49254	0.140363	-0.388277	4.63511	0.0313241	0.0983406	0.700619	0.55324	1.12324
	ENSMUSG00000023829.8	Slc22a1	0.320282	0.116299	0.102304	0.03991	0.753433	0.019599	0.05532	0.614906	1.08385	0.3451	0.505422	0.144699	-0.3952	12.5473	0.000396782	0.121674	0.840881	0.460079	0.910288
	ENSMUSG00000027832.5	Ptx3	0.204055	0.330762	0.606308	0.423567	1.62739	0.145236	0.567928	1.46245	0.371526	0.637691	0.834906	0.391173	-0.399404	10.4333	0.00123766	0.169307	0.43282	0.667736	0.799774
	ENSMUSG00000025216.9	Lbx1	0.035667	0.038844	0.039901	0.077915	0	0.305573	1.53242	0	0.085544	0.235096	0.384707	0.0480817	-0.40183	11.3653	0.000748271	0.0199701	0.415335	0.653645	1.69907
	ENSMUSG00000021509.5	Slc25a48	1.4873	2.16785	1.0387	0.714934	4.27771	0.517364	0.643711	2.36065	2.74137	1.77218	2.10816	1.3522	-0.402053	5.23707	0.0221105	0.629266	0.465366	1.56899	0.744245
	ENSMUSG00000096519.1	Gm10721	0.354832	0.756741	1.17654	0.778389	1.64777	1.52902	1.65511	0.330505	1.52232	1.08347	1.33695	0.766625	-0.403628	4.09512	0.0430071	0.335579	0.437735	0.566131	0.423452
	ENSMUSG00000022512.2	Cldn1	4.04914	8.18157	5.00305	2.01007	14.136	2.83227	4.14915	5.67375	6.67848	5.85705	6.69393	4.81096	-0.404945	3.90612	0.0481105	2.57056	0.534313	4.4106	0.658896
	ENSMUSG00000038216.7	Pnmt	0.066613	0	0	0.115346	0	0.380343	1.49698	0	0.04709	0.234041	0.384883	0.0454898	-0.405585	8.67786	0.00322099	0.0561686	1.23475	0.641708	1.66728
	ENSMUSG00000052135.8	Foxo6	0.143148	0.061133	0.100492	0.088324	0.075842	0.331853	1.56973	0.065771	0.233418	0.296635	0.455323	0.0982742	-0.406101	7.17723	0.00738347	0.0341421	0.347417	0.63288	1.38996
	ENSMUSG00000107071.1	Gm42420	0.166442	0	0.17059	0.389631	0.497305	1.41015	0.533842	0	0.399083	0.396338	0.568076	0.181666	-0.408173	5.82041	0.0158413	0.159798	0.879628	0.516367	0.908975
	ENSMUSG00000095130.1	Ighv1-39	0	0.319752	0	0	1.3893	0.344147	0	0.258616	0.20489	0.279634	0.439391	0.079938	-0.41451	7.01138	0.00809934	0.159876	2	0.545924	1.24246
	ENSMUSG00000106372.1	Igkv14-126-1	0	0	0	0	0	0.716574	0.957306	0	0	0.185987	0.334776	0	-0.416598	4.88917	0.0270257	0	#NUM!	0.466245	1.39271
	ENSMUSG00000084382.1	Gm3267	0	0	0	0.308459	0	1.11793	1.0938	0	0	0.280021	0.442346	0.0771147	-0.421245	4.80332	0.028405	0.154229	2	0.605767	1.36944
	ENSMUSG00000026459.5	Myog	0.337385	0.093384	0	0	0	0.495431	1.55112	0.015729	0.375701	0.31875	0.487596	0.107692	-0.425426	4.54893	0.0329394	0.159331	1.4795	0.63326	1.29874
	ENSMUSG00000083608.1	Gm14863	0	0	0	0	0.818526	0	0	0.903128	0	0.191295	0.344331	0	-0.426888	7.41757	0.00645899	0	#NUM!	0.472442	1.37206
	ENSMUSG00000103880.1	Gm37009	0	0	0	0	0	0.577913	0.89558	0.267178	0	0.193408	0.348134	0	-0.430964	6.36194	0.0116594	0	#NUM!	0.387764	1.11384
	ENSMUSG00000021803.10	Cdhr1	7.75566	8.82642	8.23654	7.30374	8.12999	11.2547	1.34562	14.0763	21.4576	9.82073	11.2528	8.03059	-0.440224	4.12124	0.042348	0.65311	0.0813278	7.41644	0.659073
	ENSMUSG00000102524.1	Ighv1-2	0	0.394792	0.247971	0	2.27016	0	0	0.639378	0	0.3947	0.581908	0.160691	-0.446682	8.58324	0.00339271	0.194991	1.21345	0.983533	1.69019
	ENSMUSG00000027333.18	Smox	13.6417	13.4196	17.9598	10.957	25.8187	10.3596	15.2848	22.0132	23.9661	17.0467	19.4885	13.9945	-0.450377	3.93703	0.0472342	2.91004	0.207941	6.47114	0.332049
	ENSMUSG00000054905.2	Stfa3	0.78022	1.33562	0.56514	0	1.67237	0	0.300642	3.29778	1.19239	1.01602	1.29264	0.670245	-0.456948	5.958	0.0146507	0.552296	0.824022	1.3067	1.01088
	ENSMUSG00000040152.8	Thbs1	72.7327	65.6566	74.9738	23.753	97.1501	26.9404	5.90991	143.613	135.762	71.8324	81.8751	59.279	-0.459282	4.63179	0.0313848	24.0146	0.405111	62.724	0.766094
	ENSMUSG00000030732.13	Chrdl2	2.4776	2.80566	4.42297	4.46703	2.37789	1.37128	0.52623	6.13791	15.8979	4.49827	5.26224	3.54332	-0.462934	5.77878	0.0162208	1.04991	0.296307	6.32007	1.20102
	ENSMUSG00000082507.1	Gm9378	0	0.415586	0.275931	0.313891	0.354046	1.61208	0.894664	0.474202	0.291636	0.514671	0.725326	0.251352	-0.463381	5.27428	0.0216427	0.177638	0.70673	0.548636	0.7564
	ENSMUSG00000026147.16	Col9a1	0.690148	0.929162	0.369372	0.185938	0.518068	0.230638	0.040336	1.54153	3.45836	0.884839	1.15779	0.543655	-0.483202	11.5706	0.000670045	0.330863	0.608591	1.41045	1.21823
	ENSMUSG00000029909.6	Prss37	0.025165	0.402611	0.299012	0.043486	0.02486	3.29265	0	0	0.026653	0.45716	0.668833	0.192569	-0.484767	4.70787	0.0300248	0.187703	0.974735	1.46682	2.1931
	ENSMUSG00000058499.9	Pip	121.189	60.6309	85.0842	13.1773	94.2958	27.0424	0.143799	227.049	143.466	85.7865	98.3994	70.0203	-0.485005	4.04698	0.0442506	45.3301	0.647384	91.3024	0.927876
	ENSMUSG00000051456.4	Hspb3	0.1144	0.055536	0	0	0	0.065293	2.0984	0	0.160741	0.277152	0.464887	0.042484	-0.490764	7.91862	0.00489286	0.0546261	1.28581	0.915531	1.96936
	ENSMUSG00000076570.6	Igkv12-38	0	0	0.312453	0	0	0.710794	1.45929	0	0.423816	0.322928	0.51878	0.0781132	-0.494404	3.87491	0.0490128	0.156226	2	0.605952	1.16803
	ENSMUSG00000095866.1	Ighv2-4	0.011911	0.310224	0	0	0.190589	0.346907	0.969164	0.492528	0.619863	0.326798	0.52381	0.0805338	-0.495939	5.78791	0.0161367	0.15323	1.90268	0.296174	0.565422
	ENSMUSG00000058427.10	Cxcl2	0.924981	0.957445	1.41769	1.8706	0.951557	0.498062	0.792804	7.52582	1.43485	1.81931	2.24062	1.29268	-0.499235	8.11031	0.00440142	0.44617	0.345152	2.97393	1.32728
	ENSMUSG00000026255.15	Efhd1	2.31637	2.60303	3.1155	1.71385	7.60918	1.08737	1.05279	6.03698	3.55845	3.23261	3.86895	2.43719	-0.502383	5.08912	0.0240764	0.584644	0.239885	2.93488	0.758571
	ENSMUSG00000062611.4	Rps3a2	1.58675	1.59958	0.983905	0.545699	2.04757	1.16628	0.193931	2.63653	4.44552	1.68953	2.09797	1.17898	-0.507666	5.92419	0.0149344	0.510647	0.433124	1.60445	0.764763
	ENSMUSG00000021579.4	Lrrc14b	0.349789	0	0.01797	0.075622	0	0.020323	2.361	0.031626	0.490742	0.371897	0.580738	0.110845	-0.508941	5.82008	0.0158443	0.162529	1.46627	1.01615	1.74976
	ENSMUSG00000028003.6	Lrat	5.03997	9.08609	4.20308	1.48646	9.94066	2.9741	0.887739	8.32681	15.2507	6.35507	7.476	4.9539	-0.509549	5.16064	0.0231043	3.1448	0.634813	5.72094	0.765241
	ENSMUSG00000109222.1	Gm10297	0	0	0	0	0	0.436215	1.42109	0.091951	0.170021	0.235475	0.423855	0	-0.509803	18.215	1.97322e-05	0	#NUM!	0.580705	1.37006
	ENSMUSG00000010663.4	Fads1	12.1157	20.1821	19.2143	14.1098	18.8875	9.47177	6.26852	27.8462	56.9052	20.5557	23.8758	16.4055	-0.515204	5.24539	0.022005	3.90831	0.238232	20.3044	0.850418
	ENSMUSG00000038204.13	Asb10	0.326532	0.073814	0.046306	0.117696	0	0.174028	2.84779	0.082901	0.214717	0.431532	0.663887	0.141087	-0.544149	4.76292	0.0290792	0.127078	0.900703	1.22367	1.84318
	ENSMUSG00000033268.8	Duox1	2.18034	1.99394	1.36594	1.00674	2.4089	1.85902	0.345682	3.83962	5.82559	2.31397	2.85576	1.63674	-0.548261	5.9559	0.0146681	0.545688	0.333399	2.07855	0.727845
	ENSMUSG00000096146.2	Kcnj11	0.522872	0.78528	0.273876	0.929469	0.264367	0.905581	4.96736	0	0.930218	1.06434	1.41351	0.627874	-0.568141	5.28471	0.0215134	0.289871	0.461671	2.02731	1.43424
	ENSMUSG00000038370.6	Pcp4l1	0.316355	0.328329	0.246775	0.183503	0.194982	0.593605	2.61903	0.29486	0.720863	0.610922	0.884668	0.26874	-0.570913	5.962	0.0146175	0.0672454	0.250224	0.992862	1.1223
	ENSMUSG00000037469.9	Acp7	0	0.150515	0.086045	0.161118	2.74352	0.217411	0	0.180556	0.049176	0.398705	0.638133	0.0994195	-0.57531	14.8771	0.000114748	0.0741183	0.745511	1.18037	1.84973
	ENSMUSG00000024411.9	Aqp4	0.382333	0.149171	0.165776	0.230678	0.033025	0.422706	2.97111	0.140548	0.62347	0.568757	0.838172	0.231989	-0.577282	5.13471	0.0234521	0.10622	0.457865	1.21481	1.44936
	ENSMUSG00000102765.1	Ighv1-62	0	0.709386	0	0	0.227482	0.705706	1.85459	0	1.009	0.500685	0.759356	0.177346	-0.579508	4.7722	0.0289228	0.354693	2	0.72874	0.959682
	ENSMUSG00000078686.11	Mup9	1.18736	0.015351	1.32603	0	2.62791	0	0	1.28415	3.41308	1.09488	1.46503	0.632185	-0.594799	5.43014	0.0197921	0.723368	1.14423	1.53887	1.05041
	ENSMUSG00000030302.16	Atp2b2	5.36665	6.51562	3.57648	2.54247	3.2401	2.69862	1.16755	9.91104	19.5246	6.06035	7.30838	4.5003	-0.595056	5.54722	0.0185101	1.77938	0.395392	7.6079	1.04098
	ENSMUSG00000112521.1	Gm29884	0.102983	0.150863	0	0	0	0.176072	2.64438	0	0.211746	0.365116	0.60644	0.0634615	-0.595099	5.7426	0.0165583	0.0758413	1.19508	1.14343	1.88548
	ENSMUSG00000107508.1	Gm44083	0	0	0	0	0	1.54323	1.0299	0	0	0.285903	0.514626	0	-0.598962	6.94309	0.00841438	0	#NUM!	0.727677	1.41399
	ENSMUSG00000071561.2	BC100530	1.13367	1.53505	2.28559	0.468848	3.56782	0.568783	0.347999	4.55709	3.88409	2.03877	2.58516	1.35579	-0.605825	7.60425	0.00582309	0.759971	0.560537	1.9756	0.76421
	ENSMUSG00000029158.9	Yipf7	0.476028	0.090268	0.030776	0	0.041034	0.319083	2.54307	0	0.849316	0.483286	0.750501	0.149268	-0.607052	3.97014	0.0463139	0.221039	1.48082	1.0578	1.40946
	ENSMUSG00000082123.1	Gm16149	0	0.436018	0	0.94213	0.802803	1.67999	1.95208	0.592198	0.298909	0.744903	1.0652	0.344537	-0.619169	3.94364	0.047049	0.448292	1.30114	0.714896	0.671141
	ENSMUSG00000029685.15	Asb15	0.324057	0.161611	0.065177	0.051515	0.029047	0.166614	3.25698	0.073063	0.335881	0.495994	0.772317	0.15059	-0.623263	3.84884	0.0497803	0.125597	0.83403	1.39394	1.80488
	ENSMUSG00000020532.18	Acaca	70.7942	66.8005	60.9294	43.0571	60.4766	56.8747	21.8662	112.004	218.875	79.0753	94.0193	60.3953	-0.630092	4.82408	0.0280648	12.2483	0.202802	76.8494	0.817379
	ENSMUSG00000042306.11	S100a14	1.62784	5.21668	3.66278	1.01421	7.41271	1.24589	0.762636	8.93788	6.79014	4.07453	5.02985	2.88038	-0.635925	7.79737	0.00523222	1.92543	0.668466	3.76088	0.747712
	ENSMUSG00000078815.8	Cacng6	0.538884	0.117453	0.114072	0.112323	0	0.559434	3.6592	0	0.332131	0.603722	0.910153	0.220683	-0.646	5.13486	0.02345	0.212145	0.96131	1.55492	1.70842
	ENSMUSG00000032108.3	D730048I06Rik	2.32819	0.966854	0.467371	0.224548	1.88989	0.126615	0	2.75199	5.87297	1.62538	2.12829	0.996741	-0.647729	7.15597	0.0074715	0.939887	0.942961	2.39817	1.1268
	ENSMUSG00000110439.1	Gm21320	0.571003	0	0.608574	0.056802	1.5919	0	0	1.92742	1.77487	0.725619	1.05884	0.309095	-0.653261	13.0531	0.000302775	0.325308	1.05245	0.973854	0.919739
	ENSMUSG00000113767.1	Gm48873	0	0	0.222222	0.246446	0.559147	0.26208	0.705455	1.25149	1.09015	0.481888	0.773664	0.117167	-0.666888	11.5064	0.00069356	0.135654	1.15778	0.400272	0.517371
	ENSMUSG00000026645.11	Olah	30.8094	47.4023	35.2808	17.2362	32.9959	23.7592	0	66.3662	142.97	44.0911	53.2183	32.6822	-0.686794	6.25868	0.0123586	12.4569	0.381152	55.5365	1.04356
	ENSMUSG00000061780.6	Cfd	18.0665	7.71953	7.45456	1.35185	29.4686	0.538528	5.55049	13.4051	23.7619	11.9241	14.5449	8.64811	-0.688125	4.65173	0.0310223	6.93369	0.801758	12.1042	0.832194
	ENSMUSG00000062751.5	Prss1	0	1e-06	1e-06	2e-06	1e-06	2e-06	3.14162	0	0	0.34907	0.628325	1e-06	-0.703387	23.3382	1.35872e-06	8.16497e-07	0.816497	1.40497	2.23607
	ENSMUSG00000079025.9	Gsdmc	0.249626	0.724984	0.468833	0.147432	0.693492	0.411882	0	1.23658	4.06968	0.889168	1.28233	0.397719	-0.707431	15.3923	8.73446e-05	0.256082	0.643878	1.62174	1.26469
	ENSMUSG00000015652.9	Steap1	2.06664	2.01314	1.81618	0.638535	2.45281	1.40205	0	3.60647	9.04843	2.56047	3.30195	1.63362	-0.707942	8.07995	0.00447576	0.672077	0.411403	3.47665	1.05291
	ENSMUSG00000042529.14	Kcnj12	0.424352	0.070902	0.043685	0.051164	0.009762	0.608282	3.25526	0.009538	0.507894	0.553427	0.878147	0.147526	-0.710784	6.68428	0.0097267	0.184908	1.25339	1.35731	1.54565
	ENSMUSG00000095891.7	Gm10717	1.87852	2.82336	0.60162	0.182453	3.06268	6.14144	0.471819	1.9424	2.84524	2.21661	2.89272	1.37149	-0.714984	5.4082	0.0200424	1.20713	0.880163	2.08262	0.719953
	ENSMUSG00000027004.3	Frzb	0.383367	0.05075	0.122912	0.072068	0.089398	0.537105	3.59049	0	0.294221	0.571146	0.902243	0.157274	-0.716971	6.99936	0.00815387	0.153738	0.977516	1.51694	1.6813
	ENSMUSG00000026100.6	Mstn	0.308192	0.130835	0	0	0	0.250147	3.1813	0	0.70535	0.508425	0.827359	0.109757	-0.719517	10.4747	0.00121021	0.145961	1.32986	1.34705	1.62813
	ENSMUSG00000003476.16	Crhr2	0.300141	0.089988	0.117726	0.14277	0.102712	0.7357	3.32582	0	0.458869	0.58597	0.92462	0.162656	-0.727149	7.88005	0.00499831	0.0941575	0.578874	1.37376	1.48575
	ENSMUSG00000084126.1	Gm15844	0.755169	0.367501	0.185145	0.742139	1.20867	1.83109	2.98279	1.06515	0.591115	1.08097	1.53576	0.512489	-0.745496	5.92304	0.0149441	0.28273	0.55168	0.922216	0.600494
	ENSMUSG00000076549.2	Igkv4-68	1.07102	6.0203	5.51498	6.15091	31.0857	2.99546	5.04973	0.779404	2.99703	6.85161	8.58146	4.6893	-0.751994	8.06224	0.00451972	2.42773	0.517716	12.6706	1.47651
	ENSMUSG00000081375.1	Gm14686	0	0.755705	0	0.598635	0.428812	2.90413	1.70693	0.560796	0.779206	0.859357	1.27597	0.338585	-0.765776	5.91226	0.0150359	0.396188	1.17013	1.03833	0.813758
	ENSMUSG00000083010.1	Gm14687	0	0	0	0	0.332487	1.70583	0	0.563481	0.929693	0.392388	0.706298	0	-0.77087	15.444	8.49858e-05	0	#NUM!	0.653444	0.925168
	ENSMUSG00000106240.1	Gm3544	0	0	0	0	0	1.08475	2.14465	0	0.310424	0.393314	0.707965	0	-0.772278	7.28683	0.00694619	0	#NUM!	0.917401	1.29583
	ENSMUSG00000084207.1	Gm14070	0.118052	0.519355	0.685475	0.384303	0.327534	2.82322	3.83684	0.23897	0.120726	1.00605	1.46946	0.426796	-0.791415	4.55214	0.0328775	0.239868	0.562021	1.73741	1.18235
	ENSMUSG00000081025.1	Gm11943	0	0	0.364392	0	0	1.67646	2.79713	0	0	0.537554	0.894718	0.091098	-0.796202	5.1135	0.0237404	0.182196	2	1.28762	1.43913
	ENSMUSG00000095497.2	Igkv1-122	0	0.465137	1.14333	1.26902	0.287299	0	7.24998	0	2.41411	1.42543	1.99028	0.719372	-0.798398	4.39635	0.036016	0.595535	0.827854	3.10913	1.56216
	ENSMUSG00000082812.1	Gm14860	0	0.172112	0.681612	0.382227	0.10859	2.20549	2.72539	0.831442	0.600277	0.856349	1.29424	0.308988	-0.809563	7.55763	0.00597565	0.293497	0.949866	1.11581	0.862134
	ENSMUSG00000078532.9	Nkain1	0.649033	0.343285	1.26104	0.109545	2.50815	0.379468	4.09658	0.87959	1.09222	1.25766	1.7912	0.590726	-0.811201	5.46713	0.0193774	0.498492	0.843864	1.51174	0.843979
	ENSMUSG00000009633.3	G0s2	5.91611	8.65837	3.4697	4.24775	3.99173	5.17687	6.62541	11.2998	26.2627	8.40538	10.6713	5.57298	-0.828345	6.70227	0.00962904	2.29618	0.412021	9.14688	0.857147
	ENSMUSG00000104058.1	Etv3l	0	0	0	0	0	1.42972	1.28581	1.1913	0	0.434092	0.781366	0	-0.832984	11.0783	0.000873461	0	#NUM!	0.718321	0.919314
	ENSMUSG00000049233.7	Apoo-ps	0.25823	0	0	0	0	2.87408	1.62147	0	0.071333	0.536124	0.913377	0.0645575	-0.845867	11.497	0.000697086	0.129115	2	1.29647	1.41942
	ENSMUSG00000047746.14	Fbxo40	1.61534	1.17299	0.695274	0.509916	0.02449	0.759081	10.3357	0.162533	1.68627	1.88462	2.59361	0.99838	-0.846605	4.08855	0.0431746	0.497192	0.497998	4.37719	1.68768
	ENSMUSG00000079278.1	Tmem233	0.330963	0.064945	0.013342	0.015632	0	0.245231	4.15706	0	0.553021	0.597799	0.991062	0.10622	-0.847899	11.116	0.000855867	0.151708	1.42823	1.78438	1.80048
	ENSMUSG00000114110.1	Gm46379	0.443906	3.82948	1.96969	3.60574	3.31196	6.1186	11.1366	1.6691	4.07426	4.0177	5.2621	2.4622	-0.854957	4.13665	0.0419642	1.58042	0.641873	3.65264	0.69414
	ENSMUSG00000056071.12	S100a9	1.26321	0.461681	3.70093	3.38536	0.744625	0.540328	5.57862	16.8652	0.245654	3.64285	4.79489	2.2028	-0.855449	8.7543	0.00308872	1.58715	0.720518	7.09768	1.48026
	ENSMUSG00000083287.4	Gm13502	1.12362	0.358985	1.92768	1.53559	2.04961	3.01855	5.63685	1.18785	3.47547	2.25713	3.07367	1.23647	-0.865105	6.15004	0.0131409	0.67081	0.542521	1.6837	0.547783
	ENSMUSG00000058966.13	Fam57b	0.810006	0.317675	0.185922	0.184266	0.588486	1.05163	4.86578	0.304804	0.955445	1.02933	1.55323	0.374467	-0.89345	8.54871	0.00345767	0.29701	0.793154	1.87558	1.20754
	ENSMUSG00000030433.15	Sbk2	0.671842	0.427655	0.033566	0.029675	0.050926	1.10526	4.6017	0	1.26275	0.909264	1.40413	0.290685	-0.897377	8.62877	0.00330894	0.315319	1.08475	1.87993	1.33886
	ENSMUSG00000113114.1	Gm47846	0	2.61246	1.36143	0	4.68171	0	4.09234	0.872236	3.95957	1.95331	2.72117	0.993472	-0.900473	4.02254	0.0448959	1.25572	1.26397	2.12608	0.781309
	ENSMUSG00000047591.5	Mafa	0.535933	0.232285	0.155144	0.20982	0.128124	1.13763	4.90036	0.124939	0.835912	0.917794	1.42539	0.283295	-0.918365	7.69109	0.0055494	0.171512	0.605418	1.99247	1.39784
	ENSMUSG00000024827.9	Gldc	0.953287	1.79566	2.29564	0.596334	3.35758	0.875121	0.027505	4.92041	8.93316	2.63941	3.62276	1.41023	-0.939582	12.7467	0.000356643	0.775399	0.549839	3.5507	0.980111
	ENSMUSG00000073184.3	Gm10479	0.440951	0	0.714791	2.30476	0.838078	4.99654	5.45456	1.49819	0.130564	1.81983	2.58359	0.865125	-0.942131	4.41922	0.0355362	1.00391	1.16042	2.46511	0.954142
	ENSMUSG00000042686.5	Jph1	1.09016	0.983638	0.356896	0.28899	0.188712	1.06945	8.80441	0.126732	1.1059	1.55721	2.25904	0.679921	-0.956054	4.46504	0.0345952	0.415416	0.610977	3.68849	1.63277
	ENSMUSG00000082127.2	Gm13577	0	0	0	0	0	0	1.71888	0	3.16751	0.542932	0.977278	0	-0.983516	6.51902	0.0106727	0	#NUM!	1.43286	1.46617
	ENSMUSG00000006542.13	Prkag3	0.21205	0.223439	0.196883	0.179549	0.107869	0.907376	5.39952	0.067522	0.57692	0.87457	1.41184	0.20298	-1.00352	9.32346	0.00226238	0.0190352	0.0937788	2.25614	1.59801
	ENSMUSG00000030137.8	Tuba8	0.762402	0.474509	0.487244	0.518752	0.692826	0.93309	7.21112	0.338529	1.55089	1.44104	2.14529	0.560727	-1.01098	6.90479	0.00859653	0.13573	0.242061	2.86616	1.33602
	ENSMUSG00000083558.1	Gm12896	1866.33	5764.88	327.523	4788.83	5506.91	14138	184.72	13366	290.027	5137.02	6697.13	3186.89	-1.07116	8.75326	0.00309049	2525.35	0.792417	6795.58	1.0147
	ENSMUSG00000076547.2	Igkv4-70	0.652876	0.239555	2.7074	0.453648	5.76087	1.75525	2.31104	1.7653	4.79247	2.27093	3.27699	1.01337	-1.08698	11.4802	0.00070343	1.14189	1.12683	1.87085	0.570905
	ENSMUSG00000029862.15	Clcn1	1.01488	0.933813	0.869555	0.874499	0.642855	1.03393	11.1198	0.174177	2.53777	2.13348	3.10171	0.923187	-1.09273	5.25603	0.0218708	0.0677432	0.0733798	4.56891	1.47303
	ENSMUSG00000048416.15	Mlf1	1.33721	0.169086	0.242091	0.281817	0.068997	0.756687	8.58033	0.126331	1.75101	1.47928	2.25667	0.507551	-1.11119	5.84632	0.0156097	0.555073	1.09363	3.59926	1.59494
	ENSMUSG00000109068.1	Gm45207	0	0	0	0	0	1.86132	2.83967	1.15037	0	0.650151	1.17027	0	-1.11788	3.8569	0.0495419	0	#NUM!	1.22514	1.04689
	ENSMUSG00000097829.3	Myadm	0	1.68186	1e-06	0	2.36109	3.16204	4.36064	0.000965	0.557398	1.34711	2.08843	0.420465	-1.12051	13.4764	0.000241584	0.84093	2	1.80911	0.866254
	ENSMUSG00000008658.16	Rbfox1	1.11929	1.24467	0.226107	0.207505	0.029416	1.53321	10.2041	0	2.17802	1.86026	2.78895	0.699393	-1.15678	5.93774	0.01482	0.559641	0.800181	4.25229	1.52469
	ENSMUSG00000097221.1	1810049J17Rik	1.4518	0.542061	0.432349	1.05618	11.7911	1.8544	0.819042	1.4592	0	2.15624	3.18475	0.870598	-1.16164	13.045	0.000304095	0.473369	0.543729	4.86199	1.52665
	ENSMUSG00000001508.15	Sgca	1.43838	0.37816	0.289163	0.059047	0.027014	0.680892	8.61691	0	2.99004	1.60885	2.46297	0.541188	-1.16797	4.47458	0.0344026	0.613055	1.1328	3.65119	1.48243
	ENSMUSG00000022215.6	Fitm1	1.28462	0.325039	0.04145	0.096336	0	1.48269	8.31874	0	1.35916	1.43423	2.23212	0.436861	-1.16956	5.4144	0.0199713	0.578362	1.3239	3.47618	1.55735
	ENSMUSG00000064356.3	mt-Atp8	283.027	380.409	370.241	537.751	371.516	702.733	2651.21	305.535	408.852	667.919	887.969	392.857	-1.17446	4.00665	0.045321	106.024	0.26988	997.351	1.12318
	ENSMUSG00000028444.17	Cntfr	0.755294	2.55297	1.26789	1.50483	1.38996	6.62703	13.3399	1.26519	1.12511	3.31424	4.74944	1.52025	-1.18986	3.93797	0.0472076	0.756217	0.497431	5.3358	1.12346
	ENSMUSG00000038663.7	Fsd2	0.894146	0.193143	0.111247	0.055948	0.026696	0.684031	7.99881	0.015572	1.30105	1.2534	2.00523	0.313621	-1.19393	8.02542	0.00461253	0.391099	1.24704	3.39256	1.69185
	ENSMUSG00000095682.1	Igkv3-1	1.14658	3.3389	2.75055	1.21008	1.54349	0.85728	5.18507	0	23.2221	4.36156	6.16159	2.11153	-1.20266	11.6093	0.000656232	1.10431	0.522993	9.73964	1.5807
	ENSMUSG00000049173.7	Myoz3	0.65119	0.33174	0.048269	0.055981	0	0.390296	8.04146	0	1.30667	1.20285	1.94769	0.271795	-1.21272	9.13747	0.00250427	0.285233	1.04944	3.44809	1.77035
	ENSMUSG00000067279.2	Ppp1r3c	2.72567	0.725948	0.481243	0.310227	0.282538	2.72213	12.2234	0.188938	3.49116	2.57236	3.78163	1.06077	-1.21432	4.14336	0.041798	1.12297	1.05863	4.94018	1.30636
	ENSMUSG00000038403.10	Hfe2	1.77252	0.52141	0.016723	0.058722	0.011203	1.11485	10.4722	0	1.87577	1.76038	2.6948	0.592344	-1.21435	4.47027	0.0344896	0.819337	1.38321	4.41924	1.63991
	ENSMUSG00000026407.17	Cacna1s	3.59832	1.46787	0.862492	1.02063	0.29085	3.66127	20.831	0.107855	3.14979	3.88779	5.60815	1.73733	-1.27148	4.00816	0.0452806	1.26687	0.729207	8.66164	1.54447
	ENSMUSG00000044938.8	Klhl31	2.51092	0.840918	0.453692	0.465401	0.205427	1.60306	15.695	0.11593	3.41726	2.81196	4.20734	1.06773	-1.3325	4.6048	0.0318826	0.978789	0.916699	6.55987	1.55915
	ENSMUSG00000044748.8	Defb1	1.75246	1.93667	1.2028	0.334812	4.62301	0.111148	0.23346	13.1027	6.10093	3.26644	4.83425	1.30669	-1.33873	16.6591	4.47358e-05	0.71901	0.550255	5.32662	1.10185
	ENSMUSG00000091421.3	Gm4202	0	0.470479	1.01794	0	0	6.26191	4.80469	1.20543	0.536559	1.58856	2.56172	0.372105	-1.37618	15.8347	6.91247e-05	0.484322	1.30158	2.79399	1.09067
	ENSMUSG00000042451.12	Mybph	1.59057	0.55131	0.207366	0.154359	0.025238	1.99091	12.5245	0.086591	2.13659	2.14083	3.35277	0.625901	-1.42069	6.88792	0.00867803	0.666752	1.06527	5.22482	1.55836
	ENSMUSG00000029188.14	Slc34a2	11.3605	15.5387	10.878	6.79924	10.4572	8.56167	0.012273	38.5244	101.03	22.5736	31.7171	11.1441	-1.42979	13.0395	0.000304988	3.57342	0.320655	41.3641	1.30416
	ENSMUSG00000106037.1	Gm4332	4.22379	3.77185	12.5904	4.46481	9.72867	33.7237	36.4657	6.22414	7.09936	13.1436	18.6483	6.26271	-1.43583	6.73984	0.00942828	4.22823	0.675143	15.0999	0.809718
	ENSMUSG00000083667.1	Gm11334	0	0	0	0	2.94683	4.31667	0	1.34872	0	0.956913	1.72244	0	-1.4449	6.18957	0.0128505	0	#NUM!	1.89093	1.09782
	ENSMUSG00000002500.15	Rpl3l	2.86602	0.914702	0.609761	0.553169	0.147222	2.41055	19.955	0.331254	3.22185	3.4455	5.21318	1.23591	-1.47447	5.148	0.0232732	1.09828	0.888635	8.34623	1.60099
	ENSMUSG00000035606.8	Ky	0.434748	0.29319	0.06371	0.556045	0	1.11404	12.1113	0	1.11521	1.74314	2.86811	0.336923	-1.53271	16.661	4.46899e-05	0.211457	0.627612	5.19707	1.81202
	ENSMUSG00000112791.1	Gm47612	0.649651	0.712452	0	0	0	2.08399	11.2753	0	1.34645	1.78532	2.94115	0.340526	-1.55582	10.8632	0.000980922	0.39404	1.15715	4.74438	1.6131
	ENSMUSG00000082405.1	Gm16021	0	0.903852	0	0	0.629728	3.81623	6.68972	0.583311	1.34645	1.55214	2.61309	0.225963	-1.55932	8.07076	0.00449853	0.451926	2	2.63271	1.00751
	ENSMUSG00000105081.1	Gm43110	0	0.6292	3.4819	0.561633	0	8.04712	11.5557	0.304164	7.60919	3.57655	5.50323	1.16818	-1.58467	8.70846	0.00316737	1.56805	1.3423	5.11993	0.930349
	ENSMUSG00000027887.11	Sypl2	1.05597	0.172815	0.139114	0.163256	0.088288	1.18862	12.9693	0.060578	1.63001	1.94088	3.18736	0.382789	-1.59846	9.53344	0.00201762	0.449012	1.173	5.51107	1.72904
	ENSMUSG00000104967.1	Gm43436	0	0	0	1.99419	0	0	12.362	0	6.02914	2.26504	3.67823	0.498547	-1.6424	4.65778	0.0309131	0.997095	2	5.51187	1.49851
	ENSMUSG00000033044.12	Dhrs7c	1.37626	0.748969	0	0	0	1.3233	14.8973	0	2.84427	2.35446	3.81297	0.531307	-1.65216	8.12205	0.004373	0.664805	1.25126	6.30628	1.6539
	ENSMUSG00000007097.14	Atp1a2	7.34445	1.626	1.1519	1.61482	0.500652	6.77278	43.2637	0.286147	7.21925	7.7533	11.6085	2.93429	-1.68022	3.90136	0.048247	2.94839	1.00481	18.002	1.55076
	ENSMUSG00000115005.1	AC152940.1	0	0.80503	0	0	1.29103	4.29517	9.27971	0.587656	0	1.80651	3.09071	0.201258	-1.76781	7.92899	0.00486489	0.402515	2	3.83442	1.24063
	ENSMUSG00000076543.2	Igkv4-74	0.454492	0.215011	2.16643	1.35365	1.36143	3.66347	1.54008	6.25223	18.0526	3.89549	6.17396	1.0474	-1.80898	21.9491	2.79979e-06	0.892642	0.852249	6.929	1.12229
	ENSMUSG00000025488.9	Cox8b	13.0779	2.50128	2.18265	3.60193	3.06282	6.08779	81.4704	0.192378	16.1837	14.2623	21.3994	5.34094	-1.82069	4.97705	0.0256858	5.19369	0.972429	34.118	1.59434
	ENSMUSG00000031461.4	Myom2	6.71947	1.94979	0.544555	0.873865	0.137135	5.43198	45.0138	0.08206	6.9164	7.51878	11.5163	2.52192	-1.82937	4.75955	0.0291362	2.86198	1.13484	18.9769	1.64783
	ENSMUSG00000030785.8	Cox6a2	9.2285	1.10376	0.349486	1.04728	0	4.61797	48.7387	0	12.473	8.61763	13.1659	2.93226	-1.849	5.07099	0.0243294	4.21149	1.43626	20.5284	1.5592
	ENSMUSG00000001027.7	Scn4a	2.78008	0.417574	0.242949	0.49939	0.040857	1.91588	23.7719	0.018287	5.03178	3.85763	6.15574	0.984998	-1.84996	5.06542	0.0244078	1.20149	1.21979	10.0577	1.63387
	ENSMUSG00000030672.12	Mylpf	56.4862	31.2321	28.6934	46.6711	0.376101	92.2669	580.689	0.445063	88.367	102.803	152.429	40.7707	-1.87701	8.78646	0.00303474	13.1484	0.322495	243.593	1.59807
	ENSMUSG00000038239.11	Hrc	3.18427	0.74956	0.212014	0.132349	0.121157	2.85943	26.4398	0.147204	4.32788	4.24152	6.77909	1.06955	-1.91029	7.75932	0.0053436	1.43622	1.34282	11.1381	1.643
	ENSMUSG00000032648.14	Pygm	26.1596	5.66122	2.85683	4.50019	0.403356	17.474	161.979	0.7729	26.9949	27.4224	41.5248	9.79446	-1.97801	4.45501	0.034799	10.9706	1.12008	68.2834	1.6444
	ENSMUSG00000026817.14	Ak1	6.31496	2.15352	2.74997	1.15099	1.81938	6.98885	57.8918	1.11122	8.51105	9.85464	15.2645	3.09236	-1.99072	6.57391	0.0103484	2.24742	0.726766	24.043	1.5751
	ENSMUSG00000020475.3	Pgam2	16.6783	5.33459	3.65387	4.7052	1.47838	17.2413	133.517	0.472445	17.7108	22.3102	34.084	7.59299	-2.02958	5.22506	0.0222637	6.09643	0.802902	56.1951	1.64872
	ENSMUSG00000040666.18	Sh3bgr	2.48574	0.874177	0.543598	1.22764	0.230703	5.72331	32.6152	0.959595	2.81439	5.27493	8.46864	1.28279	-2.05236	4.71616	0.0298804	0.849215	0.662007	13.6639	1.61348
	ENSMUSG00000060600.15	Eno3	32.2498	14.2574	10.2197	15.595	1.19881	47.6267	311.253	0.70855	39.4287	52.5042	80.0432	18.0805	-2.08659	5.27462	0.0216385	9.71863	0.53752	131.024	1.63691
	ENSMUSG00000030592.18	Ryr1	11.0274	1.7289	0.706982	0.493956	0.113007	10.9747	72.6594	0.143415	11.9735	12.2024	19.1728	3.48931	-2.16785	5.9891	0.0143946	5.05422	1.44849	30.4354	1.58742
	ENSMUSG00000038670.11	Mybpc2	12.5668	2.465	0.353283	0.518073	0.077125	9.67226	88.3391	0.098167	15.5563	14.4051	22.7486	3.97579	-2.25484	6.56264	0.0104142	5.80707	1.46061	37.2554	1.6377
	ENSMUSG00000046818.7	Ddit4l	3.51302	0.403208	0.333101	0.23289	0.311165	8.45408	36.9075	0.441746	3.5554	6.0169	9.93398	1.12055	-2.3663	7.31047	0.0068554	1.59651	1.42475	15.4365	1.55391
	ENSMUSG00000051747.14	Ttn	182.549	26.0083	8.50266	10.9234	0.338402	152.218	1248.2	0.606279	196.768	202.902	319.626	56.9958	-2.46687	3.95668	0.0466857	84.0597	1.47484	526.566	1.64744
	ENSMUSG00000007122.11	Casq1	8.30901	1.54336	0.403053	0.516302	0.107496	8.75791	88.87	0.053474	10.9426	13.2781	21.7463	2.69293	-2.62279	10.096	0.00148594	3.77903	1.40331	37.8478	1.74043
	ENSMUSG00000021622.3	Ckmt2	4.64482	0.870161	0.240942	0.084423	0.032199	4.29755	63.5137	0.047535	6.15833	8.87663	14.8099	1.46009	-2.68404	12.1614	0.000487887	2.15014	1.47261	27.3575	1.84725
	ENSMUSG00000031097.15	Tnni2	56.8987	11.2167	3.41506	0.645848	1.05074	52.0981	530.166	0.59152	74.6995	81.198	131.721	18.0441	-2.80098	9.08093	0.00258288	26.2869	1.45682	225.066	1.70866
	ENSMUSG00000061723.18	Tnnt3	90.3427	19.342	3.86771	2.38204	0.251896	86.4381	917.987	0.052593	133.845	139.39	227.715	28.9836	-2.9313	9.8376	0.0017098	41.6187	1.43594	390.133	1.71325
	ENSMUSG00000061167.9	Rpl15-ps3	0	0	0	0.701022	14.8239	37.6716	15.6104	2.6e-05	0	7.64522	13.6212	0.175256	-3.63701	57.3117	3.71928e-14	0.350511	2	15.4507	1.13432
