# Supplementary material for: Cabergoline as a Novel Strategy for Post-Pregnancy Breast Cancer Prevention in Mice and Human
Source: Research Square preprint supplement (doi:10.21203/rs.3.rs-3854490/v1), 2024-02-05
Supplement: Supplementary file 10 [file 9c1c80fcad9b753ff408974a.xlsx]

## Sheet: Supplementary Table S9
	Epithelial Cell Proliferation	Morphogenesis, Mammary Gland Development and Branching
	Etv4	Etv4
	Ovol1	Proc
	Fermt1	Muc20
	Muc16	Slit2
	Hpn	Wnt7b
	Eppk1	Efna5
	Reg3g	Irx1
	Esrp2	Hpn
	Arg1	Esrp2
	Irf6	Syne4
	Sox9	Kif26b
	Pgr	Sox9
	Erbb4	Atp7b
	Gdf5	Ptk7
	Esrp1	Irf6
	Cdh3	Erbb4
	Krt4	Tph1
	Cnmd	Pgr
	Nkx2-3	Foxa1
	Ptn	Esrp1
	Epcam	Shroom3
	Ovol2	Crabp2
	Vdr	Atp2c2
	Marveld3	Nkx2-3
	Kdf1	Hp
	Fut1	Ptn
	Fgfr2	Postn
	Cdh1	Ovol2
	Ang4	Edn2
	Cxadr	Tfcp2l1
	Tacstd2	Cst10
	Trp63	Hgf
	Serpinb5	Vdr
	Bnc1	Spint1
		Tfap2a
		Met
		Csn2
		Edar
		Foxa3
		Irx3
		Lcn2
		Prlr
		Grhl2
		Csn3
		Elf5
		Fgfr2
		Pak6
		Cdh1
		Irx2
		Myo5b
		Cthrc1
		Lama1
		Wnt9b
		Tacstd2
		Trp63
		Stra6
		Serpinb5
		Tnc
		Tfap2c
		Map2
		Elf3
