# Supplementary material for: Cabergoline as a Novel Strategy for Post-Pregnancy Breast Cancer Prevention in Mice and Human
Source: Research Square preprint supplement (doi:10.21203/rs.3.rs-3854490/v1), 2024-02-05
Supplement: Supplementary file 11 [file 9c7fecd88f3da9804e64b89d.xlsx]

## Sheet: Supplementary Table S10
	Row.names	Symbol	D1_Mult_lact	D3_Mult_lact	D4_Mult_lact	D5_Mult_lact	F1_Mult_AD	F2_Mult_AD	F3_Mult_AD	F4_Mult_AD	F5_Mult_AD	Exp_Mean	Mean_Mult_lact	Mean_Mult_AD	Log2FC	Stat	P value	P adj
	ENSMUSG00000066009.8	Zfp987	0	0.050421	0.151201	1.07908	62.6798	134.225	36.8921	0	161.547	44.0694	0.320176	79.0688	5.92244	13.6188	0.000223931	0.0227723
	ENSMUSG00000085791.4	Rpl30-ps9	0	0	0	0.00198	4.4e-05	5.21072	115.522	96.4104	2e-05	24.1272	0.000495	43.4286	5.4727	56.9011	4.58279e-14	9.6315e-11
	ENSMUSG00000058625.5	Gm17383	0	0	0	0	0	0	0	108.697	0	12.0774	0	21.7394	4.50712	83.2649	7.17642e-20	6.03298e-16
	ENSMUSG00000044330.8	Gm9790	0	1.40944	0	0	0	0	0	125.41	0	14.091	0.35236	25.082	4.2695	35.4374	2.63379e-09	1.748e-06
	ENSMUSG00000110458.1	Gm21769	0	0	0	0	0	0	0	87.311	0	9.70122	0	17.4622	4.2065	26.8243	2.2282e-07	7.3941e-05
	ENSMUSG00000094248.1	Hist1h2ao	0	0	2.07529	0	14.8492	0	51.3593	66.9083	0	15.0213	0.518822	26.6234	4.18486	41.9278	9.47068e-11	1.13738e-07
	ENSMUSG00000031258.4	Xkrx	3788.07	112.05	182.545	365.282	517.181	297.645	1492.91	88189.8	358.347	10589.3	1111.99	18171.2	4.02922	33.4425	7.34035e-09	4.11386e-06
	ENSMUSG00000027694.9	Gm8325	0	0	0	0	1.95366	0	0	62.079	0	7.11474	0	12.8065	3.78728	48.6247	3.09948e-12	4.59816e-09
	ENSMUSG00000029074.14	Ttll10	7.63617	0.334132	0.510066	1.02021	1.54814	2.64339	11.0574	177.859	19.2387	24.6497	2.37514	42.4693	3.68698	31.6324	1.86298e-08	9.05502e-06
	ENSMUSG00000113545.1	Gm48238	0	0	0	0	0	0	58.5982	0	0	6.51091	0	11.7196	3.66899	21.1466	4.25451e-06	0.000917083
	ENSMUSG00000029920.9	Smarcad1	416.248	63.9753	67.3432	91.3964	110.882	104.624	206.53	9138.3	118.448	1146.42	159.741	1935.76	3.59084	18.7202	1.51374e-05	0.00260004
	ENSMUSG00000084190.1	Gm11869	0	0.718543	1.64214	0.2971	4.31222	3.81062	2.6212	63.6354	3.29846	8.92619	0.664446	15.5356	3.31246	25.4762	4.47883e-07	0.000134471
	ENSMUSG00000098799.1	Trgj4	39.1343	8.30046	0	8.68737	0	0	8.78098	664.951	28.241	84.2328	14.0305	140.395	3.23376	13.6719	0.000217692	0.0222275
	ENSMUSG00000090036.1	Gm15900	0	0	0	0	0	0	0	41.3138	0	4.59042	0	8.26276	3.21144	31.2715	2.24351e-08	1.04717e-05
	ENSMUSG00000057072.11	Spata45	0	0	0.798658	0	1.58017	0.452697	2.46842	44.6474	1.04603	5.66593	0.199664	10.0389	3.2019	33.4864	7.17629e-09	4.11332e-06
	ENSMUSG00000068397.4	Gm10240	0.009541	0.005541	0.006218	0.045315	0.024221	36.9007	0.007097	1.8e-05	0.020946	4.11329	0.0166537	7.3906	3.04494	35.5719	2.45804e-09	1.67546e-06
	ENSMUSG00000090550.2	Prlh	3.5805	0	1.42673	0	0	0	0	85.2964	0	10.0337	1.25181	17.0593	3.00358	22.2005	2.45609e-06	0.00056828
	ENSMUSG00000091228.1	Gm20390	0	0	0	0.185073	0	0	0	36.7621	0	4.10524	0.0462682	7.35242	2.99694	52.0324	5.45912e-13	9.17861e-10
	ENSMUSG00000042082.7	Arsb	55.896	14.6729	12.1023	19.7649	18.7458	14.5038	27.6383	895.818	24.2402	120.376	25.609	196.189	2.88959	19.6011	9.5413e-06	0.00179576
	ENSMUSG00000083585.1	Gm15885	1.35701	1.78456	0.515327	0	0	0	3.24382	54.6772	4.78635	7.37381	0.914224	12.5415	2.82255	21.8353	2.97084e-06	0.00066305
	ENSMUSG00000094124.5	Ighv1-74	0	0	0	1.79548	0	0	0	0	45.3483	5.2382	0.44887	9.06966	2.79701	16.2262	5.62117e-05	0.00774677
	ENSMUSG00000076535.1	Igkv1-88	0	0	1.23954	3.62451	1.95531	2.14958	6.57115	50.6606	5.79791	7.99984	1.21601	13.4269	2.70272	19.2346	1.15601e-05	0.00209745
	ENSMUSG00000069083.4	Gm10259	0	0	0	0.029538	0	0	0	27.7444	0	3.08599	0.0073845	5.54888	2.70063	63.0536	2.01159e-15	8.45537e-12
	ENSMUSG00000106545.1	Gm33952	0	0	0	1.06623	0	0	0	34.5649	0	3.95901	0.266558	6.91298	2.64331	24.8762	6.11332e-07	0.000171309
	ENSMUSG00000116022.1	Slfn2	0	0	0	0.468279	0	0	0	28.7346	0	3.24476	0.11707	5.74692	2.59451	44.6611	2.34263e-11	2.95405e-08
	ENSMUSG00000083670.1	Gm6829	0	0	0	2.18057	0	0	0	41.5055	0	4.85401	0.545142	8.3011	2.58966	20.5926	5.68155e-06	0.00116495
	ENSMUSG00000113339.1	Gm17915	0	0	0	0	0.259822	0	0	23.4303	0	2.63224	0	4.73802	2.52055	37.9281	7.34009e-10	6.38335e-07
	ENSMUSG00000105094.1	Obox4-ps10	0	0.495683	0.582678	0	0	0	0	31.4232	0	3.61128	0.26959	6.28464	2.52049	25.3428	4.79937e-07	0.000139127
	ENSMUSG00000070419.11	Cyp3a57	0	0.368942	0.370832	0.309914	0.063707	1.05559	10.0271	12.9721	6.44841	3.51295	0.262422	6.11338	2.49434	32.7567	1.04445e-08	5.7263e-06
	ENSMUSG00000083866.1	Gm13472	0	0	0.950048	0	0	0	3.01691	25.6399	0	3.28965	0.237512	5.73136	2.44346	16.9274	3.88366e-05	0.00566161
	ENSMUSG00000090197.1	Dnaja1-ps	0	0.161748	0.575301	0	0	0	0.189839	26.1975	0	3.01382	0.184262	5.27747	2.40619	28.8064	7.99849e-08	3.30692e-05
	ENSMUSG00000029541.12	Cyp2w1	0	0.144639	0.638571	0	0.883546	0.37831	0.058684	24.5997	0.543463	3.02743	0.195802	5.29274	2.39571	27.181	1.85268e-07	6.40062e-05
	ENSMUSG00000101645.1	Gm28635	0.174122	0	0	0	0	0	0	22.4107	0	2.50942	0.0435305	4.48214	2.39327	61.0119	5.67318e-15	1.58975e-11
	ENSMUSG00000099545.1	Gm13276	0	0	0	0	0.776932	0	0	20.4808	0	2.36197	0	4.25155	2.39274	36.1673	1.8108e-09	1.34319e-06
	ENSMUSG00000083911.1	Gm4342	0	0	0	3.63808	1.28052	0	0	42.1797	0.840814	5.32657	0.90952	8.86021	2.36841	17.346	3.11546e-05	0.00464922
	ENSMUSG00000083017.1	Gm12163	0	0	0	4.1952	1.61241	0	0.53689	41.0999	4.07463	5.72434	1.0488	9.46477	2.35269	16.9971	3.74368e-05	0.00552138
	ENSMUSG00000061527.7	Krt5	0.637029	0.230339	0.039522	0.138254	0	0.941283	12.0849	6.44848	7.33993	3.09553	0.261286	5.36292	2.33479	31.6912	1.80738e-08	9.05502e-06
	ENSMUSG00000091478.2	Gm10039	0	0	0	0	0	0	0	0	20.0972	2.23302	0	4.01944	2.32753	21.0682	4.43212e-06	0.000947272
	ENSMUSG00000026818.5	Cel	1.42444	0.441397	2.081	2.43172	0.917611	1.60808	25.1296	29.4503	2.01021	7.27715	1.59464	11.8232	2.30515	20.4489	6.12455e-06	0.00121623
	ENSMUSG00000080718.1	Gm8019	0	0	0	0	0	0	0	19.567	0	2.17411	0	3.9134	2.29672	36.6762	1.39469e-09	1.09919e-06
	ENSMUSG00000097854.1	Gm26602	4.81313	6.20089	0	0	6.57135	13.8456	2.65601	61.9229	1.68155	10.8546	2.75351	17.3355	2.28833	13.301	0.000265261	0.0262349
	ENSMUSG00000023043.7	Krt18	7.36602	8.0297	7.0404	1.58197	2.26392	10.8022	66.7701	53.3484	26.5757	20.4198	6.00452	31.9521	2.23401	12.0453	0.000519235	0.0435053
	ENSMUSG00000114905.1	Gm48113	3.05983	7.72086	6.96351	7.85989	11.1275	7.66747	14.4629	123.673	10.7393	21.4749	6.40102	33.534	2.22222	12.5812	0.000389645	0.034971
	ENSMUSG00000075014.1	Gm10800	3.74276	1.39264	1.28509	0.428814	0	0	7.00566	50.0361	0	7.09901	1.71233	11.4084	2.19371	15.9442	6.52364e-05	0.00856907
	ENSMUSG00000099634.1	Gm29462	0	0	0	0	0	0	0	17.7099	0	1.96777	0	3.54198	2.18332	15.4092	8.65654e-05	0.0109708
	ENSMUSG00000109558.1	Gm45100	1.33136	1.74903	2.52692	1.77482	3.18282	2.31765	2.64762	40.9508	8.70942	7.24338	1.84553	11.5617	2.14226	12.8007	0.00034649	0.0323648
	ENSMUSG00000000385.7	Tmprss2	0.783611	2.86538	2.49117	0.741593	0.68195	2.43474	27.226	14.1873	7.7823	6.57712	1.72044	10.4625	2.07501	13.3842	0.000253757	0.025497
	ENSMUSG00000096519.1	Gm10721	0	0	0.285221	0	0.544889	0.383725	0.561377	14.4206	1.13658	1.92582	0.0713053	3.40943	2.04122	28.742	8.26923e-08	3.36123e-05
	ENSMUSG00000092093.1	Gm17528	0	19.9143	17.0504	0	8.59582	9.1718	50.7644	121.121	12.8412	26.6065	9.24118	40.4988	2.01869	12.2398	0.000467811	0.0402669
	ENSMUSG00000045545.8	Krt14	0.352334	0.805786	0.636448	0.43296	0.090421	0.805199	16.2739	0	9.24207	3.18212	0.556882	5.28232	2.01264	17.5633	2.77904e-05	0.00424771
	ENSMUSG00000078097.3	Gm10913	0	0	0	0	0	0	0	15.1749	0	1.6861	0	3.03498	2.01256	26.5081	2.62432e-07	8.45714e-05
	ENSMUSG00000094103.2	1700047I17Rik2	0	0.037324	0	0	0	4e-06	0	9.50988	5.77278	1.70222	0.009331	3.05653	2.00685	62.0521	3.34485e-15	1.05446e-11
	ENSMUSG00000044748.8	Defb1	0	0	0	0	0.252547	0.802014	12.172	0	1.69418	1.65786	0	2.98415	1.99427	38.7248	4.87981e-10	4.39531e-07
	ENSMUSG00000083274.1	Zcchc9-ps	0	0.474862	0	0	0	0	0.692915	16.3582	0	1.94733	0.118716	3.41022	1.97901	26.827	2.22504e-07	7.3941e-05
	ENSMUSG00000094356.2	Igkv8-28	0.766319	0	0	5.464	2.45441	0	4.31949	33.5284	4.86786	5.71116	1.55758	9.03403	1.97205	11.8621	0.000572883	0.0470622
	ENSMUSG00000103760.1	Gm8009	0	0	0	0	0	0	0	14.2483	0	1.58314	0	2.84966	1.94473	24.0295	9.48693e-07	0.00024666
	ENSMUSG00000113097.1	Gm47959	0	2.63567	2.6913	0	1.70942	2.15133	3.58686	29.2685	2.94641	4.99883	1.33174	7.9325	1.93766	12.9255	0.000324131	0.0307315
	ENSMUSG00000085812.1	Gm15843	0	0.235997	0	0	0.277933	0	0	14.2516	0.691733	1.71747	0.0589993	3.04425	1.93317	23.7734	1.0837e-06	0.000273308
	ENSMUSG00000113174.1	Gm9292	0.219311	0.138111	0.164134	0	0.169956	0.180558	0	15.9687	0	1.8712	0.130389	3.26384	1.91533	25.6407	4.11276e-07	0.000126493
	ENSMUSG00000000792.2	Slc5a5	0.27072	1.19696	0.892128	0.301991	0.918342	1.4001	16.9842	2.5258	4.54905	3.22659	0.66545	5.2755	1.91382	16.4395	5.02277e-05	0.00711654
	ENSMUSG00000070522.4	Gm6505	0	0.27957	0.847733	1.0121	1.832	2.39645	0	18.4043	1.2768	2.89433	0.534851	4.78191	1.91345	16.6183	4.57083e-05	0.00651279
	ENSMUSG00000064194.10	Zfp936	0	1.39192	0.467396	0.579016	0.267214	2.62532	2.46926	13.832	5.94761	3.06442	0.609583	5.02828	1.90506	13.1521	0.000287195	0.0279655
	ENSMUSG00000089987.2	Gpx2-ps1	0	0.787811	0.930764	3.26263	1.20839	3.09937	2.55412	28.2214	1.48936	4.61709	1.2453	7.31453	1.88873	12.6234	0.000380942	0.0345589
	ENSMUSG00000093402.1	Gm18588	0	0	0	0	0	0	0	13.2335	0	1.47039	0	2.6467	1.86659	26.1906	3.09332e-07	9.75169e-05
	ENSMUSG00000074506.4	Gm10705	0	0	0	0	0	0	0	12.9797	0	1.44219	0	2.59594	1.84637	24.2632	8.40282e-07	0.000225446
	ENSMUSG00000115651.1	AC122769.4	0	0	0	0	0	0	0	12.9306	0	1.43673	0	2.58612	1.84242	40.1189	2.38965e-10	2.51113e-07
	ENSMUSG00000098153.1	Gm27024	0	0	0	0	0	0	0	12.7509	0	1.41677	0	2.55018	1.82789	35.8942	2.08331e-09	1.45948e-06
	ENSMUSG00000050808.13	Muc15	0.699919	1.10328	1.5799	1.28949	0.422046	4.11407	16.8273	4.18923	7.76692	4.22135	1.16815	6.66391	1.82162	13.6766	0.000217147	0.0222275
	ENSMUSG00000034226.7	Rhov	0	0.352454	0.158569	0.369841	0.108925	0.229266	1.83428	12.661	1.51797	1.9147	0.220216	3.27029	1.8072	24.957	5.86235e-07	0.000167445
	ENSMUSG00000039628.8	Hs3st6	3.4935	0	0.078957	1.19726	1.46598	0.515395	0.305953	29.39	1.68186	4.23654	1.19243	6.67184	1.80704	14.4306	0.000145416	0.0165198
	ENSMUSG00000092609.1	Gm20481	0	0	0	0	0	0	0	12.4591	0	1.38434	0	2.49182	1.80398	28.7068	8.42087e-08	3.36123e-05
	ENSMUSG00000055452.6	Gm7353	0	0.308237	0	0	0	0.662435	0	12.7241	0.34483	1.55996	0.0770592	2.74627	1.79836	37.4699	9.28333e-10	7.80418e-07
	ENSMUSG00000078886.12	Gm2026	0	0	0	0.447916	0	0.93723	0.588219	9.59172	3.18923	1.63937	0.111979	2.86128	1.79595	18.0096	2.19789e-05	0.00355326
	ENSMUSG00000096086.1	Gm4761	1.50087	0	0.225304	1.579	0.467733	0	0.897735	24.391	0.864299	3.3251	0.826294	5.32415	1.79195	14.2275	0.000161987	0.0179181
	ENSMUSG00000095054.1	Gm13146	0	0.720279	0.476411	0	0.343086	0	0.070257	16.4354	0.58084	2.06959	0.299173	3.48592	1.78781	18.7386	1.49918e-05	0.00260004
	ENSMUSG00000040715.12	Rsc1a1	0	1.64497	0	0	0	0.231088	0	18.726	0	2.28912	0.411243	3.79142	1.76349	18.5496	1.65543e-05	0.00280201
	ENSMUSG00000000381.10	Wap	0	0.194629	0	0	6.68989	1.57345	4.11641	0	0.317579	1.43244	0.0486572	2.53947	1.75499	16.688	4.40583e-05	0.00631335
	ENSMUSG00000047676.6	Rpsa-ps10	0.331956	0	0	0	0.260416	0	0	12.641	0.299082	1.50361	0.082989	2.6401	1.74896	29.2678	6.30334e-08	2.69441e-05
	ENSMUSG00000082357.1	Gm13542	0	0	2.33006	0.907184	0	1.50113	2.88463	20.5187	0.494467	3.1818	0.809311	5.07979	1.74858	12.9061	0.000327517	0.0308208
	ENSMUSG00000055109.5	Gm15155	0	0	0	0.53002	0	1.65874	0.941456	8.4883	1.19367	1.42358	0.132505	2.45643	1.60977	30.5479	3.25732e-08	1.46696e-05
	ENSMUSG00000070637.2	Srarp	0	0.194629	0	0	0	0.253906	0	10.5102	0	1.21764	0.0486572	2.15282	1.5881	27.5473	1.53302e-07	5.44547e-05
	ENSMUSG00000114942.1	Lats2	0	0	0	0	0	0	0	9.75506	0	1.0839	0	1.95101	1.56121	62.222	3.06836e-15	1.05446e-11
	ENSMUSG00000087286.1	Gm9013	0.36225	0.103113	0	0	0.26449	0.142748	0.244132	10.6275	0	1.30491	0.116341	2.25577	1.54422	23.6375	1.16296e-06	0.000282019
	ENSMUSG00000094094.2	Igkv5-45	0	0	0	0	0	0	5.52214	0	4.04482	1.063	0	1.91339	1.5427	11.9128	0.000557488	0.0462495
	ENSMUSG00000082154.1	Gm16464	0	0	0	0	0	0	0	9.47428	0	1.0527	0	1.89486	1.53349	39.1272	3.9708e-10	3.70902e-07
	ENSMUSG00000097989.1	Gm4335	0.135505	0.084671	0	0	0.10453	0	0	10.0959	0	1.15785	0.055044	2.04009	1.52681	28.5105	9.31899e-08	3.56098e-05
	ENSMUSG00000071195.4	Gm10318	0	0	0	0	0	0	0	8.89039	0	0.987821	0	1.77808	1.47409	34.6799	3.88629e-09	2.39054e-06
	ENSMUSG00000104841.1	Gm17743	0.506333	0.494116	1.02385	0.188527	0.114173	0.233766	6.91011	6.71835	2.5572	2.08294	0.553207	3.30672	1.47134	12.6519	0.000375186	0.0341595
	ENSMUSG00000100441.1	Gm7266	0	0	0	0	0	1.05915	5.35106	0	2.45046	0.984519	0	1.77213	1.471	12.5868	0.000388482	0.034971
	ENSMUSG00000090369.3	4933411K16Rik	0	0.509379	0.406903	0.71187	0.279684	0.515741	1.31118	11.6245	0.59394	1.77258	0.407038	2.86501	1.45781	14.7396	0.00012343	0.0144786
	ENSMUSG00000074812.11	Spdye4c	0	0	0	0	0	0	0	8.51407	0	0.946008	0	1.70281	1.43446	40.013	2.52285e-10	2.54505e-07
	ENSMUSG00000063975.13	Slco1a5	0	0.162979	0.363988	0	0.03748	0.078779	2.49402	6.30268	1.23814	1.18645	0.131742	2.03022	1.42088	24.4656	7.56497e-07	0.000205149
	ENSMUSG00000034919.2	Ttc22	0	0.178416	0.240248	0	0.034416	0	1.08924	8.39174	0.208157	1.12691	0.104666	1.94471	1.41452	34.8151	3.62551e-09	2.28589e-06
	ENSMUSG00000020191.11	Spata48	1.20663	0.054209	0.454793	0	0.334891	0.943895	0.376639	6.80429	5.44744	1.73587	0.428908	2.78143	1.40402	14.2401	0.000160907	0.017877
	ENSMUSG00000107568.1	Gm18840	0	0	0	0	0	0	0	8.11494	0	0.90166	0	1.62299	1.39121	20.499	5.96611e-06	0.00120213
	ENSMUSG00000106568.1	Gm42814	0	0.309625	0	0	0	0	0	9.00768	0	1.03526	0.0774062	1.80154	1.37866	14.0703	0.000176103	0.0188671
	ENSMUSG00000074903.5	Gm2058	0	0	0	0	0	0	0	7.80505	0	0.867228	0	1.56101	1.35671	22.1784	2.48459e-06	0.000569648
	ENSMUSG00000063586.1	Gm5513	0	0	0	0.184383	0	0.085988	0	8.14441	0	0.934976	0.0460957	1.64608	1.33884	28.6819	8.52968e-08	3.36123e-05
	ENSMUSG00000078154.3	Gm12184	0	0	0	0.333186	0	0	0	8.57264	0	0.989536	0.0832965	1.71453	1.32527	25.4024	4.65336e-07	0.000137358
	ENSMUSG00000079620.13	Muc4	0.047993	0	0.069774	0.020808	0.854522	0.751507	3.08145	0	3.26847	0.899392	0.0346438	1.59119	1.32448	31.237	2.28368e-08	1.04717e-05
	ENSMUSG00000079460.11	4933403O08Rik	0.812389	0	0.060548	0.423603	0.105113	0.328554	0.594321	9.94788	0.454	1.41405	0.324135	2.28597	1.31127	14.1426	0.000169458	0.0182639
	ENSMUSG00000105928.1	Gm9256	0	0.210822	0	0.164558	0	0.157629	0.406275	7.53411	0.184645	0.962004	0.093845	1.65653	1.28014	23.1136	1.52704e-06	0.000360315
	ENSMUSG00000037130.4	H2-M10.6	0	0	0	0	0	0	0.128049	6.98311	0	0.790129	0	1.42223	1.27634	39.4055	3.44324e-10	3.33995e-07
	ENSMUSG00000070524.1	Fcrlb	0.099302	0	0	0.518197	0.229089	0	0	8.72846	0	1.06389	0.154375	1.79151	1.27393	20.1864	7.0249e-06	0.00138412
	ENSMUSG00000109894.1	Gm5904	0	0.337456	0	0	0	0	0	8.06813	0	0.933954	0.084364	1.61363	1.2692	19.2386	1.15354e-05	0.00209745
	ENSMUSG00000046782.14	Ttc6	0	0.139192	0.451522	0.016276	0.452695	0.438388	3.84293	1.36761	2.64545	1.03934	0.151748	1.74941	1.2553	18.8632	1.40436e-05	0.00249422
	ENSMUSG00000082318.3	Gm14162	0	0.541094	0	0	0	0	0	7.5892	0.817509	0.9942	0.135273	1.68134	1.23992	13.1402	0.00028903	0.0280359
	ENSMUSG00000043003.14	Rasef	0.084618	0.503656	0.519155	0.102816	0.042211	0.592613	3.57948	2.91364	3.23504	1.28591	0.302561	2.0726	1.23811	15.3476	8.94356e-05	0.0112778
	ENSMUSG00000093973.1	Mrgpra2a	0	0	0.000425	0.000393	0.398648	0	0	6.39615	0	0.755068	0.0002045	1.35896	1.23786	35.981	1.99247e-09	1.43572e-06
	ENSMUSG00000057886.5	Cbx3-ps6	0	0	0	0	0.785592	0	2.458	0	3.42686	0.741161	0	1.33409	1.22286	16.2264	5.62067e-05	0.00774677
	ENSMUSG00000091736.3	Yy2	0	0	0.740445	0.519547	1.74664	1.73138	0.838905	5.83505	0.005202	1.26857	0.314998	2.03144	1.20494	14.4428	0.000144477	0.0165198
	ENSMUSG00000050650.7	Mrgpra1	0	0.076209	0	0.106315	0	0	0	6.75627	0.228763	0.796395	0.045631	1.39701	1.19686	24.2024	8.67229e-07	0.000230226
	ENSMUSG00000108011.1	Gm44596	0	0	0.001102	0	3.09919	0	3.06329	0	0	0.684842	0.0002755	1.2325	1.15826	19.5715	9.69062e-06	0.00180879
	ENSMUSG00000082174.1	Gm14877	0	0	0	0	0	0	0	6.1329	0	0.681433	0	1.22658	1.15483	16.1845	5.74622e-05	0.00779138
	ENSMUSG00000031410.14	Nxf7	0	0.198497	0.369813	0.479356	0	0.459999	6.88549	0	1.69318	1.1207	0.261916	1.80773	1.15379	12.0978	0.000504815	0.0425801
	ENSMUSG00000081633.1	Gm8522	0	0.038143	0	0.160185	0.146536	0.201343	0.271909	5.03925	0.994738	0.761345	0.049582	1.33076	1.15098	28.0914	1.1572e-07	4.29185e-05
	ENSMUSG00000027376.15	Prom2	3.20429	0.423295	0.352557	0.091342	0.384395	1.91512	7.88125	1.49991	5.7193	2.38572	1.01787	3.48	1.15066	12.6991	0.000365833	0.0334287
	ENSMUSG00000083816.3	Gm13033	0	0	0.283774	0.110347	0.390529	0.206219	0.459527	6.08211	0	0.836945	0.0985302	1.42768	1.144	18.8362	1.4244e-05	0.00249468
	ENSMUSG00000032191.5	Bcl2l10	0	0.197665	0	0	0	0.085811	0.305637	6.1928	0	0.753546	0.0494163	1.31685	1.14258	23.1116	1.52869e-06	0.000360315
	ENSMUSG00000078611.3	Gm5901	0	0	0	0	0	0	0	6.01209	0	0.66801	0	1.20242	1.13909	32.6281	1.11591e-08	5.86316e-06
	ENSMUSG00000094806.2	Cyp2d10	0	0.635814	0.127191	0	0	0	0.370731	6.48598	0.964232	0.953772	0.190751	1.56419	1.10663	14.7247	0.000124404	0.0145253
	ENSMUSG00000092167.8	Gm3696	0	0.460461	0	0	4e-06	0	0	5.55507	1.40959	0.825014	0.115115	1.39293	1.10159	29.5162	5.54513e-08	2.41117e-05
	ENSMUSG00000116378.1	Gcat	0.832882	0	0	0	1.24614	0.671679	0	4.55321	1.43559	0.971056	0.208221	1.58132	1.09523	16.4095	5.10284e-05	0.00716072
	ENSMUSG00000111620.1	AC118733.1	0.212159	0.066092	0.237355	0	0	0.172153	0.153294	6.65519	0	0.832916	0.128902	1.39613	1.08579	17.6178	2.70047e-05	0.00417828
	ENSMUSG00000067006.12	Serpinb5	0.136087	0.314255	0.331694	0.039368	0	0.292199	2.21139	2.91267	2.31329	0.950106	0.205351	1.54591	1.07873	14.2163	0.000162956	0.0179465
	ENSMUSG00000032013.6	Trim29	0.124981	0.077385	0.387613	0.072299	0	0.268227	4.6182	1.42577	0.887805	0.873587	0.16557	1.44	1.06585	15.9689	6.43908e-05	0.00850228
	ENSMUSG00000109384.1	Gm17931	0	0	0	0	0	0.216114	0	5.10005	0	0.590685	0	1.06323	1.04491	19.7925	8.6319e-06	0.00164364
	ENSMUSG00000094076.7	Gm4767	0	0	0	0	0	0.420228	0	4.85073	0	0.585662	0	1.05419	1.03857	57.6964	3.05856e-14	7.01244e-11
	ENSMUSG00000042269.15	Fam92b	0	0.136394	0	0	0.252604	0.236994	0.158219	4.86092	0	0.627237	0.0340985	1.10175	1.02322	22.161	2.50718e-06	0.00056965
	ENSMUSG00000111969.1	Gm9129	0	0.311388	0.160099	0	0.05499	0	0	6.24062	0	0.7519	0.117872	1.25912	1.01501	17.4902	2.88788e-05	0.00436122
	ENSMUSG00000054003.13	Tdrd9	1.44318	0.243003	0.269793	0.322421	0.714203	0.40082	0.646494	7.09967	1.87526	1.44609	0.569599	2.14729	1.00371	14.4428	0.000144483	0.0165198
	ENSMUSG00000091043.1	Glyatl3	0	0.204544	0	0.142364	0.378221	0.133455	0.476562	4.24158	0.615077	0.687978	0.086727	1.16898	0.997027	14.7455	0.000123038	0.0144786
	ENSMUSG00000009670.11	Tex11	0.138174	0.128243	0.077103	0.119863	0.529055	0.426016	0.221843	3.86269	0.54359	0.671842	0.115846	1.11664	0.923637	16.3027	5.39868e-05	0.00752236
	ENSMUSG00000079263.8	Gm6614	0	0	0	0	0	0.078816	0.086916	4.27238	0.045371	0.498165	0	0.896697	0.923489	41.4817	1.18981e-10	1.30465e-07
	ENSMUSG00000107705.1	Gm45062	0	0	0	0	0	0	0	2.08844	2.24269	0.481237	0	0.866226	0.900124	56.32	6.15865e-14	1.19478e-10
	ENSMUSG00000040969.14	Arhgef38	0.130548	0.401178	0.098238	0.068254	0.186719	0.535839	2.78557	0.828354	1.55843	0.73257	0.174555	1.17898	0.891541	14.3644	0.00015062	0.0169582
	ENSMUSG00000076439.12	Mog	0	0.336192	0.369741	0.465282	0.108851	0.057277	0.407337	6.02852	0.263814	0.893002	0.292804	1.37316	0.876306	13.1124	0.000293349	0.0282376
	ENSMUSG00000039492.7	Ccdc27	0	0.208998	0.250972	0	0.088508	0.045747	0.160954	4.90229	0	0.628608	0.114992	1.0395	0.871181	16.0361	6.21456e-05	0.00826719
	ENSMUSG00000056293.12	Gsdmc2	0	1e-06	0.546823	0	0.173293	0	0	4.9637	0.20604	0.654429	0.136706	1.06861	0.8638	15.0016	0.000107419	0.0129005
	ENSMUSG00000028148.11	Them5	0	0	0	0.356735	0	0	0	4.8798	0	0.581837	0.0891838	0.97596	0.859306	16.4066	5.11074e-05	0.00716072
	ENSMUSG00000024039.14	Cbs	0	0.920677	1.07824	0.539421	0.257918	0.282311	2.26921	6.52587	0.162626	1.33736	0.634584	1.89959	0.826923	13.3713	0.000255498	0.0255701
	ENSMUSG00000111306.2	Olfr1065	0	0.136075	0.170198	0.095128	0.172179	0.181045	0.455318	3.74977	0.153214	0.568103	0.10035	0.942305	0.819807	16.1863	5.7408e-05	0.00779138
	ENSMUSG00000075359.2	Gm20775	0	0	0	0	0	0	0	3.79905	0	0.422117	0	0.75981	0.81542	34.4317	4.41472e-09	2.65093e-06
	ENSMUSG00000095690.1	Rab11b-ps2	0	4.2e-05	0	0	0	0	3.78174	0	0	0.420198	1.05e-05	0.756348	0.812564	14.151	0.000168707	0.0182609
	ENSMUSG00000011034.6	Slc5a1	0	0.083217	0.060067	0.093375	0.020603	0.497338	2.83902	0	0.871224	0.496094	0.0591648	0.845637	0.801192	21.2854	3.95736e-06	0.000867866
	ENSMUSG00000115954.1	LT629151.3	0	0	0	0	0	0	0	3.68291	0	0.409212	0	0.736582	0.796251	25.3898	4.6839e-07	0.000137358
	ENSMUSG00000023443.13	Esx1	0.152617	0.094813	0.056856	0.066307	0.058594	0	0.219397	4.08258	0	0.525685	0.0926483	0.872114	0.776839	15.6277	7.71156e-05	0.00997362
	ENSMUSG00000089775.1	Gm16270	0.45086	0	0	0.240685	0.053117	0	0	3.54525	1.38048	0.630044	0.172886	0.995769	0.766882	13.1299	0.000290621	0.0280823
	ENSMUSG00000029188.14	Slc34a2	1.29675	0.130709	0.235873	0.045834	0.040452	0.711527	1.26164	4.66899	0.415407	0.978576	0.427291	1.4196	0.76149	19.5289	9.90901e-06	0.00182413
	ENSMUSG00000109112.1	Gm44544	0.129469	0.241027	0.241066	0	0	0	0.046436	4.69166	0	0.594406	0.152891	0.947619	0.756456	11.9415	0.000548962	0.0456925
	ENSMUSG00000103260.1	Gm8146	0	0	0	0	0	0	0	3.18987	0	0.35443	0	0.637974	0.711912	31.6785	1.81923e-08	9.05502e-06
	ENSMUSG00000091930.1	Vmn2r52	0.134447	0.138786	0	0	0.103025	0.144329	0.032036	3.30233	0.041541	0.432944	0.0683083	0.724652	0.690977	17.8579	2.38026e-05	0.00380951
	ENSMUSG00000090726.4	Gm17421	0	0	0	0	1.84105	0	1.22795	0	0	0.341	0	0.6138	0.690462	12.7778	0.000350755	0.0326422
	ENSMUSG00000038259.4	Gdf5	0	0.309547	0.074372	0	0	0	0.035741	3.62629	0.046335	0.454698	0.0959798	0.741673	0.668253	13.3552	0.000257707	0.0256141
	ENSMUSG00000020159.8	Gabrp	0	0.063488	0.178131	0	0	0.247507	1.39108	0	1.78448	0.407187	0.0604048	0.684613	0.667803	13.2398	0.000274062	0.0267901
	ENSMUSG00000067724.5	Gbx1	0.064289	0.178963	0.047828	0.223055	0.221506	0.465097	0.366843	2.60912	0.297456	0.497129	0.128534	0.792004	0.667125	12.5252	0.000401507	0.0359078
	ENSMUSG00000022435.6	Upk3a	0	0	0.090604	0	0.187004	0	2.55099	0	0.227408	0.339556	0.022651	0.59308	0.639505	13.9423	0.000188506	0.0195643
	ENSMUSG00000046793.8	Gpr61	0.090537	0.076282	0	0.106907	0.094389	0.0661	0.352064	2.50849	0.139597	0.381596	0.0684315	0.632128	0.61126	15.4708	8.37878e-05	0.0106724
	ENSMUSG00000103124.1	Gm37389	0	0.247269	0	0	0.356146	0	0	2.59706	0	0.355608	0.0618172	0.590641	0.583073	12.4258	0.000423451	0.0374717
	ENSMUSG00000116379.1	LT629154.16	0	0	0	0	0	0	0.291344	0	1.99511	0.25405	0	0.457291	0.543289	13.9559	0.000187152	0.0195273
	ENSMUSG00000030004.6	Nat8	0	0	0	0	0	0.095328	1.3589	0	0.658804	0.234781	0	0.422606	0.508537	15.5228	8.15179e-05	0.0104359
	ENSMUSG00000055333.14	Fat2	0	0.031709	0.043648	0.00636	0	0.123515	1.50656	0	0.528057	0.248872	0.0204292	0.431626	0.488479	28.3697	1.0022e-07	3.77247e-05
	ENSMUSG00000041044.9	Lrit1	0.076391	0.015769	0.018958	0.066267	0.194881	0.122734	0.145244	1.60111	0.235672	0.275225	0.0443462	0.459928	0.483297	18.3024	1.88467e-05	0.00314777
	ENSMUSG00000060827.2	Olfr1193	0	0.050011	0	0.109503	0.098032	0	0.180994	1.69139	0.039911	0.241093	0.0398785	0.402065	0.431139	15.1316	0.000100273	0.0122854
	ENSMUSG00000020481.15	Ankrd36	0	0	0	0.061936	0	0	0.153598	1.68137	0	0.210767	0.015484	0.366994	0.428839	28.5478	9.14155e-08	3.54692e-05
	ENSMUSG00000054746.18	Abca15	0	0	0.015186	0.053112	0	0	0.029072	1.67042	0.07581	0.204844	0.0170745	0.35506	0.413932	24.9417	5.90906e-07	0.000167445
	ENSMUSG00000116252.1	MF597757.1	0	0	0	0	0.972106	1e-06	0	0	0.606364	0.175386	0	0.315694	0.395824	22.6947	1.89889e-06	0.000443426
	ENSMUSG00000109564.1	Muc16	0	0.03446	0.051861	0.012092	0.006316	0.098018	0.86781	0.231577	0.529001	0.203459	0.0246033	0.346544	0.394196	20.6343	5.55922e-06	0.00114921
	ENSMUSG00000114473.1	AC116797.1	0	0	0	0	0	0	0	1.56391	0	0.173768	0	0.312782	0.392627	33.5243	7.03779e-09	4.11332e-06
	ENSMUSG00000104831.1	B020017C02Rik	0	0	0	0	0.206934	0.450215	0.2298	0	0.330406	0.135262	0	0.243471	0.314373	14.9004	0.000113338	0.0135468
	ENSMUSG00000070375.7	Olfr406	0.159801	0	0	0	0	0	0	1.38854	0	0.172038	0.0399502	0.277708	0.297044	12.2698	0.000460356	0.0398088
	ENSMUSG00000116073.1	LT629150.1	0	0	0.021247	0	0.083698	0.048003	0	0	0.729431	0.0980421	0.00531175	0.172226	0.221608	14.3672	0.0001504	0.0169582
	ENSMUSG00000021604.15	Irx4	0	0	0	0	0	0.156156	0.485344	0	0.089893	0.0812659	0	0.146279	0.196958	14.0257	0.000180332	0.0191092
	ENSMUSG00000046991.10	Wdr27	0	4.05469	1.71001	0.077285	0.271335	0.552951	0.190975	5.41672	2.41065	1.63162	1.4605	1.76853	0.170169	11.869	0.000570746	0.0470399
	ENSMUSG00000098754.7	Prn	0	0	0	0.465016	0	0	0	0	0	0.0516684	0.116254	0	-0.158665	20.001	7.74023e-06	0.00151324
	ENSMUSG00000045330.8	4933402E13Rik	0	0.419077	0.182937	0	0	0	0.044028	0	0	0.0717824	0.150504	0.0088056	-0.189617	12.2675	0.000460911	0.0398088
	ENSMUSG00000032852.3	Rspo4	0	0.574029	0	0	0	0	0	0	0	0.063781	0.143507	0	-0.193466	20.4863	6.00589e-06	0.00120213
	ENSMUSG00000025215.10	Tlx1	0.512239	0	0	0.098834	0	0	0	0	0	0.067897	0.152768	0	-0.205103	15.254	9.39756e-05	0.0116752
	ENSMUSG00000112920.1	Spata22	0	0.686726	0	0	0	0	0	0	0	0.0763029	0.171681	0	-0.22858	13.9642	0.000186324	0.0195273
	ENSMUSG00000027577.14	Chrna4	2.41898	0.513184	0.035777	0.020856	0.055218	0	0.051395	2.34736	0	0.604752	0.747199	0.490795	-0.228963	17.8529	2.38661e-05	0.00380951
	ENSMUSG00000023070.6	Rgn	0.607353	0	0	0.131935	0	0	0	0	0	0.0821431	0.184822	0	-0.24467	14.1546	0.000168382	0.0182609
	ENSMUSG00000022868.5	Ahsg	0	0.522678	0.31328	0	0	0	0	0	0.078337	0.101588	0.208989	0.0156674	-0.251374	12.1973	0.000478579	0.0409145
	ENSMUSG00000034871.2	Fam151a	0	0.123422	0.644933	0.057739	0	0.060046	0	0	0	0.09846	0.206523	0.0120092	-0.253634	14.3216	0.00015409	0.0172718
	ENSMUSG00000084347.3	Akt2-ps	0	0.230012	0.553173	0	0	0	0	0	0	0.0870206	0.195796	0	-0.257972	16.1471	5.86081e-05	0.00790426
	ENSMUSG00000052131.7	Akr1b7	0	0.620077	0	0.17323	0	0	0	0	0	0.0881452	0.198327	0	-0.261021	15.0843	0.000102816	0.0125266
	ENSMUSG00000096719.1	Mrgpra2b	0	0.194866	0.466174	0.18102	0	0	0	0	0	0.0935622	0.210515	0	-0.275621	14.4319	0.00014532	0.0165198
	ENSMUSG00000059832.4	Kprp	0.79345	0	0.155391	0	0	0	0.059673	0	0	0.112057	0.23721	0.0119346	-0.289975	16.9297	3.87897e-05	0.00566161
	ENSMUSG00000025468.15	Caly	0	0.175974	0.487162	0.245259	0	0	0	0	0	0.100933	0.227099	0	-0.295251	13.4751	0.00024175	0.0244857
	ENSMUSG00000019936.10	Epyc	0	0.912671	0.156432	0	0	0.113078	0.050259	0	0	0.136938	0.267276	0.0326674	-0.295355	12.3243	0.0004471	0.039113
	ENSMUSG00000040972.8	Igsf21	0.059723	1.03721	0.044473	0	0	0.048175	0	0	0.055469	0.138339	0.285351	0.0207288	-0.332563	17.7219	2.55672e-05	0.00403003
	ENSMUSG00000055827.13	Gsdmc3	0	0.81349	0	0.232112	0	0	0	0	0	0.116178	0.2614	0	-0.335026	27.0982	1.93381e-07	6.59064e-05
	ENSMUSG00000096271.1	Ccl21b	0	0	1.07684	0	0	0	0	0	0	0.119649	0.26921	0	-0.343931	12.1303	0.000496091	0.0419846
	ENSMUSG00000031936.9	Hephl1	0	1.2292	0.092457	0	0.079269	0.099794	0.059002	0	0	0.173302	0.330414	0.047613	-0.34477	17.7264	2.55058e-05	0.00403003
	ENSMUSG00000111942.1	Gm5182	0	1.01635	0.066962	0.053176	0	0.048733	0	0	0	0.131691	0.284122	0.0097466	-0.346789	35.0267	3.25213e-09	2.10305e-06
	ENSMUSG00000102735.1	Gm7369	0	0.836553	0.332894	0	0	0	0	0	0	0.129939	0.292362	0	-0.37001	15.0265	0.00010601	0.0127923
	ENSMUSG00000058447.8	Gm26920	0	0.29128	0.893758	0	0	0	0	0	0	0.131671	0.29626	0	-0.374355	30.4358	3.45095e-08	1.52689e-05
	ENSMUSG00000082334.1	Gm13244	1.11819	0.053828	0	0.075416	0.009666	0.018695	0	0	0.016544	0.143593	0.311858	0.008981	-0.378713	15.1301	0.000100348	0.0122854
	ENSMUSG00000029155.16	Spata18	0.606613	0.516146	0.16268	0	0	0	0.062402	0	0	0.14976	0.32136	0.0124804	-0.384129	18.2864	1.9006e-05	0.00315349
	ENSMUSG00000115493.1	AC140799.1	0	0.236993	0.987694	0	0	0	0	0	0	0.136076	0.306172	0	-0.385345	12.3158	0.000449141	0.039113
	ENSMUSG00000093485.1	Gm20708	0	0	0.9523	0.282436	0	0	0.001105	0	0	0.137316	0.308684	0.000221	-0.387798	24.6672	6.8135e-07	0.000188831
	ENSMUSG00000022101.6	Fgf17	1.04072	0.088968	0.070537	0.164541	0.05499	0	0	0	0	0.157751	0.341191	0.010998	-0.407735	14.1788	0.000166234	0.018149
	ENSMUSG00000053830.4	Gm9923	1.33532	0	0	0	0	0	0	0	0	0.148369	0.33383	0	-0.415575	24.0028	9.61955e-07	0.000247556
	ENSMUSG00000081767.1	Gm12067	1.14099	0.284574	0	0	0	0	0.082558	0	0	0.167569	0.356391	0.0165116	-0.416146	12.4757	0.00041228	0.036741
	ENSMUSG00000089703.1	Gm15833	0	0.18042	1.40041	0	0	0.11764	0	0	0	0.188719	0.395207	0.023528	-0.446929	12.5878	0.000388271	0.034971
	ENSMUSG00000109178.1	Gm3257	0	0.746725	0.709135	0	0	0	0	0	0	0.161762	0.363965	0	-0.447807	12.1791	0.000483271	0.041176
	ENSMUSG00000073380.1	Arrdc5	0	0.079413	1.42409	0	0	0	0	0	0	0.167056	0.375876	0	-0.46035	18.9541	1.339e-05	0.00241212
	ENSMUSG00000109926.1	Gm45808	0	0	1.51564	0	0	0	0	0	0	0.168404	0.37891	0	-0.463528	14.26	0.000159213	0.017767
	ENSMUSG00000027359.16	Slc27a2	0	2.23069	0.374722	0	0.064377	0.531835	0.296829	0	0.078082	0.397393	0.651353	0.194225	-0.467574	12.7155	0.000362637	0.0333785
	ENSMUSG00000116268.1	LT629154.11	1.6363	0	0	0	0	0	0	0	0	0.181811	0.409075	0	-0.494748	17.5957	2.73202e-05	0.00420132
	ENSMUSG00000090461.2	Iltifb	0	0	0	1.68299	0	0	0	0	0	0.186999	0.420747	0	-0.50665	12.9666	0.000317102	0.0302929
	ENSMUSG00000074637.7	Sox2	0	1.80786	0.595908	0.049635	0.04384	0.230488	0.204762	0	0.159228	0.343525	0.613351	0.127664	-0.516723	12.3133	0.000449753	0.039113
	ENSMUSG00000019932.8	Kera	0	0	1.85781	0	0	0	0	0	0	0.206423	0.464452	0	-0.550361	37.3979	9.63274e-10	7.8367e-07
	ENSMUSG00000035964.8	Tmem59l	1.86765	0	0	0	0	0	0	0	0	0.207517	0.466913	0	-0.552783	13.0491	0.000303431	0.0290971
	ENSMUSG00000031576.16	Kcnu1	0	0.724554	1.1815	0.07477	0	0	0	0	0	0.220092	0.495206	0	-0.580344	18.6764	1.54888e-05	0.00263937
	ENSMUSG00000037827.5	Gm5884	0	0	0	2.17507	0	0.060133	0	0	1e-06	0.248356	0.543767	0.0120268	-0.609208	24.1536	8.89514e-07	0.000233683
	ENSMUSG00000012187.13	Mogat1	0	4.17486	0.414237	0	1.23105	0	0.40809	0	0.348901	0.730793	1.14727	0.397608	-0.619546	12.1368	0.000494355	0.0419786
	ENSMUSG00000028801.14	Stpg1	0	0.744638	0.485421	1.43404	0	0	0.058918	0	0.312413	0.33727	0.666025	0.0742662	-0.633058	13.2877	0.000267154	0.0263188
	ENSMUSG00000030158.12	Clec12b	1.51515	1.06083	0.070601	0.082346	0	0	0.068286	0	0.353459	0.350075	0.682232	0.084349	-0.633547	15.6912	7.45713e-05	0.00969427
	ENSMUSG00000052396.7	Mogat2	0	2.30927	0.050215	0	0	0	0.096765	0	0	0.272917	0.589871	0.019353	-0.641256	21.0503	4.47388e-06	0.000948162
	ENSMUSG00000082031.1	Gm8097	1.22758	0.329927	1.04853	0	0	0.143565	0	0	0	0.305511	0.651509	0.028713	-0.682945	15.2704	9.3165e-05	0.0116318
	ENSMUSG00000035963.8	Odf3l2	0	0.448339	2.45401	0	0	0.166814	0.074258	0	0.096061	0.359942	0.725587	0.0674266	-0.692951	17.6704	2.62686e-05	0.00408947
	ENSMUSG00000060816.3	Vmn1r52	2.39808	0.076343	0.122347	0.043633	0	0	0.058724	0	0.038079	0.304134	0.660101	0.0193606	-0.703606	14.0655	0.000176552	0.0188671
	ENSMUSG00000046240.8	Hepacam	0.334667	2.94017	1.09555	0.116121	0.076879	0.107625	0.978929	0	0.154873	0.644979	1.12163	0.263661	-0.747561	12.399	0.000429558	0.0377472
	ENSMUSG00000074695.3	Il22	0	0	0	3.30777	0.275012	0	0	0	0	0.398087	0.826943	0.0550024	-0.792185	18.1886	2.00078e-05	0.00325546
	ENSMUSG00000051839.7	Gypa	0.516591	2.28404	0.86568	0	0.049545	0.052121	0.324236	0	0	0.45469	0.916578	0.0851804	-0.820598	21.8695	2.91835e-06	0.000657149
	ENSMUSG00000042041.6	2010003K11Rik	0	3.42159	0.501364	0	0	0.18192	0.405093	0	0	0.501107	0.980738	0.117403	-0.825889	17.1915	3.37951e-05	0.0050136
	ENSMUSG00000096582.1	Gm13289	3.21175	0	0	0	0	0	0	0	0	0.356861	0.802937	0	-0.850349	13.8359	0.000199487	0.0205492
	ENSMUSG00000037537.6	H2-M11	0.675607	2.27944	0.706158	0.235377	0.10415	0	0.196265	0	0.126773	0.480419	0.974145	0.0854376	-0.862952	18.2006	1.98819e-05	0.00325546
	ENSMUSG00000002588.12	Pon1	0	2.74818	0.61006	0	0	0	0	0	0	0.373138	0.83956	0	-0.879361	32.6476	1.10477e-08	5.86316e-06
	ENSMUSG00000109290.1	Phgdh-ps1	0	2.9021	0.75065	0.702952	0.157352	0	0.442296	0	0	0.550594	1.08893	0.11993	-0.899353	14.4478	0.000144097	0.0165198
	ENSMUSG00000061718.12	Ppp1r1b	0	6.6262	1.24829	0.094807	0.298487	0.158281	1.11442	0	1.06033	1.17787	1.99232	0.526304	-0.971225	12.9277	0.000323747	0.0307315
	ENSMUSG00000113084.1	A030003K21Rik	3.67656	0.014677	0.019641	1.75871	0	0	0	0.090846	0.518452	0.675432	1.3674	0.12186	-1.07741	16.6953	4.3889e-05	0.00631335
	ENSMUSG00000029195.10	Klb	0.315122	6.15755	1.5238	0.081998	0.386027	0.202628	1.03382	0	0.262423	1.10704	2.01962	0.37698	-1.13286	16.1128	5.96802e-05	0.00800603
	ENSMUSG00000099009.1	Rdh16f1	3.4723	0	5.59006	0	0.001295	0	2.40029	0	4e-06	1.27377	2.26559	0.480318	-1.14144	12.9077	0.000327238	0.0308208
	ENSMUSG00000027409.5	1700020A23Rik	4.58622	2.30781	0.653763	0.190834	0.338467	0.359559	0.321831	0	0.621636	1.04224	1.93466	0.328299	-1.14361	12.2131	0.00047454	0.0407071
	ENSMUSG00000100679.1	Gm28778	0	1.96786	2.92545	0	0	0	0	0	0	0.543701	1.22333	0	-1.15272	31.6282	1.86701e-08	9.05502e-06
	ENSMUSG00000080763.2	Gm12341	3.5049	0.248801	1.76427	0	0.305064	0	0	0	0	0.647004	1.37949	0.0610128	-1.16521	14.0125	0.000181596	0.0191625
	ENSMUSG00000107872.2	Gm44511	6.7941	0.408107	0	0.504553	0	0	0.2359	0	1.17252	1.0128	1.92669	0.281684	-1.19123	12.7019	0.000365293	0.0334287
	ENSMUSG00000098387.2	Pet117	5.13954	0	0	0	0	0	0	0	0	0.57106	1.28489	0	-1.19212	25.5709	4.26421e-07	0.00012957
	ENSMUSG00000020295.1	Hbq1a	0	4.69484	1.69355	0	0.670673	0	0	0	0	0.78434	1.5971	0.134135	-1.19531	16.8755	3.99139e-05	0.00578522
	ENSMUSG00000081731.1	Calr-ps	0	0.267424	4.70619	0.366903	0	0	0	0	0	0.593391	1.33513	0	-1.2235	19.8214	8.50267e-06	0.00163693
	ENSMUSG00000030244.7	Gys2	0	9.32025	0.832091	0.111948	0.131793	0.311527	2.08965	0	0	1.42192	2.56607	0.506594	-1.24305	15.8691	6.78793e-05	0.00887003
	ENSMUSG00000021278.7	Amn	6.3083	0.247416	0.394268	0.574941	0.101752	0.401768	0.102045	0	0.371485	0.944664	1.88123	0.19541	-1.26918	13.2501	0.00027256	0.0267469
	ENSMUSG00000112022.1	Gm2436	0	0.053367	0.07639	6.78153	0	0.062761	0.055052	0	0.156466	0.798396	1.72782	0.0548558	-1.3707	26.7377	2.33036e-07	7.63269e-05
	ENSMUSG00000054957.5	Gm9959	4.01941	0.88036	1.52597	0	0	0	0	0	0	0.713971	1.60644	0	-1.38208	14.8212	0.000118201	0.014024
	ENSMUSG00000116444.1	LT629152.10	6.46231	0	0.007331	0	0	0	0	0	0	0.718849	1.61741	0	-1.38814	44.8421	2.13581e-11	2.83501e-08
	ENSMUSG00000116471.1	LT629149.9	6.46238	0	0.007331	0	0	0	0	0	0	0.718857	1.61743	0	-1.38815	44.8423	2.13559e-11	2.83501e-08
	ENSMUSG00000060726.10	Tmsb15a	2.69662	0	0	3.82062	0	0	0	0	0	0.724138	1.62931	0	-1.39468	15.2337	9.49949e-05	0.011744
	ENSMUSG00000078162.6	Gm2574	3.13443	1.99391	3.77861	0.777701	0	0.242284	1.00386	0	0	1.21453	2.42116	0.249229	-1.45345	20.8821	4.88434e-06	0.00102652
	ENSMUSG00000026621.13	Marc1	0	9.31226	1.33271	0.050131	0.124979	0.33666	1.04911	0	0.05361	1.36216	2.67378	0.312872	-1.48454	23.2569	1.41744e-06	0.000340456
	ENSMUSG00000111244.1	Gm47130	4.66672	0	0	2.82916	0	0	0	0	0	0.832876	1.87397	0	-1.52305	11.9801	0.000537723	0.0449052
	ENSMUSG00000041653.5	Pnpla3	5.55185	190.551	48.6407	26.2914	18.6236	41.7582	40.4628	3.19583	8.90275	42.6642	67.7587	22.5886	-1.54345	19.7846	8.66789e-06	0.00164364
	ENSMUSG00000089665.2	Fcor	0	10.425	2.51077	0	0.527034	0	1.05181	0	0.665457	1.68667	3.23394	0.44886	-1.54708	12.757	0.000354689	0.0327665
	ENSMUSG00000024747.3	Aldh1a7	0	12.1789	1.48431	0	0.087248	0.229347	1.9967	0	0.053085	1.78107	3.4158	0.473276	-1.58365	21.7129	3.16651e-06	0.000700521
	ENSMUSG00000108815.1	AC149222.1	8.97958	0	1.0901	0.005943	0.293934	0	0.575148	0	0	1.21608	2.51891	0.173816	-1.58392	31.3798	2.12181e-08	1.00966e-05
	ENSMUSG00000103392.1	Gm38303	7.14863	0	0.929851	0	0	0	0	0	0	0.897609	2.01962	0	-1.59437	26.4899	2.64914e-07	8.45714e-05
	ENSMUSG00000050058.6	Prm3	7.13174	0.775931	0.450155	2.10782	0	0	0	0.294827	0.615138	1.26396	2.61641	0.181993	-1.61334	13.4531	0.000244607	0.024676
	ENSMUSG00000087642.3	Ighe	3.68077	0	0.342993	10.9612	0.778019	0.223601	0.428488	0	1.20169	1.95742	3.74624	0.52636	-1.63669	18.869	1.40008e-05	0.00249422
	ENSMUSG00000076512.2	Igkv9-123	6.56798	1.92731	0.555163	1.29959	0	0	0	0	0.739026	1.23212	2.58751	0.147805	-1.64411	13.9536	0.000187375	0.0195273
	ENSMUSG00000059201.12	Lep	0	12.2924	1.25559	0.179258	0.079122	0.967803	0.933864	0	0.095641	1.75596	3.43181	0.415286	-1.6468	25.765	3.85622e-07	0.000120066
	ENSMUSG00000059461.7	Gm7331	8.28717	0	3.47572	2.38135	0	0	0	0	2.15349	1.81086	3.53606	0.430698	-1.66472	12.8703	0.000333835	0.0312986
	ENSMUSG00000113637.1	Gm7049	0	27.1541	10.0817	0.151826	0.931331	1.26327	6.53693	2.17494	0.283443	5.3975	9.34691	2.23798	-1.67603	12.7691	0.000352385	0.0326734
	ENSMUSG00000060459.13	Kng2	0	10.1074	0.12371	0.067447	0	0.134299	0.279011	0	0.077327	1.1988	2.57464	0.0981274	-1.70275	41.5161	1.16907e-10	1.30465e-07
	ENSMUSG00000022878.5	Adipoq	2.3992	67.6503	15.7853	1.20389	6.15795	5.11298	16.5305	0	1.32302	12.907	21.7597	5.82489	-1.7376	14.181	0.000166035	0.018149
	ENSMUSG00000078686.11	Mup9	0	8.23082	2.42139	0	0	0	0	0	0.312038	1.21825	2.66305	0.0624076	-1.78571	16.1876	5.73693e-05	0.00779138
	ENSMUSG00000051596.13	Otop1	1.12661	14.2606	1.73878	0.155441	0.259186	0.488291	1.4785	0	0.33178	2.20435	4.32036	0.511551	-1.81549	23.6694	1.14387e-06	0.000280082
	ENSMUSG00000083287.4	Gm13502	14.0511	3.98841	1e-06	1.69453	2.93058	0	0.446087	0	0.037991	2.57208	4.93351	0.682932	-1.81791	16.0319	6.22826e-05	0.00826719
	ENSMUSG00000025488.9	Cox8b	7.42181	179.834	265.612	5.88873	14.5635	26.9387	109.526	0	5.89112	68.4084	114.689	31.3839	-1.83691	11.7672	0.000602826	0.0493612
	ENSMUSG00000100743.1	Scgb1b25-ps	5.77937	4.52084	0	0	0	0	0	0	0	1.14447	2.57505	0	-1.83796	23.7007	1.1254e-06	0.000280082
	ENSMUSG00000030278.11	Cidec	0	68.7735	15.5322	1.312	3.01039	3.16741	19.7346	0.037238	0.065236	12.4036	21.4044	5.20297	-1.85275	13.3533	0.000257969	0.0256141
	ENSMUSG00000076545.2	Igkv4-72	11.204	0	0	4.41955	0	0	0.492118	0	1.24678	1.92916	3.90589	0.34778	-1.86393	15.5416	8.07103e-05	0.0103853
	ENSMUSG00000030747.5	Dgat2	10.6078	257.944	56.8978	10.4627	8.41768	18.7931	57.7269	10.8101	15.6951	49.7061	83.9781	22.2886	-1.86747	14.5725	0.000134867	0.0156744
	ENSMUSG00000041737.8	Tmem45b	0.813874	47.0215	5.52221	1.44431	1.54155	3.19639	3.60639	4.25797	2.34832	7.75028	13.7005	2.99012	-1.88136	11.8857	0.000565677	0.046775
	ENSMUSG00000049233.7	Apoo-ps	7.85052	0	9.31949	5.62326	0	0	0	0	3.99912	2.97693	5.69832	0.799824	-1.89594	18.718	1.51549e-05	0.00260004
	ENSMUSG00000081008.2	Gm13314	0	10.1921	10.878	1.81013	0.816514	0	0	0	3.12304	2.97998	5.72006	0.787911	-1.9102	13.8346	0.000199625	0.0205492
	ENSMUSG00000110439.1	Gm21320	0	8.59506	11.5205	0.290221	0	1.76889	0.971935	0	0	2.57185	5.10145	0.548165	-1.97859	23.9717	9.77634e-07	0.00024905
	ENSMUSG00000032401.15	Lctl	1.02591	26.0469	7.50298	0	0.090523	1.82272	5.06383	0	0.249639	4.64472	8.64395	1.44534	-1.97959	20.547	5.81842e-06	0.00118339
	ENSMUSG00000038754.4	Elovl3	0	12.2919	0	0	0	0	0	0	0.154158	1.3829	3.07298	0.0308316	-1.98227	57.8402	2.84294e-14	7.01244e-11
	ENSMUSG00000032418.15	Me1	2.274	244.503	60.1604	1.43547	3.70338	14.6896	42.7934	23.0594	8.1407	44.5288	77.0932	18.4773	-2.0034	12.0786	0.000510028	0.0428763
	ENSMUSG00000028976.10	Slc2a5	0	14.115	1.24983	0.254291	0.142816	0.151384	0.541345	0	0.065974	1.83563	3.90478	0.180304	-2.05503	36.3509	1.64799e-09	1.25946e-06
	ENSMUSG00000079297.4	Gm2223	15.7746	1.96284	15.7748	5.80542	0	0	0	0	7.96269	5.25337	9.82941	1.59254	-2.06252	19.559	9.75398e-06	0.00180879
	ENSMUSG00000039956.8	Mrap	3.00764	29.3191	7.10743	0.838869	1.96139	1.44017	3.07986	0	1.59903	5.37261	10.0683	1.61609	-2.08094	18.8494	1.41458e-05	0.00249468
	ENSMUSG00000083372.1	Gm11235	13.6768	0	0	0	0	0	0	0	0	1.51964	3.4192	0	-2.14379	17.671	2.62605e-05	0.00408947
	ENSMUSG00000023019.12	Gpd1	1.73607	247.629	69.6191	1.20443	5.25339	10.3242	58.2767	7.74904	3.32404	45.0129	80.0472	16.9855	-2.17193	14.8173	0.000118442	0.014024
	ENSMUSG00000076526.6	Igkv12-98	22.8319	2.44249	0.699456	21.2331	2.20703	0	3.05633	0	3.74762	6.24644	11.8017	1.8022	-2.19171	15.0424	0.000105121	0.0127459
	ENSMUSG00000037071.2	Scd1	88.3055	2190.27	338.813	82.7902	60.8261	104.327	330.656	143.813	71.6664	379.052	675.045	142.258	-2.23851	15.3098	9.12401e-05	0.0114481
	ENSMUSG00000044405.4	Adig	0	33.0098	11.9011	0.459362	0.20391	1.30344	4.38024	0	2.16392	5.93575	11.3426	1.6103	-2.24135	19.9019	8.15199e-06	0.00158149
	ENSMUSG00000024990.12	Rbp4	4.19672	87.3229	13.3193	1.04494	2.65955	4.03583	14.8728	0	1.97262	14.3805	26.471	4.70816	-2.26681	18.2667	1.92034e-05	0.00316543
	ENSMUSG00000042874.1	D930007J09Rik	8.86535	0	6.55085	0	0	0	0	0	0	1.71291	3.85405	0	-2.27919	27.4494	1.61258e-07	5.6485e-05
	ENSMUSG00000025153.9	Fasn	76.7477	1307.48	232.372	76.7368	72.9154	92.1013	162.032	47.7975	54.4196	235.845	423.334	85.8532	-2.28855	17.4396	2.96576e-05	0.00445217
	ENSMUSG00000056836.8	Gm6851	12.3902	3.40308	0	0	0	0	0	0	0	1.75481	3.94832	0	-2.30694	27.7696	1.3666e-07	4.99501e-05
	ENSMUSG00000069008.3	Gm5537	40.0114	0	11.1868	11.4275	0	0	0	10.5803	0.518931	8.19166	15.6564	2.21985	-2.37102	17.5221	2.83985e-05	0.00431452
	ENSMUSG00000094689.1	Ighv1-81	0	0	0.6765	16.5966	0	0	0	0	0	1.91923	4.31827	0	-2.41096	24.6313	6.94136e-07	0.000190284
	ENSMUSG00000107176.1	Gm9794	22.0757	0	3.60599	43.6688	5.08329	2.8708	0	0	2.42258	8.85857	17.3376	2.07533	-2.57599	20.6978	5.37786e-06	0.00112091
	ENSMUSG00000111027.1	Gm2981	14.5315	0	2.80744	2.74043	0	0	0	0	0	2.23104	5.01984	0	-2.58973	53.5114	2.57094e-13	4.63136e-10
	ENSMUSG00000035686.8	Thrsp	6.12661	438.351	63.194	5.71387	9.28522	20.7641	47.4392	11.7201	6.63187	67.6918	128.346	19.1681	-2.68109	21.1638	4.21662e-06	0.000916751
	ENSMUSG00000094661.1	Ccl19	0	0	23.8771	2.9e-05	0	0	0	0	0	2.65301	5.96928	0	-2.80101	27.6583	1.44751e-07	5.21519e-05
	ENSMUSG00000114277.1	Gm48583	2.55623	5.94346	14.6559	3.58854	0	0	0	0	0	2.97157	6.68603	0	-2.94224	14.0514	0.000177878	0.0189286
	ENSMUSG00000081201.1	Smt3h2-ps4	0	0	0.103415	29.3106	0	0	0	0	0	3.26822	7.3535	0	-3.06238	23.6803	1.1374e-06	0.000280082
	ENSMUSG00000056412.6	Gm12396	0	0	0	33.7263	0	0	0	0	0	3.74737	8.43158	0	-3.2375	28.9724	7.3416e-08	3.08592e-05
	ENSMUSG00000097221.1	1810049J17Rik	21.6678	0	13.5927	0	0	0	0	0	0	3.91783	8.81513	0	-3.29501	50.8175	1.01366e-12	1.59779e-09
	ENSMUSG00000113077.1	AC134254.1	14.3602	10.542	0	14.6737	0	0	0	0	0	4.39732	9.89397	0	-3.44546	12.4673	0.000414147	0.0367774
	ENSMUSG00000114941.1	Gm47779	0	0	40.991	0	0	0	0	0	0	4.55456	10.2477	0	-3.49156	12.4078	0.000427554	0.0377025
	ENSMUSG00000069622.4	Gm10273	0.021955	9.39531	47.5437	3.2e-05	0.486063	0.064055	1e-06	0	0	6.39012	14.2402	0.110024	-3.77922	72.3853	1.77024e-17	8.92911e-14
	ENSMUSG00000024526.8	Cidea	0	58.9993	0.334604	0	0	0	0	0	0.10488	6.60431	14.8335	0.020976	-3.95496	92.5684	6.50388e-22	1.64028e-17
	ENSMUSG00000114758.1	Gm48005	56.8077	0	0	4.14464	0	0	0	0	0	6.77248	15.2381	0	-4.02131	18.3319	1.85571e-05	0.00312007
	ENSMUSG00000031710.4	Ucp1	0	117.111	0	0.064597	0	0.120168	0.267106	0	1.10699	13.1855	29.2939	0.298853	-4.54372	80.0167	3.71265e-19	2.34082e-15
	ENSMUSG00000080859.1	Rpl10-ps1	108.193	0	0	0	0.064009	0	0	0	0	12.0286	27.0482	0.0128018	-4.79149	86.85	1.17072e-20	1.47628e-16
