# Supplementary material for: Cabergoline as a Novel Strategy for Post-Pregnancy Breast Cancer Prevention in Mice and Human
Source: Research Square preprint supplement (doi:10.21203/rs.3.rs-3854490/v1), 2024-02-05
Supplement: Supplementary file 12 [file bb03b67868118ebec31f8222.xlsx]

## Sheet: Supplementary Table S6
	Row.names	Symbol	A1_Nullip	A2_Nullip	A3_Nullip	A4_Nullip	A5_Nullip	D1_Mult_lact	D3_Mult_lact	D4_Mult_lact	D5_Mult_lact	Exp_Mean	Mean_Nullip	Mean_Mult_lact	log2FC	Stat	P value	P Adj
	ENSMUSG00000114956.1	Gm47893	0	0	0	0	0	17.5055	93.4529	0	0	12.3287	0	27.7396	4.84497	43.4859	4.27018e-11	1.30139e-08
	ENSMUSG00000031710.4	Ucp1	0.445885	0.19278	3.59205	0	0	0	117.111	0	0.064597	13.4896	0.846143	29.2939	4.03644	57.1384	4.06189e-14	4.33268e-11
	ENSMUSG00000082127.2	Gm13577	0	0	0	0	0	26.6619	2.91725	12.1716	0	4.63897	0	10.4377	3.51572	15.8799	6.74904e-05	0.00270384
	ENSMUSG00000114941.1	Gm47779	0	0	0	0	0	0	0	40.991	0	4.55456	0	10.2477	3.49156	11.6616	0.000638031	0.0176009
	ENSMUSG00000021622.3	Ckmt2	17.0655	6.70029	46.5986	7.96783	4.05824	2.16486	151.974	616.497	5.06594	95.3436	16.4781	193.925	3.4793	31.8082	1.70174e-08	2.63219e-06
	ENSMUSG00000033196.17	Myh2	10.3693	9.15394	40.6922	4.68901	3.27934	1.29662	154.844	489.737	0.780585	79.4269	13.6368	161.665	3.47423	32.9063	9.67093e-09	1.59726e-06
	ENSMUSG00000035606.8	Ky	1.82775	1.82614	0.956162	1.62002	0.942963	0.520534	20.1269	79.566	2.33132	12.1909	1.43461	25.6362	3.45163	30.457	3.41358e-08	4.62216e-06
	ENSMUSG00000056328.14	Myh1	33.0108	25.0104	88.0169	18.0765	10.1023	2.77597	268.165	1150.91	4.17149	177.804	34.8434	356.506	3.31819	34.0632	5.33515e-09	9.35478e-07
	ENSMUSG00000061462.17	Obscn	7.47082	17.5184	76.516	11.2712	8.21954	5.17866	142.986	839.677	3.89129	123.637	24.1992	247.933	3.30431	29.3118	6.1618e-08	7.62039e-06
	ENSMUSG00000001027.7	Scn4a	5.29423	5.87047	20.8694	8.13738	2.95207	2.66782	61.8911	304.697	2.15899	46.0598	8.62471	92.8537	3.2856	25.8429	3.70365e-07	3.50944e-05
	ENSMUSG00000030592.18	Ryr1	12.3773	13.1894	53.1695	12.4706	6.7901	3.58528	128.781	662.144	3.27402	99.5312	19.5994	199.446	3.28254	30.8134	2.84063e-08	3.99561e-06
	ENSMUSG00000091561.2	Gm6665	0	0	0	0	0	19.3519	7.46113	0	7.72628	3.8377	0	8.63483	3.26826	20.2799	6.68992e-06	0.000383784
	ENSMUSG00000030399.2	Ckm	294.759	165.8	820.588	191.054	95.5278	62.085	2235.35	9516.75	41.5932	1491.5	313.546	2963.94	3.23666	26.4366	2.72334e-07	2.72334e-05
	ENSMUSG00000016349.10	Eef1a2	14.6594	7.67561	36.4381	12.6705	5.12045	4.0558	123.086	443.872	3.66811	72.3607	15.3128	143.67	3.14869	27.1507	1.88197e-07	2.00743e-05
	ENSMUSG00000027887.11	Sypl2	2.67399	2.22673	6.62206	1.41459	1.30963	0.567334	25.6808	104.41	0.843431	16.1943	2.8494	32.8754	3.13753	19.339	1.09448e-05	0.000589867
	ENSMUSG00000071540.4	3425401B19Rik	2.44697	0.711823	4.60179	0.899212	0.863492	0.078439	20.6424	76.271	0.257481	11.8636	1.90466	24.3123	3.1234	23.2721	1.40627e-06	0.000107786
	ENSMUSG00000005716.16	Pvalb	141.293	75.5187	261.046	96.3134	38.5606	20.7462	875.411	3305.04	16.686	536.735	122.546	1054.47	3.09476	25.2135	5.13229e-07	4.6591e-05
	ENSMUSG00000021579.4	Lrrc14b	0	0	0	0	0	0	7.31132	22.2755	0	3.28742	0	7.3967	3.06982	103.687	2.36979e-24	3.03333e-20
	ENSMUSG00000057003.12	Myh4	37.9429	32.2	196.086	14.026	5.25045	1.68773	295.601	1637.73	2.79546	247.036	57.1011	484.454	3.0627	25.837	3.71507e-07	3.50944e-05
	ENSMUSG00000051747.14	Ttn	42.7963	73.2007	346.554	25.3513	22.0511	13.9042	611.88	2759.15	15.1394	434.447	101.991	850.018	3.04668	30.3541	3.59948e-08	4.82443e-06
	ENSMUSG00000061723.18	Tnnt3	76.8885	66.2084	173.72	30.4573	12.0235	15.426	543.782	1814.87	24.9479	306.48	71.8595	599.756	3.04359	23.223	1.44261e-06	0.000110242
	ENSMUSG00000059741.13	Myl3	3.46074	5.48547	14.296	3.51255	7.93247	2.91535	53.7784	197.034	2.08136	32.2774	6.93745	63.9523	3.03263	29.361	6.00735e-08	7.53713e-06
	ENSMUSG00000030996.8	Art1	6.14148	2.72808	9.72617	2.94877	0.724648	0.210019	36.1065	137.143	0.913132	21.8491	4.45383	43.5932	3.03148	27.4443	1.61687e-07	1.76135e-05
	ENSMUSG00000030730.12	Atp2a1	212.721	122.93	581.689	163.266	66.0514	32.2523	1351.84	6103.33	27.7267	962.423	229.331	1878.79	3.02879	24.5591	7.20659e-07	6.02904e-05
	ENSMUSG00000026950.17	Neb	36.8628	19.5052	104.813	11.5556	18.7288	13.5274	269.936	982.28	10.9593	163.13	38.2931	319.176	3.02652	25.7831	3.82022e-07	3.58233e-05
	ENSMUSG00000007122.11	Casq1	16.6189	7.70893	19.787	8.801	5.5138	1.65576	77.2474	328.792	1.60355	51.9698	11.6859	102.325	3.02588	26.5256	2.6007e-07	2.63153e-05
	ENSMUSG00000104692.1	Gm42773	0	0	0	0	0	27.3645	0	0	0	3.0405	0	6.84112	2.97106	10.1001	0.00148261	0.0344418
	ENSMUSG00000025141.2	Myadml2	4.10829	4.4884	9.79389	4.76721	1.51975	1.34698	34.0067	145.123	1.16707	22.9246	4.93551	45.4109	2.96702	25.1908	5.19288e-07	4.6809e-05
	ENSMUSG00000019787.9	Trdn	6.46541	4.53967	16.4364	1.21589	2.07268	0.925437	50.1012	167.186	0.809039	27.7502	6.14601	54.7554	2.9639	19.412	1.05344e-05	0.00057015
	ENSMUSG00000053093.16	Myh7	3.32409	27.5062	86.2957	36.0282	29.9519	2.35469	145.643	1014.75	4.39542	150.028	36.6212	291.786	2.96023	26.1448	3.16743e-07	3.04836e-05
	ENSMUSG00000032523.11	Hhatl	0.735124	1.57978	6.02486	2.31449	0.951363	1.44953	14.6401	82.8183	0.442616	12.3285	2.32112	24.8376	2.95973	32.5926	1.13646e-08	1.82977e-06
	ENSMUSG00000006457.3	Actn3	41.7307	20.4146	74.0361	18.8166	7.2054	4.74205	220.293	782.049	3.04065	130.259	32.4407	252.531	2.92249	22.3276	2.29879e-06	0.000163017
	ENSMUSG00000070424.12	Art5	0.656926	2.49319	2.75408	0	0.074651	0.081187	17.7165	43.5583	0.306109	7.51566	1.19577	15.4155	2.90226	24.1941	8.70979e-07	7.02098e-05
	ENSMUSG00000020061.17	Mybpc1	50.3842	16.9352	66.2305	28.5296	9.98002	2.82866	234.326	790.485	4.35344	133.784	34.4119	257.998	2.87064	22.0256	2.69032e-06	0.000184644
	ENSMUSG00000032648.14	Pygm	72.5484	36.5613	111.339	34.6059	17.1413	11.4451	291.02	1297.76	14.3737	209.644	54.4392	403.65	2.8677	24.5859	7.10701e-07	5.96523e-05
	ENSMUSG00000031972.5	Acta1	678.243	290.902	1168.68	465.974	198.972	62.9636	3891.31	12153.5	88.5287	2111.01	560.554	4049.08	2.85045	21.6998	3.18822e-06	0.000208662
	ENSMUSG00000024526.8	Cidea	0.150631	0	3.13307	1.20261	1.54937	0	58.9993	0.334604	0	7.26329	1.20714	14.8335	2.84273	34.2088	4.95035e-09	8.80063e-07
	ENSMUSG00000097221.1	1810049J17Rik	0	0	1.87688	0	0	21.6678	0	13.5927	0	4.12638	0.375376	8.81513	2.83518	31.8196	1.69179e-08	2.63219e-06
	ENSMUSG00000026407.17	Cacna1s	10.0154	6.78818	23.9617	13.7043	4.99127	6.55352	75.1309	274.575	5.54652	46.8074	11.8922	90.4515	2.82651	22.3329	2.29242e-06	0.000163016
	ENSMUSG00000031461.4	Myom2	11.0812	16.0528	40.5078	14.5608	4.07501	1.40683	79.6937	419.936	8.62888	66.2159	17.2555	127.416	2.81442	18.5614	1.64522e-05	0.000827317
	ENSMUSG00000094661.1	Ccl19	0	0	0	0	0	0	0	23.8771	2.9e-05	2.65301	0	5.96928	2.80101	26.1941	3.08772e-07	3.00553e-05
	ENSMUSG00000038670.11	Mybpc2	32.0456	14.746	49.8795	14.8605	6.1093	5.91382	149.464	514.252	4.68251	87.9948	23.5282	168.578	2.78944	21.2297	4.07395e-06	0.000253754
	ENSMUSG00000078141.3	Gm2399	2.09895	0	0	0	0	2.93356	21.8504	5.04153	5.27235	4.13298	0.41979	8.77446	2.78334	11.8988	0.000561699	0.0160665
	ENSMUSG00000060600.15	Eno3	55.313	105.748	189.183	65.8975	39.5129	88.1116	505.88	1818.89	84.2693	328.089	91.1309	624.288	2.76276	23.0714	1.56098e-06	0.000117463
	ENSMUSG00000022215.6	Fitm1	4.30417	1.48018	6.47079	5.64134	4.44002	0.849176	30.3457	111.797	1.233	18.5068	4.4673	36.0562	2.76082	23.7359	1.10501e-06	8.67741e-05
	ENSMUSG00000068697.7	Myoz1	33.9691	20.1425	53.2579	23.9172	8.551	2.27311	194.679	575.698	5.43323	101.991	27.9675	194.521	2.75481	19.103	1.23851e-05	0.00065373
	ENSMUSG00000033044.12	Dhrs7c	3.13053	2.34769	8.67264	2.01142	0.109965	1.31262	21.3763	86.2745	0.415469	13.9612	3.25445	27.3447	2.73604	24.0332	9.46907e-07	7.5049e-05
	ENSMUSG00000020216.13	Jsrp1	1.28432	2.83356	14.2092	8.87656	2.77897	0.5787	32.0833	147.491	1.50202	23.5153	5.99652	45.4138	2.72984	22.711	1.88287e-06	0.000137718
	ENSMUSG00000025488.9	Cox8b	13.8209	15.551	40.1218	2.56358	10.2512	7.42181	179.834	265.612	5.88873	60.1183	16.4617	114.689	2.72799	21.9326	2.82396e-06	0.000189472
	ENSMUSG00000038201.10	Kcna7	1.70366	1.15295	3.72283	0.654795	2.84838	1.60484	9.18543	62.4881	1.39322	9.41713	2.01652	18.6679	2.70488	26.9762	2.0598e-07	2.1611e-05
	ENSMUSG00000046818.7	Ddit4l	8.86626	7.78393	11.8633	12.5842	21.9351	2.46764	106.501	236.601	4.3793	45.8869	12.6066	87.4872	2.70117	15.5638	7.97692e-05	0.00312724
	ENSMUSG00000002500.15	Rpl3l	6.24918	7.06765	15.6426	6.60341	3.1975	5.60311	56.6933	158.823	2.13683	29.113	7.75207	55.8141	2.69855	22.6978	1.89582e-06	0.000137878
	ENSMUSG00000007877.2	Tcap	7.60987	24.5883	62.1782	27.8878	18.4728	4.67506	157.877	579.151	8.40188	98.9824	28.1474	187.526	2.69333	21.7345	3.13109e-06	0.000206057
	ENSMUSG00000112521.1	Gm29884	0	0	0	0	0	0	5.24303	16.5785	0	2.42461	0	5.45538	2.6905	40.035	2.49458e-10	5.91307e-08
	ENSMUSG00000027470.9	Mylk2	6.13114	4.68769	14.836	6.00378	3.26798	0.728419	43.2826	156.325	0.9381	26.2445	6.98532	50.3185	2.68406	22.0801	2.61513e-06	0.000180939
	ENSMUSG00000013936.12	Myl2	15.6934	11.2594	16.8375	14.2904	13.3956	7.94925	90.9383	276.809	4.9989	50.2413	14.2953	95.1739	2.65256	11.165	0.00083353	0.0217517
	ENSMUSG00000049134.15	Nrap	9.41481	4.76902	22.0172	4.00623	2.02796	1.33883	52.3278	177.473	1.18614	30.5068	8.44704	58.0814	2.64477	21.0516	4.47078e-06	0.000273809
	ENSMUSG00000025129.2	Ppp1r27	3.18772	1.70496	6.91387	7.30837	3.77722	0.388701	37.2407	95.0512	1.86632	17.4932	4.57843	33.6367	2.63437	22.16	2.5085e-06	0.000175007
	ENSMUSG00000049233.7	Apoo-ps	0	0	0	0.488133	0.000103	7.85052	0	9.31949	5.62326	2.58683	0.0976472	5.69832	2.60938	38.4265	5.68558e-10	1.23348e-07
	ENSMUSG00000038403.10	Hfe2	4.05077	2.90627	8.41114	4.80006	2.02703	0.871352	28.3516	99.14	0.252197	16.7567	4.43905	32.1538	2.60775	21.9303	2.82728e-06	0.000189472
	ENSMUSG00000031791.8	Tmem38a	17.3029	8.2381	32.1061	17.6913	10.9619	2.41547	83.6435	342.418	5.01623	57.7548	17.2601	108.373	2.5825	19.7592	8.78382e-06	0.000487778
	ENSMUSG00000044086.8	Lmod3	1.04685	0.680166	1.41542	0.845075	0.096578	0.052603	8.54247	29.6454	0.228325	4.7281	0.816818	9.6172	2.54692	29.9994	4.32177e-08	5.7325e-06
	ENSMUSG00000028584.3	Lrrc38	0.33055	0.171854	0.555031	0	0	0	4.4798	19.7449	0.086554	2.81874	0.211487	6.07781	2.54652	46.5422	8.96643e-12	3.76296e-09
	ENSMUSG00000115938.1	AC134548.1	0	0	0	0	0	9.46137	0	7.62227	2.15334	2.13744	0	4.80924	2.53835	12.3775	0.000434529	0.0128749
	ENSMUSG00000042828.12	Trim72	0.684119	2.89285	12.2843	3.14704	1.40995	1.30198	23.5978	88.0407	1.07145	14.9367	4.08365	28.503	2.53692	23.0815	1.5528e-06	0.000117262
	ENSMUSG00000005373.13	Mlxipl	4.10735	4.53727	14.8532	6.20599	7.69956	0.90023	109.326	78.4021	3.85101	25.5425	7.48067	48.1198	2.53405	15.1282	0.000100451	0.00377058
	ENSMUSG00000047419.5	Cmya5	14.0521	7.39548	23.8767	4.71431	3.17729	4.1513	55.2253	201.225	3.84611	35.296	10.6432	66.1119	2.52708	18.724	1.51073e-05	0.000767998
	ENSMUSG00000074218.3	Cox7a1	15.4486	13.6516	25.0051	9.20564	22.4872	6.24859	168.653	226.918	11.5085	55.4585	17.1596	103.332	2.52238	17.2112	3.34455e-05	0.00148905
	ENSMUSG00000033065.14	Pfkm	35.4219	30.9388	91.5019	44.0792	34.3049	24.1786	199.462	862.366	13.1472	148.378	47.2493	274.788	2.51498	18.3393	1.84857e-05	0.000910064
	ENSMUSG00000030785.8	Cox6a2	10.9718	3.92134	19.1141	3.59605	2.60561	4.4476	41.3363	153.368	2.45621	26.8686	8.04178	50.402	2.50715	18.7289	1.50683e-05	0.000767998
	ENSMUSG00000058927.5	Gm10053	0	4.49841	5.75703	0	0	0.436271	28.1845	31.4215	5.21928	8.39078	2.05109	16.3154	2.50466	24.9563	5.86457e-07	5.17773e-05
	ENSMUSG00000018893.15	Mb	102.835	21.5776	89.0708	76.9932	28.8603	3.11683	436.192	1016.6	10.9385	198.465	63.8674	366.712	2.50301	20.9357	4.74972e-06	0.000288819
	ENSMUSG00000070385.12	Ampd1	9.67032	16.2644	19.5146	1.36127	4.51632	24.1208	43.9651	169.193	13.3161	33.5469	10.2654	62.6487	2.49824	20.5059	5.9447e-06	0.000345873
	ENSMUSG00000031097.15	Tnni2	39.3156	22.9664	105.908	17.0564	17.484	20.7573	205.318	688.019	11.9904	125.424	40.5461	231.521	2.48458	18.3423	1.84568e-05	0.000910064
	ENSMUSG00000098668.1	Gm27210	0	0.575911	5.3898	0	0.590167	0	8.14748	38.2244	1.10489	6.00363	1.31118	11.8692	2.47722	21.944	2.8073e-06	0.000189472
	ENSMUSG00000038239.11	Hrc	3.23127	2.24322	9.58092	4.11488	1.97075	0.354209	21.0863	89.2702	1.50297	14.8172	4.22821	28.0534	2.47432	20.2767	6.70123e-06	0.000383784
	ENSMUSG00000040694.3	Apobec2	22.4629	10.2986	18.4491	15.5033	12.7831	4.66275	80.813	277.817	5.80805	49.8442	15.8994	92.2752	2.46452	17.3248	3.15052e-05	0.00141497
	ENSMUSG00000044938.8	Klhl31	15.3268	4.0326	10.1544	3.13592	2.18051	1.74882	36.4941	129.773	1.65464	22.7223	6.96605	42.4176	2.44635	17.0066	3.72508e-05	0.00162734
	ENSMUSG00000026418.16	Tnni1	5.48964	8.36617	25.613	15.1524	12.4751	3.32097	49.1282	248.844	5.13143	41.5023	13.4193	76.6061	2.42817	16.2493	5.55291e-05	0.00228533
	ENSMUSG00000029862.15	Clcn1	2.1489	5.65396	5.2765	3.01865	2.51599	0.286733	19.386	75.9006	1.28196	12.8299	3.7228	24.2138	2.4165	29.8421	4.68702e-08	6.12182e-06
	ENSMUSG00000044951.15	Mylk4	9.28134	9.09994	13.7914	4.93896	3.22677	2.53032	34.1179	150.923	1.49581	25.4895	8.06768	47.2668	2.41222	12.3537	0.000440117	0.0129804
	ENSMUSG00000020475.3	Pgam2	59.0274	25.4569	58.9129	40.1502	15.4373	15.6684	176.378	653.389	12.3149	117.415	39.7969	214.438	2.40074	15.9463	6.51637e-05	0.00262707
	ENSMUSG00000113296.1	Gm48032	0	0	0	0	0	7.91482	2.19102	1.81157	5.19342	1.9012	0	4.27771	2.39991	9.39637	0.00217416	0.0465372
	ENSMUSG00000051373.5	Plpp7	1.96512	0.997446	2.70061	2.56031	4.12494	0.182517	14.0899	53.7982	0.914201	9.03703	2.46969	17.2462	2.39472	22.2589	2.38255e-06	0.000167564
	ENSMUSG00000072720.9	Myo18b	2.65574	3.39384	17.4759	3.19323	3.08629	2.77743	25.986	112.2	1.01155	19.0867	5.961	35.4937	2.39028	19.8645	8.31319e-06	0.000464667
	ENSMUSG00000011148.14	Adssl1	15.5981	10.2566	34.6311	20.153	16.5737	13.1844	88.4163	317.424	4.5159	57.8615	19.4425	105.885	2.38642	17.7024	2.583e-05	0.00120009
	ENSMUSG00000055027.17	Smyd1	11.1249	3.09706	8.71057	1.78333	1.84158	0.102207	35.4789	90.6895	1.7204	17.172	5.31149	31.9978	2.38632	21.3728	3.78098e-06	0.000237821
	ENSMUSG00000010064.15	Slc38a3	2.58824	1.23237	6.20438	6.52598	8.7185	0	19.9063	102.385	0.186294	16.4163	5.05389	30.6194	2.38487	19.4619	1.02625e-05	0.000556612
	ENSMUSG00000038663.7	Fsd2	3.84902	1.71844	4.65681	1.91105	1.22199	0.472131	15.7133	55.7981	0.529879	9.54119	2.67146	18.1284	2.38129	19.9715	7.86046e-06	0.000442259
	ENSMUSG00000018566.14	Slc2a4	8.87318	8.41251	27.3973	17.6338	14.1698	1.62014	115.404	214.476	2.83779	45.6472	15.2973	83.5845	2.37576	17.0863	3.57187e-05	0.00157927
	ENSMUSG00000081194.1	Gm8424	2.89619	1.08464	1.80668	0.636178	0.7657	0	12.2757	33.7711	0.241002	5.94191	1.43788	11.572	2.36651	21.4498	3.63211e-06	0.000230725
	ENSMUSG00000024617.16	Camk2a	4.75112	4.51778	9.59319	3.29011	5.16939	5.30437	20.7839	98.1266	3.55	17.2318	5.46432	31.9412	2.34932	11.7233	0.000617237	0.017138
	ENSMUSG00000036854.14	Hspb6	29.3118	51.1272	123.15	51.5679	25.2077	16.1392	283.333	838.063	13.6483	159.061	56.0729	287.796	2.33917	11.845	0.00057815	0.0163905
	ENSMUSG00000027077.7	Smtnl1	2.95269	2.18119	5.32509	1.98494	0.815291	0.136512	16.3552	52.6216	0.533615	9.21179	2.65184	17.4117	2.33393	19.7112	9.00707e-06	0.000496942
	ENSMUSG00000038763.12	Alpk3	3.35751	4.62233	15.4704	7.60104	1.48738	2.77739	29.3903	113.166	1.30011	19.9081	6.50773	36.6585	2.32652	22.432	2.17721e-06	0.000155689
	ENSMUSG00000078815.8	Cacng6	0.913615	0.464276	1.79134	0.274489	0.274551	0.298956	5.42685	24.8549	0.311519	3.84561	0.743654	7.72306	2.32272	28.0168	1.20267e-07	1.36232e-05
	ENSMUSG00000049641.14	Vgll2	2.50129	1.59046	4.93663	0.450725	0.608907	0.883338	11.4987	43.3818	0.127913	7.33108	2.0176	13.9729	2.31088	20.5	5.96309e-06	0.000346157
	ENSMUSG00000056836.8	Gm6851	0	0	0	0	0	12.3902	3.40308	0	0	1.75481	0	3.94832	2.30694	26.727	2.34322e-07	2.40909e-05
	ENSMUSG00000038170.15	Pde4dip	40.3199	48.7079	96.9779	48.8869	40.0635	48.1827	231.42	783.068	37.6395	152.807	54.9912	275.078	2.3018	11.6003	0.000659411	0.0180545
	ENSMUSG00000061816.15	Myl1	405.723	50.2414	241.312	106.482	46.1608	10.2703	917.338	2414.47	20.7196	468.08	169.984	840.699	2.29945	13.5424	0.000233237	0.00763539
	ENSMUSG00000108099.1	Gm43988	0	0	0	0	0	0	3.33854	4.11021	8.21687	1.74062	0	3.91641	2.2976	9.58805	0.00195848	0.0429623
	ENSMUSG00000025754.11	Agbl1	2.05284	2.99904	6.31782	1.28264	1.65308	1.30338	12.4639	56.836	1.11545	9.55824	2.86108	17.9297	2.29357	19.3282	1.10068e-05	0.000591964
	ENSMUSG00000021768.15	Dusp13	3.28417	5.65362	20.7951	5.18075	4.04916	1.02623	33.832	130.694	2.82137	23.0374	7.79256	42.0934	2.29311	23.2035	1.45731e-06	0.000111033
	ENSMUSG00000079278.1	Tmem233	2.1544	0.360131	1.33568	0.639601	0.511559	0.27873	10.9353	23.72	0.201589	4.45967	1.00027	8.7839	2.29021	23.4114	1.30804e-06	0.000101473
	ENSMUSG00000024471.12	Myot	20.4412	3.49204	19.2895	2.89855	1.4252	0.056239	59.76	140.874	0.883638	27.68	9.5093	50.3935	2.28992	14.8788	0.000114642	0.00422886
	ENSMUSG00000042874.1	D930007J09Rik	0	0	0	0	0	8.86535	0	6.55085	0	1.71291	0	3.85405	2.27919	26.2713	2.96662e-07	2.89868e-05
	ENSMUSG00000026208.9	Des	46.892	49.2796	86.472	63.0302	32.3417	43.4673	290.004	727.53	31.8448	152.318	55.6031	273.212	2.27634	16.6691	4.44994e-05	0.00189233
	ENSMUSG00000020067.8	Mypn	2.46225	1.22719	4.68662	2.09486	0.685573	0.124699	13.8672	44.3632	0.198209	7.74553	2.2313	14.6383	2.2749	22.0134	2.70756e-06	0.000185137
	ENSMUSG00000079055.10	Slc8a3	0.806549	0.839127	2.81209	1.94301	0.66206	0.544349	8.01067	33.6957	0.223904	5.50416	1.41257	10.6187	2.2678	16.6944	4.39114e-05	0.00187668
	ENSMUSG00000023019.12	Gpd1	7.89799	4.28751	23.1102	18.891	25.3581	1.73607	247.629	69.6191	1.20443	44.4148	15.909	80.0472	2.26097	19.0411	1.2793e-05	0.000672489
	ENSMUSG00000022519.14	Srl	22.9657	8.35273	27.9705	9.4828	12.6409	7.80752	64.0643	250.156	3.08035	45.169	16.2825	81.277	2.25118	17.5918	2.73767e-05	0.00126051
	ENSMUSG00000046480.6	Scn4b	6.27628	10.6827	15.6439	8.03363	5.7699	16.4324	33.7333	133.106	8.40775	26.454	9.28128	47.9199	2.2504	16.2591	5.52441e-05	0.00227737
	ENSMUSG00000031543.18	Ank1	7.85477	9.16734	19.0204	4.78325	4.91417	9.20768	43.4015	132.03	3.78828	26.0186	9.14799	47.1069	2.24505	13.3503	0.000258388	0.00834141
	ENSMUSG00000026817.14	Ak1	29.0661	15.5515	46.0204	42.2399	57.8833	21.7954	163.202	542.885	9.40541	103.117	38.1522	184.322	2.24287	14.6612	0.000128664	0.00469204
	ENSMUSG00000021798.14	Ldb3	18.592	6.77903	29.0774	18.4546	9.69023	4.28475	89.1925	225.95	3.25244	45.0303	16.5187	80.6699	2.22091	10.6837	0.00108083	0.0270736
	ENSMUSG00000111027.1	Gm2981	0	0	1.55413	0	0	14.5315	0	2.80744	2.74043	2.40372	0.310826	5.01984	2.19925	28.4724	9.50454e-08	1.10098e-05
	ENSMUSG00000027022.13	Xirp2	26.8331	4.1969	18.8963	6.43129	2.65518	0.682804	68.2576	159.654	1.10657	32.0793	11.8026	57.4252	2.19016	13.2975	0.000265757	0.00852555
	ENSMUSG00000038676.6	Ucn	0	0	0	0	0	0	2.9741	10.7795	0.347161	1.56675	0	3.52519	2.17798	35.6846	2.31989e-09	4.2726e-07
	ENSMUSG00000031382.14	Asb11	4.86193	5.05159	8.43902	2.10115	0.977677	1.21033	17.836	70.0349	2.11898	12.5146	4.28627	22.8001	2.17064	15.3008	9.16799e-05	0.00349257
	ENSMUSG00000083287.4	Gm13502	0	0	1.61568	0	0	14.0511	3.98841	1e-06	1.69453	2.37219	0.323136	4.93351	2.16492	27.9284	1.2589e-07	1.41972e-05
	ENSMUSG00000035686.8	Thrsp	20.3311	11.0503	44.5578	27.682	35.6153	6.12661	438.351	63.194	5.71387	72.5136	27.8473	128.346	2.16473	15.2554	9.39058e-05	0.00356675
	ENSMUSG00000062077.14	Trim54	3.45393	1.35369	7.72242	2.10772	0	0	14.369	50.3021	0.906252	8.91279	2.92755	16.3943	2.14692	16.8054	4.14155e-05	0.00177892
	ENSMUSG00000083372.1	Gm11235	0	0	0	0	0	13.6768	0	0	0	1.51964	0	3.4192	2.14379	16.9481	3.8415e-05	0.00166965
	ENSMUSG00000055489.8	Ano5	1.24991	0.925748	2.05775	0.71657	0.581832	0.179318	7.04835	25.6309	0.307142	4.29972	1.10636	8.29143	2.14115	20.6531	5.50485e-06	0.000323963
	ENSMUSG00000075307.3	Klhl41	30.2971	10.8223	28.6263	15.3695	6.61389	2.73757	94.177	235.12	3.9778	47.5268	18.3458	84.0031	2.13549	13.097	0.000295775	0.00934796
	ENSMUSG00000029158.9	Yipf7	0.852133	0.275572	2.26682	0.405432	0	0	5.49589	21.0863	0.092097	3.38603	0.759991	6.66857	2.12339	21.6423	3.28519e-06	0.000212914
	ENSMUSG00000020722.5	Cacng1	2.20366	0.801939	2.58178	1.25889	0.567474	0.102731	8.7019	30.1085	0.268081	5.17722	1.48275	9.7953	2.12039	18.6925	1.53583e-05	0.000777021
	ENSMUSG00000030137.8	Tuba8	2.17984	1.10661	4.05012	5.18601	1.27284	0.410863	17.1878	42.7445	1.02538	8.35155	2.75908	15.3421	2.12014	17.0534	3.63424e-05	0.00159647
	ENSMUSG00000047591.5	Mafa	0.495518	0.895145	2.27538	1.33608	1.18291	0.166375	8.18966	26.2488	0.252643	4.56028	1.23701	8.71437	2.11855	22.095	2.59487e-06	0.000180023
	ENSMUSG00000006542.13	Prkag3	2.05997	2.4601	2.35009	1.29277	0.559396	1.80836	5.91852	35.0444	0.772101	5.8073	1.74447	10.8858	2.11465	18.5416	1.66238e-05	0.000832819
	ENSMUSG00000017300.9	Tnnc2	50.5369	21.2991	88.4504	31.31	9.96868	19.2661	179.034	499.439	9.98599	101.032	40.313	176.931	2.10665	13.0901	0.000296855	0.00935898
	ENSMUSG00000073375.2	Lrrc30	0.864244	0.295145	3.9356	0	0.502379	0.341728	5.60035	25.8109	0.237474	4.17642	1.11947	7.99761	2.08584	21.6369	3.29447e-06	0.000212976
	ENSMUSG00000056412.6	Gm12396	6.13538	0.000826	0	0	0	0	0	0	33.7263	4.42917	1.22724	8.43158	2.08224	9.60255	0.00194307	0.0426975
	ENSMUSG00000030695.16	Aldoa	343.402	317.978	673.883	491.311	530.651	300.406	2157.53	5254.66	278.556	1149.82	471.445	1997.79	2.08091	12.0136	0.000528124	0.015191
	ENSMUSG00000040287.9	Stac3	4.60101	6.03045	10.7161	7.67214	7.55549	7.23869	29.9761	94.5998	4.89755	19.2541	7.31504	34.178	2.08088	16.4017	5.12398e-05	0.00212945
	ENSMUSG00000026489.13	Coq8a	15.894	81.6691	183.825	52.4959	80.1121	54.5396	300.897	993.411	65.0399	203.098	82.7992	353.472	2.08066	18.7755	1.47042e-05	0.000755514
	ENSMUSG00000028976.10	Slc2a5	0.377901	0	0.273346	0	0.163383	0	14.115	1.24983	0.254291	1.82597	0.162926	3.90478	2.07643	47.0784	6.82021e-12	2.95928e-09
	ENSMUSG00000017817.11	Jph2	7.03342	6.25672	14.0083	20.2312	11.8604	4.5839	47.5764	157.62	1.43104	30.0668	11.878	52.8028	2.06277	13.9358	0.000189164	0.00646541
	ENSMUSG00000021200.14	Asb2	7.75407	14.7783	27.6135	16.3277	11.3908	17.6998	59.1646	181.736	14.0982	38.9514	15.5729	68.1746	2.06142	14.6428	0.000129932	0.00473153
	ENSMUSG00000079588.3	Tmem182	8.30808	1.22874	5.29371	1.83008	0.80877	0.587711	24.3558	45.2061	0.72854	9.81639	3.49388	17.7195	2.05851	13.8184	0.000201353	0.00682733
	ENSMUSG00000083365.1	Gm12895	16.1364	35438.1	10986.4	1369.23	5388.28	8478.65	25111.1	38310.8	104615	25523.7	10639.6	44128.9	2.05217	13.8512	0.000197865	0.00673585
	ENSMUSG00000047746.14	Fbxo40	5.56372	3.21259	7.06242	4.1764	1.59635	5.60854	17.1774	60.1497	1.18493	11.748	4.3223	21.0301	2.04936	15.3764	8.80808e-05	0.00337555
	ENSMUSG00000001508.15	Sgca	5.41306	2.21676	6.49283	5.76699	1.54999	0	13.2992	69.3316	0.790312	11.6512	4.28793	20.8553	2.04721	16.5848	4.65224e-05	0.00196025
	ENSMUSG00000038204.13	Asb10	0.858184	0.949718	2.92525	4.59711	1.41657	1.20095	8.69485	37.2032	0.907772	6.52818	2.14937	12.0017	2.04557	19.1309	1.22055e-05	0.00064558
	ENSMUSG00000091898.8	Tnnc1	8.20026	10.5351	20.2301	9.67949	14.9553	6.58448	41.6834	170.835	3.27732	31.7756	12.7201	55.5951	2.04439	14.3259	0.000153736	0.005421
	ENSMUSG00000031448.12	Adprhl1	2.2368	0.634827	2.72866	0.94614	0.590034	0.020858	8.11143	27.7756	0.079655	4.79156	1.42729	8.99689	2.04213	18.7393	1.4986e-05	0.000767285
	ENSMUSG00000074001.3	Klhl40	5.28816	2.31177	19.84	1.83033	2.87605	0.243918	30.7249	85.8448	0.719826	16.6311	6.42926	29.3834	2.03199	15.3054	9.1453e-05	0.00348912
	ENSMUSG00000084319.3	Tpt1-ps3	0	144.11	0	0	0	0	39.9639	0	440.799	69.4303	28.822	120.191	2.02283	13.4834	0.000240689	0.00783796
	ENSMUSG00000030672.12	Mylpf	186.467	228.513	142.412	67.0143	44.7137	156.107	612.011	1292.42	126.093	317.306	133.824	546.658	2.0222	15.1548	9.90482e-05	0.00373437
	ENSMUSG00000104648.1	Gm42570	0	0	0	0	0	0	0	11.9664	0	1.3296	0	2.9916	1.99697	12.6608	0.000373397	0.0114121
	ENSMUSG00000045104.8	Gm5514	0	0	4.38787	1.03607	0	2.64598	11.8168	14.7526	0	3.84881	1.08479	7.30384	1.99388	11.8236	0.000584846	0.0165072
	ENSMUSG00000032643.12	Fhl3	7.86215	8.83982	18.5478	9.62291	11.4701	10.2686	36.6304	133.827	9.88608	27.4394	11.2686	47.653	1.98756	11.9982	0.000532522	0.0153003
	ENSMUSG00000045667.14	Smtnl2	14.2703	4.08051	8.37903	10.7717	12.5804	2.61258	39.6145	124.848	1.93647	24.3437	10.0164	42.2529	1.97315	14.587	0.000133835	0.00484609
	ENSMUSG00000024049.14	Myom1	19.1768	8.70059	21.9994	23.3899	7.65799	5.46145	56.4794	199.96	2.61662	38.3825	16.1849	66.1294	1.9658	11.4048	0.000732561	0.0195944
	ENSMUSG00000027605.18	Acss2	24.0201	22.8827	29.5333	15.3691	16.177	23.846	222.019	79.3275	16.522	49.9663	21.5964	85.4286	1.93541	11.6535	0.000640833	0.0176401
	ENSMUSG00000049422.7	Chchd10	25.6223	21.4935	53.0061	14.6332	37.5404	31.3618	155.286	275.858	12.407	69.6898	30.4591	118.728	1.92821	14.6354	0.00013044	0.00474329
	ENSMUSG00000039891.6	Txlnb	4.65937	2.13673	5.18718	1.56722	2.10995	1.66647	18.0456	37.6925	1.38893	8.27266	3.13209	14.6984	1.92567	15.9513	6.49939e-05	0.00262436
	ENSMUSG00000008658.16	Rbfox1	5.59392	3.65621	6.32	3.90009	0.90216	0.036985	14.3715	57.0622	1.44051	10.3648	4.07448	18.2278	1.92186	12.1726	0.000484954	0.0141399
	ENSMUSG00000051367.8	Six1	4.2594	3.10766	10.6417	3.16592	9.11482	0.743676	32.2949	68.33	1.52824	14.7985	6.0579	25.7242	1.92084	15.0909	0.000102454	0.00382893
	ENSMUSG00000096825.2	Trav12-1	0	0.939949	0.915887	0	0	12.2451	0	0	4.49157	2.06583	0.371167	4.18417	1.91871	16.8112	4.12878e-05	0.00177642
	ENSMUSG00000048416.15	Mlf1	10.9809	3.40208	9.01125	4.54163	6.77289	2.01676	29.4263	82.9288	1.34199	16.7136	6.94175	28.9285	1.91399	11.7822	0.000597986	0.016804
	ENSMUSG00000083556.1	Gm9043	0	0	0	0	0	11.021	0	0	0	1.22456	0	2.75525	1.90891	12.4589	0.000415995	0.012441
	ENSMUSG00000060913.6	Trim55	1.74567	0.41803	1.59611	1.08015	0.971826	0	5.58394	22.7766	0.114895	3.80969	1.16236	7.11886	1.90867	18.9764	1.32348e-05	0.000691451
	ENSMUSG00000029685.15	Asb15	2.5077	1.01796	3.45116	0.860075	0.438544	0	5.87216	29.244	0.483685	4.87503	1.65509	8.89996	1.89866	12.0702	0.000512351	0.0148373
	ENSMUSG00000041653.5	Pnpla3	9.18747	20.7037	41.8569	0.961973	15.2876	5.55185	190.551	48.6407	26.2914	39.8925	17.5995	67.7587	1.88628	23.3674	1.33824e-06	0.00010288
	ENSMUSG00000027547.17	Sall4	0	0.039017	0.082567	0.034651	0	0.090902	3.53843	7.51031	0.039316	1.25947	0.031247	2.79474	1.87961	21.9836	2.74995e-06	0.000186734
	ENSMUSG00000028116.13	Myoz2	8.15054	3.76953	6.6608	3.66721	7.85559	1.91143	32.2748	62.076	2.902	14.3631	6.02073	24.7911	1.87718	10.0695	0.0015074	0.0349226
	ENSMUSG00000098369.6	Gm2274	3.11931	21.3388	0.00042	0	10.243	63.6179	35.8016	0	13.2212	16.3714	6.94031	28.1602	1.87673	12.4223	0.000424242	0.0125993
	ENSMUSG00000006435.15	Neurl1a	1.57743	1.87171	5.21148	3.72265	5.35079	1.02817	14.1211	46.775	0.86553	8.9471	3.54681	15.6974	1.8767	14.123	0.000171241	0.00595622
	ENSMUSG00000050860.6	Phospho1	16.4522	6.7793	9.81788	8.31817	6.9732	5.37883	76.2582	69.3102	1.63633	22.3249	9.66815	38.1459	1.87555	21.9464	2.80366e-06	0.000189472
	ENSMUSG00000022347.8	A1bg	0	0.113405	0.313297	0.100511	0.928522	0.19702	2.53643	11.2749	0.792292	1.80626	0.291147	3.70016	1.86406	26.6364	2.45569e-07	2.50461e-05
	ENSMUSG00000042717.5	Ppp1r3a	9.80972	1.58014	3.73864	1.33655	0.524473	0.061898	14.508	44.6536	0.442645	8.5173	3.3979	14.9165	1.85564	10.8931	0.000965237	0.0247596
	ENSMUSG00000093922.1	Rpl36-ps4	0	0	0.841979	0	0	5.1818	0	0	7.71527	1.52656	0.168396	3.22427	1.85417	13.4812	0.000240963	0.00783796
	ENSMUSG00000068699.12	Flnc	13.1908	7.40796	38.9135	23.7215	14.9445	6.18198	76.5429	207.696	2.63818	43.4708	19.6357	73.2648	1.84754	11.6583	0.000639175	0.0176134
	ENSMUSG00000026308.8	Klhl30	1.18222	0.690682	1.99567	1.53486	2.84481	1.02179	7.94954	24.6275	0.348246	4.68837	1.64965	8.48677	1.84012	16.3067	5.38728e-05	0.00222442
	ENSMUSG00000037139.15	Myom3	2.99128	1.65045	5.98114	1.28767	1.22692	0.224853	12.3972	33.6456	0.819564	6.69163	2.62749	11.7718	1.81592	20.8512	4.96392e-06	0.000297603
	ENSMUSG00000076594.2	Igkv6-13	0	0	1.62414	0	0	5.81656	1.10536	0	7.72079	1.80743	0.324828	3.66068	1.81473	11.7521	0.000607733	0.0169686
	ENSMUSG00000028396.5	2310002L09Rik	5.74995	0.265296	4.47816	0.220889	0.265914	0.144075	16.7417	23.7093	0.12553	5.74453	2.19604	10.1802	1.80658	10.4359	0.00123589	0.0301323
	ENSMUSG00000034768.4	Asb16	1.05687	1.92477	3.44322	1.40491	2.38114	0.559089	8.01012	28.945	1.00485	5.41444	2.04218	9.62976	1.80493	15.1102	0.000101414	0.00379561
	ENSMUSG00000021898.14	Asb14	4.33361	4.67212	6.96781	0.100766	2.05801	1.18511	10.2314	46.2813	2.81651	8.73852	3.62646	15.1286	1.80164	10.4851	0.00120344	0.0295097
	ENSMUSG00000051456.4	Hspb3	1.17261	0	0.357141	0	0	0	4.43344	9.70086	0	1.74045	0.30595	3.53357	1.79555	21.3186	3.88947e-06	0.000244045
	ENSMUSG00000058966.13	Fam57b	4.0278	1.36309	5.19356	3.63739	2.38941	0.398101	34.3394	20.0084	1.16733	8.05828	3.32225	13.9783	1.79302	10.6564	0.00109688	0.0273419
	ENSMUSG00000023153.9	Tmem52	2.99959	1.87591	3.19127	2.25492	1.32223	1.08346	11.0566	29.7483	0.235679	5.97422	2.32878	10.531	1.79245	12.3178	0.000448659	0.0131867
	ENSMUSG00000047485.6	Klhl34	1.30293	0.422965	3.07147	1.92209	0.337631	0.183806	7.75358	21.3076	0.106412	4.04539	1.41142	7.33785	1.78979	15.5549	8.01433e-05	0.00312754
	ENSMUSG00000067279.2	Ppp1r3c	27.7801	4.51195	15.2399	14.8474	9.03956	3.22851	71.1095	129.432	1.45532	30.7382	14.2838	51.3063	1.77498	9.23638	0.00237254	0.0492196
	ENSMUSG00000078162.6	Gm2574	0	0	0	0	0	3.13443	1.99391	3.77861	0.777701	1.07607	0	2.42116	1.77449	48.703	2.97817e-12	1.52482e-09
	ENSMUSG00000027895.9	Kcnc4	1.20227	0.18261	0.955975	0.55687	0.139107	0.697957	2.21475	14.7638	0.28952	2.33365	0.607366	4.49151	1.7725	19.9031	8.14688e-06	0.000456368
	ENSMUSG00000003476.16	Crhr2	2.38971	0.8461	1.99118	3.19568	1.62888	0.423378	7.49781	28.9265	0.274002	5.24147	2.01031	9.28042	1.77192	14.9263	0.000111791	0.00415364
	ENSMUSG00000068614.7	Actc1	2.8091	2.0387	1.25158	1.99682	2.39874	0	15.0924	22.6371	0.585067	5.42328	2.09899	9.57864	1.77129	12.561	0.000393889	0.011877
	ENSMUSG00000081604.5	Gm11518	15.1052	119.922	7.14297	0	0	68.741	48.4961	17.6926	260.044	59.6827	28.434	98.7434	1.76074	10.2918	0.00133624	0.0317915
	ENSMUSG00000031204.3	Asb12	1.97911	0.264931	0.852971	0	0.187483	0	5.07327	12.909	0.354283	2.40234	0.656899	4.58414	1.75285	17.1029	3.54078e-05	0.00156824
	ENSMUSG00000025216.9	Lbx1	0.582929	0.51856	0.859039	0.531339	0.594956	0.694656	3.95882	12.6158	0.442114	2.31091	0.617365	4.42785	1.74674	20.8805	4.88842e-06	0.000294456
	ENSMUSG00000106533.1	Trav3d-2	0	0.971546	0	0	0	10.1931	0	0	1.82629	1.44344	0.194309	3.00485	1.74557	10.4048	0.0012569	0.0305571
	ENSMUSG00000007097.14	Atp1a2	53.2091	30.9502	76.8811	67.654	34.3785	20.8332	212.359	465.825	13.2728	108.374	52.6146	178.072	1.73985	9.52623	0.00202556	0.0441534
	ENSMUSG00000090066.2	1110002E22Rik	2.47854	0.648291	10.8644	0.912641	0.662161	0.14242	12.7754	37.7642	0.218375	7.38516	3.11321	12.7251	1.73848	20.7994	5.0998e-06	0.000303616
	ENSMUSG00000052374.15	Actn2	45.9522	38.7835	70.0424	26.5463	27.4859	23.8859	125.876	378.045	37.8114	86.0476	41.7621	141.405	1.73559	13.0278	0.000306904	0.00961659
	ENSMUSG00000019194.15	Scn1b	17.6134	12.4453	28.3721	31.6193	26.054	15.1486	82.2453	211.736	9.41725	48.2946	23.2208	79.6368	1.73519	10.3816	0.00127281	0.0307105
	ENSMUSG00000031633.4	Slc25a4	25.565	77.6779	140.614	69.2673	163.189	72.0043	257.477	873.436	68.3237	194.173	95.2626	317.81	1.72765	10.0189	0.00154942	0.035447
	ENSMUSG00000068964.5	Gm6361	0	0	25.7389	0	0	27.0188	23.9384	15.8306	10.4807	11.4453	5.14778	19.3171	1.72456	11.3616	0.000749775	0.0199779
	ENSMUSG00000112182.1	Gm47845	0	0.753163	0	0	0	0	2.65602	8.54524	0	1.32827	0.150633	2.80031	1.72369	14.3769	0.000149627	0.00530534
	ENSMUSG00000049173.7	Myoz3	2.45061	1.14696	4.44512	2.51618	4.39518	0	10.9956	36.5224	0	6.94134	2.99081	11.8795	1.69032	11.7529	0.000607476	0.0169686
	ENSMUSG00000028464.16	Tpm2	142.523	62.9716	150.98	176.443	69.4671	42.8716	462.367	1026.17	25.2722	239.896	120.477	389.17	1.68342	10.8768	0.000973761	0.0249532
	ENSMUSG00000064179.13	Tnnt1	11.9784	16.9225	30.0798	20.2914	10.2078	15.8935	53.2959	153.772	15.3819	36.4248	17.896	59.5858	1.6809	15.0065	0.00010714	0.00398661
	ENSMUSG00000037904.14	Ankrd9	1.69196	5.53541	11.8972	7.10066	10.684	9.20169	14.8744	75.1638	4.11493	15.5849	7.38185	25.8387	1.67898	9.44793	0.00211388	0.0455133
	ENSMUSG00000005628.12	Tmod4	13.928	28.7934	47.083	20.209	17.8386	32.3993	73.7583	198.767	30.7885	51.5072	25.5704	83.9283	1.67643	10.9732	0.000924412	0.0238671
	ENSMUSG00000113437.1	Gm47412	0	0	0	0	0	0	2.95676	5.02637	0.762578	0.971745	0	2.18643	1.67194	11.633	0.00064792	0.0177969
	ENSMUSG00000116041.1	AL626769.2	0	0	0	0	0	0	5.35025	3.06223	0	0.93472	0	2.10312	1.63372	11.4272	0.00072377	0.0194219
	ENSMUSG00000054958.6	Nt5c1a	0	0.091763	0.590739	0.729034	0	0	4.15096	7.65102	0	1.46817	0.282307	2.9505	1.62329	24.8637	6.15297e-07	5.35769e-05
	ENSMUSG00000078937.8	Cpt1b	6.86187	18.1891	23.1888	3.74273	26.3908	5.85795	70.75	115.845	8.99345	31.0911	15.6747	50.3616	1.62303	24.2175	8.60457e-07	6.99292e-05
	ENSMUSG00000019848.14	Popdc3	1.36986	0	1.99434	1.02344	0	0	4.36833	14.6957	0	2.60574	0.877528	4.76601	1.61874	16.6057	4.60129e-05	0.00195021
	ENSMUSG00000111545.1	Gm18015	0	0	0	0	0	6.00796	0	0	2.1559	0.907096	0	2.04096	1.60453	10.0271	0.0015425	0.0354153
	ENSMUSG00000057897.14	Camk2b	3.45219	7.18729	7.14621	3.36097	3.47887	3.68191	18.71	40.2852	4.79129	10.2327	4.92511	16.8671	1.59239	14.1809	0.000166051	0.0058152
	ENSMUSG00000079015.2	Serpina1c	0.638552	0	3.41457	0.39249	0	15.836	0.751794	2.19648	7e-06	2.5811	0.889122	4.69607	1.59225	14.396	0.000148119	0.00527222
	ENSMUSG00000054978.3	Kbtbd13	0.40311	0.032779	0.247193	0.436989	0.174704	0.190471	2.14568	8.75895	0.033051	1.38033	0.258955	2.78204	1.58694	26.2977	2.92637e-07	2.87031e-05
	ENSMUSG00000079110.11	Capn3	3.55385	11.6519	7.91693	1.78468	5.59724	10.5578	12.9132	52.6644	5.18519	12.425	6.10092	20.3301	1.58682	14.4647	0.000142809	0.0050918
	ENSMUSG00000030433.15	Sbk2	7.6086	0.995978	8.17314	5.11761	3.28861	0.175509	11.455	55.7663	0.642025	10.3581	5.03679	17.0097	1.57692	15.7189	7.3486e-05	0.00291214
	ENSMUSG00000022441.17	Efcab6	0	0	0.362913	0	0.696112	0	0.715028	9.68328	0.039996	1.27748	0.211805	2.60958	1.57467	35.0271	3.25155e-09	5.82095e-07
	ENSMUSG00000067653.12	Ankrd23	36.6993	42.4387	49.8065	54.1425	37.8452	37.4596	125.109	333.682	37.9178	83.9001	44.1864	133.542	1.5741	13.4199	0.000248974	0.00806801
	ENSMUSG00000050211.14	Pla2g4e	1.48343	2.93171	2.48933	1.14674	1.30102	1.76946	6.49651	19.9699	1.90193	4.38778	1.87045	7.53445	1.57202	11.5559	0.000675344	0.0183728
	ENSMUSG00000090996.1	Gm20458	0.433186	1.77127	1.30406	0	0	9.92444	1.19942	4.4112	0.576035	2.17996	0.701703	4.02777	1.56294	15.7728	7.14232e-05	0.00284803
	ENSMUSG00000026564.9	Dusp27	0.436029	0.378533	0.867112	0.484116	0.151415	0	2.82578	10.198	0.191	1.72578	0.463441	3.30369	1.55621	20.8307	5.01726e-06	0.000299398
	ENSMUSG00000084340.1	Gm14766	0	0	0.760309	0	0.747608	0	0	4.77385	6.28355	1.39615	0.301583	2.76435	1.53213	10.6859	0.00107956	0.0270684
	ENSMUSG00000028348.7	Cavin4	3.64998	0.938349	3.40121	1.4895	2.68146	0.744376	8.91229	25.1974	0.696033	5.30118	2.4321	8.88752	1.52652	9.92329	0.001632	0.0370383
	ENSMUSG00000035923.4	Myf6	1.15441	0.527252	4.71552	1.08649	0.746264	0	6.49975	19.5713	0.264414	3.8406	1.64599	6.58387	1.51913	11.8375	0.000580506	0.0164391
	ENSMUSG00000001604.14	Tcea3	2.19922	1.92692	4.22123	6.75851	6.16239	1.4354	15.6923	37.4257	1.60531	8.603	4.25365	14.0397	1.51738	10.756	0.00103942	0.0263196
	ENSMUSG00000026062.12	Slc9a2	1.27541	0.276381	0.807801	0.705647	0.971289	0.021769	3.01354	13.3305	0.318276	2.30229	0.807306	4.17102	1.51661	15.5748	7.9304e-05	0.00312336
	ENSMUSG00000100743.1	Scgb1b25-ps	1.28483	0	0	0	0	5.77937	4.52084	0	0	1.28723	0.256966	2.57505	1.50802	11.1253	0.000851596	0.0222005
	ENSMUSG00000094220.5	Trav6-3	0	1.66024	1.74058	0	0	0	0	3.98453	10.6291	2.00161	0.680164	3.65341	1.46969	9.5159	0.002037	0.0443051
	ENSMUSG00000000628.10	Hk2	12.8507	11.409	17.4707	12.6744	22.5323	12.7993	66.3011	88.4065	7.20166	27.9606	15.3874	43.6771	1.44695	10.105	0.00147871	0.0344418
	ENSMUSG00000038754.4	Elovl3	0.165686	0	2.30735	0	0	0	12.2919	0	0	1.64055	0.494607	3.07298	1.44632	19.5923	9.58529e-06	0.000524413
	ENSMUSG00000004748.5	Mtfp1	1.65759	4.4051	2.14167	1.89888	7.50851	1.41721	13.7894	26.9555	2.91407	6.96533	3.52235	11.269	1.43988	11.5279	0.000685603	0.0186123
	ENSMUSG00000024210.2	Ip6k3	0.533265	1.94932	3.0778	0.346073	1.10732	4.5743	3.61339	10.8517	2.92341	3.21962	1.40276	5.4907	1.43368	11.9246	0.000553965	0.015863
	ENSMUSG00000060459.13	Kng2	0.258783	0.143628	0.694424	0	0.534277	0	10.1074	0.12371	0.067447	1.32552	0.326222	2.57464	1.43047	23.7733	1.08374e-06	8.53657e-05
	ENSMUSG00000033182.12	Kbtbd12	6.97979	2.35179	6.55751	3.41419	2.03123	0.514362	12.6708	37.3308	1.94691	8.19971	4.2669	13.1157	1.42228	16.7222	4.32726e-05	0.00185557
	ENSMUSG00000104972.1	Gm19931	0	0.730179	0	0	0	3.88671	1.03015	0.592312	2.77218	1.00128	0.146036	2.07034	1.42175	9.98945	0.0015744	0.0358901
	ENSMUSG00000025229.15	Pitx3	0.060833	0.522706	0	0	0	0.545845	1.18855	6.07009	0.158193	0.94958	0.116708	1.99067	1.42122	24.1952	8.70493e-07	7.02098e-05
	ENSMUSG00000078377.5	Gm4294	0	0	0	0	0	6.6688	0	0	0	0.740978	0	1.6672	1.41533	25.8546	3.68123e-07	3.50333e-05
	ENSMUSG00000106736.1	Gm42573	2.16568	0	0.408784	0.662262	0	0.428552	9.13958	3.22895	0.755279	1.86545	0.647345	3.38809	1.41345	9.82919	0.00171764	0.0386054
	ENSMUSG00000060726.10	Tmsb15a	0	0	0	0	0	2.69662	0	0	3.82062	0.724138	0	1.62931	1.39468	14.5116	0.000139298	0.00498048
	ENSMUSG00000116471.1	LT629149.9	0	0	0	0	3e-06	6.46238	0	0.007331	0	0.718857	6e-07	1.61743	1.38815	43.7156	3.79741e-11	1.2153e-08
	ENSMUSG00000116444.1	LT629152.10	0	0	0	0	3e-06	6.46231	0	0.007331	0	0.718849	6e-07	1.61741	1.38814	43.7154	3.79781e-11	1.2153e-08
	ENSMUSG00000096908.3	Trav7-3	0	0	0.71864	0	0	1.32269	0	4.29006	2.32027	0.961296	0.143728	1.98325	1.38314	11.756	0.000606485	0.0169686
	ENSMUSG00000054957.5	Gm9959	0	0	0	0	0	4.01941	0.88036	1.52597	0	0.713971	0	1.60644	1.38208	14.0818	0.000175034	0.00605522
	ENSMUSG00000113637.1	Gm7049	2.01891	0.838023	5.83685	2.25472	4.05676	0	27.1541	10.0817	0.151826	5.82143	3.00105	9.34691	1.37075	9.353	0.0022262	0.0470998
	ENSMUSG00000051596.13	Otop1	2.35033	0.485798	0.941012	0.915456	0.75337	1.12661	14.2606	1.73878	0.155441	2.52527	1.08919	4.32036	1.34858	10.3498	0.00129491	0.0311265
	ENSMUSG00000072968.4	Gm17728	0	0	0	0	0	4.01217	0	1.51055	0.624186	0.68299	0	1.53673	1.34297	13.8567	0.000197296	0.00672541
	ENSMUSG00000112022.1	Gm2436	0.171446	0.096353	0.065685	0	0.043962	0	0.053367	0.07639	6.78153	0.809859	0.0754892	1.72782	1.34276	22.4412	2.16676e-06	0.000155376
	ENSMUSG00000056900.13	Usp13	9.22195	2.65133	10.0116	3.93485	2.0377	0.79733	14.1051	47.2625	0.321227	10.0382	5.57149	15.6215	1.33876	13.3255	0.00026182	0.00843094
	ENSMUSG00000052135.8	Foxo6	0.724406	0.565224	0.568133	0.736355	0.441667	0.043761	3.08954	8.89138	0.189879	1.69448	0.607157	3.05364	1.33471	14.3337	0.000153099	0.00541344
	ENSMUSG00000041889.7	Shisa4	2.33754	5.20088	4.52284	9.77155	9.23218	3.3926	13.9627	48.5122	2.29893	11.0257	6.213	17.0416	1.32266	9.37519	0.00219941	0.0466487
	ENSMUSG00000052468.7	Pmp2	0	0.307563	0	0.475938	1.06197	0	3.88232	5.42783	0.386007	1.2824	0.369094	2.42404	1.32248	18.9533	1.3396e-05	0.000698447
	ENSMUSG00000084111.4	Gm15710	0	4.21171	1.02697	0	0	9.91089	1.86358	3.08546	1.15541	2.36156	1.04774	4.00383	1.289	9.31645	0.00227106	0.0478512
	ENSMUSG00000094446.1	Gm6344	0	0.74523	0	0	0	3.5038	1.34528	0	2.3158	0.878901	0.149046	1.79122	1.28046	12.7714	0.000351957	0.0108686
	ENSMUSG00000024747.3	Aldh1a7	1.39743	0.196864	0.211177	0.873992	1.4625	0	12.1789	1.48431	0	1.97835	0.828393	3.4158	1.2721	11.7973	0.000593157	0.016705
	ENSMUSG00000020333.17	Acsl6	0.764868	1.14294	0.643148	0.154557	0.847731	0.472651	2.54112	9.30638	0.131535	1.77833	0.710649	3.11292	1.26562	18.0327	2.17147e-05	0.00104886
	ENSMUSG00000066279.3	Chrna10	0.181717	0.118136	1.0461	2.26524	0	0	3.62302	8.88261	0.039679	1.79517	0.722239	3.13633	1.26407	20.831	5.01645e-06	0.000299398
	ENSMUSG00000094136.2	Gm5973	0	0	0.378509	0	0	0	3.32448	3.00374	0	0.745192	0.0757018	1.58205	1.26324	16.5834	4.65559e-05	0.00196025
	ENSMUSG00000048188.5	Gm8181	0	0	0	0	3.13829	7.62548	3.89657	0	0	1.62893	0.627658	2.88051	1.25345	11.6141	0.000654552	0.0179406
	ENSMUSG00000042045.6	Sln	0.386323	0.833582	0.715923	0.441933	1.06221	0.961838	3.29279	7.60163	0.083644	1.70887	0.687994	2.98498	1.23926	12.4409	0.000420041	0.01249
	ENSMUSG00000056978.8	Hamp2	0	1.01025	0	0	0	0	3.49255	0.425554	3.41214	0.926722	0.20205	1.83256	1.23661	10.6131	0.0011229	0.0277742
	ENSMUSG00000000253.13	Gmpr	6.63203	10.4886	22.3238	9.69944	12.8697	5.42407	28.4557	84.5947	3.65899	20.4608	12.4027	30.5334	1.23435	10.2499	0.00136695	0.0324018
	ENSMUSG00000028328.13	Tmod1	9.58294	4.32001	3.84548	6.53368	9.01513	2.66866	18.6848	45.4192	0.560043	11.1811	6.65945	16.8332	1.21925	11.0639	0.000880232	0.0228771
	ENSMUSG00000014609.16	Chrne	0	1.25107	0.348411	0.788647	0.353069	1.96393	3.6613	4.51059	0.262144	1.45991	0.548239	2.59949	1.21716	24.7321	6.58776e-07	5.64036e-05
	ENSMUSG00000063821.6	Dupd1	0	0	0.752259	0.768535	1.48801	0	2.01433	8.77913	0.100399	1.54474	0.601761	2.72346	1.21699	16.0273	6.24348e-05	0.00253301
	ENSMUSG00000105953.1	Trav15d-2-dv6d-2	0	0	0	0	0	0	2.08894	1.45072	1.69824	0.581989	0	1.30947	1.20756	13.5675	0.000230134	0.00761167
	ENSMUSG00000051980.13	Casr	0.084441	0.209187	0.197279	0.325601	0.055773	0.182501	1.6517	3.87434	1.11858	0.855489	0.174456	1.70678	1.20458	20.3604	6.41436e-06	0.000370672
	ENSMUSG00000026207.16	Speg	16.5276	38.2923	53.3948	32.7165	58.2305	22.7425	75.3002	264.883	9.43417	63.5024	39.8323	93.09	1.20433	12.3388	0.000443648	0.0130545
	ENSMUSG00000098387.2	Pet117	0	0	0	0	0	5.13954	0	0	0	0.57106	0	1.28489	1.19212	24.6779	6.77584e-07	5.74376e-05
	ENSMUSG00000045246.11	Kcng4	0.154024	0.657844	0.540407	0.24529	0.175016	0.063511	1.22162	6.48006	0.606736	1.12717	0.354516	2.09298	1.19122	17.5672	2.77336e-05	0.00127063
	ENSMUSG00000099009.1	Rdh16f1	0	0.935143	1.36474	0	0	3.4723	0	5.59006	0	1.26247	0.459977	2.26559	1.1614	14.9074	0.000112917	0.00418331
	ENSMUSG00000100679.1	Gm28778	0	0	0	0.006876	0	0	1.96786	2.92545	0	0.544465	0.0013752	1.22333	1.15074	29.5073	5.57051e-08	7.09478e-06
	ENSMUSG00000076855.5	Trav16	0	0	0	0	0	4.84945	0	0	0	0.538828	0	1.21236	1.14559	12.0284	0.000523947	0.0150878
	ENSMUSG00000113084.1	A030003K21Rik	0	0.23381	0	0	0.268623	3.67656	0.014677	0.019641	1.75871	0.663558	0.100487	1.3674	1.10516	17.886	2.34538e-05	0.00110983
	ENSMUSG00000021908.10	Gm6768	0	0	1.26857	0	0	6.78275	0	0	0	0.894591	0.253714	1.69569	1.10444	17.2577	3.26365e-05	0.00146065
	ENSMUSG00000099458.1	Gm19123	0	0.663669	0.23526	0.384797	0	3.75589	0.790822	2.25104	0	0.897942	0.256745	1.69944	1.10297	11.5631	0.00067273	0.0183212
	ENSMUSG00000031519.3	Asb5	4.30551	8.98886	15.6137	2.69848	14.9801	20.2646	14.8323	39.6605	9.04696	14.4879	9.31733	20.9511	1.08922	12.2821	0.000457325	0.0134107
	ENSMUSG00000051985.12	Igfn1	0.180658	0.306599	0.591491	0.054554	0.597011	0.121597	2.8015	4.26452	0.265871	1.02042	0.346063	1.86337	1.08897	18.7224	1.512e-05	0.000767998
	ENSMUSG00000110585.1	Gm45704	0	0	0	0	0	4.33152	0	0	0	0.48128	0	1.08288	1.05858	10.1001	0.00148261	0.0344418
	ENSMUSG00000044485.4	Klk1b11	0	0.290002	0.310013	0	0.459789	4.73459	0.103926	0.495729	0.737279	0.79237	0.211961	1.51788	1.05487	13.7332	0.000210692	0.00706909
	ENSMUSG00000038522.6	Mfsd4b1	0.084702	0.07344	0	0	0	0	0.792619	3.72037	0	0.519015	0.0316284	1.12825	1.04474	21.0987	4.3622e-06	0.000268443
	ENSMUSG00000095662.1	H2al1g	0	0	0	0	0	0	1.46756	2.41548	0.334317	0.468595	0	1.05434	1.03867	17.3076	3.17909e-05	0.0014253
	ENSMUSG00000079049.9	Serpinb1c	0	0.245949	0.796327	0.228108	0.273931	1.82994	2.51741	1.96741	0.374075	0.914794	0.308863	1.67221	1.02972	11.173	0.000829967	0.0216808
	ENSMUSG00000115074.1	AL732309.2	0	0	0	0	0	2.32169	1.09922	0.290357	0.418012	0.458809	0	1.03232	1.02313	59.5489	1.19294e-14	1.69663e-11
	ENSMUSG00000031394.11	Opn1mw	0	0	0.622271	0	0.989373	0	2.00048	4.74869	0	0.928979	0.322329	1.68729	1.02307	14.0743	0.000175731	0.00607115
	ENSMUSG00000030244.7	Gys2	0.825607	0	2.79127	0.131558	0.11836	0	9.32025	0.832091	0.111948	1.57012	0.773359	2.56607	1.00785	9.68789	0.00185487	0.041291
	ENSMUSG00000026241.5	Nppc	1.13121	0.112335	0.120359	0	0.476118	0	3.54679	3.08345	0.224818	0.96612	0.368004	1.71376	0.988223	10.0132	0.00155422	0.0354934
	ENSMUSG00000111958.1	Gm47844	0	0	0.085214	0	0	0	1.53899	2.39036	0.079655	0.454913	0.0170428	1.00225	0.977243	33.2782	7.98713e-09	1.36314e-06
	ENSMUSG00000075605.3	Slurp2	0	0	0	0	0	3.3599	0	0.504824	0	0.429414	0	0.966181	0.975396	15.4726	8.37098e-05	0.00322737
	ENSMUSG00000074243.4	Gm10651	0	0	0	0	0	3.81742	0	0	0	0.424158	0	0.954355	0.966693	17.3357	3.13248e-05	0.00140934
	ENSMUSG00000082146.1	Rpl23a-ps13	0	0	0	0	0	0	3.79615	0	0	0.421794	0	0.949037	0.962762	13.7118	0.000213112	0.00714092
	ENSMUSG00000016327.9	Atp1b4	0.78122	0.180505	0.633541	0.100681	0.120713	0.105349	1.25345	5.26669	0	0.938017	0.363332	1.65637	0.96232	11.7673	0.000602809	0.0169024
	ENSMUSG00000090319.1	Gm4462	0	0	0	0	0	2.67743	1.06746	0	0	0.416099	0	0.936222	0.953245	13.7778	0.000205754	0.00694895
	ENSMUSG00000031376.15	Atp2b3	0.09119	0.357168	0.580207	0.34335	0.301962	0.055421	1.05975	5.06337	0.151384	0.889311	0.334775	1.58248	0.952161	13.5574	0.000231379	0.00763539
	ENSMUSG00000082549.1	Gm14813	0	0	0	0	0	0	0.851844	0	2.8839	0.415083	0	0.933936	0.95154	9.67898	0.00186388	0.0414195
	ENSMUSG00000053821.3	Gm9922	0	0	0	0	0	0	3.71214	0	0	0.41246	0	0.928035	0.947131	13.179	0.000283098	0.00899171
	ENSMUSG00000008813.13	Tppp2	0	0	0.749719	0	0	0	0.775347	3.84267	0	0.596415	0.149944	1.1545	0.905793	15.1916	9.7136e-05	0.00367309
	ENSMUSG00000068392.3	Rnase13	0	0.153253	0.082301	0	0	0	0.550454	3.2324	0	0.44649	0.0471108	0.945713	0.893885	25.5876	4.22741e-07	3.90692e-05
	ENSMUSG00000074695.3	Il22	0	0	0	0	0	0	0	0	3.30777	0.36753	0	0.826943	0.869431	29.4711	5.67562e-08	7.19287e-06
	ENSMUSG00000116236.1	AC139209.4	0	0.129755	0.320531	0	0	0	0.694317	0.792453	2.43452	0.485731	0.0900572	0.980322	0.861332	23.0563	1.57328e-06	0.000117766
	ENSMUSG00000096582.1	Gm13289	0	0	0	0	0	3.21175	0	0	0	0.356861	0	0.802937	0.850349	13.2211	0.00027682	0.00882516
	ENSMUSG00000111277.2	Rab3a	0	0	0	0	0.001991	0	0.483634	0	2.65011	0.348415	0.0003982	0.783436	0.834085	17.8906	2.33968e-05	0.00110918
	ENSMUSG00000025075.14	Habp2	0.026711	0.034746	0.187531	0	0	0.24221	0.352579	2.84547	0	0.409916	0.0497976	0.860065	0.825242	24.9771	5.80142e-07	5.15682e-05
	ENSMUSG00000111526.1	Gm47433	0	0	0	0	0	0	0.294326	2.75528	0	0.338845	0	0.762401	0.817543	11.6222	0.000651688	0.0178813
	ENSMUSG00000075245.4	Gm6043	0	0	0	0	0	2.0292	0.260546	0	0.71435	0.333788	0	0.751024	0.808199	11.113	0.000857256	0.0223253
	ENSMUSG00000110131.1	Gm18066	0.270221	0.116897	0.125712	0.207173	0	0	1.21831	2.72223	0	0.517838	0.144001	0.985135	0.795149	14.9004	0.000113341	0.0041869
	ENSMUSG00000079428.8	Tceal7	0.478241	0.246697	0.528228	0	0	0	2.38873	2.21903	0	0.651214	0.250633	1.15194	0.782979	9.55475	0.00199433	0.0435621
	ENSMUSG00000087279.10	4930544D05Rik	0	0.162425	0.52028	0	0.495172	0	0.880571	2.97463	0.524783	0.61754	0.235575	1.095	0.761764	10.2175	0.00139115	0.0328328
	ENSMUSG00000042041.6	2010003K11Rik	0.451397	0	0.208645	0	0.206359	0	3.42159	0.501364	0	0.532151	0.17328	0.980738	0.755491	11.8676	0.000571205	0.0162476
	ENSMUSG00000101031.1	Ms4a12	0	0.163918	0.175002	0	0	2.05723	0	0	0.979323	0.375053	0.067784	0.759138	0.720249	11.432	0.000721906	0.0193972
	ENSMUSG00000049349.3	Gm5105	0.048523	0.062945	0	0	0	0	0.411042	2.27769	0	0.311133	0.0222936	0.672183	0.709923	25.825	3.73806e-07	3.51818e-05
	ENSMUSG00000019772.5	Vip	0	0.706262	0.50424	0.112671	0.047071	1.49757	0.511325	0.967581	1.28995	0.626297	0.274049	1.06661	0.697843	10.2654	0.00135545	0.0321888
	ENSMUSG00000083000.1	Gm15678	0	0	0.134078	0	0	0	0.808484	1.8237	0	0.307362	0.0268156	0.658046	0.691307	18.4758	1.72078e-05	0.000858712
	ENSMUSG00000035963.8	Odf3l2	0	0	0.382866	0	0	0	0.448339	2.45401	0	0.365024	0.0765732	0.725587	0.680641	16.3771	5.19089e-05	0.00215027
	ENSMUSG00000039546.9	Ajap1	0.024481	0.286689	0.205915	0.113255	0.441444	0.333219	1.44754	1.73558	0.224846	0.534774	0.214357	0.935296	0.672362	11.4174	0.000727581	0.0194833
	ENSMUSG00000051067.8	Lingo3	0.386521	0.027951	0.030122	0.422543	0.238441	0.032506	0.522833	3.14379	0.056391	0.540122	0.221116	0.93888	0.667024	10.2041	0.00140132	0.033033
	ENSMUSG00000025929.4	Il17a	0	0.289903	0	0	0.205028	0.111294	0	0.083023	2.61475	0.367111	0.0989862	0.702267	0.631284	12.0327	0.000522747	0.0150702
	ENSMUSG00000040752.16	Myh6	3.56991	0.47267	2.01971	6.70314	6.99093	1.6721	8.36487	15.3619	1.18956	5.14942	3.95127	6.64711	0.627115	14.0641	0.000176682	0.00609577
	ENSMUSG00000038216.7	Pnmt	0.380775	0.098448	4.92619	0.173677	0	0	1.3428	7.61085	0.098643	1.62571	1.11582	2.26307	0.625016	20.681	5.42516e-06	0.000320748
	ENSMUSG00000079379.2	Gm3242	0	0	0	0	0	0	0	2.12062	0	0.235624	0	0.530155	0.613678	9.25687	0.00234613	0.0489448
	ENSMUSG00000086524.3	Pabpc1l2a-ps	0	0	0	0	0	0	0	2.0696	0	0.229956	0	0.5174	0.601601	9.90882	0.00164488	0.0372741
	ENSMUSG00000060180.12	Myh13	0.166053	0.186433	0.241976	0.142616	0.033152	0.361861	1.0385	1.36408	0.11322	0.405321	0.154046	0.719415	0.575217	14.1163	0.000171848	0.0059692
	ENSMUSG00000108947.1	Olfr1422-ps1	0	0	0.192104	0	0	1.43545	0	0	0.716377	0.260437	0.0384208	0.537957	0.566624	9.3911	0.00218041	0.0465931
	ENSMUSG00000115022.1	Hacl1	0	0.189349	0.463308	0	0	2.51038	0	0	0.151785	0.368314	0.130531	0.665541	0.55899	10.315	0.00131954	0.0315114
	ENSMUSG00000090461.2	Iltifb	0	0	0	0	0	0	0	0	1.68299	0.186999	0	0.420747	0.50665	12.1922	0.000479896	0.0140244
	ENSMUSG00000116268.1	LT629154.11	0	0	0	0	0	1.6363	0	0	0	0.181811	0	0.409075	0.494748	16.8748	3.99276e-05	0.00173009
	ENSMUSG00000112279.1	Gm18774	0	0	0	0	0	0	0.180365	0.426888	0.997408	0.178296	0	0.401165	0.486627	9.67106	0.00187194	0.0415625
	ENSMUSG00000094918.3	Gm8765	0	0.053926	0.125195	0	0.033256	0	0.593033	1.21788	0	0.22481	0.0424754	0.452728	0.478752	21.6556	3.2626e-06	0.000211986
	ENSMUSG00000041798.15	Gck	0	0.287833	0.318115	0	0.044963	0	0.546388	1.31283	0.425224	0.32615	0.130182	0.57111	0.475229	10.2954	0.00133364	0.0317591
	ENSMUSG00000020591.11	Ntsr2	0	0	0.178455	0	0	0	0.9619	0.762865	0	0.211469	0.035691	0.431191	0.466623	17.9499	2.26798e-05	0.00108483
	ENSMUSG00000109926.1	Gm45808	0	0	0	0	0	0	0	1.51564	0	0.168404	0	0.37891	0.463528	13.4129	0.000249896	0.00808766
	ENSMUSG00000019932.8	Kera	0	0	0.047251	0	0.327245	0	0	1.85781	0	0.248034	0.0748992	0.464452	0.44616	14.0439	0.000178591	0.0061368
	ENSMUSG00000081767.1	Gm12067	0	0	0	0	0	1.14099	0.284574	0	0	0.158396	0	0.356391	0.439773	17.0556	3.63007e-05	0.00159647
	ENSMUSG00000080914.1	Gm7129	0	0.119087	0	0	0	0.820204	0.170828	0.306208	0.238176	0.183834	0.0238174	0.383854	0.434733	10.7783	0.00102697	0.0260302
	ENSMUSG00000052099.14	Prss51	0	0	0	0	0	0	0.161218	1.22216	0	0.153709	0	0.345844	0.428512	13.5388	0.00023368	0.00764012
	ENSMUSG00000111671.1	Gm6983	0	0	0	0	0	0	0.167704	1.19679	0	0.15161	0	0.341124	0.423442	9.51799	0.00203467	0.0442921
	ENSMUSG00000021439.8	Ctsq	0	0.243496	0	0	0	1.12277	0.251883	0.11063	0.115005	0.204865	0.0486992	0.400072	0.4169	9.25407	0.00234973	0.0489448
	ENSMUSG00000046215.3	Rprml	0	0	0	0	0	0	0.083982	1.20428	0	0.14314	0	0.322066	0.402794	15.389	8.74968e-05	0.0033582
	ENSMUSG00000073380.1	Arrdc5	0	0.110662	0.118581	0	0	0	0.079413	1.42409	0	0.192527	0.0458486	0.375876	0.395676	9.57309	0.0019745	0.0432398
	ENSMUSG00000032845.15	Alpk2	16.5396	18.9112	22.1857	9.91822	8.53193	3.24942	18.7224	48.665	9.3447	17.3409	15.2173	19.9954	0.372536	10.6807	0.00108259	0.0270911
	ENSMUSG00000033501.4	Crygs	0	0	0	0	0	0	0.832241	0.329665	0	0.129101	0	0.290477	0.367904	10.3905	0.00126667	0.0306781
	ENSMUSG00000093537.1	Gm7584	0	0	0	0	0	0	0.462077	0.676723	0	0.126533	0	0.2847	0.361432	13.5429	0.000233174	0.00763539
	ENSMUSG00000023993.7	Treml1	0	0	0	0	0.314101	0	0.913989	0.380947	0.122796	0.192426	0.0628202	0.354433	0.349791	10.5219	0.00117969	0.0290385
	ENSMUSG00000047109.12	Cldn14	0	0	0	0	0	0.511442	0.318007	0.175361	0.087881	0.12141	0	0.273173	0.348428	17.4753	2.91057e-05	0.00132818
	ENSMUSG00000096271.1	Ccl21b	0	0	0	0	0	0	0	1.07684	0	0.119649	0	0.26921	0.343931	11.3996	0.00073461	0.01961
	ENSMUSG00000082334.1	Gm13244	0	0.020253	0.163114	0	0	1.11819	0.053828	0	0.075416	0.158978	0.0366734	0.311858	0.339651	9.29706	0.00229521	0.0481619
	ENSMUSG00000032671.5	A930018P22Rik	0	0	0	0	0	0	0	1.0611	0	0.1179	0	0.265275	0.339451	10.6186	0.00111958	0.0277724
	ENSMUSG00000055827.13	Gsdmc3	0	0	0	0	0	0	0.81349	0	0.232112	0.116178	0	0.2614	0.335026	25.7526	3.88094e-07	3.6128e-05
	ENSMUSG00000067147.7	Rpl7a-ps11	0.000129	0.00278	0.004249	0	0.004194	0	0.107434	0.930896	0.001367	0.116783	0.0022704	0.259924	0.330065	9.608	0.00193731	0.0426442
	ENSMUSG00000049537.10	Tecrl	0.032644	0	0.045682	0	0	0	0.324313	0.770135	0	0.130308	0.0156652	0.273612	0.326501	17.5663	2.77455e-05	0.00127063
	ENSMUSG00000082193.1	Rpl5-ps1	0	0	0	0	0	0.797297	0	0	0.210079	0.111931	0	0.251844	0.324055	9.5107	0.00204277	0.0443931
	ENSMUSG00000082794.1	Gm6806	0	0	0	0	0	0	0.675388	0.302639	0	0.10867	0	0.244507	0.315574	13.298	0.000265685	0.00852555
	ENSMUSG00000108705.1	Gm18905	0	0	0	0	0	0.751563	0	0.224503	0	0.108452	0	0.244016	0.315006	9.93212	0.0016242	0.0369595
	ENSMUSG00000052496.5	Pkdrej	0.020074	0.026167	0.127029	0.116546	0.209508	0.274461	0.376686	0.736914	0.026434	0.212647	0.0998648	0.353624	0.299501	9.70299	0.00183969	0.0410601
	ENSMUSG00000070797.4	Psg27	0	0	0.11329	0	0	0.610173	0.075702	0.181756	0.158962	0.126654	0.022658	0.256648	0.297257	12.3637	0.000437772	0.0129305
	ENSMUSG00000103460.1	Gm18491	0	0	0	0	0	0	0	0.913723	0	0.101525	0	0.228431	0.296817	17.9131	2.31225e-05	0.00109821
	ENSMUSG00000106664.1	Gm17936	0	0	0	0	0	0	0.693792	0.206968	0	0.100084	0	0.22519	0.293005	12.3709	0.000436067	0.0129056
	ENSMUSG00000078881.10	Gm14434	0	0	0	0	0	0	0.900734	0	0	0.100082	0	0.225184	0.292998	18.0093	2.19832e-05	0.001057
	ENSMUSG00000028784.14	Spocd1	0	0.031317	0.033742	0	0	0.182015	0.505868	0.270861	0	0.113756	0.0130118	0.239686	0.291324	20.019	7.66748e-06	0.000432351
	ENSMUSG00000059832.4	Kprp	0	0	0.077442	0	0	0.79345	0	0.155391	0	0.114031	0.0154884	0.23721	0.284917	15.9174	6.61668e-05	0.00266332
	ENSMUSG00000111942.1	Gm5182	0	0.136099	0.08503	0.025657	0.028421	0	1.01635	0.066962	0.053176	0.156855	0.0550414	0.284122	0.283483	14.7313	0.000123969	0.00454023
	ENSMUSG00000031603.14	Fgf20	0	0	0	0	0	0	0.36528	0.444026	0	0.0899229	0	0.202326	0.265829	12.3825	0.000433381	0.0128558
	ENSMUSG00000095042.1	Gm12537	0	0	0	0	0	0	0	0.784366	0	0.0871518	0	0.196092	0.258328	10.334	0.00130602	0.0313641
	ENSMUSG00000084347.3	Akt2-ps	0	0	0	0	0	0	0.230012	0.553173	0	0.0870206	0	0.195796	0.257972	15.2199	9.56923e-05	0.00362385
	ENSMUSG00000090527.2	Gm5538	0	0	0	0	0	0.416678	0	0.077689	0.271851	0.0851353	0	0.191554	0.252845	11.1015	0.000862559	0.0224406
	ENSMUSG00000113506.1	AC166358.2	0	0	0	0	0	0	0.09381	0.322011	0.300909	0.0796367	0	0.179182	0.237787	11.403	0.000733259	0.0195944
	ENSMUSG00000027702.7	Lrrc34	0	0	0.058397	0	0.115545	0	0.468287	0	0.382364	0.113844	0.0347884	0.212663	0.228843	9.28466	0.0023108	0.0484096
	ENSMUSG00000115505.1	AC123061.1	0	0	0	0	0	0	0.170504	0.509192	0	0.0755218	0	0.169924	0.226415	9.45641	0.00210413	0.0453415
	ENSMUSG00000109941.1	Exosc6	0	0	0	0	0	0.677483	0	0	0	0.0752759	0	0.169371	0.225732	10.2174	0.00139119	0.0328328
	ENSMUSG00000066364.2	Serpina3b	0	0	0.105358	0	0	0	0.211175	0.46489	0.049282	0.0923006	0.0210716	0.181337	0.210336	10.698	0.0010725	0.0269706
	ENSMUSG00000035916.8	Ptprq	0	0.037449	0.03035	0	0.066633	0	0.330026	0.408726	0	0.0970204	0.0268864	0.184688	0.206231	16.4984	4.86899e-05	0.0020367
	ENSMUSG00000025215.10	Tlx1	0	0	0	0	0	0.512239	0	0	0.098834	0.067897	0	0.152768	0.205103	14.5532	0.000136259	0.00489233
	ENSMUSG00000070719.4	Pla2g4d	0	0.077784	0.055891	0	0	0.603228	0.018655	0	0.104639	0.0955774	0.026735	0.181631	0.202715	10.6166	0.00112076	0.0277742
	ENSMUSG00000083898.2	Gm7340	0	0	0	0	0	0.33242	0	0	0.255454	0.0653193	0	0.146969	0.197826	18.3666	1.82229e-05	0.00090059
	ENSMUSG00000067771.9	Gm14685	0	0.031584	0.114143	0	0	0.123109	0.558959	0	0.021661	0.094384	0.0291454	0.175932	0.192358	10.614	0.00112235	0.0277742
	ENSMUSG00000083646.1	Gm6088	0	0.039629	0	0	0	0.273119	0.0849	0	0.241799	0.0710497	0.0079258	0.149954	0.190187	12.5859	0.000388675	0.0117474
	ENSMUSG00000031518.6	Spata4	0	0	0	0	0	0	0.553835	0	0	0.0615372	0	0.138459	0.187082	9.27201	0.00232682	0.0487053
	ENSMUSG00000022542.7	Sept12	0	0.038313	0.041259	0	0	0.266941	0.082664	0.132451	0.115829	0.075273	0.0159144	0.149471	0.178192	10.1196	0.00146697	0.034236
	ENSMUSG00000067206.3	Lrrc66	0.90608	0.692681	1.61947	0.430064	1.22491	0	2.46267	1.12639	1.31799	1.08669	0.974641	1.22676	0.173357	12.6268	0.00038025	0.0115742
	ENSMUSG00000029151.14	Slc30a3	0	0	0	0	0	0.29691	0	0.088437	0.103128	0.054275	0	0.122119	0.166225	12.1984	0.000478314	0.0139941
	ENSMUSG00000075402.1	Krt76	0	0	0	0	0	0	0.186447	0.298635	0	0.053898	0	0.121271	0.165134	16.0412	6.19799e-05	0.00251855
	ENSMUSG00000116022.1	Slfn2	0	0	0	0	0	0	0	0	0.468279	0.052031	0	0.11707	0.159719	10.3087	0.00132404	0.0315894
	ENSMUSG00000098754.7	Prn	0	0	0	0	0	0	0	0	0.465016	0.0516684	0	0.116254	0.158665	18.8639	1.40383e-05	0.000726852
	ENSMUSG00000025726.11	Slc28a1	0	0	0.073962	0	0	0	0.242009	0.207784	0.06922	0.0658861	0.0147924	0.129753	0.154823	11.2218	0.000808441	0.0212268
	ENSMUSG00000090021.1	Gm6493	0	0	0	0	0	0	0.216854	0	0.186661	0.044835	0	0.100879	0.138656	10.9933	0.000914427	0.0236458
	ENSMUSG00000074939.3	Chrm5	0	0	0	0	0	0	0.379532	0	0	0.0421702	0	0.094883	0.130777	10.3156	0.00131908	0.0315114
	ENSMUSG00000112906.1	Gm18189	0	0	0	0	0	0.121394	0.113123	0.1356	0	0.0411241	0	0.0925292	0.127672	10.6729	0.00108716	0.0271791
	ENSMUSG00000022875.17	Kng1	0	0	0	0	0	0	0.362399	0	0	0.0402666	0	0.0905998	0.125122	10.3156	0.00131908	0.0315114
	ENSMUSG00000110591.1	Gm31371	0	0	0	0	0	0	0	0.327491	0	0.0363879	0	0.0818727	0.113531	10.4313	0.00123894	0.0301779
	ENSMUSG00000020867.13	Spata20	0	0	0	0	0	0.309975	0	0	0	0.0344417	0	0.0774938	0.10768	10.1001	0.00148261	0.0344418
	ENSMUSG00000092120.1	Vmn2r90	0	0	0	0	0	0	0	0.197325	0.076694	0.0304466	0	0.0685048	0.0955933	10.7126	0.00106406	0.026811
	ENSMUSG00000091275.1	Gm3248	0	0	0	0	0	0	0.272433	0	0	0.0302703	0	0.0681082	0.0950579	9.98385	0.00157919	0.0359674
	ENSMUSG00000090863.1	A530084C06Rik	0	0	0	0	0	0	0	0.026135	0.238348	0.029387	0	0.0661208	0.0923708	11.862	0.000572906	0.0162779
	ENSMUSG00000043705.6	Capn13	0	0	0	0	0	0	0.244014	0	0	0.0271127	0	0.0610035	0.0854294	11.3118	0.000770174	0.0204316
	ENSMUSG00000101645.1	Gm28635	0	0	0	0	0	0.174122	0	0	0	0.0193469	0	0.0435305	0.0614728	10.7346	0.0010515	0.0265467
	ENSMUSG00000044581.8	4932415D10Rik	0.064405	0	0.012954	0.00535	0.185877	0	0.00864	0	0.006066	0.0314769	0.0537172	0.0036765	-0.0701934	13.7798	0.000205534	0.00694895
	ENSMUSG00000050818.7	Olfr330	0.026493	0	0	0.306238	0	0	0	0	0	0.0369701	0.0665462	0	-0.0929465	9.42305	0.00214275	0.0459802
	ENSMUSG00000067594.6	Krt77	0	0.033243	0	0.206805	0.106303	0	0	0	0	0.0384834	0.0692702	0	-0.0966265	9.38565	0.00218691	0.0466292
	ENSMUSG00000044375.7	BC027072	0.115156	0	0	0.133554	0.140079	0	0	0	0	0.0431988	0.0777578	0	-0.108033	16.4104	5.10035e-05	0.00212307
	ENSMUSG00000032360.16	Hcrtr2	0	0.126946	0	0.248423	0.027078	0	0	0	0	0.0447163	0.0804894	0	-0.111685	13.0586	0.000301895	0.00949448
	ENSMUSG00000091504.1	Vmn2r118	0.207497	0	0.083016	0	0.123206	0	0	0	0	0.0459688	0.0827438	0	-0.114692	10.3826	0.00127209	0.0307105
	ENSMUSG00000028749.7	Pla2g2f	0.123778	0	0.086638	0.214349	0	0	0	0	0	0.0471961	0.084953	0	-0.117633	10.2517	0.00136556	0.0323989
	ENSMUSG00000094539.3	Olfr191	0.01898	0	0	0.307788	0.131797	0	0	0.021389	0	0.0533282	0.091713	0.00534725	-0.1189	9.52531	0.00202657	0.0441534
	ENSMUSG00000093510.1	Vmn2r-ps21	0	0.033046	0	0.411168	0	0	0	0	0	0.0493571	0.0888428	0	-0.122796	11.8859	0.000565617	0.0161605
	ENSMUSG00000085924.1	Gm8980	0.070437	0	0.049257	0.324891	0	0	0	0	0	0.0493983	0.088917	0	-0.122894	9.48565	0.00207086	0.044889
	ENSMUSG00000000544.14	Gpa33	0.104047	0	0	0.349404	0	0	0	0	0	0.0503834	0.0906902	0	-0.125241	10.803	0.00101336	0.0257616
	ENSMUSG00000081778.1	Gm6325	0.095663	0.062242	0	0.110656	0.197803	0	0	0	0	0.0518182	0.0932728	0	-0.128653	12.6243	0.000380757	0.0115742
	ENSMUSG00000031552.13	Adam18	0	0.046142	0.099327	0.327566	0	0	0	0	0	0.0525594	0.094607	0	-0.130413	9.42782	0.00213718	0.0459378
	ENSMUSG00000028001.16	Fga	0	0	0	0.474323	0	0	0	0	0	0.0527026	0.0948646	0	-0.130752	9.38	0.00219365	0.0466292
	ENSMUSG00000102312.1	Pcdha3	0	0.027019	0.052022	0	0.4314	0	0	0	0	0.0567157	0.102088	0	-0.14024	18.0333	2.17078e-05	0.00104886
	ENSMUSG00000095295.8	Gm3488	0	0	0	0.546716	0	0	0	0	0	0.0607462	0.109343	0	-0.149706	9.86135	0.00168787	0.0380031
	ENSMUSG00000025002.5	Cyp2c55	0.235867	0	0.329595	0	0	0	0	0	0	0.0628291	0.113092	0	-0.154573	10.4218	0.0012454	0.0303062
	ENSMUSG00000047940.13	Stpg2	0	0.098719	0.106229	0.218923	0.157646	0	0	0	0	0.064613	0.116303	0	-0.158729	10.09	0.00149075	0.034568
	ENSMUSG00000017588.2	Krt27	0.634046	0	0	0	0	0	0	0	0	0.0704496	0.126809	0	-0.172243	10.5741	0.00114684	0.0282844
	ENSMUSG00000057228.6	Aadat	0.458859	0	0	0.175612	0	0	0	0	0	0.0704968	0.126894	0	-0.172352	10.4369	0.0012352	0.0301323
	ENSMUSG00000070683.7	Lactbl1	0	0.098883	0.035509	0	0.527009	0	0	0	0	0.073489	0.13228	0	-0.179231	14.1115	0.000172288	0.00597639
	ENSMUSG00000071745.1	DXBay18	0	0.070755	0	0.667049	0	0	0	0	0.047121	0.0872139	0.147561	0.0117803	-0.181675	10.0003	0.00156514	0.035711
	ENSMUSG00000022149.17	C9	0	0	0	0.263724	0.422019	0	0	0	0	0.0761937	0.137149	0	-0.185421	11.2719	0.000786906	0.0207465
	ENSMUSG00000025405.9	Inhbc	0	0.166094	0	0	0.530239	0	0	0	0	0.0773703	0.139267	0	-0.188105	10.0529	0.00152109	0.0351125
	ENSMUSG00000096576.2	Oog1	0	0	0	0	0.701535	0	0	0	0	0.0779483	0.140307	0	-0.189422	11.0589	0.000882631	0.0229162
	ENSMUSG00000071158.9	Gm156	0.23519	0.050909	0.054776	0.316058	0.054192	0	0	0	0	0.0790139	0.142225	0	-0.191847	12.7548	0.000355104	0.0109526
	ENSMUSG00000044220.13	Nkx2-3	0	0	0	0.721703	0	0	0	0	0	0.0801892	0.144341	0	-0.194517	13.0107	0.000309716	0.00969283
	ENSMUSG00000069248.11	Serpinb6e	0	0	0.230735	0.506694	0	0	0	0	0	0.0819366	0.147486	0	-0.198476	9.43758	0.00212583	0.0457322
	ENSMUSG00000092094.5	Zfp804b	0	0	0.137967	0.0949	0.56884	0	0	0.03693	0	0.0931819	0.160341	0.0092325	-0.201291	12.7506	0.000355893	0.0109637
	ENSMUSG00000116073.1	LT629150.1	0.316366	0.166827	0.297654	0.011439	0	0	0	0.021247	0	0.0903926	0.158457	0.00531175	-0.204562	15.5267	8.13462e-05	0.00316965
	ENSMUSG00000098615.4	Arvcf	0	0	0.790038	0	0	0	1.4e-05	0.006585	0	0.0885152	0.158008	0.00164975	-0.209267	19.0059	1.30317e-05	0.00068363
	ENSMUSG00000038498.3	Catsper1	0	0	0	0.785531	0	0	0	0	0	0.0872812	0.157106	0	-0.210521	13.5537	0.000231837	0.00763539
	ENSMUSG00000037157.8	Il22ra1	0.384185	0	0.082766	0.204787	0.122835	0	0	0	0	0.0882859	0.158915	0	-0.212774	17.1426	3.46761e-05	0.00153849
	ENSMUSG00000114593.1	Gm19716	0.543034	0.028303	0.224416	0	0	0	0	0	0	0.088417	0.159151	0	-0.213068	13.5497	0.000232325	0.00763539
	ENSMUSG00000053054.13	Adh6a	0.163421	0.128058	0.045899	0.112479	0.346667	0	0	0	0	0.0885027	0.159305	0	-0.21326	12.7774	0.000350823	0.0108467
	ENSMUSG00000030963.6	Umod	0.797232	0	0	0	0	0	0	0	0	0.0885813	0.159446	0	-0.213436	19.0439	1.27748e-05	0.000672489
	ENSMUSG00000061517.8	Sox21	0	0.085843	0.108294	0.044686	0.642941	0	0	0	0.050688	0.103606	0.176353	0.012672	-0.216154	11.6952	0.000626625	0.0173423
	ENSMUSG00000020524.16	Gria1	0.455181	0	0	0.108717	0.332618	0	0.012554	0.045326	0	0.106044	0.179303	0.01447	-0.217208	15.4477	8.482e-05	0.00326525
	ENSMUSG00000055194.3	Actbl2	0.055102	0	0.308774	0	0.458266	0	0	0	0	0.0913491	0.164428	0	-0.219622	15.817	6.9772e-05	0.00278653
	ENSMUSG00000081314.1	Gm14132	0.047546	0	0.199611	0.376014	0.200417	0	0	0	0	0.0915098	0.164718	0	-0.21998	11.4972	0.000697012	0.0188421
	ENSMUSG00000089840.1	Gm4491	0.107927	0	0.300683	0.123815	0.297441	0	0	0	0	0.0922073	0.165973	0	-0.221535	10.197	0.00140666	0.0331283
	ENSMUSG00000096899.1	Gm8346	0	0	0	0	0.851553	0	0	0	0	0.094617	0.170311	0	-0.226891	11.0521	0.000885881	0.0229773
	ENSMUSG00000067028.11	Cntnap5b	0	0	0	0	0.908745	0	0.017073	0.020537	0	0.105151	0.181749	0.0094025	-0.227422	12.7364	0.000358605	0.011034
	ENSMUSG00000048981.1	Krt31	0	0	0.14383	0.710816	0	0	0	0	0	0.0949607	0.170929	0	-0.227654	11.322	0.000765936	0.0203402
	ENSMUSG00000108022.1	Gm7298	0	0	0	0.10803	0.77702	0	0.014557	0	0	0.0999563	0.17701	0.00363925	-0.229886	17.7518	2.51678e-05	0.00118003
	ENSMUSG00000076438.5	Oxct2b	0	0	0.358615	0.318854	0.191419	0	0	0	0	0.0965431	0.173778	0	-0.231159	11.7243	0.00061689	0.017138
	ENSMUSG00000034918.8	Cdhr2	0	0.114909	0.173426	0.347618	0.245152	0	0	0	0	0.0979006	0.176221	0	-0.234159	22.566	2.03042e-06	0.000146419
	ENSMUSG00000063305.10	Psg20	0	0	0	0	0.883442	0	0	0	0	0.0981602	0.176688	0	-0.234732	9.36614	0.00221031	0.0468022
	ENSMUSG00000094941.1	Gm15093	0.193434	0	0	0	0.694398	0	0	0	0	0.098648	0.177566	0	-0.235808	13.7492	0.000208913	0.00703706
	ENSMUSG00000115365.1	AC158779.2	0	0.262486	0.056479	0.465512	0.111752	0	0	0	0	0.099581	0.179246	0	-0.237864	13.6203	0.000223755	0.00745851
	ENSMUSG00000113258.1	Gm7446	0.220911	0.199817	0.107653	0.173431	0.206326	0	0	0	0	0.100904	0.181628	0	-0.240775	9.46612	0.00209302	0.04514
	ENSMUSG00000050463.9	Krt78	0	0	0.090423	0.522291	0.298238	0	0	0	0	0.101217	0.18219	0	-0.241462	20.6842	5.41605e-06	0.000320748
	ENSMUSG00000105897.1	Gm7646	0	0.162465	0	0	0.776469	0	0	0	0	0.104326	0.187787	0	-0.248276	9.38751	0.00218469	0.0466292
	ENSMUSG00000104148.5	Pcdha2	0	0.026782	0	0	0.928472	0	0	0	0	0.106139	0.191051	0	-0.252235	24.1434	8.94207e-07	7.1213e-05
	ENSMUSG00000037033.9	Clca3b	0.264155	0	0	0.331191	0.397278	0	0	0.024787	0	0.113046	0.198525	0.00619675	-0.252347	16.8544	4.03598e-05	0.00174235
	ENSMUSG00000040154.11	Wfdc5	0	0	0	0	0.961918	0	0	0	0	0.10688	0.192384	0	-0.253848	15.0688	0.000103662	0.00386844
	ENSMUSG00000023120.9	Gm853	0	0	0.092952	0.65149	0.229912	0	0	0	0	0.108262	0.194871	0	-0.256855	16.5564	4.72242e-05	0.00198512
	ENSMUSG00000037130.4	H2-M10.6	0.297028	0	0	0.680492	0	0	0	0	0	0.108613	0.195504	0	-0.257619	12.1032	0.000503362	0.0146165
	ENSMUSG00000019892.13	Lrriq1	0.162766	0.035791	0.125607	0.127457	0.536877	0	0	0	0	0.109833	0.1977	0	-0.260266	22.2967	2.33609e-06	0.000165146
	ENSMUSG00000049229.5	Olfr844	0	0	0	0	0.989557	0	0	0	0	0.109951	0.197911	0	-0.260521	11.8565	0.000574618	0.0163084
	ENSMUSG00000096197.1	4930555G01Rik	0.889134	0.049088	0	0.03195	0.020737	0	0	0	0	0.110101	0.198182	0	-0.260847	18.3271	1.86041e-05	0.000914134
	ENSMUSG00000091624.1	Vmn2r9	0	0.077592	0	0.5513	0.372021	0	0	0	0	0.111213	0.200183	0	-0.263254	17.8608	2.37669e-05	0.00112257
	ENSMUSG00000053747.9	Sox14	0.268688	0	0.093305	0.230348	0.418085	0	0	0	0	0.11227	0.202085	0	-0.265539	12.6436	0.00037686	0.0114989
	ENSMUSG00000038064.7	Cldn22	1.01794	0	0	0	0	0	0	0	0	0.113104	0.203588	0	-0.267342	9.86509	0.00168444	0.0379593
	ENSMUSG00000066867.8	Oas1e	0	0.614978	0	0.559885	0	0	0	0	0.076639	0.139056	0.234973	0.0191597	-0.277099	9.22483	0.00238755	0.0494908
	ENSMUSG00000020007.4	Il20ra	0	0	0.225764	0	0.836947	0	0	0	0	0.118079	0.212542	0	-0.278035	12.4735	0.000412761	0.0123587
	ENSMUSG00000030954.10	Gp2	0.470888	0.166715	0.219981	0	0.217635	0	0	0	0	0.119469	0.215044	0	-0.281008	16.1869	5.7391e-05	0.00234698
	ENSMUSG00000078354.1	Ifna2	0.176277	0	0	0.901587	0	0	0	0	0	0.119763	0.215573	0	-0.281636	9.46631	0.0020928	0.04514
	ENSMUSG00000020583.4	Matn3	0	0	0	0	1.20308	0	0.046391	0	0.032515	0.142443	0.240616	0.0197265	-0.282874	10.1869	0.00141443	0.0332808
	ENSMUSG00000096852.2	Cyp2d12	0.194504	0	0.053205	0.224746	0.616972	0	0	0	0	0.121047	0.217885	0	-0.284378	21.6748	3.23014e-06	0.000210411
	ENSMUSG00000074065.4	Gm10617	0	0	0.207075	0.936819	0	0	0	0	0	0.127099	0.228779	0	-0.297225	10.7087	0.00106634	0.0268419
	ENSMUSG00000103092.1	Pcdha5	0.097534	0	0	0.364406	0.777109	0	0.016427	0.040682	0	0.144018	0.24781	0.0142773	-0.298946	17.2267	3.31742e-05	0.00148213
	ENSMUSG00000070980.4	Actl7b	0	0	0	0.993548	0.159151	0	0	0	0	0.128078	0.23054	0	-0.299291	13.0081	0.00031015	0.00969455
	ENSMUSG00000115848.1	AC114008.2	0.313373	0	0	0.222147	0.634988	0	0	0	0	0.130056	0.234102	0	-0.303461	12.363	0.000437921	0.0129305
	ENSMUSG00000056270.3	Prr9	0	0	0	1.17844	0	0	0	0	0	0.130938	0.235688	0	-0.305315	11.2823	0.000782505	0.0206517
	ENSMUSG00000024105.2	Themis3	0.088729	0	0.371559	0.204117	0.551371	0	0	0	0	0.135086	0.243155	0	-0.314006	15.2943	9.19917e-05	0.00349924
	ENSMUSG00000051663.4	Pcdhb1	0.117247	0.038116	0.164192	0.744814	0.162454	0	0	0	0	0.136314	0.245365	0	-0.316568	21.2491	4.03302e-06	0.000251818
	ENSMUSG00000018486.2	Wnt9b	0.224506	0.083552	0.630597	0.408975	0.044571	0	0.030062	0.054255	0.021085	0.1664	0.27844	0.0263505	-0.316861	14.1529	0.000168535	0.00587806
	ENSMUSG00000084395.1	Gm15087	0	0	0.103537	0	1.12644	0	0	0	0	0.136664	0.245995	0	-0.317299	10.0411	0.0015309	0.0352612
	ENSMUSG00000075159.5	Olfr1110	0.14127	0.091919	0.297119	0.326854	0.620643	0	0.044083	0.053004	0.061799	0.181855	0.295561	0.0397215	-0.31738	9.47169	0.00208667	0.0451347
	ENSMUSG00000074228.2	Gm10645	0	0.287846	0	0	0.949037	0	0	0	0	0.137431	0.247377	0	-0.318897	9.50703	0.00204686	0.044444
	ENSMUSG00000060989.8	Gm11847	0	0.884281	0	0	0.357178	0	0	0	0	0.13794	0.248292	0	-0.319955	10.0657	0.00151058	0.0349645
	ENSMUSG00000048830.3	2310057N15Rik	0.624912	0.376402	0.245005	0	0	0	0	0	0	0.13848	0.249264	0	-0.321078	10.6443	0.00110409	0.0274414
	ENSMUSG00000007440.10	Pcdha11	0.069364	0	0.18076	0.417772	0.900437	0	0.079041	0.058664	0.062146	0.196465	0.313667	0.0499628	-0.323261	9.39286	0.00217832	0.0465874
	ENSMUSG00000070568.12	Slc6a21	0	0	0.18553	0.825309	0.248292	0	0	0	0	0.139903	0.251826	0	-0.324034	11.3592	0.000750732	0.0199779
	ENSMUSG00000083421.1	Gm14776	0.975498	0.139558	0.149243	0	0	0	0	0	0	0.140478	0.25286	0	-0.325225	9.80484	0.00174054	0.0390514
	ENSMUSG00000094559.2	Cyp2d34	0	0.183094	0.203727	0.503501	0.375196	0	0	0	0	0.140613	0.253104	0	-0.325506	13.1546	0.000286816	0.00909851
	ENSMUSG00000113670.1	AC166341.1	0	0.232274	0.166308	1.0301	0	0	0	0.068827	0	0.16639	0.285736	0.0172067	-0.337982	9.46944	0.00208923	0.0451347
	ENSMUSG00000042244.4	Pglyrp3	0	0	0.222633	0	1.10092	0	0	0	0	0.147061	0.264711	0	-0.338807	10.0618	0.00151375	0.0349746
	ENSMUSG00000081660.1	Gm11787	0	0	1.32911	0	0	0	0	0	0	0.147679	0.265822	0	-0.340075	9.69846	0.00184423	0.0411085
	ENSMUSG00000075334.2	Rprm	0	0	0	0	1.32947	0	0	0	0	0.147719	0.265894	0	-0.340157	12.9884	0.000313419	0.00977288
	ENSMUSG00000081067.1	Gm12912	1.33721	0	0	0	0	0	0	0	0	0.148579	0.267442	0	-0.34192	16.5887	4.6427e-05	0.00196025
	ENSMUSG00000116024.1	AC157554.2	0	0.038925	0.900662	0	0.404658	0	0	0	0	0.149361	0.268849	0	-0.34352	10.6515	0.00109979	0.0273878
	ENSMUSG00000072931.4	Gm15080	0.197608	0	0.272738	0	0.912482	0	0	0	0	0.153648	0.276566	0	-0.352268	18.2817	1.9053e-05	0.000934402
	ENSMUSG00000021743.6	Fezf2	0	0.145392	0	0.758124	0.55459	0	0	0	0.041202	0.16659	0.291621	0.0103005	-0.354399	13.1389	0.000289233	0.00916383
	ENSMUSG00000081618.2	5033423K11Rik	0	0	0	1.2913	0.103516	0	0	0	0	0.15498	0.278963	0	-0.354975	12.4505	0.000417876	0.0124616
	ENSMUSG00000040569.13	Slc26a7	0.264524	0.018139	0.058685	0	1.60901	0	0.013054	0.324824	0	0.254248	0.390072	0.0844695	-0.35817	14.2474	0.000160284	0.00562863
	ENSMUSG00000073842.10	Mup7	0.572973	0	0.637087	0.23082	0	0	0	0	0	0.160098	0.288176	0	-0.36533	10.9359	0.00094321	0.0243164
	ENSMUSG00000095196.1	Gm8305	0	0	0	1.32991	0.149901	0	0	0	0	0.164423	0.295962	0	-0.374024	13.2822	0.000267945	0.00858497
	ENSMUSG00000103255.1	Pcdhac1	0.135967	0.026325	0.12707	0.775552	0.574815	0.061891	0.015578	0.019263	0	0.19294	0.327946	0.024183	-0.374723	18.6611	1.56132e-05	0.00078836
	ENSMUSG00000031089.7	Slc6a14	0.623708	0.027995	0.090508	0.17426	0.567184	0	0	0	0	0.164851	0.296731	0	-0.374879	29.2268	6.43811e-08	7.84836e-06
	ENSMUSG00000081884.1	Gm11821	0.427232	0	0.156918	0	0.9262	0	0	0	0	0.167817	0.30207	0	-0.380807	10.8158	0.00100637	0.0256095
	ENSMUSG00000039488.15	Cntn5	0.084527	0	0.078933	0	1.39921	0	0.026356	0	0	0.176558	0.312534	0.006589	-0.38288	23.451	1.28134e-06	9.9703e-05
	ENSMUSG00000025922.9	Gm5045	0	0	0	1.52946	0	0	0	0	0	0.16994	0.305892	0	-0.385036	9.3826	0.00219054	0.0466292
	ENSMUSG00000046095.5	Krt32	0	0	0	1.5696	0	0	0	0	0	0.1744	0.31392	0	-0.393877	11.8761	0.000568602	0.0161916
	ENSMUSG00000096806.2	Olfr312	0.116503	0.379218	0.217998	0.494739	0.512307	0.029412	0.01819	0.043758	0	0.201347	0.344153	0.02284	-0.394117	16.8582	4.02799e-05	0.00174183
	ENSMUSG00000022304.13	Dpys	0.525817	0.090552	0	0	1.07737	0	0	0	0.048228	0.193552	0.338748	0.012057	-0.403594	13.4296	0.000247682	0.00803634
	ENSMUSG00000083140.1	Gm5073	0.970186	0	0	0	0.658584	0	0	0	0	0.180974	0.325754	0	-0.406813	10.3863	0.00126954	0.0307105
	ENSMUSG00000024512.3	Dynap	1.26766	0	0.195514	0	0.19338	0	0	0	0	0.184062	0.331311	0	-0.412847	16.4413	5.01805e-05	0.00209563
	ENSMUSG00000108366.1	Gm5586	0.933676	0	0.726132	0	0	0	0	0	0	0.184423	0.331962	0	-0.413552	10.138	0.0014524	0.0339557
	ENSMUSG00000037469.9	Acp7	0	0	0.05547	0	1.61143	0	0	0	0	0.185211	0.33338	0	-0.415088	11.8777	0.000568101	0.0161916
	ENSMUSG00000093701.7	Gm21970	0	0	1.67523	0	0	0	0	0	0	0.186137	0.335046	0	-0.416889	9.71178	0.00183091	0.0408998
	ENSMUSG00000053797.10	Krt16	0.835702	0.067724	0.436708	0	0.576285	0	0	0	0.136115	0.228059	0.383284	0.0340288	-0.419821	11.5202	0.000688452	0.0186699
	ENSMUSG00000109893.1	Gm9655	0.202837	0	0.185069	0.387295	0.921484	0	0	0	0	0.188521	0.339337	0	-0.421519	14.8752	0.000114865	0.00423101
	ENSMUSG00000102891.1	Gm19114	0	0	0	0	1.70848	0	0	0	0	0.189831	0.341696	0	-0.424058	14.5695	0.000135082	0.00487054
	ENSMUSG00000041608.8	Entpd3	0.363449	0.250461	0.239926	3.24189	0.771555	1.54272	0.214833	0.096311	0.028073	0.749913	0.973456	0.470484	-0.424433	12.4983	0.000407333	0.0122105
	ENSMUSG00000026639.18	Lamb3	177.989	245.779	248.757	332.304	329.314	171.734	175.481	226.893	219.235	236.387	266.829	198.336	-0.42611	9.24507	0.0023613	0.0491059
	ENSMUSG00000114229.1	Gm47072	0.91459	0	0	0.460304	0.415684	0	0	0	0	0.198953	0.358116	0	-0.441606	12.8604	0.000335609	0.0104014
	ENSMUSG00000060615.5	Ang4	0.151014	0	0	1.68753	0	0	0	0	0	0.204283	0.367709	0	-0.451761	9.42305	0.00214275	0.0459802
	ENSMUSG00000037653.7	Kctd8	0	0.05533	0.119031	0.882856	1.17758	0	0.024571	0.190949	0	0.272257	0.446959	0.05388	-0.457314	10.3957	0.00126308	0.0306492
	ENSMUSG00000021789.14	Sftpa1	0	0	0	0	1.87534	0	0	0	0	0.208371	0.375068	0	-0.459503	10.0203	0.00154821	0.035447
	ENSMUSG00000029211.11	Gabra4	0	0	0.063227	0	1.82184	0	0	0	0	0.209452	0.377013	0	-0.461543	23.716	1.11652e-06	8.74092e-05
	ENSMUSG00000100141.1	Gm6445	0.479368	0.309701	0	0	1.09683	0	0	0	0	0.209544	0.37718	0	-0.461717	14.3827	0.000149164	0.00529625
	ENSMUSG00000003469.9	Phyhip	0.45004	0.206623	1.9644	2.20322	0.256924	0	0.198162	0.148874	1.49511	0.769261	1.01624	0.460537	-0.46517	10.9144	0.000954171	0.0245495
	ENSMUSG00000079598.3	Clec2l	0.116681	0.453525	0.324765	0.401092	0.722816	0	0	0.06508	0	0.231551	0.403776	0.01627	-0.466029	12.66	0.000373568	0.0114121
	ENSMUSG00000051793.4	Olfr284	0.48161	0	0	0	1.44639	0	0	0	0	0.214222	0.3856	0	-0.470511	12.6652	0.000372528	0.0114076
	ENSMUSG00000044835.15	Ankrd45	0	0	0.223267	0.29756	1.48213	0	0.018515	0.022269	0	0.227082	0.400591	0.010196	-0.471401	14.6688	0.000128151	0.00467999
	ENSMUSG00000042250.13	Pglyrp4	0.387853	0	0.394633	0.381234	0.780647	0	0	0	0	0.216041	0.388873	0	-0.473915	21.8453	2.95538e-06	0.000196004
	ENSMUSG00000085893.1	Gm12091	0	0.15574	0.336057	0.140261	1.34114	0	0	0	0	0.219244	0.39464	0	-0.479892	10.331	0.00130814	0.0313724
	ENSMUSG00000058921.3	Slc10a5	0.298218	0.170062	0.183131	0.863645	0.833728	0.112957	0.034937	0	0.048982	0.282851	0.469757	0.049219	-0.486262	15.5558	8.01049e-05	0.00312754
	ENSMUSG00000110404.1	Rnf223	0.025774	0.234716	0.794667	1.10253	0.42888	0.155855	0.072357	0	0.101418	0.324022	0.517313	0.0824075	-0.487275	10.1623	0.0014334	0.033657
	ENSMUSG00000090665.2	Gad1-ps	0.269865	0.291861	1.06716	0.051726	0.558916	0	0	0	0.117423	0.261883	0.447906	0.0293557	-0.492226	13.5805	0.000228549	0.00757881
	ENSMUSG00000083440.1	Rpl7a-ps12	2.03422	0	0	0	0	0	0	0	0	0.226024	0.406844	0	-0.492462	13.1922	0.000281114	0.00895089
	ENSMUSG00000043144.6	Aqp6	0.759074	0.098447	0.243779	0.419038	0.562665	0	0	0	0	0.231445	0.416601	0	-0.502433	20.8742	4.90454e-06	0.000294733
	ENSMUSG00000086926.2	Gm6226	1.41376	0.34931	0.230825	0	0.110334	0	0	0	0	0.233803	0.420846	0	-0.50675	17.9313	2.29023e-05	0.00108977
	ENSMUSG00000029306.8	Ibsp	0	0	0.052737	0	2.13917	0	0.035234	0	0	0.24746	0.438381	0.0088085	-0.511794	17.7626	2.50249e-05	0.00117548
	ENSMUSG00000105554.1	Gm7118	0	0.118138	1.39179	0.831779	0	0	0	0	0.118151	0.273318	0.468341	0.0295378	-0.512191	9.60322	0.00194236	0.0426975
	ENSMUSG00000034159.12	2310007B03Rik	0.263215	0	0.210255	0.216658	1.50812	0	0.035119	0	0	0.248152	0.43965	0.00877975	-0.513106	19.5469	9.81604e-06	0.000534661
	ENSMUSG00000039110.14	Mycbpap	0.684372	1.56128	1.8678	4.63049	7.33864	3.21666	0.202799	3.07837	1.31732	2.6553	3.21652	1.95379	-0.513486	10.7898	0.00102061	0.0258944
	ENSMUSG00000093504.1	Vmn1r-ps24	0.955806	0	0	1.44135	0	0	0	0	0.136547	0.281523	0.479431	0.0341368	-0.516616	10.217	0.00139155	0.0328328
	ENSMUSG00000044814.6	Olfr543	0.569784	0.221506	0.237957	0.980915	0.428973	0	0.159135	0	0	0.288697	0.487827	0.0397837	-0.516923	9.56212	0.00198634	0.0434247
	ENSMUSG00000080073.2	Gm9427	0	0	0	1.92399	0.232486	0	0	0	0	0.239608	0.431295	0	-0.517321	9.37874	0.00219516	0.0466292
	ENSMUSG00000027202.12	Slc12a1	2.1944	0	0	0	0	0	0	0	0	0.243822	0.43888	0	-0.524946	43.5151	4.20702e-11	1.30139e-08
	ENSMUSG00000081470.1	Gm14131	0	0.386209	0.206395	0.826253	0.797725	0	0	0	0	0.246287	0.443316	0	-0.529388	10.1107	0.00147414	0.0343698
	ENSMUSG00000095538.1	Gm21983	0	0	0	2.21911	0	0	0	0	0	0.246568	0.443822	0	-0.529893	22.9182	1.69048e-06	0.000125803
	ENSMUSG00000087121.1	Gm7847	0	0	0	1.62241	0.644854	0	0	0	0	0.251918	0.453453	0	-0.539484	11.6513	0.000641593	0.0176421
	ENSMUSG00000047295.16	Smgc	0	0.180136	0	0.6732	1.42463	0	0	0	0	0.253107	0.455593	0	-0.541607	15.5702	7.94961e-05	0.00312611
	ENSMUSG00000079374.2	Gm8334	0	0	0.339066	0	1.94546	0	0	0	0	0.253836	0.456905	0	-0.542907	20.6981	5.37686e-06	0.000319368
	ENSMUSG00000105872.1	Gm9515	0	0	0	2.33131	0	0	0	0	0	0.259034	0.466262	0	-0.552143	10.0357	0.00153537	0.0353148
	ENSMUSG00000075217.1	4833423E24Rik	0.135632	0	0.047437	0.273799	1.87734	0	0	0	0	0.259356	0.466842	0	-0.552713	26.5092	2.62288e-07	2.64353e-05
	ENSMUSG00000082740.1	Gm14127	0	0	0	1.26432	1.09064	0	0	0	0	0.261662	0.470992	0	-0.556789	10.0293	0.00154071	0.0354058
	ENSMUSG00000107211.1	Gm5864	0	0	0	2.36627	0	0	0	0	0	0.262919	0.473254	0	-0.559006	15.4783	8.34571e-05	0.00322734
	ENSMUSG00000050063.18	Klk6	0.223972	0	1.24245	0.936819	0	0	0	0	0	0.267027	0.480648	0	-0.566229	17.7842	2.47427e-05	0.00116436
	ENSMUSG00000033156.9	Cst10	0	0.249004	0.790479	0.863512	0.507978	0	0	0	0	0.267886	0.482195	0	-0.567735	10.1195	0.00146707	0.034236
	ENSMUSG00000022229.3	Atp12a	0	0.048186	0.129855	1.11457	1.15643	0	0	0	0	0.272116	0.489808	0	-0.575127	37.249	1.03967e-09	2.12924e-07
	ENSMUSG00000008461.6	Fut1	0.274736	0.124583	0.550851	1.34284	0.90261	0	0.056743	0.034012	0.308758	0.399459	0.639124	0.0998783	-0.575581	14.1556	0.000168296	0.00587773
	ENSMUSG00000038932.13	Tcfl5	0.939469	0.14409	0.662133	0.48047	0.912863	0	0.139961	0	0.227175	0.389573	0.627805	0.091784	-0.57624	13.0942	0.00029621	0.00935017
	ENSMUSG00000089727.2	Klra8	1.81864	1.49872	0	0	0	0	0	0	0.452254	0.418846	0.663472	0.113063	-0.579662	9.26419	0.00233677	0.048794
	ENSMUSG00000033770.13	Clcnka	0.597963	0	0.044052	0	2.53281	0.189973	0	0.185787	0	0.394509	0.634965	0.09394	-0.579726	10.6477	0.00110205	0.0274174
	ENSMUSG00000101226.1	Gm20954	0	0.225131	0.478703	0.587124	1.18261	0	0	0	0	0.274841	0.494714	0	-0.579869	9.42148	0.00214458	0.0459809
	ENSMUSG00000110331.1	Nudc-ps1	1.95735	0.560514	0	0	0	0	0	0	0	0.279763	0.503573	0	-0.588395	9.31981	0.00226689	0.047842
	ENSMUSG00000040420.15	Cdh18	0	0.208071	0	1.81303	0.694553	0	0.104366	0	0	0.313336	0.543131	0.0260915	-0.588701	16.12	5.94544e-05	0.00242748
	ENSMUSG00000022986.5	Krt75	0	0	0.127381	0	2.39475	0	0	0	0	0.280237	0.504426	0	-0.589213	32.9261	9.5728e-09	1.59132e-06
	ENSMUSG00000039518.7	Cdsn	0.282223	0	0.592973	1.56512	0.860496	0	0.343192	0.063456	0	0.41194	0.660162	0.101662	-0.591643	9.81077	0.00173493	0.0389598
	ENSMUSG00000097821.1	C130032M10Rik	0.434795	0	0	2.10887	0	0	0	0	0	0.282629	0.508733	0	-0.593338	12.5882	0.000388188	0.0117466
	ENSMUSG00000112802.1	Gm19005	0.224613	0.289062	0.772547	0	1.52772	0	0	0.123537	0	0.326387	0.562788	0.0308842	-0.60024	9.20833	0.00240917	0.0498986
	ENSMUSG00000053550.13	Shisa7	0.381486	2.00647	0.819266	0.34347	0.264769	0	0.039696	0.454446	0.139151	0.494306	0.763092	0.158323	-0.60607	10.8641	0.00098045	0.0250494
	ENSMUSG00000025774.14	Crisp4	0	0	0	2.86361	0.132587	0	0.089832	0.107277	0	0.354812	0.599239	0.0492773	-0.60799	9.69762	0.00184506	0.0411085
	ENSMUSG00000078680.3	Mup10	0	0	2.70061	0	0	0	0	0	0	0.300068	0.540122	0	-0.623045	12.5218	0.000402232	0.0120717
	ENSMUSG00000023387.8	Kcnk16	0	0.133502	0	2.27427	0.303254	0	0	0	0	0.301225	0.542205	0	-0.624995	28.7415	8.27125e-08	9.75779e-06
	ENSMUSG00000071763.9	4933416I08Rik	1.07129	0	0	0	1.65068	0	0	0	0	0.302441	0.544394	0	-0.627041	12.1843	0.000481925	0.0140676
	ENSMUSG00000031952.5	Chst5	0	0.138354	0.148913	0.286473	2.75016	0	0.03316	0.079653	0.185763	0.402497	0.66478	0.074644	-0.631473	11.6838	0.000630477	0.0174187
	ENSMUSG00000062546.4	V1ra8	1.18663	0	0	1.58539	0	0	0	0	0	0.308002	0.554404	0	-0.636362	17.0167	3.70534e-05	0.00162426
	ENSMUSG00000073975.3	Olfr550	0.349852	0.338711	0.316715	1.78965	1.43553	0.090361	0.127339	0.484201	0.039034	0.552377	0.846092	0.185234	-0.639303	9.29962	0.00229201	0.0481341
	ENSMUSG00000099453.1	Gm18248	0	0	0	0	2.79146	0	0	0	0	0.310162	0.558292	0	-0.639966	24.9078	6.0138e-07	5.26897e-05
	ENSMUSG00000081094.4	Rpl19-ps11	0	1.74225	1.08002	0	0	0	0	0	0	0.313586	0.564454	0	-0.645659	9.2644	0.0023365	0.048794
	ENSMUSG00000031981.7	Capn9	0	0	0.461196	0.03803	2.45352	0	0.061612	0	0	0.334929	0.590549	0.015403	-0.647473	9.92798	0.00162785	0.0370098
	ENSMUSG00000089678.8	Agxt2	1.72227	0.336476	0.837211	1.10284	0.421262	0	0.040654	0.5398	0.214418	0.579437	0.884012	0.198718	-0.652316	11.7235	0.000617162	0.017138
	ENSMUSG00000060879.3	Gm6564	1.6964	0	0.765697	0.208524	0.252213	0	0	0	0	0.324759	0.584567	0	-0.664088	11.7519	0.00060782	0.0169686
	ENSMUSG00000090098.7	Alms1-ps2	0.548389	0.305437	1.2183	0.728476	1.54477	0	0.510455	0	0.174305	0.558904	0.869074	0.17119	-0.674349	11.7463	0.000609647	0.0169826
	ENSMUSG00000024771.7	Lipk	0	0	0.153421	1.03485	1.79636	0	0	0	0	0.331626	0.596926	0	-0.675298	28.9951	7.25619e-08	8.72105e-06
	ENSMUSG00000025105.9	Bnc1	0.295802	0.02028	0.415469	0.45125	1.9474	0	0.043781	0	0.020473	0.354939	0.62604	0.0160635	-0.678372	29.2754	6.27867e-08	7.69062e-06
	ENSMUSG00000107310.1	Gm7452	0.398823	0.123704	0.241118	1.45128	1.04223	0	0.028709	0	0.083209	0.374341	0.651431	0.0279795	-0.683905	21.9946	2.73425e-06	0.000186162
	ENSMUSG00000078917.3	Gm11281	0.855374	0	0.28846	0.473262	1.42587	0	0	0	0	0.338107	0.608593	0	-0.6858	10.2427	0.00137224	0.032467
	ENSMUSG00000091956.2	C2cd4b	0.44692	0	0.177496	0.657422	2.10682	0	0	0	0.165903	0.394951	0.677732	0.0414757	-0.687883	14.509	0.000139495	0.00498057
	ENSMUSG00000114700.1	Gm19010	1.78501	0.505054	0	0	0.794313	0	0	0	0	0.342709	0.616875	0	-0.693209	11.7075	0.000622481	0.0172649
	ENSMUSG00000047844.3	Bex4	1.29496	0.151399	0.485326	0.439487	1.01345	0	0	0.146125	0	0.392305	0.676924	0.0365313	-0.694054	11.5871	0.000664121	0.0181253
	ENSMUSG00000040514.6	Tex47	0	0	0.072982	0.18782	3.14454	0	0.121831	0.02929	0	0.395163	0.681068	0.0377803	-0.695877	12.0669	0.000513255	0.0148467
	ENSMUSG00000105898.1	Obox4-ps32	2.19192	0.925118	0	0	0	0	0	0	0	0.346338	0.623408	0	-0.699025	10.4667	0.00121548	0.0297479
	ENSMUSG00000086225.1	Gm8661	0.185835	0.119868	0.641805	2.10935	0.126937	0	0	0	0	0.353755	0.636759	0	-0.710842	18.8799	1.39215e-05	0.000724373
	ENSMUSG00000041735.8	Gm13178	0	0	0.195514	2.45282	0.695843	0	0	0.078318	0	0.380277	0.668835	0.0195795	-0.710867	10.8488	0.000988611	0.0252076
	ENSMUSG00000038259.4	Gdf5	0.066238	0.172186	0.463416	0.993525	2.33833	0	0.309547	0.074372	0	0.490846	0.806739	0.0959798	-0.721167	11.435	0.000720754	0.0193972
	ENSMUSG00000081392.1	Gm11668	0	0	0	1.20165	2.07231	0	0	0	0	0.363773	0.654792	0	-0.72665	12.9976	0.00031189	0.00973704
	ENSMUSG00000094012.1	Gm10024	0	0	0	3.27757	0	0	0	0	0	0.364174	0.655514	0	-0.727279	10.6693	0.0010893	0.0272059
	ENSMUSG00000096878.2	Gm21083	0	0.545561	0.129588	2.61372	0	0	0	0	0	0.36543	0.657774	0	-0.729247	21.5612	3.4271e-06	0.000219334
	ENSMUSG00000103124.1	Gm37389	3.469	0	0.335843	0	0	0	0.247269	0	0	0.450235	0.760969	0.0618172	-0.729834	17.1759	3.40732e-05	0.00151436
	ENSMUSG00000103856.1	Gm2474	0	0	0	0	3.29701	0	0	0	0	0.366334	0.659402	0	-0.730663	9.36614	0.00221031	0.0468022
	ENSMUSG00000054453.11	Sytl5	0.034542	0.044888	0.859125	1.85109	1.29072	0	0.22594	0.150114	0	0.495158	0.816073	0.0940135	-0.731192	12.4407	0.000420073	0.01249
	ENSMUSG00000033214.10	Slitrk5	0.478044	0.038923	0.323551	0.17323	3.82023	0	0.619571	0.101115	0	0.617185	0.966796	0.180172	-0.736851	10.6001	0.00113083	0.0279432
	ENSMUSG00000027849.18	Syt6	0.375157	0.446691	0.752266	2.33623	0.296516	0	0.031962	0.120156	0.266272	0.513917	0.841372	0.104597	-0.73726	10.1554	0.00143881	0.0336994
	ENSMUSG00000025081.13	Tdrd1	0	0.199609	0.240205	0.250326	3.57344	0.023652	0.099866	0.190292	0.104945	0.520259	0.852716	0.104689	-0.746002	13.5163	0.000236495	0.00772227
	ENSMUSG00000020871.8	Dlx4	0.153411	0.265258	0.236024	0.11742	2.69968	0	0	0	0	0.385755	0.694359	0	-0.760739	28.8928	7.64949e-08	9.15079e-06
	ENSMUSG00000082308.1	Gm15770	0	1.32645	0.281284	1.60706	0.277893	0	0	0	0	0.388076	0.698537	0	-0.764293	11.3497	0.000754583	0.0200595
	ENSMUSG00000029236.4	Nmu	0	0	1.47832	1.21281	1.13681	0	0	0	0.15324	0.442353	0.765588	0.03831	-0.765911	11.7021	0.000624284	0.0172962
	ENSMUSG00000079494.2	Nat8f5	0.468408	0.725053	0.258791	0.850504	1.40755	0.090092	0	0	0	0.422266	0.742061	0.022523	-0.768662	15.8855	6.72929e-05	0.00270015
	ENSMUSG00000040891.6	Foxa3	0.806058	0.299137	0.053647	0.265336	3.50298	0.0578	0.250908	0.301268	0.050187	0.620813	0.985432	0.165041	-0.769072	9.41935	0.00214708	0.045996
	ENSMUSG00000096646.1	CR974586.6	0	0.527817	2.99432	0	0	0	0	0	0	0.391349	0.704427	0	-0.769287	24.2604	8.41497e-07	6.90459e-05
	ENSMUSG00000095280.1	Gm21738	2.9731	0	1.31538	0	0	0	0	0	0.33281	0.513477	0.857696	0.0832025	-0.778211	10.2448	0.00137073	0.0324613
	ENSMUSG00000075170.4	Olfr1097	3.88284	0.56282	0.492599	0.095547	0.321122	0.199848	0.282137	0.150233	0.196053	0.687022	1.07099	0.207068	-0.778811	13.2403	0.000273995	0.00875689
	ENSMUSG00000116379.1	LT629154.16	0.827474	1.60284	0	0	1.16359	0	0	0	0	0.399323	0.718781	0	-0.781386	20.4737	6.04579e-06	0.000350163
	ENSMUSG00000114678.1	Gm48481	0.52848	0	0.352229	0.286608	2.43483	0	0	0	0	0.400239	0.720429	0	-0.782769	9.47672	0.00208095	0.0450697
	ENSMUSG00000026343.6	Gpr39	0	0.109528	0.117965	1.39465	2.56604	0.212034	0	0	0.036798	0.493002	0.837637	0.062208	-0.790785	15.5021	8.24122e-05	0.00320144
	ENSMUSG00000109564.1	Muc16	0.598433	0.209621	0.888558	1.72166	0.452245	0	0.03446	0.051861	0.012092	0.440992	0.774103	0.0246033	-0.792025	29.3519	6.03559e-08	7.53713e-06
	ENSMUSG00000063971.7	Krt88	1.90569	0.136358	0.291709	1.55676	0.288443	0	0	0.233297	0	0.490251	0.835792	0.0583243	-0.794621	13.376	0.000254865	0.00823806
	ENSMUSG00000115302.1	AC013548.1	0	0.071883	0	0	4.976	0.322006	0.202409	0.108071	0	0.631152	1.00958	0.158121	-0.795105	10.8727	0.00097593	0.0249838
	ENSMUSG00000101795.2	Gm5835	1.02486	0	0.188093	1.38906	1.11311	0	0	0	0	0.412791	0.743025	0	-0.801593	25.6043	4.19109e-07	3.88739e-05
	ENSMUSG00000028148.11	Them5	0	0	0.381728	3.28599	0.849525	0	0	0	0.356735	0.541553	0.903449	0.0891838	-0.805368	13.568	0.000230074	0.00761167
	ENSMUSG00000073077.6	Gm7173	1.34216	0.771889	0.791811	0.429394	1.9413	0.280728	0.306903	0.008436	0.104391	0.664112	1.05531	0.175115	-0.806555	14.6765	0.00012763	0.0046676
	ENSMUSG00000036731.7	Cysrt1	0.554246	0	0.610207	1.75761	1.05587	0	0.102272	0	0	0.453356	0.795587	0.025568	-0.808032	10.742	0.00104733	0.0264676
	ENSMUSG00000084328.1	Gm14046	3.83577	0	0	0	0	0	0	0	0	0.426197	0.767154	0	-0.821428	12.0416	0.000520265	0.0150155
	ENSMUSG00000038567.5	Cyp24a1	0.786099	0.16158	0.377307	1.50886	1.17746	0	0.0775	0	0	0.454312	0.802261	0.019375	-0.822123	30.5745	3.21288e-08	4.47009e-06
	ENSMUSG00000028972.11	Car6	0.052152	0	0.396867	0.598585	2.8038	0	0	0	0	0.427934	0.770281	0	-0.823978	26.4197	2.74723e-07	2.73654e-05
	ENSMUSG00000055452.6	Gm7353	0	0	1.58147	1.07613	1.87698	0	0.308237	0	0	0.538091	0.906916	0.0770592	-0.824144	15.7245	7.32689e-05	0.00290804
	ENSMUSG00000104215.1	Rpl13-ps4	0	0	0	2.44466	1.4778	0	0	0	0	0.435829	0.784492	0	-0.835513	13.5458	0.000232809	0.00763539
	ENSMUSG00000078179.1	Rnf148	0.834784	0.450018	0.869224	0.556267	1.91054	0	0.129257	0.077378	0.090254	0.546414	0.924167	0.0742223	-0.840941	13.6089	0.000225114	0.00748431
	ENSMUSG00000096688.1	Mup17	0	0	3.79778	0	0.161067	0	0	0	0	0.439872	0.791769	0	-0.841385	18.8648	1.40319e-05	0.000726852
	ENSMUSG00000059668.6	Krt4	0.254939	0.047317	1.12033	3.27465	0.25191	0	0.272169	0.163428	0	0.598305	0.989829	0.108899	-0.843516	14.0142	0.000181434	0.00621782
	ENSMUSG00000027317.8	Ppp1r14d	0.901703	0	0.176606	1.59288	1.57138	0	0.118495	0	0	0.484563	0.848514	0.0296238	-0.844249	13.246	0.000273162	0.0087412
	ENSMUSG00000074445.4	Sprr2a3	0.716986	0	0	2.8639	0.432299	0.001149	0.003341	0.001774	0.007516	0.447441	0.802637	0.003445	-0.845147	22.2102	2.44371e-06	0.000171395
	ENSMUSG00000084320.2	Gm14125	0	0.175528	1.2029	1.79802	1.20672	0	0	0	0.174589	0.506417	0.876634	0.0436472	-0.846513	10.8237	0.00100208	0.0255257
	ENSMUSG00000083376.1	Gm11882	1.36871	0	0	2.66586	0	0	0	0	0	0.448286	0.806914	0	-0.853528	11.508	0.000692963	0.0187525
	ENSMUSG00000011632.7	Pinlyp	0.349557	0.149874	0.480483	2.75979	0.31671	0	0	0	0	0.450713	0.811283	0	-0.857012	19.2886	1.12378e-05	0.000600599
	ENSMUSG00000029829.4	Tmem213	0.182451	0	0	0	3.91049	0	0	0	0	0.454771	0.818588	0	-0.862819	13.0351	0.000305701	0.00959062
	ENSMUSG00000030292.10	Smco2	0	0	0	0	4.17286	0	0	0	0	0.463651	0.834572	0	-0.875444	11.2641	0.000790221	0.0207697
	ENSMUSG00000055561.9	Spink5	0.165997	0.019659	0.381559	0.209979	3.52394	0	0	0.034046	0.019846	0.483892	0.860227	0.013473	-0.876171	36.3928	1.61301e-09	3.03626e-07
	ENSMUSG00000092167.8	Gm3696	0	1.65047	1.83249	0	1.79963	0	0.460461	0	0	0.638117	1.05652	0.115115	-0.883011	13.7423	0.000209682	0.00704914
	ENSMUSG00000053654.7	Krt42	0	0	0.117424	3.37857	0.73274	0	0	0	0	0.469859	0.845747	0	-0.884205	26.9439	2.09449e-07	2.18853e-05
	ENSMUSG00000024386.8	Proc	0	0	0.509108	3.59422	0.287786	0	0	0	0.068006	0.495458	0.878223	0.0170015	-0.885046	24.9406	5.91252e-07	5.20139e-05
	ENSMUSG00000047161.12	Chst9	1.22222	0.105804	0.398389	1.45415	1.52036	0	0.07606	0	0.065346	0.538037	0.940185	0.0353515	-0.906073	24.2387	8.5107e-07	6.96083e-05
	ENSMUSG00000053216.15	Btn2a2	0	0.85241	1.18631	2.57991	1.18638	0	0.174165	0.334629	0.097552	0.712373	1.161	0.151587	-0.908078	13.1298	0.000290629	0.00919667
	ENSMUSG00000083226.1	Gm7831	0.462404	0	0.931032	1.77045	1.22588	0	0	0	0	0.487752	0.877953	0	-0.909161	12.5982	0.000386115	0.0117116
	ENSMUSG00000036136.9	Fam110c	0.579251	0.125623	0.609063	2.59622	1.67401	0	0.203327	0.298784	0	0.676253	1.11683	0.125528	-0.911306	15.4736	8.36661e-05	0.00322737
	ENSMUSG00000028635.7	Edn2	0.453558	0.146941	0	1.81978	2.42036	0	0.052783	0.126541	0	0.557774	0.968128	0.044831	-0.913554	18.8617	1.40544e-05	0.000726852
	ENSMUSG00000078154.3	Gm12184	0.628432	1.03381	0	3.55289	0	0	0	0	0.333186	0.61648	1.04303	0.0832965	-0.91528	16.5041	4.85461e-05	0.00203401
	ENSMUSG00000049436.4	Upk1b	0.225929	0	0.189186	0.415699	3.74318	0	0.042148	0	0	0.512905	0.914799	0.010537	-0.922071	26.3237	2.88731e-07	2.84289e-05
	ENSMUSG00000109560.1	Gm8463	0	0.488465	0	4.02525	0	0	0	0	0	0.501524	0.902743	0	-0.928081	15.1154	0.000101136	0.00379074
	ENSMUSG00000094464.2	Olfr339	1.7224	3.54169	1.6827	0.094479	0.875264	0.190614	0.262661	0.538574	0.422268	1.03674	1.58331	0.353529	-0.932493	9.29129	0.00230246	0.0482743
	ENSMUSG00000073878.3	Gm13304	0	0	0	2.65468	1.94306	0	0	0	0	0.51086	0.919548	0	-0.940767	19.9276	8.04291e-06	0.000451532
	ENSMUSG00000028591.11	Pramef12	0.186088	0	0.173667	2.65393	1.58939	0	0	0	0	0.511453	0.920615	0	-0.941568	31.0411	2.52625e-08	3.59289e-06
	ENSMUSG00000018459.15	Slc13a3	0.737006	0.596075	0.989831	2.39262	3.57996	0.284989	0.718707	0.38868	0.109864	1.08864	1.6591	0.37556	-0.950918	10.3918	0.00126577	0.0306781
	ENSMUSG00000022303.9	Dcstamp	14.9303	7.43604	9.74188	8.39244	35.4305	8.10075	5.647	8.36943	7.34914	11.7108	15.1862	7.36658	-0.952057	11.4676	0.000708213	0.0191247
	ENSMUSG00000082039.2	Gm15653	1.05058	0	0.723793	2.61501	0.286289	0	0	0	0	0.519519	0.935134	0	-0.952434	22.8948	1.71114e-06	0.000126972
	ENSMUSG00000073295.4	Nudt11	0.612353	0.069398	0.310199	0.654006	3.97547	0	0.356696	0	0.032259	0.66782	1.12429	0.0972387	-0.9531	16.9802	3.77724e-05	0.00164451
	ENSMUSG00000114650.1	Gm47570	0	1.142	0.801032	0	2.76779	0	0	0	0	0.523425	0.942164	0	-0.957665	10.0945	0.00148713	0.0345154
	ENSMUSG00000105492.1	Gm2505	1.20207	0.154546	0	0	3.75443	0	0	0	0.154025	0.585008	1.02221	0.0385062	-0.961422	15.3094	9.12598e-05	0.00348694
	ENSMUSG00000001168.16	Oas1h	1.46468	0.613009	0.794357	3.44285	2.60813	0.780487	0.265755	0.558842	0.06164	1.17664	1.78461	0.416681	-0.974958	9.73647	0.00180647	0.0403893
	ENSMUSG00000048399.4	Tprg	1.65197	0	1.37228	0	1.80956	0	0	0	0	0.53709	0.966762	0	-0.975822	26.1504	3.15827e-07	3.04836e-05
	ENSMUSG00000081603.1	Gm14681	4.22776	0.618736	0	0	0	0	0	0	0	0.5385	0.969299	0	-0.977682	9.65691	0.00188641	0.041739
	ENSMUSG00000068085.6	Cyp2d11	0	0.066463	0	0	4.78569	0	0	0	0	0.539128	0.970431	0	-0.978511	30.5035	3.33267e-08	4.5869e-06
	ENSMUSG00000038415.10	Foxq1	1.20688	0.737604	1.507	1.55501	1.69834	0.452019	0.041905	0	0.258243	0.828556	1.34097	0.188042	-0.978519	15.5969	7.83843e-05	0.00309666
	ENSMUSG00000081546.1	Gm14927	0	0	0.453357	4.40604	0	0	0	0	0	0.539933	0.971879	0	-0.979571	10.6892	0.00107764	0.0270498
	ENSMUSG00000035371.8	Ssx9	0.791042	0.318193	1.21801	0	2.53888	0	0	0	0	0.540681	0.973225	0	-0.980555	14.5816	0.000134219	0.00485311
	ENSMUSG00000024922.1	Ovol1	0.336076	0.302689	0.315043	2.68989	1.93634	0	0.196645	0.029081	0.042032	0.649755	1.11601	0.0669395	-0.987866	21.8454	2.95528e-06	0.000196004
	ENSMUSG00000114610.1	Cyp2c52-ps	0.970251	0.517705	0.635598	1.89717	1.96478	0	0.106265	0.318436	0	0.712245	1.1971	0.106175	-0.990021	15.4135	8.63699e-05	0.00331992
	ENSMUSG00000047253.4	Krtap1-5	0.087127	0	0	0	4.88631	0	0	0	0	0.552604	0.994687	0	-0.996163	23.4013	1.31492e-06	0.000101698
	ENSMUSG00000006204.6	5430419D17Rik	1.3013	0.535698	3.50414	1.12001	0.851375	0.43207	0.277206	0.060271	0.164933	0.916334	1.4625	0.23362	-0.997228	12.3509	0.000440768	0.0129846
	ENSMUSG00000082027.1	Gm11416	0.676062	0.145001	1.39506	3.0532	0.919579	0	0.311778	0	0.144645	0.738369	1.23778	0.114106	-1.00618	11.827	0.000583776	0.0164952
	ENSMUSG00000092511.7	Gm20547	0.092656	0.723956	1.32388	3.09154	0.401115	0	0.208644	0	0	0.649088	1.12663	0.052161	-1.01521	24.7538	6.5139e-07	5.59583e-05
	ENSMUSG00000009394.13	Syn2	8.39723	16.4627	23.7142	34.7765	23.49	9.10897	5.93551	8.98196	16.0795	16.3274	21.3681	10.0265	-1.02047	9.63057	0.00191365	0.0423052
	ENSMUSG00000029273.10	Sult1d1	3.61864	0.29318	0	0.473999	0.91865	0	0	0	0	0.589385	1.06089	0	-1.04327	39.3114	3.61332e-10	8.33342e-08
	ENSMUSG00000115768.1	DPEP2NB	0	0	0.112618	5.74112	0	0	0	0	0.210399	0.673793	1.17075	0.0525998	-1.04424	19.5692	9.70192e-06	0.000529572
	ENSMUSG00000051956.4	Rnf133	0	0.753864	0.538901	3.49415	2.23369	0.194161	0.236173	0.144768	0.084426	0.853348	1.40412	0.164882	-1.04533	12.5935	0.000387084	0.011727
	ENSMUSG00000043681.5	Fam25c	0	0	0	4.18894	1.13865	0	0	0	0	0.591954	1.06552	0	-1.0465	9.37748	0.00219667	0.0466292
	ENSMUSG00000000216.8	Scnn1g	0.5998	0.26013	1.05092	1.67619	2.39162	0	0.02339	0.224956	0	0.69189	1.19573	0.0620865	-1.0478	24.5222	7.34599e-07	6.12565e-05
	ENSMUSG00000107705.1	Gm45062	5.12091	0	0	0.278062	0	0	0	0	0	0.599886	1.07979	0	-1.05644	66.1249	4.23232e-16	1.08347e-12
	ENSMUSG00000096834.7	Gm15127	1.13977	0	0.816837	0.789983	2.67638	0	0	0	0	0.602552	1.08459	0	-1.05977	38.8554	4.56387e-10	1.01992e-07
	ENSMUSG00000044707.7	Ccnjl	0.650725	0.588728	5.14112	9.00357	5.06707	3.59434	0.317576	1.01594	0.822498	2.91129	4.09024	1.43759	-1.06228	9.76225	0.00178132	0.0398617
	ENSMUSG00000074852.3	Hpse2	1.48133	0.291289	0.814471	2.47801	2.04536	0.269841	0.293116	0.050248	0	0.858185	1.42209	0.153301	-1.07048	15.8302	6.92891e-05	0.00277157
	ENSMUSG00000094111.1	Nutf2-ps2	4.72489	0.793549	0	0	0	0	0	0	0	0.61316	1.10369	0	-1.07292	9.25442	0.00234928	0.0489448
	ENSMUSG00000037140.6	Tas2r108	2.34917	0.349781	0.124885	1.23158	2.47005	0	0.167308	0.199935	0	0.765857	1.30509	0.0918107	-1.0781	15.9676	6.44368e-05	0.00260598
	ENSMUSG00000060967.6	Etd	0	0	0	0	5.62882	0	0	0	0	0.625424	1.12576	0	-1.08798	11.2641	0.000790221	0.0207697
	ENSMUSG00000059256.6	Gzmd	0	0	0	0	5.66969	0	0	0	0	0.629966	1.13394	0	-1.09352	23.6808	1.13714e-06	8.87524e-05
	ENSMUSG00000017049.4	Ccdc70	0	0.250156	0.118581	3.85655	1.45643	0	0	0	0	0.631302	1.13634	0	-1.09514	26.1326	3.18761e-07	3.05628e-05
	ENSMUSG00000099655.2	2310034G01Rik	0.795793	0.237849	0.340556	1.47183	3.45286	0	0.227796	0	0	0.725187	1.25978	0.056949	-1.09628	19.6223	9.43625e-06	0.000519501
	ENSMUSG00000114234.1	Gm3131	0	0.398086	0	0	5.29362	0	0	0	0	0.632412	1.13834	0	-1.09649	11.284	0.000781768	0.0206517
	ENSMUSG00000055976.6	Cldn23	1.20239	0.055745	0.35976	4.10129	1.30501	0.322869	0.040071	0.048093	0	0.826136	1.40484	0.102758	-1.12482	21.4259	3.67766e-06	0.00023304
	ENSMUSG00000049252.17	Lrp1b	0.086304	0.266712	0.732361	2.44024	4.78069	0.257076	0.114286	0.428689	0.067536	1.01932	1.66126	0.216897	-1.1289	20.1319	7.22823e-06	0.000410294
	ENSMUSG00000038980.1	Rbbp8nl	0.828378	0.64601	0.463639	2.67616	2.70643	0	0.061939	0.037204	0.390431	0.867799	1.46412	0.122394	-1.1345	19.5955	9.5692e-06	0.000524413
	ENSMUSG00000104445.1	Rhbg	0	0	0.140384	4.93142	1.33903	0	0.075926	0.068805	0	0.728396	1.28217	0.0361827	-1.13913	27.4202	1.63715e-07	1.76839e-05
	ENSMUSG00000089937.1	Gm7281	0	0	0.324452	1.30184	4.41843	0	0	0	0	0.671636	1.20894	0	-1.14336	14.6053	0.000132538	0.00480591
	ENSMUSG00000019852.7	Arfgef3	1.03474	0.482747	1.5799	3.83894	4.02575	0.504142	0.431286	0.151107	0.67241	1.41345	2.19242	0.439736	-1.14884	11.2973	0.000776207	0.020549
	ENSMUSG00000113501.1	Gm18940	2.00178	0.572559	1.6834	2.00977	0.151317	0	0.102598	0	0	0.724603	1.28377	0.0256495	-1.15488	20.9168	4.79671e-06	0.000290986
	ENSMUSG00000104602.1	Gm42779	0	0.561645	0	3.29616	2.30448	0	0	0	0	0.684698	1.23246	0	-1.15863	10.0401	0.00153166	0.0352612
	ENSMUSG00000034107.10	Ano7	2.28271	0.226902	1.29054	4.72821	0.74207	0.801327	0.086471	0	0.220866	1.15323	1.85409	0.277166	-1.16008	13.5436	0.000233084	0.00763539
	ENSMUSG00000104959.1	Gm18131	3.54209	0	0	0	2.74756	0	0	0	0	0.69885	1.25793	0	-1.175	12.9028	0.000328086	0.010193
	ENSMUSG00000032207.10	Lipc	0.372065	0.120694	2.20622	2.19201	2.1009	0	0.076696	0	0.121373	0.798884	1.39838	0.0495172	-1.19233	22.4206	2.19009e-06	0.000156173
	ENSMUSG00000001095.5	Slc13a2	0.538991	0.288515	0.621278	1.86638	4.25892	0	0.118562	0.178058	0.083048	0.88375	1.51482	0.094917	-1.19963	21.8175	2.99852e-06	0.000197841
	ENSMUSG00000022763.17	Aifm3	0.831585	0.340864	0.890831	4.15089	4.75039	0.688034	0.37281	0.392055	0.074632	1.38801	2.19291	0.381883	-1.20824	11.2643	0.000790125	0.0207697
	ENSMUSG00000051748.2	Wfdc21	1.15088	0	2.50052	0	2.95999	0	0	0	0	0.734599	1.32228	0	-1.21554	11.5099	0.000692269	0.0187525
	ENSMUSG00000020905.11	Usp43	1.63067	1.64928	3.04801	10.2215	10.0803	0.74078	2.73257	2.96292	0.438371	3.72271	5.32595	1.71866	-1.21839	9.67977	0.00186308	0.0414195
	ENSMUSG00000021751.13	Acox2	1.69312	1.3891	2.6512	2.18434	6.69005	0.982901	0.725189	0.746178	0.27216	1.92603	2.92156	0.681607	-1.22159	11.2859	0.000780984	0.0206517
	ENSMUSG00000096519.1	Gm10721	1.10678	0.444994	0.197803	5.40944	0.337086	0	0	0.285221	0	0.864592	1.49922	0.0713053	-1.22211	15.499	8.25488e-05	0.00320189
	ENSMUSG00000054169.7	Ceacam10	0	0.226848	0.480077	8.36139	2.80449	0	1.13509	0	0.640182	1.51645	2.37456	0.443818	-1.22481	11.4437	0.000717378	0.0193518
	ENSMUSG00000015652.9	Steap1	0.49146	0.363314	0.4873	3.76881	2.98829	0	0.391315	0.078081	0	0.952063	1.61983	0.117349	-1.2294	16.6714	4.4447e-05	0.00189233
	ENSMUSG00000074300.4	BC030870	2.00561	1.54461	1.79139	6.1827	1.50533	0	0.819151	0.635057	0.692784	1.68629	2.60593	0.536748	-1.23049	9.3179	0.00226926	0.0478512
	ENSMUSG00000091255.1	Speer4e	0.710319	0.301599	0.763746	2.1811	2.79037	0	0	0	0	0.749682	1.34943	0	-1.23231	38.0668	6.8362e-10	1.47064e-07
	ENSMUSG00000109222.1	Gm10297	2.90105	0	1.1072	2.8094	0	0	0	0	0	0.757517	1.36353	0	-1.24094	22.1549	2.51516e-06	0.000175007
	ENSMUSG00000028778.15	Hcrtr1	1.07653	0.26678	0.954319	5.38489	4.31909	0.307585	0.590205	0.764607	0.082029	1.52734	2.40032	0.436107	-1.24351	12.0722	0.000511783	0.0148373
	ENSMUSG00000037798.7	Mat1a	0	0.357386	1.3341	2.96757	2.26105	0	0	0.026064	0	0.771797	1.38402	0.006516	-1.24403	29.9574	4.4164e-08	5.79795e-06
	ENSMUSG00000095493.2	A630023A22Rik	0	0.173359	0	3.95865	2.7465	0	0	0	0	0.764279	1.3757	0	-1.24835	24.6486	6.87931e-07	5.80516e-05
	ENSMUSG00000094993.2	Igkv4-51	0	0.606526	6.29699	0	0	0	0	0	0	0.767057	1.3807	0	-1.25139	9.58296	0.00196392	0.0430448
	ENSMUSG00000017724.14	Etv4	3.27303	3.21224	5.22054	15.9526	14.8019	0.247866	6.93307	2.62767	2.10559	6.04161	8.49206	2.97855	-1.25448	9.33761	0.00224498	0.0474188
	ENSMUSG00000020617.13	1700012B07Rik	2.16767	0.665591	0.426582	3.37308	2.60657	0	0	0.113735	0.659063	1.11248	1.8479	0.193199	-1.25506	18.7726	1.47266e-05	0.000755514
	ENSMUSG00000029154.13	Cwh43	1.36052	0.369031	0.583865	3.40746	1.24591	0	0	0	0	0.774087	1.39336	0	-1.25904	48.9507	2.62484e-12	1.4093e-09
	ENSMUSG00000097106.1	Rpl31-ps23	0	0	0.654935	6.31332	0	0	0	0	0	0.774251	1.39365	0	-1.25921	10.689	0.00107777	0.0270498
	ENSMUSG00000036813.11	Entpd8	1.35428	1.80074	2.04747	2.54837	1.45586	0.370055	0	0	0.357024	1.10376	1.84134	0.18177	-1.26562	13.8458	0.000198437	0.00674632
	ENSMUSG00000039092.9	Sptlc3	1.35261	0.045069	1.30984	2.99992	2.01587	0.052286	0.097222	0.077851	0	0.883408	1.54466	0.0568398	-1.26772	28.7884	8.07323e-08	9.61277e-06
	ENSMUSG00000026645.11	Olah	0.335438	1.01438	0.389221	1.21794	4.13193	0	0	0	0	0.787657	1.41778	0	-1.27368	36.7953	1.31209e-09	2.52552e-07
	ENSMUSG00000069805.10	Fbp1	0.670875	0.072456	1.39728	1.48768	3.89266	0	0.052056	0.062403	0	0.848379	1.50419	0.0286148	-1.28364	24.9025	6.03051e-07	5.26897e-05
	ENSMUSG00000095210.2	Ighv5-9-1	0	0	6.34336	0	0.854273	0	0	0	0	0.799737	1.43953	0	-1.2866	10.4557	0.0012227	0.0298674
	ENSMUSG00000106114.1	Gm43286	1.6239	0	0	4.68461	2.08031	0	0.358014	0	0	0.97187	1.67776	0.0895035	-1.29736	9.26719	0.00233296	0.0487938
	ENSMUSG00000100441.1	Gm7266	0.455898	3.40572	0.589454	2.84191	0	0	0	0	0	0.810331	1.4586	0	-1.29783	11.4236	0.000725181	0.0194394
	ENSMUSG00000095429.1	Ighv5-12	7.30698	0	0	0	0	0	0	0	0	0.811887	1.4614	0	-1.29948	9.86509	0.00168444	0.0379593
	ENSMUSG00000091049.8	Gm1979	0.208616	0.809927	0	3.00264	3.44774	0	0	0	0	0.82988	1.49378	0	-1.31834	44.0284	3.2365e-11	1.09991e-08
	ENSMUSG00000039131.15	Gipc2	24.8018	21.0202	38.5828	92.0433	34.1654	24.9325	13.2198	9.5052	17.2432	30.6127	42.1227	16.2252	-1.32393	9.66533	0.00187778	0.0416562
	ENSMUSG00000081972.1	Gm16397	0	0	0	0	7.52752	0	0	0	0	0.836391	1.5055	0	-1.3251	14.5616	0.000135652	0.00488424
	ENSMUSG00000044626.12	Liph	0.948678	0.779494	0.922372	6.40555	3.87832	0.158721	0.499792	0.542604	0.509444	1.62722	2.58688	0.42764	-1.3291	12.5542	0.000395313	0.0119059
	ENSMUSG00000060882.5	Kcnd2	0.055837	0.436502	0.23536	2.91447	5.47312	0.127083	0.065443	0.204768	0.091819	1.06716	1.82306	0.122278	-1.33083	24.3148	8.18089e-07	6.75583e-05
	ENSMUSG00000024774.15	Ankrd22	0	0.118295	0.506856	5.41364	3.00692	0	0	0.101351	0.354578	1.05574	1.80914	0.113982	-1.3344	14.1234	0.000171205	0.00595622
	ENSMUSG00000009356.12	Lpo	0	0	6.56365	0.562373	0.781008	0	0	0	0.067159	0.886021	1.58141	0.0167897	-1.34414	16.8198	4.11022e-05	0.00177141
	ENSMUSG00000055471.6	Alk	0.252032	0.077256	1.24959	6.41262	0.824339	0.112443	0.138988	0.03345	0.019499	1.01336	1.76317	0.076095	-1.36052	31.5099	1.98421e-08	2.95324e-06
	ENSMUSG00000113444.1	Gm48672	7.90728	0	0	0	0	0	0	0	0	0.878587	1.58146	0	-1.36819	10.5741	0.00114684	0.0282844
	ENSMUSG00000048500.2	Defb15	0	0	0	7.95052	0	0	0	0	0	0.883391	1.5901	0	-1.37301	9.38	0.00219365	0.0466292
	ENSMUSG00000110574.1	Gm21112	0	0	0	0	8.00702	0	0	0	0	0.889669	1.6014	0	-1.37929	18.3715	1.81753e-05	0.000899974
	ENSMUSG00000030359.14	Pzp	7.00688	0.495834	0.486669	4.37603	2.64177	0.591651	0.743959	0.520092	0.266928	1.90331	3.00144	0.530658	-1.38637	11.9591	0.0005438	0.0155893
	ENSMUSG00000022176.11	Rem2	0.82877	0.738538	1.62273	1.78053	4.58496	0.126328	0.039191	0.081024	0.204221	1.11181	1.91111	0.112691	-1.38751	21.4131	3.70242e-06	0.00023403
	ENSMUSG00000032262.13	Elovl4	1.56094	0.668107	1.46596	4.97006	4.93859	0	0.652543	0.854468	0.166244	1.69743	2.72073	0.418314	-1.39141	17.3495	3.1098e-05	0.0014016
	ENSMUSG00000026322.8	Htr4	0.590124	0.080918	0.719806	5.09544	1.94255	0	0.014557	0.070065	0	0.94594	1.68577	0.0211555	-1.39513	45.9566	1.20904e-11	4.68963e-09
	ENSMUSG00000106964.5	FO907130.1	1.84893	1.22325	2.4914	7.81444	0.437529	0	0	1.68317	0	1.72208	2.76311	0.420793	-1.40523	9.84542	0.00170255	0.0383
	ENSMUSG00000068748.7	Ptprz1	7.45276	1.01915	2.48315	5.16076	11.2325	0.475064	3.43079	1.54131	0.315089	3.67895	5.46966	1.44056	-1.40648	9.24708	0.00235871	0.0490919
	ENSMUSG00000035852.11	Misp	0.937302	2.73183	0.423733	5.39681	9.22219	0.143395	1.94805	0.671154	0.392401	2.42965	3.74237	0.78875	-1.40666	11.683	0.000630747	0.0174187
	ENSMUSG00000079112.1	Fam90a1a	0	0.163257	0.526848	5.93409	2.02696	0	0	0	0.109512	0.973407	1.73023	0.027378	-1.41006	35.2999	2.82648e-09	5.13176e-07
	ENSMUSG00000022156.8	Gzme	0	0	0	0	8.33257	0	0	0	0	0.925841	1.66651	0	-1.41495	28.1879	1.10093e-07	1.25262e-05
	ENSMUSG00000045744.10	Bricd5	0.461188	0	0	4.99446	2.90123	0	0	0	0	0.928542	1.67138	0	-1.41758	24.7813	6.42185e-07	5.54819e-05
	ENSMUSG00000100257.1	C4bp-ps1	3.49646	0.778722	0.829625	7.30283	1.43503	0	0.83585	0.603897	0.193287	1.71952	2.76853	0.408259	-1.42009	11.0228	0.000899963	0.0233189
	ENSMUSG00000056632.7	Dsg3	2.62143	0.180968	1.13475	0.597812	4.7322	0.21681	0	0	0.047181	1.05902	1.85343	0.0659977	-1.42049	35.6421	2.37109e-09	4.33571e-07
	ENSMUSG00000083710.1	Gm15078	0	0.166985	0.712961	2.63047	4.93394	0	0	0	0	0.938262	1.68887	0	-1.427	26.1544	3.15178e-07	3.04836e-05
	ENSMUSG00000024215.13	Spdef	0.610401	0.195812	0.908005	4.76527	4.10395	0	0.121869	0.244107	0.246411	1.24398	2.11669	0.153097	-1.4345	18.8431	1.41923e-05	0.000732503
	ENSMUSG00000110461.1	Gm45860	8.55521	0	0	0	0	0	0	0	0	0.950579	1.71104	0	-1.43885	9.86509	0.00168444	0.0379593
	ENSMUSG00000058354.7	Krt6a	3.92164	0.043937	3.58938	0.626424	1.21925	0	0	0.113855	0.132761	1.07192	1.88013	0.061654	-1.43982	33.2622	8.05327e-09	1.36532e-06
	ENSMUSG00000030510.11	Cers3	1.96906	0.297109	2.31011	2.93648	3.42719	0	0.210861	0.335755	0.098106	1.28719	2.18799	0.161181	-1.45705	21.3932	3.74091e-06	0.00023588
	ENSMUSG00000010601.14	Apol7a	3.56542	4.41789	7.27762	5.48281	20.3031	4.47931	1.96544	1.95364	0.948858	5.59934	8.20937	2.33681	-1.46463	16.0084	6.30624e-05	0.00255443
	ENSMUSG00000021118.7	Plek2	3.55505	1.26941	1.79519	5.91466	6.53521	0	0.768143	1.43938	0.738602	2.44618	3.8139	0.736531	-1.471	10.3823	0.00127231	0.0307105
	ENSMUSG00000026874.10	Hc	2.81692	1.61866	2.25611	6.91403	4.82691	0.079957	0.447931	0.25686	1.91572	2.34812	3.68653	0.675117	-1.48426	16.0778	6.07914e-05	0.00247418
	ENSMUSG00000043859.5	1700049L16Rik	0	0.604228	0.319528	8.8525	0	0	0.21544	0	0	1.11019	1.95525	0.05386	-1.4876	16.2242	5.62701e-05	0.00230482
	ENSMUSG00000028865.14	Cd164l2	0.478303	0.461241	1.89997	2.57996	8.26895	0	0.086681	1.24262	0	1.66864	2.73768	0.332325	-1.4882	10.7468	0.00104459	0.0264245
	ENSMUSG00000024987.5	Cyp26a1	0.540798	0.058487	0.377383	0	9.89352	0.270893	0.210191	0	0	1.26125	2.17404	0.120271	-1.50247	22.7686	1.82728e-06	0.00013442
	ENSMUSG00000026327.8	Serpinb11	0	0.388513	1.24183	6.10905	1.55165	0	0.034928	0	0	1.03622	1.85821	0.008732	-1.50257	29.964	4.40143e-08	5.79795e-06
	ENSMUSG00000056018.14	Ccdc7b	8.3475	1.52948	1.6295	0	0	0	0.45038	0.062555	0.145912	1.3517	2.3013	0.164712	-1.50306	14.0516	0.000177861	0.0061282
	ENSMUSG00000023013.5	Aqp2	0	0.45701	0.245436	2.15545	6.79784	0	0.054717	0.065576	0	1.08623	1.93115	0.0300732	-1.50872	30.5308	3.286e-08	4.54711e-06
	ENSMUSG00000026479.13	Lamc2	15.9666	10.6991	18.0431	63.1534	48.1706	7.99964	15.5958	11.0094	6.60655	21.916	31.2066	10.3028	-1.51067	10.3697	0.00128101	0.0308503
	ENSMUSG00000095200.2	Ighv1-7	0	0	9.36304	0	0	0	0	0	0	1.04034	1.87261	0	-1.52236	11.7471	0.000609389	0.0169826
	ENSMUSG00000090474.3	Gm9372	9.41477	0	0	0	0	0	0	0	0	1.04609	1.88295	0	-1.52755	17.6061	2.71719e-05	0.0012556
	ENSMUSG00000068200.6	Gm5931	9.43495	0	0	0	0	0	0	0	0	1.04833	1.88699	0	-1.52957	20.5918	5.68402e-06	0.000332977
	ENSMUSG00000108106.2	Gm5886	1.96448	0	1.71723	0	5.76596	0	0	0	0	1.04974	1.88953	0	-1.53084	23.1543	1.49506e-06	0.000113235
	ENSMUSG00000052117.5	D630039A03Rik	0.637326	0.725421	2.23259	6.3538	2.614	0.40135	0.124235	0.1792	0.139296	1.48969	2.51263	0.21102	-1.53633	21.847	2.95283e-06	0.000196004
	ENSMUSG00000115295.1	AC166822.3	2.18436	4.04185	2.21904	7.17964	5.02858	1.03086	0.949545	0.906133	0.149128	2.63213	4.13069	0.758916	-1.54447	9.24136	0.00236609	0.0491256
	ENSMUSG00000114850.1	Gm8438	9.58983	0	0	0	0	0	0	0	0	1.06554	1.91797	0	-1.54496	28.199	1.09463e-07	1.25101e-05
	ENSMUSG00000029695.13	Aass	1.59851	0.941029	2.85341	3.92831	8.58587	0.122465	1.31226	0.447058	0.390705	2.24218	3.58143	0.568122	-1.54676	12.5704	0.000391911	0.0118313
	ENSMUSG00000006154.13	Eps8l1	8.08195	9.6069	9.99563	47.7102	38.5136	9.38784	10.4896	7.01871	1.59532	15.8222	22.7817	7.12287	-1.54979	19.7464	8.84288e-06	0.000489995
	ENSMUSG00000062209.15	Erbb4	0.841059	0.27472	1.66714	7.7204	10.3199	0.017648	2.3519	0.63267	0.046109	2.65239	4.16464	0.762082	-1.55139	10.0456	0.00152714	0.0352204
	ENSMUSG00000038775.14	Vill	3.19252	3.15494	41.1855	65.5545	80.0063	38.4554	9.16885	1.99091	0.392326	27.0112	38.6188	12.5019	-1.55302	17.7102	2.5724e-05	0.00119952
	ENSMUSG00000055679.5	Ctsr	0.236185	0.229485	1.80754	7.30558	1.38162	0	0.164854	0	0.153614	1.25321	2.19208	0.079617	-1.56398	26.9183	2.12236e-07	2.19969e-05
	ENSMUSG00000026961.6	Lrrc26	0.658958	0	0.711002	6.09956	4.6212	0	0.339903	0	0.189814	1.40227	2.41814	0.132429	-1.59379	21.6957	3.19514e-06	0.000208662
	ENSMUSG00000076680.1	Ighv6-6	0	0	10.0949	0	0	0	0	0	0	1.12166	2.01898	0	-1.59406	10.4599	0.00121996	0.0298291
	ENSMUSG00000061048.8	Cdh3	1.65568	2.69574	3.02249	9.78718	11.7102	1.05426	1.10174	0.89615	1.91547	3.75988	5.77426	1.24191	-1.59534	9.33826	0.00224418	0.0474188
	ENSMUSG00000031098.18	Syt8	1.26607	0.298871	1.14919	1.6608	38.6656	0	0.639628	7.7447	0.311084	5.74844	8.60811	2.17385	-1.59802	11.8089	0.000589497	0.0166202
	ENSMUSG00000037145.14	2210407C18Rik	1.07117	0.568005	0	6.60525	4.95417	0	0.305358	0.48562	0	1.5544	2.63972	0.197744	-1.60351	16.9861	3.76549e-05	0.00164219
	ENSMUSG00000024903.10	Lao1	0	1.45942	0.519411	9.37175	7.36007	1.66526	0.030528	0.366748	0.161468	2.32607	3.74213	0.556001	-1.60769	18.6978	1.53158e-05	0.000776403
	ENSMUSG00000113555.1	Gm10095	0	10.3447	0	0	0	0.00954	0	0	0	1.15047	2.06894	0.002385	-1.6143	17.9345	2.28643e-05	0.00108977
	ENSMUSG00000034227.7	Foxj1	0	0.638429	0.364002	1.86807	8.88371	0.305301	0.02701	0	0.037848	1.34715	2.35084	0.0925398	-1.61684	30.4687	3.39296e-08	4.62216e-06
	ENSMUSG00000047428.14	Dlk2	0.315107	1.55418	3.71261	4.25508	17.532	1.22321	1.11363	1.68521	0.42007	3.53457	5.4738	1.11053	-1.61701	12.0478	0.000518523	0.0149822
	ENSMUSG00000041886.7	Macc1	3.54726	1.73116	2.17113	6.81823	8.0262	1.02019	0.566475	0.871947	0.652719	2.82281	4.4588	0.777833	-1.61846	12.2718	0.000459847	0.0134692
	ENSMUSG00000107489.1	Gm18325	1.29943	0.303829	2.11017	9.18928	4.01219	0.520846	0	0.648742	0.45432	2.05987	3.38298	0.405977	-1.64034	14.5445	0.000136884	0.00490789
	ENSMUSG00000059751.7	Rps3a3	1.45531	0	0.549439	4.2995	8.9069	0.778806	0.249626	0.143222	0	1.82031	3.04223	0.292913	-1.64453	15.5584	7.99954e-05	0.00312754
	ENSMUSG00000039676.4	Capsl	6.0199	1.99766	4.20565	12.3026	6.86702	2.17507	0.520033	1.19829	1.34281	4.06989	6.27857	1.30905	-1.65635	12.1031	0.000503387	0.0146165
	ENSMUSG00000028370.7	Pappa	1.24142	1.1185	2.86566	7.87208	7.01721	0.59034	1.07972	0.399222	0.247518	2.49241	4.02297	0.5792	-1.66935	14.5782	0.000134458	0.0048549
	ENSMUSG00000025082.8	Vwa2	0.378406	0.492773	1.34067	5.11495	6.53291	0.273064	0.337682	0.101557	0.023681	1.62174	2.77194	0.183996	-1.67164	24.7768	6.43677e-07	5.54819e-05
	ENSMUSG00000010760.5	Phlda2	0	0.350367	0.747545	6.12675	4.6187	0	0	0.149262	0	1.33251	2.36867	0.0373155	-1.69933	25.0651	5.54269e-07	4.96128e-05
	ENSMUSG00000066584.10	Scgb2b27	2.43381	0	0	4.34638	4.46781	0	0	0	0	1.24978	2.2496	0	-1.70026	31.2309	2.29086e-08	3.29471e-06
	ENSMUSG00000028039.11	Efna3	0.55153	0.042171	4.07902	9.90902	15.1798	0	3.10886	1.43495	0	3.81171	5.95231	1.13595	-1.70261	11.5656	0.00067182	0.0183159
	ENSMUSG00000031150.13	Ccdc120	4.0188	6.31641	8.03974	23.2543	40.6899	10.6842	2.05122	1.81013	2.90376	11.0854	16.4638	4.36233	-1.70344	10.3301	0.00130882	0.0313724
	ENSMUSG00000006567.11	Atp7b	0.03281	1.99719	1.19046	7.31783	3.05771	0.182708	0.082077	0.142366	0.158381	1.5735	2.7192	0.141383	-1.70421	28.5987	8.90403e-08	1.04461e-05
	ENSMUSG00000074115.5	Saa1	0	0.081158	2.88364	4.66244	8.59849	0	1.05842	0.070126	0.081769	1.93734	3.24515	0.302579	-1.70444	15.5641	7.97534e-05	0.00312724
	ENSMUSG00000026494.12	Kif26b	2.87747	0.930014	1.60597	3.61585	18.1312	1.73304	0.513637	0.775465	0.848781	3.44794	5.4321	0.967731	-1.70876	9.62896	0.00191533	0.0423059
	ENSMUSG00000081399.2	Gm14921	1.67834	0.270239	0.867249	7.23948	2.71556	0	0	0.34681	0	1.45752	2.55417	0.0867025	-1.70956	25.0458	5.59834e-07	4.99364e-05
	ENSMUSG00000082861.3	Gm11362	1.0363	1.18643	3.48783	8.47842	8.62561	0	1.38122	0.633095	0.76634	2.84392	4.56292	0.695164	-1.71442	11.2111	0.000813105	0.0213055
	ENSMUSG00000074480.4	Mex3a	1.59604	2.2153	4.51833	8.92685	18.5958	2.39368	0.675744	1.0035	1.8804	4.64507	7.17046	1.48833	-1.71524	9.79159	0.00175312	0.0392649
	ENSMUSG00000034382.14	AI661453	1.77753	1.1172	4.15464	12.3422	15.2857	3.10278	1.15794	1.18944	0.19499	4.48027	6.93545	1.41129	-1.71851	17.6322	2.68007e-05	0.00124068
	ENSMUSG00000034607.6	Pof1b	2.65484	0.392268	1.21565	6.36855	1.72588	0	0.19404	0.021219	0	1.39694	2.47144	0.0538148	-1.71991	41.0968	1.44873e-10	3.70875e-08
	ENSMUSG00000032327.14	Stra6	2.36866	0.612664	10.9873	9.26731	16.8927	0.418276	1.91752	3.80141	0.790399	5.22847	8.02573	1.7319	-1.72414	11.0114	0.000905531	0.0234394
	ENSMUSG00000035638.14	Muc20	0.267677	0.329212	0.6313	6.7785	5.29758	0	0.062543	0.133586	0.219012	1.52438	2.66085	0.103785	-1.72972	31.3039	2.20639e-08	3.20929e-06
	ENSMUSG00000042808.8	Gpx2	1.48971	0.702316	1.1845	5.66665	12.29	0.268848	0.08909	0.525333	1.40399	2.62449	4.26664	0.571815	-1.74445	10.0228	0.00154612	0.035447
	ENSMUSG00000096020.2	Ighv1-75	0	0	8.88231	0	2.93545	0	0	0	0	1.31308	2.36355	0	-1.74999	12.872	0.00033353	0.0103495
	ENSMUSG00000034282.3	Evpl	1.22678	0.828542	2.21078	8.66085	5.88043	0.508099	0.544016	0.528928	0.073409	2.27354	3.76148	0.413613	-1.75202	18.7339	1.50289e-05	0.000767943
	ENSMUSG00000096215.8	Smim22	2.7479	6.79122	7.24914	23.4139	12.4099	0	3.34076	1.96066	4.29743	6.91232	10.5224	2.39971	-1.76096	10.1611	0.00143437	0.033657
	ENSMUSG00000001249.14	Hpn	5.13169	5.91435	7.62289	33.4573	33.5742	2.2251	5.70995	6.85895	2.58237	11.453	17.1401	4.34409	-1.76316	12.623	0.000381022	0.0115742
	ENSMUSG00000106784.1	Gm43309	0	0.423977	0	6.85007	4.82904	0	0	0	0	1.34479	2.42062	0	-1.77426	19.4911	1.01069e-05	0.000549334
	ENSMUSG00000020142.12	Slc1a4	4.87685	2.53498	2.57334	16.5739	19.4512	1.97584	2.42763	1.93098	1.58942	5.99268	9.20205	1.98097	-1.77501	9.55174	0.0019976	0.0435965
	ENSMUSG00000025330.6	Padi4	0.630485	0.172519	1.78291	24.8064	4.22386	3.73271	0.263376	0.33481	0.184186	4.01458	6.32323	1.12877	-1.78246	10.9723	0.00092485	0.0238671
	ENSMUSG00000025665.16	Rps6ka6	2.49483	0.862604	1.18249	3.06643	9.14206	0.239431	0	0.079448	0.715391	1.97585	3.34968	0.258568	-1.78913	18.5579	1.64817e-05	0.000827317
	ENSMUSG00000028040.7	Efna4	1.06908	0.924279	1.98691	7.24798	6.87938	0	0.806505	0.341386	0.199066	2.16162	3.62153	0.336739	-1.78965	18.2569	1.9303e-05	0.000943047
	ENSMUSG00000047517.11	Dmbt1	5.15755	0.847094	5.65974	3.47664	2.09618	0.346678	0	0.219117	0.570991	2.04155	3.44744	0.284197	-1.79211	17.0105	3.7174e-05	0.00162676
	ENSMUSG00000087230.10	Mroh3	2.84726	1.23696	2.62544	4.5438	5.27567	0	0	0.587094	0.385163	1.9446	3.30583	0.243064	-1.79239	31.7845	1.72258e-08	2.6406e-06
	ENSMUSG00000031298.15	Adgrg2	9.24986	0.625267	4.18695	7.0229	12.3326	1.39269	2.48067	0.497603	0.47466	4.25147	6.68352	1.21141	-1.7968	12.6912	0.000367373	0.0112632
	ENSMUSG00000039865.8	Slc44a3	8.3366	2.80298	5.98165	24.5373	27.8066	4.52422	4.59555	2.39975	1.62026	9.17832	13.893	3.28495	-1.79729	13.5939	0.000226926	0.00753477
	ENSMUSG00000111899.1	Gm18636	1.01323	1.09039	1.5191	6.14811	4.27593	0	0.078252	0.187124	0.109145	1.60236	2.80935	0.0936302	-1.80042	26.9278	2.11197e-07	2.19783e-05
	ENSMUSG00000020303.2	Stc2	23.6102	49.3091	72.9752	308.635	88.7503	44.1434	10.9255	26.8473	39.7002	73.8774	108.656	30.4041	-1.80396	9.66134	0.00188186	0.0417106
	ENSMUSG00000032033.11	Barx2	3.9532	2.17796	5.52338	12.0024	16.4485	0.060102	2.08766	4.16228	0	5.15728	8.02109	1.57751	-1.80732	10.017	0.001551	0.0354514
	ENSMUSG00000093402.1	Gm18588	11.4952	0	0	1.09027	0	0	0	0	0	1.39839	2.51709	0	-1.81438	25.2718	4.97926e-07	4.53627e-05
	ENSMUSG00000030111.9	A2m	3.25643	0	0.176578	0.091097	9.99292	0.095328	0.06977	0.017725	0.020665	1.5245	2.70341	0.050872	-1.81727	46.2202	1.05684e-11	4.22734e-09
	ENSMUSG00000059900.14	Tmem40	4.97841	1.43016	5.24961	21.2125	11.2615	1.8085	3.16468	1.72686	0.437113	5.69659	8.82644	1.78429	-1.81936	11.5886	0.000663559	0.0181253
	ENSMUSG00000030854.17	Ptpn5	7.20926	4.78602	12.3341	14.3004	4.55579	5.48263	0.317349	0.236644	0.870353	5.56584	8.63711	1.72674	-1.82142	9.38394	0.00218894	0.0466292
	ENSMUSG00000010529.6	Gm266	7.77252	2.85936	6.53151	17.0164	13.6055	4.25184	0.927192	1.90273	0.832273	6.18881	9.55706	1.97851	-1.82555	10.5422	0.0011668	0.0287488
	ENSMUSG00000032358.12	Fam83b	3.25144	0.277954	1.00616	5.98496	3.51081	0.107703	0.159066	0.02126	0	1.59104	2.80626	0.0720072	-1.82806	40.8275	1.66273e-10	4.09286e-08
	ENSMUSG00000051225.9	Fam83a	1.51688	1.40604	4.10388	11.5133	19.2759	2.12564	1.60875	0.553113	1.35586	4.82882	7.5632	1.41084	-1.82861	11.4334	0.000721354	0.0193972
	ENSMUSG00000058248.12	Kcnh1	1.49159	1.14599	2.91415	22.1189	9.73523	1.57857	1.98452	1.6399	0.322072	4.7701	7.48117	1.38127	-1.83254	11.7675	0.000602741	0.0169024
	ENSMUSG00000039717.16	Ralyl	0.0783	0.103982	0.073939	0.059719	26.3608	0.160064	2.73833	0.183151	0	3.30648	5.33535	0.770386	-1.83936	10.3619	0.00128641	0.0309512
	ENSMUSG00000019987.9	Arg1	7.47298	5.79997	16.4923	32.7015	21.6906	2.0932	1.72509	5.10407	6.92444	11.1116	16.8315	3.9617	-1.84552	14.3297	0.000153426	0.00541751
	ENSMUSG00000001583.13	Tnk1	4.75547	6.19529	7.87652	28.0507	22.0068	4.63811	3.11085	2.8021	1.84596	9.03131	13.777	3.09925	-1.84992	14.8377	0.000117172	0.00430358
	ENSMUSG00000042306.11	S100a14	1.95234	0.435087	1.45133	5.78211	6.79922	0.419927	0.095862	0.228815	0	1.90719	3.28402	0.186151	-1.85268	20.205	6.95713e-06	0.000396665
	ENSMUSG00000028864.7	Hgf	5.76647	3.9366	4.73628	8.2445	15.1837	0.506579	2.41789	0.921058	1.63997	4.81701	7.57351	1.37137	-1.85416	12.1023	0.000503584	0.0146165
	ENSMUSG00000031734.13	Irx3	1.81034	3.52822	4.76662	20.0961	24.4419	3.35703	1.28305	3.23129	1.3045	7.09101	10.9286	2.29397	-1.85653	9.6222	0.00192239	0.0423886
	ENSMUSG00000102697.1	Pcdhac2	0.54911	0.670599	1.92228	15.6432	3.6036	0.264272	1.10497	0.465723	0.210269	2.71489	4.47776	0.511309	-1.85779	18.0072	2.20071e-05	0.001057
	ENSMUSG00000106619.1	Gm9353	0	0.526622	3.3847	25.7412	3.67617	0	2.43009	2.02515	0	4.19821	6.66574	1.11381	-1.85858	10.3779	0.00127532	0.0307423
	ENSMUSG00000094248.1	Hist1h2ao	10.7281	0	0	0	11.8376	0	0	2.07529	0	2.73789	4.51314	0.518822	-1.85992	12.7034	0.000364997	0.0112038
	ENSMUSG00000028885.8	Smpdl3b	2.26571	1.52206	1.85606	5.98473	11.7737	0.29406	0.802452	0.481726	0.663878	2.84938	4.68045	0.560529	-1.86397	16.2317	5.60471e-05	0.00229937
	ENSMUSG00000038903.13	Ccdc68	4.77277	2.83063	3.19819	14.9339	16.8535	0.828466	3.10738	2.21921	0.22454	5.44095	8.5178	1.5949	-1.87495	10.9059	0.000958604	0.0246141
	ENSMUSG00000032291.8	Crabp1	0.501097	0.321919	0.687517	0.422883	12.5748	0	0.230611	0	0	1.63765	2.90164	0.0576528	-1.88322	24.956	5.8654e-07	5.17773e-05
	ENSMUSG00000021125.6	Arg2	3.90881	5.97141	12.9906	37.101	11.8863	5.58803	1.62902	2.01747	3.4156	9.3898	14.3716	3.16253	-1.88474	9.65722	0.00188608	0.041739
	ENSMUSG00000009376.15	Met	16.8616	9.15179	15.1285	48.6625	54.6076	3.2004	11.2508	9.89566	3.84243	19.1779	28.8824	7.04732	-1.89272	9.20559	0.00241277	0.0499328
	ENSMUSG00000037279.13	Ovol2	0.79935	0.414526	1.94573	4.70828	5.99118	0	0	0.059523	0	1.54651	2.77181	0.0148807	-1.89395	41.5644	1.14049e-10	3.00995e-08
	ENSMUSG00000063727.3	Tnfrsf11b	3.97527	1.00645	1.15888	3.793	14.2775	0.241929	0.923625	0.480091	0.629749	2.94294	4.84222	0.568848	-1.89681	17.0527	3.63571e-05	0.00159647
	ENSMUSG00000110977.1	Gm48598	6.2766	0	0	3.30091	4.06677	0	0	0	0	1.51603	2.72886	0	-1.89873	10.2975	0.00133208	0.0317517
	ENSMUSG00000032091.15	Tmprss4	1.03163	1.32917	2.226	9.74305	4.45981	0.17062	0.190622	0.340564	0.398191	2.20996	3.75793	0.274999	-1.89984	22.4987	2.10285e-06	0.000151216
	ENSMUSG00000081022.1	Gm15936	0.670558	0	2.20393	8.21791	2.61002	0	0	0	0	1.52249	2.74048	0	-1.90322	21.5333	3.47733e-06	0.000221994
	ENSMUSG00000001131.11	Timp1	1.7781	0.457301	1.62869	1.73713	30.8499	0.522588	2.15598	0.520739	1.63385	4.58714	7.29022	1.20829	-1.90848	10.1708	0.00142684	0.033542
	ENSMUSG00000034919.2	Ttc22	0	0.154714	2.52302	6.28644	6.81751	0	0.178416	0.240248	0	1.80004	3.15634	0.104666	-1.9117	38.8284	4.6275e-10	1.02124e-07
	ENSMUSG00000095583.1	Ighv14-2	0	3.34844	10.4656	0	0	0	0	0	0	1.53489	2.76281	0	-1.91181	12.8075	0.000345237	0.0106869
	ENSMUSG00000046826.7	Fam187b	0.961831	1.12251	1.41028	11.4226	7.76079	0.775675	0.374948	0.418068	0.290673	2.72637	4.5356	0.464841	-1.918	14.2626	0.000158994	0.00559101
	ENSMUSG00000031853.5	Map3k21	1.64668	1.11387	1.23668	6.5636	11.3984	0.095405	0.872374	0.553372	0.148879	2.62547	4.39185	0.417507	-1.92742	20.0228	7.65261e-06	0.000432351
	ENSMUSG00000028255.6	Clca1	1.78029	0.234017	2.69953	17.2774	1.25636	0	1.53942	0.396297	0	2.79815	4.64952	0.483929	-1.92871	29.0566	7.02959e-08	8.48856e-06
	ENSMUSG00000104422.1	Ighv1-14	0	1.15182	8.55802	4.3395	0	0	0	0	0	1.56104	2.80987	0	-1.92974	17.4029	3.02364e-05	0.00136758
	ENSMUSG00000043782.8	Bicdl2	1.65029	1.44637	2.30511	10.0691	10.4903	0.186216	0.731673	0.554713	1.0242	3.162	5.19223	0.624201	-1.93073	16.3927	5.14824e-05	0.00213606
	ENSMUSG00000031410.14	Nxf7	3.37318	0.731725	1.72275	8.09187	5.29673	0	0.198497	0.369813	0.479356	2.25155	3.84325	0.261916	-1.94036	31.5505	1.94319e-08	2.9091e-06
	ENSMUSG00000079697.1	Gm5751	0	3.30311	16.2535	6.92786	10.0329	0	0.322293	3.009	1.32039	4.57434	7.30347	1.16292	-1.94073	9.30907	0.00228022	0.0479651
	ENSMUSG00000116419.1	AC113593.4	0.310956	0.995116	0.635912	4.85893	7.54218	0	0	0	0	1.59368	2.86862	0	-1.95182	31.8024	1.70681e-08	2.63219e-06
	ENSMUSG00000020656.16	Grhl1	8.16726	9.9381	12.3611	40.9036	34.7908	6.06142	2.63147	3.98516	6.24821	13.8986	21.2322	4.73156	-1.95565	9.31045	0.00227851	0.0479651
	ENSMUSG00000040055.9	Gjb6	0.332744	1.27634	0.856354	7.72038	7.99785	0	0.328288	0.358037	0.053745	2.10264	3.63673	0.185018	-1.9682	25.7691	3.84797e-07	3.59518e-05
	ENSMUSG00000100131.1	Gm28439	9243.17	412.871	2521.76	3827.44	912.924	3450.27	0	0	0	2263.16	3383.63	862.567	-1.97062	10.7947	0.0010179	0.0258515
	ENSMUSG00000030017.2	Reg3g	1.46104	0.511487	1.01399	7.60667	9.84632	0.194351	0	0.290676	0.678662	2.40036	4.0879	0.290922	-1.97867	20.1889	7.01596e-06	0.00039913
	ENSMUSG00000021795.10	Sftpd	0	0	1.1687	1.4314	14.4928	0.100162	0.062369	0.224069	0.087117	1.95185	3.41858	0.118429	-1.98211	28.4496	9.61711e-08	1.109e-05
	ENSMUSG00000033634.7	Nat8f2	0.836402	0.979226	0.829982	6.83738	8.74787	0.103493	0.267036	0.238568	0.090322	2.10336	3.64617	0.174855	-1.98356	29.7881	4.81934e-08	6.26068e-06
	ENSMUSG00000033831.5	Fgb	1.63467	0.07512	1.13358	10.892	2.24336	0	0.144129	0.086683	0	1.80106	3.19575	0.057703	-1.98799	44.6046	2.41129e-11	8.45605e-09
	ENSMUSG00000030873.9	Scnn1b	1.2613	2.11496	4.55735	19.3881	12.03	0.397862	2.3593	1.80958	0.34527	4.91819	7.87034	1.228	-1.99324	12.5245	0.000401652	0.0120684
	ENSMUSG00000064356.3	mt-Atp8	15887.9	335.116	805.6	1875.76	308.528	551.361	1746.77	1307.8	216.557	2559.49	3842.58	955.622	-2.00643	11.8317	0.000582304	0.0164718
	ENSMUSG00000026870.19	Cutal	0.786155	0.832465	3.73716	13.4166	3.66377	0.223813	0.55589	0.634852	0.046683	2.65527	4.48723	0.36531	-2.00685	17.6731	2.62313e-05	0.00121652
	ENSMUSG00000030905.5	Crym	2.66052	5.0625	6.70725	64.0202	5.40443	4.47692	1.87469	2.68135	4.60071	10.8321	16.771	3.40842	-2.01119	9.46943	0.00208924	0.0451347
	ENSMUSG00000056078.5	Lipm	0.643005	0.436326	0.548265	3.0364	11.3143	0.08447	0.078456	0	0	1.79347	3.19566	0.0407315	-2.0113	44.8989	2.0747e-11	7.37671e-09
	ENSMUSG00000062157.6	Ifnlr1	3.98522	3.13541	5.25091	13.3364	17.6559	2.19361	0.614471	0.967486	1.76977	5.43435	8.67277	1.38633	-2.01913	13.7574	0.000208003	0.00701565
	ENSMUSG00000007034.15	Slc44a4	1.09387	0.714252	2.71865	7.89637	4.2942	0.103584	0.096298	0.038557	0.04496	1.88897	3.34347	0.0708498	-2.02009	41.8076	1.00713e-10	2.68567e-08
	ENSMUSG00000033998.9	Kcnk1	6.45936	2.77065	6.13667	33.6462	31.0047	4.17057	4.48671	2.74803	1.34956	10.308	16.0035	3.18872	-2.02125	9.79736	0.00174762	0.0391762
	ENSMUSG00000016262.14	Sertad4	22.3626	7.03517	11.87	38.4438	57.7728	5.0548	10.9597	5.48799	2.54005	17.9474	27.4969	6.01063	-2.02319	12.291	0.000455139	0.0133619
	ENSMUSG00000042367.12	Gjb3	0.800226	0.324338	0.764254	7.23728	6.86294	0	0	0	0.130409	1.79105	3.19781	0.0326022	-2.02335	45.5871	1.46e-11	5.41681e-09
	ENSMUSG00000074923.10	Pak6	1.64022	1.43439	2.14451	19.9121	6.24362	0.426872	0.813607	1.20655	0.675973	3.83309	6.27497	0.780751	-2.03046	21.8994	2.87318e-06	0.000192046
	ENSMUSG00000025885.18	Myo5b	6.68512	3.65649	5.29776	26.1726	23.2729	1.132	1.57435	2.83298	4.11707	8.30459	13.017	2.4141	-2.0376	15.1477	9.94218e-05	0.00374294
	ENSMUSG00000116325.1	AC113593.3	0.961289	0.614894	2.4003	5.2278	9.93572	0	0	0.696384	0	2.20404	3.828	0.174096	-2.03988	21.3061	3.91492e-06	0.000245041
	ENSMUSG00000031558.15	Slit2	30.6909	3.22325	9.20766	23.2094	148.943	6.46511	20.1507	11.3443	0.867693	28.2336	43.0548	9.70695	-2.04075	9.59492	0.00195117	0.0428387
	ENSMUSG00000030340.16	Scnn1a	1.47669	1.45066	4.06902	21.1766	10.7182	1.57399	1.2233	1.22063	0.478223	4.82081	7.77823	1.12404	-2.04712	14.0247	0.000180426	0.00619157
	ENSMUSG00000068617.5	Efcab1	2.41276	0.962559	0.698698	3.82973	13.4065	0.414769	0.30772	0.215956	0.107804	2.48406	4.26205	0.261562	-2.06041	18.2221	1.96582e-05	0.000956749
	ENSMUSG00000094088.2	Ighv1-64	0	1.58069	42.1883	0	0	4.74728	0	0	0.591179	5.45638	8.7538	1.33461	-2.06278	10.4019	0.00125886	0.0305756
	ENSMUSG00000021604.15	Irx4	1.12429	1.21095	1.43863	7.22924	5.07074	0	0	0	0	1.78598	3.21477	0	-2.07545	62.7525	2.34388e-15	4.28596e-12
	ENSMUSG00000099845.1	Gm29273	16.1184	0	0	0	0	0	0	0	0	1.79093	3.22368	0	-2.0785	9.86509	0.00168444	0.0379593
	ENSMUSG00000031551.12	Ido1	4.23024	1.73737	11.5916	14.9199	8.30645	0.366503	1.93296	1.66947	0.700539	5.05056	8.15711	1.16737	-2.07895	13.741	0.000209822	0.00704914
	ENSMUSG00000078117.2	Gm16485	4.01387	1.45825	5.44125	14.3055	4.7837	0.415091	1.18656	0.515949	0.499728	3.62443	6.00051	0.654332	-2.08121	19.2669	1.13659e-05	0.000606182
	ENSMUSG00000052151.12	Plpp2	7.47872	13.2478	17.2486	50.5761	62.0531	5.98888	7.2998	6.93342	5.16389	19.5545	30.1209	6.3465	-2.08275	10.3246	0.00131269	0.0314359
	ENSMUSG00000081217.1	Gm15268	5.35707	3.75609	9.12293	0	13.4465	0	0	2.91835	0	3.84455	6.33652	0.729588	-2.08467	9.48938	0.00206665	0.0448358
	ENSMUSG00000021359.16	Tfap2a	17.1876	5.73188	10.7415	56.9889	35.605	7.72568	3.964	6.54726	2.47002	16.3291	25.251	5.17674	-2.08745	9.24277	0.00236427	0.0491256
	ENSMUSG00000032532.7	Cck	0	1.96971	1.58058	17.7198	4.80989	0.456883	0.910736	0.471721	0	3.10215	5.216	0.459835	-2.09018	16.7161	4.34108e-05	0.00185839
	ENSMUSG00000003227.4	Edar	3.47708	0.894816	2.46779	9.62057	4.71529	0.091841	0.302961	0.318835	0.185867	2.45278	4.23511	0.224876	-2.09558	30.2767	3.74594e-08	4.99458e-06
	ENSMUSG00000029370.10	Rassf6	4.52042	6.52429	15.635	35.9545	12.4559	3.64263	2.19354	0.752274	4.38127	9.5622	15.018	2.74243	-2.09765	13.2316	0.000275264	0.00878647
	ENSMUSG00000068086.6	Cyp2d9	1.62026	0.236469	3.01649	7.11947	4.41245	0	0	0	0	1.82279	3.28103	0	-2.09796	37.6804	8.33368e-10	1.76316e-07
	ENSMUSG00000030669.13	Calca	0	14.599	0	4.52396	3.78571	0	0.970906	0.234808	0	2.67938	4.58173	0.301428	-2.10062	21.4577	3.61721e-06	0.00023035
	ENSMUSG00000066861.14	Oas1g	8.75481	3.62992	12.1453	27.9442	30.1267	3.37003	3.76009	2.90625	2.27226	10.5455	16.5202	3.07716	-2.10338	11.4315	0.000722093	0.0193972
	ENSMUSG00000041660.8	Bbox1	2.00189	0.657156	2.69645	7.19703	10.2304	0	0.908685	0.103501	0.149189	2.66048	4.55659	0.290344	-2.10644	24.1805	8.77142e-07	7.03914e-05
	ENSMUSG00000112706.1	Gm46193	0	0	3.11142	8.08349	5.35297	0	0	0	0	1.83865	3.30958	0	-2.10755	16.5929	4.63232e-05	0.00196012
	ENSMUSG00000026304.13	Rab17	3.22398	4.09114	5.07963	28.0029	24.354	4.31068	0.175573	1.41714	3.0179	8.18588	12.9503	2.23032	-2.11055	15.0339	0.0001056	0.00393502
	ENSMUSG00000115489.1	AC164099.1	0.784463	0.980388	1.01004	0	13.8417	0	0	0	0	1.84629	3.32332	0	-2.11214	13.0677	0.000300433	0.00946014
	ENSMUSG00000038094.15	Atp13a4	6.72219	0.927985	2.85216	5.51648	17.1307	1.71047	0.156131	0.593301	0.574075	4.02039	6.6299	0.758494	-2.11732	18.0254	2.17979e-05	0.0010509
	ENSMUSG00000022900.14	Ildr1	4.73507	4.51302	12.7393	19.7112	22.4997	3.00551	0.312392	2.10326	3.33731	8.10631	12.8397	2.18962	-2.11735	13.6243	0.000223275	0.00745222
	ENSMUSG00000046402.10	Rbp1	6.2687	9.07844	11.2777	35.3809	76.3941	7.04335	5.09921	4.28825	5.98872	17.8688	27.68	5.60488	-2.11844	9.90835	0.0016453	0.0372741
	ENSMUSG00000024087.3	Cyp1b1	15.3607	20.1596	41.5875	36.1052	84.9574	16.0272	5.3138	1.86779	10.1312	25.7234	39.6341	8.335	-2.12197	9.92401	0.00163136	0.0370383
	ENSMUSG00000055373.8	Fut9	3.51678	0.382097	1.55825	5.74724	7.3793	0.017504	0.124394	0.138984	0.045506	2.10112	3.71673	0.081597	-2.12463	36.1652	1.81278e-09	3.38738e-07
	ENSMUSG00000045027.6	Prss22	0.413437	0.385069	1.42196	9.08458	7.60615	0.095901	0.131326	0.147669	0	2.1429	3.78224	0.093724	-2.12844	33.5784	6.84471e-09	1.18958e-06
	ENSMUSG00000039095.8	En2	0.196752	0.108407	0.382402	0	20.7511	0.220652	0.038997	0.515904	0.054682	2.47432	4.28773	0.207559	-2.13056	29.0779	6.9527e-08	8.43551e-06
	ENSMUSG00000050854.9	Tmem125	0.212575	0.836852	2.7375	9.77293	8.33553	0	0.158699	0.476198	0.277657	2.53422	4.37908	0.228138	-2.13089	24.4002	7.82618e-07	6.50488e-05
	ENSMUSG00000013338.16	Fer1l4	1.25806	0.232422	1.46337	13.1985	4.13636	0	0.413256	0.184335	0	2.3207	4.05774	0.149398	-2.13762	43.8814	3.48881e-11	1.14504e-08
	ENSMUSG00000053461.9	Hhipl2	4.96268	2.78114	7.61478	36.533	55.5981	8.6586	2.55204	5.03364	0.087139	13.7579	21.4979	4.08285	-2.14608	38.4419	5.64075e-10	1.23348e-07
	ENSMUSG00000057346.12	Apol9a	8.01751	5.16686	3.92776	32.4838	23.389	2.94947	0.329045	2.3113	4.35804	9.21475	14.597	2.48696	-2.16122	17.4442	2.95872e-05	0.00134296
	ENSMUSG00000112362.1	Gm48507	3.7439	0	10.337	0	3.32649	0	0	0	0	1.93415	3.48148	0	-2.16397	9.62436	0.00192013	0.0423753
	ENSMUSG00000039431.16	Mtmr7	11.1964	10.5312	14.1964	70.662	37.2206	6.19848	5.91043	5.45622	4.97033	18.4825	28.7613	5.63387	-2.16552	9.88109	0.00166986	0.0377969
	ENSMUSG00000089876.3	Tmem102	1.14142	1.69387	1.19587	15.0663	10.4226	0.674749	0.68495	0.548164	0.213075	3.51567	5.90401	0.530235	-2.17368	20.9003	4.83816e-06	0.000292806
	ENSMUSG00000026638.15	Irf6	31.766	16.3301	37.7813	98.4806	139.317	7.00649	11.7843	11.2478	24.2085	41.9913	64.735	13.5618	-2.17448	10.507	0.00118926	0.0292179
	ENSMUSG00000043088.16	Il17re	6.58763	7.19982	12.265	40.3719	57.7124	5.03199	3.59272	4.56086	5.6861	15.8898	24.8273	4.71792	-2.17534	10.288	0.001339	0.0318277
	ENSMUSG00000020000.7	Moxd1	28.2437	2.68914	9.59833	21.2823	60.2233	1.24031	12.5535	3.93576	0.722964	15.6099	24.4074	4.61313	-2.17837	11.9599	0.00054359	0.0155893
	ENSMUSG00000046761.12	Fam83h	3.16328	3.89148	8.1778	24.968	31.8872	3.27045	2.44088	2.09006	1.76454	9.07263	14.4176	2.39148	-2.18459	12.7094	0.000363826	0.0111812
	ENSMUSG00000047441.4	Antxrl	0.150166	0.234306	0.50462	7.41051	10.8268	0	0	0.202488	0.039351	2.15203	3.82528	0.0604597	-2.18592	32.6968	1.07715e-08	1.75637e-06
	ENSMUSG00000039835.16	Nhsl1	25.8362	12.9138	26.2052	80.9295	86.1066	3.96772	17.2899	12.3874	4.02157	29.962	46.3983	9.41665	-2.18594	10.4986	0.00119465	0.0293221
	ENSMUSG00000094509.1	Ighv14-1	0	0	31.5483	0	0	0	0	0	2.37094	3.7688	6.30966	0.592735	-2.1983	10.8671	0.000978871	0.0250341
	ENSMUSG00000101624.1	Gm28882	8.32923	0	7.26582	0	2.36122	0	0	0	0	1.99514	3.59125	0	-2.19889	13.5442	0.00023301	0.00763539
	ENSMUSG00000057060.7	Slc35f3	3.12855	3.92506	6.44699	26.814	11.0261	0.916727	1.48195	1.40566	1.90085	6.33843	10.2681	1.4263	-2.21542	15.4895	8.29637e-05	0.00321312
	ENSMUSG00000022687.12	Boc	15.103	10.6742	13.133	77.7511	63.4375	5.87919	12.5521	7.18377	2.18488	23.0999	36.0198	6.94998	-2.21927	10.8563	0.000984608	0.0251306
	ENSMUSG00000038059.6	Smim3	4.70781	4.46991	4.8093	26.7921	33.7982	2.20342	2.32701	1.90685	3.20612	9.35786	14.9155	2.41085	-2.22223	13.0426	0.000304483	0.00956414
	ENSMUSG00000099762.3	Gm21149	0.971828	1.97281	1.07045	5.17562	9.70631	0	0	0	0.09276	2.10998	3.7794	0.02319	-2.22376	43.0212	5.41499e-11	1.57527e-08
	ENSMUSG00000020607.7	Fam84a	2.07753	0.897357	1.65072	10.4238	16.8897	0.504397	0.823773	0.439818	0.555695	3.80698	6.38782	0.580921	-2.22438	18.571	1.63691e-05	0.000824901
	ENSMUSG00000046352.7	Gjb2	6.07263	3.5958	3.649	19.1191	15.0136	0.239873	2.85338	1.49983	0.374752	5.82422	9.49003	1.24196	-2.22619	15.8893	6.71587e-05	0.002699
	ENSMUSG00000029188.14	Slc34a2	1.30766	0.862855	1.62116	16.5275	8.11753	1.29675	0.130709	0.235873	0.045834	3.34954	5.68734	0.427291	-2.22815	36.9895	1.18767e-09	2.35693e-07
	ENSMUSG00000040136.10	Abcc8	3.71093	2.55303	8.40865	66.2893	17.4151	1.05062	2.54325	9.75346	0.29643	12.4468	19.6754	3.41094	-2.22876	18.2597	1.92738e-05	0.000943047
	ENSMUSG00000083353.1	Gm12540	0.885581	3.35548	6.91682	6.38837	5.6261	0	0.791046	0	0	2.6626	4.63447	0.197762	-2.23394	10.6405	0.0011064	0.0274721
	ENSMUSG00000019737.14	Syne4	16.4342	24.2449	24.2188	139.315	119.35	31.37	3.78077	5.66932	10.557	41.66	64.7126	12.8443	-2.24688	13.682	0.000216522	0.00723623
	ENSMUSG00000076672.7	Ighv3-6	0	0	91.5289	0	0.913484	12.3753	0	0	0	11.6464	18.4885	3.09382	-2.2511	10.0211	0.0015476	0.035447
	ENSMUSG00000067889.4	Sptbn2	2.56439	3.6332	7.15446	25.6882	30.3664	3.0141	1.84507	2.38576	1.21612	8.65197	13.8813	2.11526	-2.25608	14.0111	0.00018173	0.00621965
	ENSMUSG00000111356.1	Rpl32l	2.89339	1.17409	3.05044	33.9094	11.4294	3.19001	0.415685	1.44907	0.562913	6.45271	10.4913	1.40442	-2.25679	12.9502	0.000319892	0.00996258
	ENSMUSG00000021567.15	Nkd2	14.8671	5.30282	8.69318	18.1955	66.4065	4.43311	4.24469	3.46119	3.61707	14.3579	22.693	3.93901	-2.26217	10.4708	0.00121278	0.0297101
	ENSMUSG00000076587.3	Igkv6-20	0	33.2487	303.876	4.59413	11.2846	22.1965	5.86648	1.12605	26.3598	45.3947	70.6007	13.8872	-2.2659	9.5714	0.00197632	0.0432427
	ENSMUSG00000096459.1	Ighv9-3	0	5.02266	29.6111	7.56627	1.27093	0.884282	0	0	3.16125	5.27961	8.69419	1.01138	-2.26893	11.3095	0.000771103	0.020435
	ENSMUSG00000076677.1	Ighv6-3	0	0.803172	22.8902	0	0	0	0	0	0.759353	2.71697	4.73867	0.189838	-2.26995	13.4789	0.000241262	0.00783796
	ENSMUSG00000030228.18	Pik3c2g	1.29108	0.554714	4.0616	10.829	12.7032	0	0.666645	0.631408	0.412262	3.4611	5.88792	0.427579	-2.2705	14.2396	0.000160952	0.00564433
	ENSMUSG00000028019.9	Pdgfc	11.9133	6.28545	11.1037	26.5144	45.7093	2.22721	6.80319	3.16799	1.44768	12.7969	20.3052	3.41152	-2.27186	12.1144	0.00050033	0.0145716
	ENSMUSG00000106376.1	Gm34139	15.4472	5.72835	2.97419	40.9576	2.88061	0	3.05989	2.34205	2.68044	8.45226	13.5976	2.0206	-2.27283	10.1558	0.00143847	0.0336994
	ENSMUSG00000057454.5	Lypd3	2.35585	0.381982	1.09503	10.4304	6.56733	0	0	0.274401	0	2.345	4.16612	0.0686003	-2.27336	41.4952	1.18161e-10	3.08666e-08
	ENSMUSG00000026090.16	2010300C02Rik	2.51247	1.91888	3.62322	17.7296	18.4203	2.14929	0.560231	0.493163	0.912384	5.36884	8.84089	1.02877	-2.27819	16.8742	3.99408e-05	0.00173009
	ENSMUSG00000028640.11	Tfap2c	18.0968	15.8461	18.7593	68.2154	65.6062	7.81728	9.9551	3.59614	6.03989	23.7702	37.3048	6.8521	-2.28637	42.2323	8.10501e-11	2.20732e-08
	ENSMUSG00000044222.3	Defb13	0	0	0.457491	18.5292	0.451443	0	0	0	0	2.15979	3.88763	0	-2.28913	26.4063	2.7663e-07	2.74485e-05
	ENSMUSG00000081343.1	Gm16071	1.27376	1.63684	5.94927	16.7596	17.7804	2.24023	0.117199	0.558998	0.979366	5.25507	8.67997	0.973948	-2.29392	17.0606	3.62053e-05	0.00159647
	ENSMUSG00000028364.15	Tnc	14.6269	6.5044	18.5253	8.33284	200.522	15.4597	7.9468	4.95713	8.98154	31.7618	49.7023	9.33629	-2.29433	13.5054	0.000237875	0.00775746
	ENSMUSG00000052316.9	Lrrc15	1.19001	0.933854	1.0451	1.05104	36.8543	0.677195	0.989066	0.991943	0.853996	4.95406	8.21486	0.87805	-2.29473	17.7062	2.57788e-05	0.00119988
	ENSMUSG00000017607.9	Tns4	3.73775	3.38165	8.1769	21.0114	23.492	1.31218	1.78086	1.05949	2.37326	7.3695	11.9599	1.63145	-2.30013	11.5893	0.00066331	0.0181253
	ENSMUSG00000037600.16	Kdf1	2.27001	4.01195	3.96153	10.7985	20.4811	0.888527	1.03781	0.820975	0.789148	5.00662	8.30462	0.884115	-2.30406	15.5781	7.91674e-05	0.00312278
	ENSMUSG00000000157.15	Itgb2l	0.45569	0.990557	0.329367	11.4141	12.1734	0.165924	0.353778	0.30853	0.077054	2.91871	5.07262	0.226322	-2.30798	24.6446	6.89363e-07	5.80516e-05
	ENSMUSG00000033295.14	Ptprf	35.4477	27.2421	57.9565	210.512	265.54	20.8013	41.1692	20.9904	9.80057	76.6066	119.34	23.1904	-2.31461	9.307	0.0022828	0.04798
	ENSMUSG00000104616.1	Gm6069	0	2.07088	1.30448	12.3397	18.8825	0	2.35461	0	0	4.1058	6.91951	0.588653	-2.31761	14.32	0.000154222	0.00543064
	ENSMUSG00000043635.12	Adamts3	9.32885	3.80065	3.89095	17.7813	24.6988	0.929821	1.41412	1.88353	2.08218	7.31224	11.9001	1.57741	-2.32339	17.7197	2.55967e-05	0.00119576
	ENSMUSG00000041482.16	Piezo2	16.4965	12.4332	32.6288	102.275	32.8557	5.48758	9.38176	5.58601	7.4232	24.952	39.3378	6.96964	-2.33955	11.1782	0.000827663	0.0216427
	ENSMUSG00000054146.8	Krt15	1.1064	1.37434	3.03811	9.08718	7.91622	0	0	0.343559	0	2.54065	4.50445	0.0858898	-2.34172	49.7185	1.77461e-12	1.08167e-09
	ENSMUSG00000076564.2	Igkv12-46	0.552017	19.112	214.774	0	2.78152	5.8382	0.481827	1.66549	25.9919	30.133	47.4439	8.49435	-2.35117	10.5078	0.00118869	0.0292179
	ENSMUSG00000076586.2	Igkv8-21	0	6.58457	134.162	0	2.01491	3.52805	0.464961	0	15.0685	17.9803	28.5523	4.76538	-2.35778	10.9109	0.000955988	0.0245716
	ENSMUSG00000094103.2	1700047I17Rik2	15.9393	0	2.70431	2.33203	2.9e-05	0	0.037324	0	0	2.33478	4.19513	0.009331	-2.36376	72.2059	1.93877e-17	7.09038e-14
	ENSMUSG00000095416.6	Ighv1-12	0	0	35.6547	18.1462	0	4.47436	0	0	0.652653	6.54755	10.7602	1.28175	-2.3657	12.9327	0.000322892	0.0100438
	ENSMUSG00000021950.15	Anxa8	5.96207	1.02201	3.68813	7.62652	30.07	0.749426	0.867224	2.5553	0.093143	5.8482	9.67375	1.06627	-2.36896	21.0111	4.56636e-06	0.000278995
	ENSMUSG00000022026.7	Olfm4	0.188006	0.987962	2.62218	19.9203	1.71276	0.243532	0.046047	0	0.422619	2.90482	5.08624	0.178049	-2.36915	30.4474	3.43051e-08	4.62216e-06
	ENSMUSG00000030004.6	Nat8	0	0.71355	3.71603	8.26888	8.2152	0	0	0	0	2.32374	4.18273	0	-2.37371	49.6233	1.86287e-12	1.08385e-09
	ENSMUSG00000060716.7	Plekhh1	4.52229	4.29618	9.5413	46.681	17.1014	2.56503	2.22158	1.86578	2.76079	10.1728	16.4284	2.3533	-2.37779	14.3939	0.000148281	0.00527222
	ENSMUSG00000031075.18	Ano1	129.39	78.5134	130.102	746.103	473.429	47.4715	102.127	64.7924	21.3911	199.258	311.507	58.9455	-2.38217	9.61454	0.00193043	0.0425292
	ENSMUSG00000006411.12	Nectin4	3.87714	5.53948	12.922	34.5812	33.8289	5.71323	0.973787	1.64545	2.31848	11.2666	18.1497	2.66274	-2.38633	14.8378	0.000117164	0.00430358
	ENSMUSG00000096818.2	Gm29231	57.8672	5.80055	3.45841	0	33.2313	0	0	4.28171	7.73842	12.4864	20.0715	3.00503	-2.39541	12.6225	0.000381135	0.0115742
	ENSMUSG00000029375.6	Cxcl15	6.41489	4.6687	13.6425	42.049	10.7213	3.22837	1.70982	1.7722	1.81954	9.55848	15.4993	2.13248	-2.39702	16.2464	5.56155e-05	0.00228533
	ENSMUSG00000019734.16	Tmc4	24.3074	32.9122	51.387	176.161	158.311	26.3922	7.94225	14.7688	14.7292	56.3235	88.6157	15.9581	-2.40178	14.0439	0.000178587	0.0061368
	ENSMUSG00000050520.4	Cldn8	4.3944	1.05778	1.36657	11.344	10.7265	0.294634	0.578109	0.146214	0.085246	3.33261	5.77785	0.276051	-2.40914	31.0469	2.51872e-08	3.59289e-06
	ENSMUSG00000046623.8	Gjb4	0.172476	0	0.640353	3.8218	18.3674	0	0.214074	0	0	2.57957	4.60041	0.0535185	-2.41032	40.8524	1.64175e-10	4.08046e-08
	ENSMUSG00000081359.1	Cox20-ps	9.96407	3.293	3.39559	8.80004	0	0	0.580383	0	0	2.89256	5.09054	0.145096	-2.4111	16.5362	4.77299e-05	0.00200309
	ENSMUSG00000029868.13	Trpv6	2.73699	3.85956	5.18883	10.3411	44.3308	1.8523	0.894546	1.47478	2.52139	8.13337	13.2915	1.68575	-2.41175	14.6259	0.000131103	0.00476063
	ENSMUSG00000095771.2	Igkv14-111	22.4379	28.477	180.349	0	18.5514	13.9921	4.12062	3.55387	12.4748	31.5507	49.9631	8.53535	-2.41809	11.3597	0.000750559	0.0199779
	ENSMUSG00000080875.4	Gm7332	0	2e-06	11.4884	10.2484	0	0	0	0	0.000239	2.41523	4.34736	5.975e-05	-2.41874	27.1065	1.92547e-07	2.03861e-05
	ENSMUSG00000038600.12	Atp6v0a4	2.41948	0	0.72332	1.04446	20.456	0.34147	0.086492	0	0	2.78569	4.92865	0.106991	-2.42106	33.2336	8.17241e-09	1.37641e-06
	ENSMUSG00000068876.14	Cgn	6.32568	5.07762	9.45661	36.1787	21.2315	1.91881	3.24899	2.08169	1.12442	9.62711	15.654	2.09348	-2.42857	21.7183	3.1576e-06	0.000207268
	ENSMUSG00000034226.7	Rhov	1.0867	1.22602	4.28417	10.6977	10.6281	0	0.352454	0.158569	0.369841	3.20039	5.58454	0.220216	-2.43195	31.6402	1.85546e-08	2.81063e-06
	ENSMUSG00000095335.2	Igkv3-5	0	1.31692	89.3655	0	0.671636	7.76172	0	0	2.51142	11.2919	18.2708	2.56828	-2.43311	12.4553	0.000416797	0.0124504
	ENSMUSG00000027356.8	Fermt1	2.31541	1.39687	4.58295	11.7744	13.135	0.766424	0.351923	0.214257	0.308067	3.8717	6.64093	0.410168	-2.43788	27.4679	1.59726e-07	1.74742e-05
	ENSMUSG00000028115.16	Bnipl	3.42969	2.05566	5.76815	21.4692	27.4103	2.68528	0.615661	0.441369	1.83242	7.30086	12.0266	1.39368	-2.44416	21.1534	4.23946e-06	0.000261519
	ENSMUSG00000040714.14	Klc3	1.82968	3.79573	11.8809	17.2551	40.7366	1.35322	1.57126	1.705	3.19645	9.25822	15.0996	1.95648	-2.44507	17.7313	2.54412e-05	0.00119067
	ENSMUSG00000061397.8	Krt79	1.55956	0.080974	3.24728	8.37338	16.7617	0	1.08923	0.041649	0	3.46153	6.00458	0.28272	-2.44909	27.0402	1.99267e-07	2.09927e-05
	ENSMUSG00000028392.15	Bspry	3.85526	4.43003	10.0608	32.645	42.1672	5.37491	1.53276	1.84628	1.58236	11.4994	18.6317	2.58408	-2.45351	17.9491	2.26892e-05	0.00108483
	ENSMUSG00000023906.2	Cldn6	0.437584	0.638106	2.66636	11.23	7.46061	0	0	0	0	2.49252	4.48653	0	-2.45589	58.0938	2.49917e-14	3.0466e-11
	ENSMUSG00000051439.6	Cd14	9.19575	13.5406	29.1054	76.4511	134.936	13.3221	9.7298	5.74696	6.2961	33.1471	52.6458	8.77374	-2.45648	12.4493	0.000418147	0.0124616
	ENSMUSG00000039323.18	Igfbp2	4.5543	6.31681	8.13731	17.3383	98.2492	8.16236	0.241957	2.16059	5.74637	16.7675	26.9192	4.07782	-2.45898	13.8077	0.00020251	0.00685747
	ENSMUSG00000102942.1	Ighv1-33	0	0	32.872	0	1.70855	0	0	0	1.73711	4.0353	6.91611	0.434277	-2.46447	13.7012	0.000214321	0.00717204
	ENSMUSG00000074625.10	Arhgap40	0.605793	0.932009	4.518	21.2892	9.72495	0.697082	0.852859	0.129764	0.409201	4.35098	7.41399	0.522227	-2.46661	27.1049	1.92713e-07	2.03861e-05
	ENSMUSG00000030800.10	Prss8	2.91725	2.6135	5.02413	17.5764	18.7574	0.353322	0.833648	1.21073	1.11018	5.59962	9.37774	0.87697	-2.46701	21.5656	3.41937e-06	0.000219334
	ENSMUSG00000020218.11	Wif1	4.5544	4.97819	6.25114	13.2726	12.3185	1.15921	0.265146	0.555361	0.647698	4.88914	8.27497	0.656854	-2.4849	26.8602	2.18714e-07	2.2577e-05
	ENSMUSG00000076508.3	Igkv17-127	0	12.9217	147.505	0	6.35785	0	5.79228	0.634332	14.0939	20.8117	33.3569	5.13013	-2.48661	11.879	0.000567689	0.0161916
	ENSMUSG00000022382.15	Wnt7b	1.20915	0.970462	3.32826	18.8645	14.6882	0.227804	0.400178	0.903451	0.754466	4.59405	7.81211	0.571475	-2.48737	28.7514	8.22909e-08	9.75299e-06
	ENSMUSG00000081667.1	Gm12883	0	0	0	9.3271	13.7648	0	0	0	0	2.56577	4.61838	0	-2.49015	20.246	6.80967e-06	0.000389124
	ENSMUSG00000091305.1	Gm17100	12.0374	5.3536	9.37442	0	5.41644	0	1.28677	0	0	3.71874	6.43637	0.321692	-2.49221	10.0636	0.00151226	0.034972
	ENSMUSG00000000308.14	Ckmt1	8.44015	2.55702	1.61947	14.7282	14.9972	0.405934	0.846867	0.948106	0.492891	5.00398	8.46841	0.67345	-2.5003	26.0704	3.29188e-07	3.14448e-05
	ENSMUSG00000011034.6	Slc5a1	2.96621	1.2028	0.847806	9.71393	10.363	0	0.083217	0.060067	0.093375	2.81449	5.01875	0.0591648	-2.50654	53.2042	3.0061e-13	2.26342e-10
	ENSMUSG00000019368.13	Sec14l4	2.4907	3.05795	7.28061	32.4492	9.16507	0	1.76826	1.55822	1.02442	6.53271	10.8887	1.08773	-2.50959	24.1402	8.95726e-07	7.1213e-05
	ENSMUSG00000034112.9	Atp2c2	0.138269	0.359888	2.96811	21.569	7.48215	0.418408	0.194174	0.402479	0.241976	3.75272	6.50348	0.314259	-2.51331	33.5692	6.87727e-09	1.18958e-06
	ENSMUSG00000005202.2	Shbg	1.2751	0.810325	3.88329	10.3336	12.7445	0	0.578444	0.131152	0	3.30627	5.80936	0.177399	-2.53192	32.6546	1.10079e-08	1.78355e-06
	ENSMUSG00000047861.2	Foxi1	1.3665	0.676661	1.95783	12.6152	11.9827	0	0.425773	0.219218	0	3.24932	5.71978	0.161248	-2.53274	37.3656	9.7936e-10	2.04871e-07
	ENSMUSG00000015222.17	Map2	38.8638	5.77442	18.2817	61.1441	89.9154	4.9312	12.4084	6.18399	2.73794	26.6934	42.7959	6.56538	-2.53331	13.8254	0.00020061	0.00681117
	ENSMUSG00000031610.3	Scrg1	0.924455	0	0.210121	1.03221	21.8065	0	0	0	0	2.6637	4.79466	0	-2.53472	39.4241	3.41068e-10	7.93759e-08
	ENSMUSG00000037129.7	Tmprss13	5.38806	2.43707	5.13558	19.0657	19.8154	1.28534	0.780163	1.26482	0.474984	6.18301	10.3684	0.951327	-2.5425	22.0103	2.71197e-06	0.000185137
	ENSMUSG00000033860.13	Fgg	1.61536	0.554759	2.18702	14.7968	7.60519	0	0.0886	0.265733	0	3.01261	5.35183	0.0885833	-2.54472	42.9758	5.54203e-11	1.59411e-08
	ENSMUSG00000002289.15	Angptl4	40.7492	50.8853	158.978	252.995	284.653	25.6142	59.0338	11.7748	8.15994	99.2048	157.652	26.1457	-2.54707	10.7141	0.00106323	0.026811
	ENSMUSG00000082687.1	Gm11474	17.9326	3.39542	3.55877	0	8.5761	0	1.22067	0	0	3.85373	6.69258	0.305167	-2.55923	11.5395	0.00068134	0.0185162
	ENSMUSG00000022949.9	Clic6	4.00098	1.49924	6.05302	25.2929	15.2311	0.827738	1.62717	1.07755	0.205114	6.20165	10.4154	0.934393	-2.56103	22.034	2.67863e-06	0.000184336
	ENSMUSG00000004885.5	Crabp2	3.85015	2.56721	3.63269	20.1363	21.2784	0.448993	1.84079	0.447063	0.913002	6.12384	10.2929	0.912462	-2.56192	19.8446	8.39978e-06	0.000468485
	ENSMUSG00000076580.3	Igkv8-27	0	7.01114	81.8485	0	0.788554	1.40396	0	2.30741	5.04333	10.9337	17.9296	2.18867	-2.56962	17.2172	3.33402e-05	0.00148695
	ENSMUSG00000054196.7	Cthrc1	2.30792	1.45741	3.90912	21.7679	25.5447	0	1.78711	2.08676	0.194731	6.56174	10.9974	1.01715	-2.57233	19.2943	1.12037e-05	0.000600599
	ENSMUSG00000006777.7	Krt23	1.09686	0.541795	4.22151	8.93236	12.3121	0	0.194655	0.116713	0	3.04622	5.42093	0.077842	-2.57464	42.564	6.84081e-11	1.92445e-08
	ENSMUSG00000026259.14	Ngef	0.702884	2.77475	4.19981	13.0902	26.4774	0.362384	0.821279	1.24767	0.545968	5.58026	9.44901	0.744325	-2.58263	20.6735	5.44643e-06	0.000321264
	ENSMUSG00000028871.7	Rspo1	2.88246	6.05136	4.74546	16.8511	32.7169	0.501612	1.53578	0.736889	2.33577	7.59526	12.6495	1.27751	-2.58331	13.3018	0.000265148	0.00852555
	ENSMUSG00000005672.12	Kit	140.926	51.1911	135.283	181.73	294.329	28.5291	33.5867	19.7874	21.8539	100.802	160.692	25.9393	-2.58546	15.1692	9.82924e-05	0.00371134
	ENSMUSG00000070780.11	Rbm47	30.463	31.1892	65.9155	138.499	153.765	17.6421	13.192	7.35147	14.1616	52.4643	83.9663	13.0868	-2.59255	9.20301	0.00241617	0.0499628
	ENSMUSG00000032496.7	Ltf	142.275	17.1161	220.135	378.641	372.946	40.0078	26.4029	78.6928	1.33719	141.95	226.223	36.6102	-2.59491	13.3414	0.000259611	0.00837034
	ENSMUSG00000026818.5	Cel	0.489087	6.29217	3.10901	37.8205	26.8711	1.42444	0.441397	2.081	2.43172	8.9956	14.9164	1.59464	-2.61691	17.4327	2.97661e-05	0.00134869
	ENSMUSG00000094006.2	Igkv4-59	0	5.11125	255.14	0	2.96823	15.5468	0	0	15.247	32.6681	52.6439	7.69845	-2.62458	13.1815	0.000282731	0.0089912
	ENSMUSG00000112162.1	Gm48758	49.2043	2.51612	28.5882	240.071	45.5234	0	17.8342	22.4564	3.5297	45.5248	73.1806	10.9551	-2.63342	13.9223	0.000190528	0.00650336
	ENSMUSG00000050578.10	Mmp13	0.367649	0.147121	0.079226	0	27.4357	0	0.21163	0	0	3.13793	5.60594	0.0529075	-2.64938	49.9187	1.60248e-12	1.00058e-09
	ENSMUSG00000024479.3	Mal2	7.15493	1.48544	3.16493	12.5854	17.5225	0.268526	1.35344	0.285448	0.066565	4.87635	8.38264	0.493495	-2.6513	28.2967	1.04075e-07	1.19477e-05
	ENSMUSG00000078954.9	Arhgap8	7.08645	12.2276	15.2685	59.653	58.6	1.86869	4.08335	5.84238	4.27307	18.767	30.5671	4.01687	-2.65356	15.7494	7.23123e-05	0.002879
	ENSMUSG00000076522.2	Igkv16-104	0	7.45369	120.659	0	6.21467	6.52334	0	0	7.09814	16.4388	26.8655	3.40537	-2.66114	14.1694	0.000167063	0.00584264
	ENSMUSG00000041523.3	Upk2	1.24048	0	1.83188	19.0147	6.56743	0	0.153327	0.091678	0	3.21105	5.7309	0.0612513	-2.66503	42.7001	6.38105e-11	1.81505e-08
	ENSMUSG00000030607.7	Acan	0.038508	0	0.040908	0.607326	29.5606	0.176453	0.02732	0.098495	0.114846	3.40716	6.04947	0.104278	-2.67441	60.9275	5.92148e-15	9.47437e-12
	ENSMUSG00000031274.16	Col4a5	11.912	5.4706	9.27091	23.8011	115.816	2.46157	7.12357	6.50512	1.20875	20.3966	33.2541	4.32475	-2.68549	15.2432	9.45142e-05	0.00358454
	ENSMUSG00000038665.15	Dgki	4.92743	2.68805	5.57799	37.6176	16.1715	2.67082	0.772464	0.897055	0.602443	7.99171	13.3965	1.2357	-2.68692	24.1587	8.87155e-07	7.09724e-05
	ENSMUSG00000042784.9	Muc1	5.95713	4.66813	4.52651	27.7357	20.1035	0.864842	1.77182	0.30907	1.4779	7.49051	12.5982	1.10591	-2.6909	15.7383	7.27355e-05	0.00289135
	ENSMUSG00000019996.17	Map7	36.4894	14.4321	28.7965	102.057	87.2363	6.23328	10.388	8.47591	4.72435	33.2036	53.8023	7.45538	-2.69629	16.0842	6.05879e-05	0.00246983
	ENSMUSG00000090790.1	Gm17377	62.8579	21.6588	2.90025	14.5375	18.918	1.02003	8.45754	0	1.94775	14.6998	24.1745	2.85633	-2.70666	11.2167	0.000810666	0.0212634
	ENSMUSG00000079620.13	Muc4	0.680452	1.14531	1.58173	16.0189	9.37547	0.047993	0	0.069774	0.020808	3.2156	5.76037	0.0346438	-2.70797	62.4913	2.67628e-15	4.56753e-12
	ENSMUSG00000075225.14	Ccdc162	29.9375	2.39978	9.72638	38.6373	13.0615	0.257861	2.19039	4.35665	1.23924	11.3118	18.7525	2.01104	-2.7137	13.6098	0.000225003	0.00748431
	ENSMUSG00000063130.4	Calml3	4.34315	1.74171	1.71514	13.2471	12.8455	0	0.600864	0.065465	0.076352	3.84836	6.77852	0.18567	-2.71379	36.4561	1.56146e-09	2.96099e-07
	ENSMUSG00000046782.14	Ttc6	2.64034	1.23936	3.56367	19.2956	6.24822	0	0.139192	0.451522	0.016276	3.73269	6.59744	0.151748	-2.72169	44.288	2.83445e-11	9.80565e-09
	ENSMUSG00000035498.10	Cdcp1	10.7668	9.15784	19.3372	73.579	45.0057	6.40365	2.59972	2.56966	4.1583	19.2864	31.5693	3.93283	-2.72302	21.5753	3.4021e-06	0.000218829
	ENSMUSG00000102313.1	Ighv1-62-1	0	0	23.0606	2.09741	2.88176	0	0	0	0	3.11553	5.60795	0	-2.7242	20.5984	5.66435e-06	0.000332585
	ENSMUSG00000022780.5	Meltf	1.41031	0.734657	1.50973	8.10957	21.6492	0.160307	0.099116	0.238478	0.115849	3.7808	6.68269	0.153438	-2.73567	43.4951	4.25019e-11	1.30139e-08
	ENSMUSG00000032332.17	Col12a1	23.1784	3.02892	6.69917	15.1688	227.496	3.86219	17.3081	6.52917	1.79769	33.8965	55.1143	7.37429	-2.74433	14.0997	0.000173368	0.00600573
	ENSMUSG00000095690.1	Rab11b-ps2	16.545	0	0	1.03727	10.9897	0	4.2e-05	0	0	3.17467	5.71439	1.05e-05	-2.74724	45.2182	1.76259e-11	6.44606e-09
	ENSMUSG00000089811.2	Gm16138	2.9054	1.245	1.49618	12.0008	14.4639	0	0	0.265731	0.155084	3.61468	6.42226	0.105204	-2.74755	37.1305	1.10482e-09	2.20963e-07
	ENSMUSG00000114705.1	Gm18760	10.8727	3.42084	3.41225	17.6798	21.8068	0.242246	1.83478	1.08861	0.211893	6.72999	11.4385	0.844382	-2.7536	22.0663	2.63387e-06	0.000181744
	ENSMUSG00000028699.9	Tspan1	6.86055	2.61304	5.98877	42.0237	12.1782	0	2.17598	2.06743	0.569328	8.27522	13.9329	1.20318	-2.76083	19.2887	1.1237e-05	0.000600599
	ENSMUSG00000048915.12	Efna5	21.3502	2.12137	11.1915	26.2953	64.091	1.02146	6.26767	2.69311	1.29107	15.147	25.0099	2.81833	-2.76805	14.343	0.000152349	0.00539438
	ENSMUSG00000060512.7	0610040J01Rik	5.57559	7.95142	8.54379	34.7442	42.164	3.08822	2.23546	1.49155	1.37918	11.9082	19.7958	2.0486	-2.77007	17.4489	2.95128e-05	0.00134197
	ENSMUSG00000037035.5	Inhbb	7.98148	4.74118	19.9177	79.6233	54.9949	3.36791	5.83006	4.64394	2.35892	20.3844	33.4517	4.05021	-2.77016	17.4563	2.93984e-05	0.00133915
	ENSMUSG00000025650.12	Col7a1	17.4959	9.29252	19.0351	82.2736	147.069	4.88601	4.13105	18.3162	1.43831	33.7709	55.0332	7.19289	-2.77384	22.6032	1.99154e-06	0.000144021
	ENSMUSG00000019851.8	Perp	24.3058	5.75774	17.2883	40.4278	45.7958	0.485295	7.33769	3.56872	0.790167	16.1953	26.7151	3.04547	-2.77629	18.3729	1.81625e-05	0.000899974
	ENSMUSG00000034435.6	Tmem30b	5.3982	1.2031	3.39798	20.201	9.80911	0.226741	0.44441	0.365554	0.196718	4.58253	8.00188	0.308356	-2.78247	36.1019	1.87266e-09	3.47391e-07
	ENSMUSG00000112292.1	Gm8275	0	0	2.63677	15.3314	11.4417	0	0	0	0	3.26776	5.88197	0	-2.78282	29.2755	6.27836e-08	7.69062e-06
	ENSMUSG00000076538.1	Igkv13-84	0	18.1564	223.112	0.710786	0	13.7694	2.13718	0	8.74989	29.6262	48.3958	6.16412	-2.78553	14.522	0.000138532	0.00496001
	ENSMUSG00000027750.16	Postn	121.136	24.2051	58.6452	74.8029	576.258	10.6873	52.2091	22.5926	10.1803	105.635	171.009	23.9173	-2.78727	14.8334	0.000117437	0.00430713
	ENSMUSG00000073764.2	Gm12888	1.77433	1.24278	0.922906	12.8216	14.1527	0	0.137269	0	0	3.45018	6.18286	0.0343173	-2.79588	48.5084	3.28883e-12	1.61882e-09
	ENSMUSG00000079602.2	9230102O04Rik	3.0193	1.78841	5.96841	30.5212	25.3822	0	2.04163	0	2.18641	7.87862	13.3359	1.05701	-2.80101	21.0869	4.38918e-06	0.000269455
	ENSMUSG00000081803.1	Gm15282	2.0922	0	2.79324	17.6049	16.2671	0	0.958327	0	0	4.41286	7.75149	0.239582	-2.81967	14.557	0.00013598	0.00488915
	ENSMUSG00000028544.14	Slc5a9	16.5884	6.1994	8.32248	9.74119	47.6538	2.04778	0.607805	1.58736	2.29814	10.5607	17.7011	1.63527	-2.8271	17.947	2.27137e-05	0.00108483
	ENSMUSG00000037973.6	Ccdc129	4.73989	3.2465	8.49309	34.0492	17.4805	0.716914	1.81832	1.45888	0.159695	8.01811	13.6018	1.03845	-2.8406	24.8214	6.28968e-07	5.45816e-05
	ENSMUSG00000022510.14	Trp63	6.02545	3.05885	9.71472	21.2618	37.3101	0.444018	0.771194	3.78801	0.177754	9.17243	15.4742	1.29524	-2.84349	29.7789	4.84224e-08	6.26068e-06
	ENSMUSG00000083808.1	Gm3828	0	8.25583	6.56231	12.0869	4.20042	0	0	0	0	3.45616	6.22109	0	-2.85222	12.5488	0.000396459	0.0119264
	ENSMUSG00000040690.15	Col16a1	22.7676	34.6357	63.0821	160.697	515.44	22.1264	34.012	18.764	9.55531	97.8978	159.324	21.1144	-2.85793	10.9336	0.000944356	0.0243214
	ENSMUSG00000073291.3	Gm10491	10.9844	20.4849	0	0	0	0	0	0	0	3.49659	6.29386	0	-2.86668	11.1902	0.000822319	0.0215249
	ENSMUSG00000022286.16	Grhl2	25.0542	10.6093	14.9281	81.1863	63.4735	3.1997	4.73422	5.66174	4.31646	23.6848	39.0503	4.47803	-2.87008	19.2289	1.15942e-05	0.000615794
	ENSMUSG00000071506.3	Tmem139	1.9956	0.595286	2.12794	14.4386	18.5205	0	0.569779	0	0.099404	4.26079	7.53559	0.167296	-2.87032	37.3557	9.84341e-10	2.04871e-07
	ENSMUSG00000025927.13	Tfap2b	3.37848	1.832	3.67903	20.743	20.0157	0.476157	0.606178	0.634782	0.249143	5.73494	9.92964	0.491565	-2.87335	22.8367	1.76365e-06	0.00013049
	ENSMUSG00000036687.13	Tmem184a	5.98823	2.11779	11.0858	37.7271	37.9206	1.04375	1.21865	3.99379	0.62579	11.3024	18.9679	1.7205	-2.87574	18.2518	1.9354e-05	0.000943739
	ENSMUSG00000024039.14	Cbs	13.8302	0.900619	5.0872	24.7099	10.475	0	0.920677	1.07824	0.539421	6.39347	11.0006	0.634584	-2.87611	20.3009	6.6171e-06	0.000381527
	ENSMUSG00000093894.1	Ighv1-53	0	0	47.9894	0	0	1.76856	0	0	0	5.52866	9.59788	0.44214	-2.87749	18.3779	1.81143e-05	0.000899974
	ENSMUSG00000030256.11	Bhlhe41	15.2397	9.14044	15.5752	87.8588	96.8274	2.53347	7.77881	8.26429	2.38955	27.2897	44.9283	5.24153	-2.87941	15.3132	9.10757e-05	0.00348511
	ENSMUSG00000057092.12	Fxyd3	29.393	5.80545	13.3239	97.8674	97.7838	4.08386	9.6812	9.0034	0.306637	29.6943	48.8347	5.76877	-2.88018	15.1344	0.000100124	0.00376384
	ENSMUSG00000096461.5	Igkv14-130	0	0	62.8185	0	0	2.67415	0	0.682113	0	7.35275	12.5637	0.839066	-2.88271	17.5805	2.75402e-05	0.00126576
	ENSMUSG00000043003.14	Rasef	6.14433	2.13659	5.58947	14.6277	14.6012	0.084618	0.503656	0.519155	0.102816	4.92328	8.61986	0.302561	-2.88466	36.9303	1.2243e-09	2.39734e-07
	ENSMUSG00000026303.6	Mlph	17.4958	12.6932	35.7091	142.432	80.8	10.1255	5.87431	6.70574	4.9962	35.2035	57.826	6.92544	-2.89189	16.6839	4.41534e-05	0.00188388
	ENSMUSG00000030170.14	Wnt5b	6.20263	7.49045	12.2946	46.4655	83.4252	4.1874	2.66313	3.69183	2.69172	18.7903	31.1757	3.30852	-2.90071	19.2474	1.14828e-05	0.00061114
	ENSMUSG00000089661.9	Mia	4.16939	4.72966	8.56782	11.758	67.0365	4.01803	0	1.72276	1.08428	11.454	19.2523	1.70627	-2.90371	20.289	6.6582e-06	0.000383033
	ENSMUSG00000094806.2	Cyp2d10	1.00457	0.297746	1.0863	7.88637	29.2897	0	0.635814	0.127191	0	4.48085	7.91294	0.190751	-2.90403	43.3685	4.53434e-11	1.36564e-08
	ENSMUSG00000025064.14	Col17a1	9.92856	4.11189	7.23725	26.8309	53.1425	2.25681	1.76119	2.19154	1.13604	12.0663	20.2502	1.83639	-2.90535	21.8261	2.98515e-06	0.000197467
	ENSMUSG00000096672.1	Ighv1-63	0	0	32.502	0	0	0	0	0	0	3.61133	6.5004	0	-2.90697	22.6091	1.98541e-06	0.000143985
	ENSMUSG00000041842.15	Fhdc1	28.0809	17.032	20.758	78.2652	96.3853	7.63886	9.19694	3.82177	1.42455	29.1782	48.1043	5.52053	-2.91279	20.0383	7.59066e-06	0.000429913
	ENSMUSG00000040969.14	Arhgef38	5.34989	1.70994	3.39916	17.7471	11.1143	0.130548	0.401178	0.098238	0.068254	4.44651	7.86408	0.174555	-2.91586	43.538	4.15797e-11	1.30139e-08
	ENSMUSG00000070933.10	Speer4d	0.949997	2.59103	1.46772	16.8983	14.4085	0	0.209889	0.125135	0	4.07229	7.26311	0.083756	-2.93064	40.6063	1.86209e-10	4.51858e-08
	ENSMUSG00000021553.14	Slc28a3	7.40776	9.36125	10.6621	54.7579	53.4075	2.78162	3.15325	3.23738	1.55161	16.2578	27.1193	2.68097	-2.9334	24.2227	8.58145e-07	6.99292e-05
	ENSMUSG00000029074.14	Ttll10	7.58942	11.6664	10.4502	54.6415	39.5778	7.63617	0.334132	0.510066	1.02021	14.8251	24.7851	2.37514	-2.93351	11.7856	0.000596919	0.0167925
	ENSMUSG00000022865.13	Cxadr	33.3542	6.35006	21.7098	57.0811	72.9308	1.05113	7.91303	4.39457	3.20664	23.1101	38.2852	4.14134	-2.93377	21.5847	3.38534e-06	0.000218299
	ENSMUSG00000005251.14	Ripk4	3.29855	3.34069	10.9749	36.0807	41.5629	2.82041	1.10914	1.32145	1.21501	11.3026	19.0515	1.6165	-2.938	22.7708	1.82514e-06	0.00013442
	ENSMUSG00000028536.12	2610528J11Rik	3.02004	1.58155	2.15137	21.7576	11.6136	0	0	0.645447	0	4.52996	8.02483	0.161362	-2.95808	38.8478	4.58169e-10	1.01992e-07
	ENSMUSG00000025481.12	Urah	3.33853	1.45365	1.87898	22.7204	15.7693	0	0.840188	0.322122	0	5.14702	9.03217	0.290577	-2.95855	35.057	3.20194e-09	5.77251e-07
	ENSMUSG00000028132.15	Tmem56	31.9419	11.7722	53.5535	325.896	93.5028	5.79749	10.8772	31.7043	1.2463	62.9213	103.333	12.4063	-2.96021	17.5941	2.7343e-05	0.00126051
	ENSMUSG00000000381.10	Wap	1.54371	0.650466	1.55636	7.35812	24.8587	0	0.194629	0	0	4.018	7.19347	0.0486572	-2.96593	30.9196	2.68939e-08	3.80377e-06
	ENSMUSG00000056174.8	Col8a2	1.2073	2.05499	0.740952	1.63248	60.3722	0.915122	1.05483	1.03988	0.250392	7.69646	13.2016	0.815056	-2.96797	23.1651	1.48669e-06	0.000112936
	ENSMUSG00000054889.10	Dsp	7.10179	2.85663	10.8059	37.6229	22.7218	2.78706	1.03316	0.786495	0.179909	9.54396	16.2218	1.19666	-2.97086	40.597	1.87098e-10	4.51858e-08
	ENSMUSG00000078949.2	R3hdml	0.652897	0.52715	3.72948	22.3945	7.93573	0	0.07567	0	0	3.92394	7.04795	0.0189175	-2.98158	53.304	2.85718e-13	2.25635e-10
	ENSMUSG00000050359.7	Sprr1a	0.994898	0	3.58388	25.0545	9.27996	0	0	0.272752	0.159189	4.37169	7.78265	0.107985	-2.98672	40.3796	2.0911e-10	5.00301e-08
	ENSMUSG00000039364.13	Sectm1b	5.28585	0.47932	5.67838	13.7144	12.724	0	0.327238	0	0	4.24547	7.57639	0.0818095	-2.98692	38.9732	4.29667e-10	9.82096e-08
	ENSMUSG00000115388.2	Eppk1	5.46404	5.17633	13.9704	36.7274	41.3027	2.13736	2.28051	1.68901	0.740921	12.1654	20.5282	1.71195	-2.98882	23.3682	1.33769e-06	0.00010288
	ENSMUSG00000104841.1	Gm17743	7.66069	1.93762	2.62073	23.4729	21.0066	0.506333	0.494116	1.02385	0.188527	6.54571	11.3397	0.553207	-2.98999	31.6286	1.86657e-08	2.81083e-06
	ENSMUSG00000081911.1	Mrps36-ps2	0	9.49976	19.5042	0	15.8993	0	1.02366	0	0	5.10299	8.98065	0.255915	-2.9904	15.5063	8.22325e-05	0.00319932
	ENSMUSG00000110439.1	Gm21320	13.2644	0.145474	209.882	0	15.829	0	8.59506	11.5205	0.290221	28.8363	47.8242	5.10145	-3.00037	18.0512	2.15042e-05	0.00104263
	ENSMUSG00000029381.16	Shroom3	32.0078	28.6383	34.0989	190.085	172.09	9.74407	15.7558	8.55264	8.09503	55.4519	91.384	10.5369	-3.00139	9.87174	0.00167837	0.037956
	ENSMUSG00000000303.12	Cdh1	26.8845	12.8954	24.2086	119.82	104.09	4.00368	11.5659	7.13251	2.44915	34.7833	57.5797	6.28781	-3.00684	19.2067	1.17303e-05	0.00062173
	ENSMUSG00000024598.8	Fbn2	1.45206	0.831598	1.21849	5.23733	51.9731	0.458866	0.537987	0.820004	0.652484	7.02021	12.1425	0.617335	-3.02255	30.4511	3.42384e-08	4.62216e-06
	ENSMUSG00000078575.2	Gm12887	0.628222	4.66531	0.802437	1.28179	28.3879	0	0	0	0	3.97396	7.15313	0	-3.02735	24.7187	6.63361e-07	5.66068e-05
	ENSMUSG00000094198.2	Ighv1-50	0	1.70557	51.1395	0	0	0	0	0	1.6232	6.05203	10.569	0.4058	-3.0408	22.1544	2.51573e-06	0.000175007
	ENSMUSG00000001622.15	Csn3	58.3139	14.6217	25.1824	106.803	83.2436	4.05439	6.1833	8.15485	5.82032	34.7086	57.6329	6.05321	-3.05536	22.2921	2.34172e-06	0.000165146
	ENSMUSG00000040525.13	Cblc	4.10005	3.32181	11.5196	29.6651	28.0758	0.206693	1.06185	2.33809	0.178034	8.94078	15.3365	0.946167	-3.06939	31.7441	1.75882e-08	2.6801e-06
	ENSMUSG00000049112.9	Oxtr	11.1515	10.6429	23.3822	58.3379	56.1796	2.068	5.98647	2.67502	0.860876	19.0316	31.9388	2.89759	-3.07913	21.2116	4.11265e-06	0.000255543
	ENSMUSG00000024578.2	Il17b	0	3.21302	7.91252	37.8125	27.477	1.5956	1.58036	0.511933	0	8.90033	15.283	0.921973	-3.08271	25.4424	4.55797e-07	4.19727e-05
	ENSMUSG00000026147.16	Col9a1	3.57053	1.14343	3.27681	8.79687	29.461	0	0.091299	0.439064	0.273951	5.22811	9.24973	0.201078	-3.09318	45.6195	1.43602e-11	5.40618e-09
	ENSMUSG00000026417.13	Pigr	9.18887	1.05847	2.89963	23.3686	20.8768	0.527128	0.259593	0.154419	0.900841	6.58159	11.4785	0.460495	-3.09491	43.8875	3.47797e-11	1.14504e-08
	ENSMUSG00000076614.7	Ighg1	1.50129	37.1205	2001.31	4.17641	12.2275	109.408	0.309238	2.50237	75.6409	249.355	411.267	46.9651	-3.10352	17.8257	2.4209e-05	0.00114135
	ENSMUSG00000003309.14	Ap1m2	6.90054	5.07166	12.1056	46.2241	62.2328	2.49013	1.91633	0.756333	3.57997	15.6975	26.5069	2.18569	-3.11012	25.2958	4.91791e-07	4.49637e-05
	ENSMUSG00000026380.10	Tfcp2l1	13.0875	4.12542	15.3489	33.6513	28.2393	1.21647	1.60884	1.67761	0.692003	11.0719	18.8905	1.29873	-3.11317	20.5389	5.84309e-06	0.000340736
	ENSMUSG00000063975.13	Slco1a5	7.22471	0.839278	3.51993	8.63431	23.7593	0	0.162979	0.363988	0	4.94494	8.79551	0.131742	-3.11358	49.4113	2.07552e-12	1.15507e-09
	ENSMUSG00000082974.1	Gm15129	0	14.9797	1.74136	8.21497	13.4441	0	0	0	0	4.26446	7.67603	0	-3.11703	16.6191	4.56884e-05	0.00193967
	ENSMUSG00000031722.10	Hp	30.1662	13.2252	39.4883	170.052	447.331	6.81077	42.1494	10.7745	1.2327	84.5811	140.053	15.2418	-3.11845	17.4852	2.89558e-05	0.0013237
	ENSMUSG00000055333.14	Fat2	2.10316	1.2081	2.0373	10.3436	23.6433	0	0.031709	0.043648	0.00636	4.37969	7.86709	0.0204292	-3.11928	82.6265	9.91191e-20	6.34362e-16
	ENSMUSG00000020062.7	Slc5a8	16.4297	0.689324	4.04047	8.35965	15.6355	0.286322	0.101316	0.122119	0.106887	5.0857	9.03093	0.154161	-3.11954	53.269	2.90858e-13	2.25635e-10
	ENSMUSG00000076562.1	Igkv4-50	0	0.830129	113.839	0	0.840406	0	0	0	7.0559	13.6184	23.1019	1.76398	-3.12433	18.7891	1.46002e-05	0.000752043
	ENSMUSG00000102888.1	Ighv1-11	0	4.18555	2.58919	52.9639	21.1821	2.65285	1.18034	0	0	9.4171	16.1841	0.958298	-3.13341	20.8914	4.86066e-06	0.000293474
	ENSMUSG00000040046.14	Tph1	26.1251	11.8713	144.762	114.018	27.8948	5.35998	10.6631	6.27493	3.6233	38.9547	64.9342	6.48033	-3.13985	23.7908	1.07393e-06	8.48541e-05
	ENSMUSG00000038679.16	Trps1	91.2401	53.9767	74.0097	349.842	451.831	24.7247	20.6461	21.4438	22.1132	123.314	204.18	22.232	-3.14271	19.7142	8.99284e-06	0.000496942
	ENSMUSG00000076612.8	Ighg2c	0.079988	7.23472	216.179	0.455571	4.38345	6.18383	0.593473	0.177469	10.144	27.2702	45.6665	4.27469	-3.14523	20.9988	4.59567e-06	0.000280117
	ENSMUSG00000031273.16	Col4a6	7.36022	6.8391	8.39957	28.7046	85.2523	0.993587	2.95298	3.1931	1.6466	16.1491	27.3112	2.19657	-3.14678	27.8158	1.33429e-07	1.48512e-05
	ENSMUSG00000076523.2	Igkv15-103	0	6.92682	237.224	9.76253	4.93702	11.0983	3.91098	1.12605	3.29498	30.9201	51.7701	4.85758	-3.17134	18.9904	1.31378e-05	0.000687787
	ENSMUSG00000022479.15	Vdr	8.38011	16.7106	18.428	119.874	148.759	13.723	2.685	4.27939	3.35594	37.355	62.4303	6.01083	-3.17752	21.938	2.81606e-06	0.000189472
	ENSMUSG00000000567.5	Sox9	18.6668	2.87339	8.84098	53.3005	48.6003	2.13633	3.26748	1.58832	1.11158	15.5984	26.4564	2.02593	-3.18169	25.3822	4.70248e-07	4.31482e-05
	ENSMUSG00000017002.14	Slpi	38.631	31.1129	239.303	88.7641	196.563	22.0385	4.19374	2.46535	19.9413	71.4459	118.875	12.1597	-3.18733	19.3553	1.08517e-05	0.000586082
	ENSMUSG00000001672.14	Marveld3	5.51295	4.10708	9.10835	57.317	54.4311	1.63292	1.45542	2.45301	2.2935	15.3679	26.0953	1.95871	-3.195	18.4191	1.77268e-05	0.000882889
	ENSMUSG00000066392.11	Nrxn3	9.27691	3.07763	13.4862	72.6634	12.1852	1.35584	1.62098	1.88454	1.06242	12.957	22.1379	1.48094	-3.22129	19.592	9.58693e-06	0.000524413
	ENSMUSG00000095204.6	Ighv1-52	0	0	74.4071	0	9.32037	0	0	0	3.59096	9.70205	16.7455	0.89774	-3.2251	20.5415	5.83522e-06	0.000340736
	ENSMUSG00000039481.5	Nrtn	1.24843	2.53196	12.5752	23.0006	112.413	3.83395	1.98188	2.46732	1.03622	17.8987	30.3538	2.32984	-3.23512	23.0669	1.56465e-06	0.000117463
	ENSMUSG00000023972.9	Ptk7	6.2382	9.7272	16.6061	63.0846	118.372	5.15549	3.53968	2.94823	2.94304	25.4016	42.8056	3.64661	-3.23687	22.7037	1.89008e-06	0.000137852
	ENSMUSG00000004864.12	Mapk13	3.69964	5.02911	9.82246	70.7652	54.2392	4.11055	1.68433	1.14089	1.5397	16.8923	28.7111	2.11887	-3.25191	27.871	1.29677e-07	1.44966e-05
	ENSMUSG00000076569.3	Igkv5-39	4.88186	125.571	149.964	0	5.01645	1.82655	5.86782	3.49728	8.98322	33.9565	57.0867	5.04372	-3.2647	19.7953	8.61924e-06	0.000479679
	ENSMUSG00000113545.1	Gm48238	3.4e-05	0	0	43.0906	0	0	0	0	0	4.78785	8.61813	0	-3.26576	18.5358	1.66743e-05	0.000833715
	ENSMUSG00000026994.9	Galnt3	16.8991	3.16169	11.6475	38.2236	55.5257	3.98572	0.176449	1.19688	1.44314	14.6955	25.0915	1.70055	-3.27226	26.393	2.78542e-07	2.75316e-05
	ENSMUSG00000023039.17	Krt7	11.1316	5.50591	17.8055	136.909	73.6798	4.52152	3.55959	4.00667	4.13156	29.0279	49.0064	4.05483	-3.30638	15.6321	7.69385e-05	0.00304425
	ENSMUSG00000027186.14	Elf5	32.952	26.3901	32.7641	151.611	152.95	7.41387	7.66019	8.09554	5.22547	47.2291	79.3334	7.09877	-3.31023	16.4342	5.03676e-05	0.00210002
	ENSMUSG00000029304.14	Spp1	101.231	32.8591	82.7399	429.63	692.605	14.9804	52.3644	31.7827	5.08224	160.364	267.813	26.0524	-3.31277	21.1724	4.1976e-06	0.000259562
	ENSMUSG00000033219.8	Gm9758	0	2.78069	2.42525	21.0642	18.6396	0	0	0	0	4.98997	8.98195	0	-3.31932	37.2123	1.05942e-09	2.13552e-07
	ENSMUSG00000027315.13	Spint1	7.08043	6.29504	13.1746	90.1966	69.0233	5.14447	1.2708	2.66687	2.19602	21.8942	37.154	2.81954	-3.32036	24.6964	6.71107e-07	5.70776e-05
	ENSMUSG00000115901.1	AL646044.1	100.473	8.11546	0.102494	40.5267	92.7851	0	7.73591	0	7.88733	28.6251	48.4006	3.90581	-3.33196	22.7329	1.86154e-06	0.000136549
	ENSMUSG00000040412.16	5330417C22Rik	2.96523	0.830131	9.6872	25.9412	17.5405	0.352257	0.114873	0.251034	0.177313	6.42886	11.3929	0.223869	-3.33999	41.0386	1.49255e-10	3.746e-08
	ENSMUSG00000021062.15	Rab15	10.832	5.66049	15.8019	64.1717	54.784	1.14019	4.11048	2.20898	0.86546	17.7306	30.25	2.08128	-3.34226	25.1115	5.41099e-07	4.8604e-05
	ENSMUSG00000094087.1	Ighv1-61	0	2.63395	54.867	0	1.33148	1.03056	0	0	0	6.65144	11.7665	0.25764	-3.34357	24.2611	8.41214e-07	6.90459e-05
	ENSMUSG00000044748.8	Defb1	0.555147	4.28732	6.26454	20.9439	13.7481	0	0	0	0	5.08878	9.1598	0	-3.3448	58.3556	2.1877e-14	2.80026e-11
	ENSMUSG00000029134.14	Plb1	13.3894	3.86877	4.30096	38.6543	36.2958	0.925417	0.931313	1.69681	0.437368	11.1667	19.3018	0.997727	-3.34518	27.7608	1.3728e-07	1.5149e-05
	ENSMUSG00000042793.13	Lgr6	7.34142	8.59251	10.8868	87.0995	117.09	1.0091	6.30213	5.99864	1.19268	27.2792	46.202	3.62564	-3.35113	22.9414	1.67011e-06	0.00012465
	ENSMUSG00000073988.13	Ttpa	10.6297	4.65552	7.63154	33.5213	28.416	0.850048	1.68026	0.223317	0.240793	9.76094	16.9708	0.748605	-3.36138	25.2	5.16817e-07	4.6751e-05
	ENSMUSG00000068740.13	Celsr2	11.974	11.7386	22.7099	91.45	133.351	3.89827	6.45377	4.35432	2.79486	32.0805	54.2447	4.3753	-3.36142	18.1292	2.06414e-05	0.0010027
	ENSMUSG00000032796.7	Lama1	2.05124	4.12764	9.44757	26.6053	19.7773	0.426304	0.353223	0.116761	0.223623	7.01433	12.4018	0.279978	-3.38824	46.6535	8.47165e-12	3.61457e-09
	ENSMUSG00000038599.14	Capn8	2.12199	0.7511	6.86805	44.4553	16.3052	0.148932	0.414553	1.12025	0.08042	8.02953	14.1003	0.441039	-3.3894	39.455	3.35703e-10	7.88439e-08
	ENSMUSG00000051076.8	Vtcn1	6.00922	1.76581	9.34663	33.873	25.141	0	1.10788	0.876785	0.189321	8.70107	15.2271	0.543497	-3.39413	36.9264	1.22677e-09	2.39734e-07
	ENSMUSG00000028919.11	Arhgef19	6.67428	2.35962	8.57832	39.7751	52.5534	0.269927	3.57677	0.870209	0.028418	12.7429	21.9881	1.18633	-3.39431	27.4061	1.6491e-07	1.77383e-05
	ENSMUSG00000032554.15	Trf	402.89	313.909	628.215	3785.97	2590.4	198.266	176.694	169.514	35.0949	922.328	1544.28	144.892	-3.40489	21.2066	4.12345e-06	0.000255594
	ENSMUSG00000000159.15	Igsf5	2.65406	1.27185	2.98916	46.2625	19.1296	1.18456	0.553592	0.056814	0	8.23357	14.4614	0.448742	-3.4158	27.4987	1.57203e-07	1.72721e-05
	ENSMUSG00000020159.8	Gabrp	10.312	0.353003	4.62137	13.9142	22.7225	0	0.063488	0.178131	0	5.79608	10.3846	0.0604048	-3.4244	65.1591	6.90871e-16	1.60784e-12
	ENSMUSG00000032068.14	Plet1	21.9456	13.6623	24.494	75.3683	90.7928	2.10859	3.30712	5.88195	1.93012	26.6101	45.2526	3.30694	-3.4248	26.4405	2.71785e-07	2.72334e-05
	ENSMUSG00000054662.8	Ano9	2.73883	1.49862	4.8771	32.8888	16.2187	0	0.20458	0.360006	0.142364	6.54767	11.6444	0.176737	-3.42564	50.9244	9.59936e-13	6.14359e-10
	ENSMUSG00000051397.5	Tacstd2	7.07242	2.63919	7.99773	30.6099	34.0726	1.5971	0.258663	0.258629	0.361928	9.4298	16.4784	0.61908	-3.43232	36.8961	1.24598e-09	2.41645e-07
	ENSMUSG00000031870.16	Pgr	10.5381	4.94892	20.1603	72.3852	22.3894	1.57825	2.58229	1.44106	0.412702	15.1596	26.0844	1.50358	-3.4354	31.3047	2.2054e-08	3.20929e-06
	ENSMUSG00000037254.18	Itih2	0.192269	0.96948	2.89775	47.0589	10.7596	0	0.382447	0.488204	0.031537	6.97558	12.3756	0.225547	-3.44811	42.2416	8.0664e-11	2.20732e-08
	ENSMUSG00000017390.15	Aldoc	5.01867	3.498	9.16796	57.6265	79.3463	2.63065	2.25696	1.07312	1.72947	18.0386	30.9315	1.92255	-3.44968	28.4862	9.43675e-08	1.09809e-05
	ENSMUSG00000084128.10	Esrp2	14.0532	13.5612	25.2774	132.018	110.96	3.59917	3.64812	6.16337	4.53452	34.8683	59.174	4.4863	-3.45524	17.386	3.05059e-05	0.00137734
	ENSMUSG00000008601.12	Rab25	6.90345	5.60054	14.5467	50.2324	78.6702	1.98416	1.23294	0.827059	3.55752	18.1728	31.1907	1.90042	-3.47231	31.4905	2.00417e-08	2.96571e-06
	ENSMUSG00000067006.12	Serpinb5	7.48156	2.74319	5.19971	16.773	29.8039	0.136087	0.314255	0.331694	0.039368	6.98031	12.4003	0.205351	-3.47474	49.5091	1.97459e-12	1.12332e-09
	ENSMUSG00000064246.10	Chil1	7.41185	34.414	31.247	192.046	181.158	7.35067	7.07701	5.67318	7.92212	52.7	89.2554	7.00575	-3.49491	27.4253	1.63283e-07	1.76839e-05
	ENSMUSG00000026051.8	1500015O10Rik	3.7055	6.27246	8.75127	25.028	74.7068	1.09321	1.07534	1.86638	0.680675	13.6866	23.6928	1.1789	-3.50242	29.6422	5.19601e-08	6.65089e-06
	ENSMUSG00000060969.9	Irx1	5.55382	8.59934	10.8679	57.3415	92.9072	2.61258	2.6703	1.63977	1.66699	20.4288	35.054	2.14741	-3.51792	33.1487	8.53744e-09	1.42849e-06
	ENSMUSG00000018849.6	Wwc1	4.14965	3.49403	15.1011	50.2441	62.0133	1.81818	1.46579	0.792433	1.3127	15.599	27.0004	1.34728	-3.57639	32.7465	1.04993e-08	1.72297e-06
	ENSMUSG00000010080.15	Epn3	4.05078	5.50389	5.82158	29.2601	33.536	0.22833	0.664034	0.583953	0.049662	8.85537	15.6345	0.381495	-3.58987	26.6734	2.4091e-07	2.46692e-05
	ENSMUSG00000072949.6	Acot1	25.4589	19.1813	43.2334	103.106	85.9297	5.48016	4.78498	2.46262	1.94559	32.3981	55.3819	3.66834	-3.59425	16.3237	5.33916e-05	0.00220812
	ENSMUSG00000029838.11	Ptn	21.2483	9.5042	43.9719	207.934	60.3109	3.12239	9.51507	4.91958	1.39323	40.2133	68.5939	4.73757	-3.60045	26.6106	2.48877e-07	2.52828e-05
	ENSMUSG00000080904.1	Gm11966	0	0	0	57.9482	0	0	0	0	0	6.43869	11.5896	0	-3.65417	14.9103	0.000112743	0.00418294
	ENSMUSG00000012350.15	Ehf	80.9571	34.3131	58.9681	202.266	201.525	11.3171	3.97335	8.41867	8.2172	67.7728	115.606	7.98158	-3.69853	32.3546	1.28452e-08	2.05523e-06
	ENSMUSG00000051159.16	Cited1	9.22512	3.14103	13.1203	242.497	61.099	7.93521	4.71209	2.68696	1.22654	38.4048	65.8165	4.1402	-3.70031	33.4033	7.48962e-09	1.28681e-06
	ENSMUSG00000027570.15	Col9a3	18.8577	27.1745	42.2304	61.1231	384.065	6.9774	6.9241	6.62015	8.19658	62.4632	106.69	7.17956	-3.71872	27.2294	1.80691e-07	1.93543e-05
	ENSMUSG00000031284.16	Pak3	2.62668	1.57332	5.20713	17.4249	50.5977	0.237274	0.350636	0.225406	0.182167	8.71391	15.4859	0.248871	-3.72254	29.3355	6.08707e-08	7.56452e-06
	ENSMUSG00000028786.15	Tmem54	1.85781	0.546531	3.39997	25.6607	31.2682	0	0	0.103275	0	6.98183	12.5466	0.0258188	-3.72309	53.524	2.55449e-13	2.10952e-10
	ENSMUSG00000018907.10	Alox12e	3.23915	5.57276	4.1045	32.361	33.7406	0.845799	0.147521	0.070897	0	8.89803	15.8036	0.266054	-3.73036	54.0835	1.92148e-13	1.63966e-10
	ENSMUSG00000000706.16	Btn1a1	26.1155	18.4213	37.7859	199.935	116.028	5.82484	4.17976	8.39137	1.70924	46.4879	79.6571	5.0263	-3.74246	27.7607	1.37287e-07	1.5149e-05
	ENSMUSG00000037541.21	Shank2	4.21443	4.21987	6.525	39.8345	56.7259	0.940853	0.69695	0.772727	0.468142	12.7109	22.3039	0.719668	-3.76037	29.4609	5.70573e-08	7.1954e-06
	ENSMUSG00000111402.1	AC109138.6	0	43.3466	9.04637	0	13.0902	2.1e-05	0	0	3.1e-05	7.27591	13.0966	1.3e-05	-3.81726	10.6625	0.00109328	0.0272787
	ENSMUSG00000038765.13	Lmx1b	3.85925	1.98177	6.22251	56.7707	23.5796	0.046207	0.814182	0.524164	0.13634	10.4372	18.4828	0.380223	-3.81922	42.311	7.7854e-11	2.16637e-08
	ENSMUSG00000035131.14	Brinp3	0.07274	1.65022	0.417131	3.80865	74.3795	0.288734	0.15887	0.112414	0.258463	9.0163	16.0656	0.20462	-3.82444	48.4714	3.35146e-12	1.61882e-09
	ENSMUSG00000041605.16	5730559C18Rik	0.84939	5.17969	11.2514	24.6119	49.6353	1.02549	0.38141	0	0	10.3261	18.3055	0.351725	-3.83614	46.0095	1.17684e-11	4.63493e-09
	ENSMUSG00000028626.5	Col9a2	1.56279	5.33106	6.45318	25.5229	126.172	2.82102	1.26743	0.778172	0.527935	18.9374	33.0084	1.34864	-3.85599	37.3326	9.96046e-10	2.05635e-07
	ENSMUSG00000005268.20	Prlr	51.8472	21.9323	68.2759	417.92	128.269	7.84917	11.6585	8.8685	5.87398	80.2772	137.649	8.56254	-3.8579	28.5917	8.9363e-08	1.04461e-05
	ENSMUSG00000022991.5	Lalba	43.1671	10.0593	7.64165	124.093	148.391	4.47006	1.95361	7.55759	0.678662	38.668	66.6704	3.66498	-3.85858	30.5888	3.18928e-08	4.4615e-06
	ENSMUSG00000070803.6	Cited4	7.57507	5.79178	16.3513	41.1501	166.648	2.97919	1.47165	3.37093	1.51913	27.4286	47.5033	2.33522	-3.86223	31.2439	2.27564e-08	3.29131e-06
	ENSMUSG00000028262.13	Clca3a2	72.8576	23.6147	23.1961	154.877	164.021	2.09178	8.88462	7.10489	2.08232	50.97	87.7133	5.0409	-3.87631	24.3497	8.03382e-07	6.65585e-05
	ENSMUSG00000040434.16	Large2	5.43999	4.96161	12.8061	45.0765	65.0241	1.42064	0.595933	0.430146	0.89362	15.1832	26.6617	0.835085	-3.91397	41.077	1.46347e-10	3.7094e-08
	ENSMUSG00000105948.1	Gm43089	5.21363	5.04566	5.45242	54.0078	34.0566	0	0	0	1.62686	11.7114	20.7552	0.406715	-3.95096	24.1916	8.72138e-07	7.02098e-05
	ENSMUSG00000022025.13	Cnmd	11.0654	1.77085	3.79735	4.09524	99.673	0.491342	0.279351	0.718871	0.899959	13.6435	24.0804	0.597381	-3.97278	48.7869	2.85338e-12	1.49075e-09
	ENSMUSG00000030849.18	Fgfr2	45.7885	29.115	64.102	350.41	158.449	7.70931	7.41035	6.81426	6.84171	75.1822	129.573	7.19391	-3.99416	29.7458	4.92567e-08	6.33653e-06
	ENSMUSG00000006269.7	Atp6v1b1	25.5852	18.3497	25.4169	169.186	183.464	5.94439	4.234	6.16182	1.07404	48.824	84.4004	4.35356	-3.99567	34.1381	5.13351e-09	9.0633e-07
	ENSMUSG00000076591.3	Igkv8-16	0	0	2.78638	65.9109	16.2382	0	0.47495	0	0	9.49005	16.9871	0.118737	-4.00702	36.6462	1.41637e-09	2.7059e-07
	ENSMUSG00000025783.2	4930412O13Rik	4.34145	5.35421	9.61815	63.1513	38.744	0.547117	0.668018	0.405395	0.56594	13.7106	24.2418	0.546617	-4.02863	38.8706	4.52842e-10	1.01992e-07
	ENSMUSG00000103574.1	Gm37116	70.0909	0	0	6.71575	0	0	0	0	0	8.53407	15.3613	0	-4.03222	14.9016	0.000113266	0.0041869
	ENSMUSG00000029055.17	Plch2	8.88245	3.62647	8.72612	73.5023	45.842	1.54114	0.535021	0.54175	0.498922	15.9662	28.1159	0.779208	-4.0325	42.1252	8.56118e-11	2.30701e-08
	ENSMUSG00000050808.13	Muc15	55.8183	13.0979	8.20804	48.9857	47.0985	0.699919	1.10328	1.5799	1.28949	19.7646	34.6417	1.16815	-4.03903	43.1889	4.97008e-11	1.47946e-08
	ENSMUSG00000047730.17	Fcgbp	92.5471	81.9946	90.9838	645.001	712.349	24.249	17.361	30.0417	3.37743	188.656	324.575	18.7573	-4.04253	32.1486	1.42817e-08	2.27089e-06
	ENSMUSG00000032013.6	Trim29	3.28546	2.3161	10.8076	36.7067	38.3209	0.124981	0.077385	0.387613	0.072299	10.2332	18.2874	0.16557	-4.04855	57.8162	2.87786e-14	3.34878e-11
	ENSMUSG00000070419.11	Cyp3a57	8.06518	2.94205	10.9928	68.793	9.36303	0	0.368942	0.370832	0.309914	11.2451	20.0312	0.262422	-4.05827	52.7502	3.78779e-13	2.7705e-10
	ENSMUSG00000026413.12	Pkp1	8.04402	2.20365	14.0587	39.534	36.5992	0.289313	0.139317	0.166894	0.454867	11.2767	20.0879	0.262598	-4.06195	55.9496	7.43512e-14	7.61356e-11
	ENSMUSG00000115486.1	AC140208.1	78.8866	0	0	0	0	0	0	0	0	8.76518	15.7773	0	-4.06844	31.9496	1.58225e-08	2.485e-06
	ENSMUSG00000035451.7	Foxa1	3.42337	2.21238	9.08585	72.4333	18.7886	0.035233	0.597882	0.367003	0.213953	11.9064	21.1887	0.303518	-4.08934	47.6573	5.07641e-12	2.27993e-09
	ENSMUSG00000003051.13	Elf3	3.58122	4.7126	9.84602	48.1705	49.2609	0	0.664646	0.791516	0.097236	13.0138	23.1142	0.38835	-4.11844	45.8307	1.28927e-11	4.92616e-09
	ENSMUSG00000096833.2	Igkv4-55	2.17622	2.01816	144.442	0	5.4857	0	0.47495	2.19002	0.640841	17.492	30.8244	0.826453	-4.12302	32.1138	1.454e-08	2.29768e-06
	ENSMUSG00000015519.12	2310057J18Rik	66.8123	0.565662	4.18182	8.62199	12.4592	0	0.127068	0.268115	0.078801	10.3461	18.5282	0.118496	-4.12593	63.0673	1.99758e-15	3.9337e-12
	ENSMUSG00000045394.8	Epcam	28.8926	11.2984	27.6358	109.755	107.458	2.59668	1.71764	2.7069	1.85382	32.6572	57.008	2.21876	-4.17167	37.2164	1.05723e-09	2.13552e-07
	ENSMUSG00000000792.2	Slc5a5	3.45344	3.49447	19.7905	94.4676	27.173	0.27072	1.19696	0.892128	0.301991	16.7823	29.6758	0.66545	-4.20312	46.3187	1.00502e-11	4.08388e-09
	ENSMUSG00000053522.11	Lgals7	8.28686	4.84661	14.0244	50.219	112.291	0.802871	0	3.50332	0	21.5527	37.9336	1.07655	-4.22876	48.0433	4.1691e-12	1.94053e-09
	ENSMUSG00000078126.4	Rpl23a-ps3	0	0	0	54.5791	35.0125	0	0	0	0	9.95462	17.9183	0	-4.24171	52.0592	5.38518e-13	3.82946e-10
	ENSMUSG00000001504.10	Irx2	20.5417	21.1279	34.8159	142.572	147.273	0.915137	5.93141	2.226	1.95393	41.9286	73.2661	2.75662	-4.3052	31.3438	2.16147e-08	3.18009e-06
	ENSMUSG00000027376.15	Prom2	23.5076	3.00927	40.1353	65.4307	66.2198	3.20429	0.423295	0.352557	0.091342	22.486	39.6605	1.01787	-4.33272	55.5011	9.34075e-14	9.19705e-11
	ENSMUSG00000035557.9	Krt17	5.7548	7.59818	8.90112	65.9801	50.5755	0.158301	0.245928	0.884687	0.137568	15.5818	27.7619	0.356621	-4.40607	54.3949	1.6399e-13	1.49934e-10
	ENSMUSG00000020566.19	Atp6v1c2	7.19855	5.00438	3.45274	42.3816	96.5679	0.598667	0.582838	0.223207	0.347126	17.373	30.921	0.43796	-4.47241	51.0356	9.07072e-13	6.06793e-10
	ENSMUSG00000022435.6	Upk3a	0.163419	0.738884	8.1466	98.6136	8.05695	0	0	0.090604	0	12.8678	23.1439	0.022651	-4.56127	76.5562	2.14029e-18	9.13192e-15
	ENSMUSG00000018569.12	Cldn7	12.6489	11.5868	28.3701	106.86	128.126	2.9145	1.25733	1.05902	0.329382	32.5724	57.5184	1.39006	-4.61377	45.0345	1.93598e-11	6.98043e-09
	ENSMUSG00000070702.9	Csn1s1	483.612	169.354	72.4126	481.527	1462.27	22.8809	27.1051	23.3148	4.72112	305.244	533.835	19.5055	-4.70501	37.9011	7.44221e-10	1.58767e-07
	ENSMUSG00000040728.15	Esrp1	32.7194	8.9158	25.236	103.935	117.767	0.880023	2.16399	1.41571	0.238979	32.5858	57.7146	1.17468	-4.75485	51.5875	6.84751e-13	4.73774e-10
	ENSMUSG00000044217.17	Aqp5	13.9906	4.06795	15.1029	124.739	77.8932	0.821639	1.20103	0.775297	0.152463	26.5271	47.1587	0.737607	-4.79262	54.1893	1.82076e-13	1.60729e-10
	ENSMUSG00000047501.3	Cldn4	17.661	6.20026	23.1868	131.482	113.544	1.58115	1.02218	1.37394	0.514999	32.9518	58.4148	1.12307	-4.8066	49.6393	1.84776e-12	1.08385e-09
	ENSMUSG00000070473.4	Cldn3	13.0219	13.057	37.5885	121.073	175.031	1.22073	1.83725	2.12411	0.707871	40.629	71.9543	1.47249	-4.88296	47.32	6.02949e-12	2.66129e-09
	ENSMUSG00000110458.1	Gm21769	0	14.7919	0	23.5213	104.768	0	0	0	0	15.8979	28.6162	0	-4.88832	27.8976	1.27907e-07	1.43615e-05
	ENSMUSG00000061937.7	Csn1s2a	13.898	81.6889	33.5506	141.323	393.172	7.45135	1.16654	4.75839	0.662677	75.2968	132.726	3.50974	-4.8901	44.011	3.26537e-11	1.09991e-08
	ENSMUSG00000000385.7	Tmprss2	16.0577	8.27272	41.9599	246.993	94.6317	0.783611	2.86538	2.49117	0.741593	46.0885	81.583	1.72044	-4.92393	48.2613	3.73036e-12	1.76847e-09
	ENSMUSG00000017723.11	Wfdc2	10.0931	8.04777	31.3715	156.418	133.853	2.03587	1.68407	1.29822	0	38.3113	67.9567	1.25454	-4.93479	46.4261	9.51378e-12	3.92827e-09
	ENSMUSG00000020911.14	Krt19	152.021	40.6359	177.728	1256.85	395.979	6.73244	22.4809	17.5094	2.00951	230.216	404.643	12.1831	-4.94345	41.2439	1.34368e-10	3.47457e-08
	ENSMUSG00000026258.5	3110079O15Rik	17.2594	2.02714	14.9676	21.8213	114.528	0	0	0	0.37764	18.9979	34.1207	0.09441	-5.0041	57.5933	3.22321e-14	3.58758e-11
	ENSMUSG00000027966.20	Col11a1	6.24756	2.57008	4.30494	11.1188	409.83	0.698985	3.22069	2.05519	0.686244	48.9703	86.8143	1.66528	-5.0421	54.7633	1.35958e-13	1.28908e-10
	ENSMUSG00000026822.14	Lcn2	78.3834	58.7463	135.891	821.646	815.946	14.397	11.567	12.362	3.27146	216.912	382.123	10.3994	-5.07078	43.1545	5.05833e-11	1.48843e-08
	ENSMUSG00000061527.7	Krt5	10.7064	9.83909	19.9491	79.5145	87.2786	0.637029	0.230339	0.039522	0.138254	23.1481	41.4575	0.261286	-5.07305	69.1518	9.11669e-17	2.59319e-13
	ENSMUSG00000026668.10	Ucma	0	0.977306	0	1.07425	163.46	0	0	0	0	18.3902	33.1023	0	-5.0918	70.1246	5.56756e-17	1.78162e-13
	ENSMUSG00000045545.8	Krt14	8.67632	15.0704	19.5103	65.1768	155.339	0.352334	0.805786	0.636448	0.43296	29.5556	52.7546	0.556882	-5.10966	60.1482	8.79769e-15	1.32483e-11
	ENSMUSG00000029378.5	Mcub	18.0408	13.8356	57.5961	362.23	51.0941	2.76369	0.264912	1.34777	3.32909	56.7225	100.559	1.92637	-5.11707	50.9984	9.24412e-13	6.06793e-10
	ENSMUSG00000049382.10	Krt8	34.8641	18.7252	69.0237	375.856	227.79	3.44568	3.48725	4.05145	1.62731	82.0967	145.252	3.15292	-5.13818	47.9728	4.32164e-12	1.97561e-09
	ENSMUSG00000063157.9	Csn2	78.3798	75.0787	57.4477	341.181	639.839	10.4165	1.22098	6.55069	1.44467	134.618	238.385	4.90821	-5.34047	48.5134	3.28047e-12	1.61882e-09
	ENSMUSG00000023043.7	Krt18	86.2645	33.4568	136.744	792.78	387.303	7.36602	8.0297	7.0404	1.58197	162.285	287.31	6.00452	-5.36319	48.9375	2.64244e-12	1.4093e-09
	ENSMUSG00000085791.4	Rpl30-ps9	211.437	1e-06	0.002909	0	0	0	0	0	0.00198	23.4935	42.288	0.000495	-5.43518	58.8303	1.71872e-14	2.31575e-11
	ENSMUSG00000066009.8	Zfp987	91.8807	47.6404	134.011	0.186557	69.0415	0	0.050421	0.151201	1.07908	38.2268	68.552	0.320176	-5.71929	10.141	0.00145009	0.0339327
	ENSMUSG00000000983.13	Wfdc18	103.718	10.1755	46.2482	153.162	196.671	0	0.984515	1.09532	0.640199	56.9661	101.995	0.680009	-5.93796	64.2353	1.1041e-15	2.35542e-12
	ENSMUSG00000091204.8	Gm7271	419.688	0	0	0	0	0	0	0	0	46.632	83.9376	0	-6.40833	107.536	3.39651e-25	8.69508e-21
	ENSMUSG00000022483.17	Col2a1	5.5181	0.378541	0.8135	2.5189	770.428	1.22541	0.600507	0.619926	0.267678	86.9301	155.931	0.67838	-6.54692	86.9509	1.11249e-20	9.49324e-17
	ENSMUSG00000078087.5	Rps12l1	381.105	0	0.43976	155.791	0	0.116968	0	0	1e-06	59.717	107.467	0.0292423	-6.71953	81.8948	1.4353e-19	7.34872e-16
