# Supplementary material for: Cabergoline as a Novel Strategy for Post-Pregnancy Breast Cancer Prevention in Mice and Human
Source: Research Square preprint supplement (doi:10.21203/rs.3.rs-3854490/v1), 2024-02-05
Supplement: Supplementary file 13 [file bb552ba590796f8bc51de2de.xlsx]

## Sheet: Supplementary Table S17
				Variable	Category	Global	Control (n=14030)	Exposition (n=780)	P value
			Sociodemographic characteristics	Age at index date (mean, SD)		33.69 (3.05)	33.69 (3.05)	33.65 (3.03)	0.732
				Level of socioeconomic deprivation MEDEA (n, %)					0.091
					Lowest deprivation quintile	1511 (10.20%)	1445 (10.30%)	66 (8.46%)
					Q2	2138 (14.44%)	2024 (14.43%)	114 (14.62%)
					Q3	2185 (14.75%)	2058 (14.67%)	127 (16.28%)
					Q4	2054 (13.87%)	1930 (13.76%)	124 (15.90%)
					Highest deprivation quintile	1719 (11.61%)	1626 (11.59%)	93 (11.92%)
					Rural	2892 (19.53%)	2735 (19.49%)	157 (20.13%)
					Unknown	2311 (15.60%)	2212 (15.77%)	99 (12.69%)
				Duration of pregnancy (mean, SD)		39.50 (1.76)	39.51 (1.77)	39.44 (1.60)	0.248
			Diagnostics	Obesity (n, %)		1208 (8.16%)	1137 (8.10%)	71 (9.10%)	0.355
				Dyslipidemia (n, %)		572 (3.86%)	543 (3.87%)	29 (3.72%)	0.905
				Arterial hypertension (n, %)		148 (1.00%)	137 (0.98%)	11 (1.41%)	0.317
				Type 1 diabetes mellitus (n, %)		26 (0.18%)	25 (0.18%)	1 (0.13%)	1
				Type 2 diabetes mellitus (n, %)		32 (0.22%)	30 (0.21%)	2 (0.26%)	1
				Neoplasia (no breast cancer)		106 (0.72%)	99 (0.71%)	7 (0.90%)	0.689
				Family history of other malignancies (no breast cancer) (n, %)		98 (0.66%)	91 (0.65%)	7 (0.90%)	0.544
				Family history of breast cancer (n, %)		140 (0.95%)	132 (0.94%)	8 (1.03%)	0.962
				Personal history of other malignancies (n, %)		4 (0.03%)	3 (0.02%)	1 (0.13%)	0.517
				Previous chemotherapy (n, %)		3 (0.02%)	3 (0.02%)	0 (0.00%)	1
				Polycystic ovarian disease (n, %)		324 (2.19%)	309 (2.20%)	15 (1.92%)	0.694
				Hormone replacement therapy (n, %)		2441 (16.48%)	2273 (16.20%)	168 (21.54%)	<0.001
				Hormone replacement therapy (n of package, IR)		5.00 [2.00, 13.00]	5.00 [2.00, 13.00]	6.00 [2.00, 12.25]	0.721
				Drugs of breast cancer prevention (n, %)		10 (0.07%)	9 (0.06%)	1 (0.13%)	1
				Previous mammography (n, %)		653 (4.41%)	618 (4.40%)	35 (4.49%)	0.985
			Risk factors	Smoking status (n, %)					<0.001
					Never smoker	8001 (58.34%)	7620 (58.76%)	381 (51.14%)
					Current smoker	3068 (22.37%)	2860 (22.05%)	208 (27.92%)
					Former smoker	2645 (19.29%)	2489 (19.19%)	156 (20.94%)
				Height (cm, IR)		163.00 [159.00, 167.00]	163.00 [159.00, 167.00]	163.00 [159.00, 167.00]	0.842
				Weight (Kg, IR)		71.80 [64.00, 80.15]	71.70 [64.00, 80.00]	72.50 [64.50, 81.05]	0.068
				Body mass index (Kg/m2, IR)		27.01 [24.35, 30.10]	26.99 [24.34, 30.10]	27.33 [24.72, 30.12]	0.057
				Alcohol intake (n, %)					0.012
					No consumption	6069 (77.16%)	5716 (76.90%)	353 (81.71%)
					Low risk	1748 (22.23%)	1674 (22.52%)	74 (17.13%)
					Risk	48 (0.61%)	43 (0.58%)	5 (1.16%)
				Physical activity (n, %)					0.623
					0	150 (7.92%)	143 (8.04%)	7 (6.09%)
					1	320 (16.90%)	305 (17.14%)	15 (13.04%)
					2	507 (26.77%)	474 (26.64%)	33 (28.70%)
					3	869 (45.88%)	811 (45.59%)	58 (50.43%)
					4	48 (2.53%)	46 (2.59%)	2 (1.74%)
				Cardiovascular risk (HR, 95% CI)		0.37 [0.26, 0.61]	0.37 [0.26, 0.62]	0.39 [0.24, 0.55]	0.775
			Follow-up characteristics	Breast cancer (n, %)					0.077
					Breast cancer development	134 (0.90%)	132 (0.94%)	2 (0.26%)
					Without breast cancer	14676 (99.10%)	13898 (99.06%)	778 (99.74%)
