# Supplementary material for: Cabergoline as a Novel Strategy for Post-Pregnancy Breast Cancer Prevention in Mice and Human
Source: Research Square preprint supplement (doi:10.21203/rs.3.rs-3854490/v1), 2024-02-05
Supplement: Supplementary file 14 [file c3dd72c4a3976bc9e4fa7944.xlsx]

## Sheet: Supplementary Table S20
	Variable	Category	HR	2.5%	97.5%	P value
	Exposition group	Without exposition	(ref.)
		Exposition	0.239	0.059	0.968	0.045
	Age		1.161	1.12	1.204	<0.001
	Level of socioeconomic deprivation MEDEA	Lowest deprivation quintile	2.363	1.118	4.995	0.024
		Q2	1.915	0.942	3.891	0.073
		Q3	(ref.)
		Q4	1.569	0.767	3.209	0.218
		Highest deprivation quintile	1.182	0.553	2.525	0.666
		Rural	1.021	0.492	2.12	0.955
		Unknown	2.259	1.135	4.497	0.02
	Family history of breast cancer		3.188	0.788	12.888	0.104
	Family history of other malignancies (no breast cancer)		2.033	0.284	14.547	0.48
	Obesity		0.647	0.285	1.469	0.298
	Type 2 Diabetes Mellitus		5.472	0.765	39.15	0.09
	Smoking status	Never smoker	(ref.)
		Current smoker	0.734	0.413	1.305	0.292
		Former smoker	0.768	0.465	1.268	0.302
	BMI	<=25	(ref.)
		(25, 30]	1.304	0.869	1.955	0.2
		>30	0.645	0.373	1.114	0.116
		Unknown	1.299	0.462	3.649	0.62
	Alcohol intake	Low risk	(ref.)
		Risk	0.701	0.334	1.47	0.347
		Unknown	0.674	0.47	0.966	0.032
	Physical activity	0	(ref.)
		1-2	0.225	0.045	1.113	0.067
		3-4	0.506	0.134	1.908	0.315
		Unknown	0.329	0.104	1.034	0.057
	Polycystic ovarian disease		0.976	0.241	3.946	0.972
	Hormone replacement therapy		1.559	0.984	2.47	0.059
	Drugs of breast cancer prevention		0	0	Inf	0.995
	Previous mammography		3.554	1.961	6.441	<0.001
