# Supplementary material for: Cabergoline as a Novel Strategy for Post-Pregnancy Breast Cancer Prevention in Mice and Human
Source: Research Square preprint supplement (doi:10.21203/rs.3.rs-3854490/v1), 2024-02-05
Supplement: Supplementary file 15 [file ce79a973d9acbfa70e46869b.xlsx]

## Sheet: Supplementary Table S1
	ENS	Symbol	Z1_Cab	Z2_Cab	Z4_Cab	Z5_Cab	X1_Mult	X2_Mult	X3_Mult	X4_Mult	X5_Mult	Exp_Mean	Mean_Mult	Mean_Cab	Log2FC	Stat	P value	P adj	Sd Cab	DER Cab	Sd Mult	DER Mult
	ENSMUSG00000094345.2	Igkv14-126	0.770705	0.847464	0.554632	125.874	0.172859	1.95311	3.48342	0	0	14.8507	1.12188	32.0117	3.95956	42.9819	5.52475e-11	4.68977e-07	62.575	1.95475	1.55609	1.38704
	ENSMUSG00000076613.4	Ighg2b	0.909116	10.7154	7.98818	148.907	0.482976	4.9517	6.30517	0.296609	0.741015	20.1441	2.55549	42.1299	3.60057	28.7464	8.25049e-08	0.000262634	71.3046	1.69249	2.85009	1.11528
	ENSMUSG00000076612.8	Ighg2c	0.186625	9.70214	7.05332	74.7262	0.207707	4.4543	7.6357	0.068692	0.395611	11.6034	2.5524	22.9171	2.75117	24.8696	6.13417e-07	0.00126016	34.7714	1.51727	3.38287	1.32537
	ENSMUSG00000095285.2	Ighv5-9	0	1.54371	1.81642	10.3495	0.314643	0.21391	0	0	0	1.58202	0.105711	3.42741	2.00149	21.9357	2.81946e-06	0.00377897	4.68352	1.36649	0.149067	1.41014
	ENSMUSG00000094689.1	Ighv1-81	0.735185	0.344082	0.908427	7.84529	0	0	0	0	0	1.09255	0	2.45825	1.79004	24.2768	8.34384e-07	0.00148609	3.59911	1.4641	0	#NUM!
	ENSMUSG00000102313.1	Ighv1-62-1	3.61302	0	0.944242	0.331957	0	0	0	0	0	0.543247	0	1.2223	1.15206	18.1714	2.0189e-05	0.0190419	1.6411	1.34262	0	#NUM!
	ENSMUSG00000116378.1	Gcat	0.274324	0.484146	0.438586	0.137125	0	4e-06	0.270138	0	0	0.178258	0.0540284	0.333545	0.339353	16.9832	3.77124e-05	0.0342995	0.158957	0.476569	0.120809	2.23603
	ENSMUSG00000116252.1	MF597757.1 (Ahnak2)	0	0.180545	0.254305	0.00015	0	0	0	0	0	0.0483333	0	0.10875	0.148934	22.7066	1.88721e-06	0.00282704	0.129049	1.18666	0	#NUM!
	ENSMUSG00000062345.10	Serpinb2	0	0	0.017289	0	0.150535	0	0	0.768966	0.228054	0.129427	0.229511	0.00432225	-0.291862	35.9377	2.03732e-09	1.29706e-05	0.0086445	2	0.317254	1.38231
	ENSMUSG00000062751.5	Prss1	0	1e-06	1e-06	2e-06	1e-06	2e-06	3.14162	0	0	0.34907	0.628325	1e-06	-0.703387	23.3382	1.35872e-06	0.00216257	8.16497e-07	0.816497	1.40497	2.23607
	ENSMUSG00000096672.1	Ighv1-63	0.216229	0	0	0	5.71348	0.344147	0	0	0.426541	0.744489	1.29683	0.0540573	-1.12369	19.8239	8.49133e-06	0.00940175	0.108115	2	2.47666	1.90977
	ENSMUSG00000044748.8	Defb1	1.75246	1.93667	1.2028	0.334812	4.62301	0.111148	0.23346	13.1027	6.10093	3.26644	4.83425	1.30669	-1.33873	16.6591	4.47358e-05	0.0379748	0.71901	0.550255	5.32662	1.10185
	ENSMUSG00000035606.8	Ky	0.434748	0.29319	0.06371	0.556045	0	1.11404	12.1113	0	1.11521	1.74314	2.86811	0.336923	-1.53271	16.661	4.46899e-05	0.0379748	0.211457	0.627612	5.19707	1.81202
	ENSMUSG00000076543.2	Igkv4-74	0.454492	0.215011	2.16643	1.35365	1.36143	3.66347	1.54008	6.25223	18.0526	3.89549	6.17396	1.0474	-1.80898	21.9491	2.79979e-06	0.00377897	0.892642	0.852249	6.929	1.12229
