# Supplementary material for: Cabergoline as a Novel Strategy for Post-Pregnancy Breast Cancer Prevention in Mice and Human
Source: Research Square preprint supplement (doi:10.21203/rs.3.rs-3854490/v1), 2024-02-05
Supplement: Supplementary file 16 [file dc3c6ec4861857b9a157090e.xlsx]

## Sheet: Supplementary Table S11
	GO_BP_DOWN DEGs
	ID	Description	Gene Ratio	Bg Ratio	P value	P_Adj	q value	Gene ID	Count
	GO:0019432	triglyceride biosynthetic process	6/78	40/28943	1.12359e-09	1.75393e-06	1.28326e-06	Rgn/Mogat1/Mogat2/Pnpla3/Dgat2/Thrsp	6
	GO:0046460	neutral lipid biosynthetic process	6/78	53/28943	6.5364e-09	3.40111e-06	2.48842e-06	Rgn/Mogat1/Mogat2/Pnpla3/Dgat2/Thrsp	6
	GO:0046463	acylglycerol biosynthetic process	6/78	53/28943	6.5364e-09	3.40111e-06	2.48842e-06	Rgn/Mogat1/Mogat2/Pnpla3/Dgat2/Thrsp	6
	GO:0050873	brown fat cell differentiation	6/78	62/28943	1.717e-08	6.7006e-06	4.90249e-06	Lep/Adipoq/Mrap/Scd1/Adig/Ucp1	6
	GO:0006641	triglyceride metabolic process	7/78	112/28943	2.26418e-08	7.06878e-06	5.17187e-06	Rgn/Mogat1/Mogat2/Pnpla3/Dgat2/Scd1/Thrsp	7
	GO:0006639	acylglycerol metabolic process	7/78	147/28943	1.47581e-07	3.60919e-05	2.64066e-05	Rgn/Mogat1/Mogat2/Pnpla3/Dgat2/Scd1/Thrsp	7
	GO:0006638	neutral lipid metabolic process	7/78	149/28943	1.61847e-07	3.60919e-05	2.64066e-05	Rgn/Mogat1/Mogat2/Pnpla3/Dgat2/Scd1/Thrsp	7
	GO:0046364	monosaccharide biosynthetic process	6/78	97/28943	2.56148e-07	4.89203e-05	3.57925e-05	Rgn/Lep/Adipoq/Dgat2/Gpd1/Rbp4	6
	GO:0006071	glycerol metabolic process	4/78	21/28943	2.82051e-07	4.89203e-05	3.57925e-05	Mogat1/Mogat2/Lep/Dgat2	4
	GO:0019400	alditol metabolic process	4/78	24/28943	4.97701e-07	7.76912e-05	5.68427e-05	Mogat1/Mogat2/Lep/Dgat2	4
	GO:0001659	temperature homeostasis	7/78	189/28943	8.09147e-07	0.000114825	8.40119e-05	Fcor/Lep/Adipoq/Elovl3/Scd1/Cidea/Ucp1	7
	GO:0046486	glycerolipid metabolic process	9/78	382/28943	9.04313e-07	0.000117636	8.60684e-05	Rgn/Mogat1/Mogat2/Pon1/Pnpla3/Dgat2/Gpd1/Scd1/Thrsp	9
	GO:0019216	regulation of lipid metabolic process	9/78	388/28943	1.02863e-06	0.000123515	9.037e-05	Rgn/Ccl21b/Lep/Adipoq/Dgat2/Scd1/Thrsp/Ccl19/Cidea	9
	GO:0016051	carbohydrate biosynthetic process	7/78	205/28943	1.39316e-06	0.000155338	0.000113653	Rgn/Gys2/Lep/Adipoq/Dgat2/Gpd1/Rbp4	7
	GO:0120161	regulation of cold-induced thermogenesis	6/78	147/28943	2.94493e-06	0.000306469	0.000224228	Lep/Adipoq/Elovl3/Scd1/Cidea/Ucp1	6
	GO:0106106	cold-induced thermogenesis	6/78	149/28943	3.18455e-06	0.000310693	0.000227318	Lep/Adipoq/Elovl3/Scd1/Cidea/Ucp1	6
	GO:0006631	fatty acid metabolic process	9/78	453/28943	3.65322e-06	0.000317853	0.000232557	Rgn/Slc27a2/Pnpla3/Lep/Adipoq/Dgat2/Elovl3/Scd1/Fasn	9
	GO:0006094	gluconeogenesis	5/78	86/28943	3.66519e-06	0.000317853	0.000232557	Lep/Adipoq/Dgat2/Gpd1/Rbp4	5
	GO:0019319	hexose biosynthetic process	5/78	90/28943	4.58664e-06	0.000376829	0.000275707	Lep/Adipoq/Dgat2/Gpd1/Rbp4	5
	GO:0019318	hexose metabolic process	7/78	253/28943	5.59015e-06	0.000426147	0.000311791	Rgn/Aldh1a7/Lep/Adipoq/Dgat2/Gpd1/Rbp4	7
	GO:1990845	adaptive thermogenesis	6/78	165/28943	5.73293e-06	0.000426147	0.000311791	Lep/Adipoq/Elovl3/Scd1/Cidea/Ucp1	6
	GO:0006651	diacylglycerol biosynthetic process	3/78	14/28943	6.70849e-06	0.000473006	0.000346075	Mogat1/Mogat2/Dgat2	3
	GO:0120162	positive regulation of cold-induced thermogenesis	5/78	98/28943	6.96934e-06	0.000473006	0.000346075	Lep/Adipoq/Elovl3/Scd1/Ucp1	5
	GO:0045444	fat cell differentiation	7/78	265/28943	7.56442e-06	0.000492003	0.000359974	Fcor/Lep/Adipoq/Mrap/Scd1/Adig/Ucp1	7
	GO:0005996	monosaccharide metabolic process	7/78	268/28943	8.13942e-06	0.000508226	0.000371843	Rgn/Aldh1a7/Lep/Adipoq/Dgat2/Gpd1/Rbp4	7
	GO:0045834	positive regulation of lipid metabolic process	6/78	188/28943	1.20805e-05	0.000725297	0.000530663	Rgn/Ccl21b/Adipoq/Dgat2/Scd1/Ccl19	6
	GO:0070417	cellular response to cold	3/78	18/28943	1.49224e-05	0.000862735	0.00063122	Fcor/Cidea/Ucp1	3
	GO:0044262	cellular carbohydrate metabolic process	7/78	302/28943	1.76159e-05	0.000982085	0.000718542	Rgn/Mogat1/Mogat2/Gys2/Lep/Adipoq/Dgat2	7
	GO:0045017	glycerolipid biosynthetic process	6/78	214/28943	2.5112e-05	0.00135172	0.000988984	Rgn/Mogat1/Mogat2/Pnpla3/Dgat2/Thrsp	6
	GO:0006006	glucose metabolic process	6/78	217/28943	2.71527e-05	0.00141285	0.00103371	Rgn/Lep/Adipoq/Dgat2/Gpd1/Rbp4	6
	GO:0010876	lipid localization	8/78	470/28943	3.95162e-05	0.00198983	0.00145586	Slc27a2/Pon1/Lep/Adipoq/Cidec/Dgat2/Rbp4/Cidea	8
	GO:0010866	regulation of triglyceride biosynthetic process	3/78	25/28943	4.14928e-05	0.00202407	0.00148091	Rgn/Dgat2/Thrsp	3
	GO:0006066	alcohol metabolic process	7/78	359/28943	5.28784e-05	0.00250131	0.00183008	Mogat1/Mogat2/Pon1/Lep/Dgat2/Gpd1/Rbp4	7
	GO:0046339	diacylglycerol metabolic process	3/78	30/28943	7.25364e-05	0.00333028	0.0024366	Mogat1/Mogat2/Dgat2	3
	GO:0001906	cell killing	6/78	273/28943	9.69554e-05	0.00432421	0.00316381	Ccl21b/Clec12b/H2-M11/Lep/Kng2/Ccl19	6
	GO:0070542	response to fatty acid	3/78	37/28943	0.000136948	0.00593821	0.00434469	Dgat2/Scd1/Ucp1	3
	GO:0006109	regulation of carbohydrate metabolic process	5/78	199/28943	0.000205341	0.00866318	0.00633841	Rgn/Lep/Adipoq/Dgat2/Gpd1	5
	GO:0002021	response to dietary excess	3/78	43/28943	0.000214998	0.00883188	0.00646184	Pnpla3/Lep/Ucp1	3
	GO:0072330	monocarboxylic acid biosynthetic process	5/78	209/28943	0.000257587	0.0101512	0.00742711	Rgn/Slc27a2/Elovl3/Scd1/Fasn	5
	GO:0010906	regulation of glucose metabolic process	4/78	114/28943	0.00026012	0.0101512	0.00742711	Rgn/Lep/Adipoq/Dgat2	4
	GO:0019395	fatty acid oxidation	4/78	118/28943	0.000296715	0.0108332	0.00792612	Slc27a2/Lep/Adipoq/Dgat2	4
	GO:0019751	polyol metabolic process	4/78	118/28943	0.000296715	0.0108332	0.00792612	Mogat1/Mogat2/Lep/Dgat2	4
	GO:0009409	response to cold	3/78	48/28943	0.000298416	0.0108332	0.00792612	Fcor/Cidea/Ucp1	3
	GO:0051235	maintenance of location	6/78	341/28943	0.000322277	0.0114335	0.00836532	Ccl21b/Tmsb15a/Lep/Dgat2/Ccl19/Cidea	6
	GO:0030258	lipid modification	5/78	221/28943	0.000332974	0.0115505	0.00845091	Slc27a2/Lep/Adipoq/Dgat2/Scd1	5
	GO:0090207	regulation of triglyceride metabolic process	3/78	52/28943	0.000378361	0.0126463	0.00925265	Rgn/Dgat2/Thrsp	3
	GO:0034440	lipid oxidation	4/78	126/28943	0.000380766	0.0126463	0.00925265	Slc27a2/Lep/Adipoq/Dgat2	4
	GO:0006111	regulation of gluconeogenesis	3/78	55/28943	0.000446553	0.0145223	0.0106252	Lep/Adipoq/Dgat2	3
	GO:0062012	regulation of small molecule metabolic process	6/78	368/28943	0.000482318	0.0153653	0.011242	Rgn/Lep/Adipoq/Dgat2/Me1/Gpd1	6
	GO:0046462	monoacylglycerol metabolic process	2/78	13/28943	0.000548587	0.0164681	0.0120489	Mogat2/Dgat2	2
	GO:0097048	dendritic cell apoptotic process	2/78	13/28943	0.000548587	0.0164681	0.0120489	Ccl21b/Ccl19	2
	GO:2000668	regulation of dendritic cell apoptotic process	2/78	13/28943	0.000548587	0.0164681	0.0120489	Ccl21b/Ccl19	2
	GO:0032868	response to insulin	5/78	250/28943	0.000583666	0.0171906	0.0125775	Ahsg/Lep/Adipoq/Otop1/Rbp4	5
	GO:0001767	establishment of lymphocyte polarity	2/78	14/28943	0.0006389	0.0181331	0.0132671	Ccl21b/Ccl19	2
	GO:0001768	establishment of T cell polarity	2/78	14/28943	0.0006389	0.0181331	0.0132671	Ccl21b/Ccl19	2
	GO:0006633	fatty acid biosynthetic process	4/78	154/28943	0.000809812	0.0223436	0.0163477	Rgn/Elovl3/Scd1/Fasn	4
	GO:0032102	negative regulation of response to external stimulus	6/78	407/28943	0.000815879	0.0223436	0.0163477	Clec12b/Il22/Lep/Kng2/Adipoq/Otop1	6
	GO:1903624	regulation of DNA catabolic process	2/78	16/28943	0.000839565	0.0225959	0.0165323	Rgn/Cidea	2
	GO:0006869	lipid transport	6/78	419/28943	0.000947909	0.0247324	0.0180955	Slc27a2/Pon1/Lep/Adipoq/Cidec/Rbp4	6
	GO:0002377	immunoglobulin production	5/78	280/28943	0.000970439	0.0247324	0.0180955	Ighe/Igkv9-123/Igkv4-72/Igkv12-98/Rbp4	5
	GO:0032371	regulation of sterol transport	3/78	72/28943	0.000982326	0.0247324	0.0180955	Pon1/Lep/Adipoq	3
	GO:0032374	regulation of cholesterol transport	3/78	72/28943	0.000982326	0.0247324	0.0180955	Pon1/Lep/Adipoq	3
	GO:0010675	regulation of cellular carbohydrate metabolic process	4/78	167/28943	0.00109409	0.027109	0.0198343	Rgn/Lep/Adipoq/Dgat2	4
	GO:0010867	positive regulation of triglyceride biosynthetic process	2/78	19/28943	0.00119013	0.028424	0.0207964	Rgn/Dgat2	2
	GO:0050746	regulation of lipoprotein metabolic process	2/78	19/28943	0.00119013	0.028424	0.0207964	Lep/Dgat2	2
	GO:0015850	organic hydroxy compound transport	5/78	294/28943	0.00120502	0.028424	0.0207964	Chrna4/Pon1/Lep/Adipoq/Rbp4	5
	GO:0062013	positive regulation of small molecule metabolic process	4/78	172/28943	0.00121999	0.028424	0.0207964	Rgn/Adipoq/Dgat2/Gpd1	4
	GO:0006635	fatty acid beta-oxidation	3/78	78/28943	0.00123861	0.0284333	0.0208032	Slc27a2/Lep/Adipoq	3
	GO:0046394	carboxylic acid biosynthetic process	5/78	298/28943	0.00127915	0.0286195	0.0209395	Rgn/Slc27a2/Elovl3/Scd1/Fasn	5
	GO:0016053	organic acid biosynthetic process	5/78	299/28943	0.0012982	0.0286195	0.0209395	Rgn/Slc27a2/Elovl3/Scd1/Fasn	5
	GO:0002407	dendritic cell chemotaxis	2/78	20/28943	0.00132005	0.0286195	0.0209395	Ccl21b/Ccl19	2
	GO:0034695	response to prostaglandin E	2/78	20/28943	0.00132005	0.0286195	0.0209395	Ccl21b/Ccl19	2
	GO:0071356	cellular response to tumor necrosis factor	4/78	183/28943	0.00153211	0.0323481	0.0236675	Ccl21b/Adipoq/Gpd1/Ccl19	4
	GO:0045913	positive regulation of carbohydrate metabolic process	3/78	84/28943	0.00153348	0.0323481	0.0236675	Rgn/Dgat2/Gpd1	3
	GO:0034694	response to prostaglandin	2/78	22/28943	0.00159931	0.0328491	0.024034	Ccl21b/Ccl19	2
	GO:0050872	white fat cell differentiation	2/78	22/28943	0.00159931	0.0328491	0.024034	Scd1/Adig	2
	GO:0032680	regulation of tumor necrosis factor production	4/78	186/28943	0.00162605	0.0329644	0.0241184	Lep/Adipoq/Ccl19/Cidea	4
	GO:1905952	regulation of lipid localization	4/78	187/28943	0.00165823	0.0331858	0.0242804	Pon1/Lep/Adipoq/Cidea	4
	GO:1903555	regulation of tumor necrosis factor superfamily cytokine production	4/78	189/28943	0.00172391	0.0336978	0.024655	Lep/Adipoq/Ccl19/Cidea	4
	GO:0071398	cellular response to fatty acid	2/78	23/28943	0.00174857	0.0336978	0.024655	Dgat2/Ucp1	2
	GO:0140354	lipid import into cell	2/78	23/28943	0.00174857	0.0336978	0.024655	Slc27a2/Rbp4	2
	GO:0032640	tumor necrosis factor production	4/78	193/28943	0.00186067	0.0349703	0.025586	Lep/Adipoq/Ccl19/Cidea	4
	GO:0019915	lipid storage	3/78	90/28943	0.00186895	0.0349703	0.025586	Lep/Dgat2/Cidea	3
	GO:0032515	negative regulation of phosphoprotein phosphatase activity	2/78	24/28943	0.00190421	0.0349703	0.025586	Rgn/Ppp1r1b	2
	GO:0034383	low-density lipoprotein particle clearance	2/78	24/28943	0.00190421	0.0349703	0.025586	Adipoq/Dgat2	2
	GO:0061458	reproductive system development	5/78	328/28943	0.00194733	0.0353119	0.0258359	Spata22/Ahsg/Sox2/Lep/Rbp4	5
	GO:0071706	tumor necrosis factor superfamily cytokine production	4/78	196/28943	0.00196805	0.0353119	0.0258359	Lep/Adipoq/Ccl19/Cidea	4
	GO:0031640	killing of cells of another organism	3/78	94/28943	0.00211608	0.0375363	0.0274635	Ccl21b/Kng2/Ccl19	3
	GO:0034612	response to tumor necrosis factor	4/78	202/28943	0.00219556	0.038475	0.0281503	Ccl21b/Adipoq/Gpd1/Ccl19	4
	GO:0016042	lipid catabolic process	5/78	338/28943	0.00221829	0.038475	0.0281503	Slc27a2/Pnpla3/Lep/Adipoq/Cidea	5
	GO:0046890	regulation of lipid biosynthetic process	4/78	205/28943	0.00231585	0.0397258	0.0290654	Rgn/Lep/Dgat2/Thrsp	4
	GO:0036336	dendritic cell migration	2/78	27/28943	0.00240902	0.0408748	0.029906	Ccl21b/Ccl19	2
	GO:0044282	small molecule catabolic process	5/78	350/28943	0.00257863	0.0425058	0.0310994	Slc27a2/Pon1/Aldh1a7/Lep/Adipoq	5
	GO:0002089	lens morphogenesis in camera-type eye	2/78	28/28943	0.00258981	0.0425058	0.0310994	Sox2/Lctl	2
	GO:0070293	renal absorption	2/78	28/28943	0.00258981	0.0425058	0.0310994	Amn/Adipoq	2
	GO:0032869	cellular response to insulin stimulus	4/78	212/28943	0.00261407	0.0425058	0.0310994	Ahsg/Lep/Adipoq/Otop1	4
	GO:0008202	steroid metabolic process	5/78	354/28943	0.00270767	0.043574	0.0318809	Slc27a2/Pon1/Lep/Dgat2/Scd1	5
	GO:0009062	fatty acid catabolic process	3/78	103/28943	0.00274387	0.0437059	0.0319774	Slc27a2/Lep/Adipoq	3
	GO:0090023	positive regulation of neutrophil chemotaxis	2/78	29/28943	0.0027768	0.0437837	0.0320343	Ccl21b/Ccl19	2
	GO:0019217	regulation of fatty acid metabolic process	3/78	105/28943	0.0028973	0.0452268	0.0330902	Rgn/Adipoq/Dgat2	3
	GO:0035094	response to nicotine	2/78	31/28943	0.00316926	0.0475694	0.0348041	Chrna4/Ppp1r1b	2
	GO:0043552	positive regulation of phosphatidylinositol 3-kinase activity	2/78	31/28943	0.00316926	0.0475694	0.0348041	Ccl21b/Ccl19	2
	GO:0071624	positive regulation of granulocyte chemotaxis	2/78	31/28943	0.00316926	0.0475694	0.0348041	Ccl21b/Ccl19	2
	GO:0090208	positive regulation of triglyceride metabolic process	2/78	31/28943	0.00316926	0.0475694	0.0348041	Rgn/Dgat2	2
	GO:0043255	regulation of carbohydrate biosynthetic process	3/78	109/28943	0.00321977	0.0476193	0.0348406	Lep/Adipoq/Dgat2	3
	GO:0043434	response to peptide hormone	5/78	369/28943	0.00323359	0.0476193	0.0348406	Ahsg/Lep/Adipoq/Otop1/Rbp4	5
	GO:0046395	carboxylic acid catabolic process	4/78	226/28943	0.0032877	0.0477117	0.0349083	Slc27a2/Pon1/Lep/Adipoq	4
	GO:0010875	positive regulation of cholesterol efflux	2/78	32/28943	0.00337466	0.0477117	0.0349083	Pon1/Adipoq	2
	GO:0034389	lipid droplet organization	2/78	32/28943	0.00337466	0.0477117	0.0349083	Pnpla3/Cidec	2
	GO:0016054	organic acid catabolic process	4/78	228/28943	0.0033927	0.0477117	0.0349083	Slc27a2/Pon1/Lep/Adipoq	4
	GO:0044242	cellular lipid catabolic process	4/78	228/28943	0.0033927	0.0477117	0.0349083	Slc27a2/Pnpla3/Lep/Adipoq	4
	GO:0030301	cholesterol transport	3/78	112/28943	0.00347551	0.0480112	0.0351274	Pon1/Lep/Adipoq	3
	GO:0071346	cellular response to interferon-gamma	3/78	112/28943	0.00347551	0.0480112	0.0351274	Ccl21b/Otop1/Ccl19	3
	GO_BP_UP DEGs
	ID	Description	Gene Ratio	Bg Ratio	P value	P_Adj	q value	Gene ID	Count
	GO:0022600	digestive system process	5/80	121/28943	2.19905e-05	0.0153566	0.0136846	Cel/Rsc1a1/Slco1a5/Muc4/Slc5a1	5
	GO:0007586	digestion	5/80	138/28943	4.13367e-05	0.0153566	0.0136846	Cel/Rsc1a1/Slco1a5/Muc4/Slc5a1	5
	GO_CC_DOWN DEGs
	ID	Description	Gene Ratio	Bg Ratio	P value	P_Adj	q value	Gene ID	Count
	GO:0005811	lipid droplet	5/78	109/28804	1.19888e-05	0.000983081	0.000820286	Pnpla3/Cidec/Dgat2/Adig/Cidea	5
	GO:0030176	integral component of endoplasmic reticulum membrane	4/78	157/28804	0.00088572	0.0291113	0.0242906	Slc27a2/Dgat2/Elovl3/Scd1	4
	GO:0031227	intrinsic component of endoplasmic reticulum membrane	4/78	165/28804	0.00106505	0.0291113	0.0242906	Slc27a2/Dgat2/Elovl3/Scd1	4
	GO:0031362	anchored component of external side of plasma membrane	2/78	23/28804	0.00176518	0.0357287	0.0298121	Prn/Igsf21	2
	GO:0097038	perinuclear endoplasmic reticulum	2/78	26/28804	0.00225563	0.0357287	0.0298121	Mogat2/Dgat2	2
	GO:0031233	intrinsic component of external side of plasma membrane	2/78	28/28804	0.00261429	0.0357287	0.0298121	Prn/Igsf21	2
	GO_CC_UP DEGs
	ID	Description	Gene Ratio	Bg Ratio	P value	P_Adj	q value	Gene ID	Count
	GO:0045095	keratin filament	3/84	53/28804	0.000504468	0.0259991	0.0223105	Krt5/Krt18/Krt14	3
	GO:0001533	cornified envelope	3/84	61/28804	0.000762126	0.0259991	0.0223105	Krt5/Krt14/Serpinb5	3
	GO:0005903	brush border	4/84	144/28804	0.000847797	0.0259991	0.0223105	Rsc1a1/Slco1a5/Slc5a1/Slc34a2	4
	GO:0031526	brush border membrane	3/84	79/28804	0.0016126	0.0370898	0.0318276	Slco1a5/Slc5a1/Slc34a2	3
	GO:0031528	microvillus membrane	2/84	23/28804	0.00204314	0.0375937	0.0322601	Muc4/Slc34a2	2
	GO:0098862	cluster of actin-based cell projections	4/84	205/28804	0.00308369	0.0472833	0.0405749	Rsc1a1/Slco1a5/Slc5a1/Slc34a2	4
	GO:0005902	microvillus	3/84	105/28804	0.00362058	0.0475848	0.0408336	Muc4/Prom2/Slc34a2	3
	GO_MF_DOWN DEGs
	ID	Description	Gene Ratio	Bg Ratio	P value	P_Adj	q value	Gene ID	Count
	GO:0016411	acylglycerol O-acyltransferase activity	4/72	19/28404	1.42893e-07	3.01503e-05	2.21107e-05	Mogat1/Mogat2/Pnpla3/Dgat2	4
	GO:0016747	acyltransferase activity, transferring groups other than amino-acyl groups	7/72	225/28404	1.69616e-06	0.000178945	0.00013123	Mogat1/Mogat2/Pnpla3/Fcor/Dgat2/Elovl3/Fasn	7
	GO:0016746	acyltransferase activity	7/72	254/28404	3.7801e-06	0.000265867	0.000194974	Mogat1/Mogat2/Pnpla3/Fcor/Dgat2/Elovl3/Fasn	7
	GO:0008374	O-acyltransferase activity	4/72	51/28404	8.66539e-06	0.000457099	0.000335214	Mogat1/Mogat2/Pnpla3/Dgat2	4
	GO:0004312	fatty acid synthase activity	2/72	12/28404	0.000411391	0.0173607	0.0127315	Elovl3/Fasn	2
	GO:0016616	oxidoreductase activity, acting on the CH-OH group of donors, NAD or NADP as acceptor	4/72	153/28404	0.000626496	0.0220318	0.016157	Akr1b7/Me1/Gpd1/Fasn	4
	GO:0016614	oxidoreductase activity, acting on CH-OH group of donors	4/72	161/28404	0.000758069	0.0228504	0.0167573	Akr1b7/Me1/Gpd1/Fasn	4
	GO_MF_UP DEGs
	ID	Description	Gene Ratio	Bg Ratio	P value	P_Adj	q value	Gene ID	Count
	GO:0015291	secondary active transmembrane transporter activity	5/78	247/28404	0.000601326	0.0388438	0.0293411	Slc5a5/Slco1a5/Gm6614/Slc5a1/Slc34a2	5
	GO:0022853	active ion transmembrane transporter activity	5/78	252/28404	0.000658211	0.0388438	0.0293411	Slc5a5/Slco1a5/Gm6614/Slc5a1/Slc34a2	5
	GO:0008401	retinoic acid 4-hydroxylase activity	2/78	15/28404	0.000763769	0.0388438	0.0293411	Cyp3a57/Cyp2w1	2
	GO:0022804	active transmembrane transporter activity	6/78	403/28404	0.000854	0.0388438	0.0293411	Slc5a5/Slco1a5/Gm6614/Slc5a1/Slc34a2/Abca15	6
	GO:0015370	solute:sodium symporter activity	3/78	69/28404	0.00091613	0.0388438	0.0293411	Slc5a5/Slc5a1/Slc34a2	3
	GO:0008395	steroid hydroxylase activity	3/78	73/28404	0.00107899	0.0388438	0.0293411	Cyp3a57/Cyp2w1/Cyp2d10	3
	Reactome_DOWN DEGs
	ID	Description	Gene Ratio	Bg Ratio	P value	P_Adj	q value	Gene ID	Count
	R-MMU-75105	Fatty acyl-CoA biosynthesis	4/32	33/8501	6.26835e-06	0.000789812	0.000554254	Slc27a2/Elovl3/Scd1/Fasn	4
	R-MMU-75109	Triglyceride biosynthesis	3/32	13/8501	1.35088e-05	0.000851054	0.000597231	Mogat1/Mogat2/Dgat2	3
	R-MMU-8978868	Fatty acid metabolism	6/32	163/8501	2.71715e-05	0.0011412	0.000800844	Slc27a2/Pon1/Elovl3/Scd1/Fasn/Thrsp	6
	R-MMU-8979227	Triglyceride metabolism	3/32	24/8501	9.29464e-05	0.00292781	0.0020546	Mogat1/Mogat2/Dgat2	3
	R-MMU-190322	FGFR4 ligand binding and activation	2/32	14/8501	0.00121451	0.0293593	0.0206031	Fgf17/Klb	2
	R-MMU-5654228	Phospholipase C-mediated cascade; FGFR4	2/32	15/8501	0.00139806	0.0293593	0.0206031	Fgf17/Klb	2
	R-MMU-5654719	SHC-mediated cascade:FGFR4	2/32	19/8501	0.00225556	0.0385981	0.0270864	Fgf17/Klb	2
	R-MMU-5654720	PI-3K cascade:FGFR4	2/32	20/8501	0.0025003	0.0385981	0.0270864	Fgf17/Klb	2
	R-MMU-5654712	FRS-mediated FGFR4 signaling	2/32	21/8501	0.00275701	0.0385981	0.0270864	Fgf17/Klb	2
	R-MMU-5654716	Downstream signaling of activated FGFR4	2/32	26/8501	0.00421705	0.0531348	0.0372876	Fgf17/Klb	2
	R-MMU-5654733	Negative regulation of FGFR4 signaling	2/32	31/8501	0.00596335	0.0683074	0.047935	Fgf17/Klb	2
	R-MMU-1483206	Glycerophospholipid biosynthesis	3/32	115/8501	0.00899142	0.0903951	0.0634352	Pnpla3/Dgat2/Gpd1	3
	R-MMU-5654743	Signaling by FGFR4	2/32	40/8501	0.00979461	0.0903951	0.0634352	Fgf17/Klb	2
	R-MMU-109704	PI3K Cascade	2/32	41/8501	0.0102729	0.0903951	0.0634352	Fgf17/Klb	2
	R-MMU-112399	IRS-mediated signalling	2/32	42/8501	0.0107613	0.0903951	0.0634352	Fgf17/Klb	2
	R-MMU-2428928	IRS-related events triggered by IGF1R	2/32	46/8501	0.0128158	0.0921945	0.0646979	Fgf17/Klb	2
	R-MMU-2428924	IGF1R signaling cascade	2/32	47/8501	0.0133542	0.0921945	0.0646979	Fgf17/Klb	2
	R-MMU-2404192	Signaling by Type 1 Insulin-like Growth Factor 1 Receptor (IGF1R)	2/32	48/8501	0.0139023	0.0921945	0.0646979	Fgf17/Klb	2
	R-MMU-74751	Insulin receptor signalling cascade	2/32	48/8501	0.0139023	0.0921945	0.0646979	Fgf17/Klb	2
	Reactome_UP DEGs
	ID	Description	Gene Ratio	Bg Ratio	P value	P_Adj	q value	Gene ID	Count
	R-MMU-977068	Termination of O-glycan biosynthesis	2/26	15/8501	0.000921689	0.0291018	0.0225984	Muc15/Muc4	2
	R-MMU-6805567	Keratinization	4/26	147/8501	0.000954156	0.0291018	0.0225984	Krt5/Krt18/Krt14/Gm10318	4
	R-MMU-6809371	Formation of the cornified envelope	3/26	80/8501	0.00178522	0.0340926	0.026474	Krt5/Krt18/Krt14	3
	R-MMU-8963743	Digestion and absorption	2/26	24/8501	0.00238209	0.0340926	0.026474	Cel/Slc5a1	2
	R-MMU-211981	Xenobiotics	2/26	26/8501	0.00279448	0.0340926	0.026474	Cyp3a57/Cyp2w1	2
	WikiPathways_DOWN DEGs
	ID	Description	Gene Ratio	Bg Ratio	P value	P_Adj	q value	Gene ID	Count
	WP386	Triacylglyceride synthesis	4/22	23/4560	3.38995e-06	9.15285e-05	6.42306e-05	Mogat1 (68393), Mogat2 (233549), Dgat2 (67800), Gpd1 (14555)	4
	WP4491	Elongation of (very) long chain fatty acids	3/22	14/4560	3.4293e-05	0.00031006	0.000217586	Elovl3 (12686), Scd1 (20249), Fasn (14104)	3
	WP2316	PPAR signaling pathway	5/22	82/4560	3.44512e-05	0.00031006	0.000217586	Slc27a2 (26458), Adipoq (11450), Me1 (17436), Scd1 (20249), Ucp1 (22227)	5
	WP447	Adipogenesis genes	5/22	134/4560	0.000357937	0.00241607	0.00169549	Pnpla3 (116939), Lep (16846), Adipoq (11450), Scd1 (20249), Ucp1 (22227)	5
	WP683	Leptin and adiponectin	2/22	10/4560	0.000976898	0.00527525	0.00370193	Lep (16846), Adipoq (11450)	2
	WP4346	Cholesterol metabolism with Bloch and Kandutsch-Russell pathways	3/22	52/4560	0.0018487	0.0075312	0.00528505	Elovl3 (12686), Scd1 (20249), Fasn (14104)	3
	WP4351	Omega-9 fatty acid synthesis	2/22	14/4560	0.00195253	0.0075312	0.00528505	Elovl3 (12686), Fasn (14104)	2
	WP336	Fatty acid biosynthesis	2/22	22/4560	0.00484199	0.015863	0.011132	Scd1 (20249), Fasn (14104)	2
	WP4345	Glycerolipids and glycerophospholipids	2/22	23/4560	0.00528768	0.015863	0.011132	Pnpla3 (116939), Dgat2 (67800)	2
	WikiPathways_UP DEGs
	ID	Description	Gene Ratio	Bg Ratio	P value	P_Adj	q value	Gene ID	Count
	WP1251	Metapathway biotransformation	3/12	141/4560	0.00518663	0.0674262	0.0655153	Cyp2w1 (545817), Hs3st6 (328779), Nat8 (68396)	3
