# Supplementary material for: Cabergoline as a Novel Strategy for Post-Pregnancy Breast Cancer Prevention in Mice and Human
Source: Research Square preprint supplement (doi:10.21203/rs.3.rs-3854490/v1), 2024-02-05
Supplement: Supplementary file 17 [file ec62c3bc609a3f1fb61535f9.xlsx]

## Sheet: Supplementary Table S7
	GO_BP_DOWN DEGs
	ID	Description	Gene Ratio	Bg Ratio	P value	P Adj	q value	Gene ID	Count
	GO:0043588	skin development	46/627	323/28943	3.51397e-24	1.32336e-20	1.08748e-20	Krt77/Krt27/Sox21/Krt78/Krt16/Krt75/Cdsn/Slitrk5/Krt88/Krt4/Foxq1/Ovol1/Etv4/Krt6a/Cers3/Cdh3/Evpl/Barx2/Met/Ovol2/Grhl1/Reg3g/Tfap2a/Edar/Irf6/Tfap2c/Kdf1/Fermt1/Krt79/Prss8/Tmprss13/Trp63/Grhl2/Tfap2b/Dsp/Sprr1a/Trps1/Vdr/Sox9/Krt7/Fgfr2/Krt17/Cldn4/Krt5/Krt14/Krt8	46
	GO:0045104	intermediate filament cytoskeleton organization	26/627	93/28943	6.49837e-22	1.1051e-18	9.0812e-19	Krt77/Krt27/Krt31/Krt78/Krt32/Krt16/Krt75/Krt88/Krt4/Krt42/Krt6a/Evpl/Fam83h/Krt15/Krt79/Krt23/Dsp/Eppk1/Krt7/Pkp1/Krt17/Krt19/Krt5/Krt14/Krt8/Krt18	26
	GO:0045103	intermediate filament-based process	26/627	94/28943	8.8032e-22	1.1051e-18	9.0812e-19	Krt77/Krt27/Krt31/Krt78/Krt32/Krt16/Krt75/Krt88/Krt4/Krt42/Krt6a/Evpl/Fam83h/Krt15/Krt79/Krt23/Dsp/Eppk1/Krt7/Pkp1/Krt17/Krt19/Krt5/Krt14/Krt8/Krt18	26
	GO:0045109	intermediate filament organization	23/627	74/28943	1.03923e-20	9.78438e-18	8.04038e-18	Krt77/Krt27/Krt31/Krt78/Krt32/Krt16/Krt75/Krt88/Krt4/Krt42/Krt6a/Krt15/Krt79/Krt23/Dsp/Eppk1/Krt7/Pkp1/Krt17/Krt19/Krt5/Krt14/Krt8	23
	GO:0008544	epidermis development	44/627	367/28943	3.66614e-20	2.76134e-17	2.26915e-17	Krt77/Krt27/Sox21/Krt78/Krt16/Krt75/Cdsn/Krt88/Krt4/Spink5/Foxq1/Ovol1/Etv4/Krt6a/Cers3/Cdh3/Evpl/Barx2/Ovol2/Grhl1/Reg3g/Tfap2a/Edar/Irf6/Tfap2c/Kdf1/Fermt1/Krt79/Prss8/Trp63/Grhl2/Dsp/Sprr1a/Trps1/Vdr/Sox9/Krt7/Spint1/Fgfr2/Krt17/Esrp1/Krt5/Krt14/Krt8	44
	GO:0030216	keratinocyte differentiation	30/627	156/28943	5.51311e-20	3.46039e-17	2.8436e-17	Krt77/Krt78/Krt16/Krt75/Cdsn/Krt88/Krt4/Etv4/Krt6a/Cers3/Cdh3/Evpl/Ovol2/Grhl1/Reg3g/Tfap2a/Irf6/Tfap2c/Kdf1/Krt79/Trp63/Grhl2/Dsp/Sprr1a/Vdr/Krt7/Krt17/Krt5/Krt14/Krt8	30
	GO:0006959	humoral immune response	46/627	425/28943	3.20349e-19	1.72348e-16	1.41628e-16	Fga/C9/Wfdc5/Ifna2/Pglyrp3/Ang4/Pglyrp4/Spink5/Wfdc21/Ighv5-9-1/Ighv5-12/Krt6a/Hc/Ighv1-7/Ighv6-6/Foxj1/Ighv1-75/Evpl/Dmbt1/A2m/Ighv14-2/Reg3g/Sftpd/Fgb/Ighv1-64/Ighv14-1/Ighv3-6/Ighv9-3/Ighv6-3/Ighv1-12/Cxcl15/Ltf/Ighv1-53/Ighv1-63/Wap/Ighv1-50/Ighg1/Ighv1-11/Ighg2c/Slpi/Ighv1-52/Ighv1-61/Defb1/Trf/Wfdc2/Wfdc18	46
	GO:0009913	epidermal cell differentiation	33/627	242/28943	4.14568e-17	1.95158e-14	1.60372e-14	Krt77/Krt78/Krt16/Krt75/Cdsn/Krt88/Krt4/Spink5/Ovol1/Etv4/Krt6a/Cers3/Cdh3/Evpl/Ovol2/Grhl1/Reg3g/Tfap2a/Irf6/Tfap2c/Kdf1/Krt79/Trp63/Grhl2/Dsp/Sprr1a/Vdr/Krt7/Krt17/Esrp1/Krt5/Krt14/Krt8	33
	GO:0031424	keratinization	17/627	63/28943	1.6531e-14	6.91732e-12	5.68436e-12	Krt77/Krt78/Krt16/Krt75/Cdsn/Krt88/Krt4/Krt6a/Cers3/Cdh3/Evpl/Krt79/Sprr1a/Krt7/Krt17/Krt5/Krt8	17
	GO:0050891	multicellular organismal water homeostasis	16/627	67/28943	7.86974e-13	2.96374e-10	2.43548e-10	Umod/Krt16/Aqp6/Scnn1g/Aqp2/Met/Grhl1/Scnn1b/Scnn1a/Kdf1/Tmprss13/Trp63/Tfap2b/Cdh1/Atp6v1b1/Cldn4	16
	GO:0050878	regulation of body fluid levels	34/627	381/28943	4.06091e-12	1.34451e-09	1.10486e-09	Fga/C9/Umod/Krt16/Aqp6/Clcnka/Proc/Scnn1g/Aqp2/Erbb4/Atp7b/Met/Grhl1/Fgb/Scnn1b/Scnn1a/Kdf1/Anxa8/Tmprss13/Fgg/Cel/Mmp13/Trp63/Tfap2b/Cdh1/Csn3/Tph1/Vdr/Celsr2/Prlr/Atp6v1b1/Aqp5/Cldn4/Csn2	34
	GO:0022612	gland morphogenesis	22/627	157/28943	4.28416e-12	1.34451e-09	1.10486e-09	Nkx2-3/Etv4/Hpn/Hgf/Met/Slit2/Edar/Tfap2c/Tnc/Trp63/Cdh1/Vdr/Sox9/Lama1/Pgr/Esrp2/Serpinb5/Ptn/Fgfr2/Foxa1/Elf3/Esrp1	22
	GO:0030104	water homeostasis	16/627	75/28943	5.10084e-12	1.39279e-09	1.14454e-09	Umod/Krt16/Aqp6/Scnn1g/Aqp2/Met/Grhl1/Scnn1b/Scnn1a/Kdf1/Tmprss13/Trp63/Tfap2b/Cdh1/Atp6v1b1/Cldn4	16
	GO:0030198	extracellular matrix organization	31/627	322/28943	5.17767e-12	1.39279e-09	1.14454e-09	Matn3/Lamb3/Ibsp/Hpse2/Hpn/Tnfrsf11b/Tfap2a/Cyp1b1/Adamts3/Fermt1/Mmp13/Acan/Col4a5/Meltf/Postn/Col16a1/Mia/Col17a1/Col8a2/Col9a1/Col4a6/Sox9/Spint1/Lama1/Serpinb5/Col9a3/Lmx1b/Col9a2/Elf3/Col11a1/Col2a1	31
	GO:0043062	extracellular structure organization	31/627	323/28943	5.61267e-12	1.40915e-09	1.15798e-09	Matn3/Lamb3/Ibsp/Hpse2/Hpn/Tnfrsf11b/Tfap2a/Cyp1b1/Adamts3/Fermt1/Mmp13/Acan/Col4a5/Meltf/Postn/Col16a1/Mia/Col17a1/Col8a2/Col9a1/Col4a6/Sox9/Spint1/Lama1/Serpinb5/Col9a3/Lmx1b/Col9a2/Elf3/Col11a1/Col2a1	31
	GO:0045229	external encapsulating structure organization	31/627	324/28943	6.08222e-12	1.4316e-09	1.17643e-09	Matn3/Lamb3/Ibsp/Hpse2/Hpn/Tnfrsf11b/Tfap2a/Cyp1b1/Adamts3/Fermt1/Mmp13/Acan/Col4a5/Meltf/Postn/Col16a1/Mia/Col17a1/Col8a2/Col9a1/Col4a6/Sox9/Spint1/Lama1/Serpinb5/Col9a3/Lmx1b/Col9a2/Elf3/Col11a1/Col2a1	31
	GO:0019730	antimicrobial humoral response	23/627	177/28943	6.89371e-12	1.52716e-09	1.25495e-09	Fga/Wfdc5/Pglyrp3/Ang4/Pglyrp4/Spink5/Wfdc21/Krt6a/Evpl/Dmbt1/Reg3g/Sftpd/Fgb/Cxcl15/Ltf/Wap/Ighg1/Ighg2c/Slpi/Defb1/Trf/Wfdc2/Wfdc18	23
	GO:0019731	antibacterial humoral response	18/627	105/28943	1.20728e-11	2.5259e-09	2.07568e-09	Fga/Wfdc5/Ang4/Spink5/Wfdc21/Evpl/Dmbt1/Sftpd/Fgb/Ltf/Wap/Ighg1/Ighg2c/Slpi/Defb1/Trf/Wfdc2/Wfdc18	18
	GO:0002455	humoral immune response mediated by circulating immunoglobulin	23/627	183/28943	1.38372e-11	2.74268e-09	2.25381e-09	C9/Ighv5-9-1/Ighv5-12/Hc/Ighv1-7/Ighv6-6/Foxj1/Ighv1-75/Ighv14-2/Ighv1-64/Ighv14-1/Ighv3-6/Ighv9-3/Ighv6-3/Ighv1-12/Ighv1-53/Ighv1-63/Ighv1-50/Ighg1/Ighv1-11/Ighg2c/Ighv1-52/Ighv1-61	23
	GO:0006958	complement activation, classical pathway	22/627	167/28943	1.50043e-11	2.82531e-09	2.32172e-09	C9/Ighv5-9-1/Ighv5-12/Hc/Ighv1-7/Ighv6-6/Ighv1-75/Ighv14-2/Ighv1-64/Ighv14-1/Ighv3-6/Ighv9-3/Ighv6-3/Ighv1-12/Ighv1-53/Ighv1-63/Ighv1-50/Ighg1/Ighv1-11/Ighg2c/Ighv1-52/Ighv1-61	22
	GO:0006956	complement activation	23/627	193/28943	4.15565e-11	7.45246e-09	6.12411e-09	C9/Ighv5-9-1/Ighv5-12/Hc/Ighv1-7/Ighv6-6/Ighv1-75/A2m/Ighv14-2/Ighv1-64/Ighv14-1/Ighv3-6/Ighv9-3/Ighv6-3/Ighv1-12/Ighv1-53/Ighv1-63/Ighv1-50/Ighg1/Ighv1-11/Ighg2c/Ighv1-52/Ighv1-61	23
	GO:0045216	cell-cell junction organization	24/627	219/28943	9.24625e-11	1.58279e-08	1.30067e-08	Arvcf/Cldn22/Cdh18/Cldn23/Pof1b/Irx3/Grhl1/Gjb6/Ildr1/Gjb2/Abcc8/Cldn8/Cgn/Cldn6/Perp/Grhl2/Cxadr/Dsp/Cdh1/Marveld3/Pkp1/Cldn7/Cldn4/Cldn3	24
	GO:0006910	phagocytosis, recognition	21/627	170/28943	1.48547e-10	2.4323e-08	1.99876e-08	Ighv5-9-1/Ighv5-12/Ighv1-7/Ighv6-6/Ighv1-75/Ighv14-2/Sftpd/Ighv1-64/Ighv14-1/Ighv3-6/Ighv9-3/Ighv6-3/Ighv1-12/Ighv1-53/Ighv1-63/Ighv1-50/Ighg1/Ighv1-11/Ighg2c/Ighv1-52/Ighv1-61	21
	GO:0048732	gland development	36/627	483/28943	1.60962e-10	2.46985e-08	2.02961e-08	Nkx2-3/Foxa3/Proc/Etv4/Erbb4/Atp7b/Stra6/Hpn/Hgf/Met/Slit2/Edar/Irf6/Tfap2c/Tnc/Atp2c2/Trp63/Cdh1/Csn3/Tfcp2l1/Hp/Tph1/Vdr/Sox9/Elf5/Lama1/Pgr/Esrp2/Serpinb5/Ptn/Prlr/Fgfr2/Foxa1/Elf3/Esrp1/Csn2	36
	GO:0001655	urogenital system development	32/627	391/28943	1.63957e-10	2.46985e-08	2.02961e-08	Umod/Wnt9b/Slc12a1/Clcnka/Ovol1/Hc/Aqp2/Erbb4/Kif26b/Stra6/Irx3/Arg2/Slit2/Tfap2a/Tnc/Wnt7b/Slc5a1/Trp63/Tfap2b/Sox9/Ptk7/Spp1/Tacstd2/Serpinb5/Irx1/Cited1/Prlr/Fgfr2/Foxa1/Epcam/Irx2/Upk3a	32
	GO:0007162	negative regulation of cell adhesion	28/627	313/28943	3.07633e-10	4.45595e-08	3.66171e-08	Pla2g2f/Cdsn/Nat8f5/Btn2a2/Ptprz1/Foxj1/Arg1/Arg2/Sftpd/Nat8f2/Ido1/Cyp1b1/Tnc/Nat8/Fgg/Muc1/Muc4/Meltf/Efna5/Postn/Cdh1/Vtcn1/Plet1/Tacstd2/Btn1a1/Epcam/Lgals7/Cldn7	28
	GO:0007043	cell-cell junction assembly	19/627	158/28943	1.76121e-09	2.45656e-07	2.0187e-07	Arvcf/Cldn22/Cdh18/Cldn23/Pof1b/Irx3/Gjb6/Ildr1/Gjb2/Cldn8/Cgn/Cldn6/Grhl2/Cdh1/Marveld3/Pkp1/Cldn7/Cldn4/Cldn3	19
	GO:0001523	retinoid metabolic process	13/627	69/28943	2.60185e-09	3.49949e-07	2.87573e-07	Cyp2c55/Adh6a/Cyp2d12/Cyp2d34/Cyp2d11/Cyp26a1/Crabp1/Cyp2d9/Rbp1/Cyp1b1/Crabp2/Cyp2d10/Plb1	13
	GO:0008037	cell recognition	26/627	302/28943	2.98766e-09	3.87983e-07	3.18828e-07	Adam18/Fezf2/Cntn5/Crisp4/Ighv5-9-1/Ighv5-12/Ptprz1/Ighv1-7/Ighv6-6/Ighv1-75/Ighv14-2/Sftpd/Ighv1-64/Ighv14-1/Ighv3-6/Ighv9-3/Ighv6-3/Ighv1-12/Ighv1-53/Ighv1-63/Ighv1-50/Ighg1/Ighv1-11/Ighg2c/Ighv1-52/Ighv1-61	26
	GO:0050853	B cell receptor signaling pathway	20/627	182/28943	3.24186e-09	4.06961e-07	3.34423e-07	Ighv5-9-1/Ighv5-12/Ighv1-7/Ighv6-6/Ighv1-75/Ighv14-2/Ighv1-64/Ighv14-1/Ighv3-6/Ighv9-3/Ighv6-3/Ighv1-12/Ighv1-53/Ighv1-63/Ighv1-50/Ighg1/Ighv1-11/Ighg2c/Ighv1-52/Ighv1-61	20
	GO:0050678	regulation of epithelial cell proliferation	32/627	442/28943	3.44727e-09	4.18788e-07	3.44142e-07	Nkx2-3/Ang4/Fut1/Bnc1/Gdf5/Muc16/Krt4/Ovol1/Etv4/Erbb4/Cdh3/Hpn/Arg1/Ovol2/Reg3g/Irf6/Kdf1/Trp63/Cxadr/Eppk1/Cdh1/Vdr/Sox9/Marveld3/Tacstd2/Pgr/Esrp2/Serpinb5/Ptn/Cnmd/Fgfr2/Esrp1	32
	GO:0016101	diterpenoid metabolic process	13/627	71/28943	3.75945e-09	4.4244e-07	3.63578e-07	Cyp2c55/Adh6a/Cyp2d12/Cyp2d34/Cyp2d11/Cyp26a1/Crabp1/Cyp2d9/Rbp1/Cyp1b1/Crabp2/Cyp2d10/Plb1	13
	GO:0001822	kidney development	27/627	334/28943	5.78674e-09	6.60389e-07	5.4268e-07	Umod/Wnt9b/Slc12a1/Clcnka/Ovol1/Hc/Aqp2/Erbb4/Kif26b/Stra6/Irx3/Arg2/Slit2/Tfap2a/Wnt7b/Slc5a1/Tfap2b/Sox9/Ptk7/Spp1/Tacstd2/Irx1/Cited1/Fgfr2/Epcam/Irx2/Upk3a	27
	GO:0001656	metanephros development	14/627	91/28943	1.00069e-08	1.10841e-06	9.10847e-07	Umod/Wnt9b/Aqp2/Kif26b/Irx3/Slit2/Tfap2a/Wnt7b/Slc5a1/Tfap2b/Sox9/Irx1/Cited1/Irx2	14
	GO:0006721	terpenoid metabolic process	13/627	78/28943	1.24193e-08	1.33632e-06	1.09813e-06	Cyp2c55/Adh6a/Cyp2d12/Cyp2d34/Cyp2d11/Cyp26a1/Crabp1/Cyp2d9/Rbp1/Cyp1b1/Crabp2/Cyp2d10/Plb1	13
	GO:0072001	renal system development	27/627	348/28943	1.38166e-08	1.44537e-06	1.18774e-06	Umod/Wnt9b/Slc12a1/Clcnka/Ovol1/Hc/Aqp2/Erbb4/Kif26b/Stra6/Irx3/Arg2/Slit2/Tfap2a/Wnt7b/Slc5a1/Tfap2b/Sox9/Ptk7/Spp1/Tacstd2/Irx1/Cited1/Fgfr2/Epcam/Irx2/Upk3a	27
	GO:0120193	tight junction organization	14/627	94/28943	1.53815e-08	1.56559e-06	1.28653e-06	Cldn22/Cldn23/Pof1b/Ildr1/Abcc8/Cldn8/Cgn/Cldn6/Grhl2/Cdh1/Marveld3/Cldn7/Cldn4/Cldn3	14
	GO:0006911	phagocytosis, engulfment	20/627	201/28943	1.79197e-08	1.77594e-06	1.45939e-06	Ighv5-9-1/Ighv5-12/Ighv1-7/Ighv6-6/Ighv1-75/Ighv14-2/Ighv1-64/Ighv14-1/Ighv3-6/Ighv9-3/Ighv6-3/Ighv1-12/Ighv1-53/Ighv1-63/Ighv1-50/Ighg1/Ighv1-11/Ighg2c/Ighv1-52/Ighv1-61	20
	GO:0002064	epithelial cell development	22/627	245/28943	2.29781e-08	2.21886e-06	1.82336e-06	Cdsn/Proc/Spdef/Pof1b/Met/Tfap2a/Tfap2c/Kdf1/Cgn/Map7/Trp63/Grhl2/Shroom3/Cdh1/Tfcp2l1/Sox9/Pgr/Rab25/Cnmd/Fgfr2/Foxa1/Cldn3	22
	GO:0030856	regulation of epithelial cell differentiation	18/627	168/28943	2.93758e-08	2.76573e-06	2.27276e-06	Wnt9b/Foxa3/Proc/Etv4/Foxj1/Dmbt1/Ovol2/Grhl1/Reg3g/Kdf1/Trp63/Grhl2/Eppk1/Vdr/Sox9/Cited1/Prlr/Esrp1	18
	GO:0099024	plasma membrane invagination	20/627	210/28943	3.74978e-08	3.44431e-06	2.83039e-06	Ighv5-9-1/Ighv5-12/Ighv1-7/Ighv6-6/Ighv1-75/Ighv14-2/Ighv1-64/Ighv14-1/Ighv3-6/Ighv9-3/Ighv6-3/Ighv1-12/Ighv1-53/Ighv1-63/Ighv1-50/Ighg1/Ighv1-11/Ighg2c/Ighv1-52/Ighv1-61	20
	GO:0043616	keratinocyte proliferation	11/627	59/28943	4.92796e-08	4.37457e-06	3.59483e-06	Ovol1/Cdh3/Ovol2/Reg3g/Irf6/Kdf1/Fermt1/Trp63/Eppk1/Vdr/Fgfr2	11
	GO:0042303	molting cycle	16/627	137/28943	5.11102e-08	4.37457e-06	3.59483e-06	Krt27/Sox21/Krt16/Foxq1/Cdh3/Barx2/Edar/Tfap2c/Fermt1/Prss8/Trp63/Trps1/Sox9/Fgfr2/Krt17/Krt14	16
	GO:0042633	hair cycle	16/627	137/28943	5.11102e-08	4.37457e-06	3.59483e-06	Krt27/Sox21/Krt16/Foxq1/Cdh3/Barx2/Edar/Tfap2c/Fermt1/Prss8/Trp63/Trps1/Sox9/Fgfr2/Krt17/Krt14	16
	GO:0034329	cell junction assembly	30/627	445/28943	5.26454e-08	4.37736e-06	3.59712e-06	Arvcf/Cldn22/Cntn5/Cdh18/Slitrk5/Cldn23/Erbb4/Pof1b/Irx3/Gjb6/Rab17/Ildr1/Gjb2/Sptbn2/Cldn8/Cgn/Cldn6/Efna5/Col16a1/Grhl2/Col17a1/Cdh1/Oxtr/Marveld3/Nrxn3/Shank2/Pkp1/Cldn7/Cldn4/Cldn3	30
	GO:0098773	skin epidermis development	15/627	120/28943	5.34675e-08	4.37736e-06	3.59712e-06	Krt27/Sox21/Foxq1/Cdh3/Barx2/Edar/Tfap2c/Kdf1/Fermt1/Prss8/Trp63/Trps1/Sox9/Fgfr2/Krt17	15
	GO:0120192	tight junction assembly	13/627	88/28943	5.54819e-08	4.44563e-06	3.65323e-06	Cldn22/Cldn23/Pof1b/Ildr1/Cldn8/Cgn/Cldn6/Grhl2/Cdh1/Marveld3/Cldn7/Cldn4/Cldn3	13
	GO:0010324	membrane invagination	20/627	218/28943	6.98682e-08	5.48174e-06	4.50466e-06	Ighv5-9-1/Ighv5-12/Ighv1-7/Ighv6-6/Ighv1-75/Ighv14-2/Ighv1-64/Ighv14-1/Ighv3-6/Ighv9-3/Ighv6-3/Ighv1-12/Ighv1-53/Ighv1-63/Ighv1-50/Ighg1/Ighv1-11/Ighg2c/Ighv1-52/Ighv1-61	20
	GO:0050851	antigen receptor-mediated signaling pathway	24/627	307/28943	7.62745e-08	5.86224e-06	4.81734e-06	Themis3/Btn2a2/Ighv5-9-1/Ighv5-12/Ighv1-7/Ighv6-6/Ighv1-75/Ighv14-2/Ighv1-64/Ighv14-1/Ighv3-6/Ighv9-3/Ighv6-3/Ighv1-12/Ighv1-53/Ighv1-63/Ighv1-50/Ighg1/Ighv1-11/Ighg2c/Ighv1-52/Ighv1-61/Vtcn1/Btn1a1	24
	GO:0010837	regulation of keratinocyte proliferation	10/627	49/28943	8.14042e-08	6.13136e-06	5.03849e-06	Ovol1/Cdh3/Ovol2/Reg3g/Irf6/Kdf1/Trp63/Eppk1/Vdr/Fgfr2	10
	GO:0016064	immunoglobulin mediated immune response	23/627	286/28943	8.52231e-08	6.29314e-06	5.17143e-06	C9/Ighv5-9-1/Ighv5-12/Hc/Ighv1-7/Ighv6-6/Foxj1/Ighv1-75/Ighv14-2/Ighv1-64/Ighv14-1/Ighv3-6/Ighv9-3/Ighv6-3/Ighv1-12/Ighv1-53/Ighv1-63/Ighv1-50/Ighg1/Ighv1-11/Ighg2c/Ighv1-52/Ighv1-61	23
	GO:0050871	positive regulation of B cell activation	20/627	222/28943	9.43089e-08	6.83014e-06	5.61272e-06	Ighv5-9-1/Ighv5-12/Ighv1-7/Ighv6-6/Ighv1-75/Ighv14-2/Ighv1-64/Ighv14-1/Ighv3-6/Ighv9-3/Ighv6-3/Ighv1-12/Ighv1-53/Ighv1-63/Ighv1-50/Ighg1/Ighv1-11/Ighg2c/Ighv1-52/Ighv1-61	20
	GO:0019724	B cell mediated immunity	23/627	289/28943	1.02977e-07	7.31718e-06	6.01294e-06	C9/Ighv5-9-1/Ighv5-12/Hc/Ighv1-7/Ighv6-6/Foxj1/Ighv1-75/Ighv14-2/Ighv1-64/Ighv14-1/Ighv3-6/Ighv9-3/Ighv6-3/Ighv1-12/Ighv1-53/Ighv1-63/Ighv1-50/Ighg1/Ighv1-11/Ighg2c/Ighv1-52/Ighv1-61	23
	GO:0002768	immune response-regulating cell surface receptor signaling pathway	26/627	360/28943	1.07059e-07	7.46637e-06	6.13554e-06	Themis3/Btn2a2/Ighv5-9-1/Ighv5-12/Ighv1-7/Ighv6-6/Ighv1-75/Ighv14-2/Ighv1-64/Ighv14-1/Ighv3-6/Ighv9-3/Ighv6-3/Ighv1-12/Kit/Ighv1-53/Ighv1-63/Ighv1-50/Pigr/Ighg1/Ighv1-11/Ighg2c/Ighv1-52/Ighv1-61/Vtcn1/Btn1a1	26
	GO:0030879	mammary gland development	17/627	165/28943	1.26018e-07	8.62876e-06	7.09075e-06	Etv4/Erbb4/Atp7b/Slit2/Irf6/Tfap2c/Atp2c2/Csn3/Tph1/Vdr/Sox9/Elf5/Pgr/Prlr/Fgfr2/Elf3/Csn2	17
	GO:0061138	morphogenesis of a branching epithelium	20/627	229/28943	1.56743e-07	1.0541e-05	8.66212e-06	Wnt9b/Etv4/Hgf/Met/Slit2/Tfap2c/Tnc/Trp63/Grhl2/Cdh1/Vdr/Sox9/Spint1/Lama1/Tacstd2/Pgr/Esrp2/Fgfr2/Foxa1/Esrp1	20
	GO:0007431	salivary gland development	9/627	41/28943	1.87275e-07	1.21599e-05	9.99251e-06	Hgf/Met/Edar/Cdh1/Tfcp2l1/Lama1/Esrp2/Fgfr2/Esrp1	9
	GO:0042572	retinol metabolic process	9/627	41/28943	1.87275e-07	1.21599e-05	9.99251e-06	Adh6a/Cyp2d12/Cyp2d34/Cyp2d11/Cyp2d9/Rbp1/Cyp1b1/Cyp2d10/Plb1	9
	GO:0070830	bicellular tight junction assembly	12/627	82/28943	2.00212e-07	1.26613e-05	1.04045e-05	Cldn22/Cldn23/Pof1b/Cldn8/Cgn/Cldn6/Grhl2/Cdh1/Marveld3/Cldn7/Cldn4/Cldn3	12
	GO:0006720	isoprenoid metabolic process	13/627	98/28943	2.03774e-07	1.26613e-05	1.04045e-05	Cyp2c55/Adh6a/Cyp2d12/Cyp2d34/Cyp2d11/Cyp26a1/Crabp1/Cyp2d9/Rbp1/Cyp1b1/Crabp2/Cyp2d10/Plb1	13
	GO:0060562	epithelial tube morphogenesis	27/627	397/28943	2.05082e-07	1.26613e-05	1.04045e-05	Wnt9b/Etv4/Kif26b/Irx3/Met/Ovol2/Slit2/Tfap2a/Tfap2c/Tnc/Cthrc1/Grhl2/Shroom3/Vdr/Sox9/Ptk7/Spint1/Lama1/Tacstd2/Pgr/Esrp2/Irx1/Fgfr2/Foxa1/Irx2/Esrp1/Lcn2	27
	GO:0035272	exocrine system development	10/627	54/28943	2.15073e-07	1.3064e-05	1.07354e-05	Hgf/Met/Edar/Cdh1/Tfcp2l1/Sox9/Lama1/Esrp2/Fgfr2/Esrp1	10
	GO:0015698	inorganic anion transport	16/627	152/28943	2.1926e-07	1.31069e-05	1.07707e-05	Slc26a7/Gabra4/Aqp6/Slc12a1/Clcnka/Ano7/Stc2/Clca1/Slc34a2/Ano1/Clic6/Gabrp/Ano9/Clca3a2/Slc5a5/Cldn4	16
	GO:0001942	hair follicle development	14/627	116/28943	2.30865e-07	1.3585e-05	1.11636e-05	Krt27/Sox21/Foxq1/Cdh3/Barx2/Edar/Tfap2c/Fermt1/Prss8/Trp63/Trps1/Sox9/Fgfr2/Krt17	14
	GO:0072044	collecting duct development	6/627	14/28943	2.61386e-07	1.51443e-05	1.24449e-05	Umod/Wnt9b/Aqp2/Wnt7b/Tfap2b/Spp1	6
	GO:0042445	hormone metabolic process	20/627	239/28943	3.12739e-07	1.75974e-05	1.44608e-05	Cyp2c55/Adh6a/Cyp2d12/Cyp2d34/Cyp2d11/Cyp26a1/Hpn/Stc2/Crabp1/Scnn1b/Crym/Cyp2d9/Rbp1/Cyp1b1/Crabp2/Cyp2d10/Spp1/Plb1/Foxa1/Slc5a5	20
	GO:0022404	molting cycle process	14/627	119/28943	3.17744e-07	1.75974e-05	1.44608e-05	Krt27/Sox21/Foxq1/Cdh3/Barx2/Edar/Tfap2c/Fermt1/Prss8/Trp63/Trps1/Sox9/Fgfr2/Krt17	14
	GO:0022405	hair cycle process	14/627	119/28943	3.17744e-07	1.75974e-05	1.44608e-05	Krt27/Sox21/Foxq1/Cdh3/Barx2/Edar/Tfap2c/Fermt1/Prss8/Trp63/Trps1/Sox9/Fgfr2/Krt17	14
	GO:0007586	digestion	15/627	138/28943	3.44067e-07	1.87791e-05	1.54318e-05	Slc26a7/Capn9/Nmu/Gpr39/Cck/Slc5a1/Cel/Mmp13/Muc4/Oxtr/Slco1a5/Vdr/Sox9/Capn8/Aqp5	15
	GO:0034754	cellular hormone metabolic process	15/627	139/28943	3.78094e-07	2.03415e-05	1.67157e-05	Cyp2c55/Adh6a/Cyp2d12/Cyp2d34/Cyp2d11/Cyp26a1/Crabp1/Scnn1b/Cyp2d9/Rbp1/Cyp1b1/Crabp2/Cyp2d10/Spp1/Plb1	15
	GO:0052547	regulation of peptidase activity	28/627	445/28943	5.91344e-07	3.11071e-05	2.55625e-05	Serpinb6e/Cst10/Spink5/Pzp/Serpinb11/Efna3/A2m/Hgf/Timp1/Cck/Prss22/Anxa8/Ltf/Col7a1/Perp/Trp63/Wap/R3hdml/Cdh1/Slpi/Spint1/Itih2/Serpinb5/Cldn4/Cldn3/Wfdc2/Csn2/Wfdc18	28
	GO:0001763	morphogenesis of a branching structure	20/627	249/28943	6.00718e-07	3.11071e-05	2.55625e-05	Wnt9b/Etv4/Hgf/Met/Slit2/Tfap2c/Tnc/Trp63/Grhl2/Cdh1/Vdr/Sox9/Spint1/Lama1/Tacstd2/Pgr/Esrp2/Fgfr2/Foxa1/Esrp1	20
	GO:0055078	sodium ion homeostasis	10/627	60/28943	6.02978e-07	3.11071e-05	2.55625e-05	Umod/Slc12a1/Atp12a/Scnn1g/Scnn1b/Scnn1a/Tfap2b/Spp1/Atp6v1b1/Upk3a	10
	GO:0006814	sodium ion transport	20/627	250/28943	6.39979e-07	3.25697e-05	2.67644e-05	Umod/Slc6a21/Slc6a14/Slc10a5/Slc12a1/Atp12a/Slc13a3/Scnn1g/Slc13a2/Scnn1b/Kcnk1/Scnn1a/Slc34a2/Prss8/Slc5a1/Slc5a9/Fxyd3/Slc5a8/Atp6v1b1/Slc5a5	20
	GO:0043297	apical junction assembly	12/627	92/28943	7.20252e-07	3.61662e-05	2.97199e-05	Cldn22/Cldn23/Pof1b/Cldn8/Cgn/Cldn6/Grhl2/Cdh1/Marveld3/Cldn7/Cldn4/Cldn3	12
	GO:0002429	immune response-activating cell surface receptor signaling pathway	24/627	349/28943	7.9521e-07	3.94047e-05	3.23811e-05	Themis3/Btn2a2/Ighv5-9-1/Ighv5-12/Ighv1-7/Ighv6-6/Ighv1-75/Ighv14-2/Ighv1-64/Ighv14-1/Ighv3-6/Ighv9-3/Ighv6-3/Ighv1-12/Ighv1-53/Ighv1-63/Ighv1-50/Ighg1/Ighv1-11/Ighg2c/Ighv1-52/Ighv1-61/Vtcn1/Btn1a1	24
	GO:0002757	immune response-activating signal transduction	24/627	350/28943	8.36721e-07	4.09232e-05	3.3629e-05	Themis3/Btn2a2/Ighv5-9-1/Ighv5-12/Ighv1-7/Ighv6-6/Ighv1-75/Ighv14-2/Ighv1-64/Ighv14-1/Ighv3-6/Ighv9-3/Ighv6-3/Ighv1-12/Ighv1-53/Ighv1-63/Ighv1-50/Ighg1/Ighv1-11/Ighg2c/Ighv1-52/Ighv1-61/Vtcn1/Btn1a1	24
	GO:0050864	regulation of B cell activation	21/627	278/28943	8.63653e-07	4.1699e-05	3.42664e-05	Ighv5-9-1/Ighv5-12/Ighv1-7/Ighv6-6/Foxj1/Ighv1-75/Ighv14-2/Ighv1-64/Ighv14-1/Ighv3-6/Ighv9-3/Ighv6-3/Ighv1-12/Ighv1-53/Ighv1-63/Ighv1-50/Ighg1/Ighv1-11/Ighg2c/Ighv1-52/Ighv1-61	21
	GO:0045682	regulation of epidermis development	10/627	63/28943	9.64272e-07	4.59677e-05	3.77743e-05	Etv4/Ovol2/Grhl1/Reg3g/Tfap2c/Kdf1/Trp63/Grhl2/Vdr/Esrp1	10
	GO:0007435	salivary gland morphogenesis	8/627	37/28943	1.02888e-06	4.84343e-05	3.98012e-05	Hgf/Met/Edar/Cdh1/Lama1/Esrp2/Fgfr2/Esrp1	8
	GO:0061180	mammary gland epithelium development	11/627	79/28943	1.07576e-06	4.84864e-05	3.9844e-05	Etv4/Erbb4/Slit2/Irf6/Tfap2c/Atp2c2/Vdr/Elf5/Pgr/Prlr/Fgfr2	11
	GO:0009820	alkaloid metabolic process	5/627	10/28943	1.08148e-06	4.84864e-05	3.9844e-05	Cyp2d12/Cyp2d34/Cyp2d11/Cyp2d9/Cyp2d10	5
	GO:0016098	monoterpenoid metabolic process	5/627	10/28943	1.08148e-06	4.84864e-05	3.9844e-05	Cyp2d12/Cyp2d34/Cyp2d11/Cyp2d9/Cyp2d10	5
	GO:0072070	loop of Henle development	5/627	10/28943	1.08148e-06	4.84864e-05	3.9844e-05	Umod/Irx3/Wnt7b/Irx1/Irx2	5
	GO:0072210	metanephric nephron development	8/627	38/28943	1.27862e-06	5.66504e-05	4.65528e-05	Wnt9b/Kif26b/Tfap2a/Tfap2b/Sox9/Irx1/Cited1/Irx2	8
	GO:0010466	negative regulation of peptidase activity	20/627	262/28943	1.33273e-06	5.83614e-05	4.79589e-05	Serpinb6e/Cst10/Spink5/Pzp/Serpinb11/A2m/Hgf/Timp1/Anxa8/Ltf/Col7a1/Wap/R3hdml/Slpi/Spint1/Itih2/Serpinb5/Wfdc2/Csn2/Wfdc18	20
	GO:0072073	kidney epithelium development	15/627	155/28943	1.53299e-06	6.63592e-05	5.45312e-05	Umod/Wnt9b/Kif26b/Irx3/Arg2/Slit2/Wnt7b/Tfap2b/Sox9/Tacstd2/Irx1/Cited1/Fgfr2/Epcam/Irx2	15
	GO:0006909	phagocytosis	25/627	390/28943	1.69355e-06	7.24764e-05	5.9558e-05	Psg20/Sftpa1/Ceacam10/Ighv5-9-1/Ighv5-12/Ighv1-7/Ighv6-6/Ighv1-75/Met/Ighv14-2/Sftpd/Ighv1-64/Ighv14-1/Ighv3-6/Ighv9-3/Ighv6-3/Ighv1-12/Ighv1-53/Ighv1-63/Ighv1-50/Ighg1/Ighv1-11/Ighg2c/Ighv1-52/Ighv1-61	25
	GO:0060445	branching involved in salivary gland morphogenesis	7/627	28/28943	1.72595e-06	7.3033e-05	6.00154e-05	Hgf/Met/Cdh1/Lama1/Esrp2/Fgfr2/Esrp1	7
	GO:0006820	anion transport	29/627	500/28943	1.92753e-06	8.06565e-05	6.628e-05	Pla2g2f/Umod/Slc26a7/Slc6a14/Gabra4/Slc10a5/Aqp6/Slc12a1/Clcnka/Slc13a3/Ano7/Slc13a2/Slc1a4/Stc2/Arg1/Arg2/Clca1/Slc44a4/Cck/Slc34a2/Ano1/Clic6/Slco1a5/Slc5a8/Gabrp/Ano9/Clca3a2/Slc5a5/Cldn4	29
	GO:0002253	activation of immune response	27/627	448/28943	2.12578e-06	8.7609e-05	7.19933e-05	C9/Themis3/Btn2a2/Ighv5-9-1/Ighv5-12/Hc/Ighv1-7/Ighv6-6/Ighv1-75/A2m/Ighv14-2/Ighv1-64/Ighv14-1/Ighv3-6/Ighv9-3/Ighv6-3/Ighv1-12/Ighv1-53/Ighv1-63/Ighv1-50/Ighg1/Ighv1-11/Ighg2c/Ighv1-52/Ighv1-61/Vtcn1/Btn1a1	27
	GO:0001890	placenta development	16/627	180/28943	2.14021e-06	8.7609e-05	7.19933e-05	Phlda2/Met/Ovol2/Gjb3/Wnt7b/Grhl2/Cdh1/Fbn2/Elf5/Spint1/Ttpa/Ptn/Cited1/Fgfr2/Krt19/Krt8	16
	GO:0033561	regulation of water loss via skin	8/627	41/28943	2.35931e-06	9.55394e-05	7.85102e-05	Krt16/Met/Grhl1/Kdf1/Tmprss13/Trp63/Cdh1/Cldn4	8
	GO:0045604	regulation of epidermal cell differentiation	9/627	56/28943	3.03296e-06	0.000121512	9.98534e-05	Etv4/Ovol2/Grhl1/Reg3g/Kdf1/Trp63/Grhl2/Vdr/Esrp1	9
	GO:0042060	wound healing	24/627	380/28943	3.51208e-06	0.000139226	0.00011441	Fga/C9/Bnc1/Muc16/Proc/Scnn1g/Krt6a/Evpl/Timp1/Reg3g/Fgb/Scnn1b/Abcc8/Anxa8/Fermt1/Fgg/Cxadr/Dsp/Eppk1/Ptk7/Arhgef19/Plet1/Cldn4/Cldn3	24
	GO:0006821	chloride transport	12/627	107/28943	3.66504e-06	0.000143776	0.000118149	Slc26a7/Gabra4/Slc12a1/Clcnka/Ano7/Clca1/Ano1/Clic6/Gabrp/Ano9/Clca3a2/Cldn4	12
	GO:0016331	morphogenesis of embryonic epithelium	16/627	188/28943	3.77171e-06	0.000146436	0.000120334	Wnt9b/Irx3/Ovol2/Tfap2a/Kdf1/Wnt7b/Cthrc1/Trp63/Grhl2/Shroom3/Sox9/Ptk7/Spint1/Irx1/Fgfr2/Irx2	16
	GO:0050680	negative regulation of epithelial cell proliferation	16/627	190/28943	4.32393e-06	0.000166162	0.000136545	Gdf5/Muc16/Krt4/Ovol1/Etv4/Hpn/Irf6/Kdf1/Eppk1/Cdh1/Vdr/Sox9/Marveld3/Ptn/Cnmd/Fgfr2	16
	GO:0001894	tissue homeostasis	20/627	286/28943	5.06753e-06	0.000192771	0.000158411	Oas1e/Il20ra/Dcstamp/Oas1h/Erbb4/Cdh3/Tnfrsf11b/Sftpd/Calca/Oas1g/Ildr1/Abcc8/Muc4/Slc28a3/Cxadr/Col9a1/Sox9/Spp1/Trf/Col2a1	20
	GO:0045616	regulation of keratinocyte differentiation	7/627	33/28943	5.66855e-06	0.000213478	0.000175427	Etv4/Ovol2/Grhl1/Reg3g/Trp63/Grhl2/Vdr	7
	GO:0098742	cell-cell adhesion via plasma-membrane adhesion molecules	17/627	217/28943	5.79871e-06	0.000216217	0.000177678	Arvcf/Umod/Cdhr2/Cntn5/Cdh18/Dsg3/Cdh3/Ptprf/Nectin4/Efna5/Cxadr/Cdh1/Fat2/Celsr2/Epcam/Lgals7/Cldn3	17
	GO:0051346	negative regulation of hydrolase activity	23/627	366/28943	6.06464e-06	0.000223916	0.000184004	Serpinb6e/Cst10/Ppp1r14d/Spink5/Pzp/Serpinb11/Hpn/A2m/Hgf/Timp1/Anxa8/Angptl4/Ltf/Col7a1/Wap/R3hdml/Slpi/Spint1/Itih2/Serpinb5/Wfdc2/Csn2/Wfdc18	23
	GO:0042130	negative regulation of T cell proliferation	10/627	78/28943	7.09665e-06	0.000259475	0.000213226	Pla2g2f/Btn2a2/Foxj1/Arg1/Arg2/Sftpd/Ido1/Vtcn1/Btn1a1/Lgals7	10
	GO:0060249	anatomical structure homeostasis	22/627	346/28943	7.99366e-06	0.000289463	0.000237868	Oas1e/Il20ra/Gpr39/Dcstamp/Oas1h/Erbb4/Cdh3/Kcnh1/Tnfrsf11b/Sftpd/Calca/Oas1g/Ildr1/Abcc8/Muc4/Slc28a3/Cxadr/Col9a1/Sox9/Spp1/Trf/Col2a1	22
	GO:0003382	epithelial cell morphogenesis	8/627	48/28943	8.1549e-06	0.000292489	0.000240355	Pof1b/Met/Cgn/Grhl2/Cdh1/Rab25/Cnmd/Cldn3	8
	GO:0061436	establishment of skin barrier	7/627	35/28943	8.59378e-06	0.000305322	0.000250901	Krt16/Met/Grhl1/Kdf1/Tmprss13/Trp63/Cldn4	7
	GO:0009698	phenylpropanoid metabolic process	5/627	15/28943	1.17778e-05	0.000407607	0.000334954	Cyp2d12/Cyp2d34/Cyp2d11/Cyp2d9/Cyp2d10	5
	GO:0009804	coumarin metabolic process	5/627	15/28943	1.17778e-05	0.000407607	0.000334954	Cyp2d12/Cyp2d34/Cyp2d11/Cyp2d9/Cyp2d10	5
	GO:0072006	nephron development	14/627	161/28943	1.17975e-05	0.000407607	0.000334954	Umod/Wnt9b/Hc/Erbb4/Kif26b/Irx3/Tfap2a/Wnt7b/Tfap2b/Sox9/Tacstd2/Irx1/Cited1/Irx2	14
	GO:0002683	negative regulation of immune system process	26/627	465/28943	1.23608e-05	0.000422346	0.000347065	Pla2g2f/Oas1e/Pglyrp3/Pglyrp4/Spink5/Btn2a2/Oas1h/Hc/Foxj1/Gpx2/A2m/Arg1/Smpdl3b/Arg2/Tnfrsf11b/Sftpd/Slit2/Ido1/Calca/Oas1g/Olfm4/Muc4/Sox9/Vtcn1/Btn1a1/Lgals7	26
	GO:0098743	cell aggregation	6/627	25/28943	1.258e-05	0.000422346	0.000347065	Barx2/Ltf/Acan/Sox9/Col11a1/Col2a1	6
	GO:0055075	potassium ion homeostasis	7/627	37/28943	1.26726e-05	0.000422346	0.000347065	Umod/Slc12a1/Atp12a/Scnn1b/Tfap2b/Atp6v1b1/Upk3a	7
	GO:0060441	epithelial tube branching involved in lung morphogenesis	7/627	37/28943	1.26726e-05	0.000422346	0.000347065	Tnc/Sox9/Lama1/Esrp2/Fgfr2/Foxa1/Esrp1	7
	GO:0022600	digestive system process	12/627	121/28943	1.31509e-05	0.000434442	0.000357006	Slc26a7/Nmu/Gpr39/Slc5a1/Cel/Mmp13/Muc4/Oxtr/Slco1a5/Vdr/Sox9/Aqp5	12
	GO:0035148	tube formation	15/627	185/28943	1.34998e-05	0.00044209	0.000363291	Wnt9b/Irx3/Ovol2/Tfap2a/Edar/Cthrc1/Grhl2/Shroom3/Cdh1/Sox9/Ptk7/Spint1/Irx1/Fgfr2/Irx2	15
	GO:0048863	stem cell differentiation	19/627	282/28943	1.46773e-05	0.000476507	0.000391573	Sox21/Etv4/Cyp26a1/Erbb4/A2m/Ovol2/Tfap2a/Tfap2c/Wnt7b/Kit/Trp63/Sox9/Nrtn/Tacstd2/Ptn/Fgfr2/Foxa1/Epcam/Krt14	19
	GO:0006883	cellular sodium ion homeostasis	6/627	26/28943	1.60553e-05	0.00051679	0.000424676	Umod/Atp12a/Scnn1g/Scnn1b/Scnn1a/Spp1	6
	GO:0003091	renal water homeostasis	5/627	16/28943	1.6826e-05	0.000537007	0.000441289	Umod/Aqp6/Aqp2/Tfap2b/Atp6v1b1	5
	GO:0030324	lung development	17/627	236/28943	1.74459e-05	0.000552112	0.000453702	Edn2/Spdef/Foxj1/Stra6/Sftpd/Tnc/Wnt7b/Grhl2/Sox9/Ptk7/Lama1/Pgr/Esrp2/Chil1/Fgfr2/Foxa1/Esrp1	17
	GO:0060425	lung morphogenesis	9/627	69/28943	1.76721e-05	0.000554608	0.000455753	Tnc/Wnt7b/Grhl2/Sox9/Lama1/Esrp2/Fgfr2/Foxa1/Esrp1	9
	GO:0048754	branching morphogenesis of an epithelial tube	15/627	191/28943	1.97156e-05	0.000613627	0.000504253	Wnt9b/Etv4/Met/Slit2/Tfap2c/Tnc/Vdr/Sox9/Lama1/Tacstd2/Pgr/Esrp2/Fgfr2/Foxa1/Esrp1	15
	GO:0010839	negative regulation of keratinocyte proliferation	6/627	27/28943	2.02657e-05	0.000620493	0.000509894	Ovol1/Irf6/Kdf1/Eppk1/Vdr/Fgfr2	6
	GO:0070989	oxidative demethylation	6/627	27/28943	2.02657e-05	0.000620493	0.000509894	Cyp2d12/Cyp2d34/Cyp2d11/Cyp2d9/Cyp2d10/Cyp3a57	6
	GO:0030323	respiratory tube development	17/627	239/28943	2.05266e-05	0.000623412	0.000512293	Edn2/Spdef/Foxj1/Stra6/Sftpd/Tnc/Wnt7b/Grhl2/Sox9/Ptk7/Lama1/Pgr/Esrp2/Chil1/Fgfr2/Foxa1/Esrp1	17
	GO:0055067	monovalent inorganic cation homeostasis	14/627	171/28943	2.33141e-05	0.000702408	0.000577208	Umod/Slc12a1/Atp12a/Gpr39/Scnn1g/Rhbg/Scnn1b/Scnn1a/Atp6v0a4/Tfap2b/Spp1/Ttpa/Atp6v1b1/Upk3a	14
	GO:0031589	cell-substrate adhesion	22/627	371/28943	2.35344e-05	0.000703417	0.000578038	Fga/Lamb3/Fut1/Ptprz1/Vwa2/Fgb/Lypd3/Itgb2l/Olfm4/Fermt1/Fgg/Muc4/Meltf/Efna5/Postn/Col16a1/Mia/Fat2/Spp1/Plet1/Tacstd2/Ptn	22
	GO:0002449	lymphocyte mediated immunity	26/627	483/28943	2.37217e-05	0.000703433	0.000578051	C9/H2-M10.6/Ighv5-9-1/Ighv5-12/Hc/Ighv1-7/Ighv6-6/Foxj1/Ighv1-75/Arg1/Ighv14-2/Ighv1-64/Ighv14-1/Ighv3-6/Ighv9-3/Ighv6-3/Ighv1-12/Muc4/Ighv1-53/Ighv1-63/Ighv1-50/Ighg1/Ighv1-11/Ighg2c/Ighv1-52/Ighv1-61	26
	GO:0060541	respiratory system development	18/627	267/28943	2.42886e-05	0.000714616	0.000587241	Edn2/Spdef/Foxj1/Stra6/Sftpd/Tnc/Ano1/Wnt7b/Grhl2/Sox9/Ptk7/Lama1/Pgr/Esrp2/Chil1/Fgfr2/Foxa1/Esrp1	18
	GO:0042573	retinoic acid metabolic process	6/627	28/28943	2.5322e-05	0.000739245	0.00060748	Cyp2c55/Adh6a/Cyp26a1/Crabp1/Rbp1/Crabp2	6
	GO:0002460	adaptive immune response based on somatic recombination of immune receptors built from immunoglobulin superfamily domains	26/627	486/28943	2.63447e-05	0.000758037	0.000622922	C9/H2-M10.6/Ighv5-9-1/Ighv5-12/Hc/Ighv1-7/Ighv6-6/Foxj1/Ighv1-75/Arg1/Ighv14-2/Ighv1-64/Ighv14-1/Ighv3-6/Ighv9-3/Ighv6-3/Ighv1-12/Muc4/Ighv1-53/Ighv1-63/Ighv1-50/Ighg1/Ighv1-11/Ighg2c/Ighv1-52/Ighv1-61	26
	GO:0060428	lung epithelium development	8/627	56/28943	2.63682e-05	0.000758037	0.000622922	Spdef/Foxj1/Stra6/Wnt7b/Grhl2/Sox9/Fgfr2/Foxa1	8
	GO:0042044	fluid transport	6/627	29/28943	3.13453e-05	0.000894291	0.000734889	Aqp6/Aqp2/Scnn1b/Slc5a1/Upk3a/Aqp5	6
	GO:0019755	one-carbon compound transport	5/627	18/28943	3.18398e-05	0.00090157	0.000740871	Umod/Aqp6/Slc12a1/Upk3a/Aqp5	5
	GO:0034308	primary alcohol metabolic process	10/627	93/28943	3.40866e-05	0.000957987	0.000787232	Adh6a/Cyp2d12/Cyp2d34/Cyp2d11/Scnn1b/Cyp2d9/Rbp1/Cyp1b1/Cyp2d10/Plb1	10
	GO:0030004	cellular monovalent inorganic cation homeostasis	11/627	113/28943	3.5663e-05	0.000994864	0.000817537	Umod/Atp12a/Gpr39/Scnn1g/Scnn1b/Scnn1a/Atp6v0a4/Tfap2b/Spp1/Ttpa/Atp6v1b1	11
	GO:0042113	B cell activation	24/627	440/28943	3.92792e-05	0.00108769	0.000893815	Nkx2-3/Ifna2/Ighv5-9-1/Ighv5-12/Ighv1-7/Ighv6-6/Foxj1/Ighv1-75/Ighv14-2/Ighv1-64/Ighv14-1/Ighv3-6/Ighv9-3/Ighv6-3/Ighv1-12/Kit/Ighv1-53/Ighv1-63/Ighv1-50/Ighg1/Ighv1-11/Ighg2c/Ighv1-52/Ighv1-61	24
	GO:0050672	negative regulation of lymphocyte proliferation	10/627	95/28943	4.10161e-05	0.00111871	0.000919311	Pla2g2f/Btn2a2/Foxj1/Arg1/Arg2/Sftpd/Ido1/Vtcn1/Btn1a1/Lgals7	10
	GO:0010944	negative regulation of transcription by competitive promoter binding	4/627	10/28943	4.12908e-05	0.00111871	0.000919311	Ovol2/Tfap2a/Muc1/Bhlhe41	4
	GO:0045617	negative regulation of keratinocyte differentiation	4/627	10/28943	4.12908e-05	0.00111871	0.000919311	Ovol2/Reg3g/Trp63/Grhl2	4
	GO:0006833	water transport	5/627	19/28943	4.24423e-05	0.0011417	0.000938197	Aqp6/Aqp2/Slc5a1/Upk3a/Aqp5	5
	GO:0032945	negative regulation of mononuclear cell proliferation	10/627	96/28943	4.49095e-05	0.00119792	0.000984399	Pla2g2f/Btn2a2/Foxj1/Arg1/Arg2/Sftpd/Ido1/Vtcn1/Btn1a1/Lgals7	10
	GO:0002377	immunoglobulin production	18/627	280/28943	4.53512e-05	0.00119792	0.000984399	Igkv4-51/Igkv6-20/Igkv12-46/Igkv8-21/Igkv14-111/Igkv3-5/Igkv17-127/Igkv8-27/Igkv4-59/Igkv16-104/Igkv13-84/Igkv14-130/Ighg1/Igkv4-50/Igkv15-103/Igkv5-39/Igkv8-16/Igkv4-55	18
	GO:0007589	body fluid secretion	11/627	116/28943	4.54866e-05	0.00119792	0.000984399	Erbb4/Atp7b/Scnn1b/Cel/Mmp13/Csn3/Vdr/Celsr2/Prlr/Aqp5/Csn2	11
	GO:0045861	negative regulation of proteolysis	21/627	361/28943	4.72994e-05	0.00123701	0.00101652	Serpinb6e/Cst10/Spink5/Pzp/Serpinb11/A2m/Hgf/Timp1/Anxa8/Ltf/Col7a1/Wap/R3hdml/Cdh1/Slpi/Spint1/Itih2/Serpinb5/Wfdc2/Csn2/Wfdc18	21
	GO:0019369	arachidonic acid metabolic process	9/627	78/28943	4.78529e-05	0.00124286	0.00102133	Pla2g2f/Cyp2c55/Cyp2d12/Cyp2d34/Cyp2d11/Cyp2d9/Cyp1b1/Cyp2d10/Alox12e	9
	GO:0001892	embryonic placenta development	11/627	118/28943	5.32572e-05	0.00137374	0.00112888	Phlda2/Ovol2/Wnt7b/Grhl2/Elf5/Spint1/Ttpa/Cited1/Fgfr2/Krt19/Krt8	11
	GO:0030858	positive regulation of epithelial cell differentiation	8/627	62/28943	5.60097e-05	0.00142586	0.00117171	Foxa3/Etv4/Foxj1/Dmbt1/Ovol2/Kdf1/Vdr/Sox9	8
	GO:0022408	negative regulation of cell-cell adhesion	15/627	209/28943	5.6035e-05	0.00142586	0.00117171	Pla2g2f/Cdsn/Btn2a2/Foxj1/Arg1/Arg2/Sftpd/Ido1/Fgg/Muc4/Cdh1/Vtcn1/Btn1a1/Epcam/Lgals7	15
	GO:0070633	transepithelial transport	6/627	32/28943	5.65864e-05	0.00143023	0.0011753	Rhbg/Scnn1b/Prss8/Slc5a1/Cxadr/Cldn3	6
	GO:0072009	nephron epithelium development	11/627	120/28943	6.2141e-05	0.00156015	0.00128207	Umod/Wnt9b/Kif26b/Irx3/Wnt7b/Tfap2b/Sox9/Tacstd2/Irx1/Cited1/Irx2	11
	GO:0001503	ossification	23/627	426/28943	6.60213e-05	0.0016466	0.0013531	Ibsp/Cst10/Tfap2a/Calca/Atp6v0a4/Wnt7b/Cthrc1/Ltf/Mmp13/Trp63/Cbs/Fbn2/Tph1/Vdr/Sox9/Spp1/Ptn/Cited1/Cnmd/Fgfr2/Atp6v1b1/Ucma/Col2a1	23
	GO:0019748	secondary metabolic process	8/627	64/28943	7.05946e-05	0.00174907	0.00143731	Cyp2d12/Cyp2d34/Cyp2d11/Cdh3/Cyp2d9/Cyp1b1/Cyp2d10/Cited1	8
	GO:0120254	olefinic compound metabolic process	13/627	166/28943	7.1615e-05	0.00175232	0.00143998	Pla2g2f/Cyp2c55/Adh6a/Cyp2d12/Cyp2d34/Cyp2d11/Scnn1b/Cyp2d9/Rbp1/Cyp1b1/Cyp2d10/Plb1/Alox12e	13
	GO:0001502	cartilage condensation	5/627	21/28943	7.16562e-05	0.00175232	0.00143998	Barx2/Acan/Sox9/Col11a1/Col2a1	5
	GO:0060512	prostate gland morphogenesis	6/627	34/28943	8.09507e-05	0.00196684	0.00161626	Tnc/Trp63/Sox9/Serpinb5/Fgfr2/Foxa1	6
	GO:0070664	negative regulation of leukocyte proliferation	10/627	103/28943	8.2055e-05	0.00198089	0.00162781	Pla2g2f/Btn2a2/Foxj1/Arg1/Arg2/Sftpd/Ido1/Vtcn1/Btn1a1/Lgals7	10
	GO:0072175	epithelial tube formation	13/627	170/28943	9.1289e-05	0.00218977	0.00179946	Wnt9b/Irx3/Ovol2/Tfap2a/Cthrc1/Grhl2/Shroom3/Sox9/Ptk7/Spint1/Irx1/Fgfr2/Irx2	13
	GO:0050777	negative regulation of immune response	14/627	194/28943	9.26566e-05	0.00220006	0.00180791	Oas1e/Pglyrp3/Pglyrp4/Spink5/Oas1h/Foxj1/Gpx2/A2m/Arg1/Smpdl3b/Arg2/Oas1g/Olfm4/Muc4	14
	GO:0032102	negative regulation of response to external stimulus	22/627	407/28943	9.28861e-05	0.00220006	0.00180791	Fga/Oas1e/Muc16/Spink5/Proc/Oas1h/Hc/Gpx2/A2m/Arg1/Hgf/Smpdl3b/Arg2/Fgb/Slit2/Cck/Oas1g/Abcc8/Fgg/Ltf/Eppk1/Cldn3	22
	GO:0001818	negative regulation of cytokine production	18/627	297/28943	9.64977e-05	0.00225829	0.00185577	Oas1e/Pglyrp3/Pglyrp4/Muc16/Btn2a2/Oas1h/Cdh3/Foxj1/Arg1/Hgf/Arg2/Met/Sftpd/Ido1/Oas1g/Inhbb/Btn1a1/Lgals7	18
	GO:0072080	nephron tubule development	10/627	105/28943	9.6544e-05	0.00225829	0.00185577	Umod/Wnt9b/Kif26b/Irx3/Wnt7b/Tfap2b/Sox9/Tacstd2/Irx1/Irx2	10
	GO:0001667	ameboidal-type cell migration	24/627	471/28943	0.00011271	0.00259815	0.00213505	Krt16/Fut1/Edn2/Erbb4/Met/Ovol2/Timp1/Slit2/Tfap2a/Calca/Cyp1b1/Itgb2l/Fermt1/Kit/Eppk1/Fbn2/Fat2/Sox9/Marveld3/Nrtn/Tacstd2/Rab25/Pak3/Lcn2	24
	GO:0033273	response to vitamin	6/627	36/28943	0.000113011	0.00259815	0.00213505	Cyp24a1/Rbp1/Postn/Cbs/Vdr/Spp1	6
	GO:0060993	kidney morphogenesis	10/627	107/28943	0.000113143	0.00259815	0.00213505	Wnt9b/Erbb4/Kif26b/Irx3/Wnt7b/Sox9/Tacstd2/Irx1/Cited1/Irx2	10
	GO:0072079	nephron tubule formation	5/627	23/28943	0.000114318	0.00260923	0.00214415	Wnt9b/Irx3/Sox9/Irx1/Irx2	5
	GO:1903034	regulation of response to wounding	13/627	177/28943	0.000137067	0.00310961	0.00255534	Fga/Muc16/Proc/Reg3g/Fgb/Abcc8/Ptprf/Fermt1/Fgg/Eppk1/Ptn/Cldn4/Cldn3	13
	GO:0030850	prostate gland development	7/627	53/28943	0.000140633	0.00317141	0.00260613	Tnc/Trp63/Sox9/Serpinb5/Prlr/Fgfr2/Foxa1	7
	GO:0098656	anion transmembrane transport	14/627	202/28943	0.000142125	0.00318596	0.00261808	Gabra4/Aqp6/Slc12a1/Slc13a3/Ano7/Slc13a2/Slc1a4/Arg1/Arg2/Slc44a4/Ano1/Gabrp/Ano9/Slc5a5	14
	GO:0072028	nephron morphogenesis	9/627	90/28943	0.000147307	0.0032826	0.0026975	Wnt9b/Erbb4/Kif26b/Irx3/Sox9/Tacstd2/Irx1/Cited1/Irx2	9
	GO:0048771	tissue remodeling	14/627	203/28943	0.00014968	0.00331585	0.00272482	Umod/Il20ra/Dcstamp/Tnfrsf11b/Timp1/Calca/Cthrc1/Cbs/Tph1/Vdr/Spp1/Trf/Ptn/Elf3	14
	GO:0061326	renal tubule development	10/627	111/28943	0.000153653	0.00338395	0.00278079	Umod/Wnt9b/Kif26b/Irx3/Wnt7b/Tfap2b/Sox9/Tacstd2/Irx1/Irx2	10
	GO:0002440	production of molecular mediator of immune response	22/627	422/28943	0.000155732	0.00340981	0.00280204	Spink5/Igkv4-51/Evpl/Arg1/Igkv6-20/Igkv12-46/Igkv8-21/Igkv14-111/Igkv3-5/Igkv17-127/Igkv8-27/Kit/Igkv4-59/Igkv16-104/Igkv13-84/Igkv14-130/Ighg1/Igkv4-50/Igkv15-103/Igkv5-39/Igkv8-16/Igkv4-55	22
	GO:0033559	unsaturated fatty acid metabolic process	11/627	133/28943	0.00015696	0.00341683	0.0028078	Pla2g2f/Cyp2c55/Cyp2d12/Cyp2d34/Edn2/Cyp2d11/Cyp2d9/Cyp1b1/Cyp2d10/Alox12e/Atp6v1b1	11
	GO:0008210	estrogen metabolic process	6/627	39/28943	0.000179162	0.00386212	0.00317373	Cyp2d12/Cyp2d34/Cyp2d11/Cyp2d9/Cyp1b1/Cyp2d10	6
	GO:0050679	positive regulation of epithelial cell proliferation	15/627	232/28943	0.000179467	0.00386212	0.00317373	Ang4/Bnc1/Erbb4/Cdh3/Hpn/Arg1/Reg3g/Trp63/Cxadr/Eppk1/Sox9/Esrp2/Ptn/Fgfr2/Esrp1	15
	GO:1900025	negative regulation of substrate adhesion-dependent cell spreading	4/627	14/28943	0.000183676	0.00393024	0.0032297	Meltf/Efna5/Postn/Tacstd2	4
	GO:0001838	embryonic epithelial tube formation	12/627	159/28943	0.000190485	0.00405292	0.00333051	Wnt9b/Irx3/Ovol2/Tfap2a/Cthrc1/Grhl2/Shroom3/Sox9/Ptk7/Spint1/Irx1/Irx2	12
	GO:0048705	skeletal system morphogenesis	16/627	261/28943	0.000203582	0.00428786	0.00352358	Wnt9b/Cst10/Barx2/Tfap2a/Ltf/Mmp13/Acan/Grhl2/Cbs/Fbn2/Col9a1/Vdr/Sox9/Fgfr2/Col11a1/Col2a1	16
	GO:0061041	regulation of wound healing	11/627	137/28943	0.000203804	0.00428786	0.00352358	Fga/Muc16/Proc/Reg3g/Fgb/Abcc8/Fermt1/Fgg/Eppk1/Cldn4/Cldn3	11
	GO:0060351	cartilage development involved in endochondral bone morphogenesis	6/627	40/28943	0.000206951	0.00432987	0.0035581	Cst10/Mmp13/Cbs/Col9a1/Sox9/Col2a1	6
	GO:0034113	heterotypic cell-cell adhesion	7/627	57/28943	0.000223869	0.00465796	0.00382771	Fga/Fgb/Itgb2l/Fgg/Perp/Cxadr/Dsp	7
	GO:0061844	antimicrobial humoral immune response mediated by antimicrobial peptide	11/627	139/28943	0.000231349	0.00478715	0.00393388	Pglyrp3/Ang4/Pglyrp4/Spink5/Krt6a/Evpl/Dmbt1/Reg3g/Cxcl15/Ltf/Defb1	11
	GO:0060603	mammary gland duct morphogenesis	6/627	41/28943	0.000238027	0.00487882	0.0040092	Etv4/Slit2/Tfap2c/Vdr/Pgr/Fgfr2	6
	GO:0051251	positive regulation of lymphocyte activation	23/627	465/28943	0.00023852	0.00487882	0.0040092	Btn2a2/Ighv5-9-1/Ighv5-12/Ighv1-7/Ighv6-6/Ighv1-75/Ighv14-2/Ighv1-64/Ighv14-1/Ighv3-6/Ighv9-3/Ighv6-3/Ighv1-12/Igfbp2/Ighv1-53/Ighv1-63/Ighv1-50/Ighg1/Ighv1-11/Ighg2c/Ighv1-52/Ighv1-61/Vtcn1	23
	GO:0061045	negative regulation of wound healing	8/627	76/28943	0.000239666	0.00487882	0.0040092	Fga/Muc16/Proc/Fgb/Abcc8/Fgg/Eppk1/Cldn3	8
	GO:0010771	negative regulation of cell morphogenesis involved in differentiation	4/627	15/28943	0.000246184	0.00498456	0.0040961	Meltf/Efna5/Postn/Tacstd2	4
	GO:0002832	negative regulation of response to biotic stimulus	10/627	118/28943	0.000253911	0.00506084	0.00415878	Oas1e/Spink5/Oas1h/A2m/Arg1/Smpdl3b/Arg2/Oas1g/Ltf/Muc4	10
	GO:0003338	metanephros morphogenesis	5/627	27/28943	0.000255327	0.00506084	0.00415878	Wnt9b/Kif26b/Wnt7b/Sox9/Cited1	5
	GO:0043129	surfactant homeostasis	5/627	27/28943	0.000255327	0.00506084	0.00415878	Oas1e/Oas1h/Erbb4/Sftpd/Oas1g	5
	GO:2000647	negative regulation of stem cell proliferation	5/627	27/28943	0.000255327	0.00506084	0.00415878	Ovol1/Ovol2/Irf6/Kdf1/Fermt1	5
	GO:0030003	cellular cation homeostasis	24/627	498/28943	0.000258216	0.00509132	0.00418383	Hcrtr2/Umod/Atp12a/Gpr39/Edn2/Scnn1g/Hcrtr1/Atp7b/Stc2/Kcnh1/Scnn1b/Scnn1a/Calca/Atp13a4/Atp6v0a4/Atp2c2/Tfap2b/Vdr/Spp1/Ttpa/Trf/Atp6v1b1/Lcn2/Mcub	24
	GO:0048730	epidermis morphogenesis	6/627	42/28943	0.000272659	0.00534809	0.00439483	Krt27/Foxq1/Tfap2a/Trp63/Fgfr2/Krt17	6
	GO:0006690	icosanoid metabolic process	11/627	142/28943	0.000278531	0.00543496	0.00446622	Pla2g2f/Cyp2c55/Cyp2d12/Cyp2d34/Edn2/Cyp2d11/Cyp2d9/Cyp1b1/Cyp2d10/Alox12e/Atp6v1b1	11
	GO:0055074	calcium ion homeostasis	18/627	324/28943	0.000282478	0.00548357	0.00450616	Hcrtr2/Umod/Cst10/Gpr39/Edn2/Hcrtr1/Atp7b/Stc2/Kcnh1/Calca/Atp13a4/Trpv6/Atp2c2/Tfap2b/Vdr/Spp1/Atp6v1b1/Mcub	18
	GO:0051216	cartilage development	14/627	216/28943	0.00028437	0.00549199	0.00451308	Matn3/Cst10/Gdf5/Barx2/Wnt7b/Mmp13/Acan/Cbs/Col9a1/Trps1/Sox9/Cnmd/Col11a1/Col2a1	14
	GO:0098661	inorganic anion transmembrane transport	8/627	78/28943	0.000286976	0.00551403	0.00453119	Gabra4/Aqp6/Slc12a1/Ano7/Ano1/Gabrp/Ano9/Slc5a5	8
	GO:0031639	plasminogen activation	5/627	28/28943	0.000305327	0.00583687	0.00479649	Fga/Hpn/Fgb/Fgg/Meltf	5
	GO:0060443	mammary gland morphogenesis	7/627	60/28943	0.000309242	0.00588184	0.00483345	Etv4/Slit2/Tfap2c/Vdr/Pgr/Fgfr2/Elf3	7
	GO:0045605	negative regulation of epidermal cell differentiation	4/627	16/28943	0.000322637	0.00604502	0.00496754	Ovol2/Reg3g/Trp63/Grhl2	4
	GO:0045683	negative regulation of epidermis development	4/627	16/28943	0.000322637	0.00604502	0.00496754	Ovol2/Reg3g/Trp63/Grhl2	4
	GO:0046007	negative regulation of activated T cell proliferation	4/627	16/28943	0.000322637	0.00604502	0.00496754	Btn2a2/Arg1/Ido1/Btn1a1	4
	GO:0010812	negative regulation of cell-substrate adhesion	7/627	61/28943	0.000342884	0.00639258	0.00525315	Ptprz1/Muc4/Meltf/Efna5/Postn/Plet1/Tacstd2	7
	GO:0090132	epithelium migration	18/627	330/28943	0.000352012	0.00653043	0.00536642	Krt16/Fut1/Edn2/Met/Slit2/Calca/Cyp1b1/Itgb2l/Fermt1/Kit/Grhl2/Eppk1/Fat2/Sox9/Marveld3/Tacstd2/Rab25/Lcn2	18
	GO:0001676	long-chain fatty acid metabolic process	10/627	123/28943	0.000355041	0.00655434	0.00538608	Pla2g2f/Cyp2c55/Cyp2d12/Cyp2d34/Cyp2d11/Cyp2d9/Cyp1b1/Cyp2d10/Acot1/Alox12e	10
	GO:0048875	chemical homeostasis within a tissue	5/627	29/28943	0.000362407	0.00665768	0.005471	Oas1e/Oas1h/Erbb4/Sftpd/Oas1g	5
	GO:0051250	negative regulation of lymphocyte activation	12/627	171/28943	0.00037228	0.00680585	0.00559275	Pla2g2f/Pglyrp3/Pglyrp4/Btn2a2/Foxj1/Arg1/Arg2/Sftpd/Ido1/Vtcn1/Btn1a1/Lgals7	12
	GO:0090130	tissue migration	18/627	332/28943	0.000378277	0.00688208	0.0056554	Krt16/Fut1/Edn2/Met/Slit2/Calca/Cyp1b1/Itgb2l/Fermt1/Kit/Grhl2/Eppk1/Fat2/Sox9/Marveld3/Tacstd2/Rab25/Lcn2	18
	GO:0060560	developmental growth involved in morphogenesis	16/627	278/28943	0.000411171	0.00743705	0.00611145	Cst10/Edn2/Kif26b/Pak6/Myo5b/Slit2/Tfap2c/Tnc/Wnt7b/Map2/Crabp2/Efna5/Postn/Sox9/Ptk7/Fgfr2	16
	GO:0003334	keratinocyte development	4/627	17/28943	0.000414706	0.00743705	0.00611145	Cdsn/Tfap2a/Tfap2c/Kdf1	4
	GO:0051385	response to mineralocorticoid	4/627	17/28943	0.000414706	0.00743705	0.00611145	Scnn1g/Scnn1b/Scnn1a/Csn1s1	4
	GO:2000241	regulation of reproductive process	14/627	225/28943	0.000429555	0.00766685	0.00630029	Crisp4/Bnc1/Ovol1/Timp1/Efcab1/Rspo1/Kit/Inhbb/Fbn2/Oxtr/Sox9/Elf5/Defb1/Plb1	14
	GO:0034142	toll-like receptor 4 signaling pathway	6/627	46/28943	0.000452503	0.00803833	0.00660556	Oas1e/Oas1h/S100a14/Oas1g/Cd14/Ltf	6
	GO:0046849	bone remodeling	9/627	105/28943	0.000470836	0.00832473	0.00684091	Il20ra/Dcstamp/Tnfrsf11b/Calca/Cthrc1/Tph1/Spp1/Trf/Ptn	9
	GO:0048565	digestive tract development	10/627	128/28943	0.000487715	0.00858287	0.00705303	Nkx2-3/Spdef/Stra6/Ovol2/Pdgfc/Kit/Trp63/Cdh1/Sox9/Fgfr2	10
	GO:0072091	regulation of stem cell proliferation	9/627	106/28943	0.00050482	0.00884256	0.00726644	Ovol1/Ovol2/Irf6/Kdf1/Fermt1/Trp63/Sox9/Fgfr2/Epcam	9
	GO:0060644	mammary gland epithelial cell differentiation	4/627	18/28943	0.000524096	0.0090956	0.00747437	Erbb4/Irf6/Elf5/Prlr	4
	GO:0072077	renal vesicle morphogenesis	4/627	18/28943	0.000524096	0.0090956	0.00747437	Wnt9b/Kif26b/Sox9/Cited1	4
	GO:0035725	sodium ion transmembrane transport	11/627	153/28943	0.000526776	0.00910017	0.00747813	Slc6a21/Slc6a14/Slc12a1/Atp12a/Scnn1g/Scnn1b/Kcnk1/Scnn1a/Prss8/Slc5a1/Fxyd3	11
	GO:0048736	appendage development	13/627	205/28943	0.000569701	0.00975225	0.00801398	Gdf5/Tfap2a/Irf6/Kdf1/Crabp2/Trp63/Grhl2/Tfap2b/Fbn2/Sox9/Lmx1b/Fgfr2/Col2a1	13
	GO:0060173	limb development	13/627	205/28943	0.000569701	0.00975225	0.00801398	Gdf5/Tfap2a/Irf6/Kdf1/Crabp2/Trp63/Grhl2/Tfap2b/Fbn2/Sox9/Lmx1b/Fgfr2/Col2a1	13
	GO:0007160	cell-matrix adhesion	14/627	233/28943	0.000607602	0.010354	0.00850846	Fga/Fut1/Vwa2/Fgb/Lypd3/Itgb2l/Fermt1/Fgg/Muc4/Efna5/Postn/Col16a1/Mia/Plet1	14
	GO:0060349	bone morphogenesis	9/627	109/28943	0.000619041	0.0105014	0.00862958	Cst10/Tfap2a/Ltf/Mmp13/Cbs/Col9a1/Sox9/Fgfr2/Col2a1	9
	GO:0072088	nephron epithelium morphogenesis	8/627	88/28943	0.000651564	0.0110035	0.00904224	Wnt9b/Kif26b/Irx3/Sox9/Tacstd2/Irx1/Cited1/Irx2	8
	GO:2000027	regulation of animal organ morphogenesis	10/627	133/28943	0.000659114	0.0110813	0.00910618	Wnt9b/Hgf/Met/Tnfrsf11b/Wnt7b/Cthrc1/Cdh1/Sox9/Ptk7/Tacstd2	10
	GO:0060740	prostate gland epithelium morphogenesis	5/627	33/28943	0.000674415	0.0112882	0.00927617	Tnc/Trp63/Sox9/Fgfr2/Foxa1	5
	GO:0050868	negative regulation of T cell activation	10/627	134/28943	0.000698743	0.0116436	0.00956825	Pla2g2f/Btn2a2/Foxj1/Arg1/Arg2/Sftpd/Ido1/Vtcn1/Btn1a1/Lgals7	10
	GO:0001738	morphogenesis of a polarized epithelium	8/627	89/28943	0.00070257	0.0116558	0.00957828	Wnt9b/Erbb4/Syne4/Wnt7b/Cthrc1/Trp63/Ptk7/Lama1	8
	GO:0001696	gastric acid secretion	4/627	20/28943	0.000801775	0.013015	0.0106952	Slc26a7/Nmu/Gpr39/Oxtr	4
	GO:0035313	wound healing, spreading of epidermal cells	4/627	20/28943	0.000801775	0.013015	0.0106952	Scnn1g/Scnn1b/Fermt1/Plet1	4
	GO:0055062	phosphate ion homeostasis	4/627	20/28943	0.000801775	0.013015	0.0106952	Umod/Slc34a2/Tfap2b/Spp1	4
	GO:0072087	renal vesicle development	4/627	20/28943	0.000801775	0.013015	0.0106952	Wnt9b/Kif26b/Sox9/Cited1	4
	GO:0072506	trivalent inorganic anion homeostasis	4/627	20/28943	0.000801775	0.013015	0.0106952	Umod/Slc34a2/Tfap2b/Spp1	4
	GO:0010038	response to metal ion	16/627	296/28943	0.000808357	0.0130656	0.0107367	Fga/Atp12a/Syt6/Gpr39/Fbp1/Aqp2/Syt8/Atp7b/Kcnh1/Fgb/Tfap2a/Abcc8/Trpv6/Fgg/Cdh1/Trf	16
	GO:0007156	homophilic cell adhesion via plasma membrane adhesion molecules	9/627	114/28943	0.000855813	0.0137735	0.0113184	Cdhr2/Cntn5/Dsg3/Cdh3/Ptprf/Nectin4/Cdh1/Fat2/Celsr2	9
	GO:0110148	biomineralization	12/627	188/28943	0.000865469	0.0138696	0.0113974	Ibsp/Cst10/Tfap2a/Fam83h/Mmp13/Fbn2/Vdr/Sox9/Spp1/Ptn/Fgfr2/Ucma	12
	GO:0010631	epithelial cell migration	17/627	328/28943	0.000896795	0.0143107	0.0117599	Krt16/Fut1/Edn2/Met/Slit2/Calca/Cyp1b1/Itgb2l/Fermt1/Kit/Eppk1/Fat2/Sox9/Marveld3/Tacstd2/Rab25/Lcn2	17
	GO:0006066	alcohol metabolic process	18/627	359/28943	0.000937888	0.0148407	0.0121955	Adh6a/Cyp2d12/Cyp2d34/Nudt11/Cyp2d11/Lipc/Sptlc3/Saa1/Scnn1b/Plpp2/Cyp2d9/Rbp1/Cyp1b1/Mtmr7/Moxd1/Cel/Cyp2d10/Plb1	18
	GO:0072507	divalent inorganic cation homeostasis	18/627	359/28943	0.000937888	0.0148407	0.0121955	Hcrtr2/Umod/Cst10/Gpr39/Edn2/Hcrtr1/Atp7b/Stc2/Kcnh1/Calca/Atp13a4/Trpv6/Atp2c2/Tfap2b/Vdr/Spp1/Atp6v1b1/Mcub	18
	GO:0050909	sensory perception of taste	7/627	72/28943	0.000943742	0.0148708	0.0122202	Car6/Scnn1g/Tas2r108/Lpo/Scnn1b/Scnn1a/Pigr	7
	GO:0044403	biological process involved in symbiotic interaction	15/627	272/28943	0.000951467	0.0149301	0.0122689	Pglyrp3/Pglyrp4/Ctsr/Gpx2/Hpn/Arg1/Tmprss4/Reg3g/Sftpd/Scnn1b/Lrrc15/Nectin4/Ltf/Spint1/Tmprss2	15
	GO:0045124	regulation of bone resorption	6/627	53/28943	0.000976047	0.0152523	0.0125336	Il20ra/Dcstamp/Tnfrsf11b/Calca/Spp1/Trf	6
	GO:1903035	negative regulation of response to wounding	8/627	94/28943	0.00100799	0.0156106	0.0128281	Fga/Muc16/Proc/Fgb/Abcc8/Fgg/Eppk1/Cldn3	8
	GO:0003401	axis elongation	5/627	36/28943	0.00101556	0.0156106	0.0128281	Tfap2c/Tnc/Sox9/Ptk7/Fgfr2	5
	GO:0031069	hair follicle morphogenesis	5/627	36/28943	0.00101556	0.0156106	0.0128281	Krt27/Foxq1/Trp63/Fgfr2/Krt17	5
	GO:0042178	xenobiotic catabolic process	5/627	36/28943	0.00101556	0.0156106	0.0128281	Cyp2d12/Cyp2d34/Cyp2d11/Cyp2d9/Cyp2d10	5
	GO:0055123	digestive system development	10/627	141/28943	0.00103471	0.0158403	0.0130169	Nkx2-3/Spdef/Stra6/Ovol2/Pdgfc/Kit/Trp63/Cdh1/Sox9/Fgfr2	10
	GO:0002934	desmosome organization	3/627	10/28943	0.00108371	0.0161955	0.0133088	Grhl1/Perp/Dsp	3
	GO:0010496	intercellular transport	3/627	10/28943	0.00108371	0.0161955	0.0133088	Gjb6/Gjb2/Gjb4	3
	GO:0060484	lung-associated mesenchyme development	3/627	10/28943	0.00108371	0.0161955	0.0133088	Wnt7b/Ptk7/Fgfr2	3
	GO:0060638	mesenchymal-epithelial cell signaling	3/627	10/28943	0.00108371	0.0161955	0.0133088	Hgf/Met/Tnc	3
	GO:0071659	negative regulation of IP-10 production	3/627	10/28943	0.00108371	0.0161955	0.0133088	Oas1e/Oas1h/Oas1g	3
	GO:2000342	negative regulation of chemokine (C-X-C motif) ligand 2 production	3/627	10/28943	0.00108371	0.0161955	0.0133088	Oas1e/Oas1h/Oas1g	3
	GO:0006875	cellular metal ion homeostasis	20/627	425/28943	0.00109187	0.0162529	0.013356	Hcrtr2/Umod/Atp12a/Gpr39/Edn2/Scnn1g/Hcrtr1/Atp7b/Stc2/Kcnh1/Scnn1b/Scnn1a/Calca/Atp13a4/Atp2c2/Vdr/Spp1/Trf/Lcn2/Mcub	20
	GO:1903532	positive regulation of secretion by cell	18/627	365/28943	0.00113053	0.0167622	0.0137744	Fga/Ang4/Nmu/Gpr39/Edn2/Fgb/Myo5b/Cck/Ildr1/Itgb2l/Ano1/Fgg/Mmp13/Inhbb/Oxtr/Vdr/Spp1/Rab15	18
	GO:0071711	basement membrane organization	5/627	37/28943	0.00115355	0.0168774	0.0138691	Lamb3/Hpn/Tfap2a/Fermt1/Lama1	5
	GO:0009063	cellular amino acid catabolic process	8/627	96/28943	0.00115647	0.0168774	0.0138691	Agxt2/Mat1a/Aass/Lao1/Arg1/Arg2/Ido1/Cbs	8
	GO:0045606	positive regulation of epidermal cell differentiation	4/627	22/28943	0.00116968	0.0168774	0.0138691	Etv4/Ovol2/Kdf1/Vdr	4
	GO:0060602	branch elongation of an epithelium	4/627	22/28943	0.00116968	0.0168774	0.0138691	Tfap2c/Tnc/Sox9/Fgfr2	4
	GO:0072170	metanephric tubule development	4/627	22/28943	0.00116968	0.0168774	0.0138691	Umod/Wnt9b/Wnt7b/Sox9	4
	GO:0072273	metanephric nephron morphogenesis	4/627	22/28943	0.00116968	0.0168774	0.0138691	Wnt9b/Kif26b/Sox9/Cited1	4
	GO:0098719	sodium ion import across plasma membrane	4/627	22/28943	0.00116968	0.0168774	0.0138691	Scnn1g/Scnn1b/Scnn1a/Slc5a1	4
	GO:0055081	anion homeostasis	6/627	55/28943	0.00118842	0.0170174	0.0139842	Umod/Slc12a1/Slc34a2/Tfap2b/Spp1/Atp6v1b1	6
	GO:1902476	chloride transmembrane transport	6/627	55/28943	0.00118842	0.0170174	0.0139842	Gabra4/Slc12a1/Ano7/Ano1/Gabrp/Ano9	6
	GO:0046887	positive regulation of hormone secretion	11/627	169/28943	0.00119726	0.017079	0.0140348	Fga/Nmu/Gpr39/Edn2/Fgb/Ildr1/Ano1/Fgg/Inhbb/Vdr/Spp1	11
	GO:0042471	ear morphogenesis	10/627	144/28943	0.00121436	0.0172576	0.0141815	Hpn/Gjb6/Tfap2a/Foxi1/Cthrc1/Sox9/Ptk7/Fgfr2/Col11a1/Col2a1	10
	GO:0042472	inner ear morphogenesis	9/627	120/28943	0.001232	0.0174426	0.0143336	Hpn/Tfap2a/Foxi1/Cthrc1/Sox9/Ptk7/Fgfr2/Col11a1/Col2a1	9
	GO:0016042	lipid catabolic process	17/627	338/28943	0.00124216	0.0175205	0.0143976	Pla2g2f/Oxct2b/Lipk/Cyp24a1/Lipc/Acox2/Liph/Alk/Cyp26a1/Smpdl3b/Crabp1/Lipm/Cyp1b1/Cel/Spp1/Plb1/Plch2	17
	GO:0060479	lung cell differentiation	5/627	38/28943	0.00130493	0.0182163	0.0149693	Spdef/Foxj1/Grhl2/Sox9/Foxa1	5
	GO:0060487	lung epithelial cell differentiation	5/627	38/28943	0.00130493	0.0182163	0.0149693	Spdef/Foxj1/Grhl2/Sox9/Foxa1	5
	GO:0010769	regulation of cell morphogenesis involved in differentiation	9/627	121/28943	0.001306	0.0182163	0.0149693	Met/Myo5b/Ptprf/Olfm4/Meltf/Efna5/Postn/Tacstd2/Pak3	9
	GO:0010810	regulation of cell-substrate adhesion	13/627	225/28943	0.00134039	0.0185585	0.0152506	Fut1/Ptprz1/Olfm4/Fermt1/Muc4/Meltf/Efna5/Postn/Col16a1/Spp1/Plet1/Tacstd2/Ptn	13
	GO:0050866	negative regulation of cell activation	13/627	225/28943	0.00134039	0.0185585	0.0152506	Pla2g2f/Pglyrp3/Pglyrp4/Btn2a2/Foxj1/Arg1/Arg2/Sftpd/Ido1/Fgg/Vtcn1/Btn1a1/Lgals7	13
	GO:0098739	import across plasma membrane	12/627	198/28943	0.00135268	0.01866	0.015334	Slc6a14/Slc12a1/Atp12a/Scnn1g/Slc1a4/Arg1/Arg2/Scnn1b/Scnn1a/Trpv6/Slc5a1/Lcn2	12
	GO:0007565	female pregnancy	11/627	172/28943	0.00137952	0.0188551	0.0154943	Pzp/A2m/Timp1/Calca/Cbs/Cdh1/Fbn2/Oxtr/Vdr/Pgr/Ptn	11
	GO:0022407	regulation of cell-cell adhesion	22/627	497/28943	0.00138598	0.0188551	0.0154943	Pla2g2f/Fga/Cdsn/Btn2a2/Foxj1/Kif26b/Arg1/Arg2/Sftpd/Fgb/Ido1/Fut9/Igfbp2/Fgg/Muc4/Efna5/Cdh1/Celsr2/Vtcn1/Btn1a1/Epcam/Lgals7	22
	GO:0019835	cytolysis	4/627	23/28943	0.00139186	0.0188551	0.0154943	C9/Gzmd/Gzme/Hc	4
	GO:0035089	establishment of apical/basal cell polarity	4/627	23/28943	0.00139186	0.0188551	0.0154943	Foxj1/Syne4/Ptk7/Lama1	4
	GO:0045056	transcytosis	4/627	23/28943	0.00139186	0.0188551	0.0154943	Gp2/Rab17/Mal2/Pigr	4
	GO:0030857	negative regulation of epithelial cell differentiation	6/627	57/28943	0.00143445	0.0192957	0.0158564	Ovol2/Reg3g/Trp63/Grhl2/Sox9/Cited1	6
	GO:0009415	response to water	3/627	11/28943	0.00146619	0.0192957	0.0158564	Umod/Aqp2/Krt8	3
	GO:0030643	cellular phosphate ion homeostasis	3/627	11/28943	0.00146619	0.0192957	0.0158564	Umod/Slc34a2/Spp1	3
	GO:0060174	limb bud formation	3/627	11/28943	0.00146619	0.0192957	0.0158564	Sox9/Fgfr2/Col2a1	3
	GO:0060693	regulation of branching involved in salivary gland morphogenesis	3/627	11/28943	0.00146619	0.0192957	0.0158564	Hgf/Met/Cdh1	3
	GO:0071612	IP-10 production	3/627	11/28943	0.00146619	0.0192957	0.0158564	Oas1e/Oas1h/Oas1g	3
	GO:0071658	regulation of IP-10 production	3/627	11/28943	0.00146619	0.0192957	0.0158564	Oas1e/Oas1h/Oas1g	3
	GO:0072502	cellular trivalent inorganic anion homeostasis	3/627	11/28943	0.00146619	0.0192957	0.0158564	Umod/Slc34a2/Spp1	3
	GO:0006775	fat-soluble vitamin metabolic process	5/627	39/28943	0.00147049	0.0192957	0.0158564	Cyp24a1/Cyp26a1/Crabp1/Rbp1/Ttpa	5
	GO:1903038	negative regulation of leukocyte cell-cell adhesion	10/627	148/28943	0.00149265	0.0194687	0.0159985	Pla2g2f/Btn2a2/Foxj1/Arg1/Arg2/Sftpd/Ido1/Vtcn1/Btn1a1/Lgals7	10
	GO:0060326	cell chemotaxis	16/627	314/28943	0.00149401	0.0194687	0.0159985	Edn2/Hc/S100a14/Hgf/Met/Slit2/Efcab1/Calca/Tmem102/Itgb2l/Cxcl15/Kit/Cxadr/Il17b/Spp1/Ptn	16
	GO:0030595	leukocyte chemotaxis	13/627	228/28943	0.00150911	0.0195977	0.0161045	Edn2/Hc/S100a14/Slit2/Calca/Tmem102/Itgb2l/Cxcl15/Kit/Cxadr/Il17b/Spp1/Ptn	13
	GO:0035107	appendage morphogenesis	11/627	175/28943	0.00158395	0.0204287	0.0167874	Gdf5/Tfap2a/Crabp2/Trp63/Grhl2/Tfap2b/Fbn2/Sox9/Lmx1b/Fgfr2/Col2a1	11
	GO:0035108	limb morphogenesis	11/627	175/28943	0.00158395	0.0204287	0.0167874	Gdf5/Tfap2a/Crabp2/Trp63/Grhl2/Tfap2b/Fbn2/Sox9/Lmx1b/Fgfr2/Col2a1	11
	GO:0002695	negative regulation of leukocyte activation	12/627	202/28943	0.00160245	0.0205558	0.0168919	Pla2g2f/Pglyrp3/Pglyrp4/Btn2a2/Foxj1/Arg1/Arg2/Sftpd/Ido1/Vtcn1/Btn1a1/Lgals7	12
	GO:0031638	zymogen activation	8/627	101/28943	0.00160473	0.0205558	0.0168919	Fga/Ctsr/Hpn/Fgb/Fgg/Meltf/Perp/Hp	8
	GO:1901606	alpha-amino acid catabolic process	7/627	79/28943	0.00163124	0.0208246	0.0171127	Agxt2/Mat1a/Aass/Arg1/Arg2/Ido1/Cbs	7
	GO:0003417	growth plate cartilage development	4/627	24/28943	0.00164186	0.0208893	0.017166	Cst10/Mmp13/Col9a1/Sox9	4
	GO:0007595	lactation	6/627	60/28943	0.00187396	0.023762	0.0195266	Erbb4/Atp7b/Csn3/Vdr/Prlr/Csn2	6
	GO:0031214	biomineral tissue development	11/627	179/28943	0.00189441	0.0238857	0.0196283	Ibsp/Cst10/Tfap2a/Fam83h/Mmp13/Fbn2/Vdr/Sox9/Spp1/Ptn/Fgfr2	11
	GO:0061162	establishment of monopolar cell polarity	4/627	25/28943	0.00192142	0.0238857	0.0196283	Foxj1/Syne4/Ptk7/Lama1	4
	GO:0072207	metanephric epithelium development	4/627	25/28943	0.00192142	0.0238857	0.0196283	Umod/Wnt9b/Wnt7b/Sox9	4
	GO:0060433	bronchus development	3/627	12/28943	0.00192358	0.0238857	0.0196283	Spdef/Wnt7b/Sox9	3
	GO:0060453	regulation of gastric acid secretion	3/627	12/28943	0.00192358	0.0238857	0.0196283	Nmu/Gpr39/Oxtr	3
	GO:0060525	prostate glandular acinus development	3/627	12/28943	0.00192358	0.0238857	0.0196283	Trp63/Fgfr2/Foxa1	3
	GO:0015849	organic acid transport	16/627	322/28943	0.00192811	0.0238857	0.0196283	Pla2g2f/Umod/Slc26a7/Slc6a14/Slc10a5/Slc13a3/Slc13a2/Slc1a4/Arg1/Crabp1/Arg2/Cck/Rbp1/Crabp2/Slco1a5/Slc5a8	16
	GO:0050900	leukocyte migration	18/627	385/28943	0.00203389	0.0251136	0.0206373	Nkx2-3/Umod/Gp2/Edn2/Hc/Foxj1/S100a14/Slit2/Calca/Fut9/Tmem102/Itgb2l/Cxcl15/Kit/Cxadr/Il17b/Spp1/Ptn	18
	GO:0060711	labyrinthine layer development	6/627	62/28943	0.00221901	0.0271184	0.0222847	Ovol2/Wnt7b/Grhl2/Spint1/Cited1/Fgfr2	6
	GO:0030859	polarized epithelial cell differentiation	4/627	26/28943	0.00223226	0.0271184	0.0222847	Syne4/Trp63/Ptk7/Lama1	4
	GO:0045684	positive regulation of epidermis development	4/627	26/28943	0.00223226	0.0271184	0.0222847	Etv4/Ovol2/Kdf1/Vdr	4
	GO:0055064	chloride ion homeostasis	4/627	26/28943	0.00223226	0.0271184	0.0222847	Umod/Slc12a1/Spp1/Atp6v1b1	4
	GO:0061339	establishment or maintenance of monopolar cell polarity	4/627	26/28943	0.00223226	0.0271184	0.0222847	Foxj1/Syne4/Ptk7/Lama1	4
	GO:0030282	bone mineralization	9/627	131/28943	0.00226152	0.0273854	0.0225042	Ibsp/Tfap2a/Mmp13/Fbn2/Vdr/Sox9/Spp1/Ptn/Fgfr2	9
	GO:0006631	fatty acid metabolic process	20/627	453/28943	0.00230837	0.0278306	0.02287	Pla2g2f/Cyp2c55/Cyp2d12/Cyp2d34/Them5/Cyp24a1/Edn2/Cyp2d11/Lipc/Acox2/Olah/Liph/Elovl4/Cyp2d9/Cyp1b1/Cyp2d10/Sox9/Acot1/Alox12e/Atp6v1b1	20
	GO:0001657	ureteric bud development	8/627	107/28943	0.00231305	0.0278306	0.02287	Wnt9b/Kif26b/Arg2/Slit2/Sox9/Tacstd2/Fgfr2/Epcam	8
	GO:0001736	establishment of planar polarity	6/627	63/28943	0.00240849	0.0287948	0.0236623	Wnt9b/Erbb4/Wnt7b/Cthrc1/Trp63/Ptk7	6
	GO:0046850	regulation of bone remodeling	6/627	63/28943	0.00240849	0.0287948	0.0236623	Il20ra/Dcstamp/Tnfrsf11b/Calca/Spp1/Trf	6
	GO:0045618	positive regulation of keratinocyte differentiation	3/627	13/28943	0.00246061	0.0292324	0.0240219	Etv4/Ovol2/Vdr	3
	GO:0048012	hepatocyte growth factor receptor signaling pathway	3/627	13/28943	0.00246061	0.0292324	0.0240219	Muc20/Hgf/Met	3
	GO:0002251	organ or tissue specific immune response	7/627	85/28943	0.00248609	0.0294422	0.0241943	Umod/Gp2/Ifnlr1/Rab17/Ltf/Pigr/Defb1	7
	GO:1990266	neutrophil migration	9/627	133/28943	0.00250654	0.0295913	0.0243169	Umod/Gp2/Edn2/Slit2/Itgb2l/Cxcl15/Cxadr/Il17b/Spp1	9
	GO:0055083	monovalent inorganic anion homeostasis	4/627	27/28943	0.00257608	0.0300356	0.024682	Umod/Slc12a1/Spp1/Atp6v1b1	4
	GO:0072567	chemokine (C-X-C motif) ligand 2 production	4/627	27/28943	0.00257608	0.0300356	0.024682	Oas1e/Oas1h/Oas1g/Postn	4
	GO:1901857	positive regulation of cellular respiration	4/627	27/28943	0.00257608	0.0300356	0.024682	Oas1e/Oas1h/Ifnlr1/Oas1g	4
	GO:2000341	regulation of chemokine (C-X-C motif) ligand 2 production	4/627	27/28943	0.00257608	0.0300356	0.024682	Oas1e/Oas1h/Oas1g/Postn	4
	GO:0007164	establishment of tissue polarity	6/627	64/28943	0.00260988	0.0303358	0.0249287	Wnt9b/Erbb4/Wnt7b/Cthrc1/Trp63/Ptk7	6
	GO:0097529	myeloid leukocyte migration	13/627	243/28943	0.00263876	0.0305056	0.0250682	Umod/Gp2/Edn2/Hc/S100a14/Slit2/Calca/Itgb2l/Cxcl15/Kit/Cxadr/Il17b/Spp1	13
	GO:0061448	connective tissue development	15/627	302/28943	0.00264147	0.0305056	0.0250682	Matn3/Cst10/Gdf5/Barx2/Wnt7b/Mmp13/Acan/Cbs/Col9a1/Trps1/Sox9/Cnmd/Foxa1/Col11a1/Col2a1	15
	GO:0007613	memory	10/627	160/28943	0.00265099	0.0305056	0.0250682	Gria1/Shisa7/Pak6/Cck/Abcc8/Oxtr/Ptn/Shank2/Lmx1b/Lcn2	10
	GO:0072078	nephron tubule morphogenesis	7/627	86/28943	0.00265689	0.0305056	0.0250682	Wnt9b/Kif26b/Irx3/Sox9/Tacstd2/Irx1/Irx2	7
	GO:0031348	negative regulation of defense response	13/627	244/28943	0.0027337	0.0312744	0.0257	Oas1e/Spink5/Proc/Oas1h/Gpx2/A2m/Arg1/Hgf/Smpdl3b/Arg2/Slit2/Cck/Oas1g	13
	GO:0072163	mesonephric epithelium development	8/627	110/28943	0.00274876	0.0312744	0.0257	Wnt9b/Kif26b/Arg2/Slit2/Sox9/Tacstd2/Fgfr2/Epcam	8
	GO:0072164	mesonephric tubule development	8/627	110/28943	0.00274876	0.0312744	0.0257	Wnt9b/Kif26b/Arg2/Slit2/Sox9/Tacstd2/Fgfr2/Epcam	8
	GO:0006643	membrane lipid metabolic process	11/627	188/28943	0.00277587	0.0313088	0.0257283	Cwh43/Sptlc3/Elovl4/Cers3/Smpdl3b/Plpp2/Cyp1b1/Fut9/Kit/Cel/Map7	11
	GO:0010951	negative regulation of endopeptidase activity	11/627	188/28943	0.00277587	0.0313088	0.0257283	Serpinb6e/Cst10/Spink5/Serpinb11/A2m/Hgf/Timp1/Anxa8/Ltf/Serpinb5/Csn2	11
	GO:0007409	axonogenesis	21/627	493/28943	0.00277673	0.0313088	0.0257283	Actbl2/Fezf2/Cntn5/Slitrk5/Edn2/Etv4/Ptprz1/Lamc2/Efna3/Efna4/Myo5b/Slit2/Cck/Boc/Wnt7b/Map2/Crabp2/Efna5/Lama1/Pak3/Fgfr2	21
	GO:0046006	regulation of activated T cell proliferation	5/627	45/28943	0.00280561	0.03154	0.0259182	Btn2a2/Arg1/Ido1/Igfbp2/Btn1a1	5
	GO:0060713	labyrinthine layer morphogenesis	4/627	28/28943	0.00295454	0.0330172	0.0271321	Wnt7b/Grhl2/Spint1/Fgfr2	4
	GO:0090103	cochlea morphogenesis	4/627	28/28943	0.00295454	0.0330172	0.0271321	Hpn/Cthrc1/Sox9/Ptk7	4
	GO:0050808	synapse organization	21/627	496/28943	0.00297952	0.0331979	0.0272806	Cntn5/Shisa7/Slitrk5/Erbb4/Myo5b/Rab17/Sptbn2/Tnc/Ptprf/Wnt7b/Ngef/Col4a5/Efna5/Cdh1/Oxtr/Nrxn3/Ptn/Pak3/Shank2/Lmx1b/Fgfr2	21
	GO:0044703	multi-organism reproductive process	11/627	190/28943	0.00301077	0.033253	0.0273259	Pzp/A2m/Timp1/Calca/Cbs/Cdh1/Fbn2/Oxtr/Vdr/Pgr/Ptn	11
	GO:0051701	biological process involved in interaction with host	10/627	163/28943	0.00303111	0.033253	0.0273259	Pglyrp3/Pglyrp4/Ctsr/Tmprss4/Sftpd/Lrrc15/Nectin4/Ltf/Spint1/Tmprss2	10
	GO:0097530	granulocyte migration	10/627	163/28943	0.00303111	0.033253	0.0273259	Umod/Gp2/Edn2/S100a14/Slit2/Itgb2l/Cxcl15/Cxadr/Il17b/Spp1	10
	GO:0048286	lung alveolus development	6/627	66/28943	0.00305023	0.033253	0.0273259	Edn2/Stra6/Sftpd/Pgr/Fgfr2/Foxa1	6
	GO:0060688	regulation of morphogenesis of a branching structure	6/627	66/28943	0.00305023	0.033253	0.0273259	Hgf/Met/Cdh1/Sox9/Tacstd2/Fgfr2	6
	GO:0014820	tonic smooth muscle contraction	3/627	14/28943	0.0030816	0.033253	0.0273259	Nmu/Edn2/Scnn1b	3
	GO:0034116	positive regulation of heterotypic cell-cell adhesion	3/627	14/28943	0.0030816	0.033253	0.0273259	Fga/Fgb/Fgg	3
	GO:0042363	fat-soluble vitamin catabolic process	3/627	14/28943	0.0030816	0.033253	0.0273259	Cyp24a1/Cyp26a1/Crabp1	3
	GO:0060670	branching involved in labyrinthine layer morphogenesis	3/627	14/28943	0.0030816	0.033253	0.0273259	Grhl2/Spint1/Fgfr2	3
	GO:0060736	prostate gland growth	3/627	14/28943	0.0030816	0.033253	0.0273259	Sox9/Prlr/Fgfr2	3
	GO:1905048	regulation of metallopeptidase activity	3/627	14/28943	0.0030816	0.033253	0.0273259	Timp1/Cldn4/Cldn3	3
	GO:0035136	forelimb morphogenesis	5/627	46/28943	0.00309257	0.033276	0.0273448	Gdf5/Tfap2a/Crabp2/Trp63/Tfap2b	5
	GO:0001823	mesonephros development	8/627	113/28943	0.00324601	0.0348275	0.0286198	Wnt9b/Kif26b/Arg2/Slit2/Sox9/Tacstd2/Fgfr2/Epcam	8
	GO:0060350	endochondral bone morphogenesis	6/627	67/28943	0.00329012	0.0352005	0.0289263	Cst10/Mmp13/Cbs/Col9a1/Sox9/Col2a1	6
	GO:0098657	import into cell	13/627	250/28943	0.00336373	0.0358438	0.0294549	Slc6a14/Slc12a1/Atp12a/Scnn1g/Stra6/Slc1a4/Arg1/Arg2/Scnn1b/Scnn1a/Trpv6/Slc5a1/Lcn2	13
	GO:0060444	branching involved in mammary gland duct morphogenesis	4/627	29/28943	0.00336928	0.0358438	0.0294549	Etv4/Tfap2c/Vdr/Pgr	4
	GO:0009268	response to pH	5/627	47/28943	0.0034001	0.0359685	0.0295573	Scnn1g/Scnn1b/Scnn1a/Abcc8/Ttpa	5
	GO:0060135	maternal process involved in female pregnancy	5/627	47/28943	0.0034001	0.0359685	0.0295573	Cbs/Cdh1/Vdr/Pgr/Ptn	5
	GO:0006805	xenobiotic metabolic process	8/627	114/28943	0.0034264	0.0361452	0.0297025	Cyp2c55/Cyp2d12/Cyp2d34/Cyp2d11/Cyp26a1/Cyp2d9/Cyp1b1/Cyp2d10	8
	GO:0007584	response to nutrient	6/627	68/28943	0.00354378	0.037279	0.0306343	Cyp24a1/Rbp1/Postn/Cbs/Vdr/Spp1	6
	GO:0051606	detection of stimulus	14/627	283/28943	0.00373844	0.038896	0.0319631	Cdhr2/Pglyrp3/Pglyrp4/Car6/Tas2r108/Lpo/Hpn/Dmbt1/Calca/Piezo2/Ano1/Kit/Pigr/Col11a1	14
	GO:0010838	positive regulation of keratinocyte proliferation	3/627	15/28943	0.00379045	0.038896	0.0319631	Cdh3/Reg3g/Trp63	3
	GO:0033280	response to vitamin D	3/627	15/28943	0.00379045	0.038896	0.0319631	Cyp24a1/Vdr/Spp1	3
	GO:0060700	regulation of ribonuclease activity	3/627	15/28943	0.00379045	0.038896	0.0319631	Oas1e/Oas1h/Oas1g	3
	GO:0060742	epithelial cell differentiation involved in prostate gland development	3/627	15/28943	0.00379045	0.038896	0.0319631	Trp63/Fgfr2/Foxa1	3
	GO:0071468	cellular response to acidic pH	3/627	15/28943	0.00379045	0.038896	0.0319631	Scnn1g/Scnn1b/Scnn1a	3
	GO:0071599	otic vesicle development	3/627	15/28943	0.00379045	0.038896	0.0319631	Sox9/Fgfr2/Col2a1	3
	GO:0072283	metanephric renal vesicle morphogenesis	3/627	15/28943	0.00379045	0.038896	0.0319631	Wnt9b/Kif26b/Cited1	3
	GO:0110096	cellular response to aldehyde	3/627	15/28943	0.00379045	0.038896	0.0319631	Scnn1g/Scnn1b/Scnn1a	3
	GO:0042129	regulation of T cell proliferation	11/627	196/28943	0.00381284	0.0389008	0.031967	Pla2g2f/Btn2a2/Foxj1/Arg1/Arg2/Sftpd/Ido1/Igfbp2/Vtcn1/Btn1a1/Lgals7	11
	GO:0032682	negative regulation of chemokine production	4/627	30/28943	0.00382191	0.0389008	0.031967	Oas1e/Oas1h/Arg2/Oas1g	4
	GO:1902042	negative regulation of extrinsic apoptotic signaling pathway via death domain receptors	4/627	30/28943	0.00382191	0.0389008	0.031967	Fga/Hgf/Fgb/Fgg	4
	GO:0043583	ear development	13/627	254/28943	0.0038458	0.0390385	0.0320802	Stra6/Hpn/Gjb6/Tfap2a/Foxi1/Cthrc1/Cdh1/Sox9/Ptk7/Fgfr2/Esrp1/Col11a1/Col2a1	13
	GO:0061333	renal tubule morphogenesis	7/627	92/28943	0.00387835	0.039263	0.0322647	Wnt9b/Kif26b/Irx3/Sox9/Tacstd2/Irx1/Irx2	7
	GO:0038127	ERBB signaling pathway	8/627	117/28943	0.00401449	0.0405323	0.0333077	Erbb4/Fam83b/Fam83a/Tfap2a/Ptprf/Cblc/Pigr/Sox9	8
	GO:0071248	cellular response to metal ion	10/627	170/28943	0.00408787	0.0411178	0.0337889	Syt6/Gpr39/Fbp1/Aqp2/Syt8/Atp7b/Kcnh1/Tfap2a/Cdh1/Trf	10
	GO:0001960	negative regulation of cytokine-mediated signaling pathway	6/627	70/28943	0.00409431	0.0411178	0.0337889	Oas1e/Oas1h/Arg1/Slit2/Oas1g/Ptprf	6
	GO:0009410	response to xenobiotic stimulus	15/627	317/28943	0.00414667	0.0415329	0.0341299	Cyp2c55/Umod/Cyp2d12/Cyp2d34/Slitrk5/Cyp2d11/Fbp1/Cyp26a1/Ptpn5/Scnn1b/Cyp2d9/Cyp1b1/Cyp2d10/Shank2/Lcn2	15
	GO:0010669	epithelial structure maintenance	4/627	31/28943	0.00431399	0.0430941	0.0354129	Ildr1/Muc4/Cxadr/Sox9	4
	GO:0044282	small molecule catabolic process	16/627	350/28943	0.00435842	0.0434228	0.035683	Oxct2b/Agxt2/Cyp24a1/Acox2/Mat1a/Cyp26a1/Aass/Lao1/Arg1/Crabp1/Arg2/Ido1/Mtmr7/Cel/Cbs/Urah	16
	GO:0090102	cochlea development	5/627	50/28943	0.00445413	0.0442592	0.0363703	Hpn/Cthrc1/Cdh1/Sox9/Ptk7	5
	GO:0009111	vitamin catabolic process	3/627	16/28943	0.00459072	0.0452582	0.0371912	Cyp24a1/Cyp26a1/Crabp1	3
	GO:0016264	gap junction assembly	3/627	16/28943	0.00459072	0.0452582	0.0371912	Irx3/Gjb6/Gjb2	3
	GO:0042048	olfactory behavior	3/627	16/28943	0.00459072	0.0452582	0.0371912	Gjb4/Lmx1b/Atp6v1b1	3
	GO:0007611	learning or memory	15/627	321/28943	0.00464868	0.0455391	0.037422	Gria1/Shisa7/Ptprz1/Stra6/Pak6/Cck/Abcc8/Kit/Dgki/Oxtr/Nrxn3/Ptn/Shank2/Lmx1b/Lcn2	15
	GO:0002065	columnar/cuboidal epithelial cell differentiation	9/627	146/28943	0.00465548	0.0455391	0.037422	Spdef/Dmbt1/Trp63/Shroom3/Cdh1/Sox9/Pgr/Fgfr2/Foxa1	9
	GO:0006665	sphingolipid metabolic process	9/627	146/28943	0.00465548	0.0455391	0.037422	Sptlc3/Elovl4/Cers3/Smpdl3b/Plpp2/Fut9/Kit/Cel/Map7	9
	GO:0050830	defense response to Gram-positive bacterium	10/627	174/28943	0.00481094	0.0469378	0.0385715	Pglyrp3/Ang4/Pglyrp4/Sprr2a3/Defb15/Krt6a/Dmbt1/Reg3g/Ltf/Defb1	10
	GO:0003416	endochondral bone growth	4/627	32/28943	0.00484706	0.0469729	0.0386003	Cst10/Mmp13/Col9a1/Sox9	4
	GO:2000352	negative regulation of endothelial cell apoptotic process	4/627	32/28943	0.00484706	0.0469729	0.0386003	Fga/Fgb/Fgg/Angptl4	4
	GO:1902041	regulation of extrinsic apoptotic signaling pathway via death domain receptors	5/627	51/28943	0.00485196	0.0469729	0.0386003	Fga/Hgf/Fgb/Fgg/Trps1	5
	GO:0072089	stem cell proliferation	9/627	147/28943	0.00486658	0.0469937	0.0386174	Ovol1/Ovol2/Irf6/Kdf1/Fermt1/Trp63/Sox9/Fgfr2/Epcam	9
	GO:0006874	cellular calcium ion homeostasis	14/627	292/28943	0.00491455	0.0473355	0.0388983	Hcrtr2/Umod/Gpr39/Edn2/Hcrtr1/Atp7b/Stc2/Kcnh1/Calca/Atp13a4/Atp2c2/Vdr/Spp1/Mcub	14
	GO:1905330	regulation of morphogenesis of an epithelium	6/627	73/28943	0.00503526	0.0483341	0.0397189	Hgf/Met/Cdh1/Sox9/Tacstd2/Lcn2	6
	GO:0051047	positive regulation of secretion	18/627	420/28943	0.00505362	0.0483341	0.0397189	Fga/Ang4/Nmu/Gpr39/Edn2/Fgb/Myo5b/Cck/Ildr1/Itgb2l/Ano1/Fgg/Mmp13/Inhbb/Oxtr/Vdr/Spp1/Rab15	18
	GO:0048608	reproductive structure development	15/627	324/28943	0.00505673	0.0483341	0.0397189	Wnt9b/Edn2/Stra6/Tnc/Kit/Map7/Trp63/Cdh1/Sox9/Pgr/Serpinb5/Col9a3/Prlr/Fgfr2/Foxa1	15
	GO:0044706	multi-multicellular organism process	11/627	204/28943	0.00513825	0.0489874	0.0402558	Pzp/A2m/Timp1/Calca/Cbs/Cdh1/Fbn2/Oxtr/Vdr/Pgr/Ptn	11
	GO:0098659	inorganic cation import across plasma membrane	8/627	122/28943	0.0051641	0.0489874	0.0402558	Slc12a1/Atp12a/Scnn1g/Scnn1b/Scnn1a/Trpv6/Slc5a1/Lcn2	8
	GO:0099587	inorganic ion import across plasma membrane	8/627	122/28943	0.0051641	0.0489874	0.0402558	Slc12a1/Atp12a/Scnn1g/Scnn1b/Scnn1a/Trpv6/Slc5a1/Lcn2	8
	GO_BP_UP DEGs
	ID	Description	Gene Ratio	Bg Ratio	P value	P Adj	q value	Gene ID	Count
	GO:0003012	muscle system process	62/282	432/28943	7.32806e-54	1.79024e-50	1.47333e-50	Myh2/Myh1/Scn4a/Ryr1/Myh4/Ttn/Tnnt3/Myl3/Atp2a1/Casq1/Myh7/Actn3/Mybpc1/Cacna1s/Myom2/Mybpc2/Myoz1/Jsrp1/Tcap/Mylk2/Myl2/Tmem38a/Lmod3/Trim72/Cmya5/Tnni2/Hrc/Tnni1/Clcn1/Pgam2/Myl1/Slc8a3/Srl/Scn4b/Ucn/Cacng1/Prkag3/Tnnc2/Aldoa/Stac3/Asb2/Tnnc1/Mylpf/Myom1/Myoz2/Myom3/Actc1/Atp1a2/Actn2/Scn1b/Slc25a4/Tpm2/Tnnt1/Tmod4/Kbtbd13/Sln/Hamp2/Tmod1/Chrne/Nppc/Myh6/Myh13	62
	GO:0006936	muscle contraction	50/282	317/28943	2.10078e-45	2.5661e-42	2.11184e-42	Myh2/Myh1/Scn4a/Ryr1/Myh4/Ttn/Tnnt3/Myl3/Atp2a1/Casq1/Myh7/Actn3/Mybpc1/Cacna1s/Myom2/Mybpc2/Jsrp1/Tcap/Mylk2/Myl2/Tmem38a/Lmod3/Tnni2/Tnni1/Clcn1/Pgam2/Myl1/Slc8a3/Scn4b/Ucn/Cacng1/Tnnc2/Aldoa/Stac3/Tnnc1/Mylpf/Myom1/Myom3/Actc1/Atp1a2/Actn2/Scn1b/Tpm2/Tnnt1/Tmod4/Kbtbd13/Tmod1/Chrne/Myh6/Myh13	50
	GO:0055001	muscle cell development	42/282	229/28943	5.04556e-41	4.10876e-38	3.38141e-38	Ryr1/Sypl2/Ttn/Tnnt3/Neb/Casq1/Myh7/Actn3/Acta1/Cacna1s/Myom2/Myoz1/Tcap/Myl2/Nrap/Lmod3/Myo18b/Alpk3/Mypn/Ldb3/Klhl41/Stac3/Asb2/Tmem182/Klhl40/Six1/Myoz2/Flnc/Actc1/Actn2/Slc25a4/Tnnt1/Tmod4/Capn3/Ankrd23/Cavin4/Myf6/Hamp2/Tmod1/Speg/Myh6/Alpk2	42
	GO:0051146	striated muscle cell differentiation	46/282	334/28943	5.50582e-39	3.36268e-36	2.7674e-36	Ryr1/Ttn/Tnnt3/Neb/Casq1/Myh7/Actn3/Acta1/Cacna1s/Myom2/Myoz1/Tcap/Mylk2/Myl2/Nrap/Lmod3/Trim72/Plpp7/Myo18b/Smyd1/Alpk3/Mypn/Ldb3/Klhl41/Stac3/Asb2/Tmem182/Klhl40/Six1/Myoz2/Flnc/Actc1/Actn2/Slc25a4/Tnnt1/Tmod4/Popdc3/Capn3/Ankrd23/Cavin4/Myf6/Hamp2/Tmod1/Speg/Myh6/Alpk2	46
	GO:0042692	muscle cell differentiation	48/282	449/28943	2.07755e-35	1.01509e-32	8.35395e-33	Ryr1/Sypl2/Ttn/Tnnt3/Neb/Casq1/Myh7/Actn3/Acta1/Cacna1s/Myom2/Myoz1/Tcap/Mylk2/Myl2/Nrap/Lmod3/Trim72/Plpp7/Myo18b/Smyd1/Alpk3/Mypn/Ldb3/Klhl41/Stac3/Asb2/Tmem182/Fbxo40/Klhl40/Six1/Myoz2/Flnc/Actc1/Actn2/Slc25a4/Tnnt1/Tmod4/Popdc3/Capn3/Ankrd23/Cavin4/Myf6/Hamp2/Tmod1/Speg/Myh6/Alpk2	48
	GO:0030239	myofibril assembly	26/282	71/28943	1.87815e-34	7.6472e-32	6.29345e-32	Ttn/Tnnt3/Neb/Casq1/Myh7/Acta1/Myom2/Myoz1/Tcap/Myl2/Nrap/Lmod3/Mypn/Ldb3/Klhl41/Myoz2/Flnc/Actc1/Actn2/Tnnt1/Tmod4/Capn3/Ankrd23/Cavin4/Tmod1/Myh6	26
	GO:0055002	striated muscle cell development	26/282	72/28943	2.91463e-34	1.01721e-31	8.37134e-32	Ttn/Tnnt3/Neb/Casq1/Myh7/Acta1/Myom2/Myoz1/Tcap/Myl2/Nrap/Lmod3/Mypn/Ldb3/Klhl41/Myoz2/Flnc/Actc1/Actn2/Tnnt1/Tmod4/Capn3/Ankrd23/Cavin4/Tmod1/Myh6	26
	GO:0006941	striated muscle contraction	33/282	173/28943	5.98554e-33	1.82783e-30	1.50426e-30	Scn4a/Ttn/Tnnt3/Myl3/Atp2a1/Casq1/Myh7/Actn3/Cacna1s/Jsrp1/Tcap/Mylk2/Myl2/Tmem38a/Lmod3/Tnni2/Tnni1/Pgam2/Myl1/Slc8a3/Scn4b/Ucn/Tnnc2/Aldoa/Stac3/Tnnc1/Actc1/Atp1a2/Scn1b/Tnnt1/Kbtbd13/Chrne/Myh6	33
	GO:0007517	muscle organ development	38/282	371/28943	2.05476e-27	5.57752e-25	4.59016e-25	Ky/Ryr1/Ttn/Myl3/Myh7/Actn3/Acta1/Cacna1s/Myoz1/Tcap/Mylk2/Myl2/Lmod3/Trim72/Tnni1/Smyd1/Smtnl1/Vgll2/Des/Xirp2/Klhl41/Stac3/Jph2/Asb2/Tmem182/Tnnc1/Klhl40/Mylpf/Rbfox1/Six1/Myoz2/Crhr2/Actc1/Lbx1/Popdc3/Cavin4/Myf6/Myh6	38
	GO:0010927	cellular component assembly involved in morphogenesis	26/282	126/28943	4.1899e-27	1.02359e-24	8.4239e-25	Ttn/Tnnt3/Neb/Casq1/Myh7/Acta1/Myom2/Myoz1/Tcap/Myl2/Nrap/Lmod3/Mypn/Ldb3/Klhl41/Myoz2/Flnc/Actc1/Actn2/Tnnt1/Tmod4/Capn3/Ankrd23/Cavin4/Tmod1/Myh6	26
	GO:0060537	muscle tissue development	42/282	494/28943	5.53006e-27	1.22818e-24	1.01076e-24	Ryr1/Ttn/Myl3/Neb/Myh7/Actn3/Acta1/Cacna1s/Myoz1/Tcap/Mylk2/Myl2/Nrap/Lmod3/Tnni1/Myo18b/Smyd1/Alpk3/Vgll2/Xirp2/Klhl41/Stac3/Jph2/Asb2/Tnnc1/Klhl40/Mylpf/Rbfox1/Six1/Myoz2/Crhr2/Actc1/Actn2/Slc25a4/Popdc3/Cavin4/Myf6/Hamp2/Speg/Myh6/Alpk2/Fgf20	42
	GO:0003009	skeletal muscle contraction	18/282	42/28943	1.03859e-25	2.11439e-23	1.74009e-23	Scn4a/Tnnt3/Atp2a1/Casq1/Myh7/Actn3/Jsrp1/Tcap/Mylk2/Tnni2/Tnni1/Slc8a3/Tnnc2/Stac3/Tnnc1/Tnnt1/Kbtbd13/Chrne	18
	GO:0045214	sarcomere organization	18/282	49/28943	3.19262e-24	5.99967e-22	4.93757e-22	Ttn/Tnnt3/Neb/Casq1/Myh7/Myom2/Myoz1/Tcap/Mypn/Ldb3/Klhl41/Myoz2/Flnc/Actn2/Tnnt1/Capn3/Ankrd23/Myh6	18
	GO:0090257	regulation of muscle system process	30/282	258/28943	1.97297e-23	3.44283e-21	2.83336e-21	Scn4a/Ryr1/Ttn/Tnnt3/Myl3/Atp2a1/Casq1/Myh7/Actn3/Cacna1s/Mylk2/Tmem38a/Cmya5/Tnni2/Hrc/Tnni1/Slc8a3/Srl/Ucn/Cacng1/Prkag3/Tnnc2/Tnnc1/Atp1a2/Slc25a4/Tnnt1/Kbtbd13/Sln/Hamp2/Nppc	30
	GO:0031032	actomyosin structure organization	28/282	215/28943	2.6299e-23	4.28324e-21	3.52499e-21	Ttn/Tnnt3/Neb/Casq1/Myh7/Acta1/Myom2/Myoz1/Tcap/Myl2/Nrap/Lmod3/Myo18b/Mypn/Ldb3/Klhl41/Myoz2/Flnc/2310002L09Rik/Actc1/Actn2/Tnnt1/Tmod4/Capn3/Ankrd23/Cavin4/Tmod1/Myh6	28
	GO:0050879	multicellular organismal movement	18/282	59/28943	1.64033e-22	2.35726e-20	1.93996e-20	Scn4a/Tnnt3/Atp2a1/Casq1/Myh7/Actn3/Jsrp1/Tcap/Mylk2/Tnni2/Tnni1/Slc8a3/Tnnc2/Stac3/Tnnc1/Tnnt1/Kbtbd13/Chrne	18
	GO:0050881	musculoskeletal movement	18/282	59/28943	1.64033e-22	2.35726e-20	1.93996e-20	Scn4a/Tnnt3/Atp2a1/Casq1/Myh7/Actn3/Jsrp1/Tcap/Mylk2/Tnni2/Tnni1/Slc8a3/Tnnc2/Stac3/Tnnc1/Tnnt1/Kbtbd13/Chrne	18
	GO:0006937	regulation of muscle contraction	21/282	167/28943	1.9233e-17	2.61034e-15	2.14824e-15	Scn4a/Ryr1/Tnnt3/Myl3/Atp2a1/Casq1/Myh7/Actn3/Cacna1s/Mylk2/Tmem38a/Tnni2/Tnni1/Slc8a3/Ucn/Cacng1/Tnnc2/Tnnc1/Atp1a2/Tnnt1/Kbtbd13	21
	GO:0050905	neuromuscular process	22/282	194/28943	3.07141e-17	3.94919e-15	3.25008e-15	Scn4a/Tnnt3/Atp2a1/Casq1/Myh7/Actn3/Jsrp1/Tcap/Mylk2/Tnni2/Tnni1/Slc8a3/Ucn/Tnnc2/Stac3/Tnnc1/Rbfox1/Tnnt1/Camk2b/Kbtbd13/Chrne/Ptprq	22
	GO:0140694	non-membrane-bounded organelle assembly	28/282	379/28943	1.14174e-16	1.39463e-14	1.14775e-14	Ttn/Tnnt3/Neb/Casq1/Myh7/Acta1/Myom2/Fitm1/Myoz1/Tcap/Myl2/Nrap/Lmod3/Mypn/Ldb3/Klhl41/Asb2/Myoz2/Flnc/Actc1/Actn2/Tnnt1/Tmod4/Capn3/Ankrd23/Cavin4/Tmod1/Myh6	28
	GO:0048738	cardiac muscle tissue development	24/282	271/28943	3.26413e-16	3.79727e-14	3.12506e-14	Ttn/Myl3/Neb/Myh7/Tcap/Mylk2/Myl2/Nrap/Tnni1/Myo18b/Alpk3/Xirp2/Jph2/Asb2/Tnnc1/Actc1/Actn2/Slc25a4/Cavin4/Hamp2/Speg/Myh6/Alpk2/Fgf20	24
	GO:0014706	striated muscle tissue development	24/282	291/28943	1.63338e-15	1.81379e-13	1.4927e-13	Ttn/Myl3/Neb/Myh7/Tcap/Mylk2/Myl2/Nrap/Tnni1/Myo18b/Alpk3/Xirp2/Jph2/Asb2/Tnnc1/Actc1/Actn2/Slc25a4/Cavin4/Hamp2/Speg/Myh6/Alpk2/Fgf20	24
	GO:0060538	skeletal muscle organ development	21/282	219/28943	5.01586e-15	5.32772e-13	4.38457e-13	Ryr1/Actn3/Acta1/Cacna1s/Myoz1/Mylk2/Lmod3/Smyd1/Vgll2/Des/Klhl41/Stac3/Asb2/Klhl40/Mylpf/Rbfox1/Six1/Myoz2/Crhr2/Popdc3/Myf6	21
	GO:0055013	cardiac muscle cell development	16/282	104/28943	5.30214e-15	5.39714e-13	4.44171e-13	Ttn/Neb/Tcap/Myl2/Nrap/Myo18b/Alpk3/Asb2/Actc1/Actn2/Slc25a4/Cavin4/Hamp2/Speg/Myh6/Alpk2	16
	GO:0043501	skeletal muscle adaptation	10/282	23/28943	6.72421e-15	6.5709e-13	5.40768e-13	Myh7/Actn3/Cacna1s/Myoz1/Cmya5/Tnni1/Asb2/Tnnc1/Myoz2/Tnnt1	10
	GO:0055006	cardiac cell development	16/282	110/28943	1.32388e-14	1.24394e-12	1.02373e-12	Ttn/Neb/Tcap/Myl2/Nrap/Myo18b/Alpk3/Asb2/Actc1/Actn2/Slc25a4/Cavin4/Hamp2/Speg/Myh6/Alpk2	16
	GO:0007519	skeletal muscle tissue development	20/282	207/28943	1.96969e-14	1.78221e-12	1.46671e-12	Ryr1/Actn3/Acta1/Cacna1s/Myoz1/Mylk2/Lmod3/Smyd1/Vgll2/Klhl41/Stac3/Asb2/Klhl40/Mylpf/Rbfox1/Six1/Myoz2/Crhr2/Popdc3/Myf6	20
	GO:0006816	calcium ion transport	27/282	449/28943	6.26616e-14	5.46723e-12	4.49939e-12	Ryr1/Atp2a1/Casq1/Trdn/Cacna1s/Ccl19/Dhrs7c/Jsrp1/Tmem38a/Hrc/Camk2a/Cacng6/Slc8a3/Srl/Ucn/Cacng1/Stac3/Jph2/Crhr2/Atp1a2/Camk2b/Capn3/Sln/Casr/Atp2b3/Gck/Ccl21b	27
	GO:0014888	striated muscle adaptation	12/282	51/28943	6.55603e-14	5.52289e-12	4.54519e-12	Myh7/Actn3/Cacna1s/Myoz1/Tcap/Cmya5/Tnni1/Asb2/Tnnc1/Myoz2/Tnnt1/Myh6	12
	GO:0055007	cardiac muscle cell differentiation	17/282	150/28943	1.34189e-13	1.09275e-11	8.99305e-12	Ttn/Neb/Tcap/Mylk2/Myl2/Nrap/Myo18b/Alpk3/Asb2/Actc1/Actn2/Slc25a4/Cavin4/Hamp2/Speg/Myh6/Alpk2	17
	GO:0043500	muscle adaptation	16/282	128/28943	1.51375e-13	1.19293e-11	9.8175e-12	Myh7/Actn3/Cacna1s/Myoz1/Tcap/Cmya5/Tnni1/Srl/Prkag3/Asb2/Tnnc1/Myoz2/Slc25a4/Tnnt1/Hamp2/Myh6	16
	GO:0060048	cardiac muscle contraction	16/282	132/28943	2.46712e-13	1.88349e-11	1.55007e-11	Ttn/Myl3/Myh7/Tcap/Myl2/Tmem38a/Tnni2/Tnni1/Myl1/Scn4b/Ucn/Tnnc1/Actc1/Atp1a2/Scn1b/Myh6	16
	GO:0014819	regulation of skeletal muscle contraction	8/282	15/28943	4.4608e-13	3.30234e-11	2.71774e-11	Scn4a/Atp2a1/Casq1/Myh7/Actn3/Mylk2/Slc8a3/Kbtbd13	8
	GO:0006942	regulation of striated muscle contraction	13/282	87/28943	2.90969e-12	2.09069e-10	1.72059e-10	Scn4a/Tnnt3/Myl3/Atp2a1/Casq1/Myh7/Actn3/Mylk2/Tmem38a/Slc8a3/Ucn/Atp1a2/Kbtbd13	13
	GO:0060047	heart contraction	19/282	242/28943	3.71479e-12	2.59292e-10	2.13391e-10	Ttn/Myl3/Trdn/Myh7/Tcap/Myl2/Tmem38a/Tnni2/Hrc/Tnni1/Myl1/Scn4b/Ucn/Tnnc1/Crhr2/Actc1/Atp1a2/Scn1b/Myh6	19
	GO:0014904	myotube cell development	11/282	54/28943	4.08218e-12	2.77021e-10	2.27981e-10	Ryr1/Actn3/Acta1/Cacna1s/Lmod3/Klhl41/Stac3/Tmem182/Klhl40/Six1/Myf6	11
	GO:0035051	cardiocyte differentiation	17/282	186/28943	4.58793e-12	3.02927e-10	2.49301e-10	Ttn/Neb/Tcap/Mylk2/Myl2/Nrap/Myo18b/Alpk3/Asb2/Actc1/Actn2/Slc25a4/Cavin4/Hamp2/Speg/Myh6/Alpk2	17
	GO:0048644	muscle organ morphogenesis	13/282	94/28943	8.06132e-12	5.18258e-10	4.26513e-10	Ttn/Myl3/Myh7/Tcap/Mylk2/Myl2/Tnni1/Smtnl1/Xirp2/Tnnc1/Actc1/Myf6/Myh6	13
	GO:0003015	heart process	19/282	254/28943	8.69442e-12	5.44627e-10	4.48214e-10	Ttn/Myl3/Trdn/Myh7/Tcap/Myl2/Tmem38a/Tnni2/Hrc/Tnni1/Myl1/Scn4b/Ucn/Tnnc1/Crhr2/Actc1/Atp1a2/Scn1b/Myh6	19
	GO:0070296	sarcoplasmic reticulum calcium ion transport	9/282	32/28943	1.6057e-11	9.80684e-10	8.07078e-10	Ryr1/Atp2a1/Casq1/Trdn/Dhrs7c/Tmem38a/Hrc/Cacng1/Sln	9
	GO:0010959	regulation of metal ion transport	24/282	458/28943	2.95048e-11	1.75805e-09	1.44683e-09	Casq1/Trdn/Dhrs7c/Jsrp1/Tmem38a/Lrrc38/Hrc/Camk2a/Cacng6/Scn4b/Ucn/Cacng1/Stac3/Jph2/Crhr2/Atp1a2/Actn2/Scn1b/Capn3/Sln/Hamp2/Casr/Vip/Gck	24
	GO:0048741	skeletal muscle fiber development	10/282	48/28943	3.10258e-11	1.80466e-09	1.48519e-09	Ryr1/Actn3/Acta1/Cacna1s/Lmod3/Klhl41/Stac3/Klhl40/Six1/Myf6	10
	GO:0060415	muscle tissue morphogenesis	12/282	86/28943	4.66635e-11	2.65114e-09	2.18182e-09	Ttn/Myl3/Myh7/Tcap/Mylk2/Myl2/Tnni1/Xirp2/Tnnc1/Actc1/Myf6/Myh6	12
	GO:0070588	calcium ion transmembrane transport	20/282	325/28943	8.31875e-11	4.61879e-09	3.80115e-09	Ryr1/Atp2a1/Casq1/Trdn/Cacna1s/Ccl19/Dhrs7c/Jsrp1/Tmem38a/Hrc/Cacng6/Slc8a3/Cacng1/Stac3/Jph2/Atp1a2/Capn3/Sln/Atp2b3/Ccl21b	20
	GO:0055008	cardiac muscle tissue morphogenesis	11/282	72/28943	1.10384e-10	5.99265e-09	4.9318e-09	Ttn/Myl3/Myh7/Tcap/Mylk2/Myl2/Tnni1/Xirp2/Tnnc1/Actc1/Myh6	11
	GO:0014902	myotube differentiation	14/282	143/28943	1.45663e-10	7.736e-09	6.36653e-09	Ryr1/Actn3/Acta1/Cacna1s/Lmod3/Trim72/Plpp7/Smyd1/Klhl41/Stac3/Tmem182/Klhl40/Six1/Myf6	14
	GO:0006875	cellular metal ion homeostasis	22/282	425/28943	2.55509e-10	1.3281e-08	1.093e-08	Ryr1/Sypl2/Atp2a1/Casq1/Trdn/Pygm/Ccl19/Dhrs7c/Jsrp1/Tmem38a/Hrc/Slc8a3/Jph2/Atp1a2/Ankrd9/Capn3/Hamp2/Casr/Atp2b3/Ccl21b/Slc30a3/Prn	22
	GO:0055003	cardiac myofibril assembly	7/282	19/28943	3.52772e-10	1.79546e-08	1.47762e-08	Ttn/Neb/Tcap/Myl2/Nrap/Actc1/Cavin4	7
	GO:0030003	cellular cation homeostasis	23/282	498/28943	9.08492e-10	4.52948e-08	3.72765e-08	Ryr1/Sypl2/Atp2a1/Casq1/Trdn/Pygm/Ccl19/Dhrs7c/Jsrp1/Tmem38a/Hrc/Slc8a3/Jph2/Atp1a2/Ankrd9/Capn3/Slc9a2/Hamp2/Casr/Atp2b3/Ccl21b/Slc30a3/Prn	23
	GO:0051651	maintenance of location in cell	16/282	232/28943	1.30247e-09	6.36389e-08	5.23731e-08	Ryr1/Atp2a1/Casq1/Trdn/Ccl19/Dhrs7c/Jsrp1/Tmem38a/Hrc/Jph2/Chchd10/Capn3/Hk2/Tmsb15a/Ccl21b/Slc30a3	16
	GO:0009150	purine ribonucleotide metabolic process	21/282	425/28943	1.52124e-09	7.28703e-08	5.99704e-08	Myh7/Actn3/Eno3/Mlxipl/Pfkm/Ampd1/Pgam2/Adssl1/Gpd1/Ak1/Prkag3/Aldoa/Acss2/Atp1a2/Nt5c1a/Hk2/Acsl6/Gmpr/Nppc/Myh6/Gck	21
	GO:0072503	cellular divalent inorganic cation homeostasis	18/282	320/28943	3.11229e-09	1.46218e-07	1.20333e-07	Ryr1/Sypl2/Atp2a1/Casq1/Trdn/Pygm/Ccl19/Dhrs7c/Jsrp1/Tmem38a/Hrc/Slc8a3/Jph2/Capn3/Casr/Atp2b3/Ccl21b/Slc30a3	18
	GO:0009259	ribonucleotide metabolic process	21/282	445/28943	3.43588e-09	1.58375e-07	1.30338e-07	Myh7/Actn3/Eno3/Mlxipl/Pfkm/Ampd1/Pgam2/Adssl1/Gpd1/Ak1/Prkag3/Aldoa/Acss2/Atp1a2/Nt5c1a/Hk2/Acsl6/Gmpr/Nppc/Myh6/Gck	21
	GO:0014733	regulation of skeletal muscle adaptation	6/282	15/28943	3.77175e-09	1.70637e-07	1.4043e-07	Myh7/Actn3/Cmya5/Tnni1/Tnnc1/Tnnt1	6
	GO:0006163	purine nucleotide metabolic process	21/282	449/28943	4.0219e-09	1.78645e-07	1.47021e-07	Myh7/Actn3/Eno3/Mlxipl/Pfkm/Ampd1/Pgam2/Adssl1/Gpd1/Ak1/Prkag3/Aldoa/Acss2/Atp1a2/Nt5c1a/Hk2/Acsl6/Gmpr/Nppc/Myh6/Gck	21
	GO:0016052	carbohydrate catabolic process	13/282	154/28943	4.16164e-09	1.81552e-07	1.49412e-07	Actn3/Pygm/Eno3/Mlxipl/Pfkm/Pgam2/Gpd1/Prkag3/Aldoa/Ppp1r3c/Hk2/Aldh1a7/Gck	13
	GO:0046031	ADP metabolic process	11/282	101/28943	4.52333e-09	1.93868e-07	1.59549e-07	Actn3/Eno3/Mlxipl/Pfkm/Pgam2/Gpd1/Ak1/Prkag3/Aldoa/Hk2/Gck	11
	GO:0006874	cellular calcium ion homeostasis	17/282	292/28943	5.15598e-09	2.17174e-07	1.78728e-07	Ryr1/Sypl2/Atp2a1/Casq1/Trdn/Pygm/Ccl19/Dhrs7c/Jsrp1/Tmem38a/Hrc/Slc8a3/Jph2/Capn3/Casr/Atp2b3/Ccl21b	17
	GO:0019693	ribose phosphate metabolic process	21/282	456/28943	5.27598e-09	2.18461e-07	1.79788e-07	Myh7/Actn3/Eno3/Mlxipl/Pfkm/Ampd1/Pgam2/Adssl1/Gpd1/Ak1/Prkag3/Aldoa/Acss2/Atp1a2/Nt5c1a/Hk2/Acsl6/Gmpr/Nppc/Myh6/Gck	21
	GO:0051924	regulation of calcium ion transport	17/282	296/28943	6.31682e-09	2.572e-07	2.11669e-07	Casq1/Trdn/Dhrs7c/Jsrp1/Tmem38a/Hrc/Camk2a/Cacng6/Ucn/Cacng1/Stac3/Jph2/Crhr2/Atp1a2/Capn3/Sln/Casr	17
	GO:0009135	purine nucleoside diphosphate metabolic process	11/282	105/28943	6.85083e-09	2.69945e-07	2.22158e-07	Actn3/Eno3/Mlxipl/Pfkm/Pgam2/Gpd1/Ak1/Prkag3/Aldoa/Hk2/Gck	11
	GO:0009179	purine ribonucleoside diphosphate metabolic process	11/282	105/28943	6.85083e-09	2.69945e-07	2.22158e-07	Actn3/Eno3/Mlxipl/Pfkm/Pgam2/Gpd1/Ak1/Prkag3/Aldoa/Hk2/Gck	11
	GO:0051235	maintenance of location	18/282	341/28943	8.39259e-09	3.25446e-07	2.67834e-07	Ryr1/Atp2a1/Casq1/Trdn/Cidea/Ccl19/Fitm1/Dhrs7c/Jsrp1/Tmem38a/Hrc/Jph2/Chchd10/Capn3/Hk2/Tmsb15a/Ccl21b/Slc30a3	18
	GO:0006165	nucleoside diphosphate phosphorylation	11/282	109/28943	1.01943e-08	3.89135e-07	3.20248e-07	Actn3/Eno3/Mlxipl/Pfkm/Pgam2/Gpd1/Ak1/Prkag3/Aldoa/Hk2/Gck	11
	GO:0072521	purine-containing compound metabolic process	21/282	483/28943	1.43378e-08	5.38882e-07	4.43486e-07	Myh7/Actn3/Eno3/Mlxipl/Pfkm/Ampd1/Pgam2/Adssl1/Gpd1/Ak1/Prkag3/Aldoa/Acss2/Atp1a2/Nt5c1a/Hk2/Acsl6/Gmpr/Nppc/Myh6/Gck	21
	GO:0046939	nucleotide phosphorylation	11/282	113/28943	1.49238e-08	5.52408e-07	4.54618e-07	Actn3/Eno3/Mlxipl/Pfkm/Pgam2/Gpd1/Ak1/Prkag3/Aldoa/Hk2/Gck	11
	GO:0072507	divalent inorganic cation homeostasis	18/282	359/28943	1.85411e-08	6.7606e-07	5.5638e-07	Ryr1/Sypl2/Atp2a1/Casq1/Trdn/Pygm/Ccl19/Dhrs7c/Jsrp1/Tmem38a/Hrc/Slc8a3/Jph2/Capn3/Casr/Atp2b3/Ccl21b/Slc30a3	18
	GO:0014883	transition between fast and slow fiber	5/282	10/28943	2.05216e-08	7.37269e-07	6.06753e-07	Myh7/Actn3/Tnni1/Tnnc1/Tnnt1	5
	GO:0009185	ribonucleoside diphosphate metabolic process	11/282	117/28943	2.15195e-08	7.61916e-07	6.27037e-07	Actn3/Eno3/Mlxipl/Pfkm/Pgam2/Gpd1/Ak1/Prkag3/Aldoa/Hk2/Gck	11
	GO:0003007	heart morphogenesis	16/282	283/28943	2.21461e-08	7.72898e-07	6.36076e-07	Ryr1/Ttn/Myl3/Myh7/Tcap/Mylk2/Myl2/Tnni1/Xirp2/Asb2/Tnnc1/Six1/Actc1/Lbx1/Myh6/Alpk2	16
	GO:0006096	glycolytic process	10/282	92/28943	2.34683e-08	8.07508e-07	6.64558e-07	Actn3/Eno3/Mlxipl/Pfkm/Pgam2/Gpd1/Prkag3/Aldoa/Hk2/Gck	10
	GO:0055074	calcium ion homeostasis	17/282	324/28943	2.39865e-08	8.13877e-07	6.698e-07	Ryr1/Sypl2/Atp2a1/Casq1/Trdn/Pygm/Ccl19/Dhrs7c/Jsrp1/Tmem38a/Hrc/Slc8a3/Jph2/Capn3/Casr/Atp2b3/Ccl21b	17
	GO:0006757	ATP generation from ADP	10/282	93/28943	2.60719e-08	8.72515e-07	7.18058e-07	Actn3/Eno3/Mlxipl/Pfkm/Pgam2/Gpd1/Prkag3/Aldoa/Hk2/Gck	10
	GO:0051209	release of sequestered calcium ion into cytosol	11/282	120/28943	2.80552e-08	9.26201e-07	7.62239e-07	Ryr1/Casq1/Trdn/Ccl19/Dhrs7c/Jsrp1/Tmem38a/Hrc/Jph2/Capn3/Ccl21b	11
	GO:1904062	regulation of cation transmembrane transport	19/282	414/28943	3.04598e-08	9.83523e-07	8.09414e-07	Casq1/Trdn/Dhrs7c/Jsrp1/Tmem38a/Lrrc38/Hrc/Cacng6/Scn4b/Cacng1/Stac3/Jph2/Atp1a2/Actn2/Scn1b/Slc25a4/Capn3/Sln/Hamp2	19
	GO:0051283	negative regulation of sequestering of calcium ion	11/282	121/28943	3.05967e-08	9.83523e-07	8.09414e-07	Ryr1/Casq1/Trdn/Ccl19/Dhrs7c/Jsrp1/Tmem38a/Hrc/Jph2/Capn3/Ccl21b	11
	GO:0051282	regulation of sequestering of calcium ion	11/282	123/28943	3.63024e-08	1.15178e-06	9.47883e-07	Ryr1/Casq1/Trdn/Ccl19/Dhrs7c/Jsrp1/Tmem38a/Hrc/Jph2/Capn3/Ccl21b	11
	GO:0097553	calcium ion transmembrane import into cytosol	13/282	185/28943	3.77643e-08	1.1828e-06	9.73412e-07	Ryr1/Casq1/Trdn/Cacna1s/Ccl19/Dhrs7c/Jsrp1/Tmem38a/Hrc/Slc8a3/Jph2/Capn3/Ccl21b	13
	GO:0051208	sequestering of calcium ion	11/282	125/28943	4.29361e-08	1.32776e-06	1.09271e-06	Ryr1/Casq1/Trdn/Ccl19/Dhrs7c/Jsrp1/Tmem38a/Hrc/Jph2/Capn3/Ccl21b	11
	GO:0046034	ATP metabolic process	14/282	224/28943	4.92707e-08	1.5046e-06	1.23825e-06	Myh7/Actn3/Eno3/Mlxipl/Pfkm/Pgam2/Gpd1/Ak1/Prkag3/Aldoa/Atp1a2/Hk2/Myh6/Gck	14
	GO:0043502	regulation of muscle adaptation	10/282	101/28943	5.7899e-08	1.74626e-06	1.43713e-06	Myh7/Actn3/Cmya5/Tnni1/Srl/Prkag3/Tnnc1/Slc25a4/Tnnt1/Hamp2	10
	GO:0090075	relaxation of muscle	7/282	37/28943	6.20405e-08	1.84835e-06	1.52115e-06	Ttn/Atp2a1/Actn3/Hrc/Kbtbd13/Sln/Nppc	7
	GO:0033275	actin-myosin filament sliding	5/282	12/28943	6.34728e-08	1.86824e-06	1.53751e-06	Myh7/Mylk2/Tnnc1/Actc1/Myh6	5
	GO:1903169	regulation of calcium ion transmembrane transport	13/282	201/28943	1.00131e-07	2.91214e-06	2.39662e-06	Casq1/Trdn/Dhrs7c/Jsrp1/Tmem38a/Hrc/Cacng6/Cacng1/Stac3/Jph2/Atp1a2/Capn3/Sln	13
	GO:0009132	nucleoside diphosphate metabolic process	11/282	136/28943	1.02577e-07	2.94818e-06	2.42628e-06	Actn3/Eno3/Mlxipl/Pfkm/Pgam2/Gpd1/Ak1/Prkag3/Aldoa/Hk2/Gck	11
	GO:0014808	release of sequestered calcium ion into cytosol by sarcoplasmic reticulum	6/282	25/28943	1.22963e-07	3.49301e-06	2.87466e-06	Ryr1/Casq1/Trdn/Dhrs7c/Tmem38a/Hrc	6
	GO:1903514	release of sequestered calcium ion into cytosol by endoplasmic reticulum	6/282	26/28943	1.58549e-07	4.45212e-06	3.66398e-06	Ryr1/Casq1/Trdn/Dhrs7c/Tmem38a/Hrc	6
	GO:0009205	purine ribonucleoside triphosphate metabolic process	14/282	251/28943	2.0078e-07	5.57393e-06	4.5872e-06	Myh7/Actn3/Eno3/Mlxipl/Pfkm/Pgam2/Gpd1/Ak1/Prkag3/Aldoa/Atp1a2/Hk2/Myh6/Gck	14
	GO:0009144	purine nucleoside triphosphate metabolic process	14/282	257/28943	2.67671e-07	7.26579e-06	5.97955e-06	Myh7/Actn3/Eno3/Mlxipl/Pfkm/Pgam2/Gpd1/Ak1/Prkag3/Aldoa/Atp1a2/Hk2/Myh6/Gck	14
	GO:0009199	ribonucleoside triphosphate metabolic process	14/282	257/28943	2.67671e-07	7.26579e-06	5.97955e-06	Myh7/Actn3/Eno3/Mlxipl/Pfkm/Pgam2/Gpd1/Ak1/Prkag3/Aldoa/Atp1a2/Hk2/Myh6/Gck	14
	GO:0006090	pyruvate metabolic process	10/282	121/28943	3.21403e-07	8.62845e-06	7.10099e-06	Actn3/Eno3/Mlxipl/Pfkm/Pgam2/Gpd1/Prkag3/Aldoa/Hk2/Gck	10
	GO:1903522	regulation of blood circulation	14/282	268/28943	4.44226e-07	1.17961e-05	9.70792e-06	Myl3/Myh7/Myl2/Tmem38a/Hrc/Smtnl1/Scn4b/Ucn/Smtnl2/Crhr2/Atp1a2/Scn1b/Casr/Myh6	14
	GO:0070252	actin-mediated cell contraction	9/282	97/28943	4.7084e-07	1.23684e-05	1.01789e-05	Myh2/Myh7/Mylk2/Scn4b/Tnnc1/Actc1/Atp1a2/Scn1b/Myh6	9
	GO:0009141	nucleoside triphosphate metabolic process	14/282	275/28943	6.05263e-07	1.57304e-05	1.29457e-05	Myh7/Actn3/Eno3/Mlxipl/Pfkm/Pgam2/Gpd1/Ak1/Prkag3/Aldoa/Atp1a2/Hk2/Myh6/Gck	14
	GO:1901077	regulation of relaxation of muscle	5/282	18/28943	6.54505e-07	1.68311e-05	1.38516e-05	Ttn/Actn3/Hrc/Sln/Nppc	5
	GO:0006091	generation of precursor metabolites and energy	18/282	465/28943	8.5841e-07	2.18447e-05	1.79777e-05	Actn3/Pygm/Eno3/Mlxipl/Cox7a1/Pfkm/Cox6a2/Pgam2/Gpd1/Ucn/Prkag3/Aldoa/Chchd10/Ppp1r3a/Ppp1r3c/Hk2/Gys2/Gck	18
	GO:0019320	hexose catabolic process	6/282	36/28943	1.236e-06	3.11294e-05	2.56187e-05	Actn3/Eno3/Pfkm/Pgam2/Aldoa/Aldh1a7	6
	GO:0051279	regulation of release of sequestered calcium ion into cytosol	8/282	82/28943	1.40488e-06	3.50216e-05	2.88219e-05	Casq1/Trdn/Dhrs7c/Jsrp1/Tmem38a/Hrc/Jph2/Capn3	8
	GO:0046365	monosaccharide catabolic process	6/282	38/28943	1.72343e-06	4.25288e-05	3.50001e-05	Actn3/Eno3/Pfkm/Pgam2/Aldoa/Aldh1a7	6
	GO:0030049	muscle filament sliding	4/282	10/28943	1.76915e-06	4.32203e-05	3.55692e-05	Myh7/Mylk2/Tnnc1/Myh6	4
	GO:0022898	regulation of transmembrane transporter activity	14/282	303/28943	1.90535e-06	4.60869e-05	3.79283e-05	Casq1/Trdn/Jsrp1/Lrrc38/Hrc/Scn4b/Stac3/Jph2/Atp1a2/Actn2/Scn1b/Slc25a4/Sln/Hamp2	14
	GO:0006734	NADH metabolic process	6/282	39/28943	2.02021e-06	4.79163e-05	3.94339e-05	Actn3/Eno3/Pfkm/Pgam2/Gpd1/Aldoa	6
	GO:0014823	response to activity	6/282	39/28943	2.02021e-06	4.79163e-05	3.94339e-05	Myh2/Myh4/Smtnl1/Srl/Prkag3/Capn3	6
	GO:0010880	regulation of release of sequestered calcium ion into cytosol by sarcoplasmic reticulum	5/282	23/28943	2.46983e-06	5.80174e-05	4.77468e-05	Casq1/Trdn/Dhrs7c/Tmem38a/Hrc	5
	GO:0006007	glucose catabolic process	5/282	24/28943	3.095e-06	7.20102e-05	5.92626e-05	Actn3/Eno3/Pfkm/Pgam2/Aldoa	5
	GO:0032409	regulation of transporter activity	14/282	317/28943	3.22075e-06	7.42291e-05	6.10886e-05	Casq1/Trdn/Jsrp1/Lrrc38/Hrc/Scn4b/Stac3/Jph2/Atp1a2/Actn2/Scn1b/Slc25a4/Sln/Hamp2	14
	GO:0035914	skeletal muscle cell differentiation	8/282	94/28943	3.96708e-06	9.05754e-05	7.45413e-05	Mylk2/Smyd1/Klhl41/Asb2/Klhl40/Rbfox1/Six1/Myf6	8
	GO:0010830	regulation of myotube differentiation	6/282	44/28943	4.19607e-06	9.49167e-05	7.8114e-05	Actn3/Lmod3/Trim72/Plpp7/Smyd1/Myf6	6
	GO:0008016	regulation of heart contraction	11/282	199/28943	4.49787e-06	0.00010081	8.2964e-05	Myl3/Myh7/Myl2/Tmem38a/Hrc/Scn4b/Ucn/Crhr2/Atp1a2/Scn1b/Myh6	11
	GO:0030048	actin filament-based movement	9/282	128/28943	4.8295e-06	0.000107259	8.82712e-05	Myh2/Myh7/Mylk2/Scn4b/Tnnc1/Actc1/Atp1a2/Scn1b/Myh6	9
	GO:0006813	potassium ion transport	12/282	244/28943	5.52271e-06	0.000121549	0.000100032	Scn4a/Kcna7/Tmem38a/Lrrc38/Kcnc4/Atp1a2/Actn2/Slc9a2/Kcng4/Atp1b4/Vip/Gck	12
	GO:1901019	regulation of calcium ion transmembrane transporter activity	8/282	99/28943	5.85061e-06	0.000127616	0.000105025	Casq1/Trdn/Jsrp1/Hrc/Stac3/Jph2/Atp1a2/Sln	8
	GO:0015980	energy derivation by oxidation of organic compounds	14/282	337/28943	6.49325e-06	0.000140381	0.00011553	Actn3/Pygm/Mlxipl/Cox7a1/Pfkm/Cox6a2/Gpd1/Ucn/Prkag3/Chchd10/Ppp1r3a/Ppp1r3c/Gys2/Gck	14
	GO:0032412	regulation of ion transmembrane transporter activity	13/282	293/28943	6.89009e-06	0.000147654	0.000121515	Casq1/Trdn/Jsrp1/Lrrc38/Hrc/Scn4b/Stac3/Jph2/Atp1a2/Actn2/Scn1b/Sln/Hamp2	13
	GO:0043270	positive regulation of ion transport	14/282	343/28943	7.93136e-06	0.00016849	0.000138663	Casq1/Trdn/Lrrc38/Slc38a3/Camk2a/Scn4b/Ucn/Stac3/Jph2/Crhr2/Actn2/Scn1b/Capn3/Casr	14
	GO:0045989	positive regulation of striated muscle contraction	4/282	14/28943	8.17725e-06	0.000172216	0.000141729	Atp2a1/Actn3/Mylk2/Ucn	4
	GO:0051153	regulation of striated muscle cell differentiation	8/282	104/28943	8.44085e-06	0.000176248	0.000145047	Actn3/Lmod3/Trim72/Plpp7/Smyd1/Slc25a4/Myf6/Hamp2	8
	GO:0002026	regulation of the force of heart contraction	5/282	31/28943	1.17008e-05	0.000242246	0.000199362	Myl3/Myh7/Myl2/Atp1a2/Myh6	5
	GO:0019932	second-messenger-mediated signaling	13/282	309/28943	1.21526e-05	0.000249486	0.000205321	3425401B19Rik/Casq1/Actn3/Myoz1/Tmem38a/Cmya5/Ucn/Mafa/Myoz2/Crhr2/Nppc/Gck/Treml1	13
	GO:0007015	actin filament organization	16/282	460/28943	1.33858e-05	0.000268221	0.000220739	Ttn/Neb/Acta1/Tcap/Nrap/Lmod3/Xirp2/Crhr2/Actc1/Actn2/Tpm2/Tmod4/Kbtbd13/Tmsb15a/Tmod1/Ccl21b	16
	GO:0005977	glycogen metabolic process	7/282	80/28943	1.33946e-05	0.000268221	0.000220739	Pygm/Pfkm/Prkag3/Ppp1r3a/Ppp1r3c/Gys2/Gck	7
	GO:0006073	cellular glucan metabolic process	7/282	80/28943	1.33946e-05	0.000268221	0.000220739	Pygm/Pfkm/Prkag3/Ppp1r3a/Ppp1r3c/Gys2/Gck	7
	GO:0044042	glucan metabolic process	7/282	81/28943	1.45407e-05	0.000283869	0.000233617	Pygm/Pfkm/Prkag3/Ppp1r3a/Ppp1r3c/Gys2/Gck	7
	GO:0007512	adult heart development	4/282	16/28943	1.46408e-05	0.000283869	0.000233617	Ttn/Myh7/Tcap/Myh6	4
	GO:0070885	negative regulation of calcineurin-NFAT signaling cascade	4/282	16/28943	1.46408e-05	0.000283869	0.000233617	Actn3/Myoz1/Cmya5/Myoz2	4
	GO:0106057	negative regulation of calcineurin-mediated signaling	4/282	16/28943	1.46408e-05	0.000283869	0.000233617	Actn3/Myoz1/Cmya5/Myoz2	4
	GO:0045933	positive regulation of muscle contraction	6/282	55/28943	1.57534e-05	0.000300668	0.000247442	Atp2a1/Actn3/Cacna1s/Mylk2/Ucn/Cacng1	6
	GO:0055010	ventricular cardiac muscle tissue morphogenesis	6/282	55/28943	1.57534e-05	0.000300668	0.000247442	Myl3/Myh7/Myl2/Tnni1/Tnnc1/Myh6	6
	GO:0006735	NADH regeneration	4/282	17/28943	1.8999e-05	0.00035431	0.000291588	Eno3/Pfkm/Pgam2/Aldoa	4
	GO:0061621	canonical glycolysis	4/282	17/28943	1.8999e-05	0.00035431	0.000291588	Eno3/Pfkm/Pgam2/Aldoa	4
	GO:0061718	glucose catabolic process to pyruvate	4/282	17/28943	1.8999e-05	0.00035431	0.000291588	Eno3/Pfkm/Pgam2/Aldoa	4
	GO:0051155	positive regulation of striated muscle cell differentiation	6/282	58/28943	2.14637e-05	0.000397242	0.00032692	Actn3/Lmod3/Smyd1/Slc25a4/Myf6/Hamp2	6
	GO:0006112	energy reserve metabolic process	7/282	90/28943	2.9e-05	0.000532684	0.000438385	Pygm/Pfkm/Prkag3/Ppp1r3a/Ppp1r3c/Gys2/Gck	7
	GO:0009167	purine ribonucleoside monophosphate metabolic process	5/282	39/28943	3.72029e-05	0.000678258	0.000558189	Ampd1/Adssl1/Ak1/Nt5c1a/Gmpr	5
	GO:0060314	regulation of ryanodine-sensitive calcium-release channel activity	4/282	20/28943	3.77954e-05	0.000678928	0.00055874	Trdn/Jsrp1/Hrc/Jph2	4
	GO:0061620	glycolytic process through glucose-6-phosphate	4/282	20/28943	3.77954e-05	0.000678928	0.00055874	Eno3/Pfkm/Pgam2/Aldoa	4
	GO:0003229	ventricular cardiac muscle tissue development	6/282	65/28943	4.13751e-05	0.000737806	0.000607195	Myl3/Myh7/Myl2/Tnni1/Tnnc1/Myh6	6
	GO:0009126	purine nucleoside monophosphate metabolic process	5/282	42/28943	5.36709e-05	0.00095013	0.000781933	Ampd1/Adssl1/Ak1/Nt5c1a/Gmpr	5
	GO:0050849	negative regulation of calcium-mediated signaling	4/282	22/28943	5.61942e-05	0.000987644	0.000812806	Actn3/Myoz1/Cmya5/Myoz2	4
	GO:0070884	regulation of calcineurin-NFAT signaling cascade	5/282	43/28943	6.02521e-05	0.0010514	0.000865275	3425401B19Rik/Actn3/Myoz1/Cmya5/Myoz2	5
	GO:0044264	cellular polysaccharide metabolic process	7/282	101/28943	6.09562e-05	0.00105614	0.000869178	Pygm/Pfkm/Prkag3/Ppp1r3a/Ppp1r3c/Gys2/Gck	7
	GO:0005978	glycogen biosynthetic process	5/282	44/28943	6.74388e-05	0.00113734	0.000935999	Prkag3/Ppp1r3a/Ppp1r3c/Gys2/Gck	5
	GO:0009250	glucan biosynthetic process	5/282	44/28943	6.74388e-05	0.00113734	0.000935999	Prkag3/Ppp1r3a/Ppp1r3c/Gys2/Gck	5
	GO:0106056	regulation of calcineurin-mediated signaling	5/282	44/28943	6.74388e-05	0.00113734	0.000935999	3425401B19Rik/Actn3/Myoz1/Cmya5/Myoz2	5
	GO:0061615	glycolytic process through fructose-6-phosphate	4/282	23/28943	6.75046e-05	0.00113734	0.000935999	Eno3/Pfkm/Pgam2/Aldoa	4
	GO:0043462	regulation of ATP-dependent activity	6/282	72/28943	7.3932e-05	0.00123709	0.0010181	Tnnt3/Tnnc1/Tpm2/Sln/Casr/Myh6	6
	GO:0046040	IMP metabolic process	4/282	24/28943	8.03866e-05	0.00133595	0.00109945	Ampd1/Adssl1/Nt5c1a/Gmpr	4
	GO:0033173	calcineurin-NFAT signaling cascade	5/282	49/28943	0.000113804	0.00187854	0.00154599	3425401B19Rik/Actn3/Myoz1/Cmya5/Myoz2	5
	GO:0051928	positive regulation of calcium ion transport	8/282	151/28943	0.000122771	0.00201294	0.0016566	Casq1/Trdn/Camk2a/Ucn/Stac3/Jph2/Capn3/Casr	8
	GO:0005976	polysaccharide metabolic process	7/282	113/28943	0.000123962	0.00201893	0.00166153	Pygm/Pfkm/Prkag3/Ppp1r3a/Ppp1r3c/Gys2/Gck	7
	GO:0003231	cardiac ventricle development	8/282	152/28943	0.000128514	0.0020792	0.00171113	Myl3/Myh7/Myl2/Tnni1/Xirp2/Tnnc1/Sall4/Myh6	8
	GO:0051149	positive regulation of muscle cell differentiation	6/282	80/28943	0.00013325	0.00214165	0.00176252	Actn3/Lmod3/Smyd1/Slc25a4/Myf6/Hamp2	6
	GO:2001257	regulation of cation channel activity	9/282	196/28943	0.000139311	0.00222442	0.00183064	Casq1/Trdn/Jsrp1/Lrrc38/Hrc/Stac3/Jph2/Actn2/Scn1b	9
	GO:0003208	cardiac ventricle morphogenesis	6/282	82/28943	0.000152772	0.00242352	0.0019945	Myl3/Myh7/Myl2/Tnni1/Tnnc1/Myh6	6
	GO:0051147	regulation of muscle cell differentiation	8/282	157/28943	0.000160662	0.00253224	0.00208397	Actn3/Lmod3/Trim72/Plpp7/Smyd1/Slc25a4/Myf6/Hamp2	8
	GO:0097720	calcineurin-mediated signaling	5/282	53/28943	0.000165916	0.00259829	0.00213833	3425401B19Rik/Actn3/Myoz1/Cmya5/Myoz2	5
	GO:0009161	ribonucleoside monophosphate metabolic process	5/282	54/28943	0.000181403	0.00282272	0.00232303	Ampd1/Adssl1/Ak1/Nt5c1a/Gmpr	5
	GO:0014874	response to stimulus involved in regulation of muscle adaptation	3/282	12/28943	0.000188642	0.00289845	0.00238535	Actn3/Srl/Prkag3	3
	GO:0048241	epinephrine transport	3/282	12/28943	0.000188642	0.00289845	0.00238535	Crhr2/Vip/Gck	3
	GO:0046033	AMP metabolic process	4/282	30/28943	0.000198005	0.00302329	0.00248809	Ampd1/Adssl1/Ak1/Nt5c1a	4
	GO:0048016	inositol phosphate-mediated signaling	5/282	56/28943	0.000215661	0.00327242	0.00269312	3425401B19Rik/Actn3/Myoz1/Cmya5/Myoz2	5
	GO:0048742	regulation of skeletal muscle fiber development	3/282	13/28943	0.000243469	0.00367157	0.00302161	Actn3/Lmod3/Myf6	3
	GO:0070509	calcium ion import	5/282	59/28943	0.000276015	0.00413684	0.00340452	Atp2a1/Ucn/Crhr2/Casr/Gck	5
	GO:2001259	positive regulation of cation channel activity	6/282	92/28943	0.000286878	0.00427343	0.00351693	Casq1/Trdn/Lrrc38/Stac3/Jph2/Actn2	6
	GO:0043470	regulation of carbohydrate catabolic process	5/282	60/28943	0.000298733	0.00442306	0.00364007	Actn3/Mlxipl/Gpd1/Ppp1r3c/Gck	5
	GO:0006002	fructose 6-phosphate metabolic process	3/282	14/28943	0.00030764	0.00452749	0.00372601	Pfkm/Hk2/Gck	3
	GO:0050982	detection of mechanical stimulus	5/282	62/28943	0.000348392	0.00509653	0.00419431	Ttn/Tcap/Chrna10/Pkdrej/Ptprq	5
	GO:0009612	response to mechanical stimulus	8/282	177/28943	0.000362361	0.00526933	0.00433652	Ttn/Tcap/Ucn/Atp1a2/Ankrd23/Chrna10/Pkdrej/Ptprq	8
	GO:0009582	detection of abiotic stimulus	7/282	136/28943	0.000387598	0.00560297	0.0046111	Ttn/Tcap/Otop1/Chrna10/Opn1mw/Pkdrej/Ptprq	7
	GO:0033692	cellular polysaccharide biosynthetic process	5/282	64/28943	0.000404052	0.00578781	0.00476322	Prkag3/Ppp1r3a/Ppp1r3c/Gys2/Gck	5
	GO:0009581	detection of external stimulus	7/282	137/28943	0.000405123	0.00578781	0.00476322	Ttn/Tcap/Otop1/Chrna10/Opn1mw/Pkdrej/Ptprq	7
	GO:0061844	antimicrobial humoral immune response mediated by antimicrobial peptide	7/282	139/28943	0.000442073	0.00627897	0.00516743	Ccl19/Kng2/Hamp2/Vip/Il17a/Ccl21b/Kng1	7
	GO:0106380	purine ribonucleotide salvage	3/282	16/28943	0.000466508	0.00658774	0.00542154	Ampd1/Adssl1/Gmpr	3
	GO:0009123	nucleoside monophosphate metabolic process	5/282	67/28943	0.000499799	0.00701729	0.00577505	Ampd1/Adssl1/Ak1/Nt5c1a/Gmpr	5
	GO:0043271	negative regulation of ion transport	8/282	187/28943	0.000522074	0.00727393	0.00598626	Trdn/Hrc/Crhr2/Atp1a2/Actn2/Sln/Hamp2/Vip	8
	GO:0032411	positive regulation of transporter activity	7/282	143/28943	0.000524032	0.00727393	0.00598626	Casq1/Trdn/Lrrc38/Stac3/Jph2/Actn2/Slc25a4	7
	GO:0003300	cardiac muscle hypertrophy	6/282	107/28943	0.000643995	0.00888859	0.00731508	Ttn/Myh7/Tcap/Slc25a4/Hamp2/Myh6	6
	GO:0043467	regulation of generation of precursor metabolites and energy	7/282	149/28943	0.000669198	0.00914468	0.00752583	Actn3/Mlxipl/Cox7a1/Gpd1/Ppp1r3a/Ppp1r3c/Gck	7
	GO:0032261	purine nucleotide salvage	3/282	18/28943	0.000670036	0.00914468	0.00752583	Ampd1/Adssl1/Gmpr	3
	GO:0000271	polysaccharide biosynthetic process	5/282	72/28943	0.000696044	0.00944686	0.00777453	Prkag3/Ppp1r3a/Ppp1r3c/Gys2/Gck	5
	GO:0019722	calcium-mediated signaling	8/282	196/28943	0.000710603	0.00959118	0.00789329	3425401B19Rik/Casq1/Actn3/Myoz1/Tmem38a/Cmya5/Myoz2/Treml1	8
	GO:0048168	regulation of neuronal synaptic plasticity	5/282	73/28943	0.000741349	0.00995118	0.00818957	Mylk2/Camk2a/Neurl1a/Camk2b/Rab3a	5
	GO:0042391	regulation of membrane potential	13/282	469/28943	0.000761462	0.0101653	0.00836579	Scn4a/Trdn/Clcn1/Slc8a3/Scn4b/Chchd10/Kcnc4/Actn2/Scn1b/Popdc3/Chrna10/Chrne/Ntsr2	13
	GO:0014897	striated muscle hypertrophy	6/282	111/28943	0.000781193	0.0103584	0.0085247	Ttn/Myh7/Tcap/Slc25a4/Hamp2/Myh6	6
	GO:0003205	cardiac chamber development	8/282	199/28943	0.000784406	0.0103584	0.0085247	Myl3/Myh7/Myl2/Tnni1/Xirp2/Tnnc1/Sall4/Myh6	8
	GO:0051281	positive regulation of release of sequestered calcium ion into cytosol	4/282	43/28943	0.000807356	0.0105863	0.00871228	Casq1/Trdn/Jph2/Capn3	4
	GO:0009152	purine ribonucleotide biosynthetic process	8/282	200/28943	0.000810333	0.0105863	0.00871228	Ampd1/Adssl1/Ak1/Aldoa/Acss2/Acsl6/Gmpr/Nppc	8
	GO:0006814	sodium ion transport	9/282	250/28943	0.000823809	0.0107051	0.00881006	Scn4a/Slc38a3/Slc8a3/Scn4b/Atp1a2/Scn1b/Slc9a2/Mfsd4b1/Atp1b4	9
	GO:0034637	cellular carbohydrate biosynthetic process	5/282	75/28943	0.000838522	0.0108387	0.00891995	Prkag3/Ppp1r3a/Ppp1r3c/Gys2/Gck	5
	GO:0002027	regulation of heart rate	6/282	113/28943	0.000857737	0.0109709	0.00902881	Myh7/Hrc/Scn4b/Crhr2/Scn1b/Myh6	6
	GO:0014896	muscle hypertrophy	6/282	113/28943	0.000857737	0.0109709	0.00902881	Ttn/Myh7/Tcap/Slc25a4/Hamp2/Myh6	6
	GO:0051926	negative regulation of calcium ion transport	5/282	76/28943	0.000890521	0.0113309	0.00932508	Trdn/Hrc/Crhr2/Atp1a2/Sln	5
	GO:0019318	hexose metabolic process	9/282	253/28943	0.00089597	0.0113412	0.00933353	Actn3/Eno3/Pfkm/Pgam2/Gpd1/Aldoa/Hk2/Aldh1a7/Gck	9
	GO:0071805	potassium ion transmembrane transport	8/282	207/28943	0.00101172	0.0127404	0.010485	Kcna7/Tmem38a/Lrrc38/Kcnc4/Atp1a2/Actn2/Slc9a2/Kcng4	8
	GO:0035994	response to muscle stretch	3/282	21/28943	0.00106875	0.0132536	0.0109073	Ttn/Tcap/Ankrd23	3
	GO:0043101	purine-containing compound salvage	3/282	21/28943	0.00106875	0.0132536	0.0109073	Ampd1/Adssl1/Gmpr	3
	GO:0045821	positive regulation of glycolytic process	3/282	21/28943	0.00106875	0.0132536	0.0109073	Mlxipl/Gpd1/Gck	3
	GO:0043403	skeletal muscle tissue regeneration	4/282	47/28943	0.00113185	0.0139051	0.0114435	Myoz1/Tmem182/Capn3/Myf6	4
	GO:0035637	multicellular organismal signaling	7/282	163/28943	0.00113267	0.0139051	0.0114435	Scn4a/Hrc/Clcn1/Scn4b/Kcnc4/Scn1b/Chrm5	7
	GO:0009260	ribonucleotide biosynthetic process	8/282	212/28943	0.00117867	0.0143975	0.0118488	Ampd1/Adssl1/Ak1/Aldoa/Acss2/Acsl6/Gmpr/Nppc	8
	GO:0006110	regulation of glycolytic process	4/282	49/28943	0.00132419	0.0160945	0.0132453	Actn3/Mlxipl/Gpd1/Gck	4
	GO:0005996	monosaccharide metabolic process	9/282	268/28943	0.00133789	0.0161806	0.0133162	Actn3/Eno3/Pfkm/Pgam2/Gpd1/Aldoa/Hk2/Aldh1a7/Gck	9
	GO:0030832	regulation of actin filament length	7/282	168/28943	0.00134859	0.0162296	0.0133565	Neb/Lmod3/Actn2/Tmod4/Tmsb15a/Tmod1/Ccl21b	7
	GO:0006006	glucose metabolic process	8/282	217/28943	0.0013669	0.0162894	0.0134058	Actn3/Eno3/Pfkm/Pgam2/Gpd1/Aldoa/Hk2/Gck	8
	GO:0006164	purine nucleotide biosynthetic process	8/282	217/28943	0.0013669	0.0162894	0.0134058	Ampd1/Adssl1/Ak1/Aldoa/Acss2/Acsl6/Gmpr/Nppc	8
	GO:0005980	glycogen catabolic process	3/282	23/28943	0.00140279	0.0165557	0.0136249	Pygm/Pfkm/Ppp1r3c	3
	GO:0009168	purine ribonucleoside monophosphate biosynthetic process	3/282	23/28943	0.00140279	0.0165557	0.0136249	Ampd1/Adssl1/Gmpr	3
	GO:1901021	positive regulation of calcium ion transmembrane transporter activity	4/282	50/28943	0.00142843	0.0167771	0.0138072	Casq1/Trdn/Stac3/Jph2	4
	GO:0034764	positive regulation of transmembrane transport	9/282	273/28943	0.00151915	0.0177574	0.0146139	Casq1/Trdn/Lrrc38/Ak1/Stac3/Jph2/Actn2/Capn3/Acsl6	9
	GO:0046390	ribose phosphate biosynthetic process	8/282	221/28943	0.00153406	0.0178462	0.014687	Ampd1/Adssl1/Ak1/Aldoa/Acss2/Acsl6/Gmpr/Nppc	8
	GO:0045661	regulation of myoblast differentiation	5/282	86/28943	0.00155152	0.0179195	0.0147473	Smyd1/Klhl41/Tmem182/Capn3/Myf6	5
	GO:0009251	glucan catabolic process	3/282	24/28943	0.00159171	0.0179195	0.0147473	Pygm/Pfkm/Ppp1r3c	3
	GO:0014850	response to muscle activity	3/282	24/28943	0.00159171	0.0179195	0.0147473	Srl/Prkag3/Capn3	3
	GO:0043173	nucleotide salvage	3/282	24/28943	0.00159171	0.0179195	0.0147473	Ampd1/Adssl1/Gmpr	3
	GO:0044247	cellular polysaccharide catabolic process	3/282	24/28943	0.00159171	0.0179195	0.0147473	Pygm/Pfkm/Ppp1r3c	3
	GO:0048643	positive regulation of skeletal muscle tissue development	3/282	24/28943	0.00159171	0.0179195	0.0147473	Actn3/Lmod3/Myf6	3
	GO:0060457	negative regulation of digestive system process	3/282	24/28943	0.00159171	0.0179195	0.0147473	Ucn/Crhr2/Hamp2	3
	GO:0072522	purine-containing compound biosynthetic process	8/282	225/28943	0.00171703	0.0192418	0.0158355	Ampd1/Adssl1/Ak1/Aldoa/Acss2/Acsl6/Gmpr/Nppc	8
	GO:0009127	purine nucleoside monophosphate biosynthetic process	3/282	25/28943	0.00179581	0.0200327	0.0164864	Ampd1/Adssl1/Gmpr	3
	GO:0050848	regulation of calcium-mediated signaling	5/282	89/28943	0.00180605	0.0200554	0.0165051	3425401B19Rik/Actn3/Myoz1/Cmya5/Myoz2	5
	GO:0019730	antimicrobial humoral response	7/282	177/28943	0.00181709	0.0200866	0.0165308	Ccl19/Kng2/Hamp2/Vip/Il17a/Ccl21b/Kng1	7
	GO:0051606	detection of stimulus	9/282	283/28943	0.00194082	0.0213578	0.0175769	Ttn/Tcap/Otop1/Chrna10/Casr/Opn1mw/Gck/Pkdrej/Ptprq	9
	GO:0051937	catecholamine transport	5/282	91/28943	0.00199191	0.0218216	0.0179587	Crhr2/Rab3a/Vip/Gck/Chrm5	5
	GO:0002082	regulation of oxidative phosphorylation	3/282	26/28943	0.00201552	0.021884	0.01801	Actn3/Mlxipl/Cox7a1	3
	GO:0010996	response to auditory stimulus	3/282	26/28943	0.00201552	0.021884	0.01801	Ucn/Atp1a2/Chrna10	3
	GO:0032414	positive regulation of ion transmembrane transporter activity	6/282	135/28943	0.00213606	0.0230902	0.0190026	Casq1/Trdn/Lrrc38/Stac3/Jph2/Actn2	6
	GO:0030834	regulation of actin filament depolymerization	4/282	56/28943	0.00217656	0.0233217	0.0191931	Lmod3/Actn2/Tmod4/Tmod1	4
	GO:1901861	regulation of muscle tissue development	4/282	56/28943	0.00217656	0.0233217	0.0191931	Actn3/Lmod3/Jph2/Myf6	4
	GO:0036336	dendritic cell migration	3/282	27/28943	0.00225124	0.0240165	0.0197649	Ccl19/Asb2/Ccl21b	3
	GO:0031640	killing of cells of another organism	5/282	94/28943	0.00229636	0.0243913	0.0200734	Ccl19/Kng2/Hamp2/Ccl21b/Kng1	5
	GO:0000272	polysaccharide catabolic process	3/282	28/28943	0.00250336	0.0260243	0.0214173	Pygm/Pfkm/Ppp1r3c	3
	GO:0001778	plasma membrane repair	3/282	28/28943	0.00250336	0.0260243	0.0214173	Myh2/Trim72/Rab3a	3
	GO:0003299	muscle hypertrophy in response to stress	3/282	28/28943	0.00250336	0.0260243	0.0214173	Myh7/Tcap/Myh6	3
	GO:0014898	cardiac muscle hypertrophy in response to stress	3/282	28/28943	0.00250336	0.0260243	0.0214173	Myh7/Tcap/Myh6	3
	GO:0043931	ossification involved in bone maturation	3/282	28/28943	0.00250336	0.0260243	0.0214173	Ryr1/Actn3/Phospho1	3
	GO:1901879	regulation of protein depolymerization	5/282	96/28943	0.00251728	0.0260581	0.0214451	Lmod3/Trim54/Actn2/Tmod4/Tmod1	5
	GO:0010038	response to metal ion	9/282	296/28943	0.00262348	0.0270428	0.0222556	Ttn/Pgam2/Tnnc1/Camk2b/Serpina1c/Capn3/Hamp2/Casr/Slc30a3	9
	GO:0032970	regulation of actin filament-based process	11/282	416/28943	0.00273898	0.028068	0.0230992	Neb/Mylk2/Lmod3/Tnnc1/Atp1a2/Actn2/Tmod4/Ankrd23/Tmsb15a/Tmod1/Ccl21b	11
	GO:0007274	neuromuscular synaptic transmission	3/282	29/28943	0.00277226	0.028068	0.0230992	Mylk2/Stac3/Rab3a	3
	GO:0014887	cardiac muscle adaptation	3/282	29/28943	0.00277226	0.028068	0.0230992	Myh7/Tcap/Myh6	3
	GO:1901863	positive regulation of muscle tissue development	3/282	29/28943	0.00277226	0.028068	0.0230992	Actn3/Lmod3/Myf6	3
	GO:1904064	positive regulation of cation transmembrane transport	7/282	191/28943	0.00278611	0.028068	0.0230992	Casq1/Trdn/Lrrc38/Stac3/Jph2/Actn2/Capn3	7
	GO:0030042	actin filament depolymerization	4/282	60/28943	0.00280335	0.028068	0.0230992	Lmod3/Actn2/Tmod4/Tmod1	4
	GO:0046902	regulation of mitochondrial membrane permeability	4/282	60/28943	0.00280335	0.028068	0.0230992	Camk2a/Chchd10/Slc25a4/Hk2	4
	GO:0019226	transmission of nerve impulse	5/282	99/28943	0.00287702	0.028688	0.0236095	Scn4a/Clcn1/Kcnc4/Scn1b/Chrm5	5
	GO:0140115	export across plasma membrane	4/282	61/28943	0.00297742	0.0295685	0.0243341	Slc8a3/Atp1a2/Hamp2/Atp2b3	4
	GO:0044262	cellular carbohydrate metabolic process	9/282	302/28943	0.00299676	0.02964	0.024393	Actn3/Pygm/Pfkm/Prkag3/Ppp1r3a/Ppp1r3c/Hk2/Gys2/Gck	9
	GO:0005979	regulation of glycogen biosynthetic process	3/282	30/28943	0.00305828	0.0297665	0.0244971	Ppp1r3a/Ppp1r3c/Gck	3
	GO:0010962	regulation of glucan biosynthetic process	3/282	30/28943	0.00305828	0.0297665	0.0244971	Ppp1r3a/Ppp1r3c/Gck	3
	GO:0045932	negative regulation of muscle contraction	3/282	30/28943	0.00305828	0.0297665	0.0244971	Atp2a1/Atp1a2/Tnnt1	3
	GO:0070977	bone maturation	3/282	30/28943	0.00305828	0.0297665	0.0244971	Ryr1/Actn3/Phospho1	3
	GO:0050873	brown fat cell differentiation	4/282	62/28943	0.00315874	0.0306222	0.0252013	Ucp1/Mb/Slc2a4/Six1	4
	GO:1903532	positive regulation of secretion by cell	10/282	365/28943	0.00328111	0.0316828	0.0260741	Ttn/Pfkm/Ucn/Myom1/Crhr2/Casr/Nppc/Rab3a/Vip/Gck	10
	GO:0086010	membrane depolarization during action potential	3/282	31/28943	0.00336179	0.032334	0.0266101	Scn4a/Scn4b/Scn1b	3
	GO:0048641	regulation of skeletal muscle tissue development	3/282	32/28943	0.00368309	0.0352854	0.029039	Actn3/Lmod3/Myf6	3
	GO:0003206	cardiac chamber morphogenesis	6/282	151/28943	0.00372348	0.035533	0.0292428	Myl3/Myh7/Myl2/Tnni1/Tnnc1/Myh6	6
	GO:0035725	sodium ion transmembrane transport	6/282	153/28943	0.00397058	0.0375529	0.0309051	Scn4a/Slc8a3/Scn4b/Atp1a2/Scn1b/Slc9a2	6
	GO:1904427	positive regulation of calcium ion transmembrane transport	5/282	107/28943	0.00401642	0.0375529	0.0309051	Casq1/Trdn/Stac3/Jph2/Capn3	5
	GO:0009156	ribonucleoside monophosphate biosynthetic process	3/282	33/28943	0.0040225	0.0375529	0.0309051	Ampd1/Adssl1/Gmpr	3
	GO:2001014	regulation of skeletal muscle cell differentiation	3/282	33/28943	0.0040225	0.0375529	0.0309051	Klhl41/Rbfox1/Six1	3
	GO:0043416	regulation of skeletal muscle tissue regeneration	2/282	10/28943	0.00404274	0.0375529	0.0309051	Myoz1/Capn3	2
	GO:0090129	positive regulation of synapse maturation	2/282	10/28943	0.00404274	0.0375529	0.0309051	Neurl1a/Camk2b	2
	GO:1901856	negative regulation of cellular respiration	2/282	10/28943	0.00404274	0.0375529	0.0309051	Actn3/Mlxipl	2
	GO:0016051	carbohydrate biosynthetic process	7/282	205/28943	0.00410974	0.0380306	0.0312982	Pgam2/Gpd1/Prkag3/Ppp1r3a/Ppp1r3c/Gys2/Gck	7
	GO:0007006	mitochondrial membrane organization	5/282	108/28943	0.00417856	0.0383768	0.0315831	Camk2a/Chchd10/Slc25a4/Hk2/Mtfp1	5
	GO:1904063	negative regulation of cation transmembrane transport	5/282	108/28943	0.00417856	0.0383768	0.0315831	Trdn/Atp1a2/Actn2/Sln/Hamp2	5
	GO:0032271	regulation of protein polymerization	7/282	206/28943	0.0042198	0.0386104	0.0317754	Lmod3/Pde4dip/Tmod4/Tmsb15a/Tmod1/Tppp2/Ccl21b	7
	GO:0015844	monoamine transport	5/282	109/28943	0.00434532	0.0392898	0.0323345	Crhr2/Rab3a/Vip/Gck/Chrm5	5
	GO:0008643	carbohydrate transport	6/282	156/28943	0.00436373	0.0392898	0.0323345	Dhrs7c/Slc2a4/Ak1/Slc2a5/Hk2/Mfsd4b1	6
	GO:0000038	very long-chain fatty acid metabolic process	3/282	34/28943	0.00438033	0.0392898	0.0323345	Elovl3/Acsl6/Tecrl	3
	GO:0043094	cellular metabolic compound salvage	3/282	34/28943	0.00438033	0.0392898	0.0323345	Ampd1/Adssl1/Gmpr	3
	GO:0048799	animal organ maturation	3/282	34/28943	0.00438033	0.0392898	0.0323345	Ryr1/Actn3/Phospho1	3
	GO:0030837	negative regulation of actin filament polymerization	4/282	68/28943	0.00440663	0.0392898	0.0323345	Lmod3/Tmod4/Tmsb15a/Tmod1	4
	GO:0050433	regulation of catecholamine secretion	4/282	68/28943	0.00440663	0.0392898	0.0323345	Crhr2/Rab3a/Vip/Gck	4
	GO:0014074	response to purine-containing compound	5/282	110/28943	0.00451676	0.0401253	0.0330221	Ryr1/Pygm/Tmem38a/Slc8a3/Gpd1	5
	GO:0009165	nucleotide biosynthetic process	8/282	264/28943	0.00455408	0.0403102	0.0331743	Ampd1/Adssl1/Ak1/Aldoa/Acss2/Acsl6/Gmpr/Nppc	8
	GO:0042246	tissue regeneration	4/282	69/28943	0.00464258	0.0409452	0.0336969	Myoz1/Tmem182/Capn3/Myf6	4
	GO:0090218	positive regulation of lipid kinase activity	3/282	35/28943	0.00475685	0.0418021	0.034402	Eef1a2/Ccl19/Ccl21b	3
	GO:0014889	muscle atrophy	2/282	11/28943	0.00490946	0.0425313	0.0350021	Actn3/Asb2	2
	GO:0019227	neuronal action potential propagation	2/282	11/28943	0.00490946	0.0425313	0.0350021	Clcn1/Scn1b	2
	GO:0071415	cellular response to purine-containing compound	2/282	11/28943	0.00490946	0.0425313	0.0350021	Ryr1/Tmem38a	2
	GO:0098870	action potential propagation	2/282	11/28943	0.00490946	0.0425313	0.0350021	Clcn1/Scn1b	2
	GO:0034767	positive regulation of ion transmembrane transport	7/282	213/28943	0.00505392	0.043628	0.0359047	Casq1/Trdn/Lrrc38/Stac3/Jph2/Actn2/Capn3	7
	GO:1901293	nucleoside phosphate biosynthetic process	8/282	269/28943	0.00508831	0.0437702	0.0360218	Ampd1/Adssl1/Ak1/Aldoa/Acss2/Acsl6/Gmpr/Nppc	8
	GO:1903715	regulation of aerobic respiration	3/282	36/28943	0.00515233	0.0441654	0.036347	Actn3/Mlxipl/Cox7a1	3
	GO:0006631	fatty acid metabolic process	11/282	453/28943	0.00517285	0.0441863	0.0363642	Mlxipl/Tuba8/Prkag3/Acss2/Pnpla3/Cpt1b/Ankrd23/Elovl3/Acsl6/Hacl1/Tecrl	11
	GO:0070873	regulation of glycogen metabolic process	3/282	37/28943	0.00556704	0.0472232	0.0388635	Ppp1r3a/Ppp1r3c/Gck	3
	GO:0090279	regulation of calcium ion import	3/282	37/28943	0.00556704	0.0472232	0.0388635	Ucn/Crhr2/Casr	3
	GO:1904659	glucose transmembrane transport	5/282	116/28943	0.00564786	0.047743	0.0392913	Dhrs7c/Slc2a4/Ak1/Slc2a5/Hk2	5
	GO:0051258	protein polymerization	8/282	274/28943	0.00566925	0.0477586	0.0393041	Casq1/Lmod3/Pde4dip/Tmod4/Tmsb15a/Tmod1/Tppp2/Ccl21b	8
	GO:0008064	regulation of actin polymerization or depolymerization	6/282	165/28943	0.00571583	0.0478211	0.0393556	Lmod3/Actn2/Tmod4/Tmsb15a/Tmod1/Ccl21b	6
	GO:1990845	adaptive thermogenesis	6/282	165/28943	0.00571583	0.0478211	0.0393556	Ucp1/Actn3/Cidea/Slc25a4/Elovl3/Sln	6
	GO:0030388	fructose 1,6-bisphosphate metabolic process	2/282	12/28943	0.00585363	0.0481535	0.0396291	Pfkm/Aldoa	2
	GO:0048630	skeletal muscle tissue growth	2/282	12/28943	0.00585363	0.0481535	0.0396291	Actn3/Crhr2	2
	GO:0008645	hexose transmembrane transport	5/282	117/28943	0.00585411	0.0481535	0.0396291	Dhrs7c/Slc2a4/Ak1/Slc2a5/Hk2	5
	GO:0034766	negative regulation of ion transmembrane transport	5/282	117/28943	0.00585411	0.0481535	0.0396291	Trdn/Atp1a2/Actn2/Sln/Hamp2	5
	GO:0051952	regulation of amine transport	5/282	117/28943	0.00585411	0.0481535	0.0396291	Slc38a3/Crhr2/Rab3a/Vip/Gck	5
	GO:0050432	catecholamine secretion	4/282	74/28943	0.00595017	0.0487794	0.0401442	Crhr2/Rab3a/Vip/Gck	4
	GO:0095500	acetylcholine receptor signaling pathway	3/282	38/28943	0.00600121	0.0488699	0.0402187	Chrne/Slurp2/Chrm5	3
	GO:1903580	positive regulation of ATP metabolic process	3/282	38/28943	0.00600121	0.0488699	0.0402187	Mlxipl/Gpd1/Gck	3
	GO_CC_DOWN DEGs
	ID	Description	Gene Ratio	Bg Ratio	P value	P Adj	q value	Gene ID	Count
	GO:0005882	intermediate filament	27/634	140/28804	5.59007e-18	2.10746e-15	1.65348e-15	Krt77/Krt27/Krt31/Krt78/Krt32/Krt16/Krt75/Krt88/Krt4/Krt42/Krt6a/Evpl/Slc1a4/Fam83h/Krt15/Krt79/Krt23/Dsp/Eppk1/Krt7/Shank2/Krt17/Krt19/Krt5/Krt14/Krt8/Krt18	27
	GO:0062023	collagen-containing extracellular matrix	42/634	396/28804	4.39318e-17	8.28114e-15	6.49728e-15	Fga/Matn3/Lamb3/Ang4/Sftpa1/Pzp/Ptprz1/Lamc2/Vwa2/Dmbt1/Timp1/Reg3g/Sftpd/Fgb/Slit2/Tnc/Lrrc15/Fgg/Angptl4/Acan/Col4a5/Muc1/Muc4/Col12a1/Efna5/Col7a1/Postn/Col16a1/Col17a1/Col8a2/Fbn2/Col9a1/Col4a6/Lama1/Trf/Itih2/Ptn/Col9a3/Col9a2/Fgfr2/Col11a1/Col2a1	42
	GO:0045111	intermediate filament cytoskeleton	27/634	178/28804	3.06545e-15	3.82512e-13	3.00114e-13	Krt77/Krt27/Krt31/Krt78/Krt32/Krt16/Krt75/Krt88/Krt4/Krt42/Krt6a/Evpl/Slc1a4/Fam83h/Krt15/Krt79/Krt23/Dsp/Eppk1/Krt7/Shank2/Krt17/Krt19/Krt5/Krt14/Krt8/Krt18	27
	GO:0016324	apical plasma membrane	38/634	370/28804	4.05848e-15	3.82512e-13	3.00114e-13	Umod/Cdhr2/Gp2/Aqp6/Slc12a1/Atp12a/Clcnka/Upk1b/Scnn1g/Aqp2/Adgrg2/Gjb6/Scnn1b/Slc44a4/Kcnk1/Scnn1a/Rab17/Slc34a2/Sptbn2/Ano1/Atp6v0a4/Igfbp2/Slc5a1/Upk2/Muc1/Muc4/Shroom3/Oxtr/Slc5a8/Trf/Plet1/Shank2/Atp6v1b1/Epcam/Prom2/Upk3a/Aqp5/Cldn4	38
	GO:0045177	apical part of cell	43/634	488/28804	1.47019e-14	1.10852e-12	8.69734e-13	Umod/Cdhr2/Gp2/Aqp6/Slc12a1/Atp12a/Clcnka/Upk1b/Scnn1g/Aqp2/Atp7b/Adgrg2/Gjb6/Scnn1b/Slc44a4/Kcnk1/Myo5b/Scnn1a/Edar/Rab17/Slc34a2/Sptbn2/Ano1/Atp6v0a4/Igfbp2/Slc5a1/Upk2/Muc1/Muc4/Shroom3/Cdh1/Oxtr/Slc5a8/Spp1/Trf/Plet1/Shank2/Atp6v1b1/Epcam/Prom2/Upk3a/Aqp5/Cldn4	43
	GO:0045095	keratin filament	15/634	53/28804	3.37916e-13	2.12324e-11	1.66587e-11	Krt77/Krt78/Krt75/Krt88/Krt4/Krt6a/Fam83h/Krt79/Eppk1/Krt7/Krt17/Krt5/Krt14/Krt8/Krt18	15
	GO:0019814	immunoglobulin complex	22/634	150/28804	2.28971e-12	1.23317e-10	9.67533e-11	Ighv5-9-1/Ighv5-12/Ighv1-7/Ighv6-6/Ighv1-75/Ighv14-2/Ighv1-64/Ighv14-1/Ighv3-6/Ighv9-3/Ighv6-3/Ighv1-12/Ighv1-53/Ighv1-63/Ighv1-50/Pigr/Ighg1/Ighv1-11/Ighg2c/Ighv1-52/Ighv1-61/Igkv4-55	22
	GO:0042571	immunoglobulin complex, circulating	21/634	139/28804	4.03033e-12	1.89929e-10	1.49016e-10	Ighv5-9-1/Ighv5-12/Ighv1-7/Ighv6-6/Ighv1-75/Ighv14-2/Ighv1-64/Ighv14-1/Ighv3-6/Ighv9-3/Ighv6-3/Ighv1-12/Ighv1-53/Ighv1-63/Ighv1-50/Pigr/Ighg1/Ighv1-11/Ighg2c/Ighv1-52/Ighv1-61	21
	GO:0005604	basement membrane	19/634	120/28804	1.82771e-11	7.65609e-10	6.00687e-10	Lamb3/Ang4/Lamc2/Vwa2/Timp1/Tnc/Acan/Col4a5/Efna5/Col7a1/Col17a1/Col8a2/Col9a1/Col4a6/Lama1/Trf/Ptn/Col9a3/Col2a1	19
	GO:0001533	cornified envelope	14/634	61/28804	4.72152e-11	1.78001e-09	1.39658e-09	Krt77/Krt78/Krt16/Klk6/Krt75/Evpl/Dsp/Sprr1a/Serpinb5/Pkp1/Lgals7/Krt17/Krt5/Krt14	14
	GO:0045178	basal part of cell	27/634	300/28804	7.88339e-10	2.70185e-08	2.11984e-08	Umod/Slc26a7/Atp12a/Clcnka/Slc13a3/Rhbg/Lpo/Aqp2/Erbb4/Atp7b/Muc20/Met/Rab17/Nkd2/Cldn8/Cxadr/Dsp/Eppk1/Cdh1/Trf/Tacstd2/Atp6v1b1/Epcam/Cldn7/Aqp5/Cldn4/Krt14	27
	GO:0016327	apicolateral plasma membrane	9/634	25/28804	1.70946e-09	5.37054e-08	4.21366e-08	Cldn8/Cldn6/Cxadr/Eppk1/Cldn7/Cldn4/Cldn3/Krt19/Krt8	9
	GO:0005581	collagen trimer	14/634	81/28804	2.55157e-09	7.33103e-08	5.75184e-08	Sftpd/Cthrc1/Col4a5/Col12a1/Col7a1/Col16a1/Col17a1/Col8a2/Col9a1/Col4a6/Col9a3/Col9a2/Col11a1/Col2a1	14
	GO:0009925	basal plasma membrane	25/634	275/28804	2.7224e-09	7.33103e-08	5.75184e-08	Umod/Slc26a7/Atp12a/Clcnka/Slc13a3/Rhbg/Lpo/Aqp2/Erbb4/Atp7b/Muc20/Met/Rab17/Nkd2/Cldn8/Cxadr/Dsp/Cdh1/Trf/Tacstd2/Atp6v1b1/Epcam/Cldn7/Aqp5/Cldn4	25
	GO:0043296	apical junction complex	18/634	167/28804	3.40157e-08	8.54927e-07	6.70765e-07	Cldn22/Cldn23/Atp7b/Pof1b/Ildr1/Cldn8/Cgn/Cldn6/Cxadr/Eppk1/Shroom3/Cdh1/Marveld3/Igsf5/Epcam/Cldn7/Cldn4/Cldn3	18
	GO:0005923	bicellular tight junction	16/634	142/28804	1.05262e-07	2.48023e-06	1.94596e-06	Cldn22/Cldn23/Atp7b/Pof1b/Ildr1/Cldn8/Cgn/Cldn6/Cxadr/Eppk1/Marveld3/Igsf5/Epcam/Cldn7/Cldn4/Cldn3	16
	GO:0070160	tight junction	16/634	152/28804	2.71074e-07	6.01147e-06	4.71653e-06	Cldn22/Cldn23/Atp7b/Pof1b/Ildr1/Cldn8/Cgn/Cldn6/Cxadr/Eppk1/Marveld3/Igsf5/Epcam/Cldn7/Cldn4/Cldn3	16
	GO:0031526	brush border membrane	11/634	79/28804	1.25521e-06	2.62897e-05	2.06266e-05	Cdhr2/Slc6a14/Kcnk1/Slc34a2/Atp6v0a4/Slc5a1/Slc28a3/Slco1a5/Slc5a8/Plb1/Shank2	11
	GO:0016323	basolateral plasma membrane	19/634	246/28804	2.58292e-06	5.12506e-05	4.02106e-05	Umod/Slc26a7/Atp12a/Clcnka/Slc13a3/Rhbg/Lpo/Aqp2/Erbb4/Atp7b/Rab17/Nkd2/Cldn8/Cxadr/Dsp/Cdh1/Atp6v1b1/Epcam/Cldn7	19
	GO:0031253	cell projection membrane	21/634	320/28804	1.00509e-05	0.000189459	0.000148647	Gria1/Cdhr2/Slc6a14/Gabra4/Shisa7/Ptprz1/Eps8l1/Kcnh1/Kcnk1/Scnn1a/Slc34a2/Atp6v0a4/Slc5a1/Map2/Muc4/Slc28a3/Slco1a5/Slc5a8/Plb1/Wwc1/Shank2	21
	GO:0016328	lateral plasma membrane	9/634	67/28804	1.57104e-05	0.000280489	0.000220068	Gjb2/Nkd2/Cdh1/Tacstd2/Atp6v1b1/Epcam/Cldn7/Cldn4/Cldn3	9
	GO:0005912	adherens junction	13/634	142/28804	1.63681e-05	0.000280489	0.000220068	Arvcf/Cdh18/Dsg3/Cdh3/Pof1b/Nectin4/Efna5/Cxadr/Shroom3/Cdh1/Oxtr/Fat2/Pkp1	13
	GO:0005903	brush border	13/634	144/28804	1.9016e-05	0.000311697	0.000244554	Cdhr2/Slc6a14/Kcnk1/Myo5b/Slc34a2/Atp6v0a4/Cgn/Slc5a1/Slc28a3/Slco1a5/Slc5a8/Plb1/Shank2	13
	GO:0072562	blood microparticle	4/634	10/28804	4.39356e-05	0.000690155	0.000541487	Fga/Fgb/Fgg/Hp	4
	GO:0098644	complex of collagen trimers	5/634	20/28804	5.9935e-05	0.00090382	0.000709125	Col4a5/Col16a1/Col4a6/Col11a1/Col2a1	5
	GO:0034702	ion channel complex	18/634	295/28804	0.000108032	0.00153517	0.00120448	Catsper1/Gria1/Gabra4/Clcnka/Scnn1g/Kcnd2/Lrrc26/Kcnh1/Scnn1b/Kcnk1/Scnn1a/Abcc8/Ano1/Trpv6/Clic6/Gabrp/Cldn4/Mcub	18
	GO:0005902	microvillus	10/634	105/28804	0.000109946	0.00153517	0.00120448	Cdhr2/Lipc/Clca1/Slc34a2/Muc4/Oxtr/Atp6v1b1/Foxa1/Prom2/Aqp5	10
	GO:0030141	secretory granule	23/634	440/28804	0.00013492	0.00176479	0.00138463	Fga/Gp2/Ang4/Klk6/Sprr2a3/Spink5/Syt8/Dmbt1/Tmprss4/Clca1/Reg3g/Fgb/Scnn1a/Moxd1/Itgb2l/Olfm4/Fgg/Kit/Ltf/Cel/Tmem184a/Cxadr/Rab15	23
	GO:0031225	anchored component of membrane	14/634	198/28804	0.000135753	0.00176479	0.00138463	Umod/Gp2/Cntn5/Rhbg/Efna3/Efna4/Smpdl3b/Lypd3/Cd14/Prss8/Meltf/Efna5/Vtcn1/Plet1	14
	GO:0030057	desmosome	5/634	24/28804	0.000152768	0.00191978	0.00150623	Cdsn/Dsg3/Pof1b/Dsp/Pkp1	5
	GO:0098862	cluster of actin-based cell projections	14/634	205/28804	0.000195155	0.00237334	0.00186209	Cdhr2/Slc6a14/Kcnk1/Myo5b/Ido1/Slc34a2/Atp6v0a4/Cgn/Slc5a1/Slc28a3/Slco1a5/Slc5a8/Plb1/Shank2	14
	GO:0060076	excitatory synapse	8/634	79/28804	0.000348363	0.00410415	0.00322006	Gria1/Shisa7/Kcnh1/Met/Sptbn2/Ptprf/Dgki/Fgfr2	8
	GO:0034707	chloride channel complex	6/634	48/28804	0.000621184	0.00709655	0.00556787	Gabra4/Clcnka/Ano1/Clic6/Gabrp/Cldn4	6
	GO:0055037	recycling endosome	11/634	156/28804	0.000706197	0.00783047	0.00614369	Gria1/Aqp2/Myo5b/Rab17/Atp13a4/Ltf/Meltf/Pigr/Rab15/Trf/Rab25	11
	GO:0005922	connexin complex	4/634	20/28804	0.000850762	0.00916393	0.0071899	Gjb6/Gjb3/Gjb2/Gjb4	4
	GO:1903561	extracellular vesicle	9/634	117/28804	0.00115029	0.0120461	0.00945119	Slc12a1/Scnn1g/Defb15/Aqp2/Scnn1b/Scnn1a/Muc1/Defb1/Prom2	9
	GO:1990351	transporter complex	19/634	395/28804	0.001341	0.0133728	0.0104921	Catsper1/Gria1/Gabra4/Clcnka/Scnn1g/Kcnd2/Lrrc26/Kcnh1/Scnn1b/Kcnk1/Scnn1a/Abcc8/Ano1/Trpv6/Clic6/Tmem30b/Gabrp/Cldn4/Mcub	19
	GO:0005938	cell cortex	16/634	306/28804	0.00134792	0.0133728	0.0104921	Fga/Spink5/Fam110c/Misp/Lamc2/Fgb/Myo5b/Scnn1a/Sptbn2/Kdf1/Fgg/Mlph/Shroom3/Cdh1/Fgfr2/Krt19	16
	GO:0034364	high-density lipoprotein particle	5/634	38/28804	0.00139986	0.013532	0.010617	Lipc/Apol7a/Saa1/Apol9a/Hp	5
	GO:1902495	transmembrane transporter complex	18/634	373/28804	0.0017119	0.0161346	0.012659	Catsper1/Gria1/Gabra4/Clcnka/Scnn1g/Kcnd2/Lrrc26/Kcnh1/Scnn1b/Kcnk1/Scnn1a/Abcc8/Ano1/Trpv6/Clic6/Gabrp/Cldn4/Mcub	18
	GO:0098858	actin-based cell projection	13/634	229/28804	0.00180388	0.0161971	0.012708	Cdhr2/Lipc/Ptprz1/Clca1/Slc34a2/Map2/Muc4/Cxadr/Oxtr/Atp6v1b1/Foxa1/Prom2/Aqp5	13
	GO:0043230	extracellular organelle	9/634	126/28804	0.00192842	0.0161971	0.012708	Slc12a1/Scnn1g/Defb15/Aqp2/Scnn1b/Scnn1a/Muc1/Defb1/Prom2	9
	GO:0065010	extracellular membrane-bounded organelle	9/634	126/28804	0.00192842	0.0161971	0.012708	Slc12a1/Scnn1g/Defb15/Aqp2/Scnn1b/Scnn1a/Muc1/Defb1/Prom2	9
	GO:0005583	fibrillar collagen trimer	3/634	12/28804	0.00201301	0.0161971	0.012708	Col16a1/Col11a1/Col2a1	3
	GO:0043256	laminin complex	3/634	12/28804	0.00201301	0.0161971	0.012708	Lamb3/Lamc2/Lama1	3
	GO:0098643	banded collagen fibril	3/634	12/28804	0.00201301	0.0161971	0.012708	Col16a1/Col11a1/Col2a1	3
	GO:0042588	zymogen granule	4/634	25/28804	0.00203602	0.0161971	0.012708	Gp2/Dmbt1/Clca1/Cel	4
	GO:0046658	anchored component of plasma membrane	7/634	81/28804	0.00206222	0.0161971	0.012708	Gp2/Cntn5/Rhbg/Cd14/Prss8/Meltf/Efna5	7
	GO:0030864	cortical actin cytoskeleton	7/634	86/28804	0.00290134	0.0223226	0.017514	Misp/Scnn1a/Sptbn2/Mlph/Shroom3/Cdh1/Krt19	7
	GO:0042589	zymogen granule membrane	3/634	14/28804	0.00322319	0.0243029	0.0190677	Gp2/Dmbt1/Clca1	3
	GO:0043235	receptor complex	19/634	430/28804	0.00345108	0.0254	0.0199285	Gria1/Kctd8/Gabra4/Slitrk5/Lrp1b/Alk/Erbb4/Met/Tnfrsf11b/Ifnlr1/Itgb2l/Cd14/Kit/Pigr/Vdr/Trf/Gabrp/Prlr/Fgfr2	19
	GO:0005791	rough endoplasmic reticulum	7/634	89/28804	0.00351719	0.0254	0.0199285	Fga/Sftpa1/Aqp2/Sftpd/Map2/Cel/Trp63	7
	GO:0034358	plasma lipoprotein particle	5/634	47/28804	0.00363819	0.0254	0.0199285	Lipc/Apol7a/Saa1/Apol9a/Hp	5
	GO:1990777	lipoprotein particle	5/634	47/28804	0.00363819	0.0254	0.0199285	Lipc/Apol7a/Saa1/Apol9a/Hp	5
	GO:0034703	cation channel complex	12/634	224/28804	0.00424502	0.0290977	0.0228297	Catsper1/Gria1/Scnn1g/Kcnd2/Lrrc26/Kcnh1/Scnn1b/Kcnk1/Scnn1a/Abcc8/Trpv6/Mcub	12
	GO:0032994	protein-lipid complex	5/634	50/28804	0.00476204	0.0314348	0.0246634	Lipc/Apol7a/Saa1/Apol9a/Hp	5
	GO:0033116	endoplasmic reticulum-Golgi intermediate compartment membrane	3/634	16/28804	0.00479918	0.0314348	0.0246634	Nat8f5/Nat8f2/Nat8	3
	GO:0070382	exocytic vesicle	13/634	257/28804	0.00483613	0.0314348	0.0246634	Gria1/Sytl5/Syt6/Syn2/Aqp2/Syt8/Ptpn5/Abcc8/Sptbn2/Nkd2/Mal2/Dgki/Rab15	13
	GO:0005921	gap junction	4/634	33/28804	0.00573353	0.0366363	0.0287444	Gjb6/Gjb3/Gjb2/Gjb4	4
	GO:0055038	recycling endosome membrane	5/634	54/28804	0.0066169	0.0415762	0.0326202	Gria1/Aqp2/Rab17/Atp13a4/Pigr	5
	GO_CC_UP DEGs
	ID	Description	Gene Ratio	Bg Ratio	P value	P Adj	q value	Gene ID	Count
	GO:0030016	myofibril	65/281	223/28804	3.48094e-78	9.5726e-76	7.95121e-76	Myh2/Ky/Myh1/Obscn/Ryr1/3425401B19Rik/Myh4/Ttn/Tnnt3/Myl3/Atp2a1/Neb/Casq1/Myh7/Actn3/Pygm/Acta1/Cacna1s/Myom2/Myoz1/Tcap/Myl2/Nrap/Lmod3/Cmya5/Tnni2/Hrc/Tnni1/Myo18b/Smtnl1/Pde4dip/Myl1/Myot/Des/Mypn/Ank1/Ak1/Ldb3/Xirp2/Klhl41/Tnnc2/Aldoa/Jph2/Asb2/Tnnc1/Klhl40/Fhl3/Smtnl2/Myom1/Myoz2/Myom3/Actc1/Actn2/Myoz3/Tpm2/Tnnt1/Tmod4/Kbtbd13/Capn3/Ankrd23/Cavin4/Tmod1/Igfn1/Myh6/Myh13	65
	GO:0043292	contractile fiber	65/281	236/28804	2.37356e-76	3.26365e-74	2.71086e-74	Myh2/Ky/Myh1/Obscn/Ryr1/3425401B19Rik/Myh4/Ttn/Tnnt3/Myl3/Atp2a1/Neb/Casq1/Myh7/Actn3/Pygm/Acta1/Cacna1s/Myom2/Myoz1/Tcap/Myl2/Nrap/Lmod3/Cmya5/Tnni2/Hrc/Tnni1/Myo18b/Smtnl1/Pde4dip/Myl1/Myot/Des/Mypn/Ank1/Ak1/Ldb3/Xirp2/Klhl41/Tnnc2/Aldoa/Jph2/Asb2/Tnnc1/Klhl40/Fhl3/Smtnl2/Myom1/Myoz2/Myom3/Actc1/Actn2/Myoz3/Tpm2/Tnnt1/Tmod4/Kbtbd13/Capn3/Ankrd23/Cavin4/Tmod1/Igfn1/Myh6/Myh13	65
	GO:0030017	sarcomere	59/281	198/28804	1.78962e-71	1.64048e-69	1.36262e-69	Myh2/Ky/Myh1/Obscn/Ryr1/3425401B19Rik/Ttn/Tnnt3/Myl3/Atp2a1/Neb/Casq1/Myh7/Actn3/Pygm/Acta1/Cacna1s/Myom2/Myoz1/Tcap/Nrap/Lmod3/Tnni2/Hrc/Tnni1/Myo18b/Smtnl1/Myot/Des/Mypn/Ank1/Ak1/Ldb3/Xirp2/Klhl41/Tnnc2/Aldoa/Jph2/Asb2/Tnnc1/Klhl40/Fhl3/Smtnl2/Myom1/Myoz2/Myom3/Actc1/Actn2/Myoz3/Tpm2/Tnnt1/Tmod4/Kbtbd13/Capn3/Ankrd23/Cavin4/Tmod1/Igfn1/Myh6	59
	GO:0031674	I band	41/281	144/28804	1.24869e-48	8.58477e-47	7.1307e-47	Ky/Obscn/Ryr1/3425401B19Rik/Ttn/Myl3/Atp2a1/Neb/Casq1/Myh7/Actn3/Pygm/Cacna1s/Myoz1/Tcap/Nrap/Hrc/Myo18b/Smtnl1/Myot/Des/Mypn/Ank1/Ldb3/Xirp2/Aldoa/Jph2/Asb2/Klhl40/Fhl3/Smtnl2/Myoz2/Actc1/Actn2/Myoz3/Kbtbd13/Capn3/Ankrd23/Cavin4/Igfn1/Myh6	41
	GO:0030018	Z disc	33/281	131/28804	2.88902e-37	1.58896e-35	1.31983e-35	Ky/Obscn/Ryr1/3425401B19Rik/Ttn/Neb/Casq1/Myh7/Actn3/Pygm/Myoz1/Tcap/Nrap/Hrc/Myo18b/Myot/Des/Mypn/Ank1/Ldb3/Xirp2/Aldoa/Jph2/Asb2/Fhl3/Myoz2/Actn2/Myoz3/Kbtbd13/Capn3/Cavin4/Igfn1/Myh6	33
	GO:0036379	myofilament	16/281	27/28804	5.18242e-26	2.37528e-24	1.97296e-24	Obscn/Ttn/Tnnt3/Neb/Actn3/Acta1/Lmod3/Tnni2/Tnni1/Tnnc2/Tnnc1/Actn2/Tpm2/Tnnt1/Tmod4/Tmod1	16
	GO:0016528	sarcoplasm	23/281	98/28804	1.741e-25	6.83964e-24	5.68116e-24	Ryr1/Art1/Atp2a1/Casq1/Trdn/Pygm/Cacna1s/Dhrs7c/Jsrp1/Tmem38a/Cmya5/Hrc/Fsd2/Slc2a4/Srl/Ank1/Klhl41/Jph2/Flnc/Camk2b/Cavin4/Hk2/Sln	23
	GO:0005865	striated muscle thin filament	15/281	23/28804	2.16515e-25	7.4427e-24	6.18207e-24	Ttn/Tnnt3/Neb/Actn3/Acta1/Lmod3/Tnni2/Tnni1/Tnnc2/Tnnc1/Actn2/Tpm2/Tnnt1/Tmod4/Tmod1	15
	GO:0016529	sarcoplasmic reticulum	21/281	76/28804	5.02574e-25	1.53564e-23	1.27554e-23	Ryr1/Art1/Atp2a1/Casq1/Trdn/Pygm/Cacna1s/Dhrs7c/Jsrp1/Tmem38a/Cmya5/Hrc/Fsd2/Slc2a4/Srl/Ank1/Klhl41/Jph2/Camk2b/Hk2/Sln	21
	GO:0031672	A band	15/281	38/28804	5.99607e-21	1.64892e-19	1.36963e-19	Myh2/Myh1/Obscn/Ttn/Myl3/Atp2a1/Myom2/Lmod3/Smtnl1/Ank1/Klhl41/Klhl40/Smtnl2/Myom1/Myom3	15
	GO:0031430	M band	10/281	19/28804	5.68663e-16	1.42166e-14	1.18086e-14	Obscn/Ttn/Myom2/Lmod3/Smtnl1/Ank1/Klhl41/Smtnl2/Myom1/Myom3	10
	GO:0032982	myosin filament	10/281	22/28804	3.87938e-15	8.52368e-14	7.07995e-14	Myh2/Myh1/Obscn/Myh4/Myh7/Mybpc2/Myo18b/Myom1/Myh6/Myh13	10
	GO:0042383	sarcolemma	19/281	166/28804	4.02937e-15	8.52368e-14	7.07995e-14	Obscn/Ryr1/Casq1/Cacna1s/Trim72/Clcn1/Slc2a4/Cacng6/Des/Slc8a3/Ank1/Cacng1/Slc2a5/Sgca/Flnc/Atp1a2/Scn1b/Popdc3/Capn3	19
	GO:0016460	myosin II complex	10/281	26/28804	3.07902e-14	6.04808e-13	5.02367e-13	Myh2/Myh1/Myh4/Ttn/Myl3/Myh7/Myo18b/Myl1/Myh6/Myh13	10
	GO:0016459	myosin complex	12/281	56/28804	2.23925e-13	4.1053e-12	3.40995e-12	Myh2/Myh1/Myh4/Ttn/Myl3/Myh7/Myl2/Myo18b/Myl1/Mylpf/Myh6/Myh13	12
	GO:0033017	sarcoplasmic reticulum membrane	7/281	23/28804	1.67409e-09	2.87733e-08	2.38998e-08	Ryr1/Atp2a1/Trdn/Dhrs7c/Hrc/Klhl41/Sln	7
	GO:0014704	intercalated disc	9/281	67/28804	1.83622e-08	2.92638e-07	2.43072e-07	Myh1/Obscn/Nrap/Des/Scn4b/Atp1a2/Scn1b/Ankrd23/Hamp2	9
	GO:0044291	cell-cell contact zone	10/281	90/28804	1.91545e-08	2.92638e-07	2.43072e-07	Myh1/Obscn/Nrap/Des/Scn4b/Atp1a2/Scn1b/Ankrd23/Hamp2/Ajap1	10
	GO:0030315	T-tubule	9/281	70/28804	2.72246e-08	3.9404e-07	3.27299e-07	Ryr1/Casq1/Cacna1s/Slc2a4/Cacng6/Cacng1/Atp1a2/Scn1b/Capn3	9
	GO:1902495	transmembrane transporter complex	18/281	373/28804	3.38131e-08	4.6493e-07	3.86181e-07	Scn4a/Ryr1/Trdn/Cacna1s/Kcna7/Lrrc38/Clcn1/Cacng6/Scn4b/Cacng1/Stac3/Kcnc4/Atp1a2/Scn1b/Chrna10/Chrne/Kcng4/Atp1b4	18
	GO:0034702	ion channel complex	16/281	295/28804	4.0117e-08	5.25341e-07	4.3636e-07	Scn4a/Ryr1/Trdn/Cacna1s/Kcna7/Lrrc38/Clcn1/Cacng6/Scn4b/Cacng1/Stac3/Kcnc4/Scn1b/Chrna10/Chrne/Kcng4	16
	GO:1990351	transporter complex	18/281	395/28804	8.01905e-08	1.00238e-06	8.326e-07	Scn4a/Ryr1/Trdn/Cacna1s/Kcna7/Lrrc38/Clcn1/Cacng6/Scn4b/Cacng1/Stac3/Kcnc4/Atp1a2/Scn1b/Chrna10/Chrne/Kcng4/Atp1b4	18
	GO:0034703	cation channel complex	13/281	224/28804	3.5462e-07	4.24002e-06	3.52186e-06	Scn4a/Ryr1/Trdn/Cacna1s/Kcna7/Lrrc38/Cacng6/Scn4b/Cacng1/Stac3/Kcnc4/Scn1b/Kcng4	13
	GO:0043204	perikaryon	10/281	143/28804	1.51984e-06	1.74149e-05	1.44652e-05	Ucn/Neurl1a/Crhr2/Camk2b/Kng2/Chrna10/Vip/Pnmt/Ntsr2/Kng1	10
	GO:0005884	actin filament	9/281	134/28804	7.09288e-06	7.80217e-05	6.48066e-05	Acta1/Myo18b/Smtnl1/Ldb3/Smtnl2/Actc1/Tpm2/Tmod1/Gck	9
	GO:0030863	cortical cytoskeleton	8/281	121/28804	2.57922e-05	0.000272802	0.000226596	Myh2/Pvalb/Actn3/Pde4dip/Ank1/Actn2/Tmod1/Gys2	8
	GO:0034704	calcium channel complex	6/281	66/28804	4.54518e-05	0.000462935	0.000384524	Ryr1/Trdn/Cacna1s/Cacng6/Cacng1/Stac3	6
	GO:0001725	stress fiber	6/281	88/28804	0.000226698	0.00209689	0.00174172	Myh7/Acta1/Ldb3/Xirp2/Fhl3/Myh6	6
	GO:0097517	contractile actin filament bundle	6/281	88/28804	0.000226698	0.00209689	0.00174172	Myh7/Acta1/Ldb3/Xirp2/Fhl3/Myh6	6
	GO:0005938	cell cortex	11/281	306/28804	0.000228752	0.00209689	0.00174172	Myh2/Ryr1/Pvalb/Actn3/Pde4dip/Ank1/Actn2/Hamp2/Tmod1/Gys2/Gck	11
	GO:0043196	varicosity	3/281	15/28804	0.000383176	0.00320227	0.00265988	Ucn/Crhr2/Pnmt	3
	GO:0032432	actin filament bundle	6/281	97/28804	0.000384273	0.00320227	0.00265988	Myh7/Acta1/Ldb3/Xirp2/Fhl3/Myh6	6
	GO:0042641	actomyosin	6/281	97/28804	0.000384273	0.00320227	0.00265988	Myh7/Acta1/Ldb3/Xirp2/Fhl3/Myh6	6
	GO:0031941	filamentous actin	4/281	38/28804	0.000504022	0.00407665	0.00338615	Myo18b/Smtnl1/Ldb3/Smtnl2	4
	GO:0001518	voltage-gated sodium channel complex	3/281	17/28804	0.000564445	0.00443492	0.00368374	Scn4a/Scn4b/Scn1b	3
	GO:0043679	axon terminus	8/281	194/28804	0.000669874	0.00511709	0.00425037	Mylk2/Slc8a3/Ucn/Kcnc4/Crhr2/Casr/Rab3a/Pnmt	8
	GO:0005891	voltage-gated calcium channel complex	4/281	42/28804	0.000741273	0.00550946	0.00457628	Cacna1s/Cacng6/Cacng1/Stac3	4
	GO:0044306	neuron projection terminus	8/281	215/28804	0.00129893	0.00940012	0.00780795	Mylk2/Slc8a3/Ucn/Kcnc4/Crhr2/Casr/Rab3a/Pnmt	8
	GO:0044304	main axon	5/281	84/28804	0.00140479	0.00990554	0.00822776	Ank1/Ucn/Crhr2/Scn1b/Pnmt	5
	GO:0030864	cortical actin cytoskeleton	5/281	86/28804	0.00155994	0.0107246	0.00890809	Myh2/Pvalb/Actn3/Actn2/Gys2	5
	GO:0034706	sodium channel complex	3/281	28/28804	0.00251221	0.0168502	0.0139961	Scn4a/Scn4b/Scn1b	3
	GO:1990454	L-type voltage-gated calcium channel complex	2/281	10/28804	0.00405265	0.0265352	0.0220407	Cacng6/Cacng1	2
	GO:0005890	sodium:potassium-exchanging ATPase complex	2/281	11/28804	0.00492145	0.0314744	0.0261433	Atp1a2/Atp1b4	2
	GO:0008076	voltage-gated potassium channel complex	4/281	76/28804	0.00656346	0.0410216	0.0340734	Kcna7/Lrrc38/Kcnc4/Kcng4	4
	GO:0005916	fascia adherens	2/281	13/28804	0.00689033	0.0421076	0.0349755	Nrap/Des	2
	GO:0090533	cation-transporting ATPase complex	2/281	14/28804	0.00798726	0.0477499	0.0396621	Atp1a2/Atp1b4	2
	GO_MF_DOWN DEGs
	ID	Description	Gene Ratio	Bg Ratio	P value	P Adj	q value	Gene ID	Count
	GO:0005201	extracellular matrix structural constituent	25/603	150/28404	1.50176e-15	9.17574e-13	6.81324e-13	Fga/Umod/Gp2/Lamb3/Lamc2/Dmbt1/Fgb/Slit2/Tnc/Fgg/Col4a5/Col12a1/Col7a1/Postn/Col16a1/Col17a1/Col8a2/Fbn2/Col9a1/Col4a6/Lama1/Col9a3/Col9a2/Col11a1/Col2a1	25
	GO:0034987	immunoglobulin receptor binding	20/603	141/28404	2.23953e-11	3.45499e-09	2.56542e-09	Ighv5-9-1/Ighv5-12/Ighv1-7/Ighv6-6/Ighv1-75/Ighv14-2/Ighv1-64/Ighv14-1/Ighv3-6/Ighv9-3/Ighv6-3/Ighv1-12/Ighv1-53/Ighv1-63/Ighv1-50/Ighg1/Ighv1-11/Ighg2c/Ighv1-52/Ighv1-61	20
	GO:0015267	channel activity	37/603	483/28404	2.26186e-11	3.45499e-09	2.56542e-09	Catsper1/Gria1/Clca3b/Slc26a7/Gabra4/Aqp6/Clcnka/Kcnk16/Scnn1g/Rhbg/Ano7/Kcnd2/Apol7a/Aqp2/Lrrc26/Slc1a4/Kcnh1/Clca1/Gjb6/Scnn1b/Kcnk1/Gjb3/Scnn1a/Apol9a/Gjb2/Abcc8/Piezo2/Ano1/Tmc4/Gjb4/Trpv6/Clic6/Gabrp/Ano9/Clca3a2/Aqp5/Cldn4	37
	GO:0022803	passive transmembrane transporter activity	37/603	483/28404	2.26186e-11	3.45499e-09	2.56542e-09	Catsper1/Gria1/Clca3b/Slc26a7/Gabra4/Aqp6/Clcnka/Kcnk16/Scnn1g/Rhbg/Ano7/Kcnd2/Apol7a/Aqp2/Lrrc26/Slc1a4/Kcnh1/Clca1/Gjb6/Scnn1b/Kcnk1/Gjb3/Scnn1a/Apol9a/Gjb2/Abcc8/Piezo2/Ano1/Tmc4/Gjb4/Trpv6/Clic6/Gabrp/Ano9/Clca3a2/Aqp5/Cldn4	37
	GO:0030280	structural constituent of skin epidermis	11/603	37/28404	1.86924e-10	2.20972e-08	1.64078e-08	Krt77/Krt78/Krt75/Krt88/Krt4/Krt6a/Krt79/Sprr1a/Krt7/Krt5/Krt8	11
	GO:0005254	chloride channel activity	15/603	83/28404	2.16994e-10	2.20972e-08	1.64078e-08	Clca3b/Slc26a7/Gabra4/Clcnka/Ano7/Apol7a/Slc1a4/Clca1/Apol9a/Ano1/Clic6/Gabrp/Ano9/Clca3a2/Cldn4	15
	GO:0005253	anion channel activity	15/603	94/28404	1.33726e-09	1.16724e-07	8.66707e-08	Clca3b/Slc26a7/Gabra4/Clcnka/Ano7/Apol7a/Slc1a4/Clca1/Apol9a/Ano1/Clic6/Gabrp/Ano9/Clca3a2/Cldn4	15
	GO:0015108	chloride transmembrane transporter activity	16/603	114/28404	2.63829e-09	1.7673e-07	1.31227e-07	Clca3b/Slc26a7/Gabra4/Slc12a1/Clcnka/Ano7/Apol7a/Slc1a4/Clca1/Apol9a/Ano1/Clic6/Gabrp/Ano9/Clca3a2/Cldn4	16
	GO:0050839	cell adhesion molecule binding	26/603	308/28404	2.95571e-09	1.7673e-07	1.31227e-07	Adam18/Fga/Arvcf/Cdhr2/Cntn5/Ibsp/Cdh18/Ptprz1/Cdh3/Fgb/Itgb2l/Ptprf/Olfm4/Fermt1/Fgg/Postn/Col16a1/Cxadr/Dsp/Cdh1/Ptk7/Spp1/Ptn/Pkp1/Epcam/Cldn7	26
	GO:0030414	peptidase inhibitor activity	22/603	224/28404	3.06401e-09	1.7673e-07	1.31227e-07	Serpinb6e/Gm7298/Wfdc5/Cst10/Spink5/Wfdc21/Pzp/Hc/Serpinb11/A2m/Timp1/Ltf/Col7a1/Wap/R3hdml/Slpi/Spint1/Itih2/Serpinb5/Wfdc2/Csn2/Wfdc18	22
	GO:0015103	inorganic anion transmembrane transporter activity	18/603	149/28404	3.18171e-09	1.7673e-07	1.31227e-07	Clca3b/Slc26a7/Gabra4/Aqp6/Slc12a1/Clcnka/Ano7/Apol7a/Slc1a4/Clca1/Apol9a/Ano1/Clic6/Gabrp/Ano9/Clca3a2/Slc5a5/Cldn4	18
	GO:0003823	antigen binding	22/603	233/28404	6.36835e-09	3.24255e-07	2.40768e-07	H2-M10.6/Gp2/Ighv5-9-1/Ighv5-12/Ighv1-7/Ighv6-6/Ighv1-75/Ighv14-2/Ighv1-64/Ighv14-1/Ighv3-6/Ighv9-3/Ighv6-3/Ighv1-12/Ighv1-53/Ighv1-63/Ighv1-50/Ighg1/Ighv1-11/Ighg2c/Ighv1-52/Ighv1-61	22
	GO:0004866	endopeptidase inhibitor activity	21/603	216/28404	8.37343e-09	3.93551e-07	2.92223e-07	Serpinb6e/Gm7298/Wfdc5/Cst10/Spink5/Wfdc21/Pzp/Hc/Serpinb11/A2m/Timp1/Ltf/Col7a1/Wap/Slpi/Spint1/Itih2/Serpinb5/Wfdc2/Csn2/Wfdc18	21
	GO:0061134	peptidase regulator activity	23/603	266/28404	1.54051e-08	6.7232e-07	4.99216e-07	Serpinb6e/Gm7298/Wfdc5/Cst10/Spink5/Wfdc21/Pzp/Hc/Serpinb11/A2m/Timp1/Prss22/Ltf/Col7a1/Wap/R3hdml/Slpi/Spint1/Itih2/Serpinb5/Wfdc2/Csn2/Wfdc18	23
	GO:0005216	ion channel activity	30/603	439/28404	2.4773e-08	1.00909e-06	7.49275e-07	Catsper1/Gria1/Clca3b/Slc26a7/Gabra4/Clcnka/Kcnk16/Scnn1g/Rhbg/Ano7/Kcnd2/Apol7a/Lrrc26/Slc1a4/Kcnh1/Clca1/Scnn1b/Kcnk1/Scnn1a/Apol9a/Abcc8/Piezo2/Ano1/Tmc4/Trpv6/Clic6/Gabrp/Ano9/Clca3a2/Cldn4	30
	GO:0061135	endopeptidase regulator activity	21/603	232/28404	2.94272e-08	1.12375e-06	8.34416e-07	Serpinb6e/Gm7298/Wfdc5/Cst10/Spink5/Wfdc21/Pzp/Hc/Serpinb11/A2m/Timp1/Ltf/Col7a1/Wap/Slpi/Spint1/Itih2/Serpinb5/Wfdc2/Csn2/Wfdc18	21
	GO:0008509	anion transmembrane transporter activity	24/603	300/28404	3.36751e-08	1.21032e-06	8.98697e-07	Clca3b/Slc26a7/Slc6a14/Gabra4/Aqp6/Slc12a1/Clcnka/Slc13a3/Ano7/Slc13a2/Apol7a/Slc1a4/Clca1/Slc44a4/Apol9a/Ano1/Clic6/Slco1a5/Slc5a8/Gabrp/Ano9/Clca3a2/Slc5a5/Cldn4	24
	GO:0030020	extracellular matrix structural constituent conferring tensile strength	9/603	38/28404	7.76861e-08	2.63701e-06	1.95805e-06	Col4a5/Col12a1/Col7a1/Col16a1/Col4a6/Col9a3/Col9a2/Col11a1/Col2a1	9
	GO:0004857	enzyme inhibitor activity	28/603	415/28404	9.45923e-08	3.04189e-06	2.25869e-06	Serpinb6e/Gm7298/Wfdc5/Cst10/Ppp1r14d/Pinlyp/Spink5/Wfdc21/Pzp/Hc/Serpinb11/A2m/Timp1/Slit2/Angptl4/Ltf/Dgki/Col7a1/Wap/R3hdml/Slpi/Spint1/Itih2/Serpinb5/Ptn/Wfdc2/Csn2/Wfdc18	28
	GO:0004867	serine-type endopeptidase inhibitor activity	15/603	130/28404	1.2052e-07	3.6819e-06	2.73391e-06	Serpinb6e/Wfdc5/Spink5/Wfdc21/Pzp/Serpinb11/A2m/Col7a1/Wap/Slpi/Spint1/Itih2/Serpinb5/Wfdc2/Wfdc18	15
	GO:0005539	glycosaminoglycan binding	20/603	233/28404	1.49951e-07	4.36287e-06	3.23955e-06	Pglyrp3/Ang4/Pglyrp4/Lipc/Liph/Defb15/Lamc2/Saa1/Dmbt1/Reg3g/Slit2/Ptprf/Rspo1/Ltf/Acan/Postn/Itih2/Ptn/Fgfr2/Col11a1	20
	GO:0022853	active ion transmembrane transporter activity	19/603	252/28404	2.17628e-06	6.04414e-05	4.48794e-05	Slc26a7/Slc10a5/Slc12a1/Atp12a/Slc13a3/Atp7b/Atp13a4/Slc34a2/Abcc8/Atp6v0a4/Slc5a1/Atp2c2/Slc5a9/Slc28a3/Slco1a5/Slc5a8/Atp6v1b1/Slc5a5/Atp6v1c2	19
	GO:0015081	sodium ion transmembrane transporter activity	14/603	146/28404	3.00225e-06	7.97553e-05	5.92205e-05	Slc10a5/Slc12a1/Atp12a/Slc13a3/Scnn1g/Scnn1b/Kcnk1/Scnn1a/Slc34a2/Slc5a1/Slc5a9/Slc28a3/Slc5a8/Slc5a5	14
	GO:0005506	iron ion binding	15/603	171/28404	4.07849e-06	0.000103831	7.70977e-05	Cyp2c55/Cyp24a1/Cyp2d11/Cyp26a1/Cyp2d9/Bbox1/Cyp1b1/Ltf/Meltf/Cyp2d10/Tph1/Trf/Alox12e/Cyp3a57/Lcn2	15
	GO:0062187	anandamide 8,9 epoxidase activity	5/603	13/28404	4.74021e-06	0.000111395	8.27138e-05	Cyp2d12/Cyp2d34/Cyp2d11/Cyp2d9/Cyp2d10	5
	GO:0062188	anandamide 11,12 epoxidase activity	5/603	13/28404	4.74021e-06	0.000111395	8.27138e-05	Cyp2d12/Cyp2d34/Cyp2d11/Cyp2d9/Cyp2d10	5
	GO:0062186	anandamide epoxidase activity	5/603	14/28404	7.24478e-06	0.000158091	0.000117387	Cyp2d12/Cyp2d34/Cyp2d11/Cyp2d9/Cyp2d10	5
	GO:0062189	anandamide 14,15 epoxidase activity	5/603	14/28404	7.24478e-06	0.000158091	0.000117387	Cyp2d12/Cyp2d34/Cyp2d11/Cyp2d9/Cyp2d10	5
	GO:0019829	ATPase-coupled cation transmembrane transporter activity	8/603	52/28404	1.30205e-05	0.000274328	0.000203696	Atp12a/Atp7b/Atp13a4/Abcc8/Atp6v0a4/Atp2c2/Atp6v1b1/Atp6v1c2	8
	GO:0046873	metal ion transmembrane transporter activity	24/603	422/28404	1.44572e-05	0.000294445	0.000218634	Catsper1/Slc10a5/Slc12a1/Atp12a/Kcnk16/Slc13a3/Scnn1g/Kcnd2/Lrrc26/Atp7b/Kcnh1/Scnn1b/Kcnk1/Scnn1a/Atp13a4/Slc34a2/Abcc8/Trpv6/Slc5a1/Atp2c2/Slc5a9/Slc28a3/Slc5a8/Slc5a5	24
	GO:0015370	solute:sodium symporter activity	9/603	69/28404	1.50522e-05	0.000296674	0.000220288	Slc10a5/Slc12a1/Slc13a3/Slc34a2/Slc5a1/Slc5a9/Slc28a3/Slc5a8/Slc5a5	9
	GO:0008201	heparin binding	14/603	170/28404	1.74448e-05	0.000333087	0.000247326	Ang4/Lipc/Liph/Defb15/Lamc2/Saa1/Slit2/Ptprf/Rspo1/Ltf/Postn/Ptn/Fgfr2/Col11a1	14
	GO:0043394	proteoglycan binding	8/603	55/28404	1.99225e-05	0.000368868	0.000273895	Hpse2/Lipc/Ctsr/Slit2/Tnc/Ptprf/Ptn/Col2a1	8
	GO:0022836	gated channel activity	20/603	328/28404	2.78204e-05	0.000499949	0.000371226	Catsper1/Gria1/Clca3b/Gabra4/Clcnka/Kcnk16/Scnn1g/Kcnd2/Lrrc26/Kcnh1/Clca1/Scnn1b/Kcnk1/Scnn1a/Piezo2/Ano1/Tmc4/Clic6/Gabrp/Clca3a2	20
	GO:0022804	active transmembrane transporter activity	22/603	403/28404	5.9846e-05	0.00104474	0.000775748	Slc26a7/Slc6a14/Slc10a5/Slc12a1/Atp12a/Slc13a3/Slc13a2/Atp7b/Slc1a4/Atp13a4/Slc34a2/Abcc8/Atp6v0a4/Slc5a1/Atp2c2/Slc5a9/Slc28a3/Slco1a5/Slc5a8/Atp6v1b1/Slc5a5/Atp6v1c2	22
	GO:0015293	symporter activity	12/603	146/28404	6.99873e-05	0.00116776	0.000867093	Slc6a14/Slc10a5/Slc12a1/Slc13a3/Slc13a2/Slc1a4/Slc34a2/Slc5a1/Slc5a9/Slc28a3/Slc5a8/Slc5a5	12
	GO:0004252	serine-type endopeptidase activity	14/603	193/28404	7.07154e-05	0.00116776	0.000867093	Klk6/Proc/Gzmd/Gzme/Hpn/Hgf/Tmprss4/Prss22/Prss8/Tmprss13/Ltf/Mmp13/Hp/Tmprss2	14
	GO:0004497	monooxygenase activity	12/603	152/28404	0.000103103	0.00165779	0.00123096	Cyp2c55/Cyp2d12/Cyp2d34/Cyp24a1/Cyp2d11/Cyp26a1/Cyp2d9/Cyp1b1/Moxd1/Cyp2d10/Tph1/Cyp3a57	12
	GO:1901681	sulfur compound binding	17/603	284/28404	0.00013616	0.00213318	0.00158394	Ang4/Hpse2/Lipc/Liph/Defb15/Lamc2/Saa1/Dmbt1/Slit2/Ptprf/Rspo1/Ltf/Postn/Cbs/Ptn/Fgfr2/Col11a1	17
	GO:0008395	steroid hydroxylase activity	8/603	73/28404	0.000157478	0.00225714	0.00167599	Cyp2c55/Cyp2d12/Cyp2d34/Cyp2d11/Cyp2d9/Cyp1b1/Cyp2d10/Cyp3a57	8
	GO:0019842	vitamin binding	11/603	136/28404	0.000160338	0.00225714	0.00167599	Aadat/Agxt2/Sptlc3/Stra6/Crabp1/Rbp1/Bspry/Crabp2/Cbs/Vdr/Ttpa	11
	GO:0005229	intracellular calcium activated chloride channel activity	4/603	14/28404	0.000169932	0.00225714	0.00167599	Clca3b/Clca1/Ano1/Clca3a2	4
	GO:0005372	water transmembrane transporter activity	4/603	14/28404	0.000169932	0.00225714	0.00167599	Aqp6/Aqp2/Slc5a1/Aqp5	4
	GO:0019215	intermediate filament binding	4/603	14/28404	0.000169932	0.00225714	0.00167599	Evpl/Fam83h/Eppk1/Krt14	4
	GO:0019841	retinol binding	4/603	14/28404	0.000169932	0.00225714	0.00167599	Stra6/Crabp1/Rbp1/Crabp2	4
	GO:0061778	intracellular chloride channel activity	4/603	14/28404	0.000169932	0.00225714	0.00167599	Clca3b/Clca1/Ano1/Clca3a2	4
	GO:0020037	heme binding	12/603	161/28404	0.00017763	0.00230919	0.00171463	Cyp2c55/Cyp2d12/Cyp2d34/Cyp24a1/Cyp2d11/Cyp26a1/Stc2/Ido1/Cyp2d9/Cyp1b1/Cbs/Cyp2d10	12
	GO:0008236	serine-type peptidase activity	14/603	211/28404	0.000181704	0.00231294	0.00171742	Klk6/Proc/Gzmd/Gzme/Hpn/Hgf/Tmprss4/Prss22/Prss8/Tmprss13/Ltf/Mmp13/Hp/Tmprss2	14
	GO:0015294	solute:cation symporter activity	9/603	96/28404	0.000207579	0.00258838	0.00192194	Slc10a5/Slc12a1/Slc13a3/Slc34a2/Slc5a1/Slc5a9/Slc28a3/Slc5a8/Slc5a5	9
	GO:0017171	serine hydrolase activity	14/603	216/28404	0.000231479	0.00282868	0.00210037	Klk6/Proc/Gzmd/Gzme/Hpn/Hgf/Tmprss4/Prss22/Prss8/Tmprss13/Ltf/Mmp13/Hp/Tmprss2	14
	GO:0046906	tetrapyrrole binding	12/603	170/28404	0.000293996	0.00352218	0.00261532	Cyp2c55/Cyp2d12/Cyp2d34/Cyp24a1/Cyp2d11/Cyp26a1/Stc2/Ido1/Cyp2d9/Cyp1b1/Cbs/Cyp2d10	12
	GO:0016918	retinal binding	4/603	17/28404	0.000384077	0.00440598	0.00327156	Stra6/Crabp1/Rbp1/Crabp2	4
	GO:0015662	P-type ion transporter activity	5/603	30/28404	0.000389399	0.00440598	0.00327156	Atp12a/Atp7b/Atp13a4/Atp6v0a4/Atp2c2	5
	GO:0140358	P-type transmembrane transporter activity	5/603	30/28404	0.000389399	0.00440598	0.00327156	Atp12a/Atp7b/Atp13a4/Atp6v0a4/Atp2c2	5
	GO:0045296	cadherin binding	7/603	69/28404	0.000648641	0.00720581	0.00535051	Arvcf/Cdh18/Cdh3/Olfm4/Cdh1/Pkp1/Epcam	7
	GO:0005501	retinoid binding	5/603	34/28404	0.000709035	0.00773608	0.00574425	Cyp26a1/Stra6/Crabp1/Rbp1/Crabp2	5
	GO:0001530	lipopolysaccharide binding	5/603	35/28404	0.000812906	0.00871378	0.00647022	Defb15/Dmbt1/Sftpd/Cd14/Ltf	5
	GO:0015291	secondary active transmembrane transporter activity	14/603	247/28404	0.000881747	0.00928875	0.00689715	Slc26a7/Slc6a14/Slc10a5/Slc12a1/Slc13a3/Slc13a2/Slc1a4/Slc34a2/Slc5a1/Slc5a9/Slc28a3/Slco1a5/Slc5a8/Slc5a5	14
	GO:0015280	ligand-gated sodium channel activity	3/603	10/28404	0.00102206	0.0105244	0.00781467	Scnn1g/Scnn1b/Scnn1a	3
	GO:0019840	isoprenoid binding	5/603	37/28404	0.00105414	0.0105244	0.00781467	Cyp26a1/Stra6/Crabp1/Rbp1/Crabp2	5
	GO:0070330	aromatase activity	5/603	37/28404	0.00105414	0.0105244	0.00781467	Cyp2c55/Cyp2d11/Cyp2d9/Cyp1b1/Cyp2d10	5
	GO:0004806	triglyceride lipase activity	4/603	22/28404	0.00108517	0.0105244	0.00781467	Lipc/Liph/Cel/Plb1	4
	GO:0005243	gap junction channel activity	4/603	22/28404	0.00108517	0.0105244	0.00781467	Gjb6/Gjb3/Gjb2/Gjb4	4
	GO:0016712	oxidoreductase activity, acting on paired donors, with incorporation or reduction of molecular oxygen, reduced flavin or flavoprotein as one donor, and incorporation of one atom of oxygen	7/603	76/28404	0.00115737	0.0110493	0.0082044	Cyp2c55/Cyp2d12/Cyp2d34/Cyp2d11/Cyp2d9/Cyp1b1/Cyp2d10	7
	GO:0016705	oxidoreductase activity, acting on paired donors, with incorporation or reduction of molecular oxygen	13/603	228/28404	0.0012599	0.0118431	0.00879381	Cyp2c55/Cyp2d12/Cyp2d34/Cyp24a1/Cyp2d11/Cyp26a1/Cyp2d9/Bbox1/Cyp1b1/Moxd1/Cyp2d10/Tph1/Cyp3a57	13
	GO:0015250	water channel activity	3/603	11/28404	0.00138323	0.0126143	0.00936644	Aqp6/Aqp2/Aqp5	3
	GO:0016813	hydrolase activity, acting on carbon-nitrogen (but not peptide) bonds, in linear amidines	3/603	11/28404	0.00138323	0.0126143	0.00936644	Padi4/Arg1/Arg2	3
	GO:0009678	pyrophosphate hydrolysis-driven proton transmembrane transporter activity	4/603	24/28404	0.00152429	0.0136962	0.0101698	Atp12a/Atp6v0a4/Atp6v1b1/Atp6v1c2	4
	GO:0022839	ion gated channel activity	5/603	41/28404	0.00169045	0.0149691	0.011115	Catsper1/Clca3b/Clca1/Ano1/Clca3a2	5
	GO:0042626	ATPase-coupled transmembrane transporter activity	8/603	105/28404	0.00181076	0.0154949	0.0115054	Atp12a/Atp7b/Atp13a4/Abcc8/Atp6v0a4/Atp2c2/Atp6v1b1/Atp6v1c2	8
	GO:0004468	lysine N-acetyltransferase activity, acting on acetyl phosphate as donor	3/603	12/28404	0.00181534	0.0154949	0.0115054	Nat8f5/Nat8f2/Nat8	3
	GO:0004175	endopeptidase activity	20/603	453/28404	0.00182591	0.0154949	0.0115054	Adam18/Klk6/Capn9/Proc/Gzmd/Gzme/Ctsr/Pappa/Hpn/Hgf/Tmprss4/Prss22/Adamts3/Prss8/Tmprss13/Ltf/Mmp13/Hp/Capn8/Tmprss2	20
	GO:0016709	oxidoreductase activity, acting on paired donors, with incorporation or reduction of molecular oxygen, NAD(P)H as one donor, and incorporation of one atom of oxygen	6/603	64/28404	0.00235984	0.0197515	0.014666	Cyp2d12/Cyp2d34/Cyp2d11/Cyp26a1/Cyp2d9/Cyp2d10	6
	GO:0005310	dicarboxylic acid transmembrane transporter activity	4/603	29/28404	0.00313339	0.0258716	0.0192104	Slc26a7/Slc13a3/Slc13a2/Slc1a4	4
	GO:0008401	retinoic acid 4-hydroxylase activity	3/603	15/28404	0.00358064	0.0284126	0.0210971	Cyp2c55/Cyp26a1/Cyp3a57	3
	GO:0015556	C4-dicarboxylate transmembrane transporter activity	3/603	15/28404	0.00358064	0.0284126	0.0210971	Slc13a3/Slc13a2/Slc1a4	3
	GO:0061783	peptidoglycan muralytic activity	3/603	15/28404	0.00358064	0.0284126	0.0210971	Pglyrp3/Pglyrp4/Lalba	3
	GO:0005125	cytokine activity	12/603	228/28404	0.00367284	0.0287706	0.021363	Inhbc/Ifna2/Wnt9b/Gdf5/Timp1/Cxcl15/Wnt7b/Inhbb/Wnt5b/Sectm1b/Il17b/Spp1	12
	GO:1901618	organic hydroxy compound transmembrane transporter activity	5/603	49/28404	0.00374436	0.0289595	0.0215033	Slc10a5/Aqp2/Stra6/Slco1a5/Slc5a8	5
	GO:0048306	calcium-dependent protein binding	7/603	94/28404	0.00391291	0.0298848	0.0221903	Syt6/Syn2/Syt8/A2m/S100a14/Efcab1/Mmp13	7
	GO:0001972	retinoic acid binding	3/603	16/28404	0.004338	0.0327225	0.0242973	Cyp26a1/Crabp1/Crabp2	3
	GO:0022829	wide pore channel activity	4/603	32/28404	0.00451231	0.0328217	0.024371	Gjb6/Gjb3/Gjb2/Gjb4	4
	GO:0046875	ephrin receptor binding	4/603	32/28404	0.00451231	0.0328217	0.024371	Efna3/Efna4/Ngef/Efna5	4
	GO:0050699	WW domain binding	4/603	32/28404	0.00451231	0.0328217	0.024371	Scnn1g/Scnn1b/Scnn1a/Trp63	4
	GO:0008083	growth factor activity	9/603	149/28404	0.00466451	0.0335296	0.0248967	Inhbc/Gdf5/Hgf/Timp1/Pdgfc/Inhbb/Mia/Nrtn/Ptn	9
	GO:0004620	phospholipase activity	7/603	98/28404	0.00492084	0.0349609	0.0259594	Pla2g2f/Lipc/Liph/Smpdl3b/Cel/Plb1/Plch2	7
	GO:0042834	peptidoglycan binding	3/603	17/28404	0.00518527	0.0364161	0.02704	Pglyrp3/Pglyrp4/Reg3g	3
	GO:0019838	growth factor binding	9/603	152/28404	0.00530701	0.0368476	0.0273603	Pzp/Ptprz1/Erbb4/A2m/Nkd2/Igfbp2/Ptn/Fgfr2/Col2a1	9
	GO:0005261	cation channel activity	15/603	334/28404	0.00554003	0.0380332	0.0282407	Catsper1/Gria1/Kcnk16/Scnn1g/Rhbg/Kcnd2/Lrrc26/Kcnh1/Scnn1b/Kcnk1/Scnn1a/Abcc8/Piezo2/Ano1/Trpv6	15
	GO:0005178	integrin binding	9/603	155/28404	0.00601598	0.0408418	0.0303262	Adam18/Ibsp/Ptprz1/Itgb2l/Fermt1/Col16a1/Cxadr/Spp1/Ptn	9
	GO:0050840	extracellular matrix binding	5/603	57/28404	0.00716162	0.0480851	0.0357045	Dmbt1/Slit2/Lypd3/Lrrc15/Spp1	5
	GO_MF_UP DEGs
	ID	Description	Gene Ratio	Bg Ratio	P value	P Adj	q value	Gene ID	Count
	GO:0003779	actin binding	39/277	447/28404	1.63387e-25	7.05831e-23	5.33157e-23	Myh2/Myh1/Myh4/Ttn/Tnnt3/Myl3/Neb/Myh7/Actn3/Myom2/Mybpc2/Myoz1/Myl2/Nrap/Lmod3/Tnni2/Tnni1/Myo18b/Adssl1/Myot/Mypn/Ldb3/Xirp2/Tnnc2/Tnnc1/Fhl3/Myom1/Myoz2/Flnc/Myom3/Actn2/Myoz3/Tpm2/Tmod4/Kbtbd13/Tmsb15a/Tmod1/Myh6/Myh13	39
	GO:0051015	actin filament binding	23/277	222/28404	4.37117e-17	9.44172e-15	7.1319e-15	Myh2/Myh1/Myh4/Ttn/Neb/Myh7/Actn3/Myom2/Nrap/Myo18b/Adssl1/Xirp2/Tnnc2/Tnnc1/Myom1/Myom3/Actn2/Tpm2/Tmod4/Kbtbd13/Tmod1/Myh6/Myh13	23
	GO:0005523	tropomyosin binding	7/277	15/28404	4.68134e-11	6.74114e-09	5.09199e-09	Tnnt3/Lmod3/Smtnl1/Smtnl2/Tnnt1/Tmod4/Tmod1	7
	GO:0046873	metal ion transmembrane transporter activity	20/277	422/28404	7.6871e-09	8.30207e-07	6.27105e-07	Scn4a/Ryr1/Atp2a1/Cacna1s/Kcna7/Tmem38a/Lrrc38/Cacng6/Slc8a3/Scn4b/Cacng1/Kcnc4/Atp1a2/Scn1b/Slc9a2/Kcng4/Atp2b3/Pkdrej/Slc30a3/Slc28a1	20
	GO:0005200	structural constituent of cytoskeleton	9/277	69/28404	2.38165e-08	2.05774e-06	1.55434e-06	Ttn/Mybpc1/Myom2/Mybpc2/Des/Tuba8/Myom1/Tpm2/Camk2b	9
	GO:0008307	structural constituent of muscle	6/277	21/28404	3.91036e-08	2.81546e-06	2.12669e-06	Obscn/Ttn/Tcap/Myl1/Mylpf/Capn3	6
	GO:0005516	calmodulin binding	13/277	191/28404	5.5415e-08	3.05851e-06	2.31028e-06	Myh1/Obscn/Ryr1/Myh4/Ttn/Myh7/Cacna1s/Mylk2/Camk2a/Smtnl1/Slc8a3/Camk2b/Myh6	13
	GO:0000146	microfilament motor activity	7/277	37/28404	6.23449e-08	3.05851e-06	2.31028e-06	Myh2/Myh1/Myh4/Myh7/Actc1/Myh6/Myh13	7
	GO:0031432	titin binding	5/277	12/28404	6.37189e-08	3.05851e-06	2.31028e-06	Obscn/Tcap/Actn2/Capn3/Ankrd23	5
	GO:0005216	ion channel activity	19/277	439/28404	7.70177e-08	3.32717e-06	2.51321e-06	Scn4a/Ryr1/Cacna1s/Kcna7/Tmem38a/Lrrc38/Clcn1/Cacng6/Scn4b/Ano5/Cacng1/Kcnc4/Scn1b/Otop1/Chrna10/Chrne/Kcng4/Pkdrej/Chrm5	19
	GO:0022836	gated channel activity	16/277	328/28404	1.69853e-07	6.67058e-06	5.03869e-06	Scn4a/Ryr1/Cacna1s/Kcna7/Tmem38a/Lrrc38/Clcn1/Cacng6/Scn4b/Cacng1/Kcnc4/Scn1b/Chrna10/Chrne/Kcng4/Chrm5	16
	GO:0005261	cation channel activity	16/277	334/28404	2.16946e-07	7.81007e-06	5.89942e-06	Scn4a/Ryr1/Cacna1s/Kcna7/Tmem38a/Lrrc38/Cacng6/Scn4b/Cacng1/Kcnc4/Scn1b/Otop1/Chrna10/Chrne/Kcng4/Pkdrej	16
	GO:0044325	transmembrane transporter binding	11/277	148/28404	2.44298e-07	8.11821e-06	6.13217e-06	Trdn/Actn3/Tcap/Lrrc38/Hrc/Scn4b/Ank1/Actn2/Scn1b/Casr/Kcng4	11
	GO:0015267	channel activity	19/277	483/28404	3.34486e-07	9.63321e-06	7.27655e-06	Scn4a/Ryr1/Cacna1s/Kcna7/Tmem38a/Lrrc38/Clcn1/Cacng6/Scn4b/Ano5/Cacng1/Kcnc4/Scn1b/Otop1/Chrna10/Chrne/Kcng4/Pkdrej/Chrm5	19
	GO:0022803	passive transmembrane transporter activity	19/277	483/28404	3.34486e-07	9.63321e-06	7.27655e-06	Scn4a/Ryr1/Cacna1s/Kcna7/Tmem38a/Lrrc38/Clcn1/Cacng6/Scn4b/Ano5/Cacng1/Kcnc4/Scn1b/Otop1/Chrna10/Chrne/Kcng4/Pkdrej/Chrm5	19
	GO:0051393	alpha-actinin binding	6/277	30/28404	3.97477e-07	1.07319e-05	8.10643e-06	Ttn/Nrap/Myot/Mypn/Ldb3/Xirp2	6
	GO:0005244	voltage-gated ion channel activity	12/277	197/28404	5.97558e-07	1.51357e-05	1.14329e-05	Scn4a/Ryr1/Cacna1s/Kcna7/Lrrc38/Clcn1/Cacng6/Scn4b/Cacng1/Kcnc4/Scn1b/Kcng4	12
	GO:0022832	voltage-gated channel activity	12/277	198/28404	6.30655e-07	1.51357e-05	1.14329e-05	Scn4a/Ryr1/Cacna1s/Kcna7/Lrrc38/Clcn1/Cacng6/Scn4b/Cacng1/Kcnc4/Scn1b/Kcng4	12
	GO:0042805	actinin binding	6/277	40/28404	2.36764e-06	5.38327e-05	4.06631e-05	Ttn/Nrap/Myot/Mypn/Ldb3/Xirp2	6
	GO:0051371	muscle alpha-actinin binding	4/277	14/28404	8.20347e-06	0.000177195	0.000133846	Ttn/Nrap/Mypn/Ldb3	4
	GO:0003774	cytoskeletal motor activity	8/277	109/28404	1.19998e-05	0.000246854	0.000186464	Myh2/Myh1/Myh4/Myl3/Myh7/Actc1/Myh6/Myh13	8
	GO:0022853	active ion transmembrane transporter activity	11/277	252/28404	4.10003e-05	0.000805096	0.000608138	Atp2a1/Cox8b/Cox7a1/Cox6a2/Slc2a4/Slc8a3/Atp1a2/Slc25a4/Slc9a2/Atp2b3/Slc28a1	11
	GO:0015085	calcium ion transmembrane transporter activity	8/277	134/28404	5.3381e-05	0.00100263	0.000757351	Ryr1/Atp2a1/Cacna1s/Cacng6/Slc8a3/Cacng1/Atp2b3/Pkdrej	8
	GO:0015078	proton transmembrane transporter activity	7/277	112/28404	0.000117786	0.00212014	0.00160147	Cox8b/Cox7a1/Cox6a2/Slc2a4/Slc25a4/Slc9a2/Otop1	7
	GO:0003785	actin monomer binding	4/277	27/28404	0.000130156	0.0022491	0.00169888	Myl3/Myl2/Lmod3/Tmsb15a	4
	GO:0022804	active transmembrane transporter activity	13/277	403/28404	0.000182738	0.00303626	0.00229347	Atp2a1/Cox8b/Cox7a1/Cox6a2/Slc38a3/Slc2a4/Slc8a3/Atp1a2/Slc25a4/Slc9a2/Mfsd4b1/Atp2b3/Slc28a1	13
	GO:0048029	monosaccharide binding	6/277	91/28404	0.000271464	0.00434343	0.00328086	Pfkm/Aldoa/Slc2a5/Hk2/Gys2/Gck	6
	GO:0005536	glucose binding	3/277	14/28404	0.000308403	0.00475821	0.00359417	Hk2/Gys2/Gck	3
	GO:0008157	protein phosphatase 1 binding	4/277	34/28404	0.000325984	0.00485604	0.00366806	Smtnl1/Smtnl2/Ppp1r3a/Ppp1r3c	4
	GO:0070273	phosphatidylinositol-4-phosphate binding	4/277	37/28404	0.000453711	0.00653344	0.0049351	Obscn/Jph2/Pla2g4e/Gsdmc3	4
	GO:0015081	sodium ion transmembrane transporter activity	7/277	146/28404	0.000595737	0.00830188	0.00627091	Scn4a/Slc8a3/Scn4b/Atp1a2/Scn1b/Slc9a2/Slc28a1	7
	GO:0004129	cytochrome-c oxidase activity	3/277	18/28404	0.000671684	0.00906773	0.00684941	Cox8b/Cox7a1/Cox6a2	3
	GO:0022843	voltage-gated cation channel activity	7/277	150/28404	0.000699307	0.00915456	0.006915	Ryr1/Cacna1s/Kcna7/Lrrc38/Cacng1/Kcnc4/Kcng4	7
	GO:0016208	AMP binding	3/277	19/28404	0.000791893	0.00977423	0.00738307	Pygm/Pfkm/Prkag3	3
	GO:0016675	oxidoreductase activity, acting on a heme group of donors	3/277	19/28404	0.000791893	0.00977423	0.00738307	Cox8b/Cox7a1/Cox6a2	3
	GO:0017022	myosin binding	5/277	76/28404	0.0008937	0.0106768	0.00806485	Mybpc1/Mylk2/Ampd1/Actc1/Rab3a	5
	GO:0015079	potassium ion transmembrane transporter activity	7/277	157/28404	0.00091445	0.0106768	0.00806485	Kcna7/Tmem38a/Lrrc38/Kcnc4/Atp1a2/Slc9a2/Kcng4	7
	GO:0010314	phosphatidylinositol-5-phosphate binding	3/277	21/28404	0.00107136	0.0118674	0.00896415	Obscn/Jph2/Pla2g4e	3
	GO:0019200	carbohydrate kinase activity	3/277	21/28404	0.00107136	0.0118674	0.00896415	Pfkm/Hk2/Gck	3
	GO:0016791	phosphatase activity	9/277	266/28404	0.00127683	0.0137898	0.0104163	Plpp7/Dusp13/Lrrc30/Phospho1/Ppp1r3a/Ppp1r3c/Nt5c1a/Dusp27/Ptprq	9
	GO:0005355	glucose transmembrane transporter activity	3/277	23/28404	0.00140621	0.0144638	0.0109254	Slc2a4/Slc2a5/Mfsd4b1	3
	GO:0030506	ankyrin binding	3/277	23/28404	0.00140621	0.0144638	0.0109254	Obscn/Ttn/Flnc	3
	GO:0015149	hexose transmembrane transporter activity	3/277	24/28404	0.00159557	0.0160299	0.0121084	Slc2a4/Slc2a5/Mfsd4b1	3
	GO:0030246	carbohydrate binding	9/277	277/28404	0.00168629	0.0165563	0.012506	Pygm/Pfkm/Aldoa/Slc2a5/Ppp1r3a/Ppp1r3c/Hk2/Gys2/Gck	9
	GO:0005248	voltage-gated sodium channel activity	3/277	25/28404	0.00180016	0.0172815	0.0130538	Scn4a/Scn4b/Scn1b	3
	GO:0005546	phosphatidylinositol-4,5-bisphosphate binding	5/277	90/28404	0.00190396	0.0178807	0.0135063	Obscn/Jph2/Actn2/Pla2g4e/Gsdmc3	5
	GO:0015145	monosaccharide transmembrane transporter activity	3/277	26/28404	0.00202039	0.0185704	0.0140274	Slc2a4/Slc2a5/Mfsd4b1	3
	GO:0051119	sugar transmembrane transporter activity	3/277	27/28404	0.00225667	0.02031	0.0153414	Slc2a4/Slc2a5/Mfsd4b1	3
	GO:0051427	hormone receptor binding	3/277	29/28404	0.00277892	0.0244999	0.0185062	Ucn/Nppc/Vip	3
	GO:0005251	delayed rectifier potassium channel activity	3/277	30/28404	0.00306562	0.0254682	0.0192377	Kcna7/Kcnc4/Kcng4	3
	GO:0015662	P-type ion transporter activity	3/277	30/28404	0.00306562	0.0254682	0.0192377	Atp2a1/Atp1a2/Atp2b3	3
	GO:0140358	P-type transmembrane transporter activity	3/277	30/28404	0.00306562	0.0254682	0.0192377	Atp2a1/Atp1a2/Atp2b3	3
	GO:1901474	azole transmembrane transporter activity	2/277	10/28404	0.00404968	0.0329143	0.0248622	Slc38a3/Slc28a1	2
	GO:0015399	primary active transmembrane transporter activity	6/277	154/28404	0.00411429	0.0329143	0.0248622	Atp2a1/Cox8b/Cox7a1/Cox6a2/Atp1a2/Atp2b3	6
	GO:0004674	protein serine/threonine kinase activity	11/277	441/28404	0.00426854	0.0335274	0.0253253	Obscn/Ttn/Mylk2/Mylk4/Camk2a/Alpk3/Prkag3/Camk2b/Sbk2/Speg/Alpk2	11
	GO:0004623	phospholipase A2 activity	3/277	34/28404	0.00439074	0.0338714	0.0255851	Pnpla3/Pla2g4e/Pla2g4d	3
	GO:0005388	P-type calcium transporter activity	2/277	11/28404	0.00491786	0.0372722	0.0281539	Atp2a1/Atp2b3	2
	GO:1902936	phosphatidylinositol bisphosphate binding	5/277	115/28404	0.0054652	0.0407063	0.030748	Obscn/Jph2/Actn2/Pla2g4e/Gsdmc3	5
	GO:0005262	calcium channel activity	5/277	116/28404	0.00566692	0.0414934	0.0313424	Ryr1/Cacna1s/Cacng6/Cacng1/Pkdrej	5
	GO:0031402	sodium ion binding	2/277	12/28404	0.00586361	0.0419134	0.0316598	Atp1a2/Capn3	2
	GO:0015297	antiporter activity	4/277	74/28404	0.00596743	0.0419134	0.0316598	Slc38a3/Slc8a3/Slc25a4/Slc9a2	4
	GO:0015144	carbohydrate transmembrane transporter activity	3/277	38/28404	0.00601535	0.0419134	0.0316598	Slc2a4/Slc2a5/Mfsd4b1	3
	GO:0004721	phosphoprotein phosphatase activity	6/277	170/28404	0.00661208	0.04534	0.034248	Dusp13/Lrrc30/Ppp1r3a/Ppp1r3c/Dusp27/Ptprq	6
	GO:0005267	potassium channel activity	5/277	121/28404	0.00675478	0.0455948	0.0344405	Kcna7/Tmem38a/Lrrc38/Kcnc4/Kcng4	5
	GO:0016832	aldehyde-lyase activity	2/277	13/28404	0.00688534	0.045761	0.0345661	Aldoa/Hacl1	2
	Reactome_DOWN DEGs
	ID	Description	Gene Ratio	Bg Ratio	P value	P Adj	q value	Gene ID	Count
	R-MMU-1266738	Developmental Biology	43/283	447/8501	1.93079e-10	2.57439e-08	2.28985e-08	Krt77/Krt27/Krt31/Krt78/2310057N15Rik/Krt32/Krt16/Krt75/Cdsn/Lipk/Gm10024/Krt4/Spink5/Dsg3/Krt6a/Efna3/Evpl/Efna4/Lipm/Slit2/Boc/Sptbn2/Krt15/Krt79/Krt23/Ngef/Efna5/Perp/Dsp/Col9a1/Nrtn/Mapk13/Krt7/Col9a3/Pak3/Pkp1/Krt17/Krt19/Krt5/Krt14/Krt8/Krt18/Col2a1	43
	R-MMU-381426	Regulation of Insulin-like Growth Factor (IGF) transport and uptake by Insulin-like Growth Factor Binding Proteins (IGFBPs)	15/283	120/8501	9.60285e-06	0.000349195	0.000310599	Fga/Matn3/Proc/Apol7a/Pappa/Stc2/Timp1/Apol9a/Tnc/Igfbp2/Fgg/Meltf/Spp1/Trf/Itih2	15
	R-MMU-8866907	Activation of the TFAP2 (AP-2) family of transcription factors	5/283	11/8501	1.54666e-05	0.000515555	0.000458572	Tfap2a/Tfap2c/Tfap2b/Cited1/Cited4	5
	R-MMU-8864260	Transcriptional regulation by the AP-2 (TFAP2) family of transcription factors	5/283	21/8501	0.000517796	0.0115066	0.0102348	Tfap2a/Tfap2c/Tfap2b/Cited1/Cited4	5
	R-MMU-1500931	Cell-Cell communication	8/283	83/8501	0.00620384	0.091522	0.0814064	Cdh18/Cdh3/Sftpd/Nectin4/Col17a1/Cdh1/Krt5/Krt14	8
	R-MMU-9006934	Signaling by Receptor Tyrosine Kinases	23/283	395/8501	0.00631818	0.091522	0.0814064	Alk/Ptprz1/Erbb4/Muc20/Hpn/Hgf/Pdgfc/Tns4/Atp6v0a4/Kit/Col9a1/Mapk13/Galnt3/Spp1/Spint1/Ptn/Col9a3/Pak3/Fgfr2/Atp6v1b1/Atp6v1c2/Col11a1/Col2a1	23
	R-MMU-6806834	Signaling by MET	7/283	67/8501	0.00663534	0.091522	0.0814064	Muc20/Hpn/Hgf/Tns4/Spint1/Col11a1/Col2a1	7
	R-MMU-8957275	Post-translational protein phosphorylation	13/283	114/8501	9.97563e-05	0.00285018	0.00253516	Fga/Matn3/Proc/Apol7a/Stc2/Timp1/Apol9a/Tnc/Fgg/Meltf/Spp1/Trf/Itih2	13
	R-MMU-6809371	Formation of the cornified envelope	28/283	80/8501	6.93447e-22	2.77379e-19	2.46721e-19	Krt77/Krt27/Krt31/Krt78/Krt32/Krt16/Krt75/Cdsn/Lipk/Krt4/Spink5/Dsg3/Krt6a/Evpl/Lipm/Krt15/Krt79/Krt23/Perp/Dsp/Krt7/Pkp1/Krt17/Krt19/Krt5/Krt14/Krt8/Krt18	28
	R-MMU-6805567	Keratinization	30/283	147/8501	5.21448e-16	1.0429e-13	9.27629e-14	Krt77/Krt27/Krt31/Krt78/2310057N15Rik/Krt32/Krt16/Krt75/Cdsn/Lipk/Gm10024/Krt4/Spink5/Dsg3/Krt6a/Evpl/Lipm/Krt15/Krt79/Krt23/Perp/Dsp/Krt7/Pkp1/Krt17/Krt19/Krt5/Krt14/Krt8/Krt18	30
	R-MMU-1474244	Extracellular matrix organization	28/283	231/8501	2.40697e-09	2.20074e-07	1.9575e-07	Fga/Matn3/Ibsp/Capn9/Gdf5/A2m/Timp1/Fgb/Tnc/Adamts3/Fgg/Mmp13/Acan/Col4a5/Col12a1/Col7a1/Col16a1/Col17a1/Col8a2/Cdh1/Fbn2/Col9a1/Col4a6/Spp1/Capn8/Col9a3/Col11a1/Col2a1	28
	R-MMU-216083	Integrin cell surface interactions	15/283	66/8501	2.75092e-09	2.20074e-07	1.9575e-07	Fga/Ibsp/Fgb/Tnc/Fgg/Col4a5/Col7a1/Col16a1/Col8a2/Cdh1/Col9a1/Col4a6/Spp1/Col9a3/Col2a1	15
	R-MMU-1474228	Degradation of the extracellular matrix	16/283	107/8501	4.21593e-07	2.81062e-05	2.49997e-05	Capn9/A2m/Timp1/Mmp13/Acan/Col4a5/Col12a1/Col7a1/Col8a2/Cdh1/Fbn2/Col4a6/Spp1/Capn8/Col11a1/Col2a1	16
	R-MMU-1650814	Collagen biosynthesis and modifying enzymes	12/283	60/8501	4.92194e-07	2.81254e-05	2.50168e-05	Adamts3/Col4a5/Col12a1/Col7a1/Col16a1/Col17a1/Col8a2/Col9a1/Col4a6/Col9a3/Col11a1/Col2a1	12
	R-MMU-1474290	Collagen formation	13/283	73/8501	6.73868e-07	3.36934e-05	2.99694e-05	Adamts3/Mmp13/Col4a5/Col12a1/Col7a1/Col16a1/Col17a1/Col8a2/Col9a1/Col4a6/Col9a3/Col11a1/Col2a1	13
	R-MMU-8948216	Collagen chain trimerization	9/283	35/8501	1.45832e-06	6.48142e-05	5.76505e-05	Col12a1/Col7a1/Col16a1/Col17a1/Col8a2/Col9a1/Col9a3/Col11a1/Col2a1	9
	R-MMU-2022090	Assembly of collagen fibrils and other multimeric structures	10/283	45/8501	1.62087e-06	6.48346e-05	5.76687e-05	Mmp13/Col4a5/Col12a1/Col7a1/Col8a2/Col9a1/Col4a6/Col9a3/Col11a1/Col2a1	10
	R-MMU-983712	Ion channel transport	17/283	169/8501	4.4767e-05	0.00137745	0.0012252	Atp12a/Clcnka/Scnn1g/Ano7/Atp7b/Clca1/Scnn1b/Scnn1a/Atp13a4/Ano1/Trpv6/Atp6v0a4/Atp2c2/Fxyd3/Ano9/Atp6v1b1/Atp6v1c2	17
	R-MMU-5686938	Regulation of TLR by endogenous ligand	5/283	19/8501	0.000312518	0.0082435	0.00733238	Fga/Sftpd/Fgb/Cd14/Fgg	5
	R-MMU-351906	Apoptotic cleavage of cell adhesion proteins	4/283	11/8501	0.00032974	0.0082435	0.00733238	Dsg3/Dsp/Cdh1/Pkp1	4
	R-MMU-1442490	Collagen degradation	8/283	55/8501	0.000426682	0.0100396	0.00892993	Mmp13/Col4a5/Col12a1/Col7a1/Col8a2/Col4a6/Col11a1/Col2a1	8
	R-MMU-977068	Termination of O-glycan biosynthesis	4/283	15/8501	0.00122735	0.0258389	0.022983	Muc20/Muc1/Muc4/Muc15	4
	R-MMU-3928663	EPHA-mediated growth cone collapse	4/283	17/8501	0.00203038	0.0406076	0.0361194	Efna3/Efna4/Ngef/Efna5	4
	R-MMU-3000178	ECM proteoglycans	6/283	42/8501	0.00246796	0.0470088	0.0418131	Matn3/Tnc/Acan/Col9a1/Col9a3/Col2a1	6
	R-MMU-2672351	Stimuli-sensing channels	9/283	95/8501	0.00424397	0.077163	0.0686345	Clcnka/Scnn1g/Ano7/Clca1/Scnn1b/Scnn1a/Ano1/Trpv6/Ano9	9
	R-MMU-140875	Common Pathway of Fibrin Clot Formation	4/283	21/8501	0.00459782	0.0799621	0.0711242	Fga/Proc/Fgb/Fgg	4
	R-MMU-446728	Cell junction organization	7/283	64/8501	0.00515664	0.085944	0.0764449	Cdh18/Cdh3/Nectin4/Col17a1/Cdh1/Krt5/Krt14	7
	R-MMU-140877	Formation of Fibrin Clot (Clotting Cascade)	5/283	36/8501	0.00638309	0.091522	0.0814064	Fga/Proc/A2m/Fgb/Fgg	5
	R-MMU-71064	Lysine catabolism	3/283	12/8501	0.00642313	0.091522	0.0814064	Aadat/Aass/Crym	3
	Reactome_UP DEGs
	ID	Description	Gene Ratio	Bg Ratio	P value	P Adj	q value	Gene ID	Count
	R-MMU-390522	Striated Muscle Contraction	21/123	32/8501	4.45518e-32	1.25191e-29	1.14897e-29	Tnnt3/Myl3/Neb/Actn3/Acta1/Mybpc2/Tcap/Myl2/Tnni2/Tnni1/Myl1/Des/Tnnc2/Tnnc1/Actc1/Actn2/Tpm2/Tnnt1/Tmod4/Tmod1/Myh6	21
	R-MMU-397014	Muscle contraction	33/123	153/8501	1.826e-30	2.56554e-28	2.35459e-28	Ryr1/Tnnt3/Myl3/Atp2a1/Neb/Casq1/Trdn/Actn3/Acta1/Mybpc2/Tcap/Myl2/Tnni2/Tnni1/Camk2a/Cacng6/Myl1/Des/Slc8a3/Tnnc2/Tnnc1/Mylpf/Actc1/Atp1a2/Actn2/Tpm2/Tnnt1/Tmod4/Camk2b/Tmod1/Nppc/Atp2b3/Myh6	33
	R-MMU-5578775	Ion homeostasis	9/123	52/8501	4.51282e-08	4.22701e-06	3.87944e-06	Ryr1/Atp2a1/Casq1/Trdn/Camk2a/Slc8a3/Atp1a2/Camk2b/Atp2b3	9
	R-MMU-5576891	Cardiac conduction	11/123	98/8501	1.43539e-07	1.00836e-05	9.25448e-06	Ryr1/Atp2a1/Casq1/Trdn/Camk2a/Cacng6/Slc8a3/Atp1a2/Camk2b/Nppc/Atp2b3	11
	R-MMU-983712	Ion channel transport	10/123	169/8501	0.000160197	0.00900308	0.0082628	Ryr1/Atp2a1/Casq1/Trdn/Clcn1/Camk2a/Ano5/Atp1a2/Camk2b/Atp2b3	10
	R-MMU-70171	Glycolysis	6/123	60/8501	0.000214685	0.0100544	0.00922768	Eno3/Pfkm/Pgam2/Aldoa/Hk2/Gck	6
	R-MMU-8951664	Neddylation	11/123	220/8501	0.000329094	0.0132108	0.0121245	Asb11/Klhl41/Asb2/Fbxo40/Asb10/Asb16/Asb14/Asb12/Ankrd9/Kbtbd13/Asb5	11
	R-MMU-70326	Glucose metabolism	6/123	79/8501	0.000953488	0.0294733	0.0270499	Eno3/Pfkm/Pgam2/Aldoa/Hk2/Gck	6
	R-MMU-418359	Reduction of cytosolic Ca++ levels	3/123	14/8501	0.000957614	0.0294733	0.0270499	Atp2a1/Slc8a3/Atp2b3	3
	R-MMU-936837	Ion transport by P-type ATPases	5/123	54/8501	0.00104887	0.0294733	0.0270499	Atp2a1/Camk2a/Atp1a2/Camk2b/Atp2b3	5
	R-MMU-438066	Unblocking of NMDA receptors, glutamate binding and activation	3/123	22/8501	0.00372357	0.0871936	0.0800241	Camk2a/Actn2/Camk2b	3
	R-MMU-75876	Synthesis of very long-chain fatty acyl-CoAs	3/123	22/8501	0.00372357	0.0871936	0.0800241	Elovl3/Acsl6/Tecrl	3
	Wiki Pathways_DOWN DEGs
	ID	Description	Gene Ratio	Bg Ratio	P value	P Adj	q value	Gene ID	Count
	WP85	Focal adhesion	15/141	185/4560	0.000511997	0.0314554	0.0294688	Ibsp (15891), Lamc2 (16782), Tnk1 (83813), Hgf (15234), Met (17295), Pak6 (214230), Pdgfc (54635), Steap4 (21923), Col4a6 (94216)/Ibsp (15891), Lamc2 (16782), Pak6 (83813), Hgf (15234), Pdgfc (214230), Get1-Sh3bgr (54635), Tnc (21923), Col4a6 (94216), Spp1 (20750), Lama1 (16772), Pak3 (18481), Atp6v0a2 (18481), Col11a1 (12814), Col2a1 (12824)	15
	WP2841	Focal adhesion: PI3K-Akt-mTOR signaling pathway	21/141	317/4560	0.000629108	0.0314554	0.0294688	Ifna2 (15965), Dot2 (16780), Ibsp (15891), Lamc2 (16782), Efna4 (13638), Met (13639), Hgf (15234), Met (17295), Mt4 (18705), Pdgfc (54635), Steap4 (21923), Kit (16590), Efna5 (13640), Col4a6 (94216), Spp1 (20750), Lama1 (16772), Prlr (19116), Fgfr2 (14183), Foxa1 (15375), Col11a1 (12814), Col2a1 (12824).	21
	WP3632	Lung fibrosis	7/141	60/4560	0.00228346	0.0761155	0.0713082	Sftpa1 (20387), Hgf (15234), Timp1 (21857), Calca (12310), Cxcl15 (20309), Dsp (109620), Spp1 (20750).	7
	WP488	Alpha 6 beta 4 integrin signaling pathway	7/141	66/4560	0.00394759	0.0986898	0.0924568	Hgf (15234), Met (17295), Crybg2 (23844), Dsp (12821), Arvcf (109620), Lama1 (16772)	7
	Wiki Pathways_UP DEGs
	ID	Description	Gene Ratio	Bg Ratio	P value	P Adj	q value	Gene ID	Count
	WP157	Glycolysis and gluconeogenesis	8/62	49/4560	2.14139e-07	1.15635e-05	1.03688e-05	Eno3 (13808), Pfkm (18642), Pgam2 (56012), Slc2a4 (20528), Aldoa (11674), Slc2a5 (56485), Hk2 (15277), Gck4(103988)	8
	WP553	Calcium regulation in cardiac cells	8/62	144/4560	0.000649707	0.0175421	0.0157298	Ryr1 (20190), Tshb (12372), Cacna1s (12292), Camk2a (12322), Atp2b3 (110893), Camk2b (12323), Atp2b3 (320707), Chrm5 (213788)	8
	WP385	Myometrial relaxation and contraction pathways	7/62	149/4560	0.00376464	0.0677635	0.0607626	Ryr1 (20190), Acta1 (11459), Mylk2 (228785), Myl2 (17906), Camk2a (12322), Actc1 (11464), Camk2b (12323).	7
