# Supplementary material for: Cabergoline as a Novel Strategy for Post-Pregnancy Breast Cancer Prevention in Mice and Human
Source: Research Square preprint supplement (doi:10.21203/rs.3.rs-3854490/v1), 2024-02-05
Supplement: Supplementary file 18 [file ec92c766cd10eb3a2ba26672.xlsx]

## Sheet: Supplementary Table S8
	Cluster Name	ID	GO BP	Gene Ratio	Bg Ratio	P value	Adjusted P value	q value	Gene ID	Count
	Cluster 1: Epithelial Cell Proliferation	GO:0010839	Negative regulation of keratinocyte proliferation	6/627	27/28943	2.02657e-05	0.000620493	0.000509894	Ovol1/Irf6/Kdf1/Eppk1/Vdr/Fgfr2	6
		GO:0043616	Keratinocyte proliferation	11/627	59/28943	4.92796e-08	4.37457e-06	3.59483e-06	Ovol1/Cdh3/Ovol2/Reg3g/Irf6/Kdf1/Fermt1/Trp63/Eppk1/Vdr/Fgfr2	11
		GO:0010837	Regulation of keratinocyte proliferation	10/627	49/28943	8.14042e-08	6.13136e-06	5.03849e-06	Ovol1/Cdh3/Ovol2/Reg3g/Irf6/Kdf1/Trp63/Eppk1/Vdr/Fgfr2	10
		GO:2000647	Negative regulation of stem cell proliferation	5/627	27/28943	0.000255327	0.00506084	0.00415878	Ovol1/Ovol2/Irf6/Kdf1/Fermt1	5
		GO:0072089	Stem cell proliferation	9/627	147/28943	0.00486658	0.0469937	0.0386174	Ovol1/Ovol2/Irf6/Kdf1/Fermt1/Trp63/Sox9/Fgfr2/Epcam	9
		GO:0050679	Positive regulation of epithelial cell proliferation	15/627	232/28943	0.000179467	0.00386212	0.00317373	Ang4/Bnc1/Erbb4/Cdh3/Hpn/Arg1/Reg3g/Trp63/Cxadr/Eppk1/Sox9/Esrp2/Ptn/Fgfr2/Esrp1	15
		GO:0050680	Negative regulation of epithelial cell proliferation	16/627	190/28943	4.32393e-06	0.000166162	0.000136545	Gdf5/Muc16/Krt4/Ovol1/Etv4/Hpn/Irf6/Kdf1/Eppk1/Cdh1/Vdr/Sox9/Marveld3/Ptn/Cnmd/Fgfr2	16
		GO:0050678	Regulation of epithelial cell proliferation	32/627	442/28943	3.44727e-09	4.18788e-07	3.44142e-07	Nkx2-3/Ang4/Fut1/Bnc1/Gdf5/Muc16/Krt4/Ovol1/Etv4/Erbb4/Cdh3/Hpn/Arg1/Ovol2/Reg3g/Irf6/Kdf1/Trp63/Cxadr/Eppk1/Cdh1/Vdr/Sox9/Marveld3/Tacstd2/Pgr/Esrp2/Serpinb5/Ptn/Cnmd/Fgfr2/Esrp1	32
	Cluster 2: Morphogenesis, Mammary Gland Development and Branching	GO:0060560	developmental growth involved in morphogenesis	16/627	278/28943	0.000411171	0.00743705	0.00611145	Cst10/Edn2/Kif26b/Pak6/Myo5b/Slit2/Tfap2c/Tnc/Wnt7b/Map2/Crabp2/Efna5/Postn/Sox9/Ptk7/Fgfr2	16
		GO:0030879	Mammary gland development	17/627	165/28943	1.26018e-07	8.62876e-06	7.09075e-06	Etv4/Erbb4/Atp7b/Slit2/Irf6/Tfap2c/Atp2c2/Csn3/Tph1/Vdr/Sox9/Elf5/Pgr/Prlr/Fgfr2/Elf3/Csn2	17
		GO:0061180	Mammary gland epithelium development	11/627	79/28943	1.07576e-06	4.84864e-05	3.9844e-05	Etv4/Erbb4/Slit2/Irf6/Tfap2c/Atp2c2/Vdr/Elf5/Pgr/Prlr/Fgfr2	11
		GO:0060444	Branching involved in mammary gland duct morphogenesis	4/627	29/28943	0.00336928	0.0358438	0.0294549	Etv4/Tfap2c/Vdr/Pgr	4
		GO:0060603	Mammary gland duct morphogenesis	6/627	41/28943	0.000238027	0.00487882	0.0040092	Etv4/Slit2/Tfap2c/Vdr/Pgr/Fgfr2	6
		GO:0060443	Mammary gland morphogenesis	7/627	60/28943	0.000309242	0.00588184	0.00483345	Etv4/Slit2/Tfap2c/Vdr/Pgr/Fgfr2/Elf3	7
		GO:0022612	Gland morphogenesis	22/627	157/28943	4.28416e-12	1.34451e-09	1.10486e-09	Nkx2-3/Etv4/Hpn/Hgf/Met/Slit2/Edar/Tfap2c/Tnc/Trp63/Cdh1/Vdr/Sox9/Lama1/Pgr/Esrp2/Serpinb5/Ptn/Fgfr2/Foxa1/Elf3/Esrp1	22
		GO:0048732	Gland development	36/627	483/28943	1.60962e-10	2.46985e-08	2.02961e-08	Nkx2-3/Foxa3/Proc/Etv4/Erbb4/Atp7b/Stra6/Hpn/Hgf/Met/Slit2/Edar/Irf6/Tfap2c/Tnc/Atp2c2/Trp63/Cdh1/Csn3/Tfcp2l1/Hp/Tph1/Vdr/Sox9/Elf5/Lama1/Pgr/Esrp2/Serpinb5/Ptn/Prlr/Fgfr2/Foxa1/Elf3/Esrp1/Csn2	36
		GO:0060562	Epithelial tube morphogenesis	27/627	397/28943	2.05082e-07	1.26613e-05	1.04045e-05	Wnt9b/Etv4/Kif26b/Irx3/Met/Ovol2/Slit2/Tfap2a/Tfap2c/Tnc/Cthrc1/Grhl2/Shroom3/Vdr/Sox9/Ptk7/Spint1/Lama1/Tacstd2/Pgr/Esrp2/Irx1/Fgfr2/Foxa1/Irx2/Esrp1/Lcn2	27
		GO:0048754	Bbranching morphogenesis of an epithelial tube	15/627	191/28943	1.97156e-05	0.000613627	0.000504253	Wnt9b/Etv4/Met/Slit2/Tfap2c/Tnc/Vdr/Sox9/Lama1/Tacstd2/Pgr/Esrp2/Fgfr2/Foxa1/Esrp1	15
		GO:0061134	Morphogenesis of a branching epithelium	20/627	229/28943	1.56743e-07	1.0541e-05	8.66212e-06	Wnt9b/Etv4/Hgf/Met/Slit2/Tfap2c/Tnc/Trp63/Grhl2/Cdh1/Vdr/Sox9/Spint1/Lama1/Tacstd2/Pgr/Esrp2/Fgfr2/Foxa1/Esrp1	20
		GO:0035272	exocrine system development	10/627	54/28943	2.15073e-07	1.3064e-05	1.07354e-05	Hgf/Met/Edar/Cdh1/Tfcp2l1/Sox9/Lama1/Esrp2/Fgfr2/Esrp1	10
		GO:0060441	epithelial tube branching involved in lung morphogenesis	7/627	37/28943	1.26726e-05	0.000422346	0.000347065	Tnc/Sox9/Lama1/Esrp2/Fgfr2/Foxa1/Esrp1	7
		GO:0060644	mammary gland epithelial cell differentiation	4/627	18/28943	0.000524096	0.0090956	0.00747437	Erbb4/Irf6/Elf5/Prlr	4
		GO:0048012	hepatocyte growth factor receptor signaling pathway	3/627	13/28943	0.00246061	0.0292324	0.0240219	Muc20/Hgf/Met	3
		GO:1905330	regulation of morphogenesis of an epithelium	6/627	73/28943	0.00503526	0.0483341	0.0397189	Hgf/Met/Cdh1/Sox9/Tacstd2/Lcn2	6
		GO:0072175	epithelial tube formation	13/627	170/28943	9.1289e-05	0.00218977	0.00179946	Wnt9b/Irx3/Ovol2/Tfap2a/Cthrc1/Grhl2/Shroom3/Sox9/Ptk7/Spint1/Irx1/Fgfr2/Irx2	13
		GO:0001738	morphogenesis of a polarized epithelium	8/627	89/28943	0.00070257	0.0116558	0.00957828	Wnt9b/Erbb4/Syne4/Wnt7b/Cthrc1/Trp63/Ptk7/Lama1	8
