# Supplementary material for: Cabergoline as a Novel Strategy for Post-Pregnancy Breast Cancer Prevention in Mice and Human
Source: Research Square preprint supplement (doi:10.21203/rs.3.rs-3854490/v1), 2024-02-05
Supplement: Supplementary file 19 [file ef9ba03630770ecf1db8f012.xlsx]

## Sheet: Supplementary Table S13
	Cluster 1: Proliferation	Cluster 2: Development
	Adipoq	Adipoq
	Bcl2l10	Bcl2l10
	Chrna4	Cidec
	Cidec	Cyp2w1
	Fasn	Cyp3a57
	Fgf17	Fasn
	Gdf5	Fgf17
	Klb	Gpd1
	Lep	Hist1h2ao
	Me1	Hs3st6
	Muc4	Klb
	Rbp4	Krt14
	Serpinb5	Krt18
	Sox2	Krt5
	Tmprss2	Lep
	Trim29	Rhov
	Wap	Scd1
		Serpinb5
		Slco1a5
		Smarcad1
		Sox2
		Srarp
