# Supplementary material for: Cabergoline as a Novel Strategy for Post-Pregnancy Breast Cancer Prevention in Mice and Human
Source: Research Square preprint supplement (doi:10.21203/rs.3.rs-3854490/v1), 2024-02-05
Supplement: Supplementary file 20 [file f2c549cc7cbd3447fbe95900.xlsx]

## Sheet: Supplementary Table S19
		Variable	Categoria	Global	Control (n=25863)	Exposition (n=1604)	P value
	Sociodemographic characteristics	Age at index date (mean, SD)		29.67 (5.39)	29.70 (5.38)	29.10 (5.46)	<0.001
		Level of socioeconomic deprivation MEDEA (n, %)					0.089
			Lowest deprivation quintile	2280 (8.30%)	2156 (8.34%)	124 (7.73%)
			Q2	3527 (12.84%)	3315 (12.82%)	212 (13.22%)
			Q3	3802 (13.84%)	3560 (13.76%)	242 (15.09%)
			Q4	4082 (14.86%)	3828 (14.80%)	254 (15.84%)
			Highest deprivation quintile	4182 (15.23%)	3934 (15.21%)	248 (15.46%)
			Rural	5376 (19.57%)	5058 (19.56%)	318 (19.83%)
			Unknown	4218 (15.36%)	4012 (15.51%)	206 (12.84%)
		Duration of pregnancy (mean, SD)		39.50 (1.72)	39.51 (1.73)	39.44 (1.54)	0.092
	Diagnostics	Obesity (n, %)		2228 (8.11%)	2079 (8.04%)	149 (9.29%)	0.083
		Dyslipidemia (n, %)		808 (2.94%)	766 (2.96%)	42 (2.62%)	0.476
		Arterial hypertension (n, %)		187 (0.68%)	170 (0.66%)	17 (1.06%)	0.081
		Type 1 diabetes mellitus (n, %)		49 (0.18%)	47 (0.18%)	2 (0.12%)	0.826
		Type 2 diabetes mellitus (n, %)		41 (0.15%)	38 (0.15%)	3 (0.19%)	0.944
		Neoplasia (no breast cancer)		141 (0.51%)	133 (0.51%)	8 (0.50%)	1
		Family history of other malignancies (no breast cancer) (n, %)		133 (0.48%)	124 (0.48%)	9 (0.56%)	0.786
		Family history of breast cancer (n, %)		179 (0.65%)	168 (0.65%)	11 (0.69%)	0.988
		Personal history of other malignancies (n, %)		6 (0.02%)	5 (0.02%)	1 (0.06%)	0.794
		Previous chemotherapy (n, %)		9 (0.03%)	9 (0.03%)	0 (0.00%)	0.971
		Polycystic ovarian disease (n, %)		570 (2.08%)	539 (2.08%)	31 (1.93%)	0.747
		Hormone replacement therapy (n, %)		4120 (15.00%)	3825 (14.79%)	295 (18.39%)	<0.001
		Hormone replacement therapy (n of package, IR)		4.00 [2.00, 12.00]	4.00 [1.00, 12.00]	6.00 [2.00, 13.00]	0.07
		Drugs of breast cancer prevention (n, %)		14 (0.05%)	13 (0.05%)	1 (0.06%)	1
		Previous mammography (n, %)		779 (2.84%)	727 (2.81%)	52 (3.24%)	0.352
	Risk factors	Smoking status (n, %)					<0.001
			Never smoker	15398 (60.82%)	14642 (61.54%)	756 (49.57%)
			Current smoker	5973 (23.59%)	5491 (23.08%)	482 (31.61%)
			Former smoker	3948 (15.59%)	3661 (15.39%)	287 (18.82%)
		Height (cm, IR)		162.00 [158.00, 167.00]	162.00 [158.00, 167.00]	162.00 [158.00, 167.00]	0.973
		Weight (Kg, IR)		71.50 [63.80, 80.10]	71.50 [63.70, 80.00]	72.90 [64.27, 82.00]	<0.001
		Body mass index (Kg/m2, IR)		27.05 [24.31, 30.20]	27.02 [24.28, 30.18]	27.48 [24.74, 30.45]	<0.001
		Alcohol intake (n, %)					0.031
			No consumption	11103 (79.65%)	10406 (79.46%)	697 (82.58%)
			Low risk	2746 (19.70%)	2607 (19.91%)	139 (16.47%)
			Risk	91 (0.65%)	83 (0.63%)	8 (0.95%)
		Physical activity (n, %)					0.551
			0	284 (8.94%)	264 (8.88%)	20 (9.71%)
			1	576 (18.12%)	540 (18.17%)	36 (17.48%)
			2	853 (26.84%)	800 (26.92%)	53 (25.73%)
			3	1391 (43.77%)	1299 (43.71%)	92 (44.66%)
			4	71 (2.23%)	67 (2.25%)	4 (1.94%)
			Desconocido	3 (0.09%)	2 (0.07%)	1 (0.49%)
		Cardiovascular risk (HR, 95% CI)		0.37 [0.25, 0.62]	0.37 [0.26, 0.63]	0.38 [0.24, 0.55]	0.59
	Follow-up characteristics	Breast cancer (n, %)					0.062
			Breast cancer development	127 (0.46%)	125 (0.48%)	2 (0.12%)
			Without breast cancer	27340 (99.54%)	25738 (99.52%)	1602 (99.88%)
